# Supplementary material for: Shorter, better, faster, stronger? Comparing the identification performance of full-length and mini-DNA barcodes for apid bees (Hymenoptera: Apidae)
Source: Springer Nature journal article supplement (doi:10.1007/s13592-022-00958-x), 2022-09-09

**Supplementary Figure 1.** Barcode gaps of all genera (and *Bombus* subgenera) in our dataset. The panels on the left (in orange) are the distance boxplots of the mini-barcodes; panels on the right (in blue) are the distance boxplots of full-length barcodes

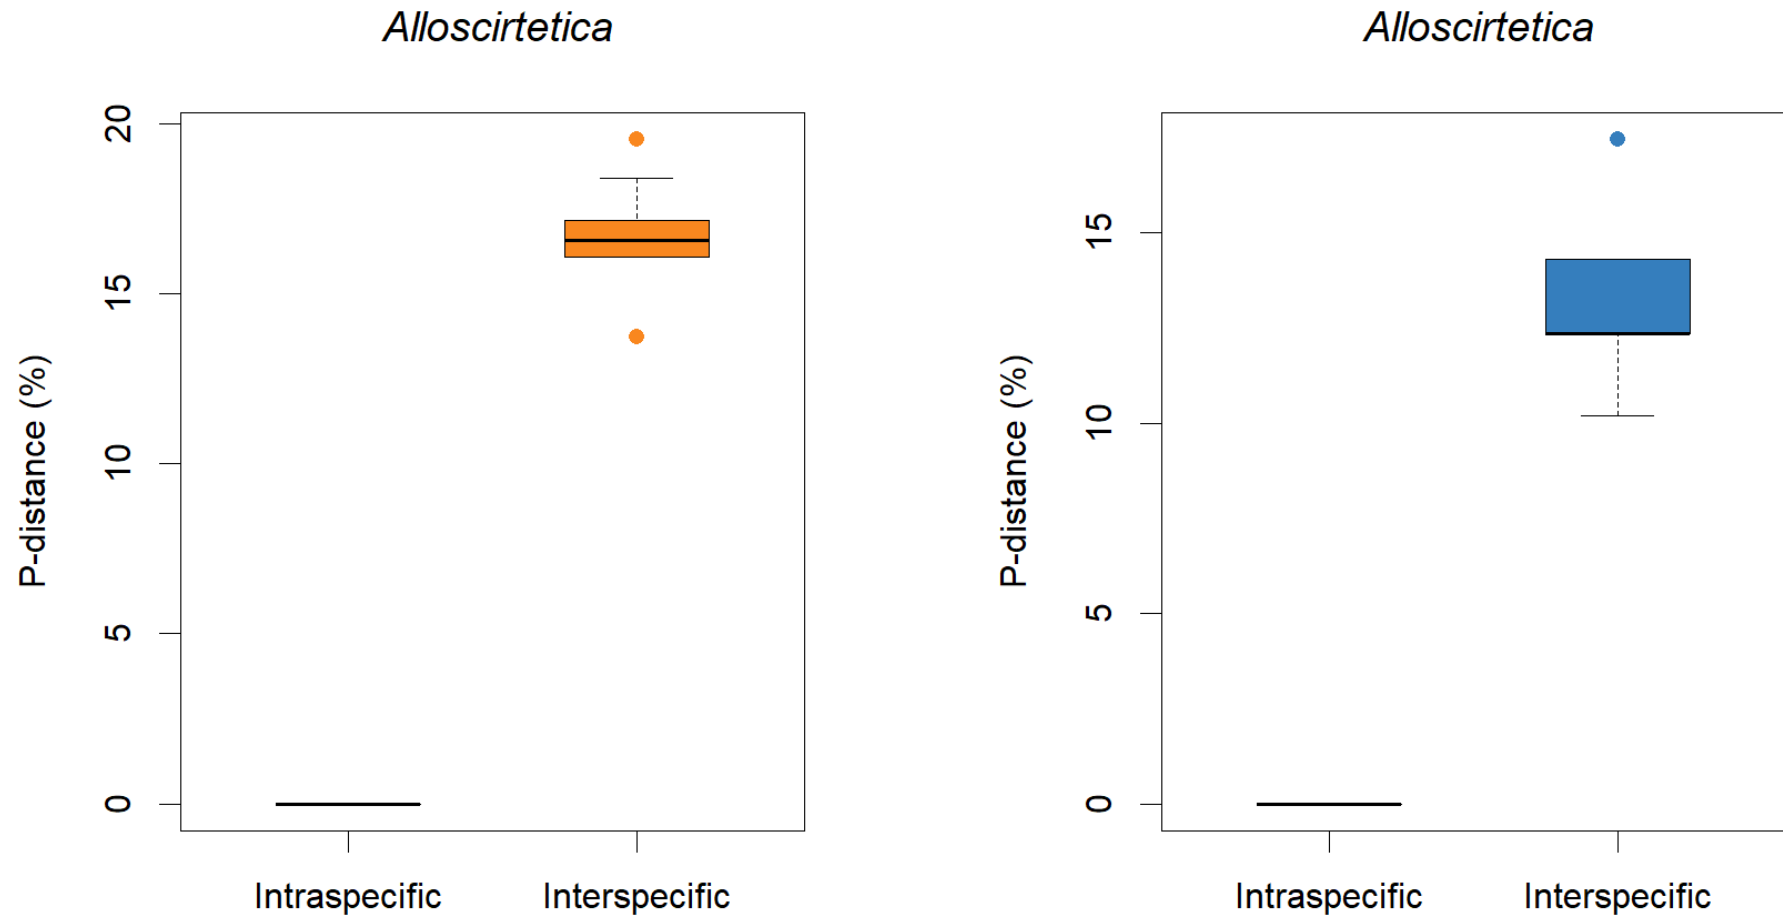

*Amegilla*

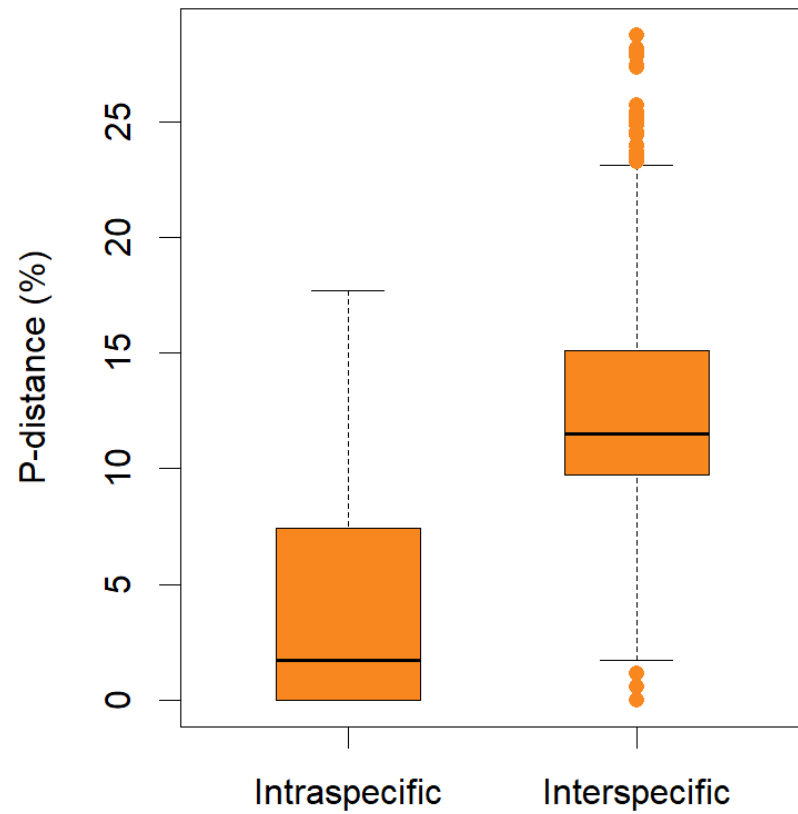

*Amegilla*

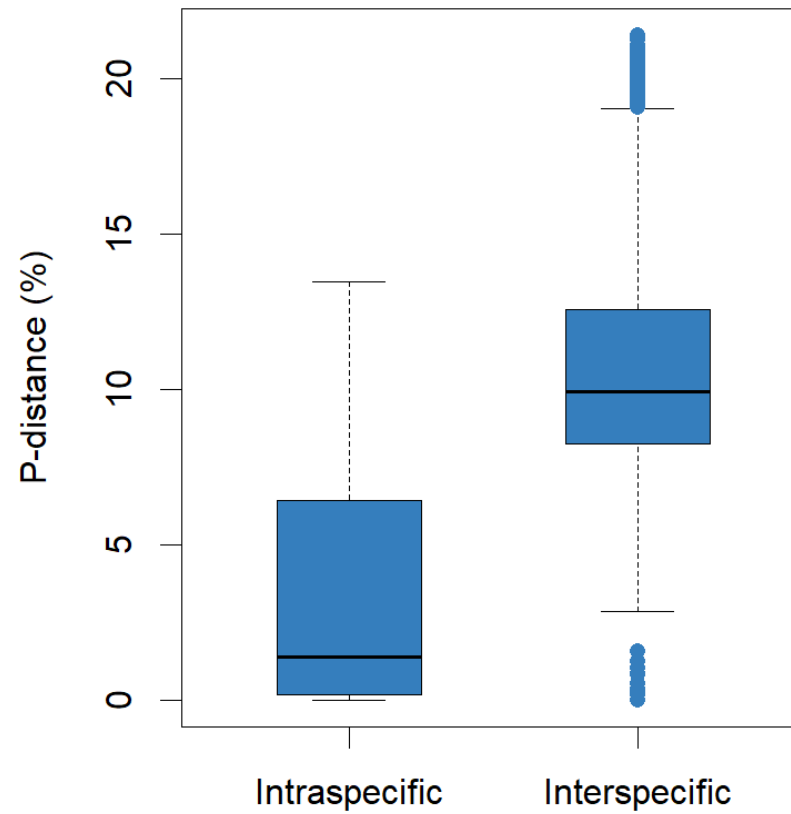

*Ammobatoides*

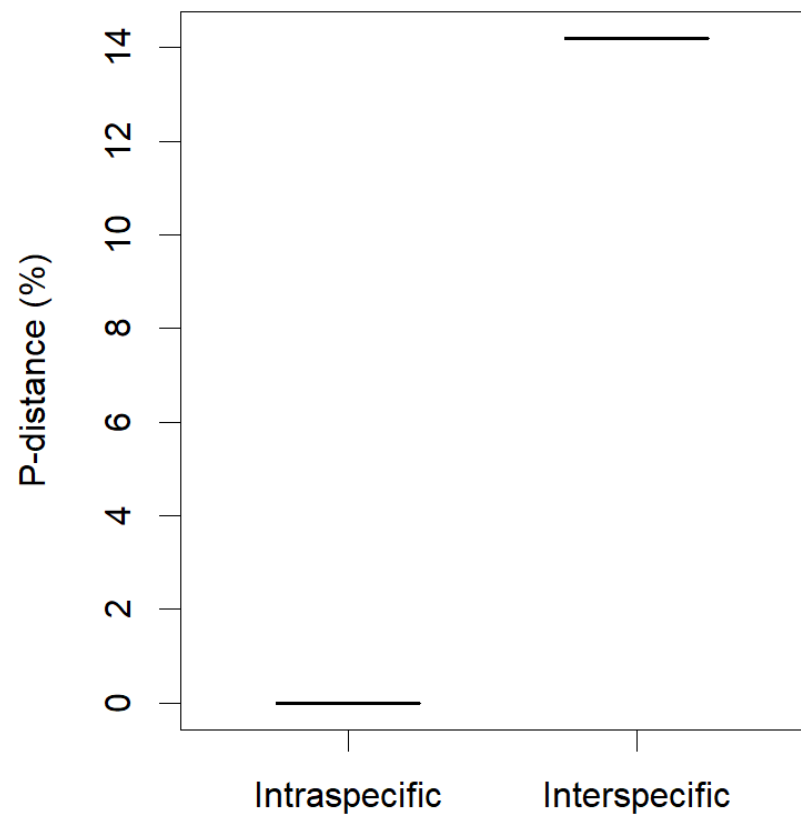

*Ammobatoides*

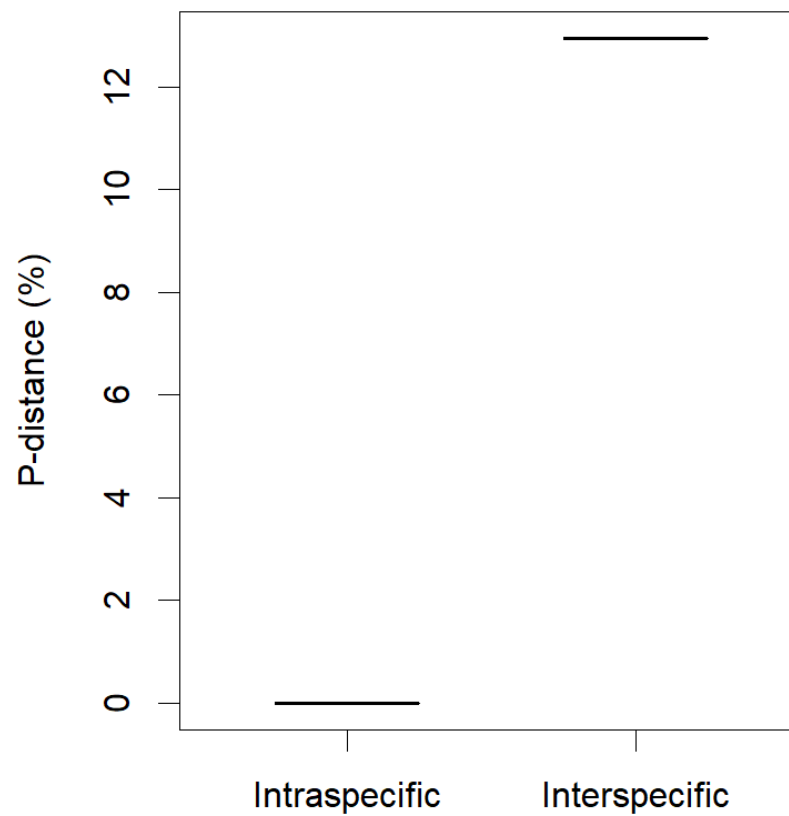

*Anthophora*

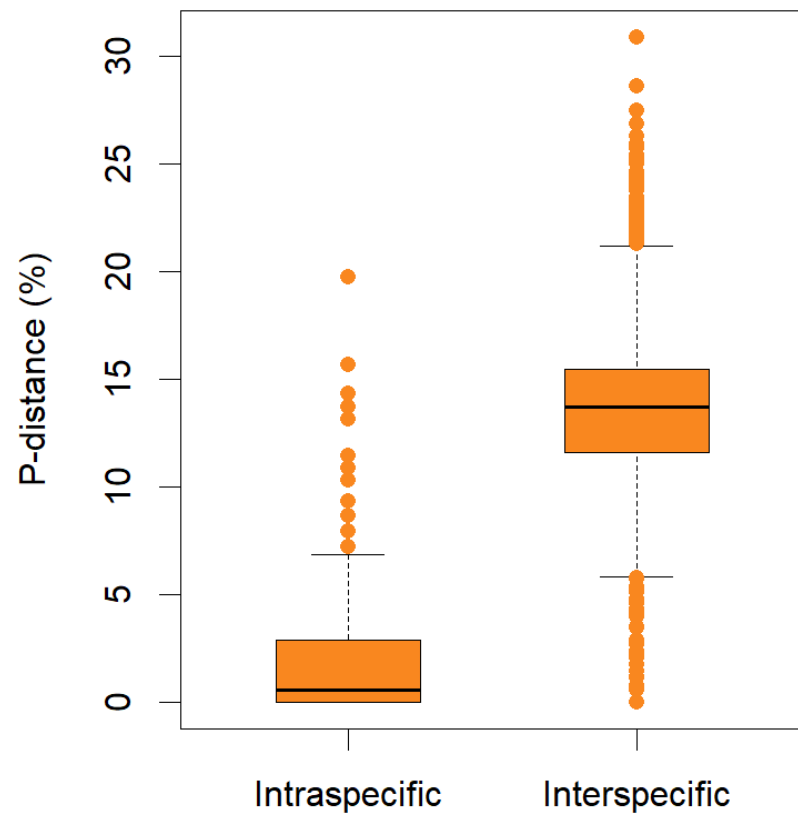

*Anthophora*

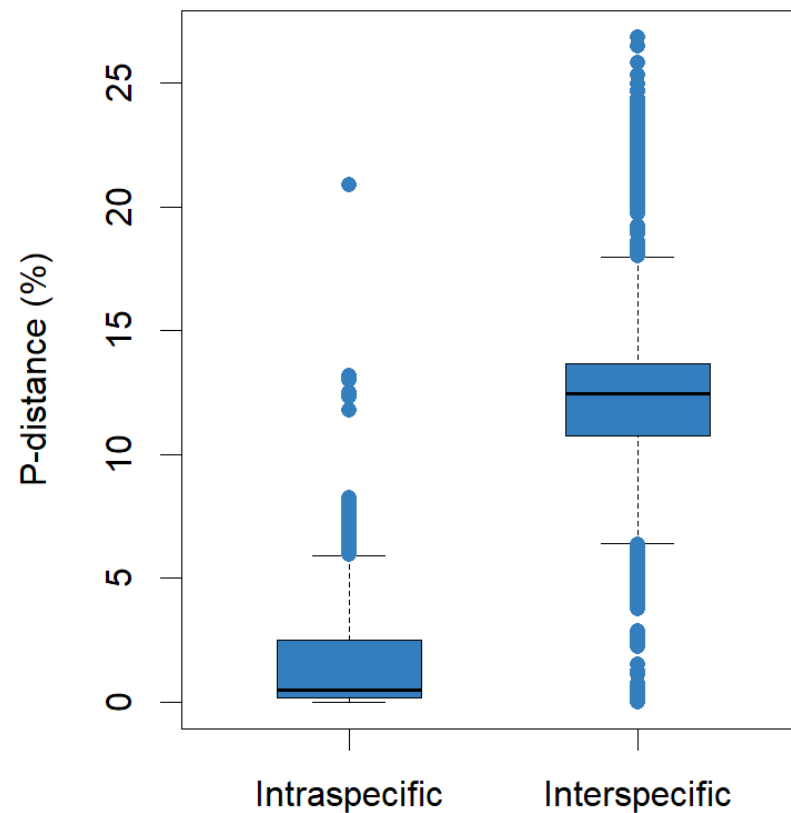

*Anthophorula*

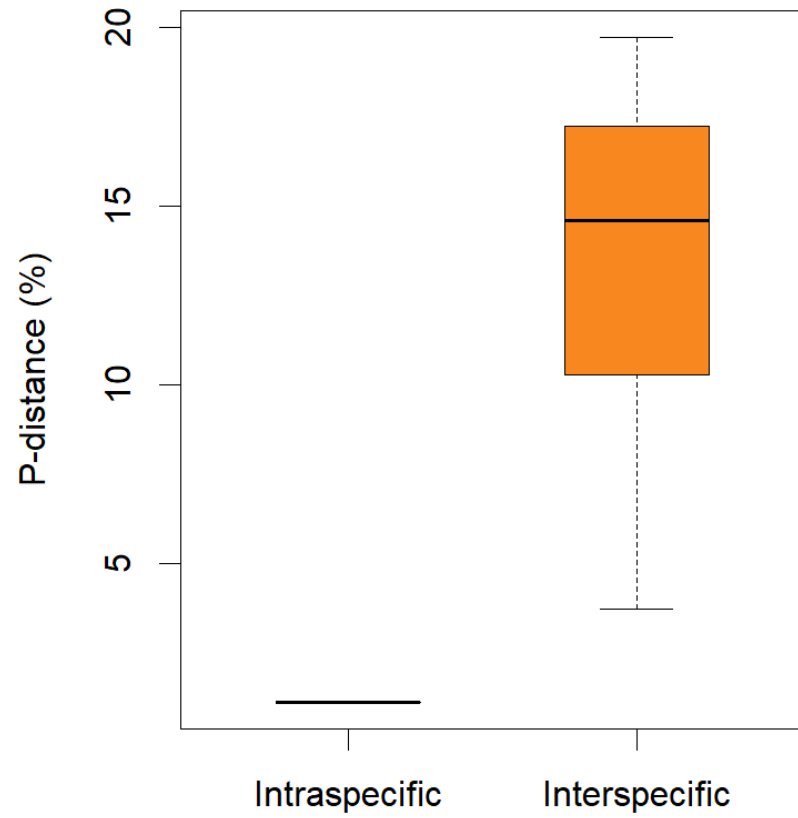

*Anthophorula*

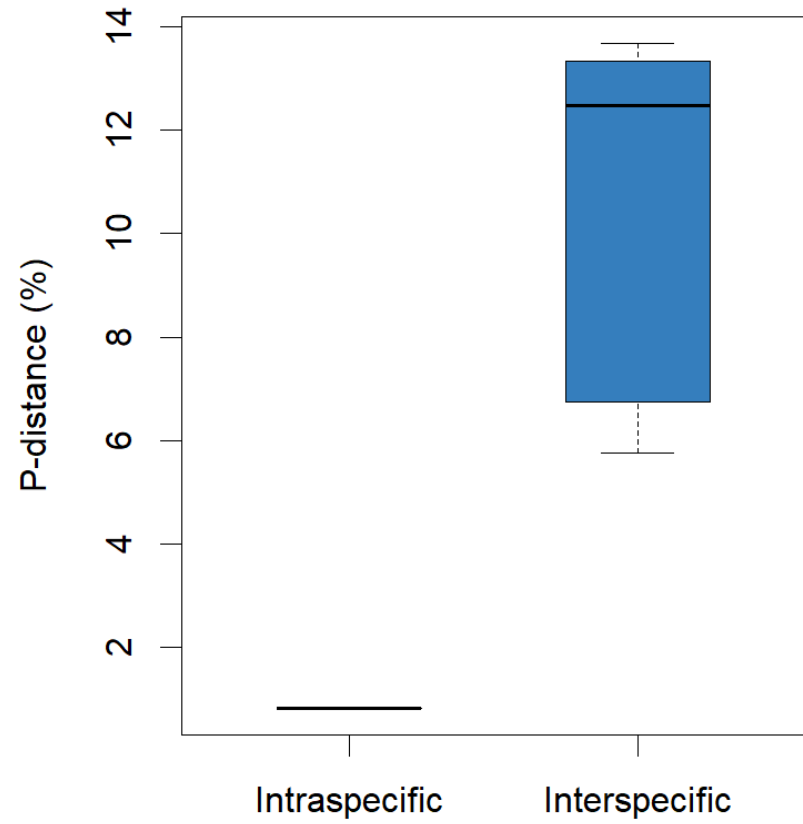

*Apis*

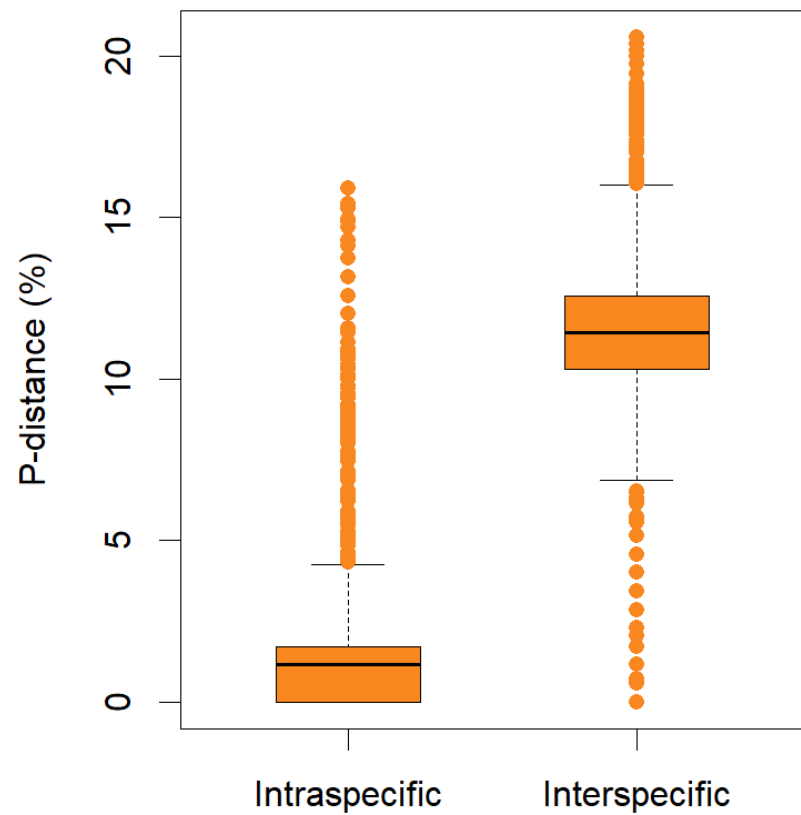

*Apis*

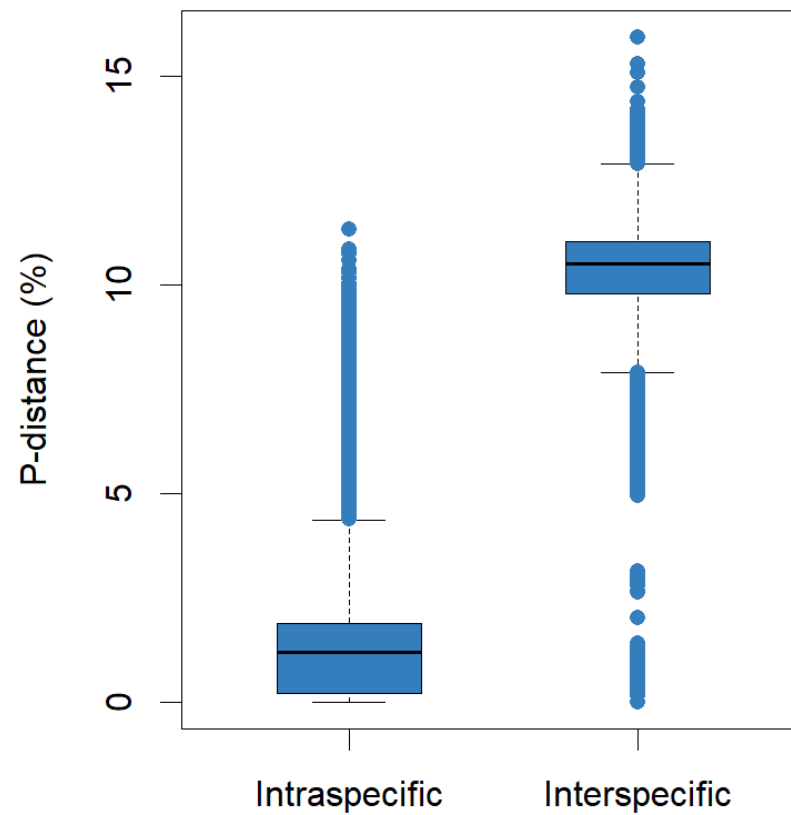

*Arhysoceble*

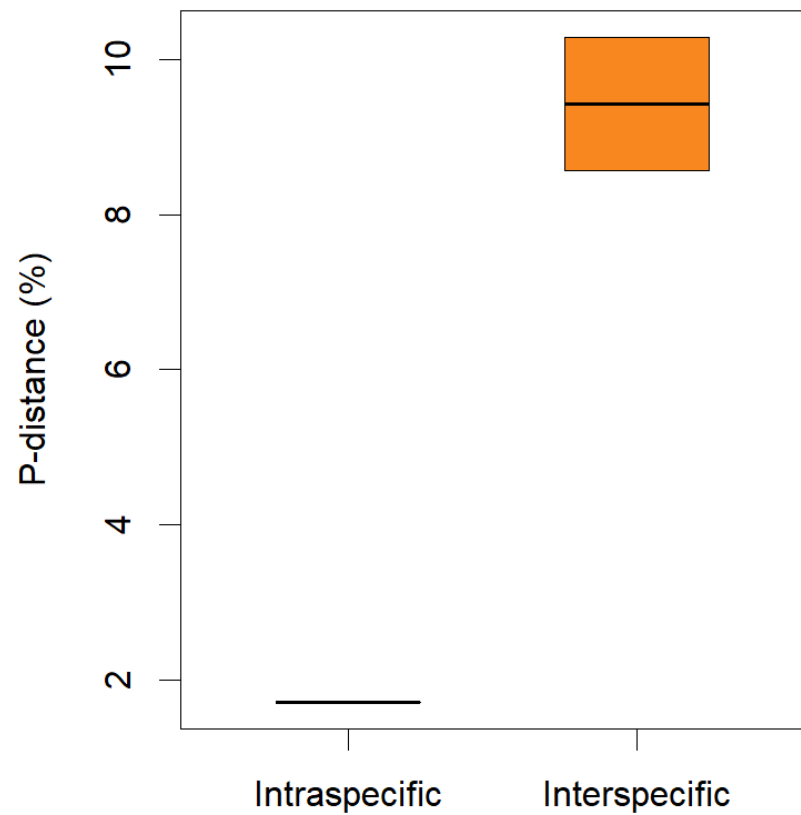

*Arhysoceble*

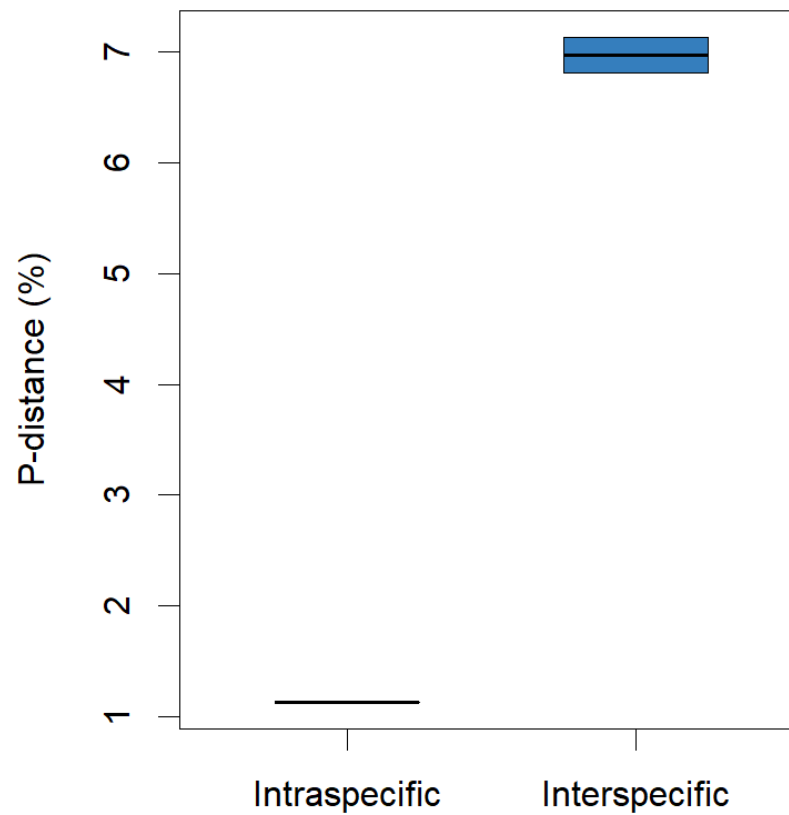

*Biastes*

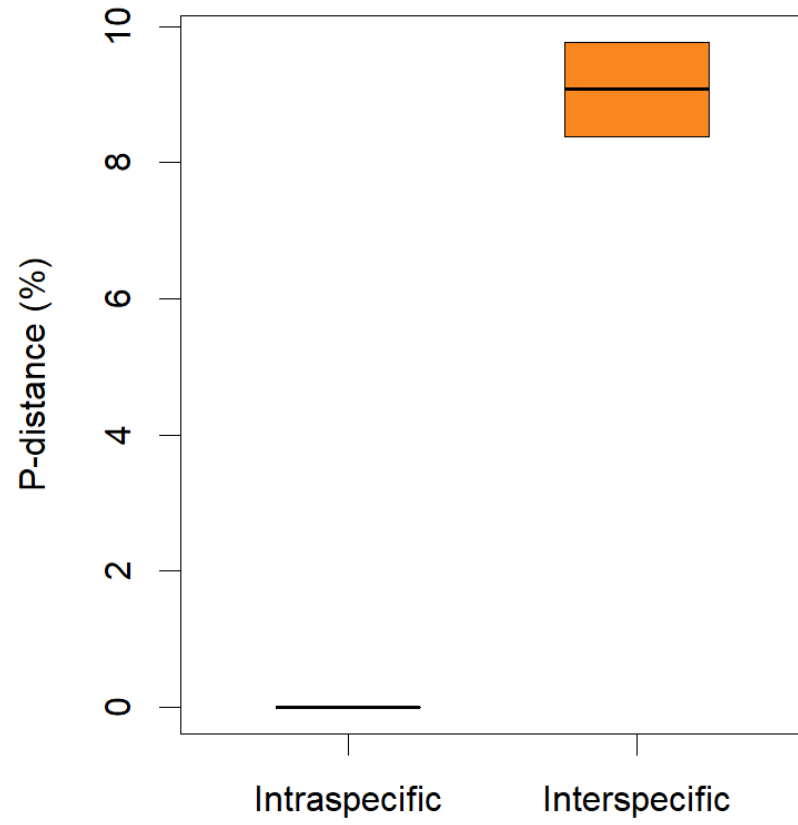

*Biastes*

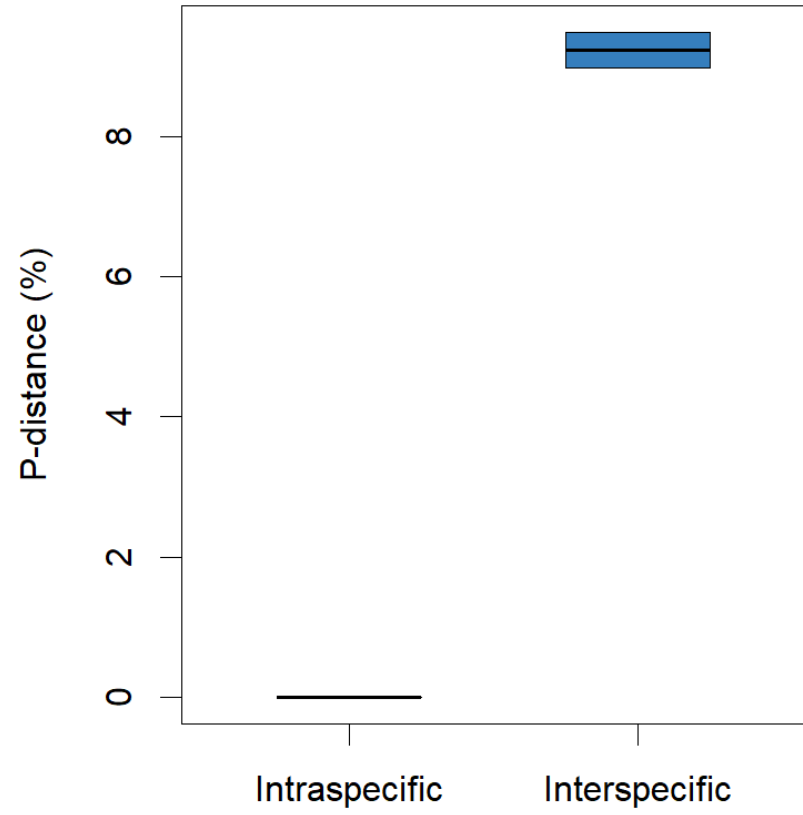



*Bombus*

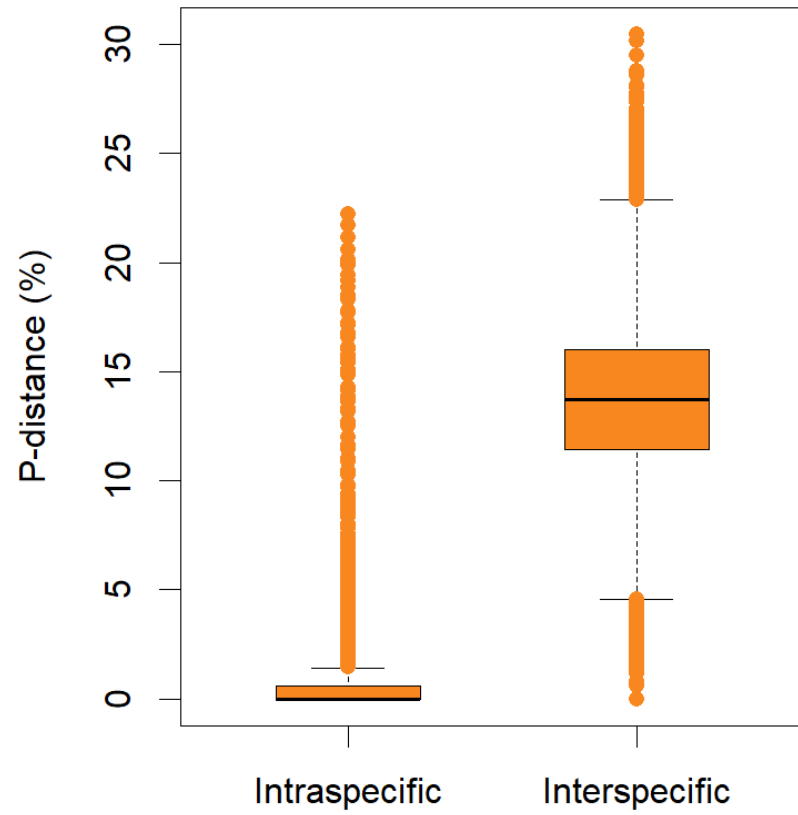

*Bombus*

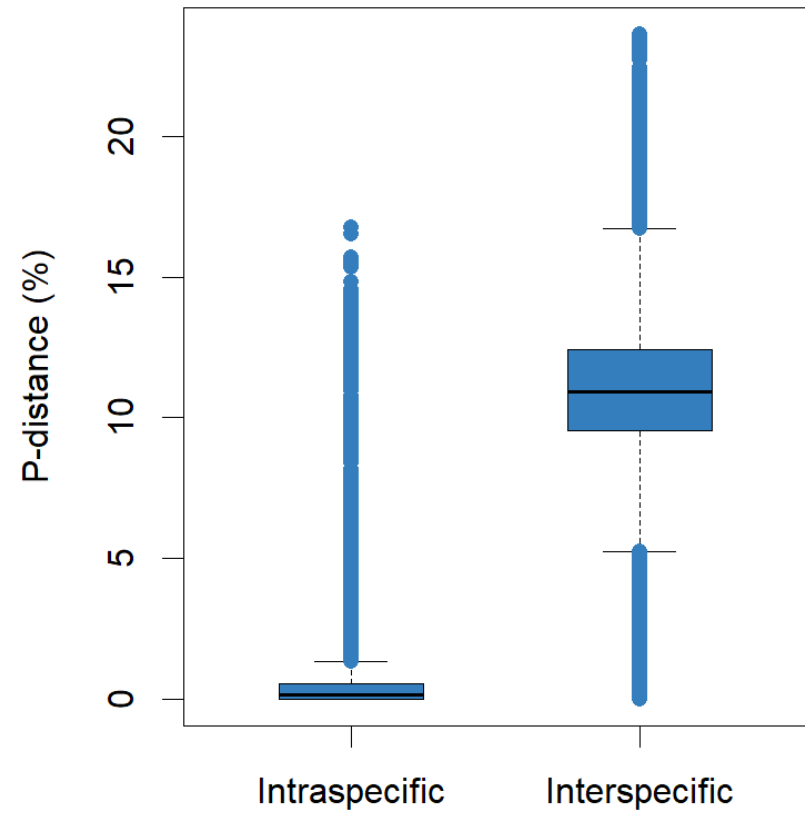

*Bombus (Alpigenobombus)*

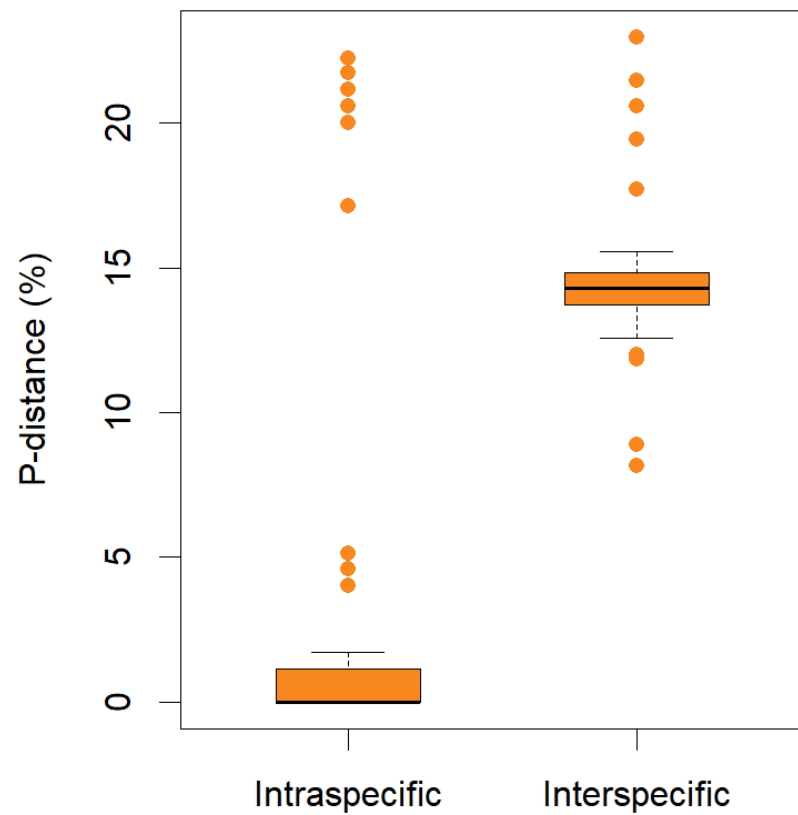

*Bombus (Alpigenobombus)*

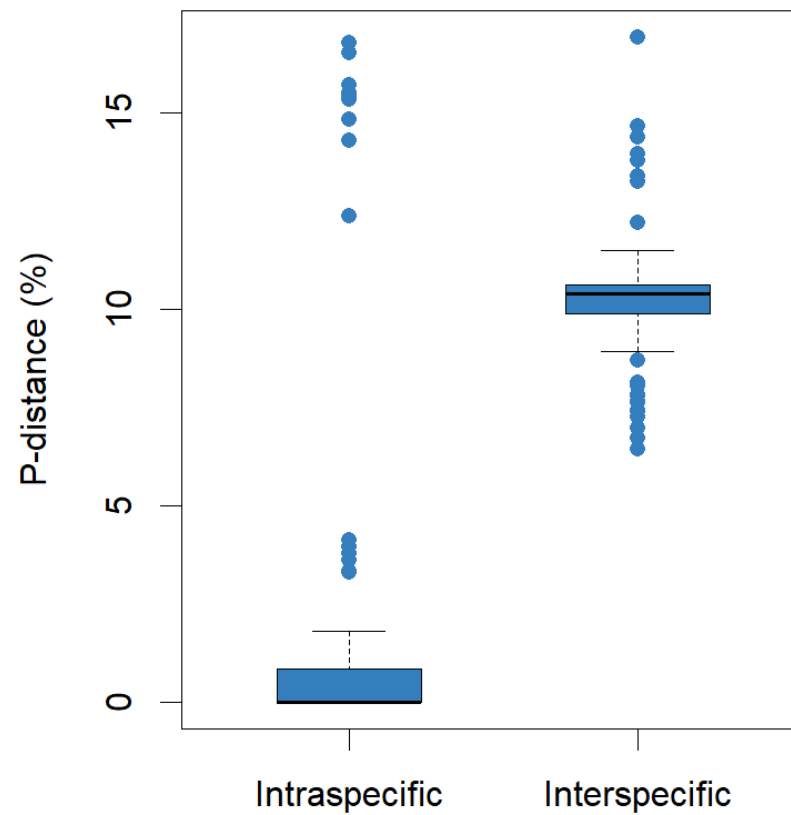

*Bombus (Alpinobombus)*

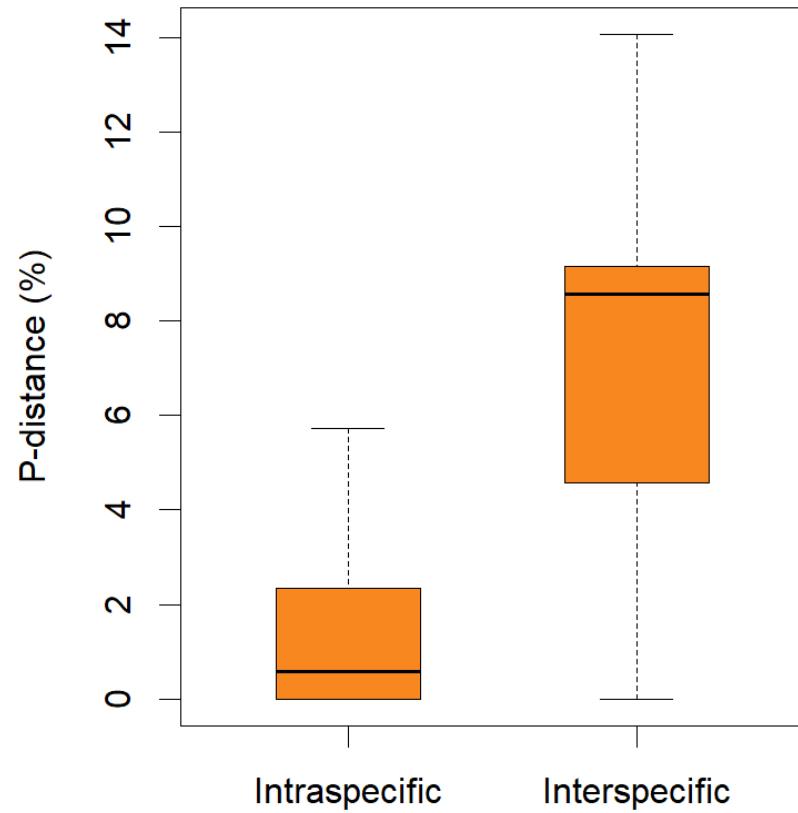

*Bombus (Alpinobombus)*

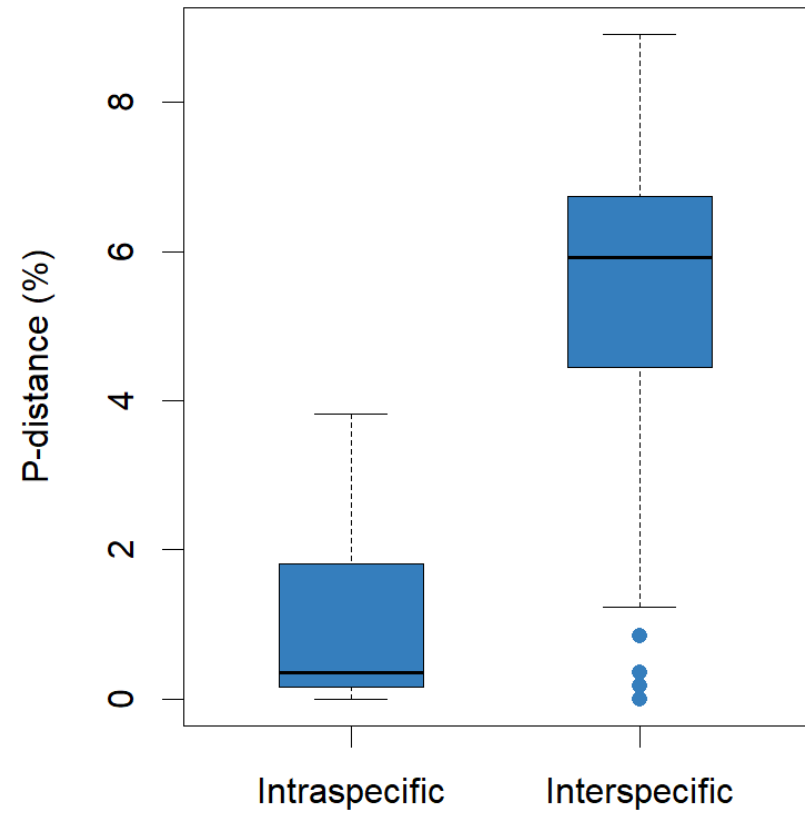

*Bombus (Bombias)*

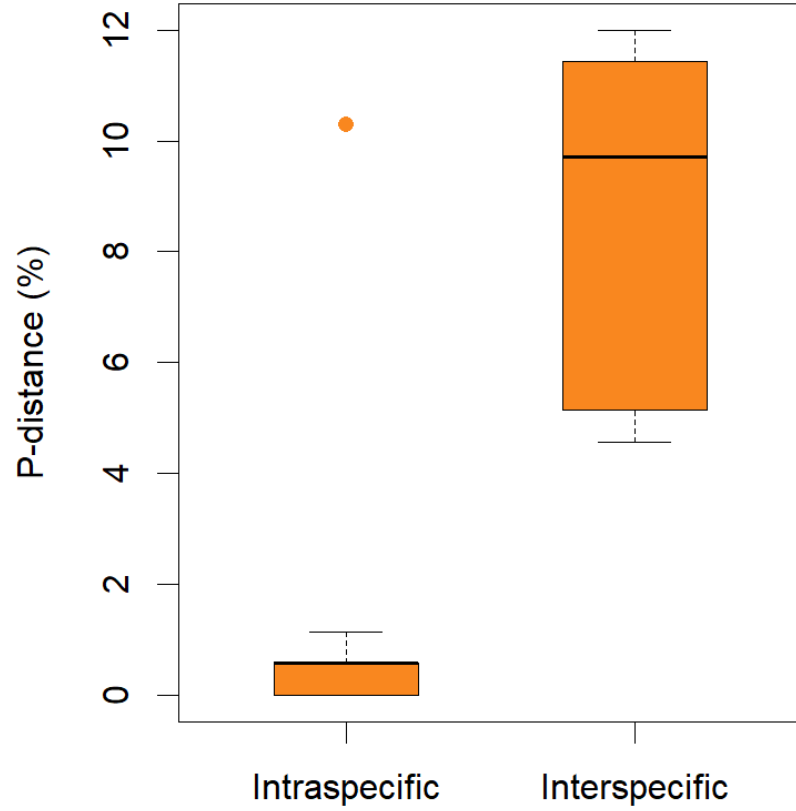

*Bombus (Bombias)*

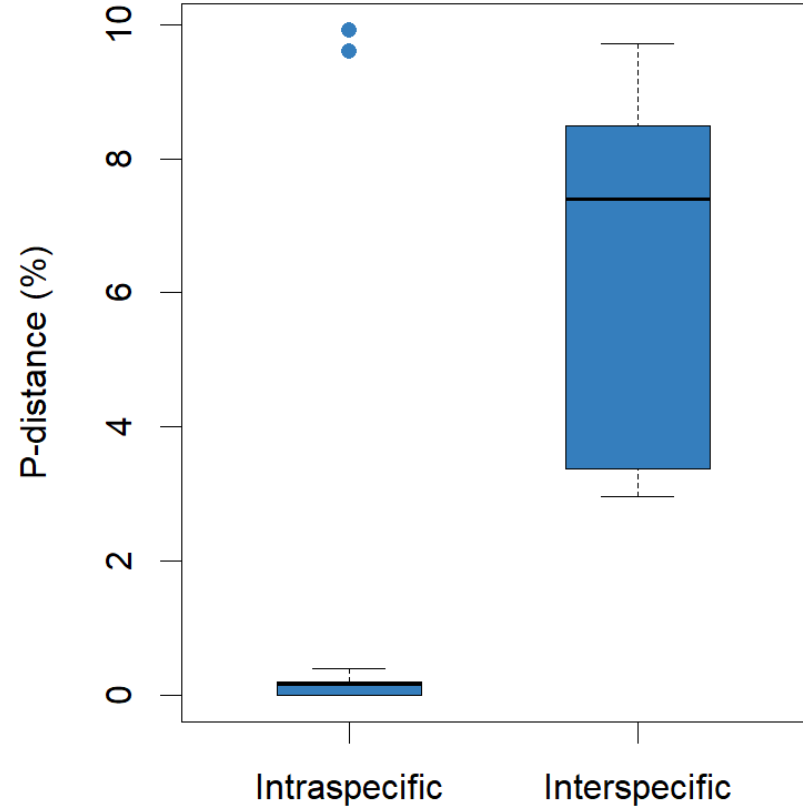

*Bombus (Bombus)*

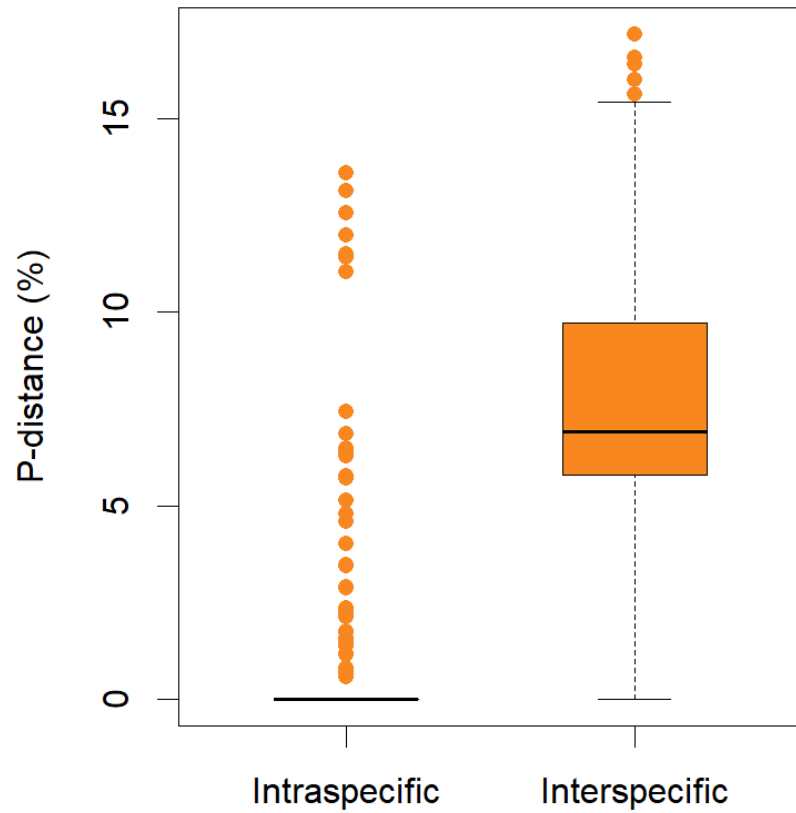

*Bombus (Bombus)*

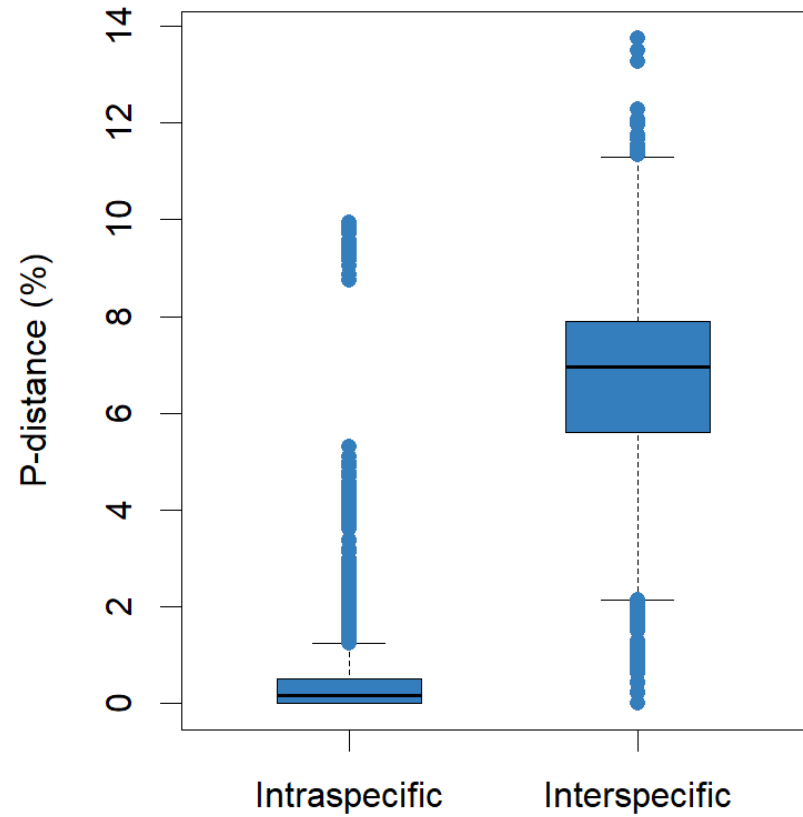

*Bombus (Cullumanobombus)*

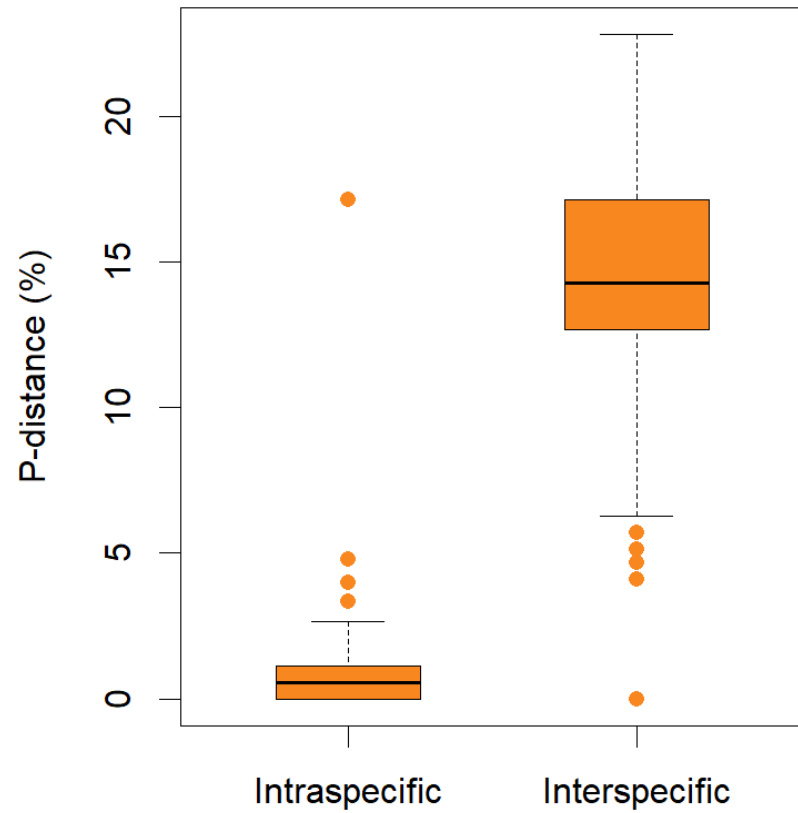

*Bombus (Cullumanobombus)*

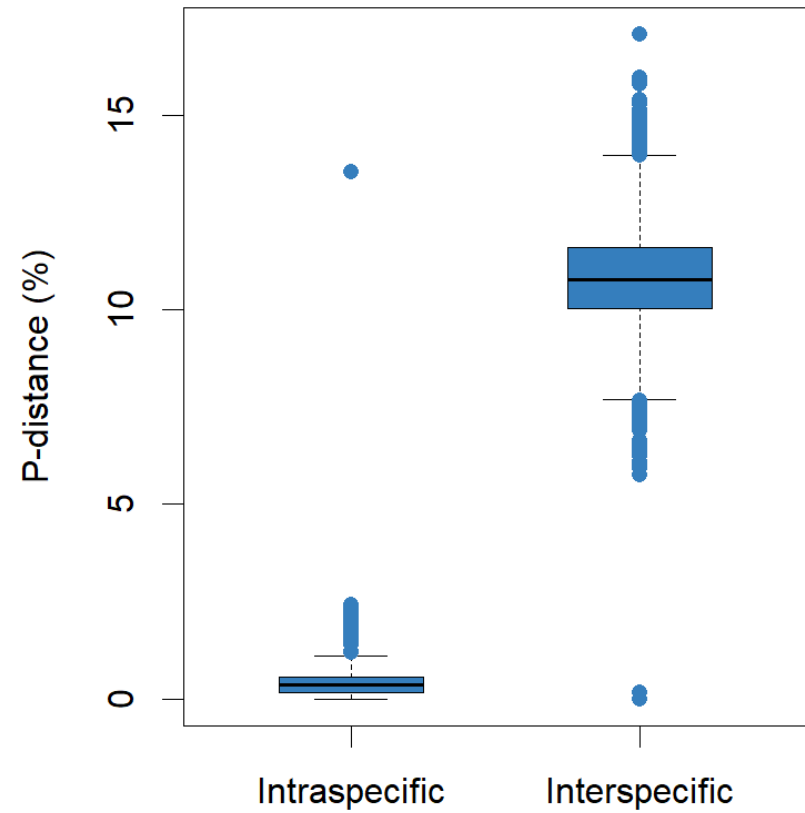

*Bombus (Megabombus)*

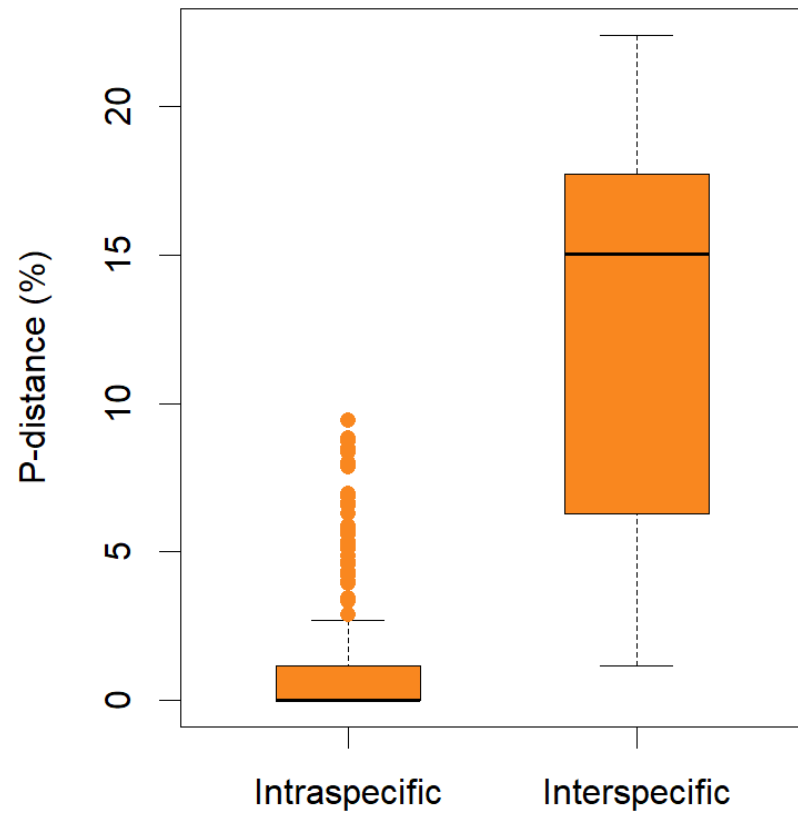

*Bombus (Megabombus)*

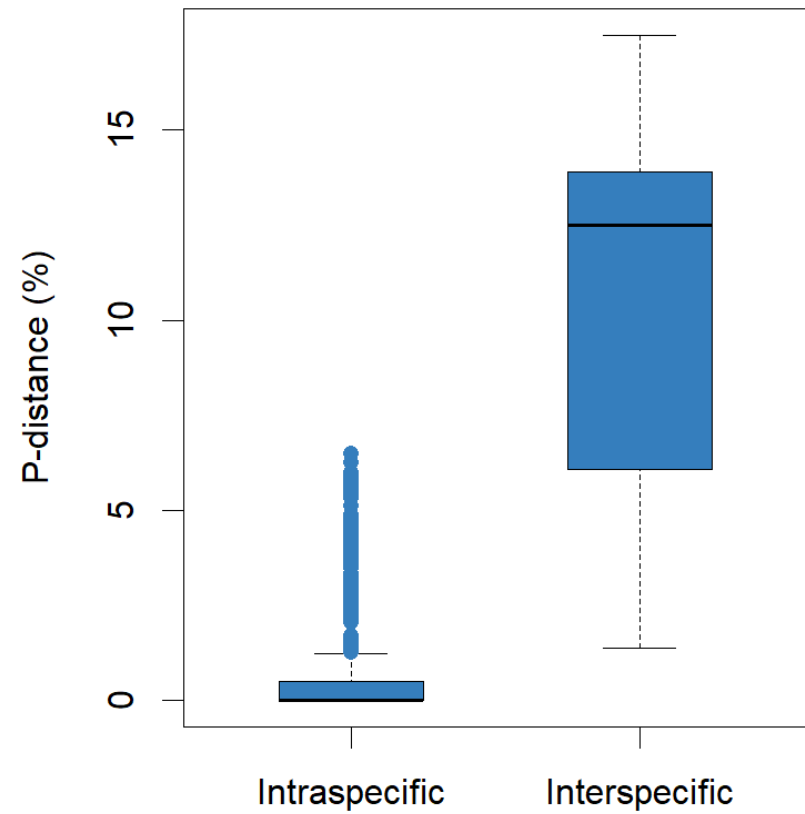

*Bombus (Melanobombus)*

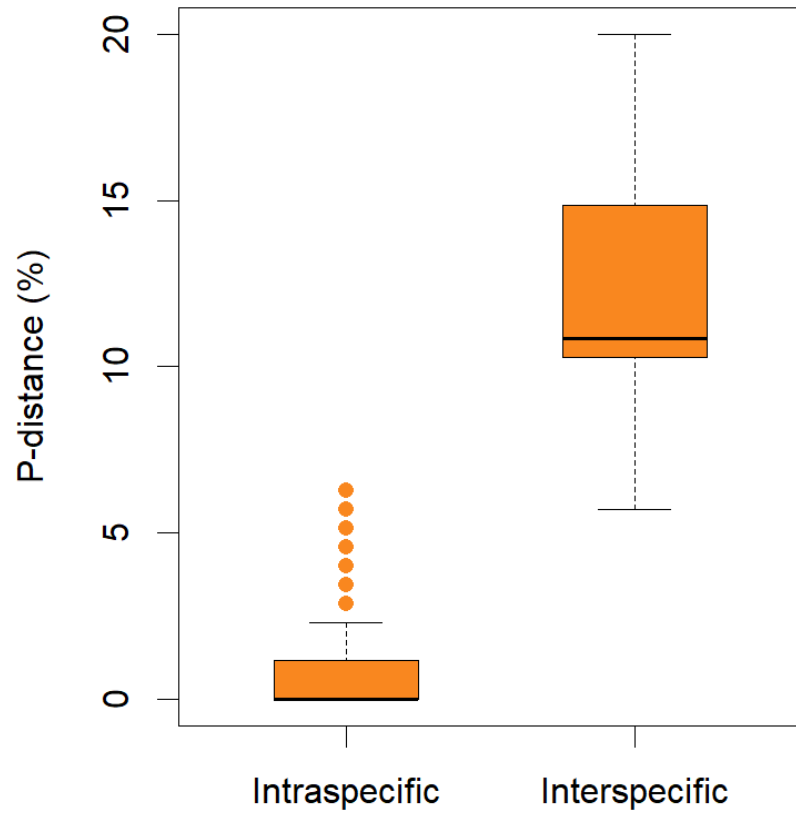

*Bombus (Melanobombus)*

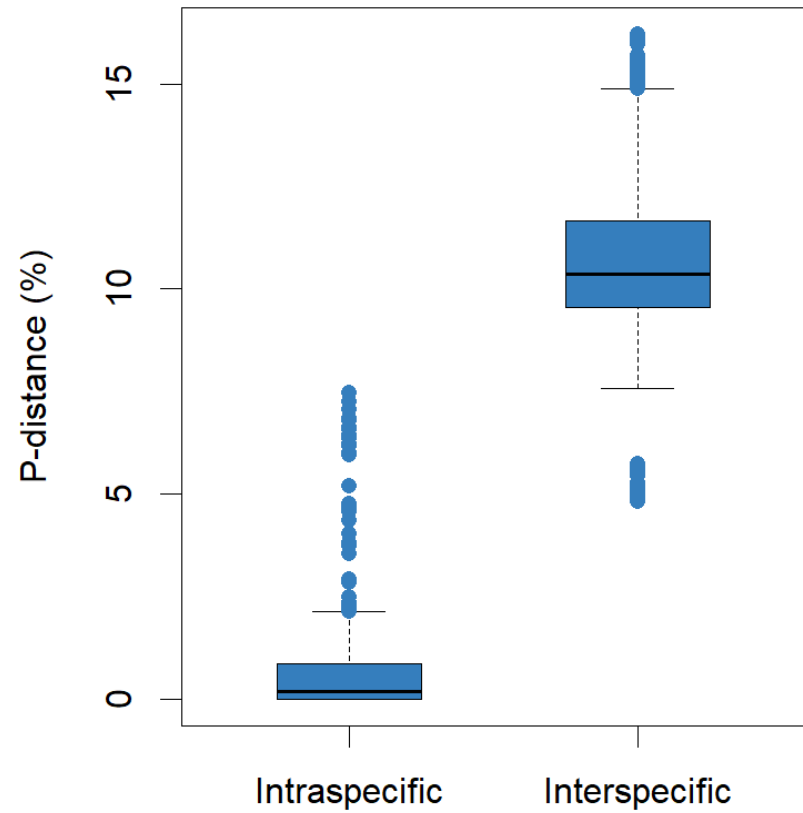



*Bombus (Mendacibombus)*

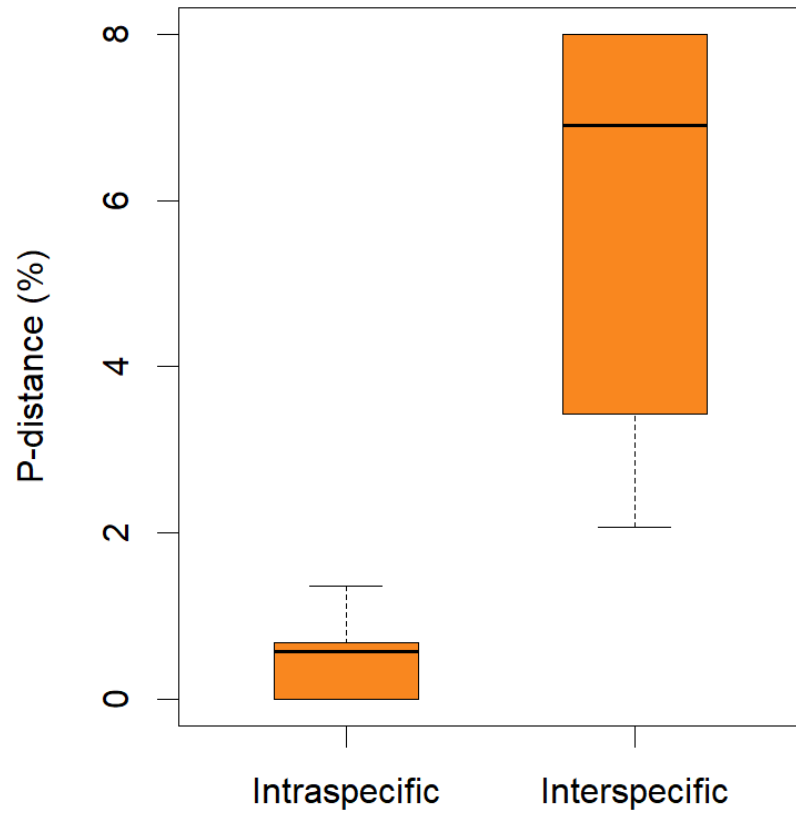

*Bombus (Mendacibombus)*

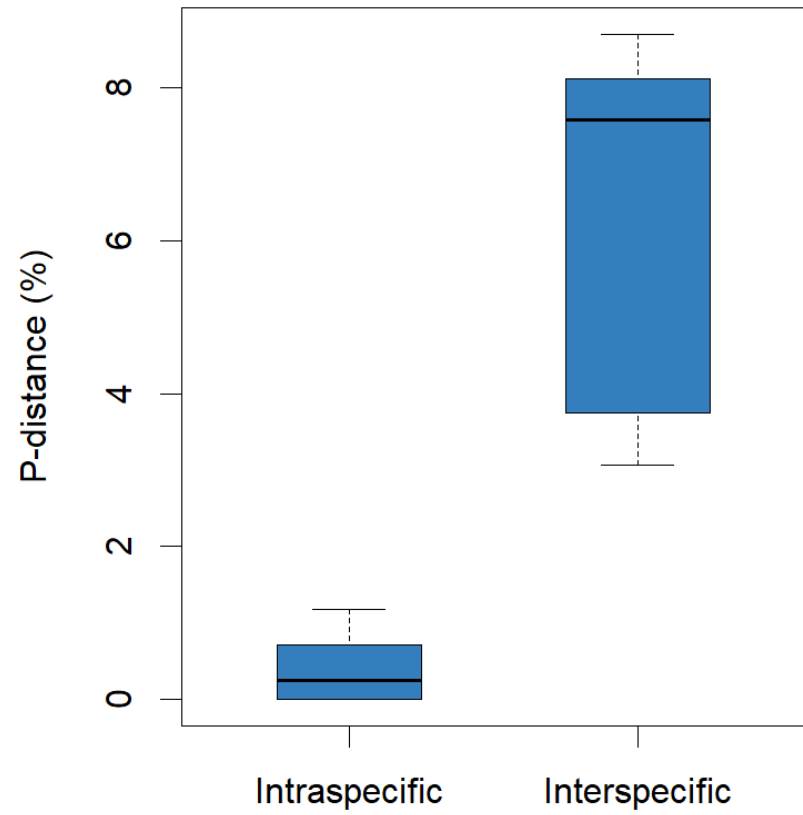

*Bombus (Orientalibombus)*

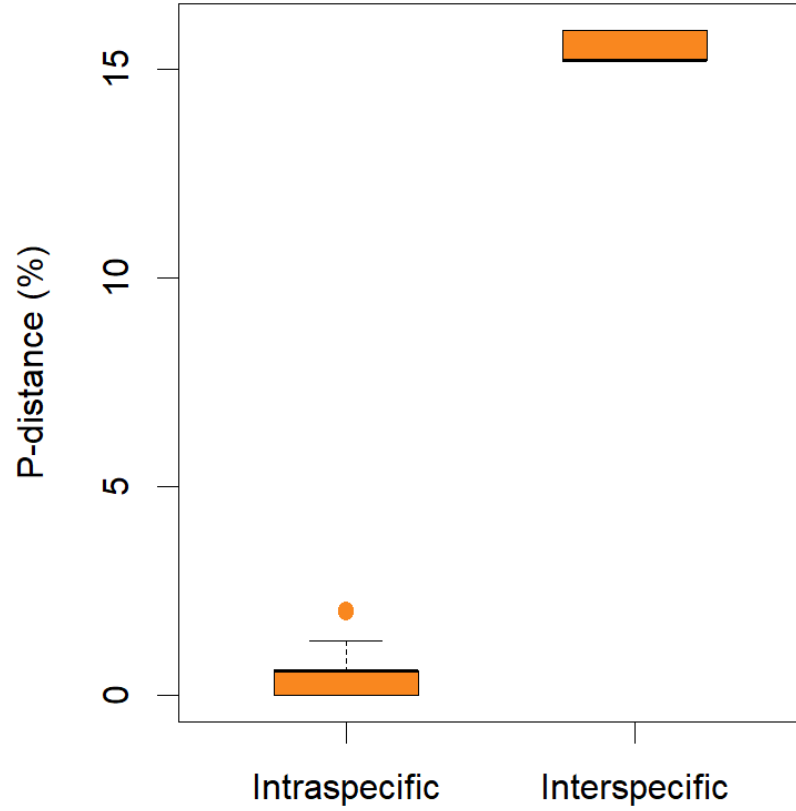

*Bombus (Orientalibombus)*

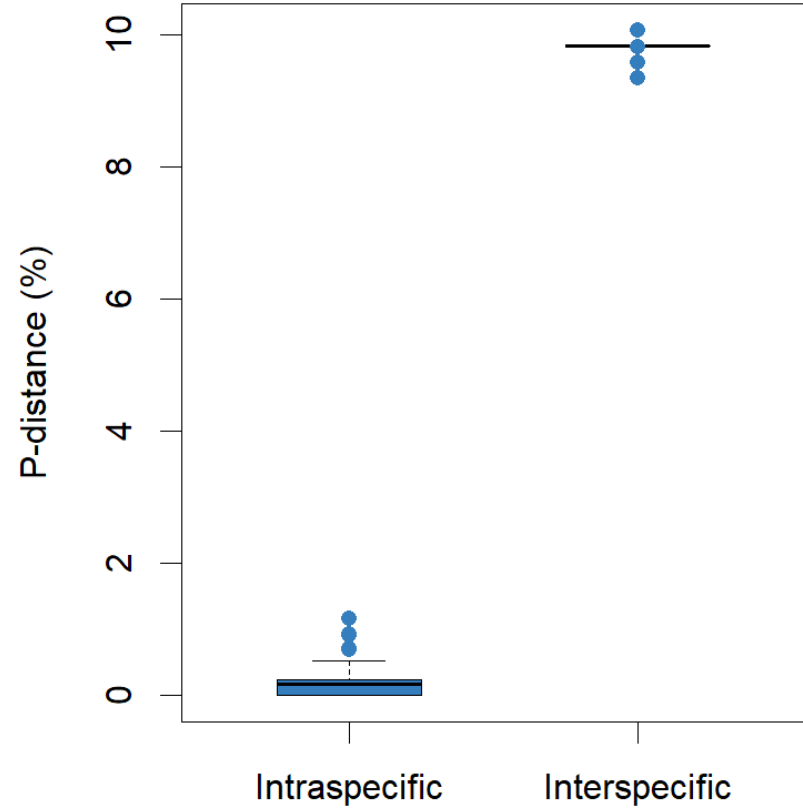

*Bombus (Psithyrus)*

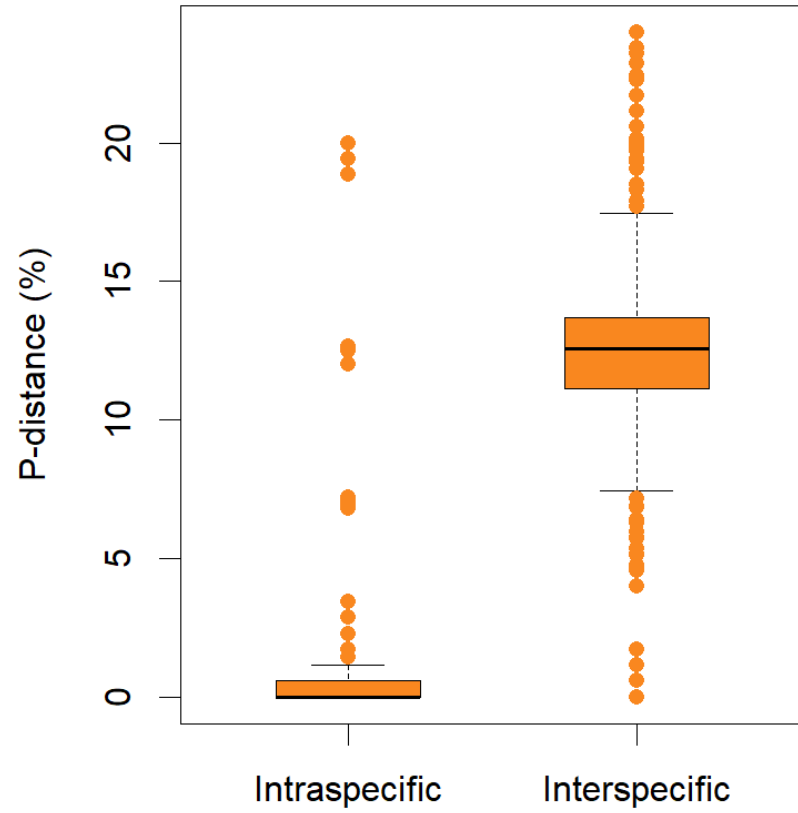

*Bombus (Psithyrus)*

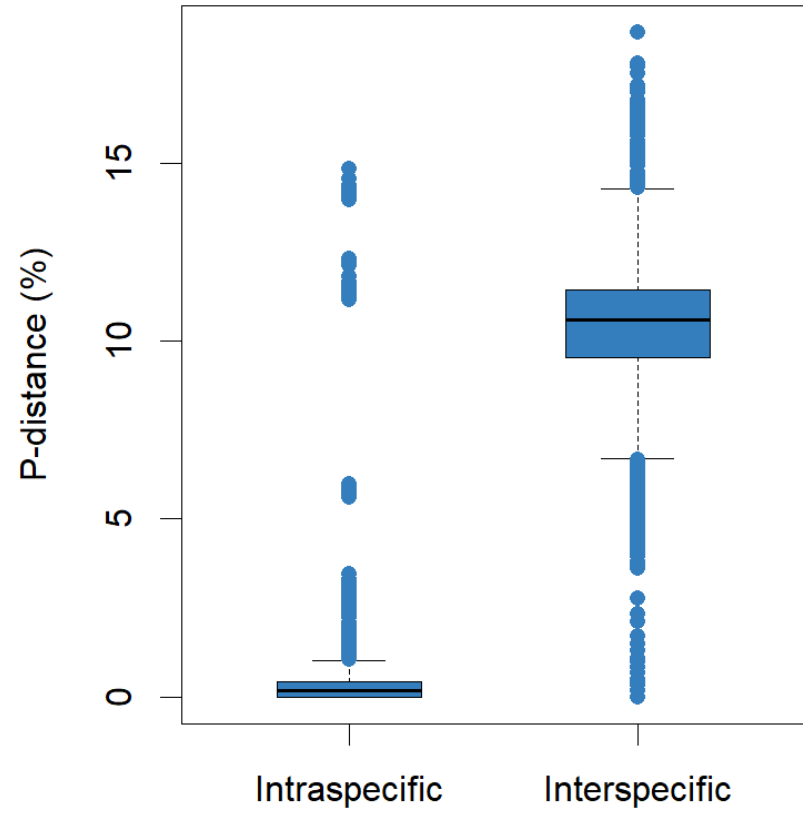

*Bombus (Pyrobombus)*

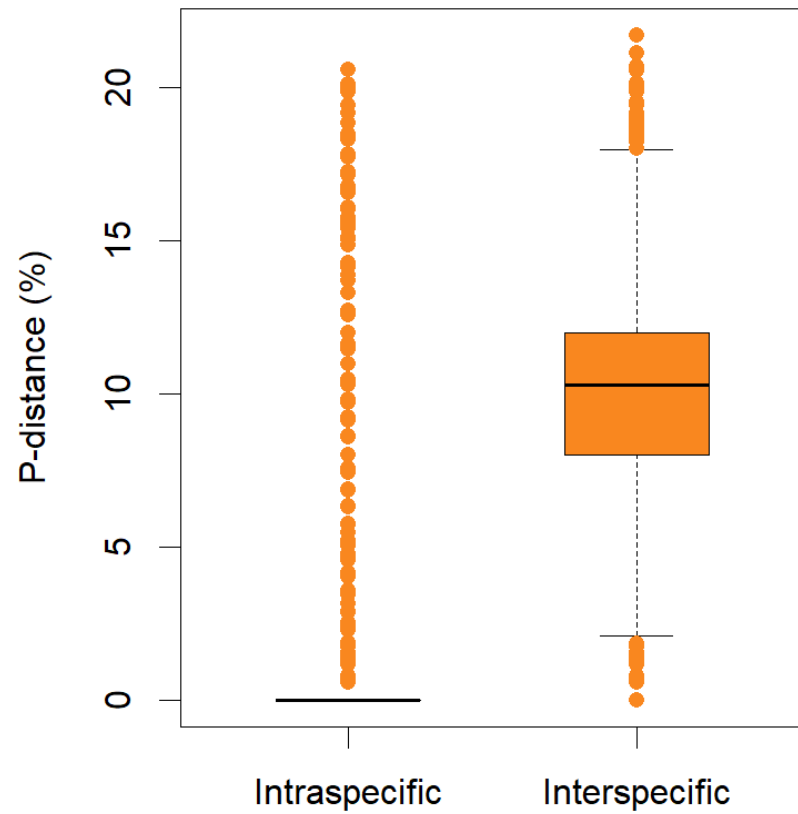

*Bombus (Pyrobombus)*

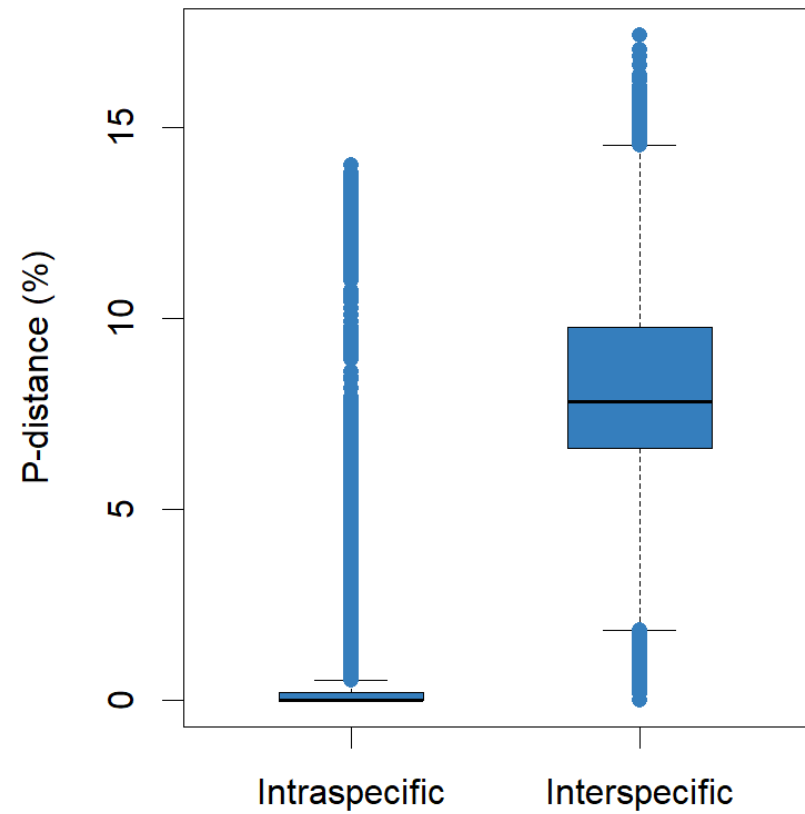

*Bombus (Subterraneobombus)*

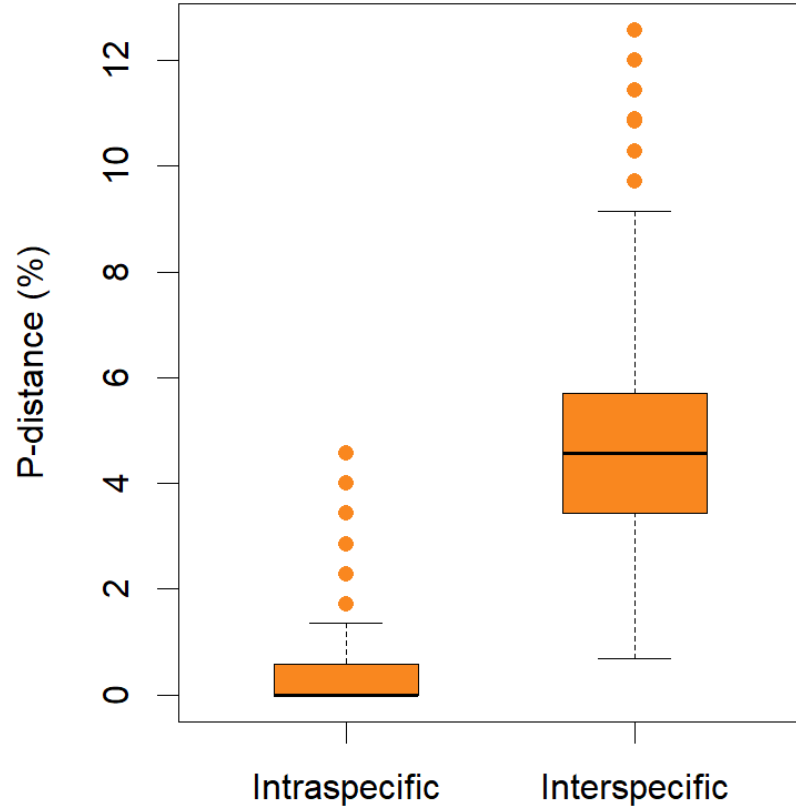

*Bombus (Subterraneobombus)*

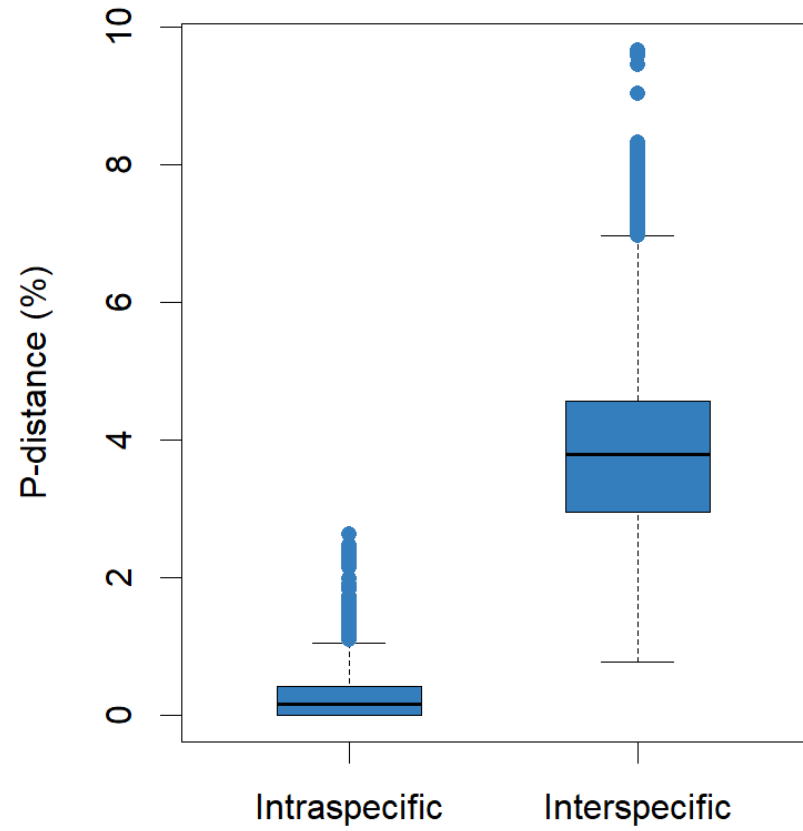

*Bombus (Thoracobombus)*

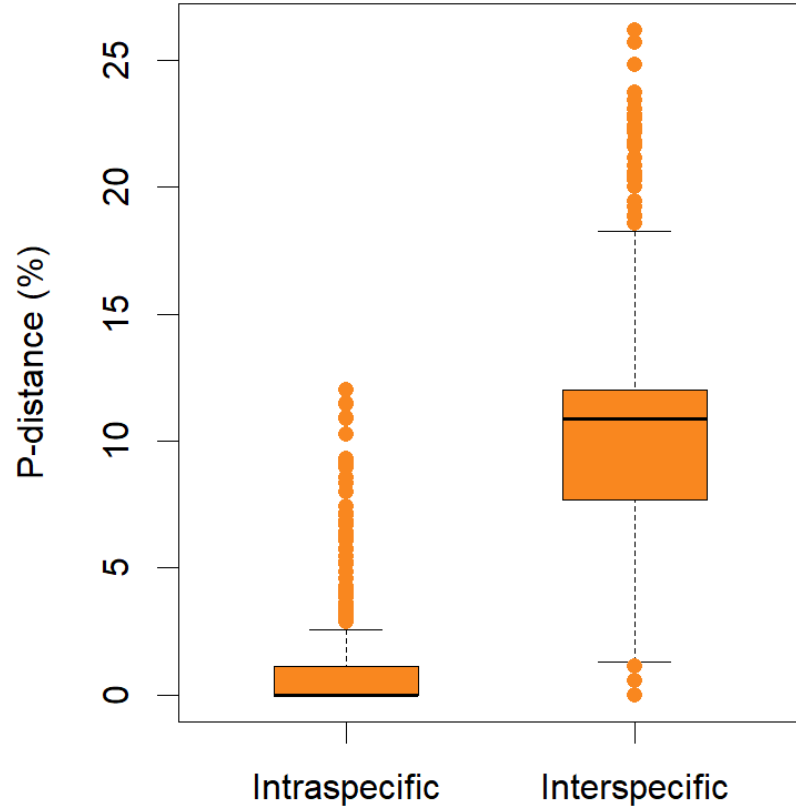

*Bombus (Thoracobombus)*

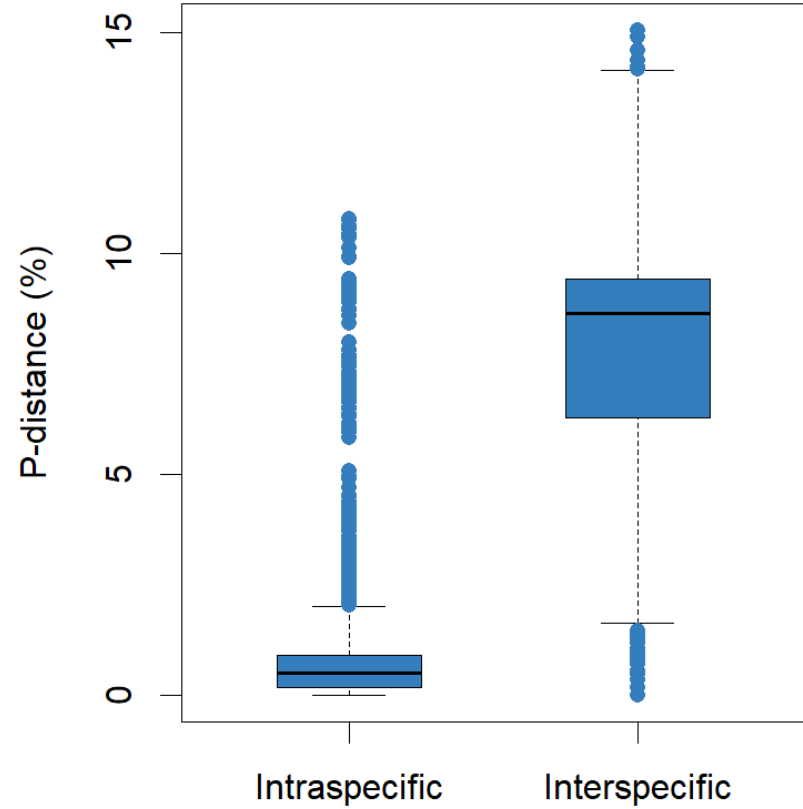

*Braunsapis*

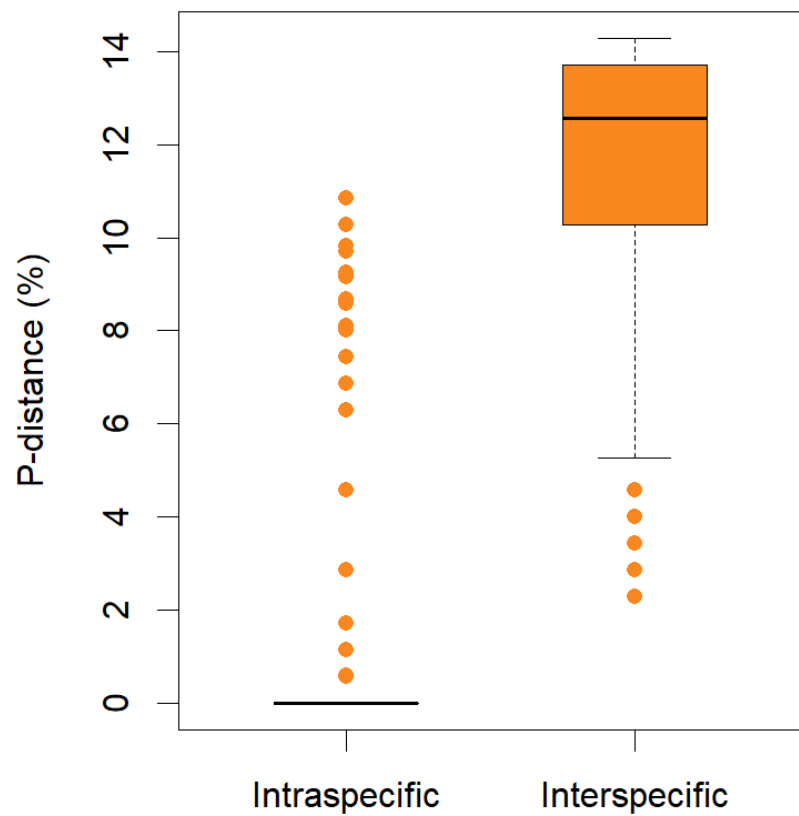

*Braunsapis*

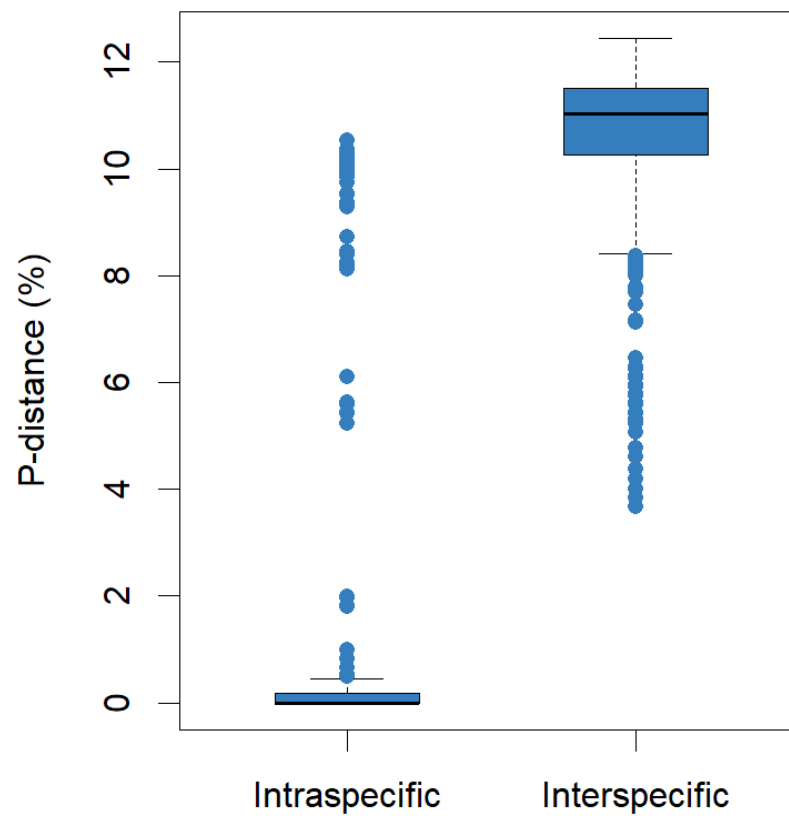

*Caenonomada*

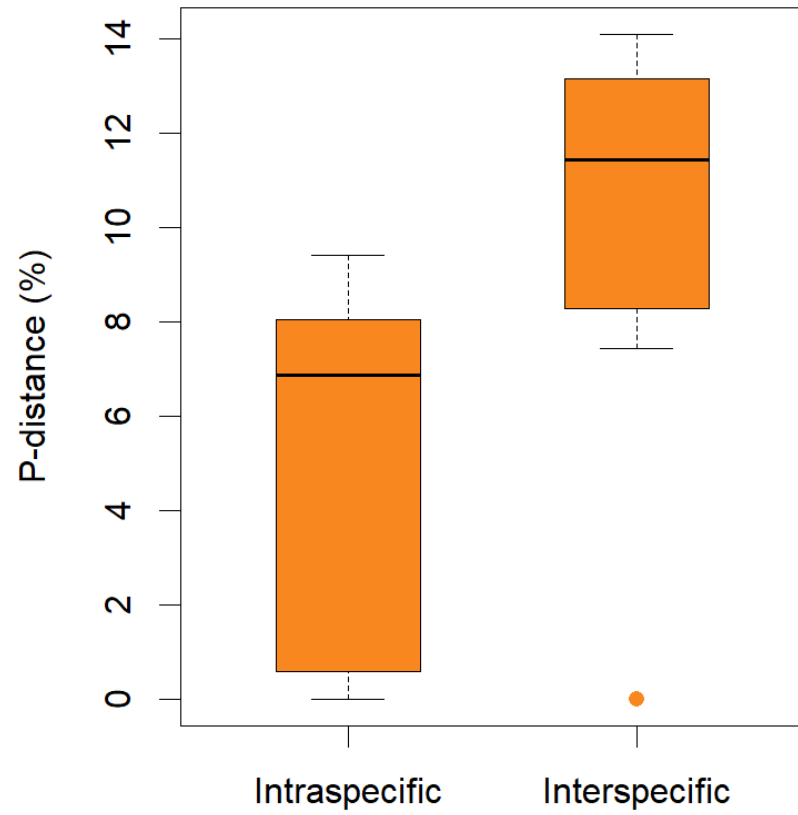

*Caenonomada*

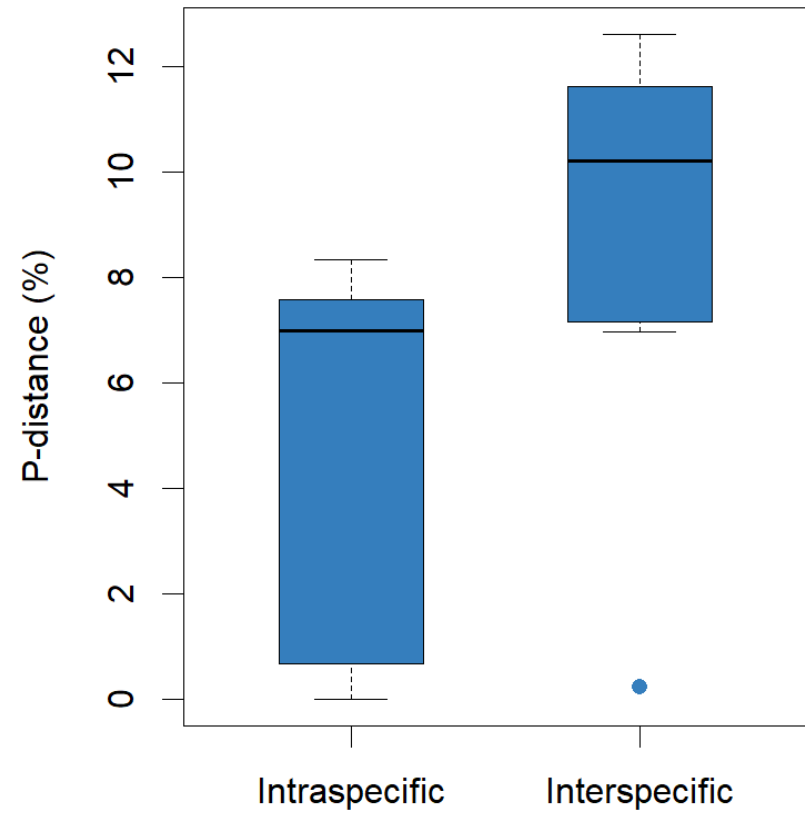



*Centris*

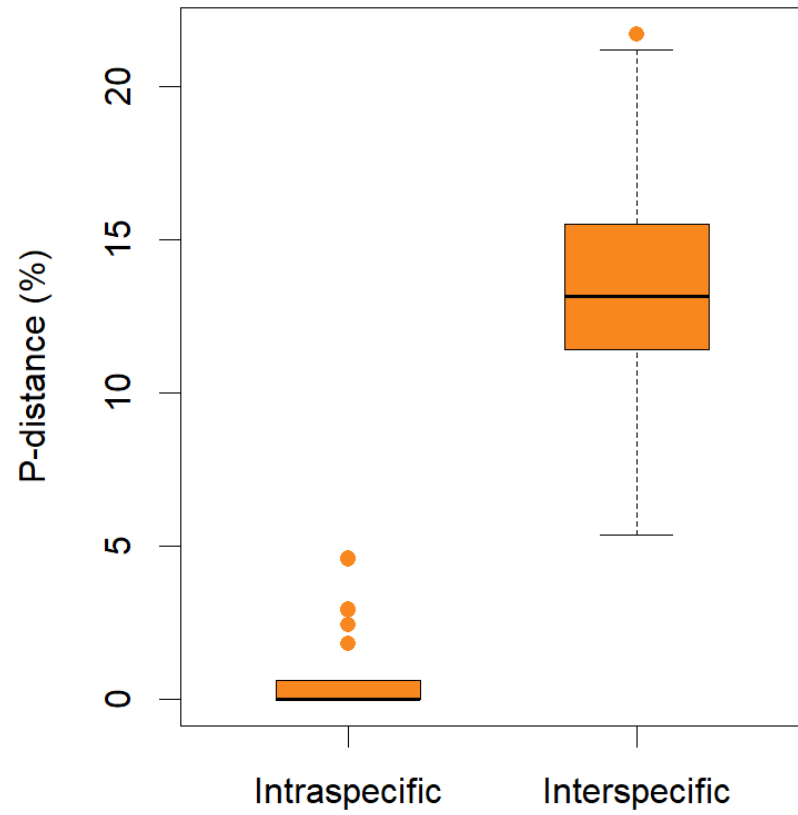

*Centris*

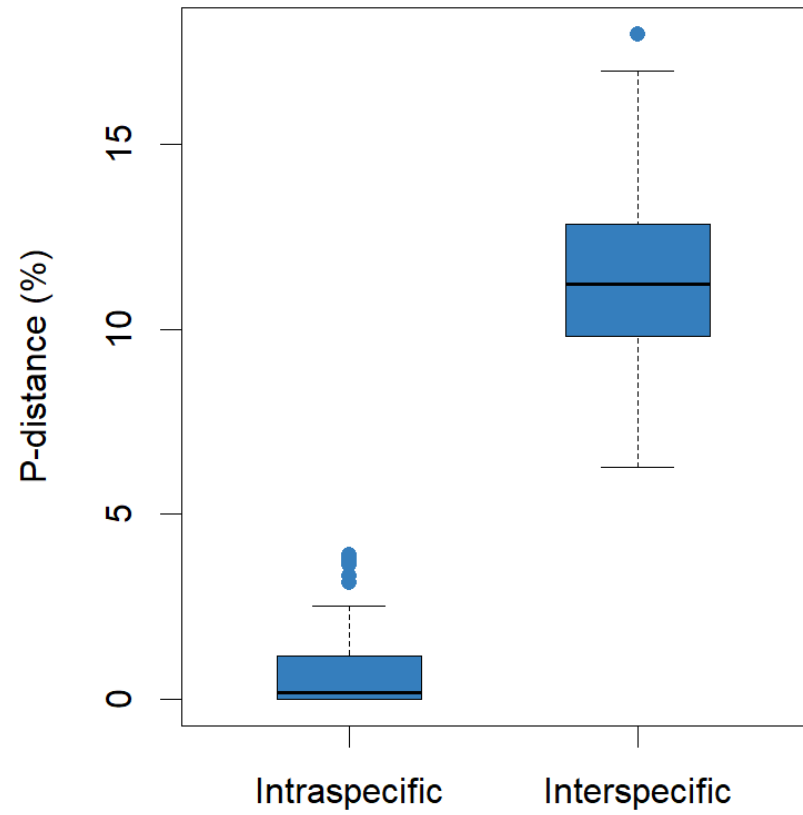

*Cephalotrigona*

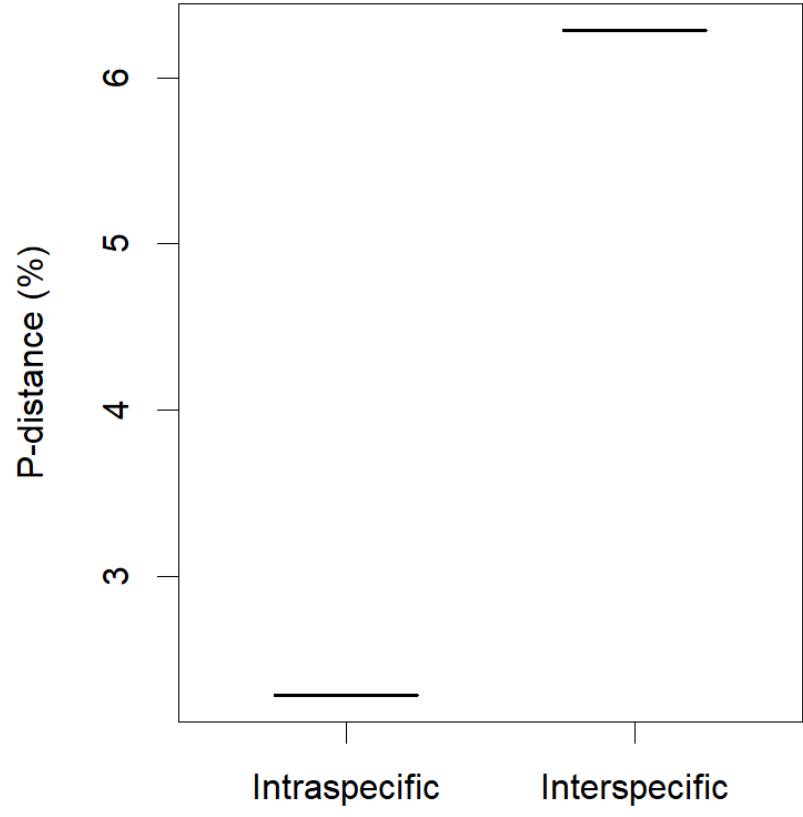

*Cephalotrigona*

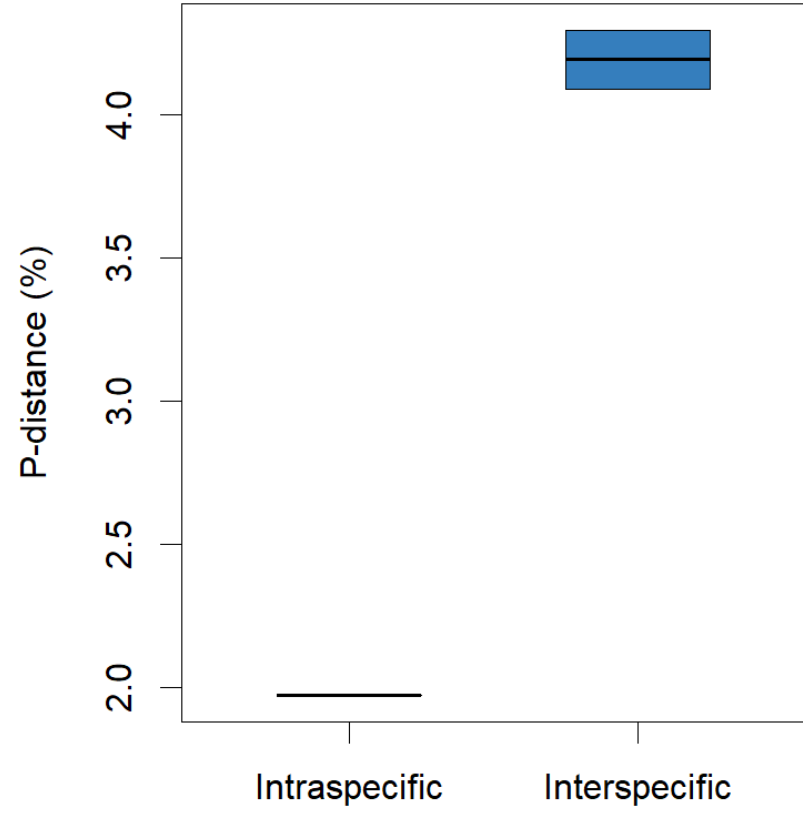

*Ceratina*

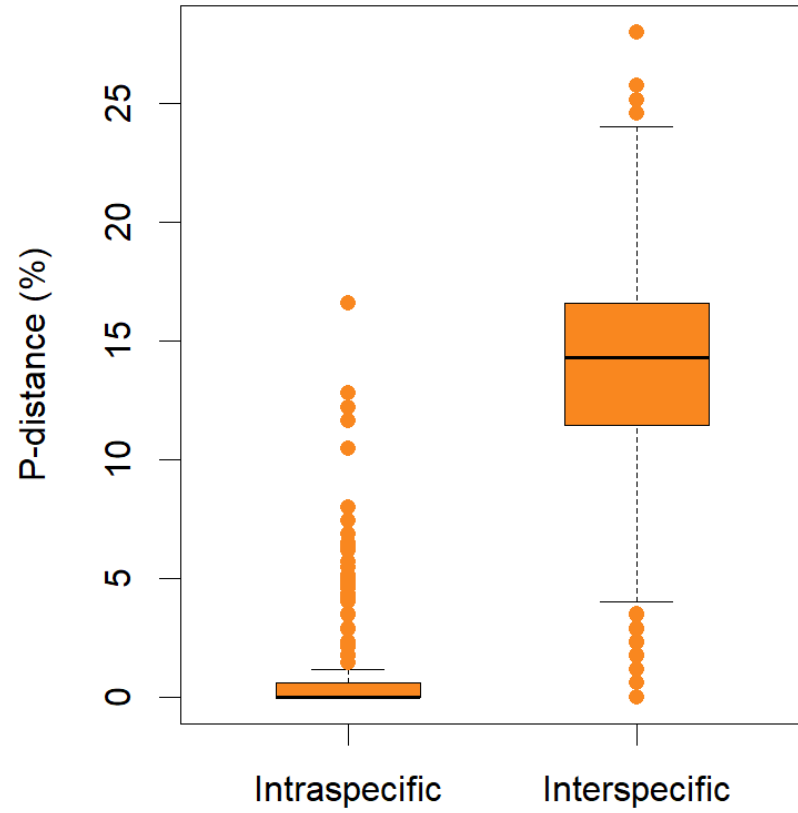

*Ceratina*

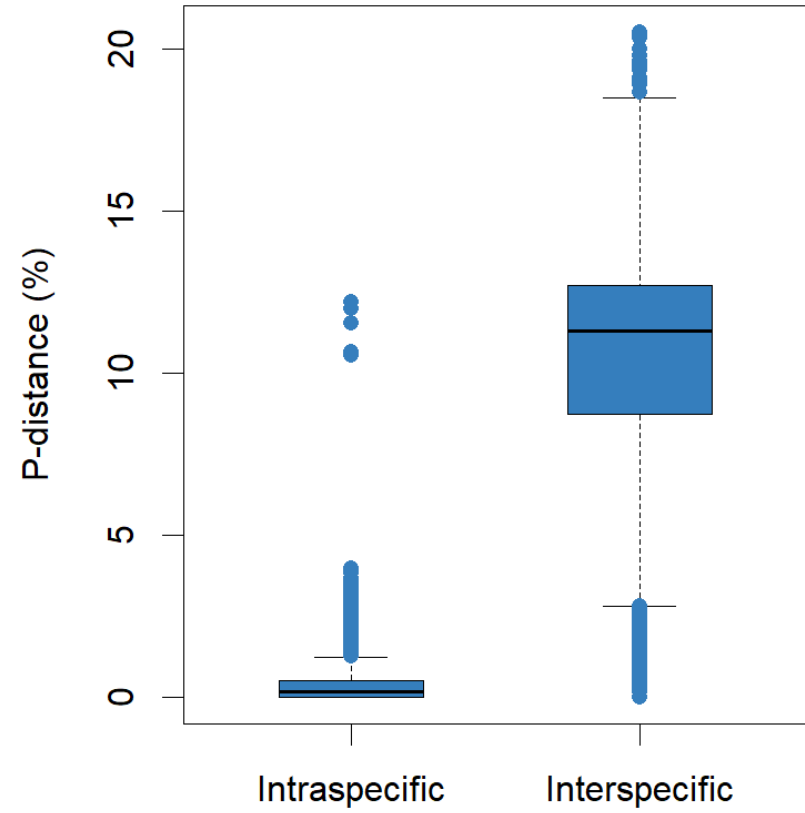

*Chalepogenus*

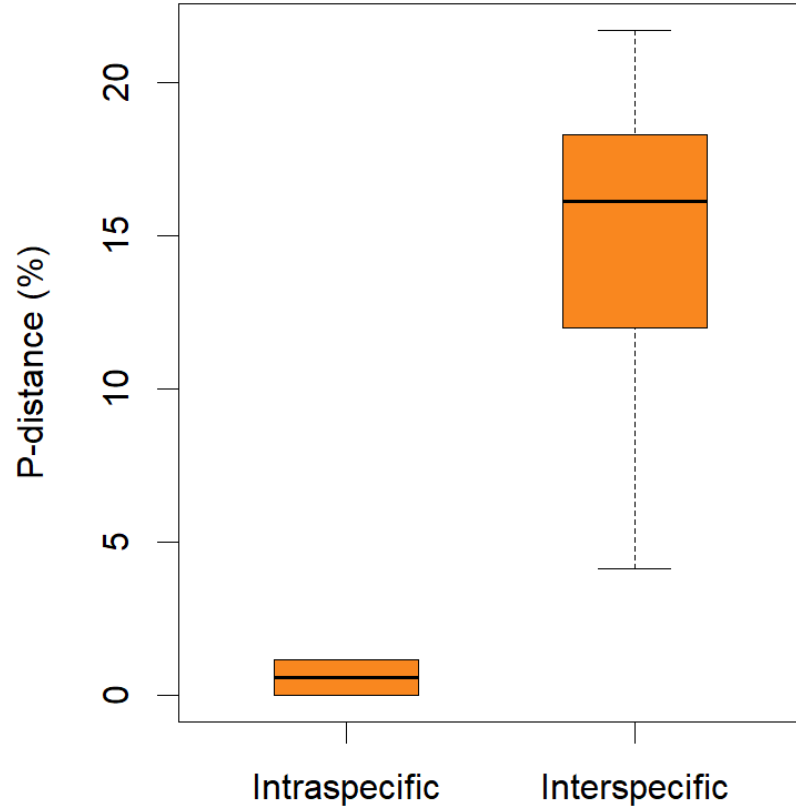

*Chalepogenus*

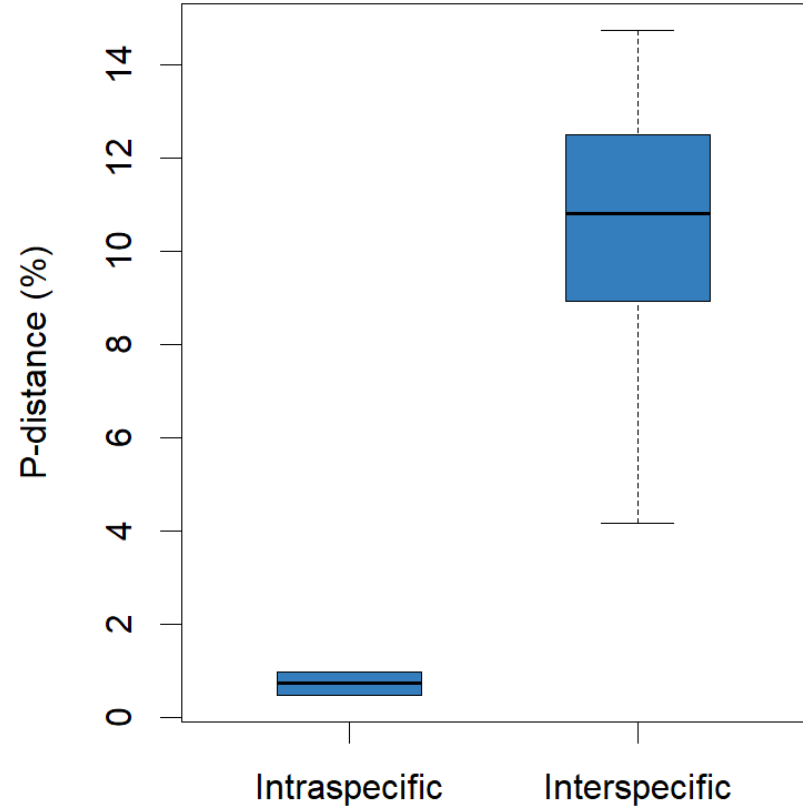

*Ctenoplectra*

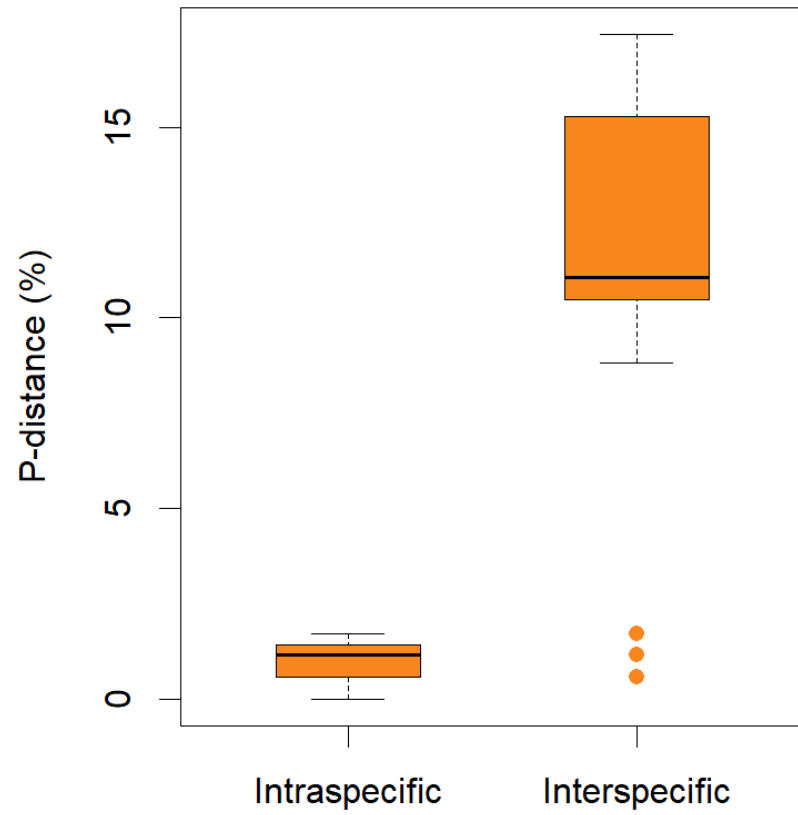

*Ctenoplectra*

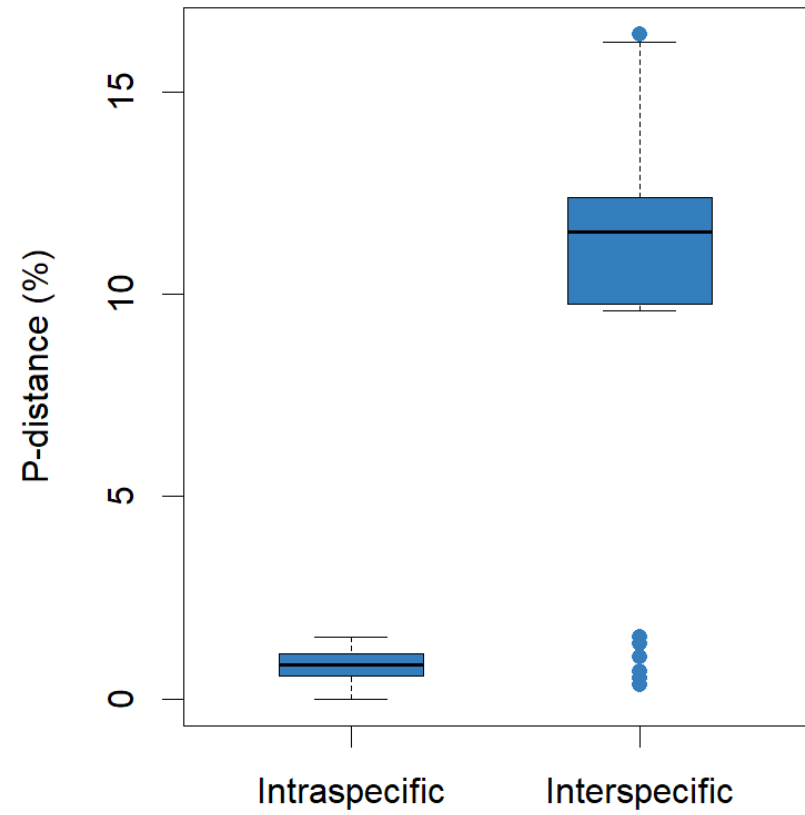

*Diadasia*

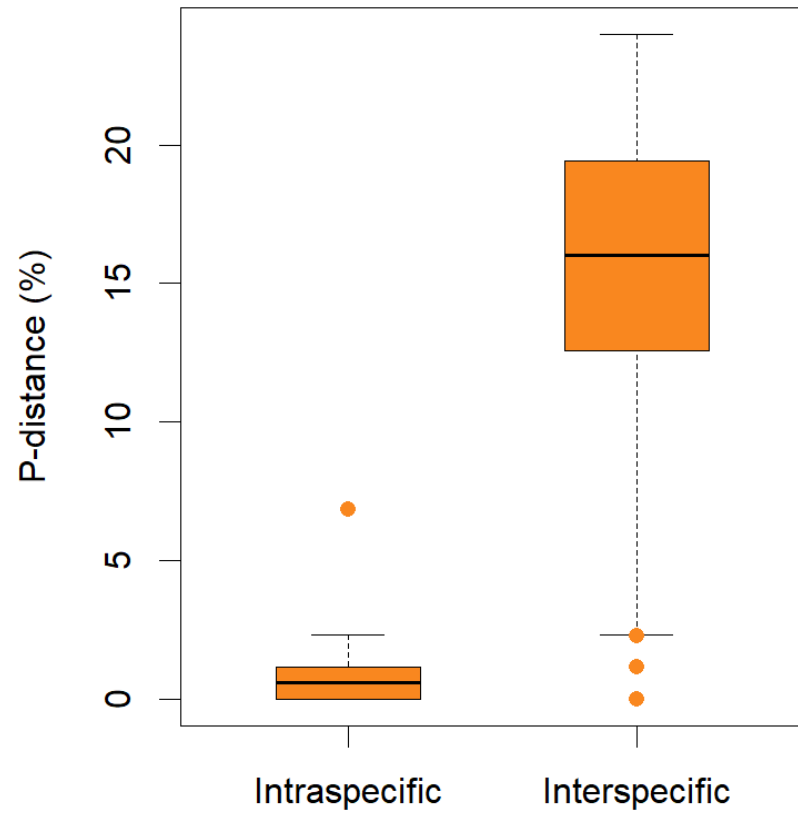

*Diadasia*

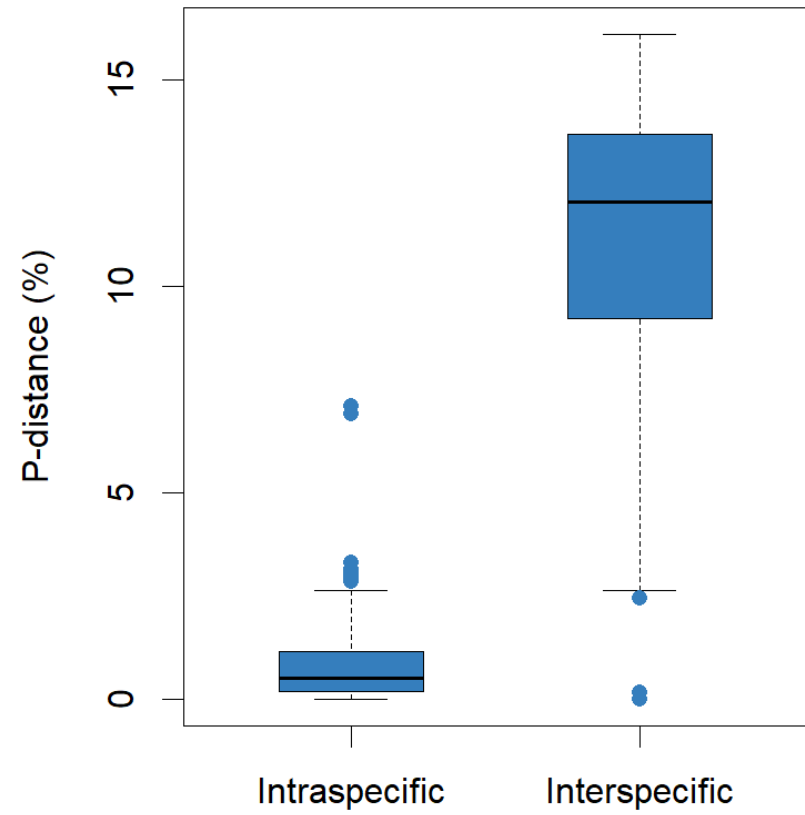

*Epeoloides*

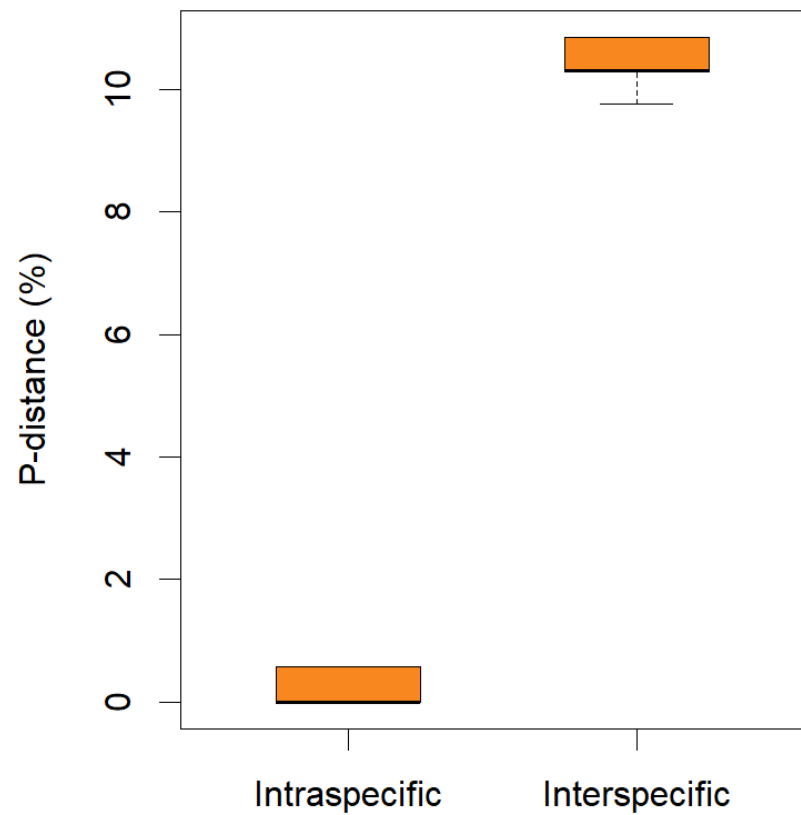

*Epeoloides*

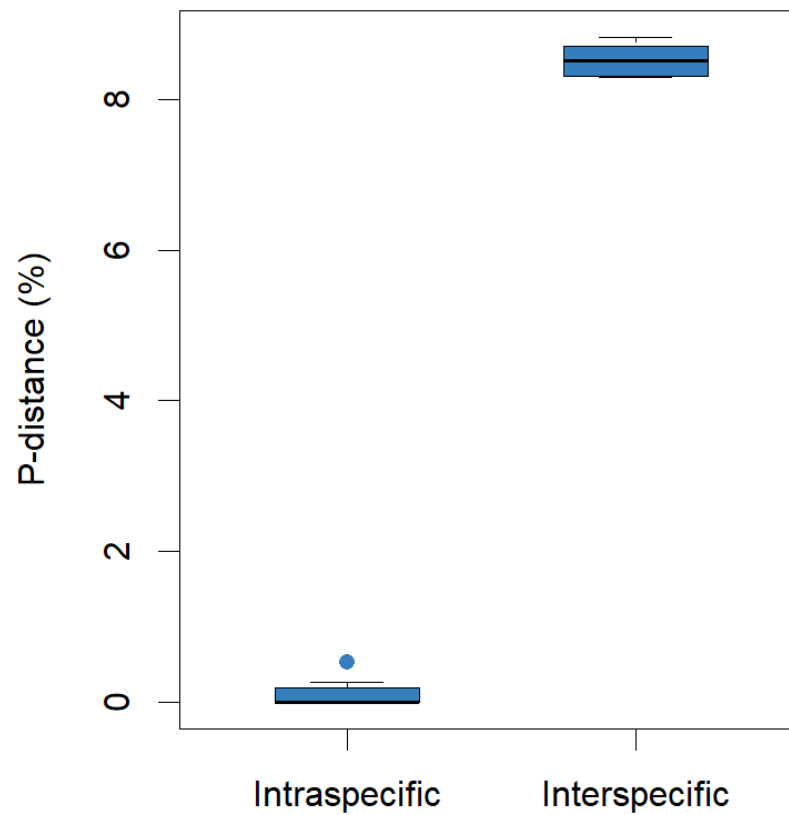

*Epeolus*

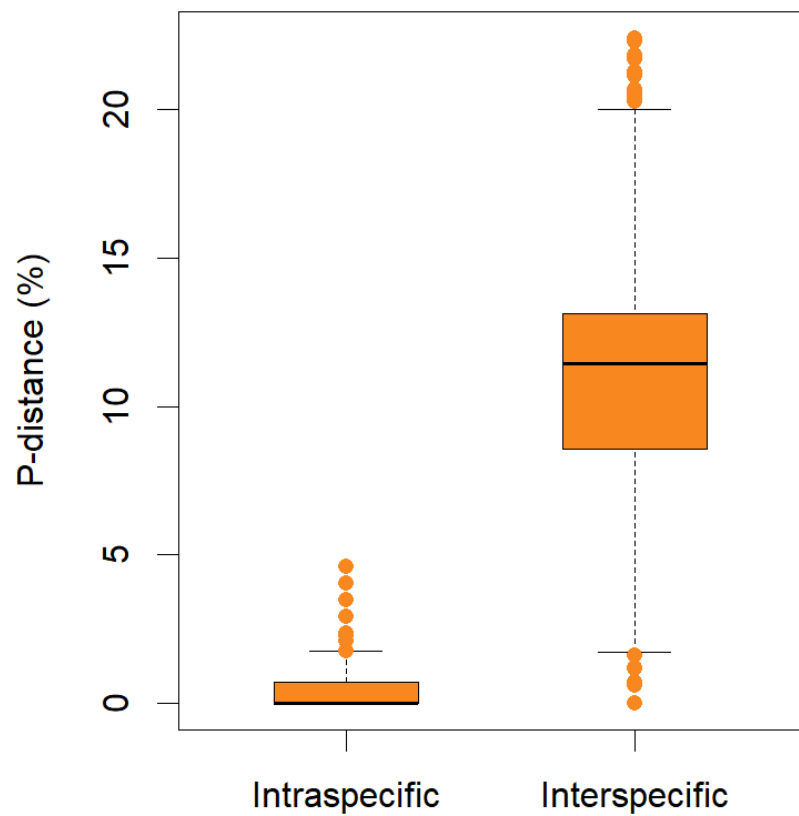

*Epeolus*

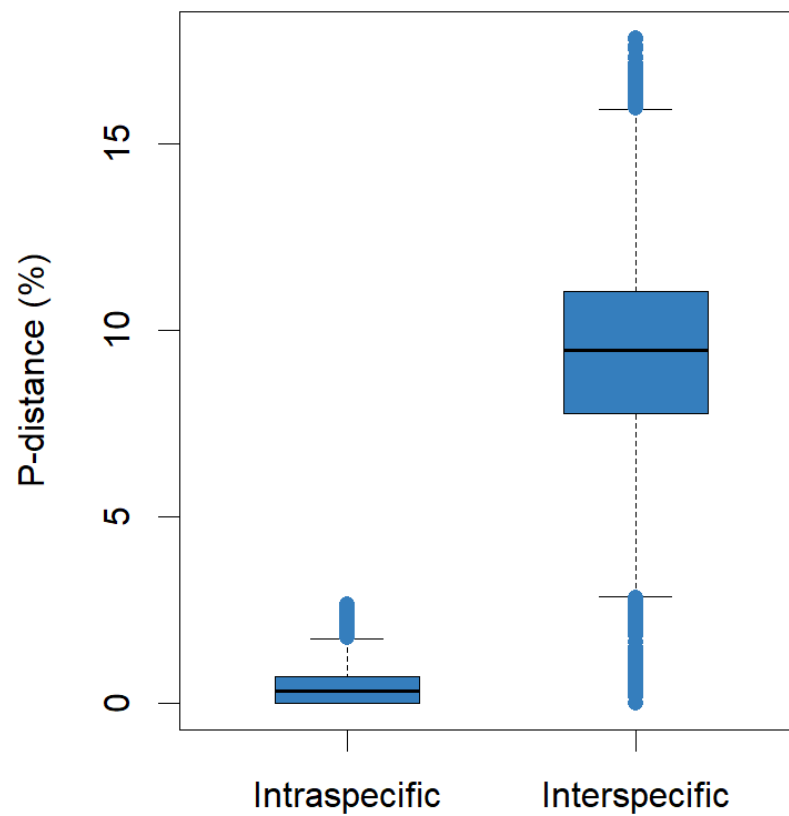



*Epicharis*

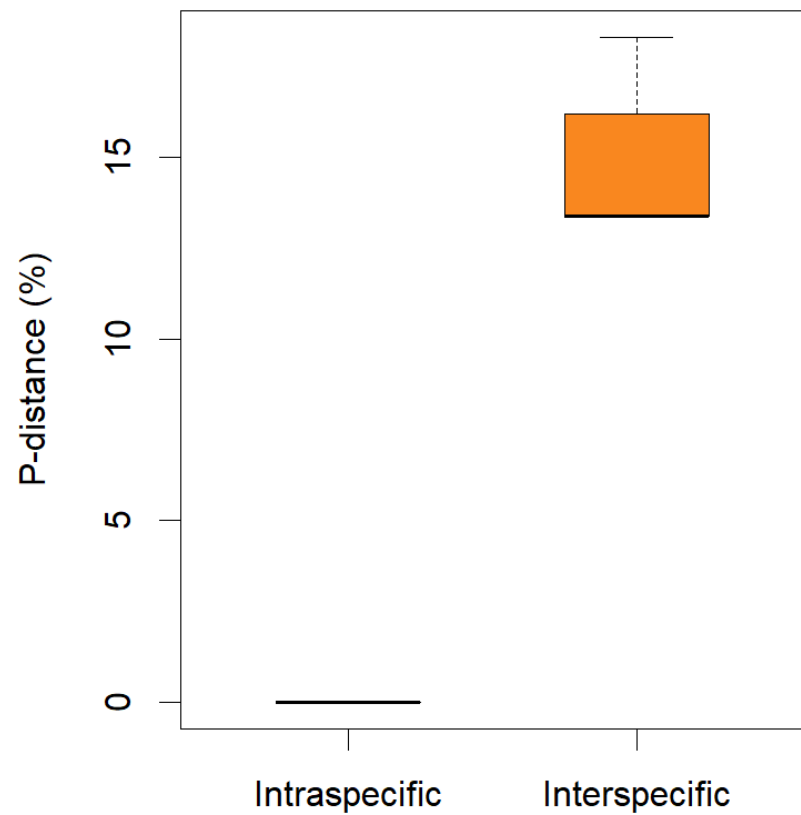

*Epicharis*

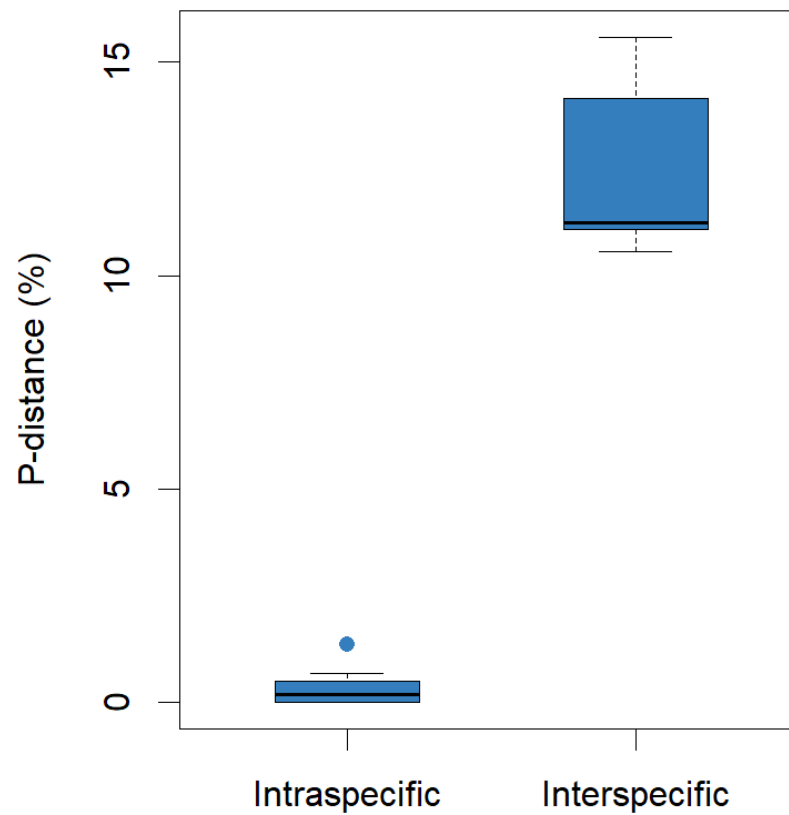

*Ericrocis*

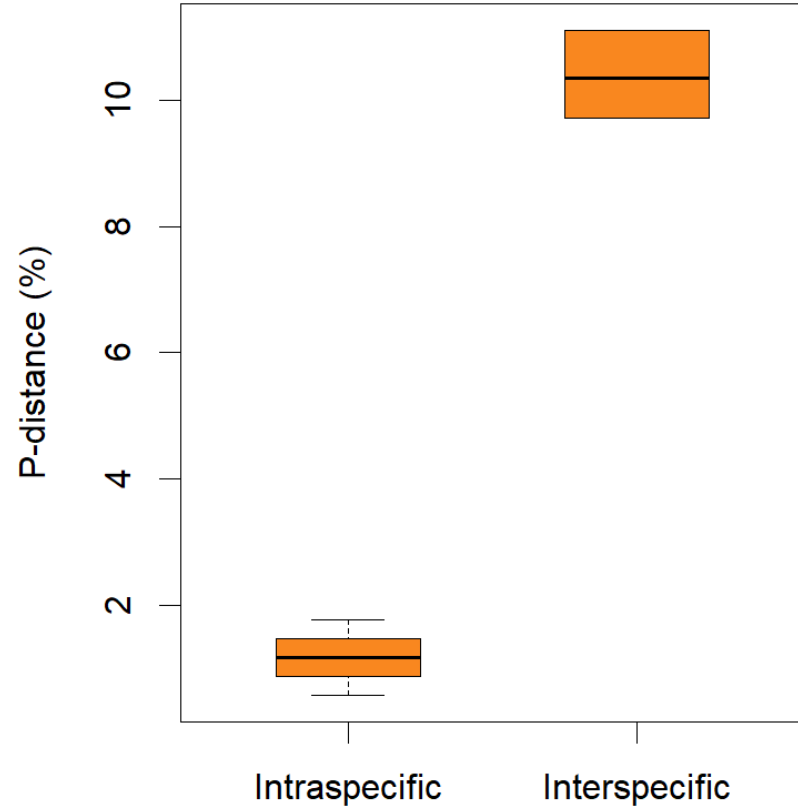

*Ericrocis*

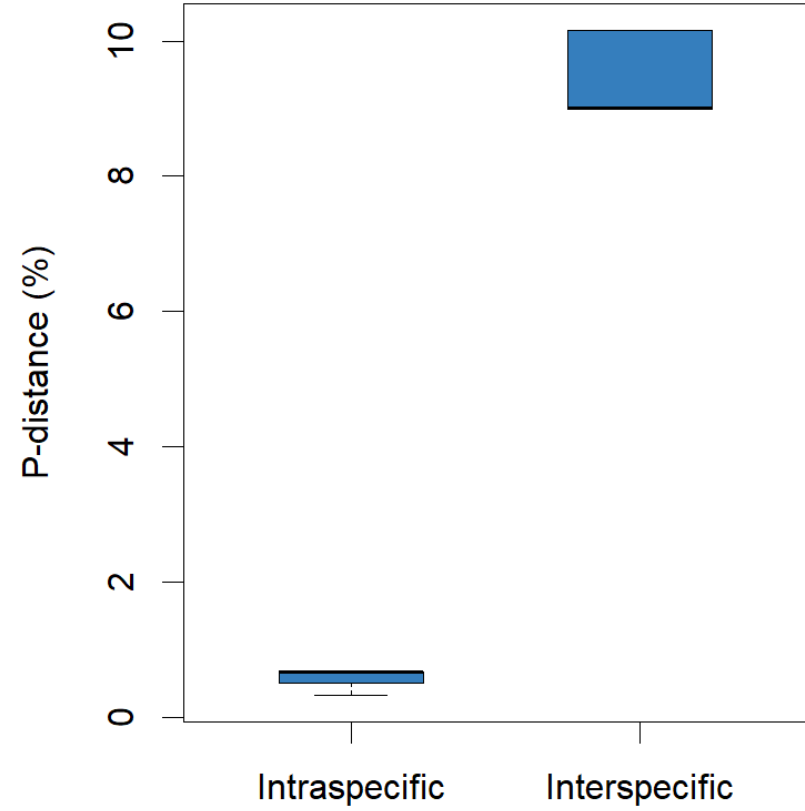

*Eucera*

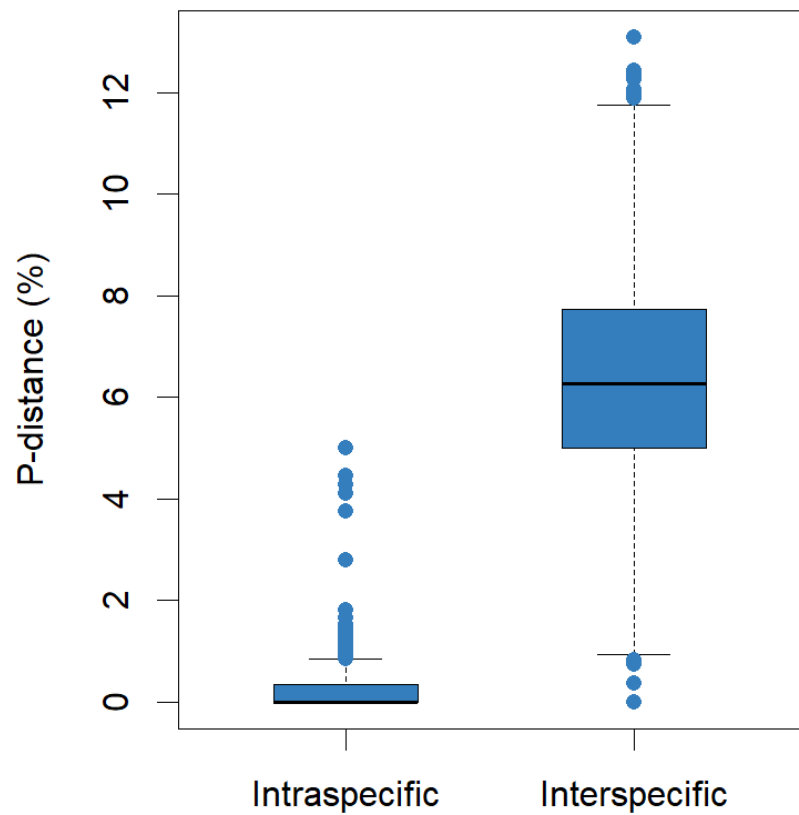

*Eucera*

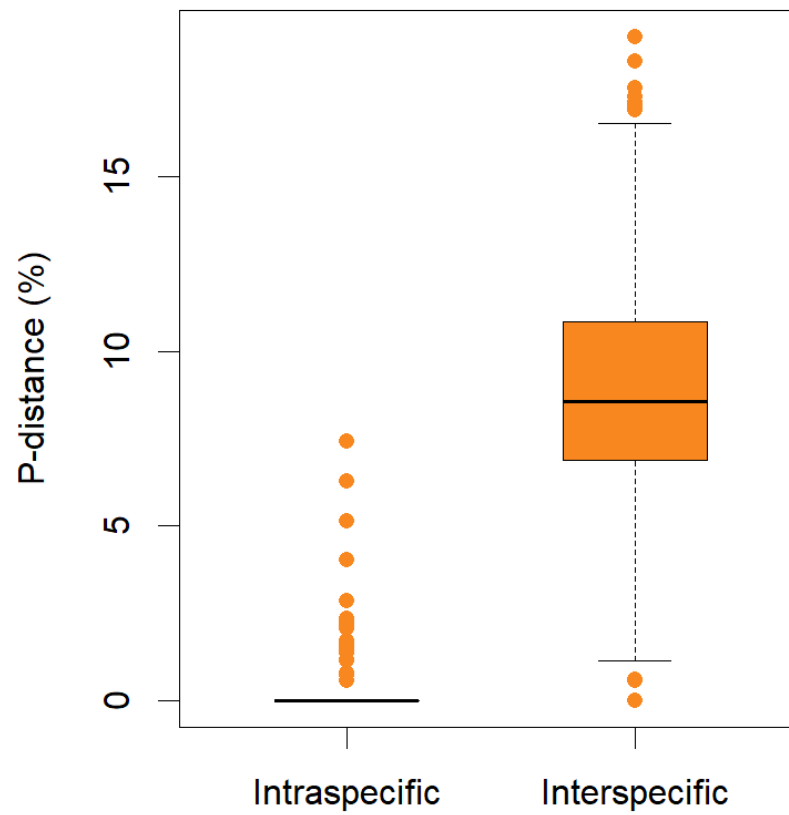

*Eufriesea*

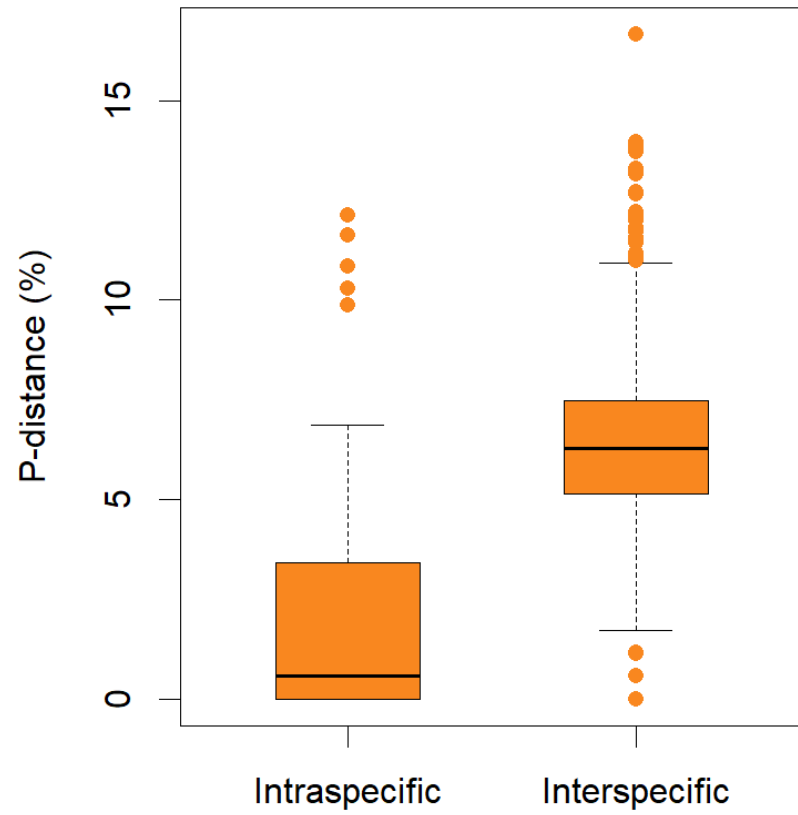

*Eufriesea*

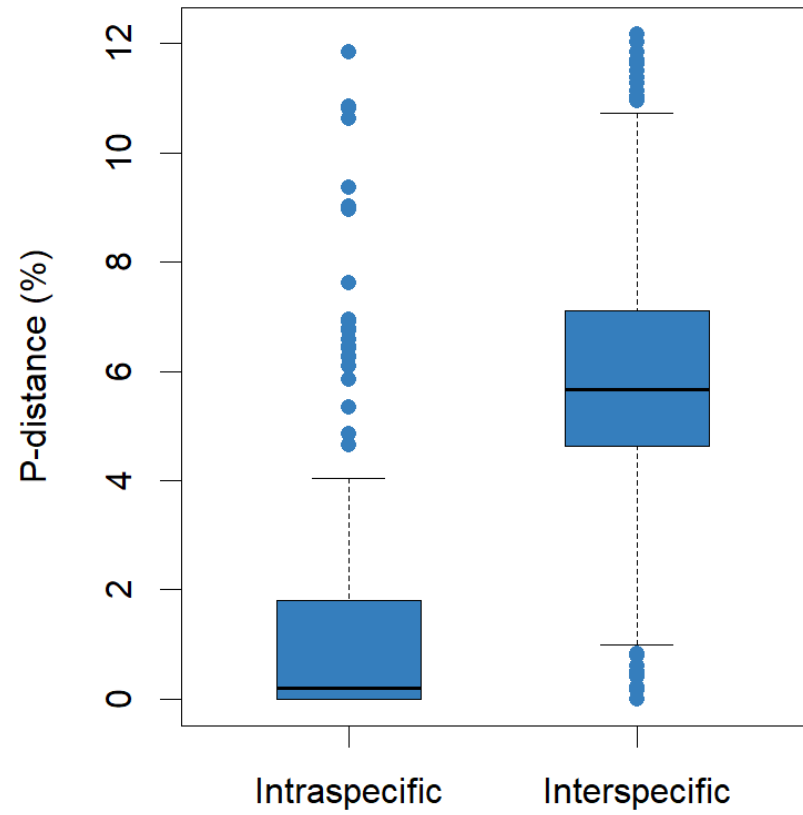

*Euglossa*

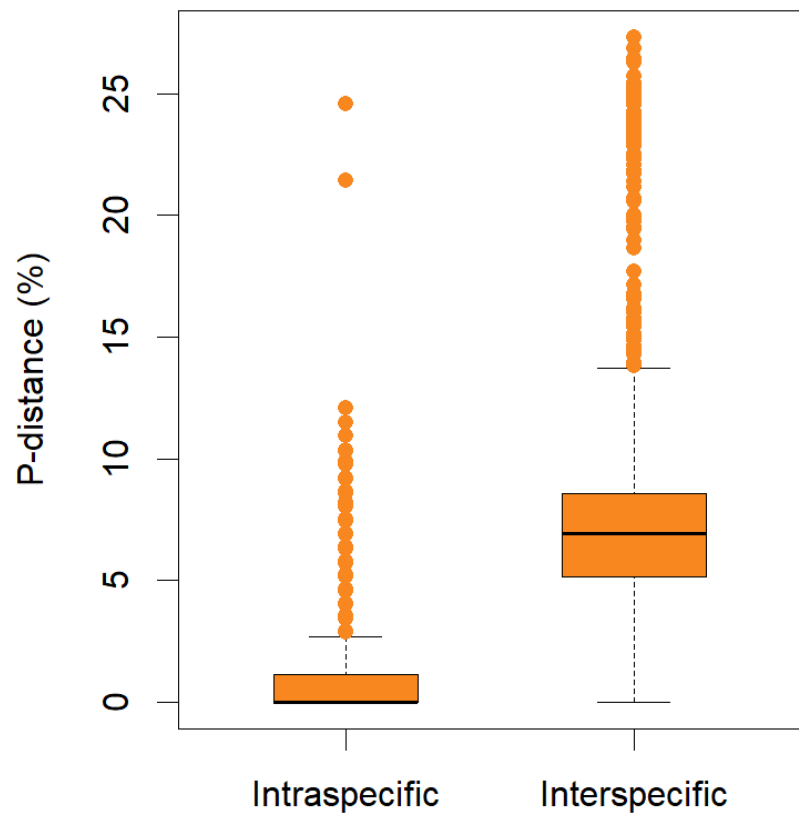

*Euglossa*

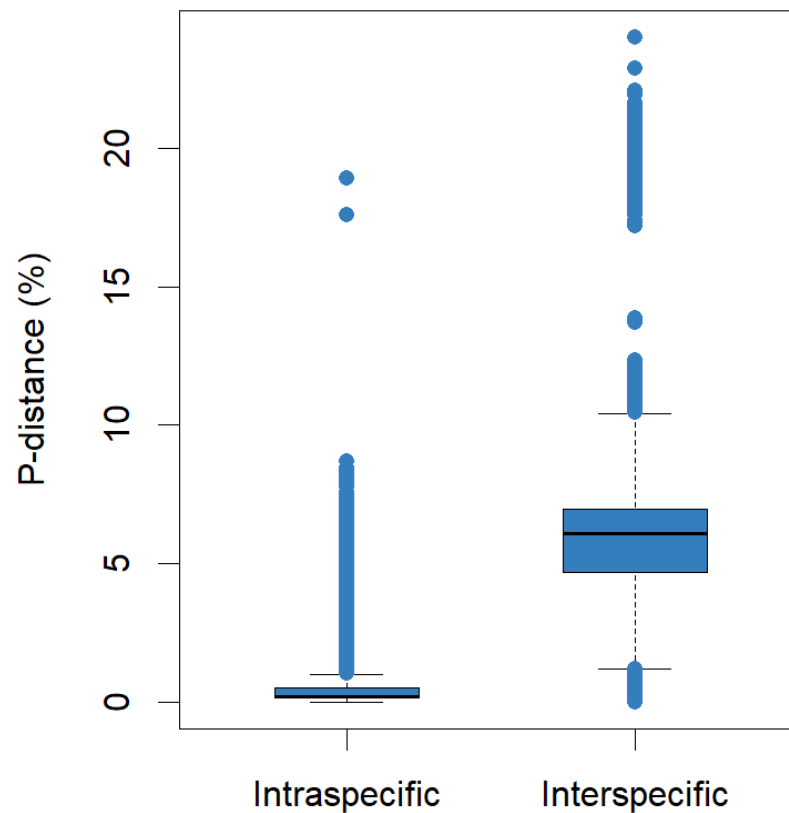

*Eulaema*

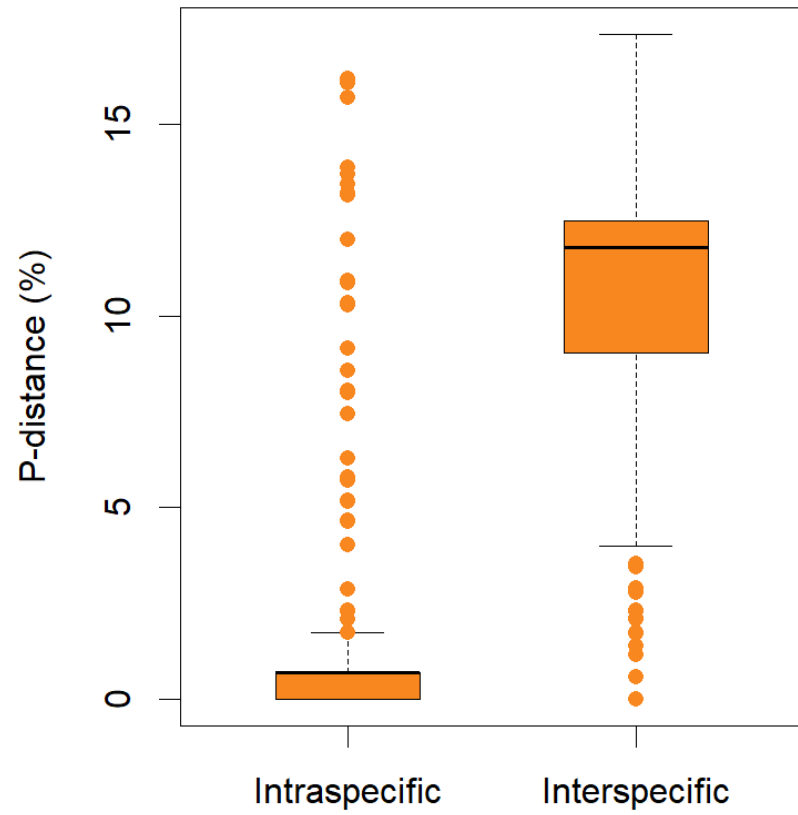

*Eulaema*

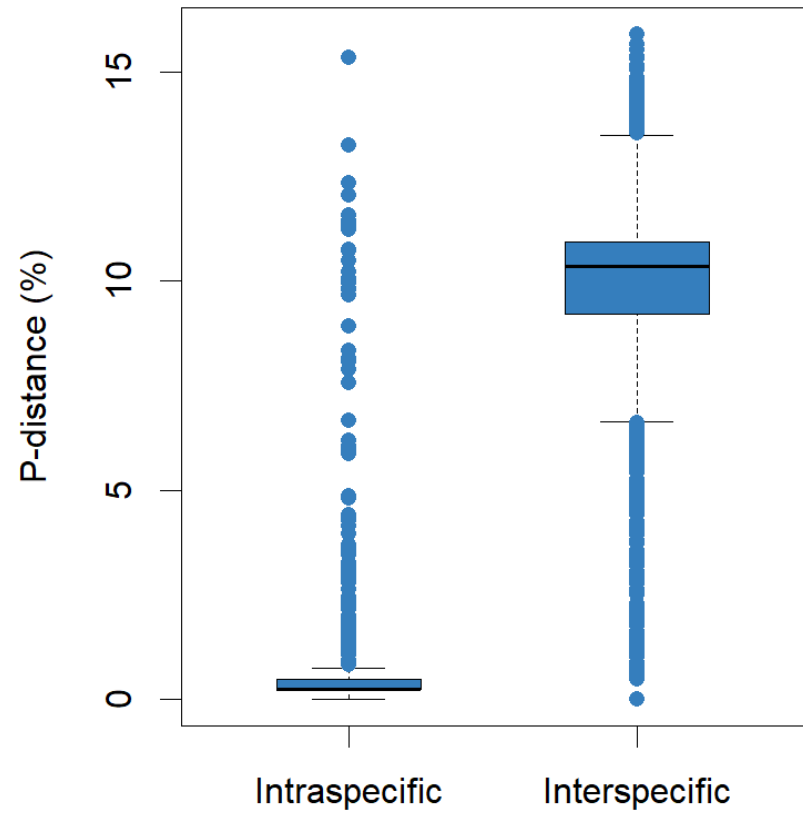

*Exaerete*

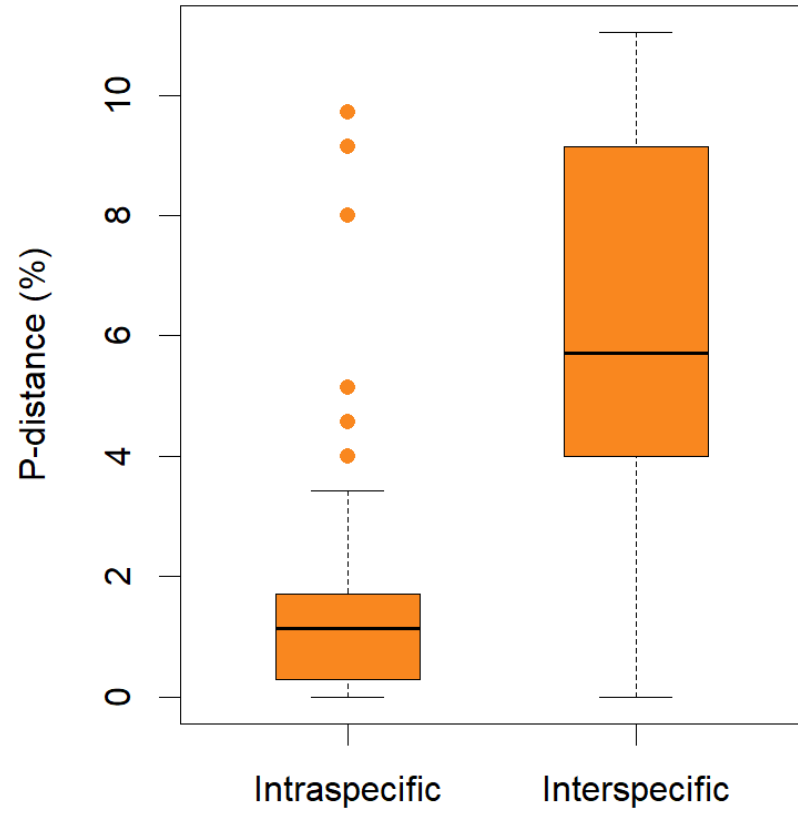

*Exaerete*

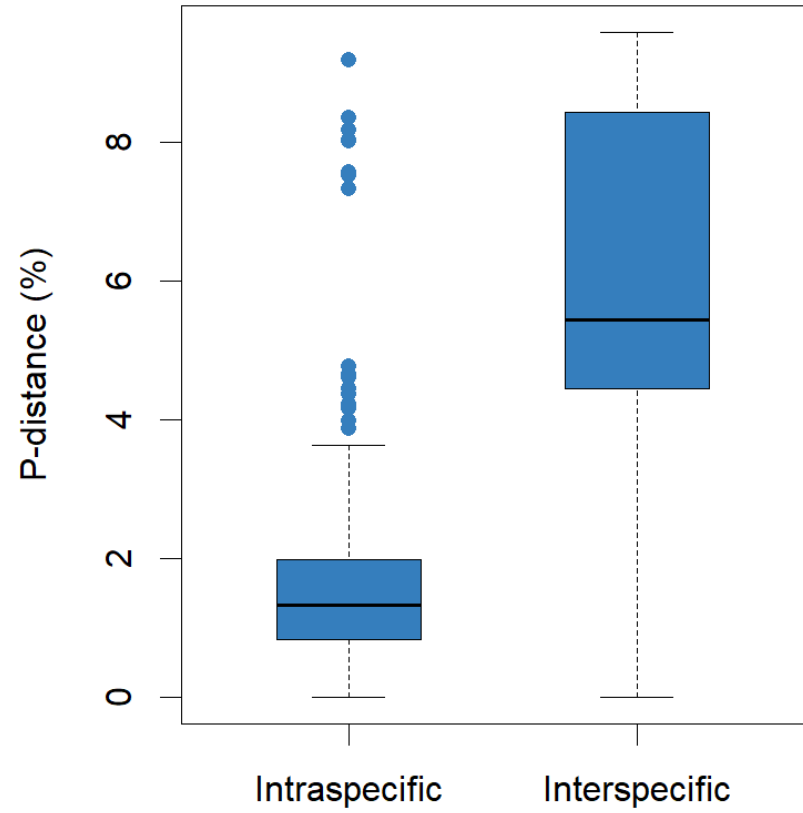

*Exomalopsis*

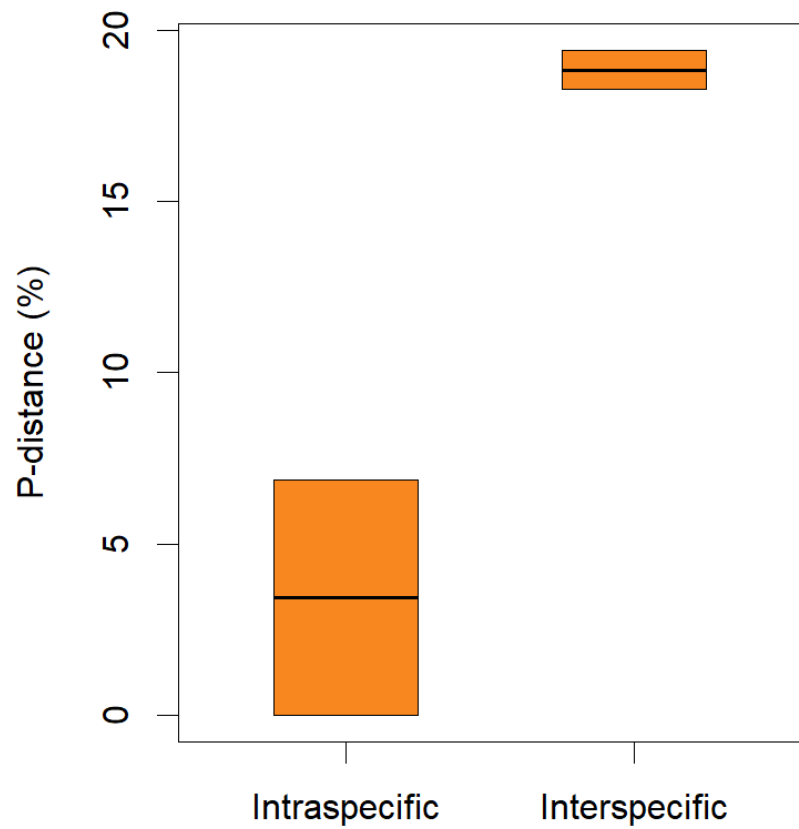

*Exomalopsis*

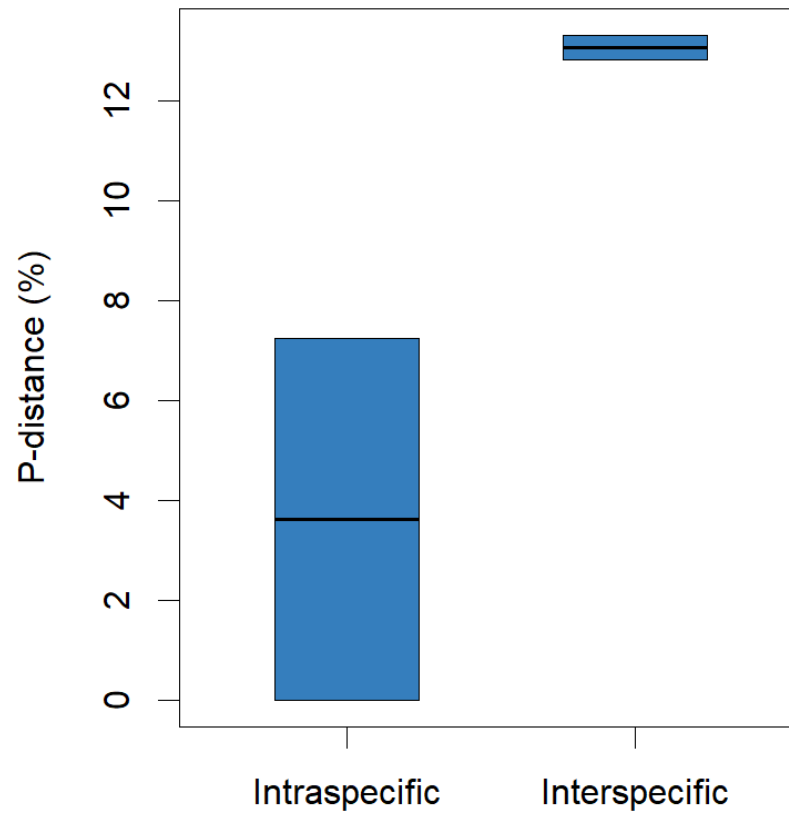



*Exoneura*

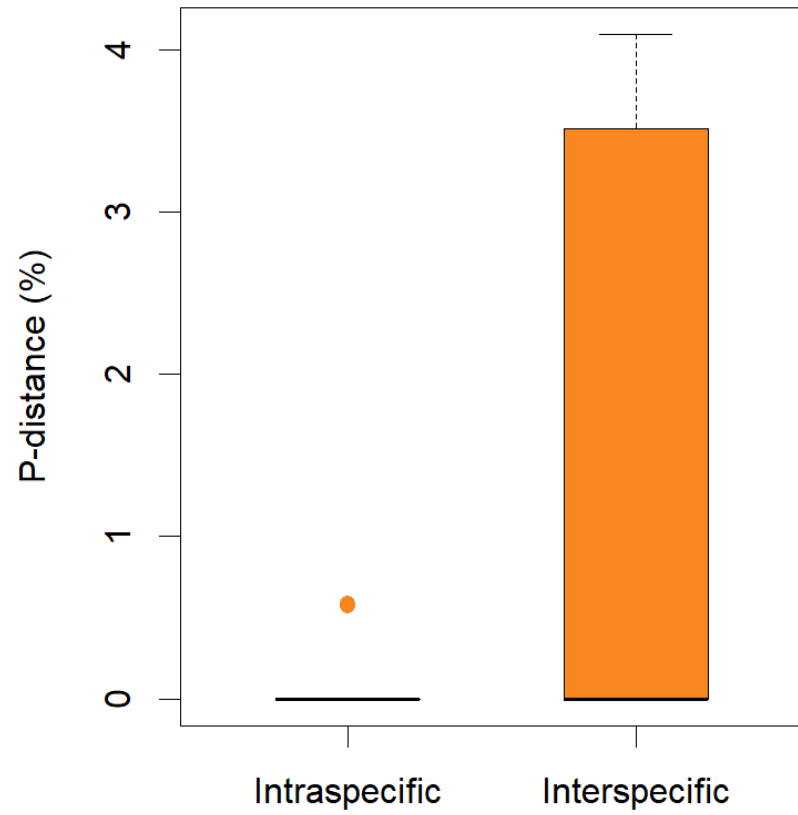

*Exoneura*

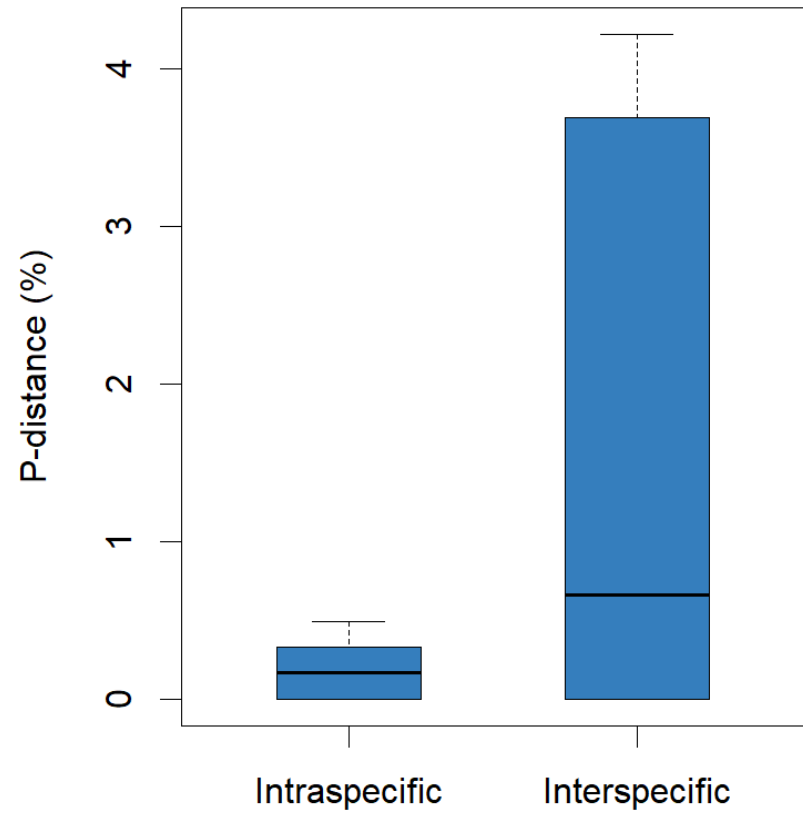

*Exoneurella*

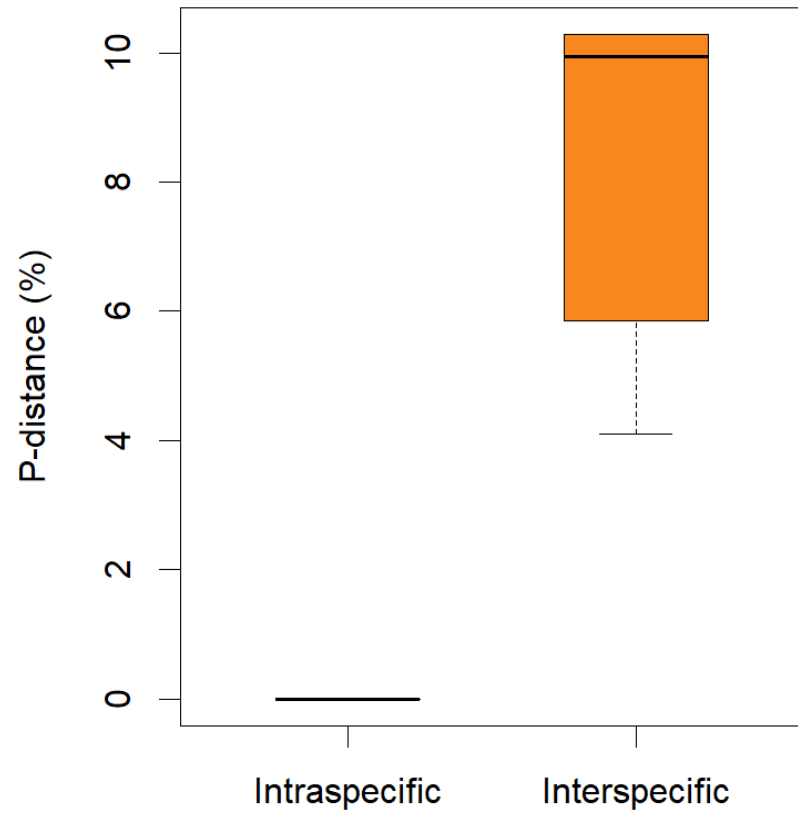

*Exoneurella*

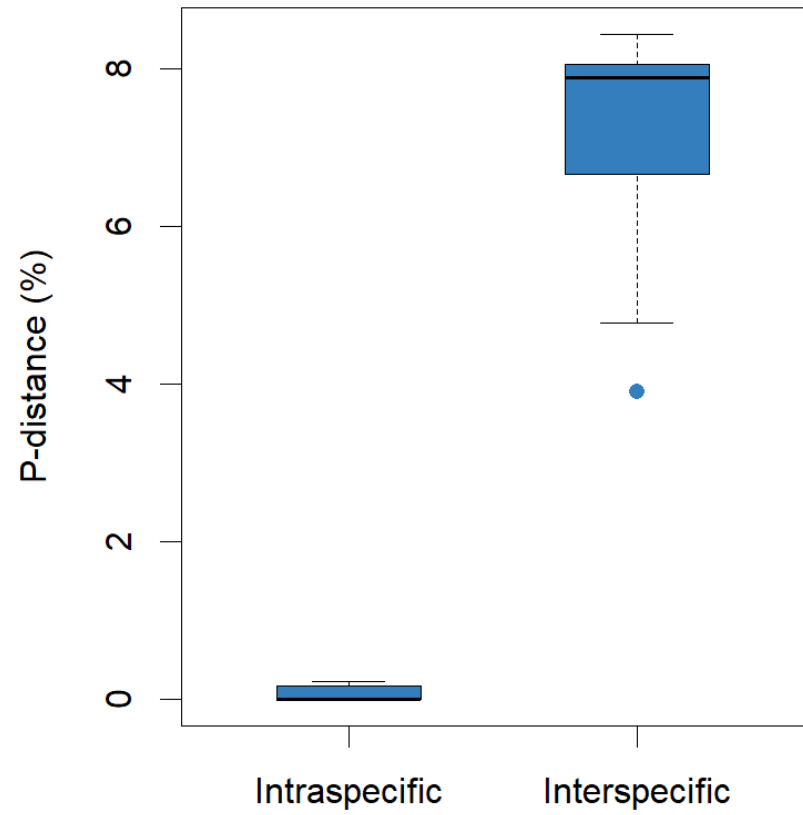

*Florilegus*

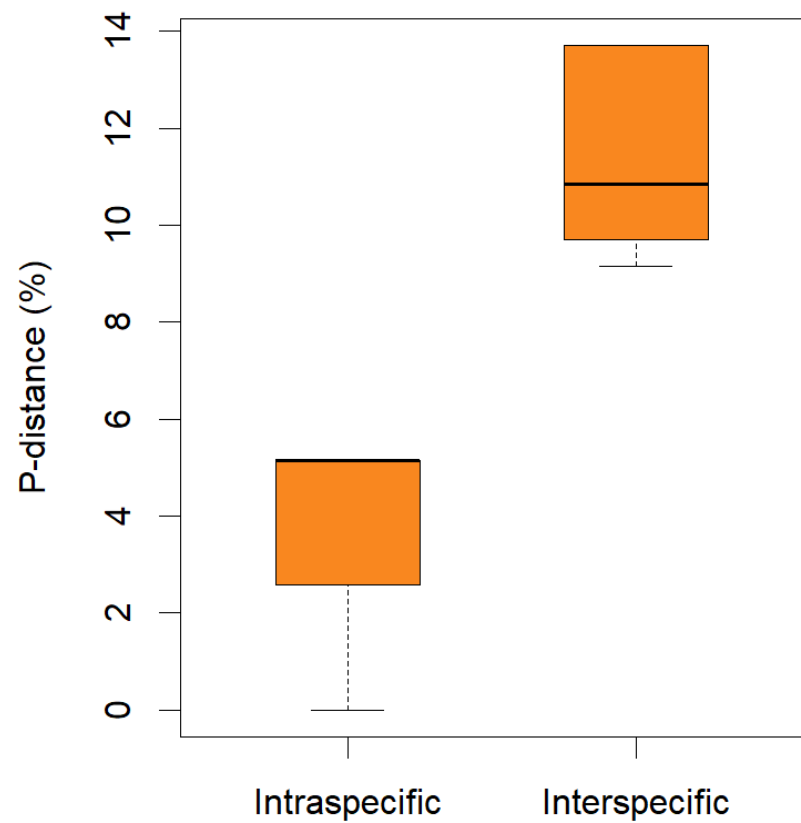

*Florilegus*

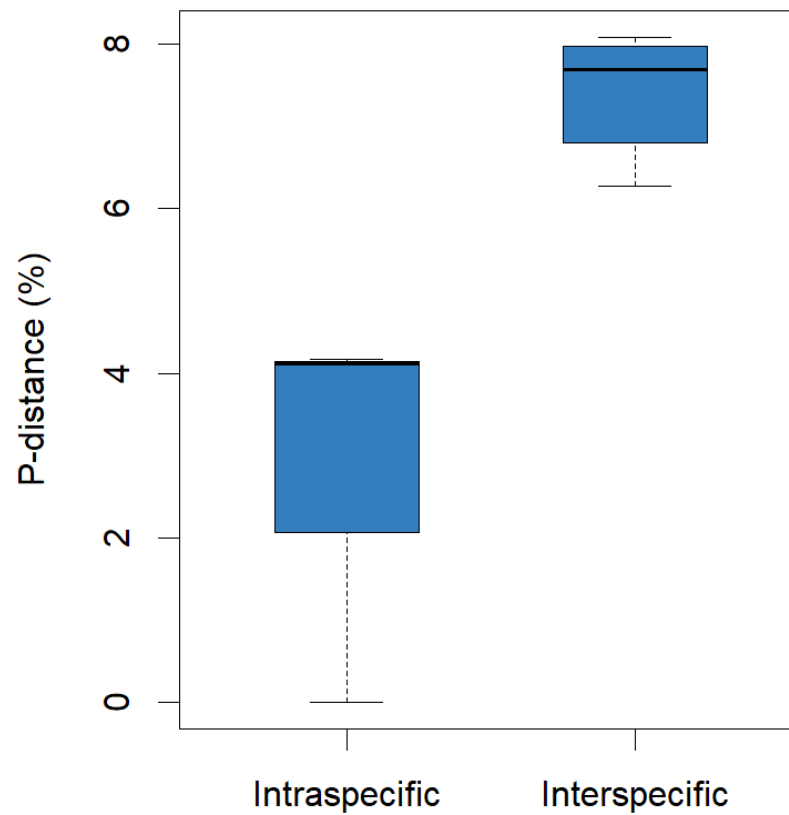

*Habropoda*

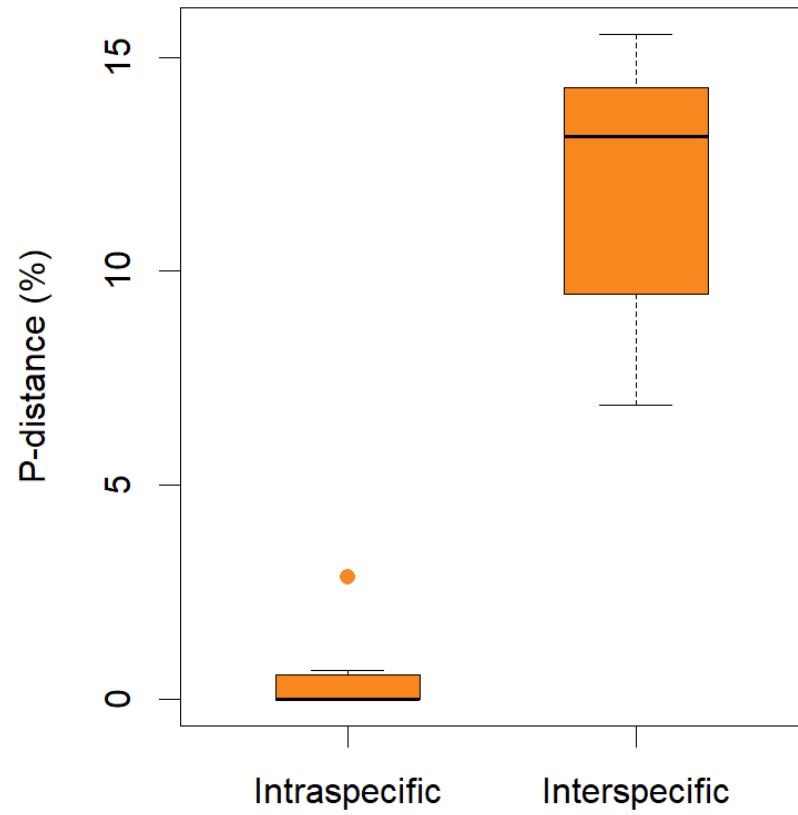

*Habropoda*

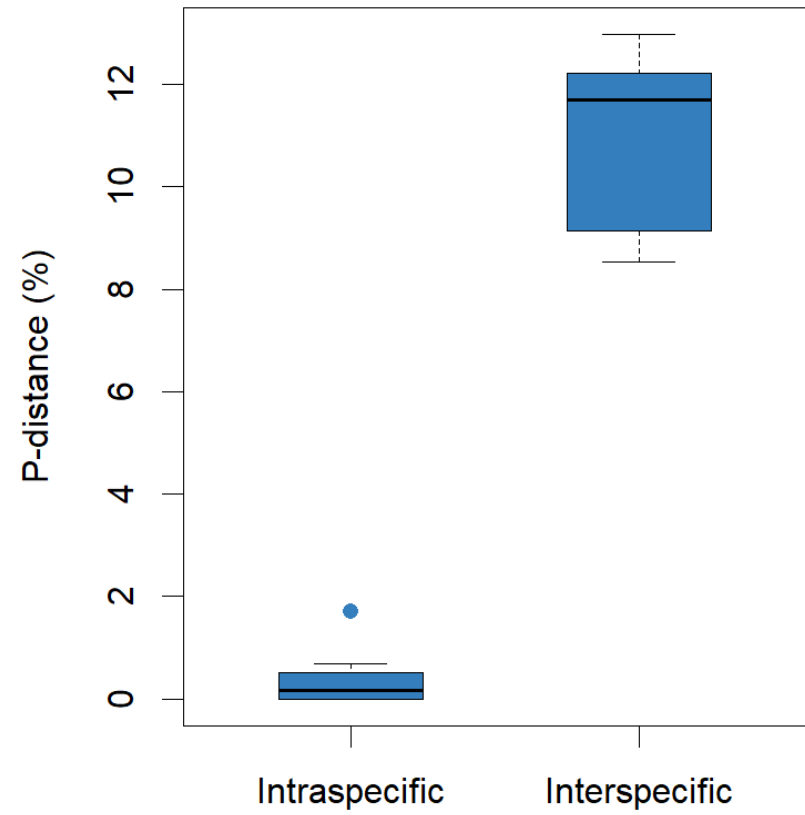

*Holcopasites*

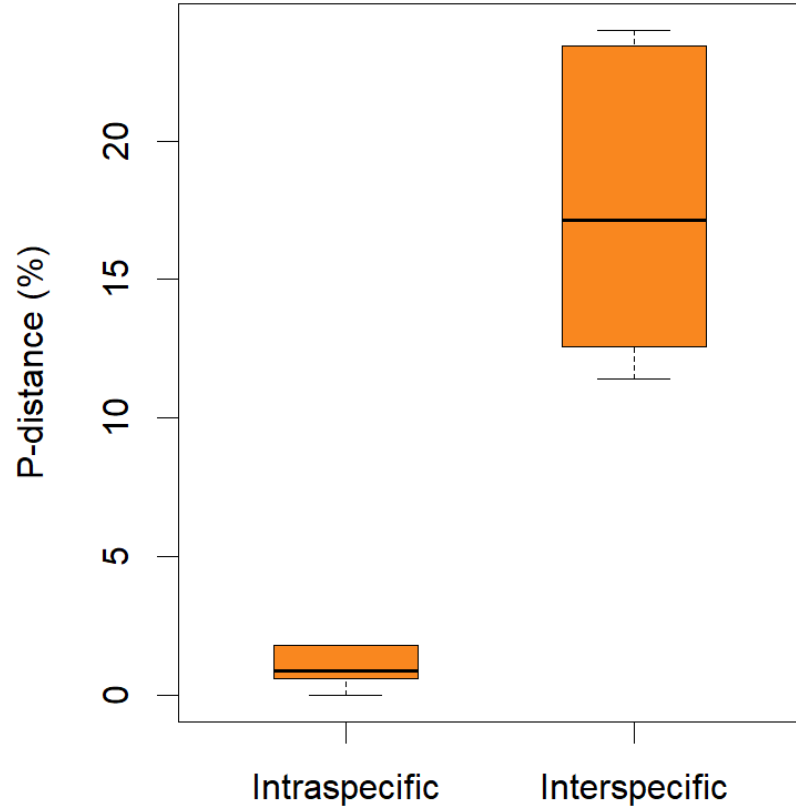

*Holcopasites*

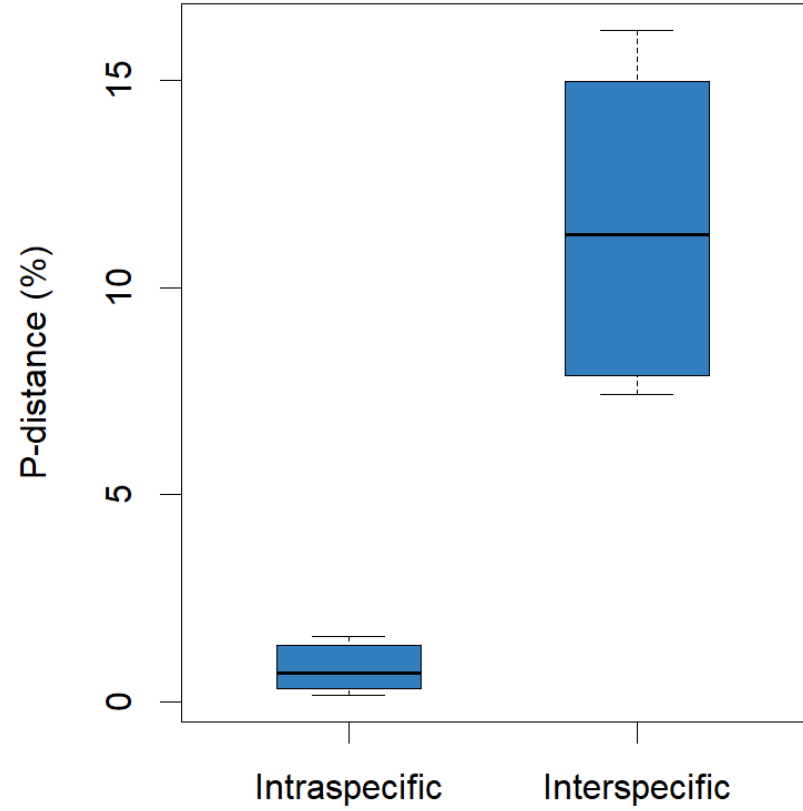

*Hopliphora*

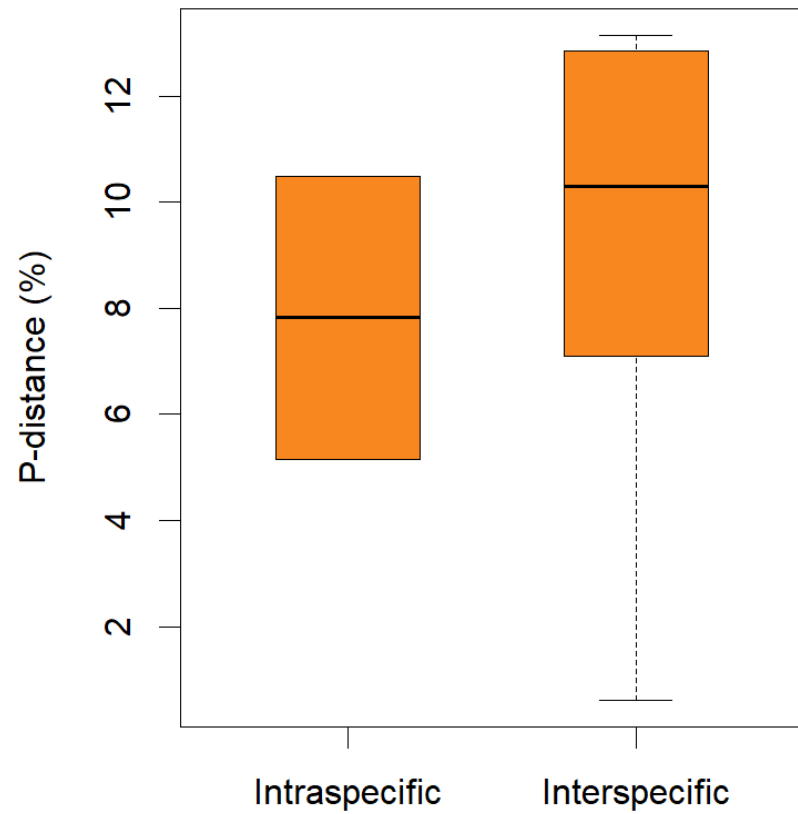

*Hopliphora*

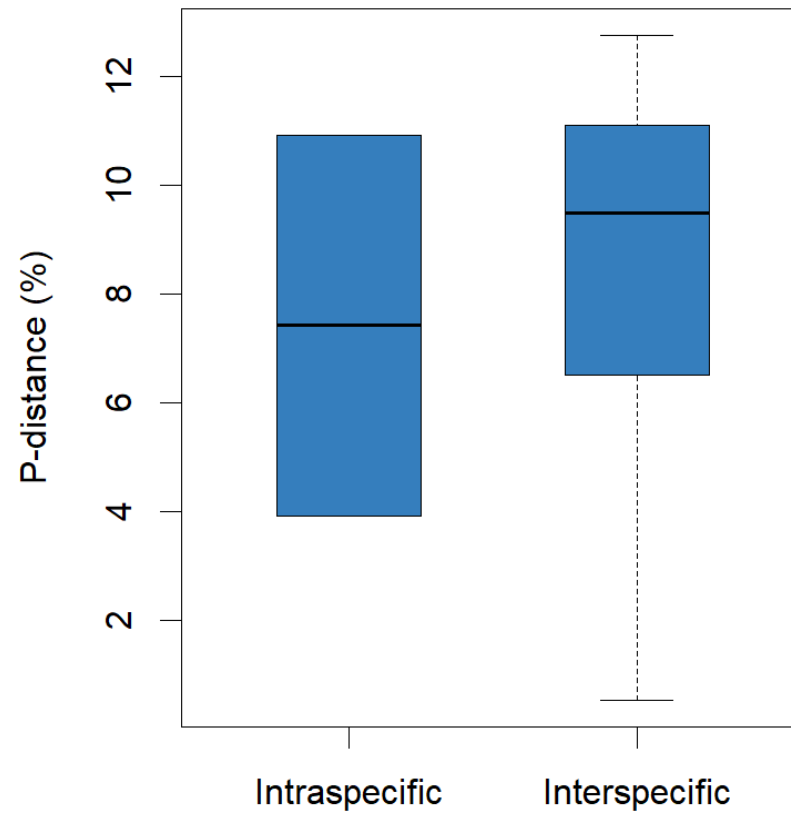

*Isepeolus*

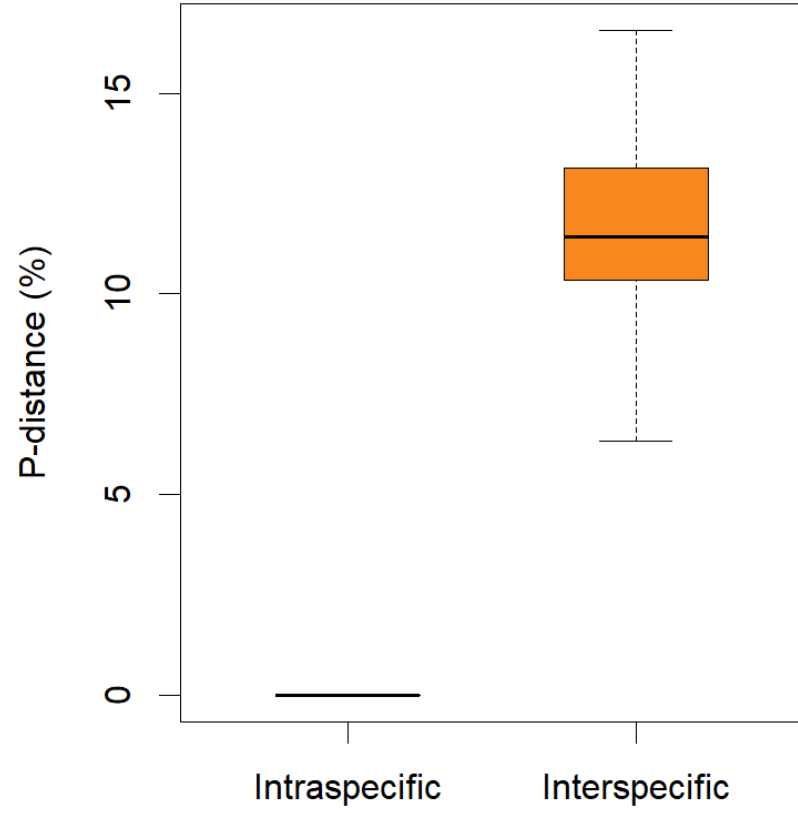

*Isepeolus*

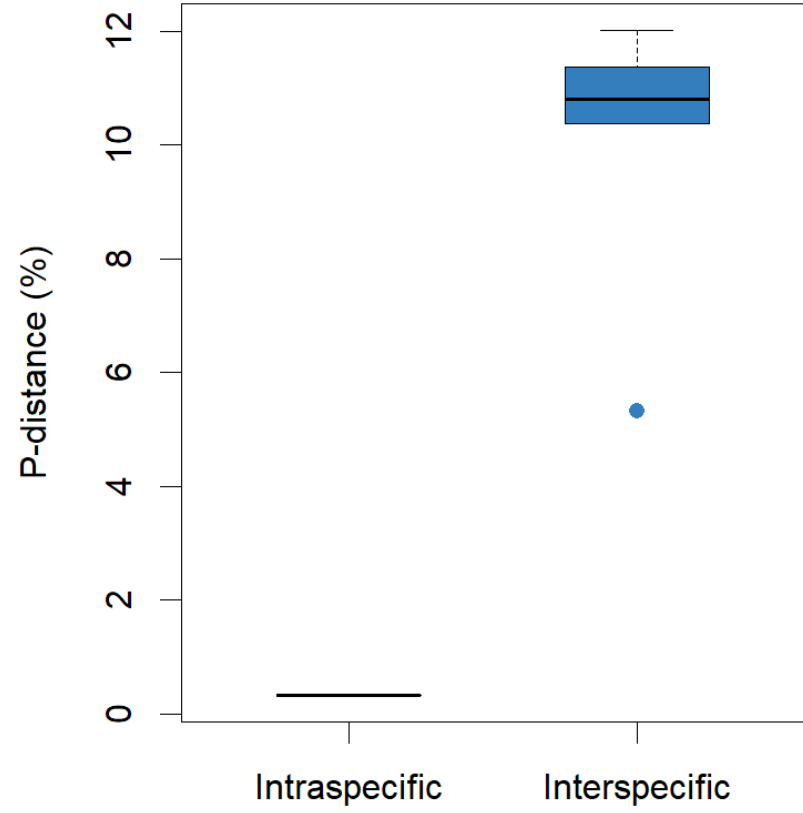

*Lanthanomelissa*

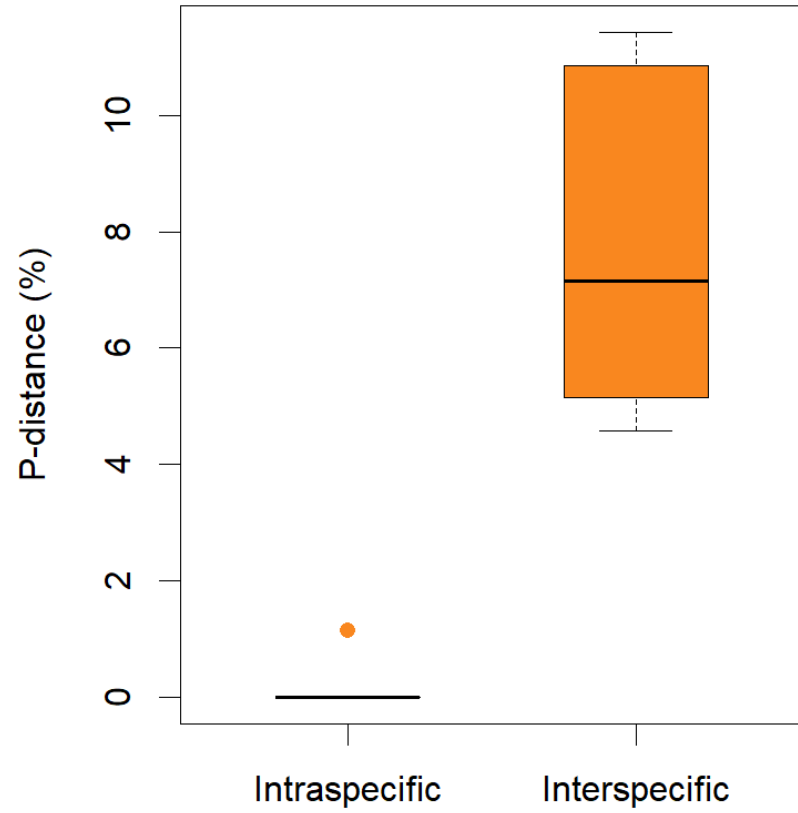

*Lanthanomelissa*

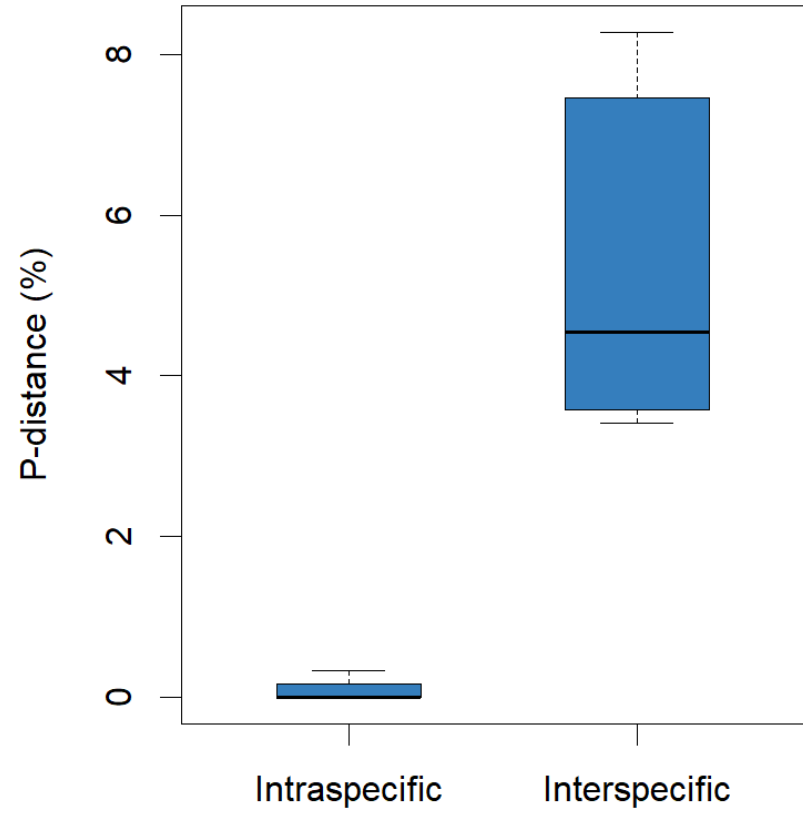



*Leiopodus*

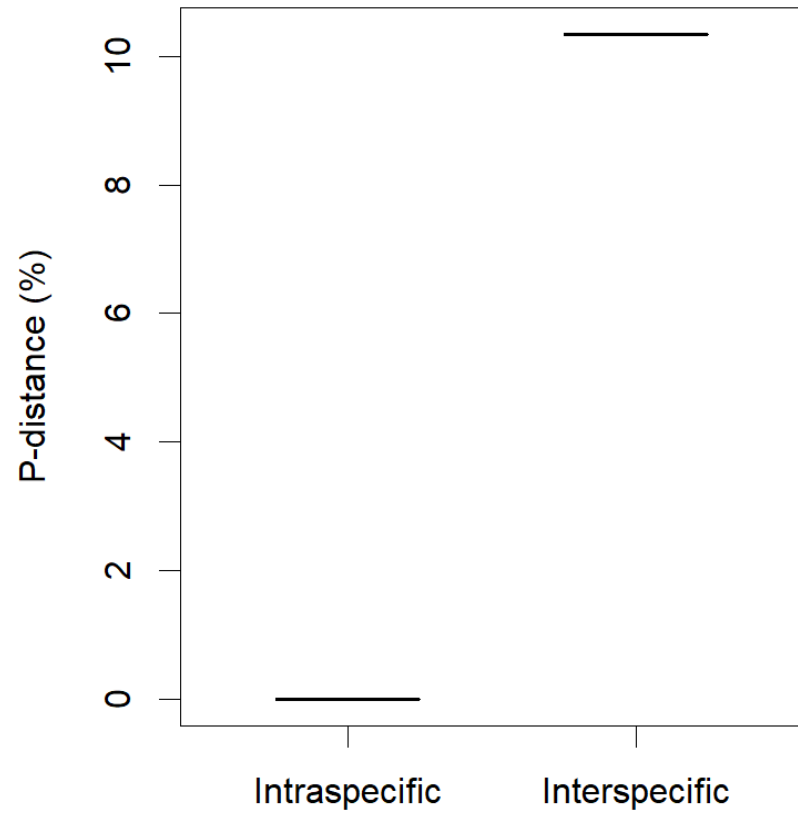

*Leiopodus*

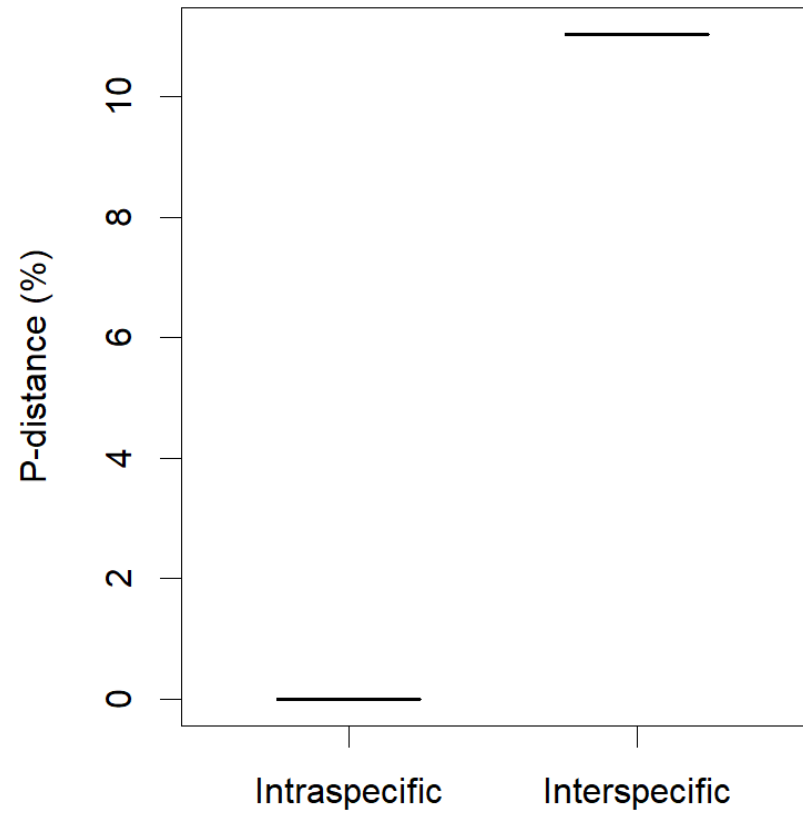

*Liotrigona*

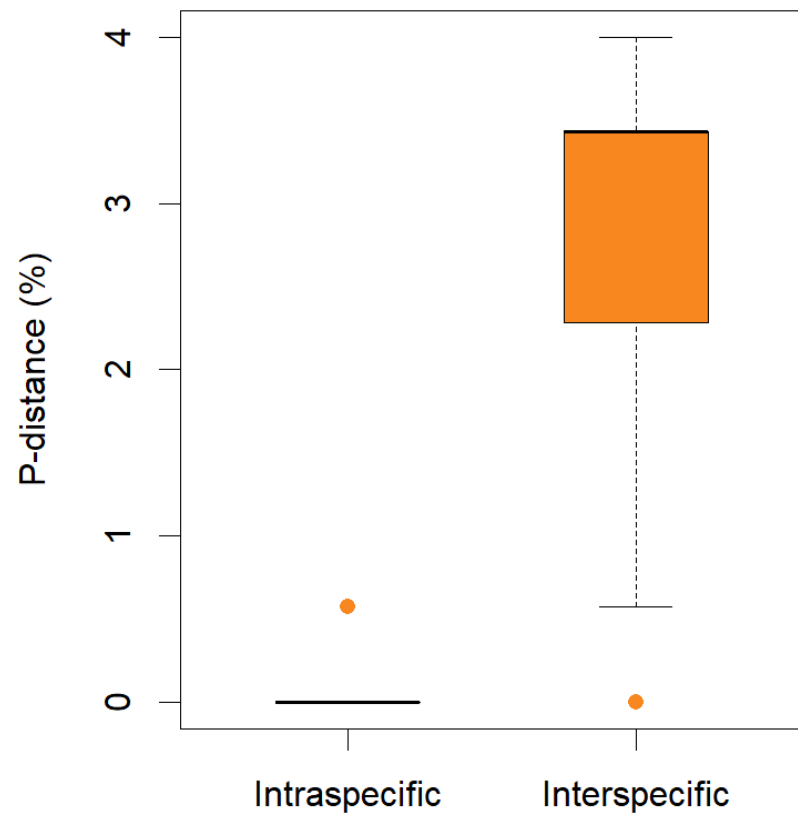

*Liotrigona*

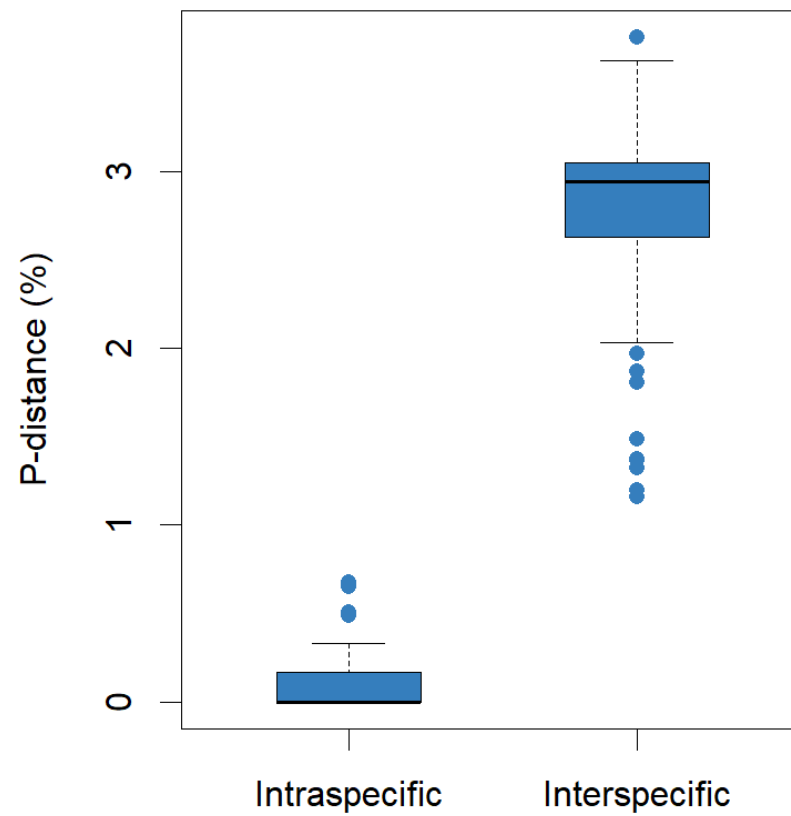

*Macrogalea*

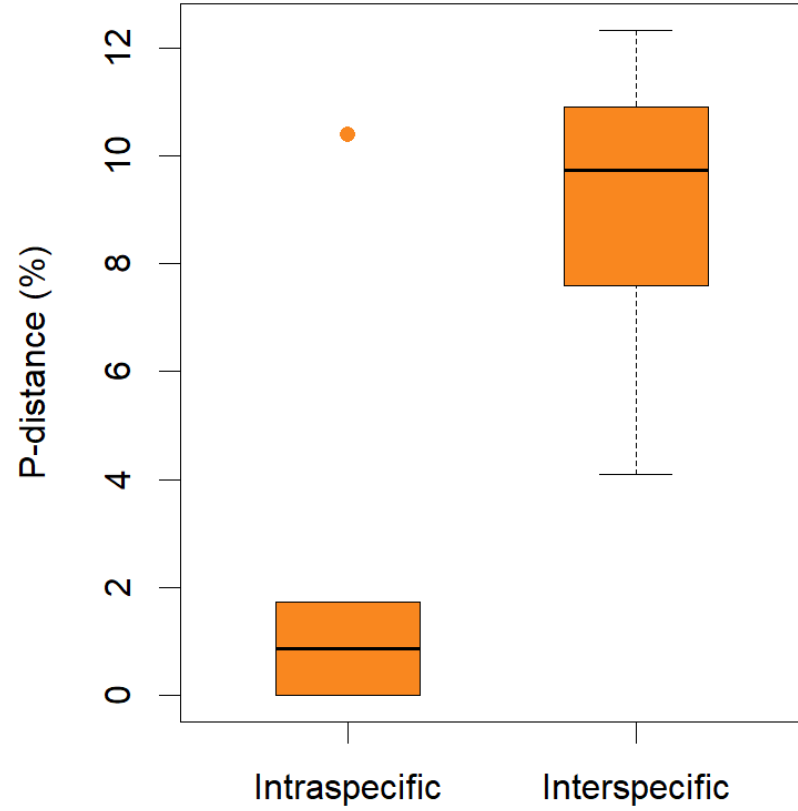

*Macrogalea*

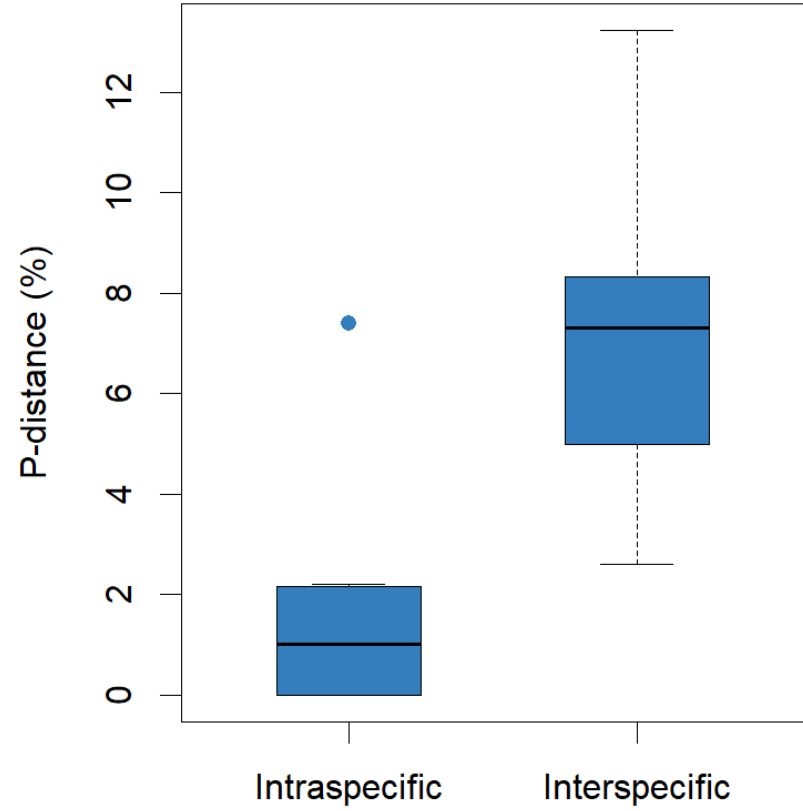

*Melecta*

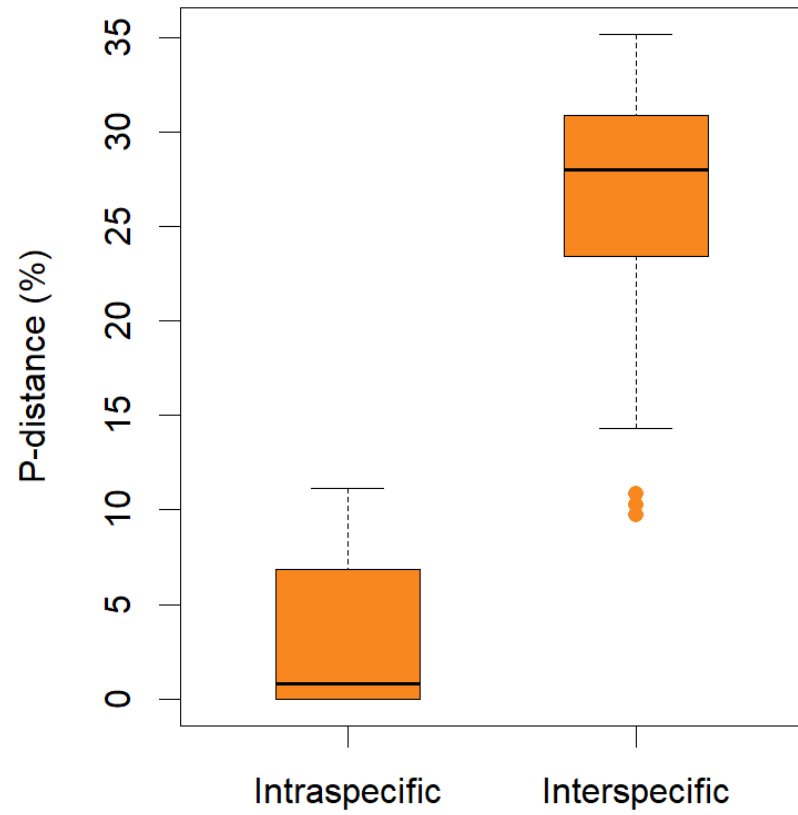

*Melecta*

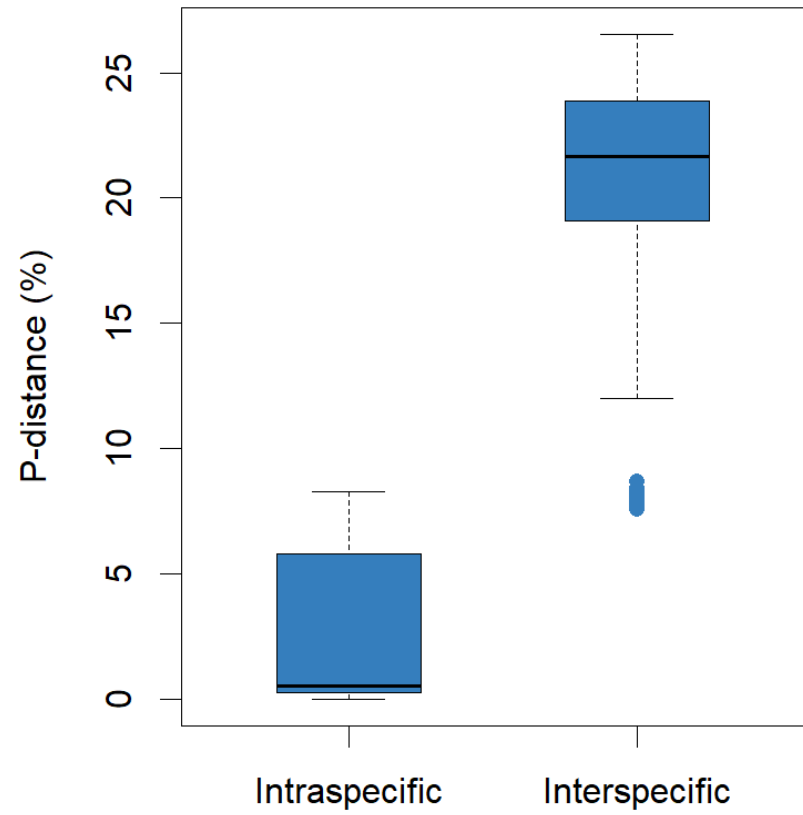

*Melectoides*

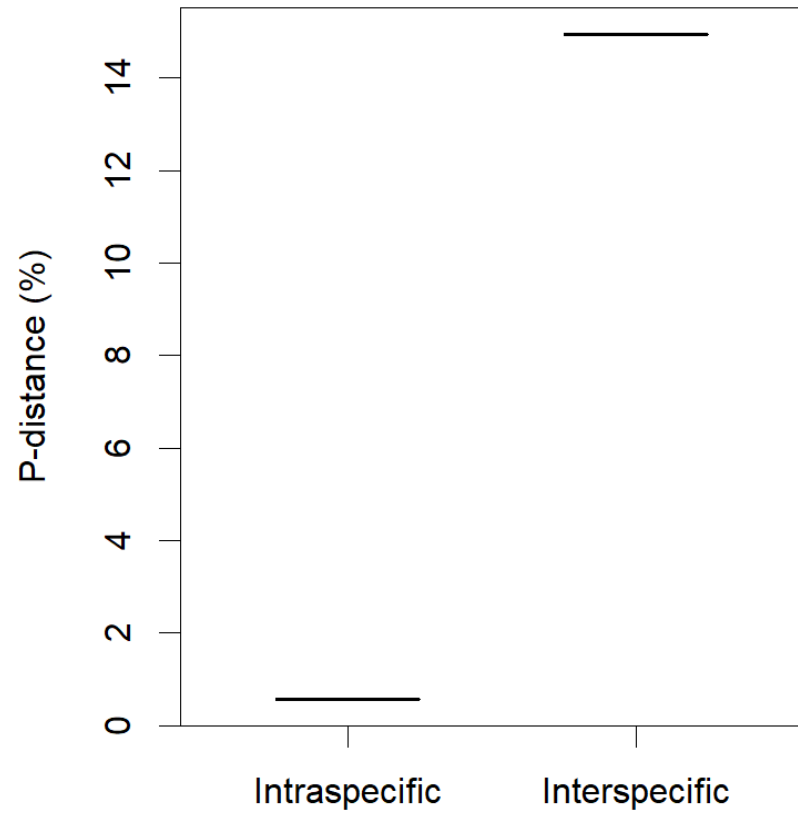

*Melectoides*

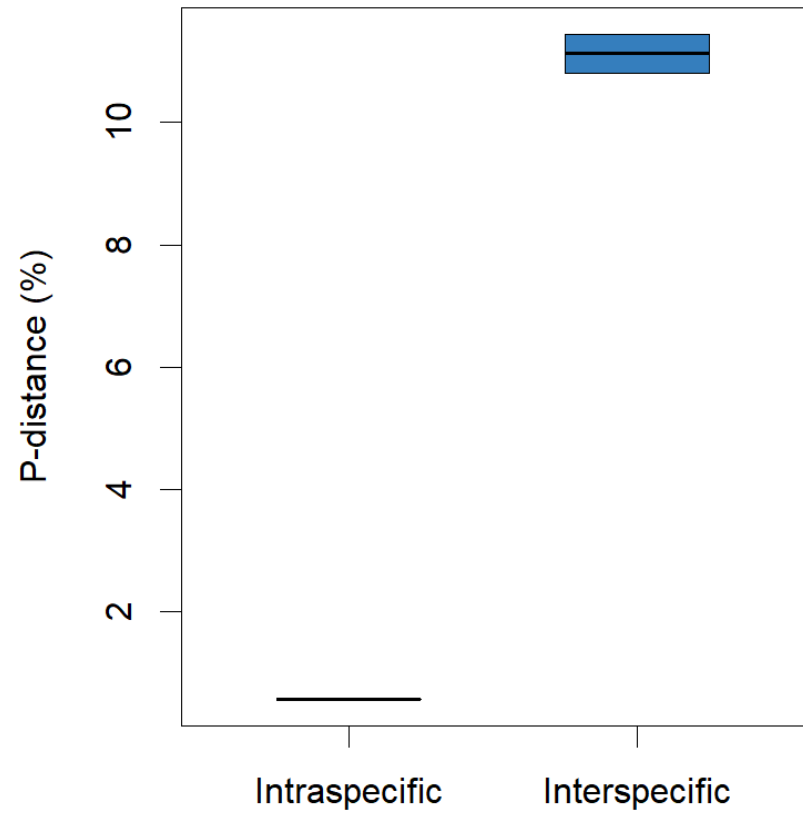

*Melipona*

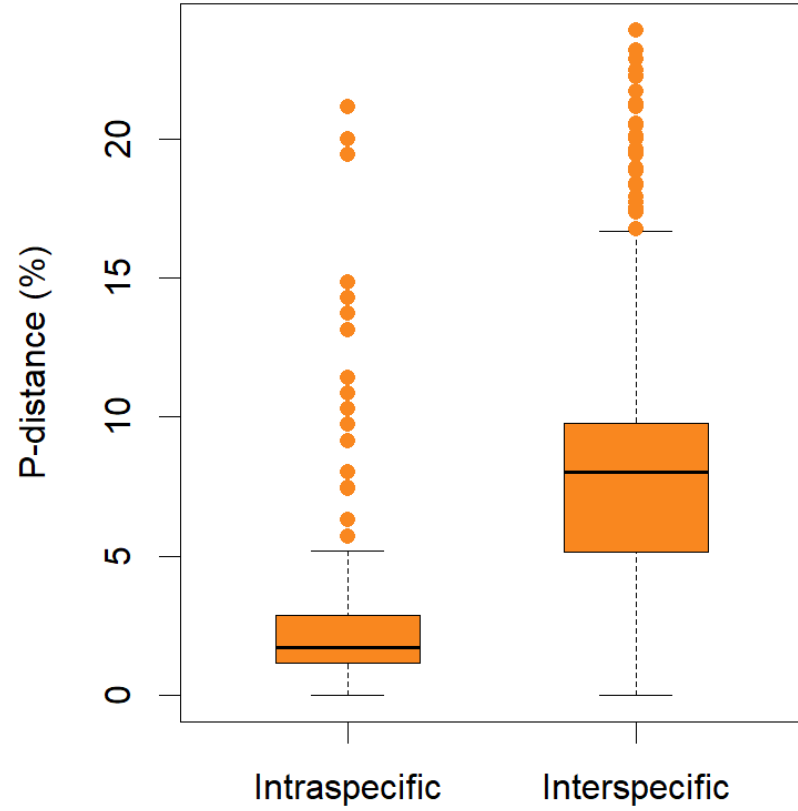

*Melipona*

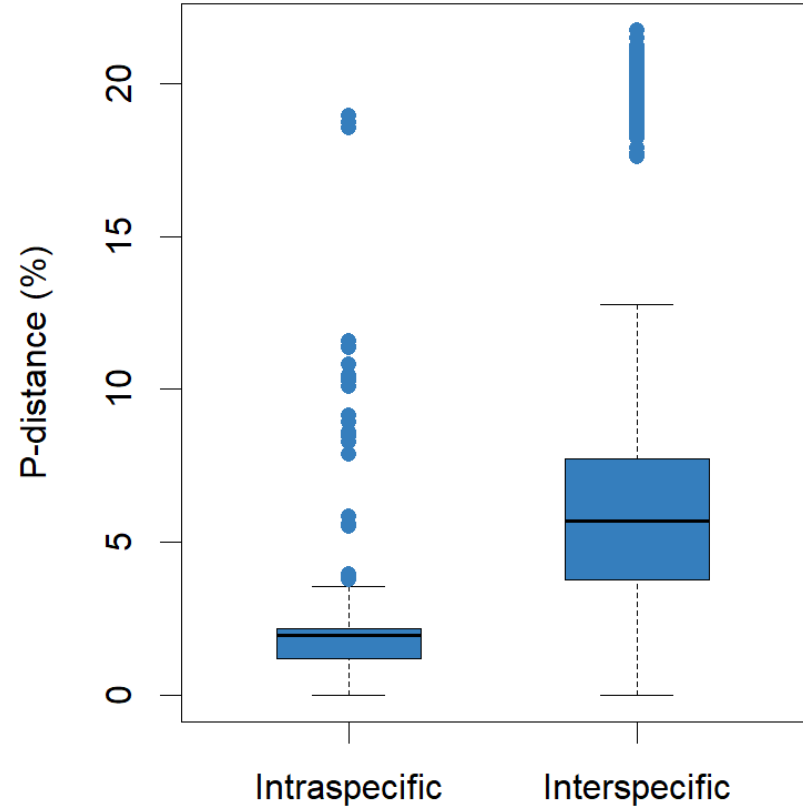

*Melissodes*

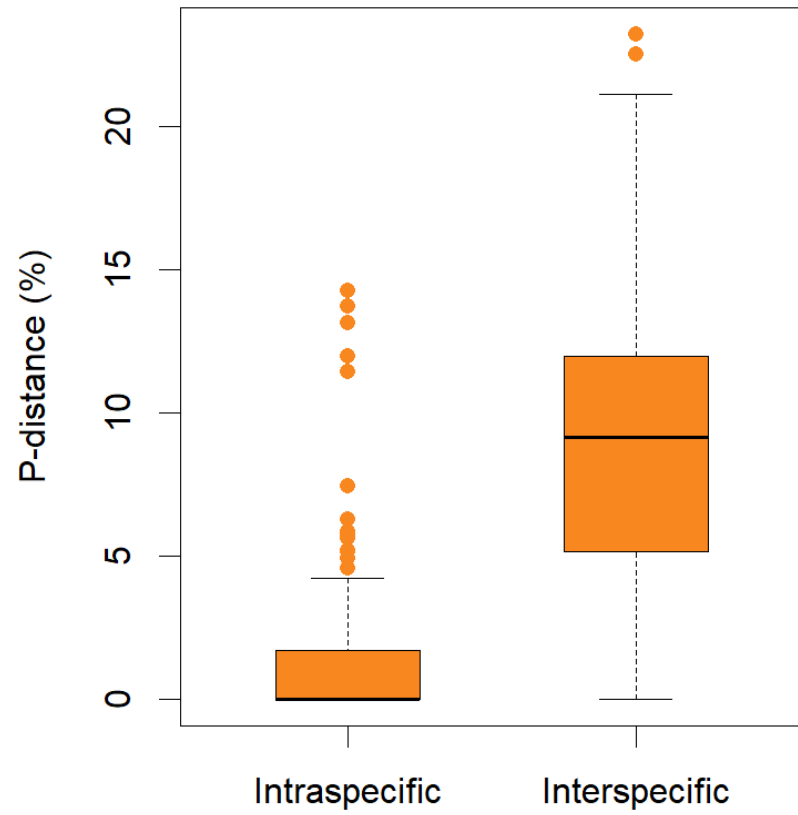

*Melissodes*

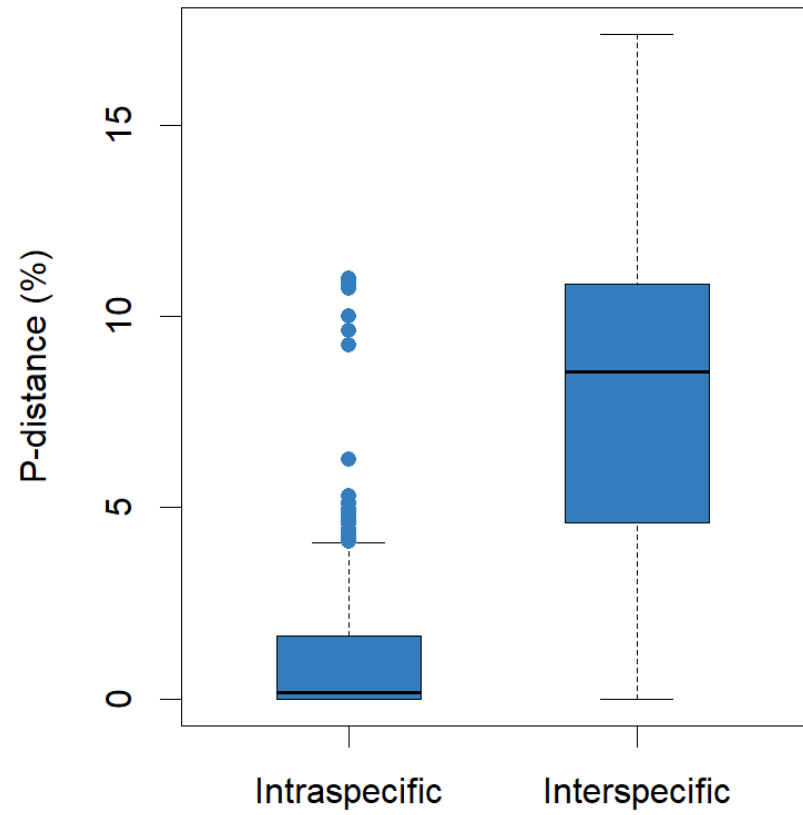

*Melitoma*

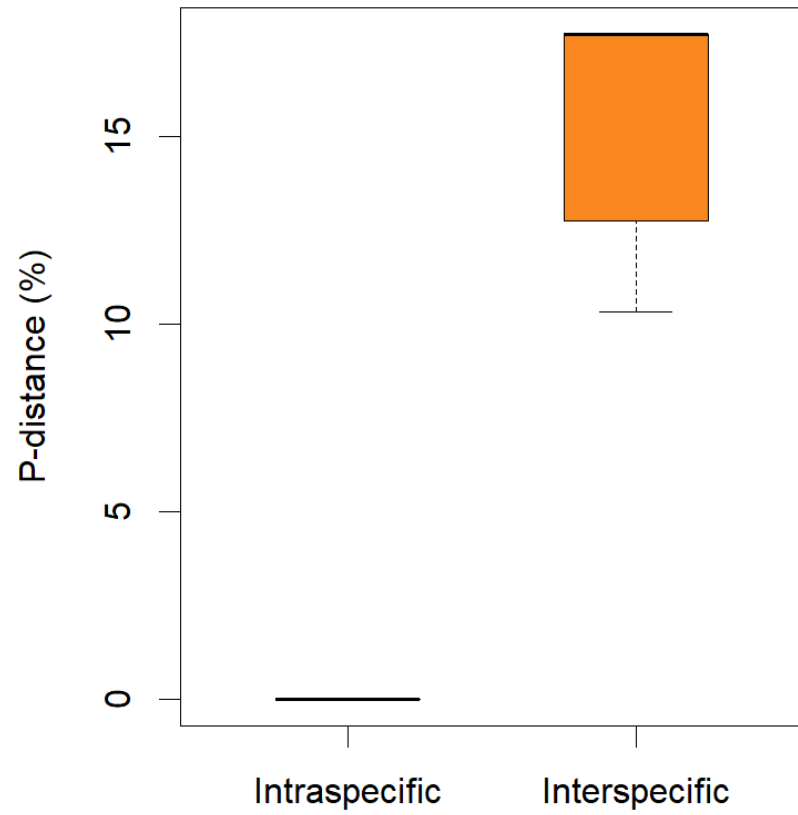

*Melitoma*

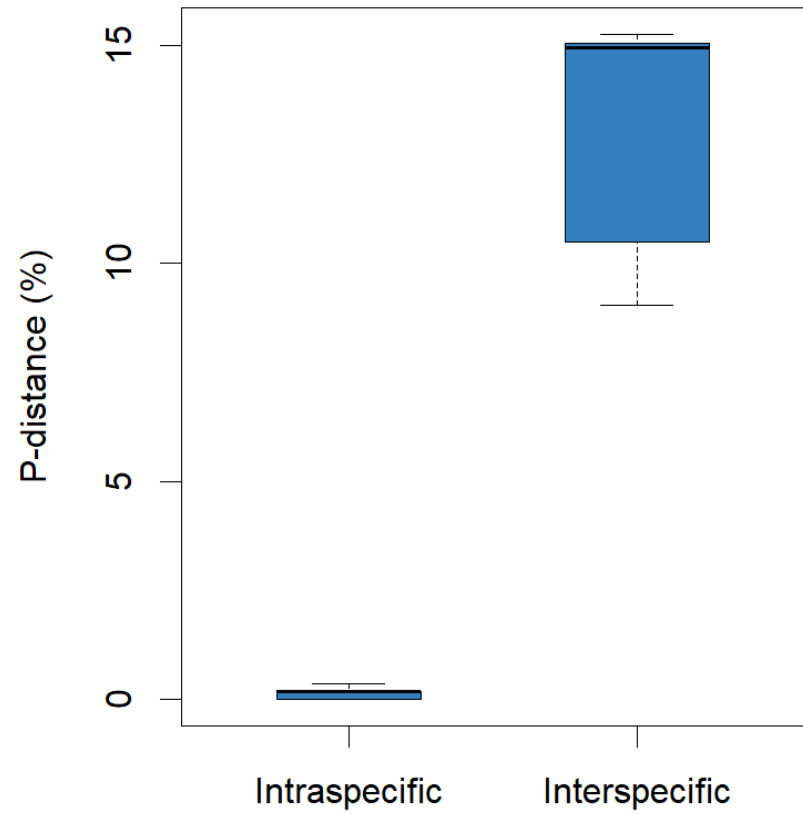



*Mesoplia*

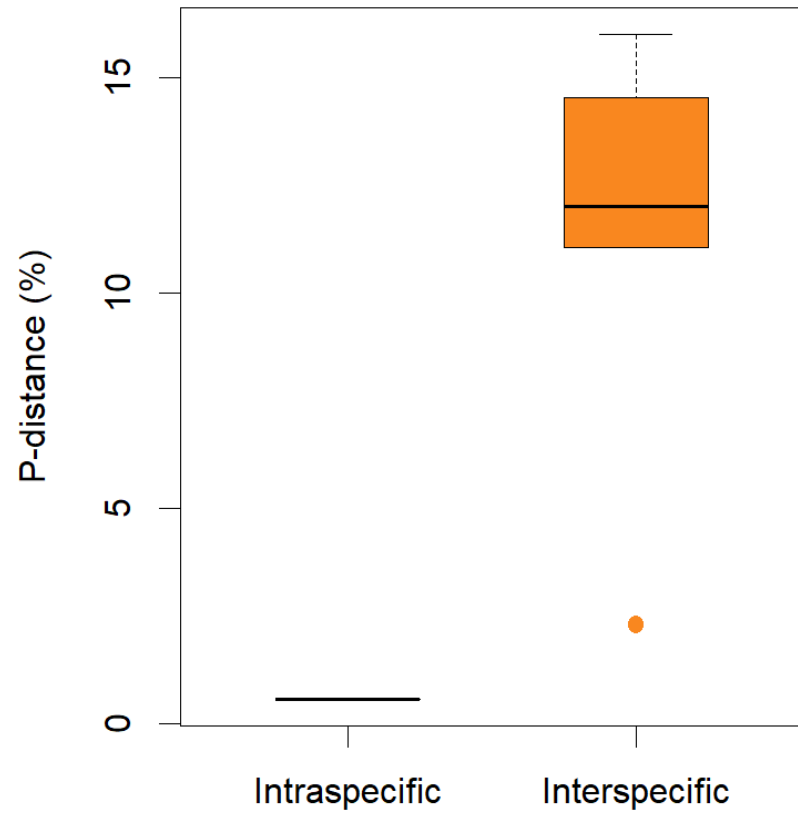

*Mesoplia*

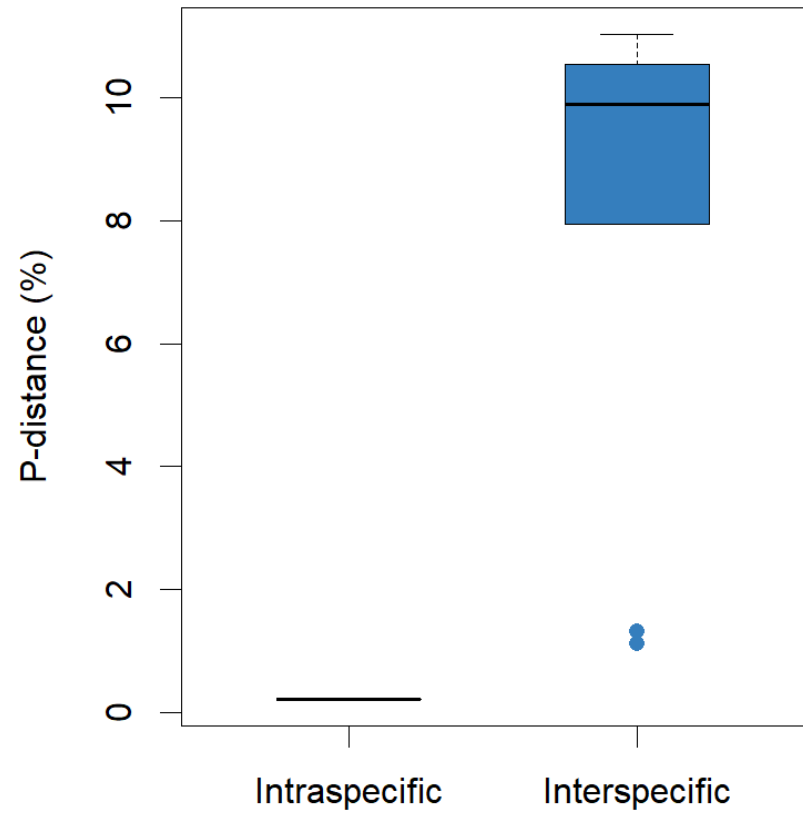

*Neolarra*

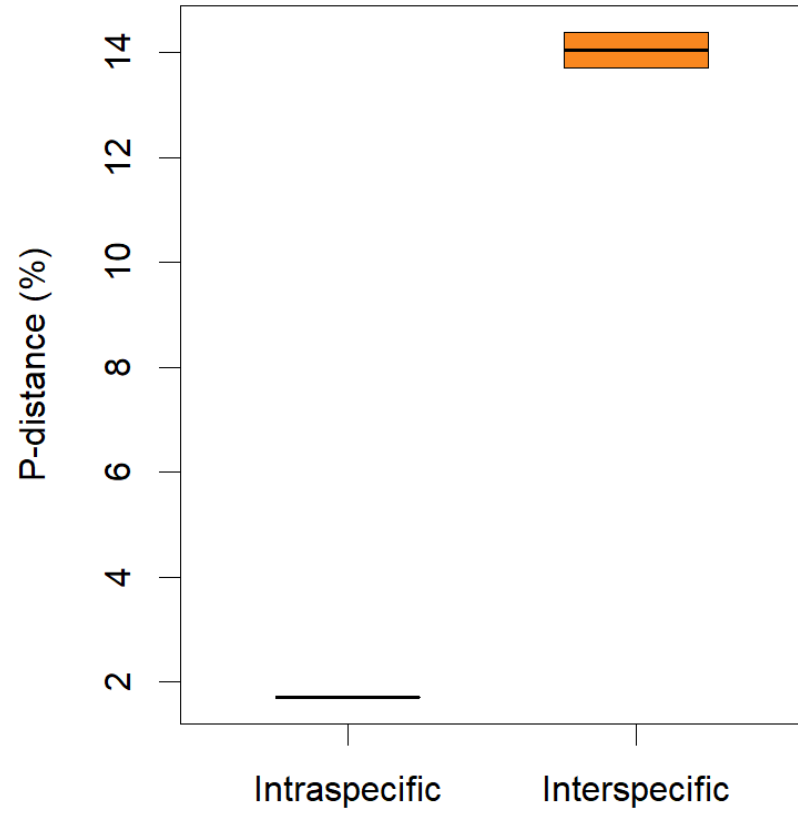

*Neolarra*

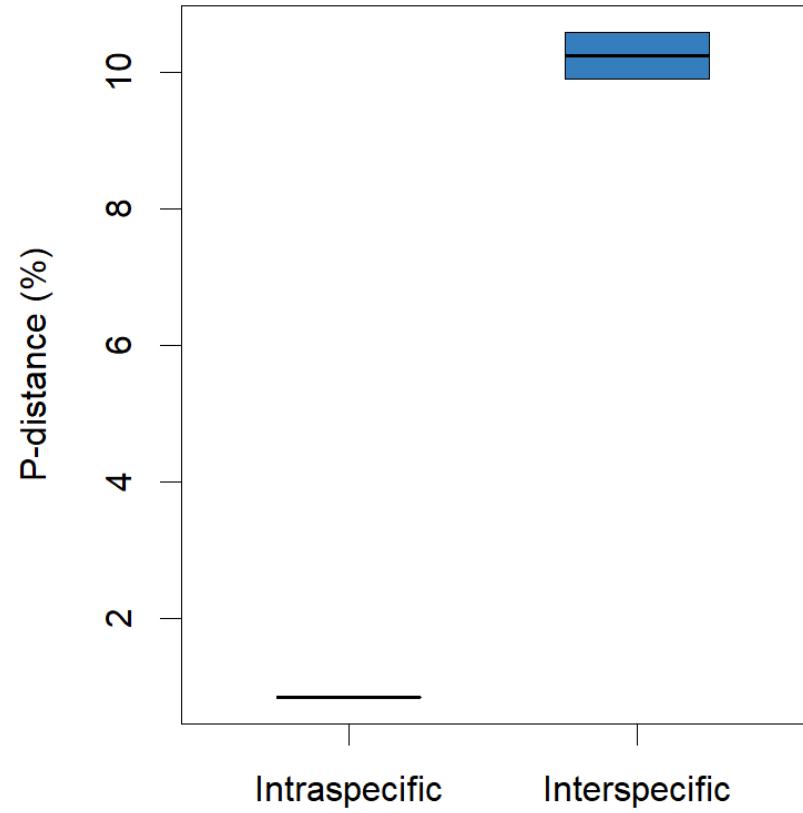

*Nomada*

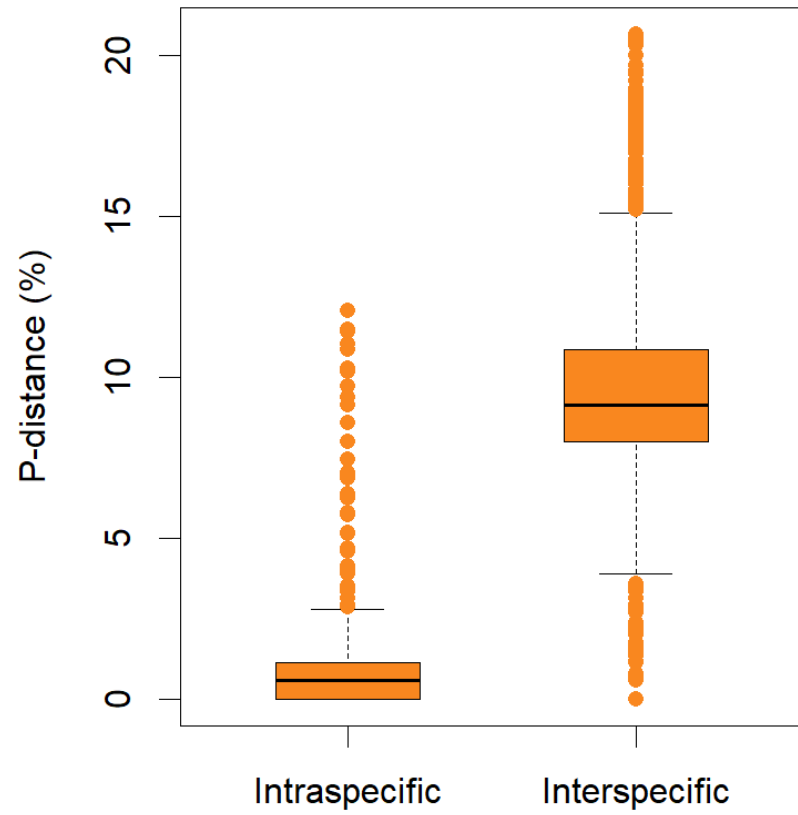

*Nomada*

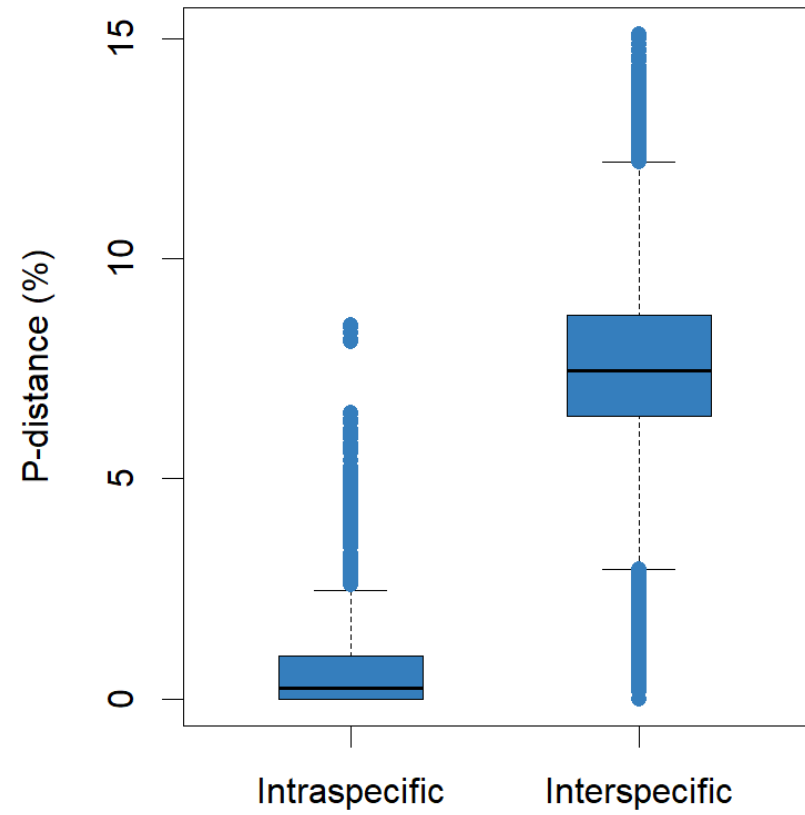

*Paratetrapedia*

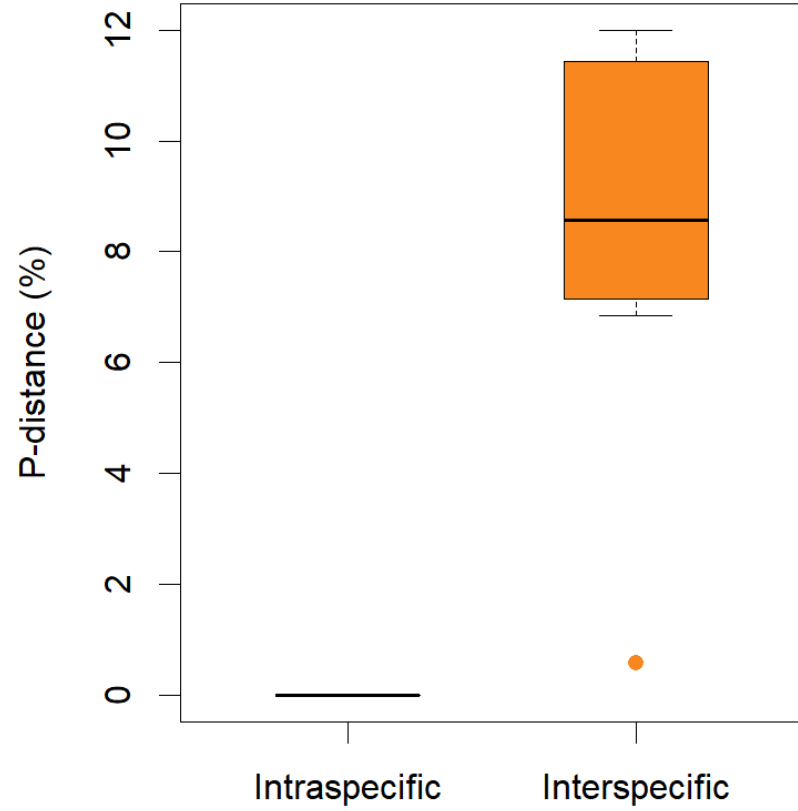

*Paratetrapedia*

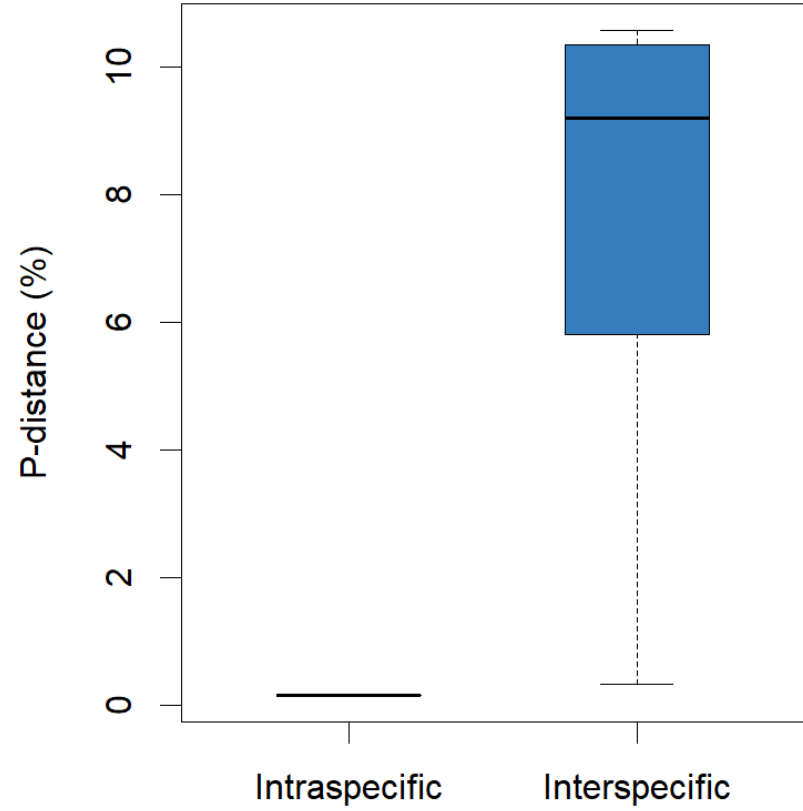

*Partamona*

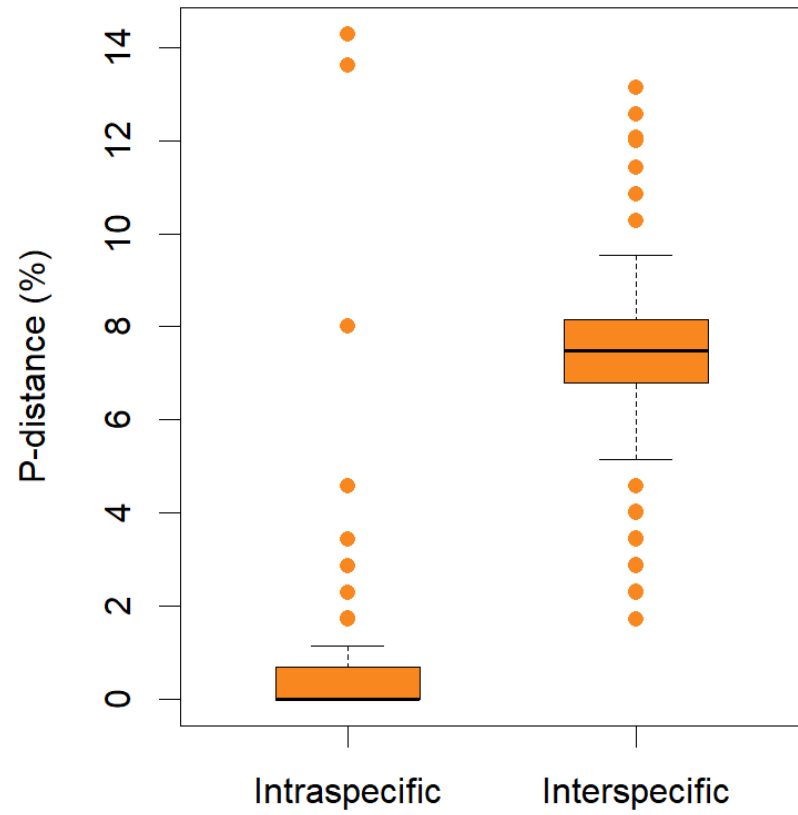

*Partamona*

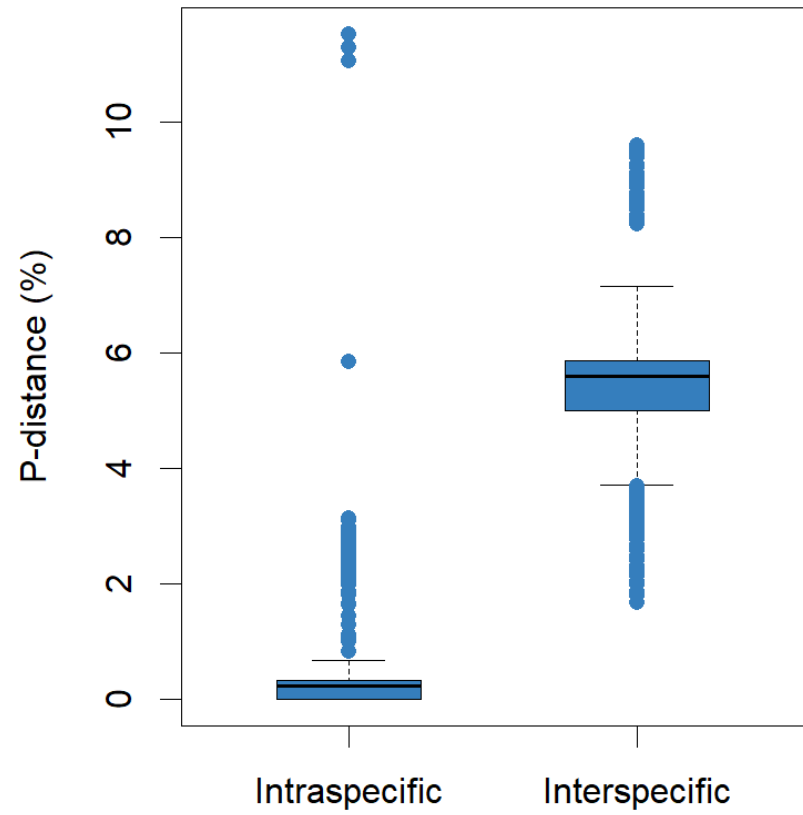

*Plebeia*

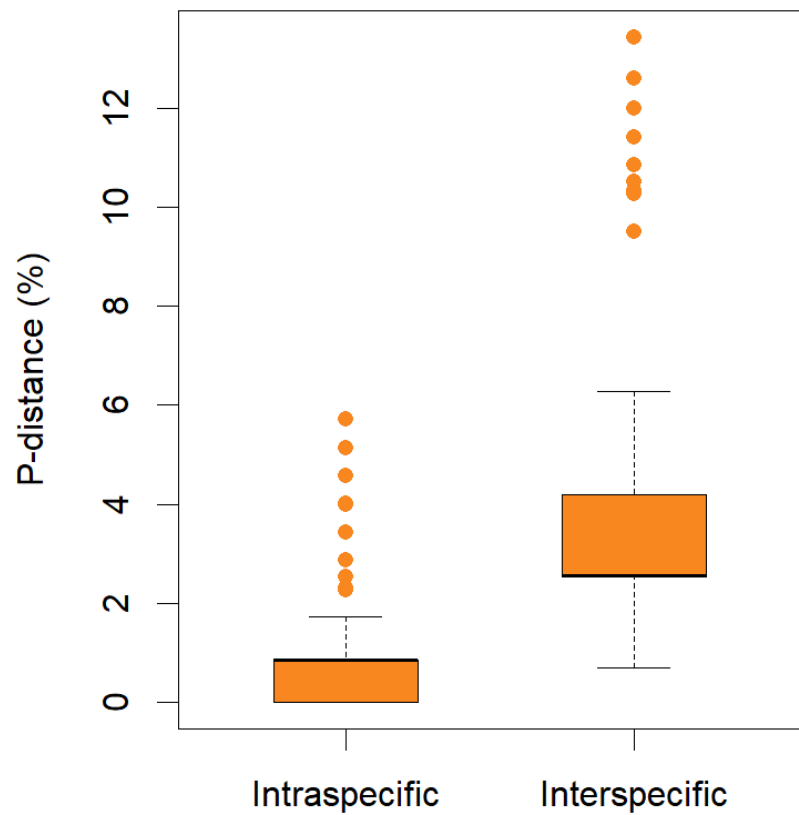

*Plebeia*

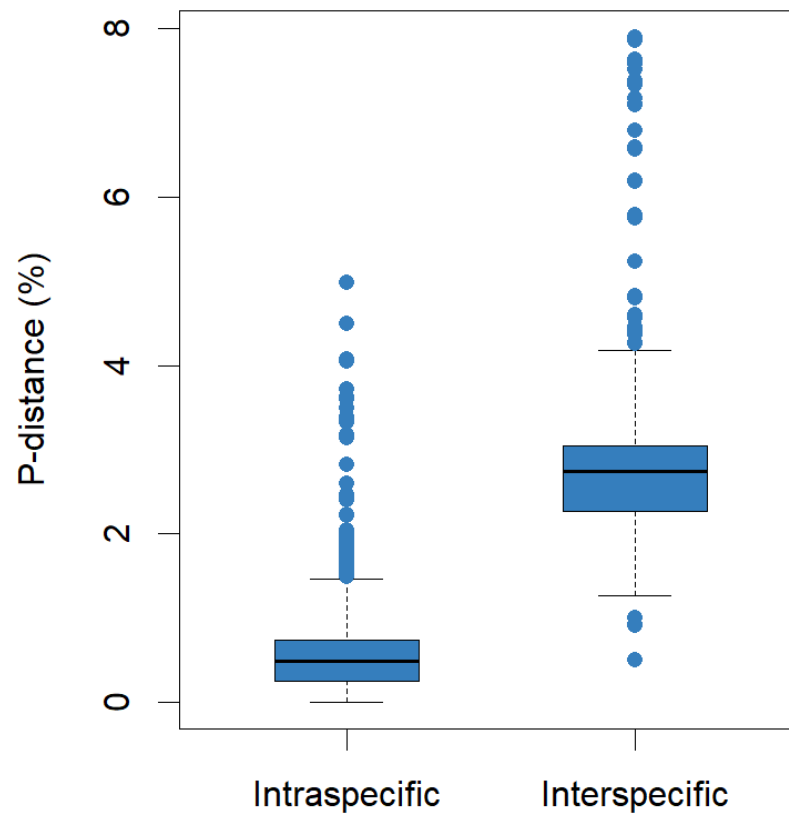

*Ptilothrix*

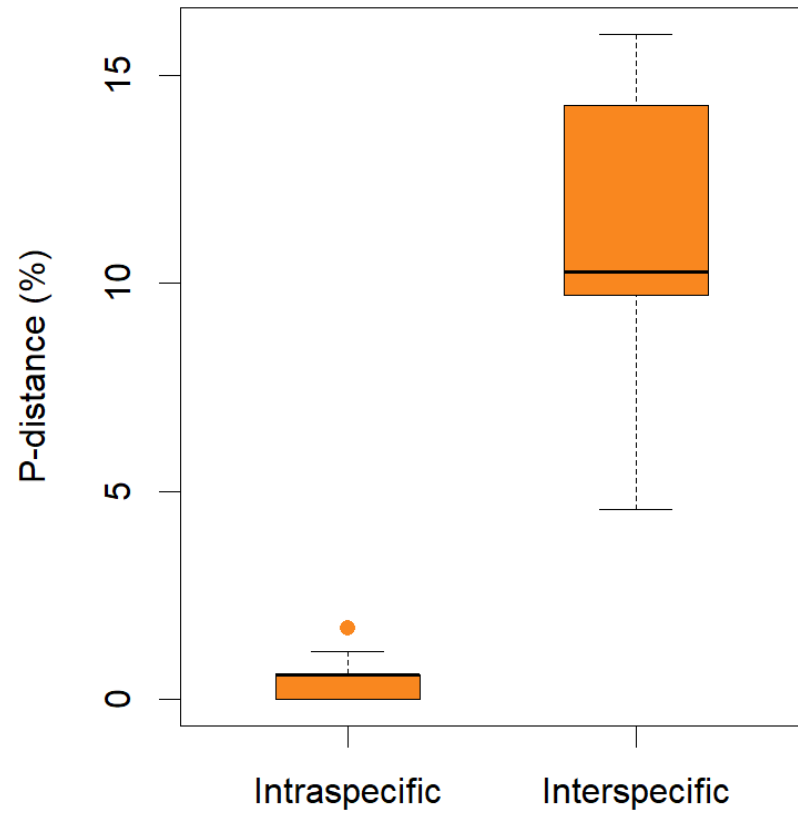

*Ptilothrix*

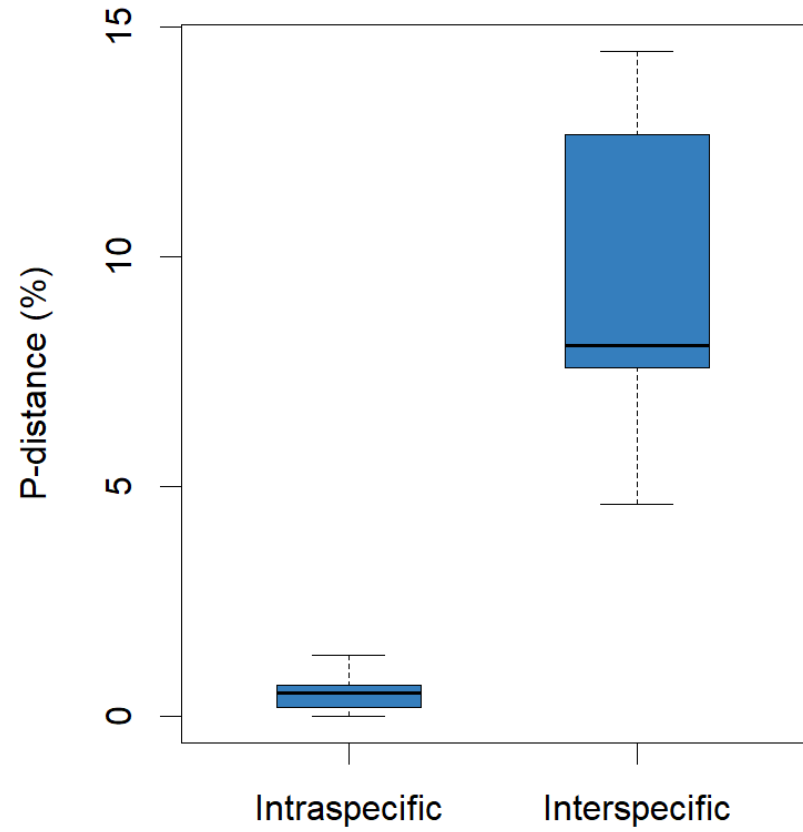

*Scaptotrigona*

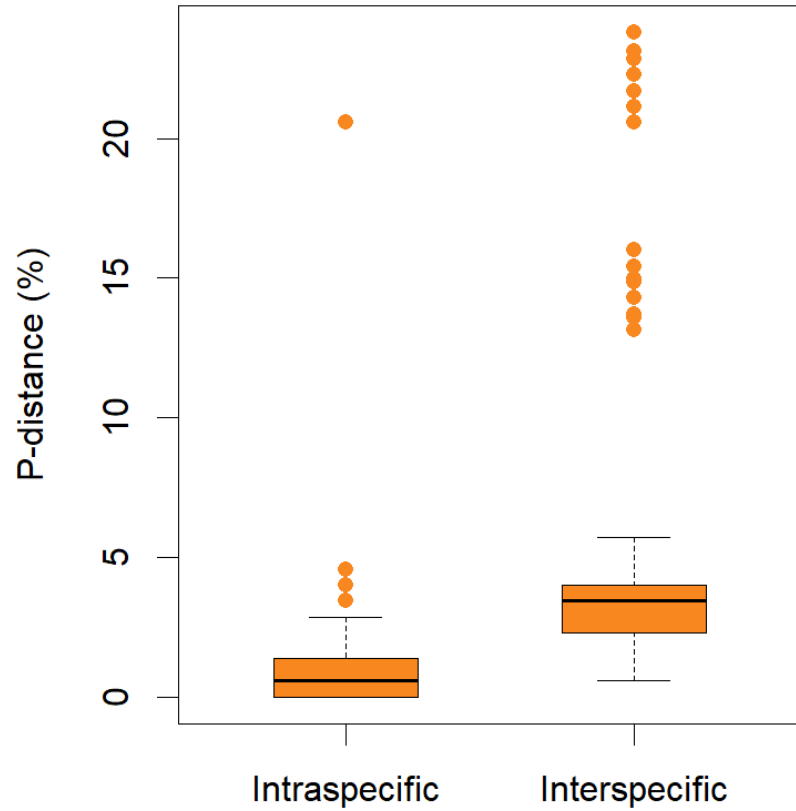

*Scaptotrigona*

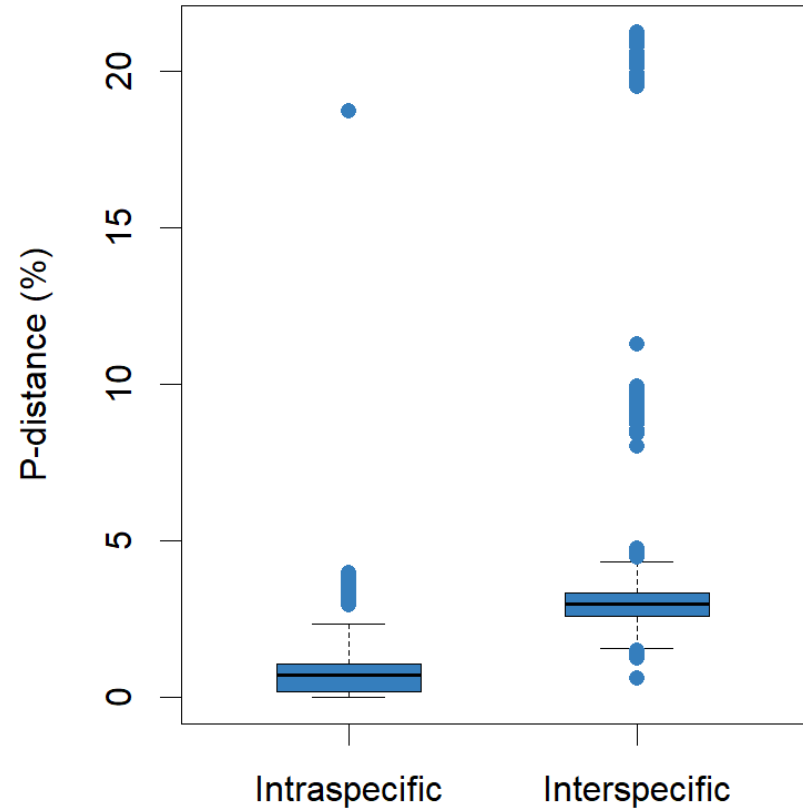



*Scaura*

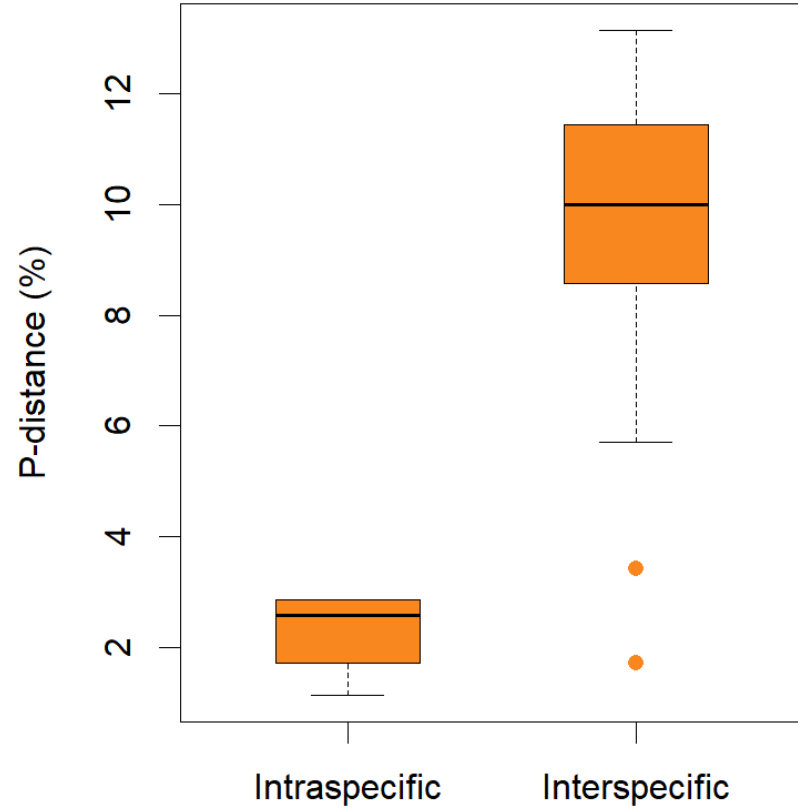

*Scaura*

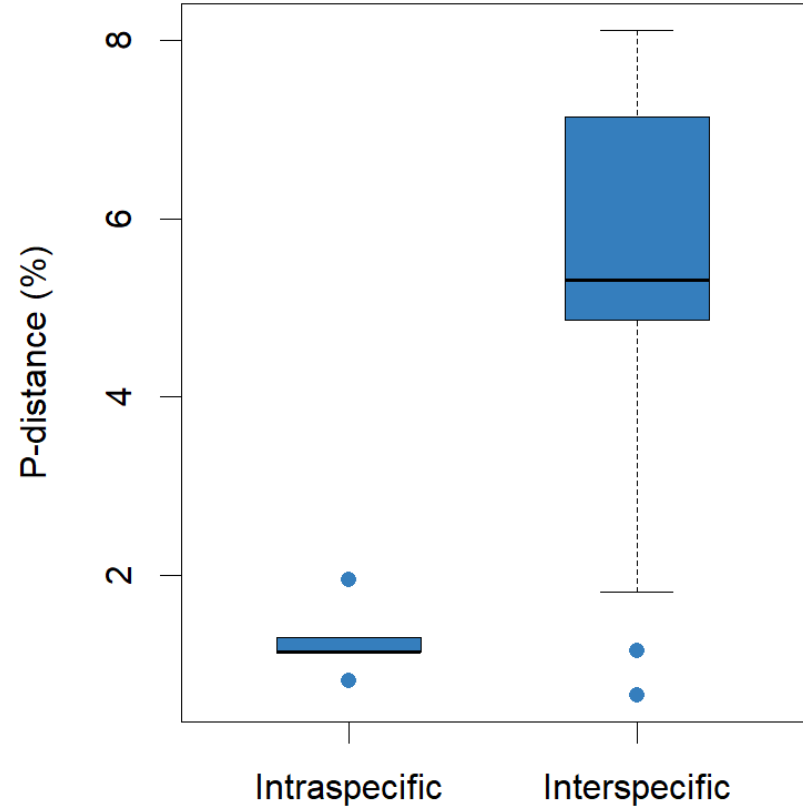

*Svastra*

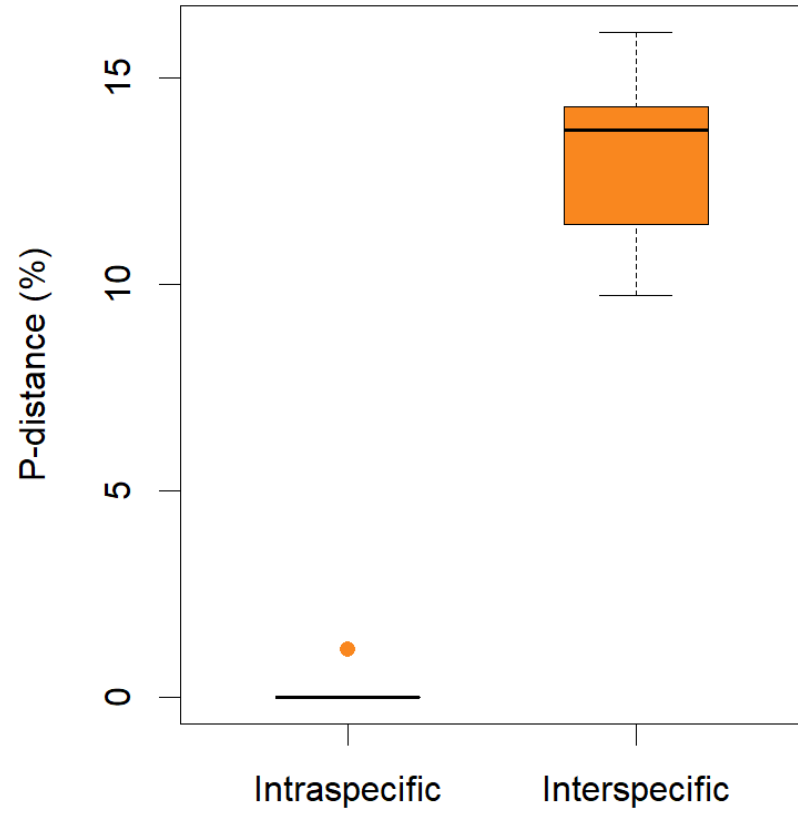

*Svastra*

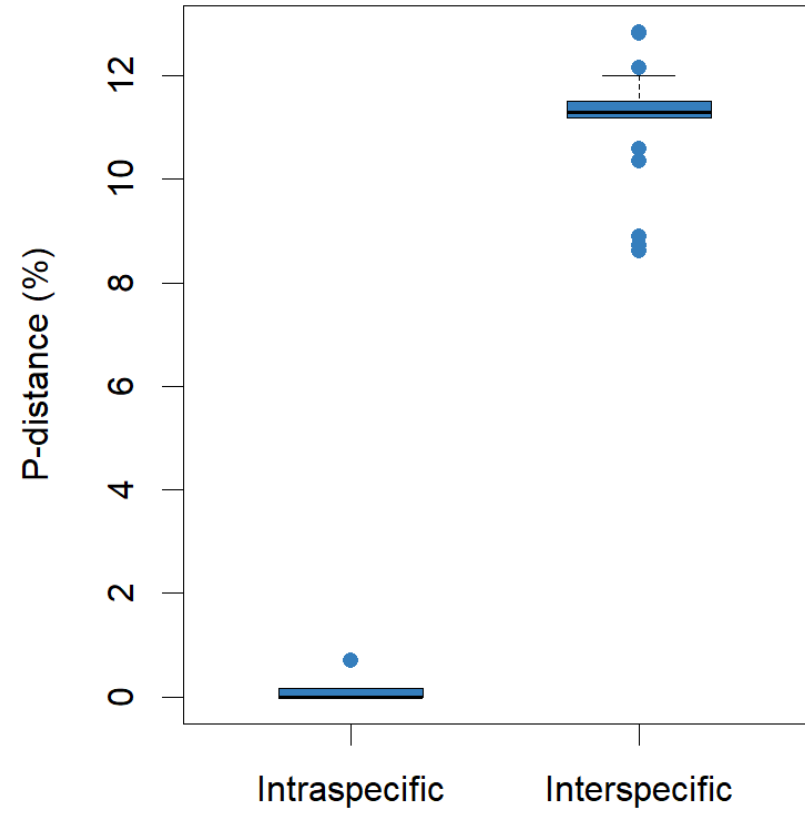

*Tetragona*

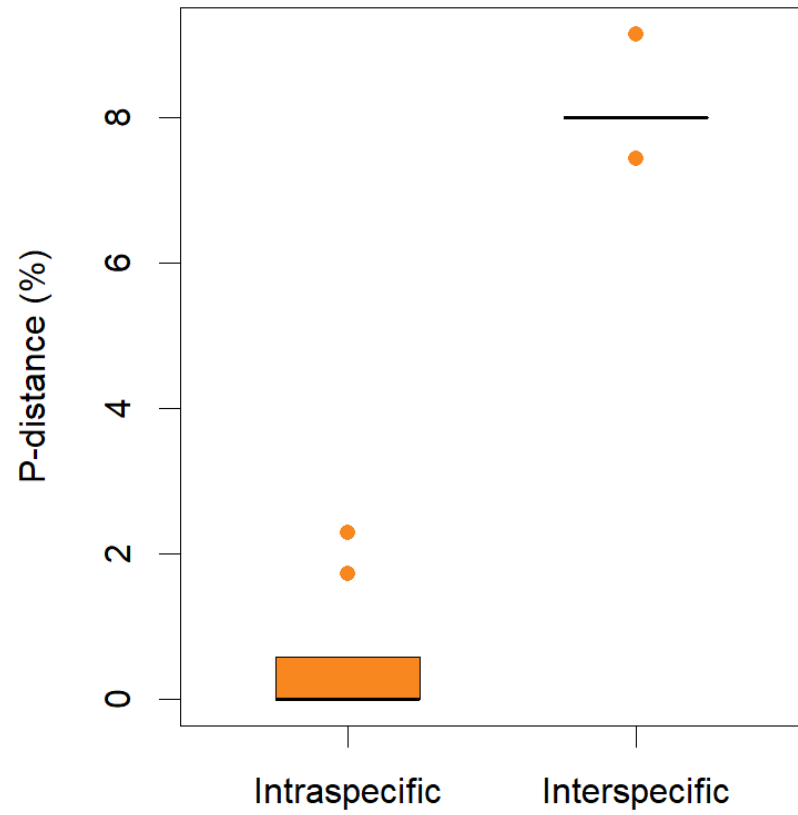

*Tetragona*

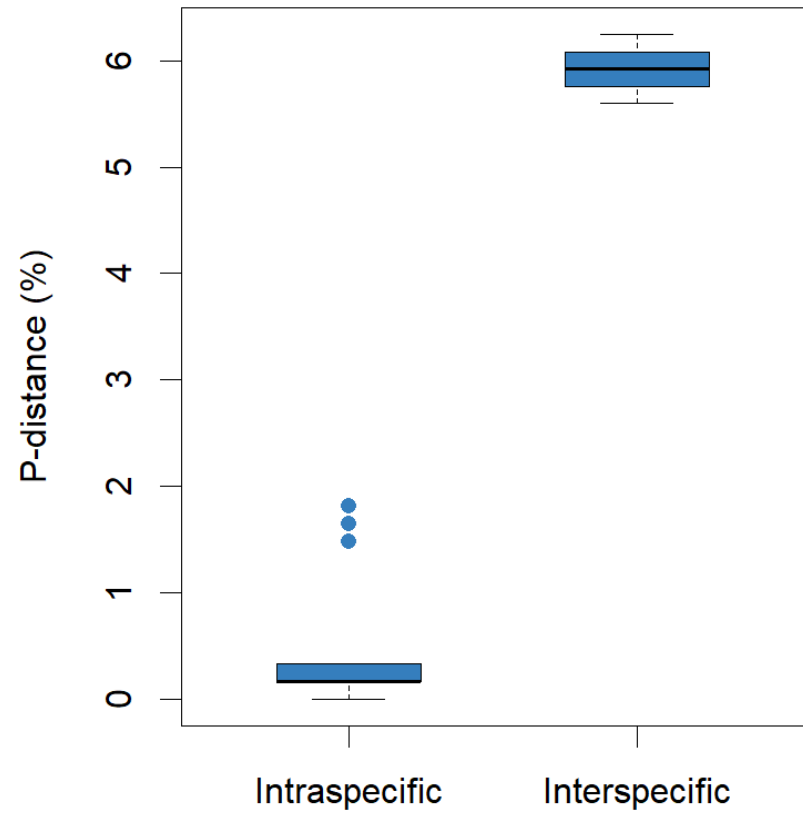

*Tetragonisca*

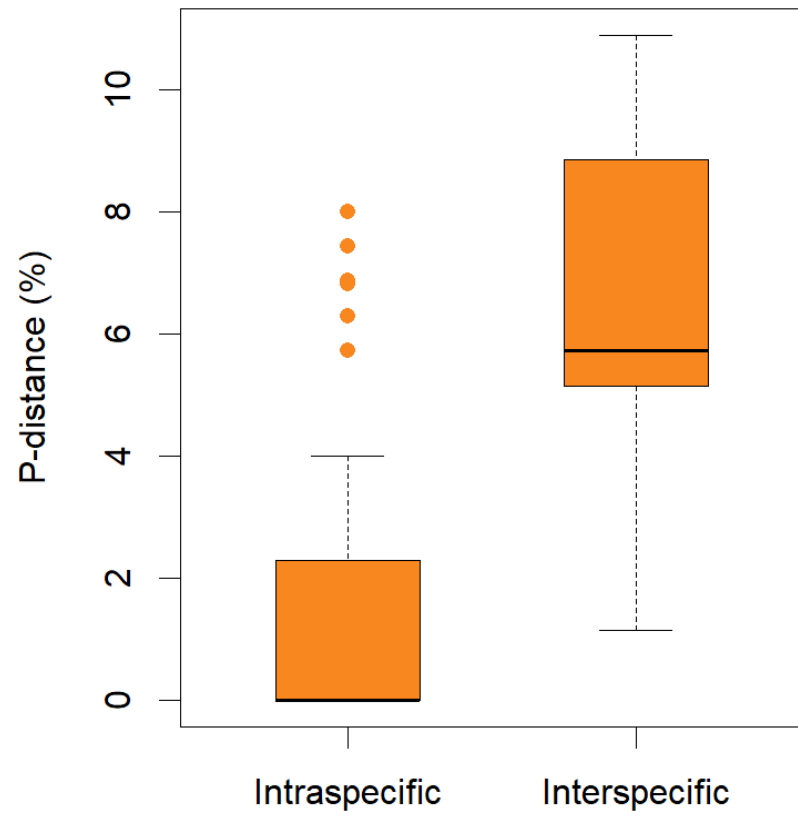

*Tetragonisca*

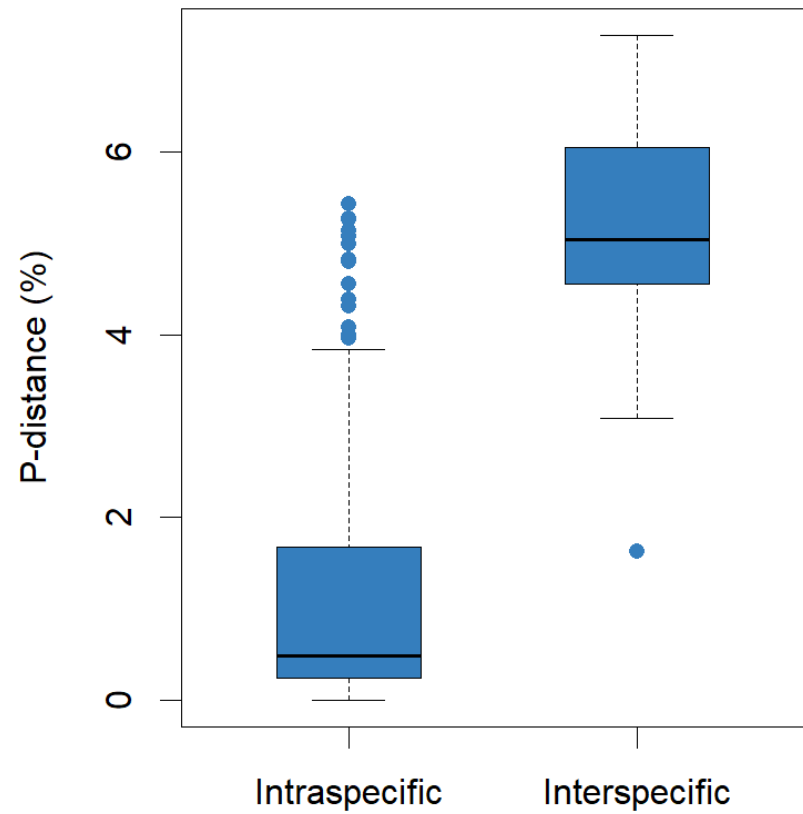

*Thygater*

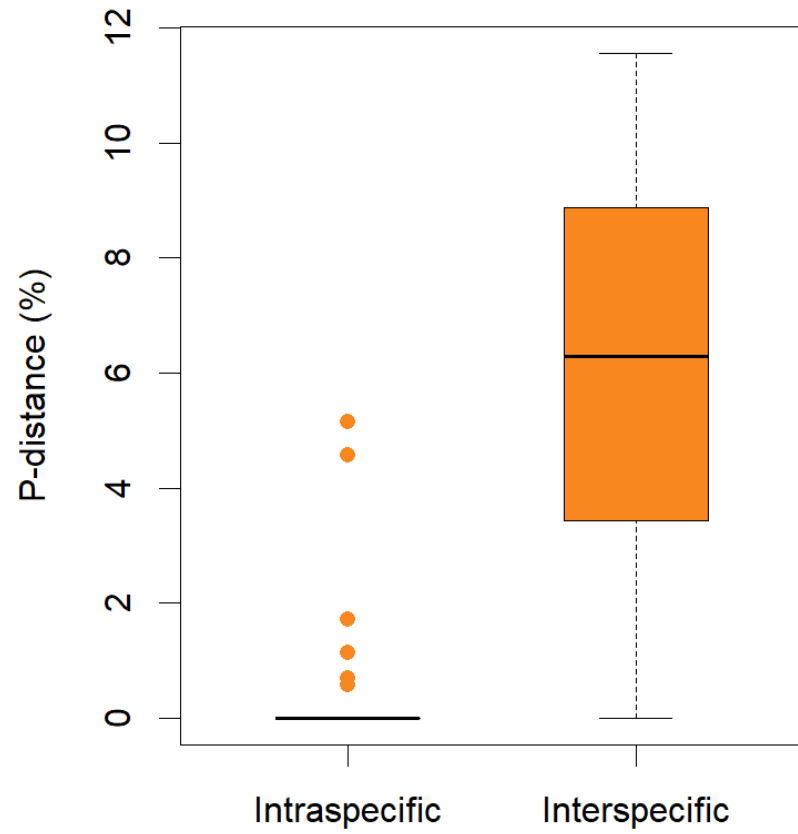

*Thygater*

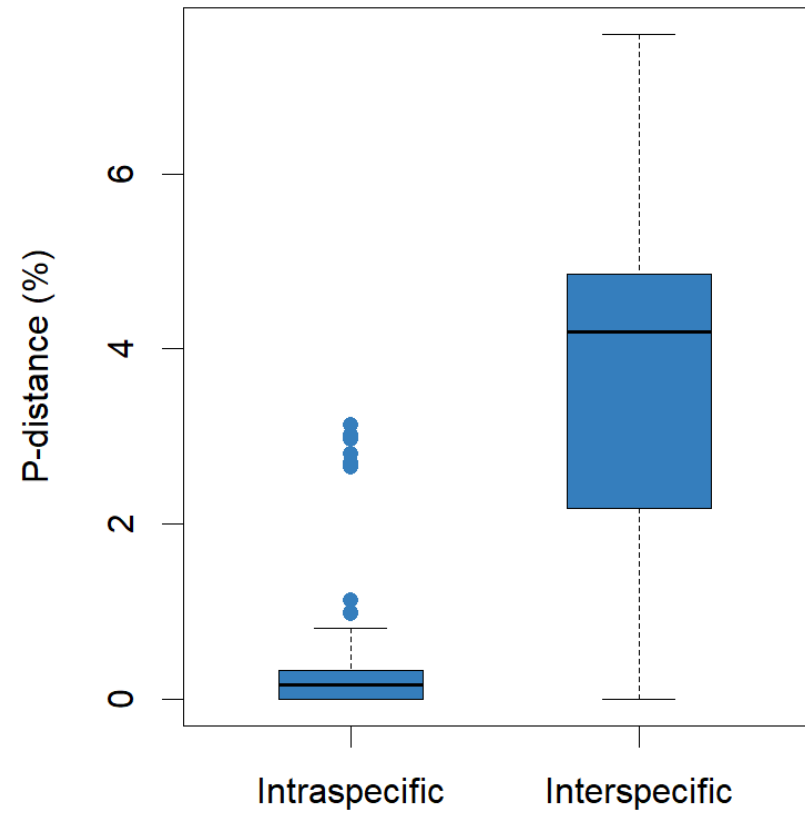

*Thyreus*

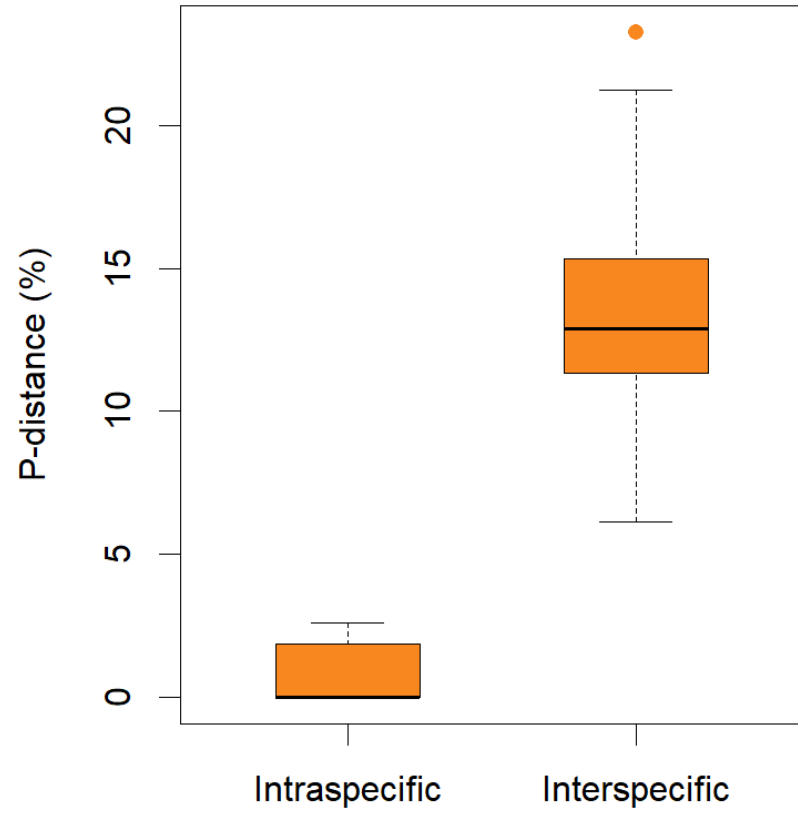

*Thyreus*

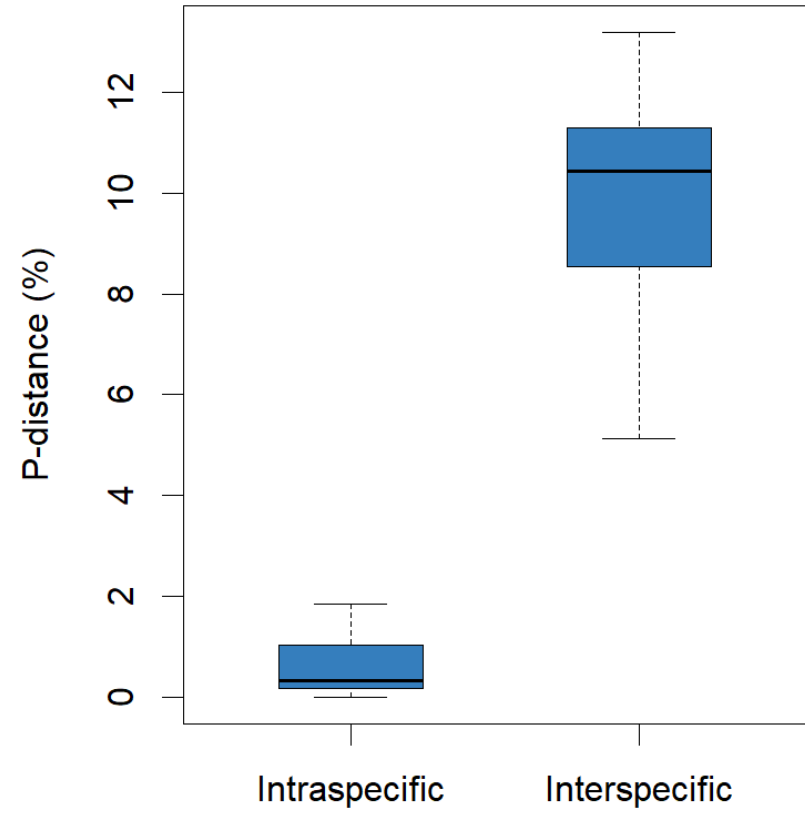

*Triepeolus*

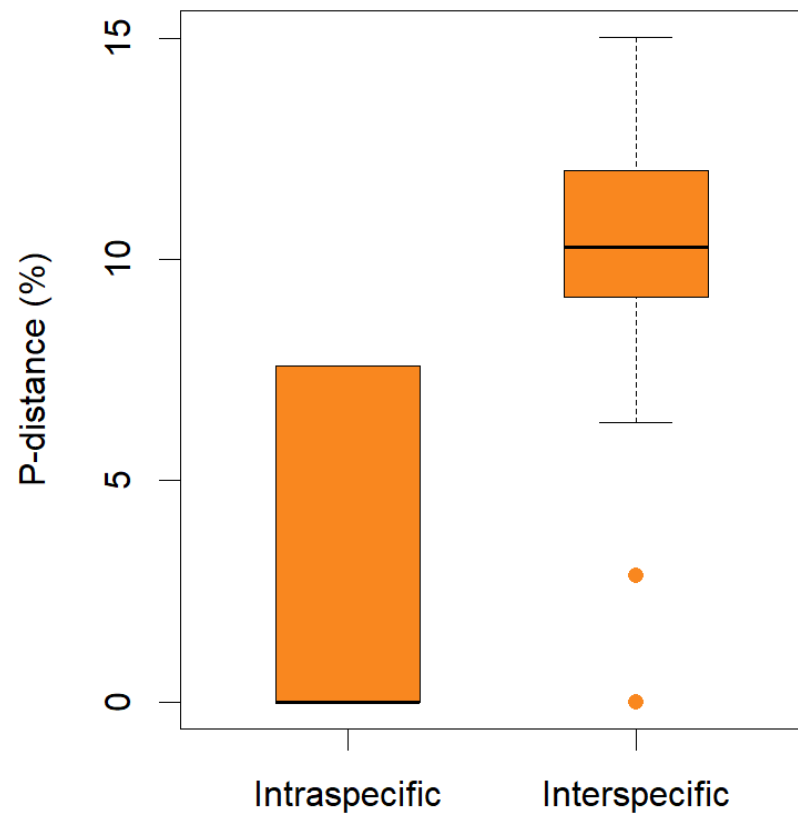

*Triepeolus*

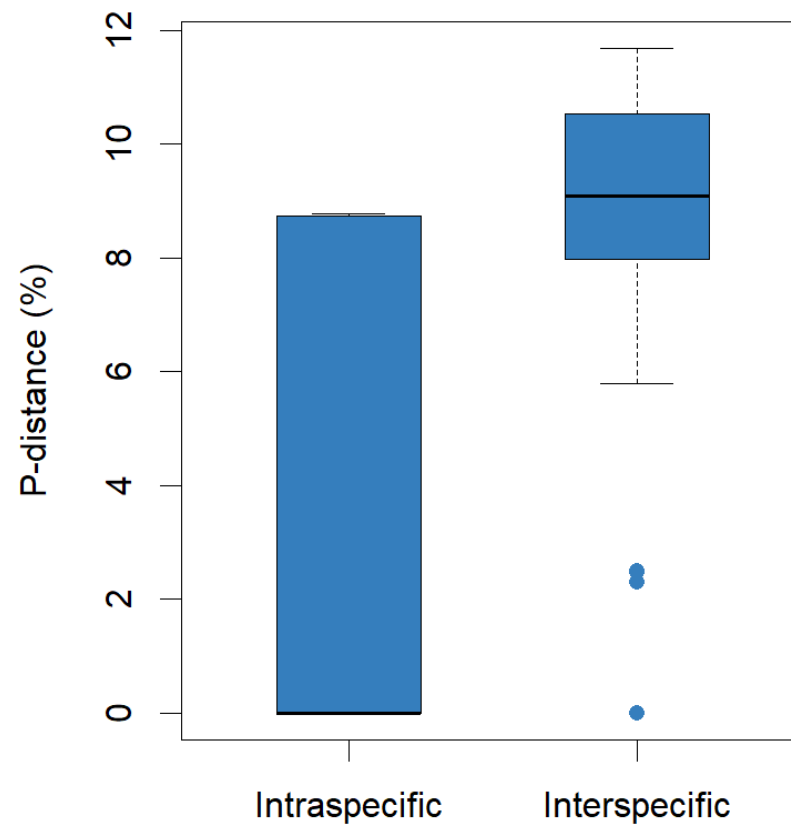

*Trigona*

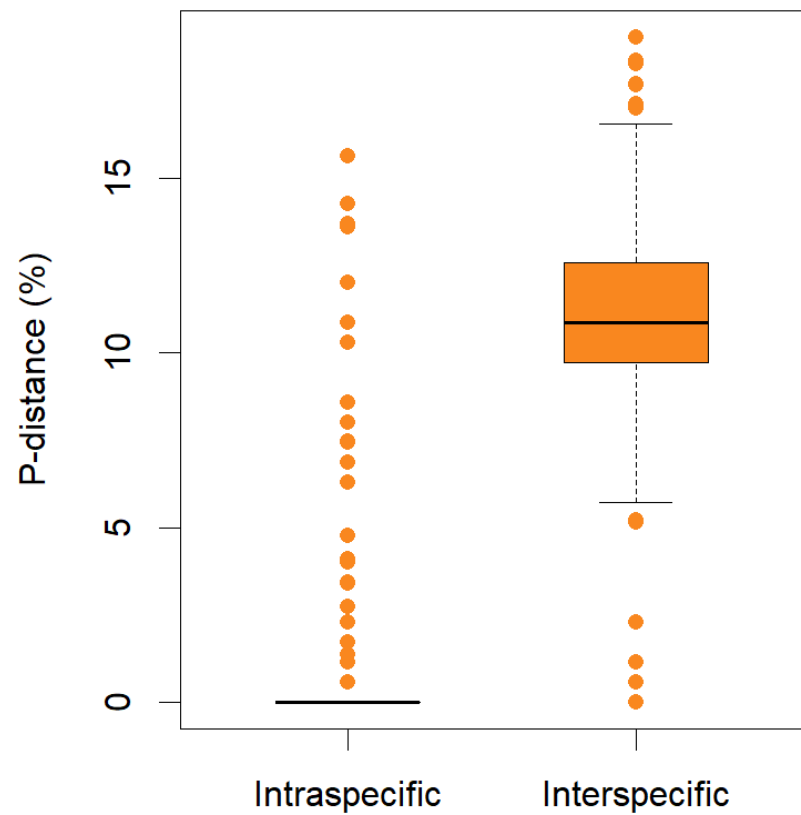

*Trigona*

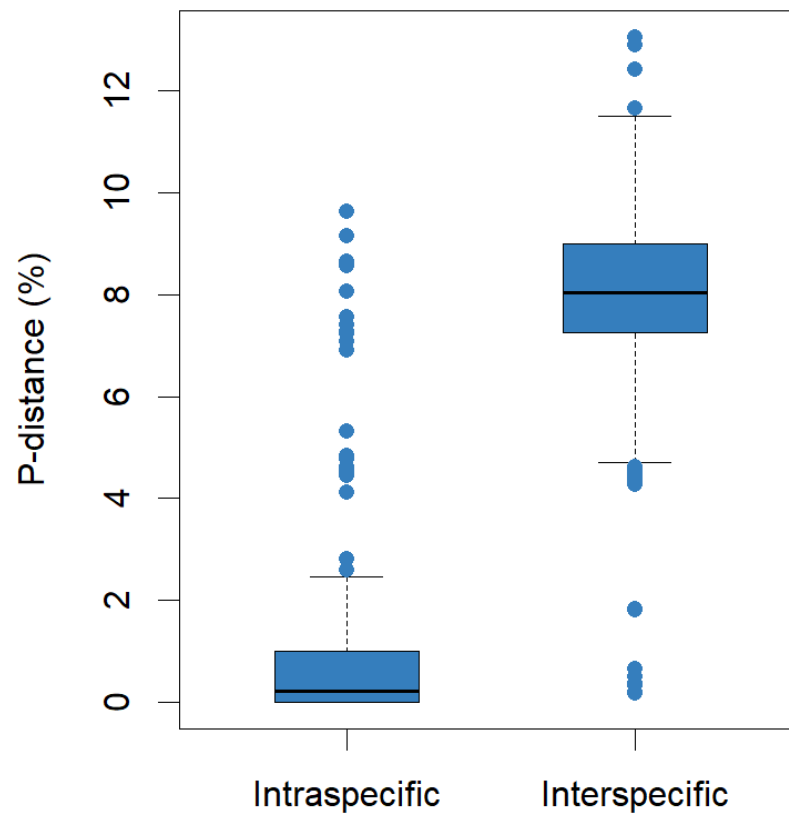



*Xylocopa*

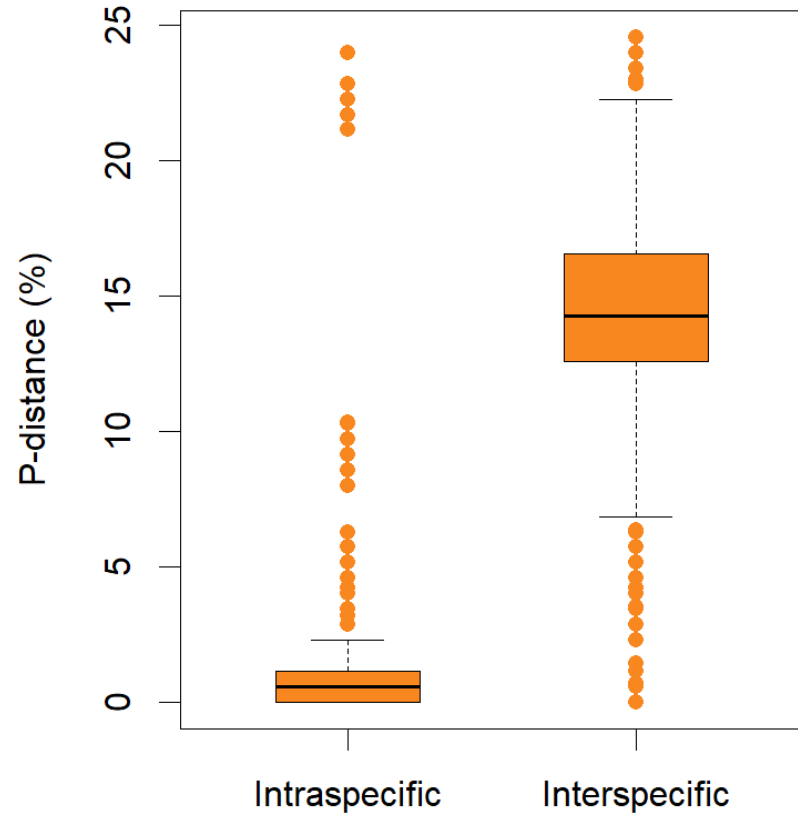

*Xylocopa*

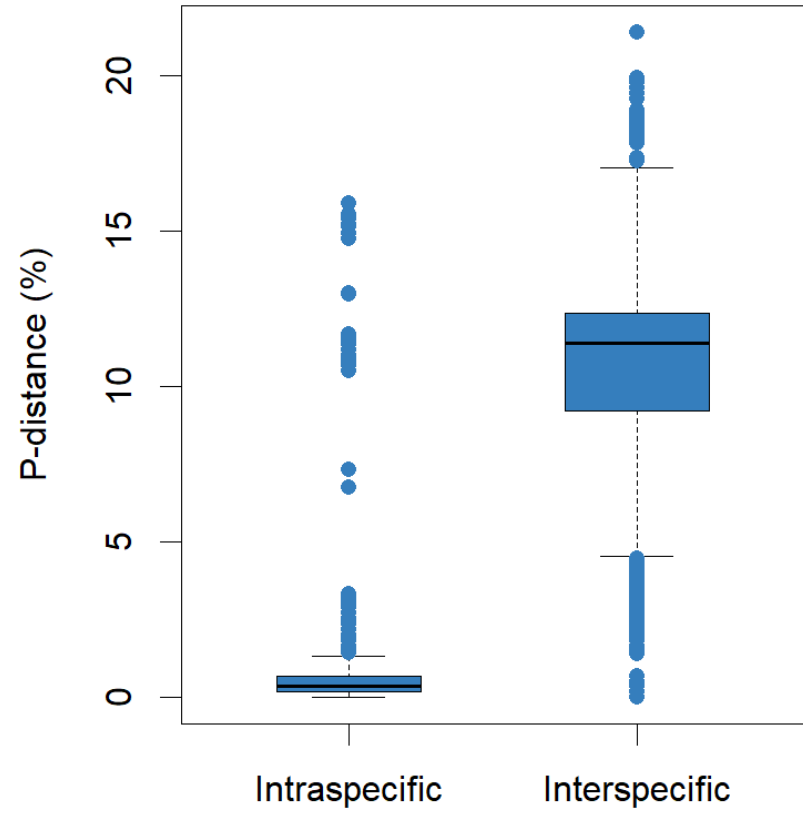

Supplement: MOESM1 [file 13592_2022_958_MOESM1_ESM.pdf]
