# Supplementary material for: Shorter, better, faster, stronger? Comparing the identification performance of full-length and mini-DNA barcodes for apid bees (Hymenoptera: Apidae)
Source: Springer Nature journal article supplement (doi:10.1007/s13592-022-00958-x), 2022-09-09
Supplement: MOESM2 [file 13592_2022_958_MOESM2_ESM.pdf]

**Supplementary Table I** Species list and sequence number recovered to each species and their taxonomic affiliations

| <b>Subfamily</b> | <b>Tribe</b>  | <b>Genus</b>          | <b>Species</b>                      | <b>Authorship</b>                | <b>n</b> |
|------------------|---------------|-----------------------|-------------------------------------|----------------------------------|----------|
| Apinae           | Euglossini    | <i>Aglae</i>          | <i>Aglae caerulea</i>               | Lepeletier & Serville, 1825      | 3        |
| Eucerinae        | Eucerini      | <i>Alloscirtetica</i> | <i>Alloscirtetica gayi</i>          | (Spinola, 1851)                  | 1        |
| Eucerinae        | Eucerini      | <i>Alloscirtetica</i> | <i>Alloscirtetica paraguayensis</i> | (Friese, 1909)                   | 1        |
| Eucerinae        | Eucerini      | <i>Alloscirtetica</i> | <i>Alloscirtetica tristrigata</i>   | (Spinola, 1851)                  | 2        |
| Eucerinae        | Eucerini      | <i>Alloscirtetica</i> | <i>Alloscirtetica weyrauchi</i>     | Michener, LaBerge & Moure, 1955  | 1        |
| Anthophorinae    | Anthophorini  | <i>Amegilla</i>       | <i>Amegilla acraensis</i>           | (Fabricius, 1793)                | 1        |
| Anthophorinae    | Anthophorini  | <i>Amegilla</i>       | <i>Amegilla adelaidae</i>           | (Cockerell, 1905)                | 2        |
| Anthophorinae    | Anthophorini  | <i>Amegilla</i>       | <i>Amegilla aeruginosa</i>          | (Smith, 1854)                    | 6        |
| Anthophorinae    | Anthophorini  | <i>Amegilla</i>       | <i>Amegilla alpha</i>               | (Cockerell, 1904)                | 2        |
| Anthophorinae    | Anthophorini  | <i>Amegilla</i>       | <i>Amegilla asserta</i>             | (Cockerell, 1926)                | 9        |
| Anthophorinae    | Anthophorini  | <i>Amegilla</i>       | <i>Amegilla calceifera</i>          | (Cockerell, 1911)                | 10       |
| Anthophorinae    | Anthophorini  | <i>Amegilla</i>       | <i>Amegilla calens</i>              | (Lepeletier, 1841)               | 1        |
| Anthophorinae    | Anthophorini  | <i>Amegilla</i>       | <i>Amegilla cingulata</i>           | (Fabricius, 1775)                | 5        |
| Anthophorinae    | Anthophorini  | <i>Amegilla</i>       | <i>Amegilla dulcifera</i>           | (Cockerell, 1926)                | 4        |
| Anthophorinae    | Anthophorini  | <i>Amegilla</i>       | <i>Amegilla florea</i>              | (Smith, 1879)                    | 1        |
| Anthophorinae    | Anthophorini  | <i>Amegilla</i>       | <i>Amegilla indistincta</i>         | Leijs, Batley & Hogendoorn, 2017 | 2        |
| Anthophorinae    | Anthophorini  | <i>Amegilla</i>       | <i>Amegilla karlba</i>              | Leijs, Batley & Hogendoorn, 2017 | 1        |
| Anthophorinae    | Anthophorini  | <i>Amegilla</i>       | <i>Amegilla mcnamarae</i>           | (Cockerell, 1929)                | 1        |
| Anthophorinae    | Anthophorini  | <i>Amegilla</i>       | <i>Amegilla murrayensis</i>         | (Rayment, 1935)                  | 21       |
| Anthophorinae    | Anthophorini  | <i>Amegilla</i>       | <i>Amegilla nubica</i>              | (Lepeletier, 1841)               | 1        |
| Anthophorinae    | Anthophorini  | <i>Amegilla</i>       | <i>Amegilla paeninsulae</i>         | Leijs, Batley & Hogendoorn, 2017 | 4        |
| Anthophorinae    | Anthophorini  | <i>Amegilla</i>       | <i>Amegilla pulchra</i>             | (Smith, 1854)                    | 41       |
| Anthophorinae    | Anthophorini  | <i>Amegilla</i>       | <i>Amegilla quadrifasciata</i>      | (de Villers, 1789)               | 2        |
| Anthophorinae    | Anthophorini  | <i>Amegilla</i>       | <i>Amegilla thorogoodi</i>          | (Rayment, 1939)                  | 4        |
| Anthophorinae    | Anthophorini  | <i>Amegilla</i>       | <i>Amegilla viridicingulata</i>     | Leijs, Batley & Hogendoorn, 2017 | 1        |
| Anthophorinae    | Anthophorini  | <i>Amegilla</i>       | <i>Amegilla walkeri</i>             | (Cockerell, 1905)                | 8        |
| Nomadinae        | Ammobatoidini | <i>Ammobatoides</i>   | <i>Ammobatoides abdominalis</i>     | (Eversmann 1852)                 | 2        |

|               |                |                     |                                   |                              |    |
|---------------|----------------|---------------------|-----------------------------------|------------------------------|----|
| Nomadinae     | Ammobatoideini | <i>Ammobatoides</i> | <i>Ammobatoides radoszkowskii</i> | Proshchalykin & Lelej, 2014  | 1  |
| Anthophorinae | Anthophorini   | <i>Anthophora</i>   | <i>Anthophora abroniae</i>        | Timberlake, 1937             | 1  |
| Anthophorinae | Anthophorini   | <i>Anthophora</i>   | <i>Anthophora abrupta</i>         | Say, 1837                    | 6  |
| Anthophorinae | Anthophorini   | <i>Anthophora</i>   | <i>Anthophora aestivalis</i>      | (Panzer, 1801)               | 13 |
| Anthophorinae | Anthophorini   | <i>Anthophora</i>   | <i>Anthophora albata</i>          | Cresson, 1876                | 1  |
| Anthophorinae | Anthophorini   | <i>Anthophora</i>   | <i>Anthophora balneorum</i>       | Lepeletier, 1841             | 2  |
| Anthophorinae | Anthophorini   | <i>Anthophora</i>   | <i>Anthophora beijingensis</i>    | (Wu, 1986)                   | 1  |
| Anthophorinae | Anthophorini   | <i>Anthophora</i>   | <i>Anthophora bimaculata</i>      | (Panzer, 1798)               | 19 |
| Anthophorinae | Anthophorini   | <i>Anthophora</i>   | <i>Anthophora bomboides</i>       | Kirby, 1837                  | 15 |
| Anthophorinae | Anthophorini   | <i>Anthophora</i>   | <i>Anthophora californica</i>     | Cresson, 1869                | 7  |
| Anthophorinae | Anthophorini   | <i>Anthophora</i>   | <i>Anthophora centriformis</i>    | Cresson, 1879                | 3  |
| Anthophorinae | Anthophorini   | <i>Anthophora</i>   | <i>Anthophora cockerelli</i>      | Timberlake, 1937             | 1  |
| Anthophorinae | Anthophorini   | <i>Anthophora</i>   | <i>Anthophora columbariae</i>     | Timberlake & Cockerell, 1937 | 1  |
| Anthophorinae | Anthophorini   | <i>Anthophora</i>   | <i>Anthophora crinipes</i>        | Smith, 1854                  | 1  |
| Anthophorinae | Anthophorini   | <i>Anthophora</i>   | <i>Anthophora curta</i>           | Provancher, 1895             | 1  |
| Anthophorinae | Anthophorini   | <i>Anthophora</i>   | <i>Anthophora edwardsii</i>       | Cresson, 1879                | 1  |
| Anthophorinae | Anthophorini   | <i>Anthophora</i>   | <i>Anthophora estebana</i>        | Cockerell, 1923              | 1  |
| Anthophorinae | Anthophorini   | <i>Anthophora</i>   | <i>Anthophora exigua</i>          | Cresson, 1879                | 2  |
| Anthophorinae | Anthophorini   | <i>Anthophora</i>   | <i>Anthophora flavocincta</i>     | Huard, 1897                  | 1  |
| Anthophorinae | Anthophorini   | <i>Anthophora</i>   | <i>Anthophora fulvicauda</i>      | Timberlake, 1937             | 1  |
| Anthophorinae | Anthophorini   | <i>Anthophora</i>   | <i>Anthophora furcata</i>         | (Panzer, 1798)               | 43 |
| Anthophorinae | Anthophorini   | <i>Anthophora</i>   | <i>Anthophora hololeuca</i>       | Cockerell, 1923              | 1  |
| Anthophorinae | Anthophorini   | <i>Anthophora</i>   | <i>Anthophora maculifrons</i>     | Cresson, 1879                | 1  |
| Anthophorinae | Anthophorini   | <i>Anthophora</i>   | <i>Anthophora montana</i>         | Cresson, 1869                | 2  |
| Anthophorinae | Anthophorini   | <i>Anthophora</i>   | <i>Anthophora mortuaria</i>       | Timberlake, 1937             | 1  |
| Anthophorinae | Anthophorini   | <i>Anthophora</i>   | <i>Anthophora occidentalis</i>    | Cresson, 1869                | 4  |
| Anthophorinae | Anthophorini   | <i>Anthophora</i>   | <i>Anthophora pachyodonta</i>     | Cockerell, 1923              | 1  |
| Anthophorinae | Anthophorini   | <i>Anthophora</i>   | <i>Anthophora pacifica</i>        | Cresson, 1879                | 1  |
| Anthophorinae | Anthophorini   | <i>Anthophora</i>   | <i>Anthophora petrophila</i>      | Cockerell, 1905              | 1  |
| Anthophorinae | Anthophorini   | <i>Anthophora</i>   | <i>Anthophora phenax</i>          | (Cockerell, 1898)            | 1  |

|               |                 |                     |                                  |                                      |      |
|---------------|-----------------|---------------------|----------------------------------|--------------------------------------|------|
| Anthophorinae | Anthophorini    | <i>Anthophora</i>   | <i>Anthophora plagiata</i>       | (Illiger, 1806)                      | 8    |
| Anthophorinae | Anthophorini    | <i>Anthophora</i>   | <i>Anthophora plumipes</i>       | (Pallas, 1772)                       | 34   |
| Anthophorinae | Anthophorini    | <i>Anthophora</i>   | <i>Anthophora porterae</i>       | Cockerell, 1900                      | 3    |
| Anthophorinae | Anthophorini    | <i>Anthophora</i>   | <i>Anthophora pubescens</i>      | (Fabricius, 1781)                    | 15   |
| Anthophorinae | Anthophorini    | <i>Anthophora</i>   | <i>Anthophora quadrimaculata</i> | (Panzer, 1798)                       | 9    |
| Anthophorinae | Anthophorini    | <i>Anthophora</i>   | <i>Anthophora retusa</i>         | (Linnaeus, 1758)                     | 8    |
| Anthophorinae | Anthophorini    | <i>Anthophora</i>   | <i>Anthophora squammulosa</i>    | Dours, 1869                          | 2    |
| Anthophorinae | Anthophorini    | <i>Anthophora</i>   | <i>Anthophora striata</i>        | Orr, 2018                            | 1    |
| Anthophorinae | Anthophorini    | <i>Anthophora</i>   | <i>Anthophora terminalis</i>     | Cresson, 1869                        | 10   |
| Anthophorinae | Anthophorini    | <i>Anthophora</i>   | <i>Anthophora timberlakei</i>    | Orr, 2018                            | 1    |
| Anthophorinae | Anthophorini    | <i>Anthophora</i>   | <i>Anthophora urbana</i>         | Cresson, 1879                        | 1    |
| Anthophorinae | Anthophorini    | <i>Anthophora</i>   | <i>Anthophora ursina</i>         | Cresson, 1869                        | 5    |
| Anthophorinae | Anthophorini    | <i>Anthophora</i>   | <i>Anthophora vallorum</i>       | (Cockerell, 1896)                    | 1    |
| Anthophorinae | Anthophorini    | <i>Anthophora</i>   | <i>Anthophora vestita</i>        | Smith, 1854                          | 4    |
| Anthophorinae | Anthophorini    | <i>Anthophora</i>   | <i>Anthophora wartmanni</i>      | Friese, 1905                         | 1    |
| Eucerinae     | Exomalopsini    | <i>Anthophorula</i> | <i>Anthophorula compactula</i>   | Cockerell, 1897                      | 2    |
| Eucerinae     | Exomalopsini    | <i>Anthophorula</i> | <i>Anthophorula completa</i>     | (Cockerell, 1935)                    | 1    |
| Eucerinae     | Exomalopsini    | <i>Anthophorula</i> | <i>Anthophorula micheneri</i>    | (Timberlake, 1947)                   | 1    |
| Eucerinae     | Exomalopsini    | <i>Anthophorula</i> | <i>Anthophorula rufiventris</i>  | (Timberlake, 1947)                   | 1    |
| Eucerinae     | Exomalopsini    | <i>Anthophorula</i> | <i>Anthophorula truncata</i>     | González-Vaquero & Roig-Alsina, 2005 | 1    |
| Apinae        | Apini           | <i>Apis</i>         | <i>Apis andreniformis</i>        | Smith, 1858                          | 53   |
| Apinae        | Apini           | <i>Apis</i>         | <i>Apis cerana</i>               | Fabricius 1793                       | 510  |
| Apinae        | Apini           | <i>Apis</i>         | <i>Apis dorsata</i>              | Fabricius, 1793                      | 97   |
| Apinae        | Apini           | <i>Apis</i>         | <i>Apis florea</i>               | Fabricius, 1787                      | 198  |
| Apinae        | Apini           | <i>Apis</i>         | <i>Apis koschevnikovi</i>        | Enderlein, 1906                      | 18   |
| Apinae        | Apini           | <i>Apis</i>         | <i>Apis laboriosa</i>            | Smith, 1871                          | 4    |
| Apinae        | Apini           | <i>Apis</i>         | <i>Apis mellifera</i>            | Linnaeus, 1758                       | 1162 |
| Apinae        | Apini           | <i>Apis</i>         | <i>Apis nigrocincta</i>          | Smith, 1861                          | 21   |
| Eucerinae     | Tapinotaspidini | <i>Arhysoceble</i>  | <i>Arhysoceble huberi</i>        | (Ducke, 1908)                        | 1    |
| Eucerinae     | Tapinotaspidini | <i>Arhysoceble</i>  | <i>Arhysoceble picta</i>         | (Friese, 1899)                       | 2    |

|           |            |                                |                                             |                           |     |
|-----------|------------|--------------------------------|---------------------------------------------|---------------------------|-----|
| Apinae    | Meliponini | <i>Axestotrigona</i>           | <i>Axestotrigona ferruginea</i>             | (Lepeletier, 1836)        | 3   |
| Nomadinae | Biastini   | <i>Biastes</i>                 | <i>Biastes emarginatus</i>                  | (Schenck, 1853)           | 1   |
| Nomadinae | Biastini   | <i>Biastes</i>                 | <i>Biastes truncatus</i>                    | (Nylander, 1848)          | 2   |
| Apinae    | Bombini    | <i>Bombus (Alpigenobombus)</i> | <i>Bombus (Alpigenobombus) breviceps</i>    | Smith, 1852               | 16  |
| Apinae    | Bombini    | <i>Bombus (Alpigenobombus)</i> | <i>Bombus (Alpigenobombus) grahami</i>      | (Frison, 1933)            | 1   |
| Apinae    | Bombini    | <i>Bombus (Alpigenobombus)</i> | <i>Bombus (Alpigenobombus) kashmirensis</i> | Friese, 1909              | 2   |
| Apinae    | Bombini    | <i>Bombus (Alpigenobombus)</i> | <i>Bombus (Alpigenobombus) wurflenii</i>    | Radoszkowski, 1860        | 14  |
| Apinae    | Bombini    | <i>Bombus (Alpinobombus)</i>   | <i>Bombus (Alpinobombus) alpinus</i>        | (Linnaeus, 1758)          | 4   |
| Apinae    | Bombini    | <i>Bombus (Alpinobombus)</i>   | <i>Bombus (Alpinobombus) balteatus</i>      | Dahlbom, 1832             | 8   |
| Apinae    | Bombini    | <i>Bombus (Alpinobombus)</i>   | <i>Bombus (Alpinobombus) hyperboreus</i>    | Schönherr, 1809           | 18  |
| Apinae    | Bombini    | <i>Bombus (Alpinobombus)</i>   | <i>Bombus (Alpinobombus) kirbiellus</i>     | Curtis, 1835              | 12  |
| Apinae    | Bombini    | <i>Bombus (Alpinobombus)</i>   | <i>Bombus (Alpinobombus) kluanensis</i>     | Williams & Cannings, 2016 | 21  |
| Apinae    | Bombini    | <i>Bombus (Alpinobombus)</i>   | <i>Bombus (Alpinobombus) neoboreus</i>      | Sladen, 1919              | 6   |
| Apinae    | Bombini    | <i>Bombus (Alpinobombus)</i>   | <i>Bombus (Alpinobombus) polaris</i>        | Curtis, 1835              | 50  |
| Apinae    | Bombini    | <i>Bombus (Bombias)</i>        | <i>Bombus (Bombias) auricomus</i>           | (Robertson, 1903)         | 4   |
| Apinae    | Bombini    | <i>Bombus (Bombias)</i>        | <i>Bombus (Bombias) confusus</i>            | Schenck, 1859             | 3   |
| Apinae    | Bombini    | <i>Bombus (Bombias)</i>        | <i>Bombus (Bombias) nevadensis</i>          | Cresson, 1874             | 17  |
| Apinae    | Bombini    | <i>Bombus (Bombus)</i>         | <i>Bombus (Bombus) affinis</i>              | Cresson, 1863             | 3   |
| Apinae    | Bombini    | <i>Bombus (Bombus)</i>         | <i>Bombus (Bombus) cryptarum</i>            | (Fabricius, 1775)         | 117 |
| Apinae    | Bombini    | <i>Bombus (Bombus)</i>         | <i>Bombus (Bombus) franklini</i>            | (Frison, 1921)            | 1   |
| Apinae    | Bombini    | <i>Bombus (Bombus)</i>         | <i>Bombus (Bombus) hypocrita</i>            | Pérez, 1905               | 119 |
| Apinae    | Bombini    | <i>Bombus (Bombus)</i>         | <i>Bombus (Bombus) ignitus</i>              | Smith, 1869               | 247 |
| Apinae    | Bombini    | <i>Bombus (Bombus)</i>         | <i>Bombus (Bombus) jacobsoni</i>            | Skorikov, 1912            | 3   |
| Apinae    | Bombini    | <i>Bombus (Bombus)</i>         | <i>Bombus (Bombus) lantschouensis</i>       | Vogt, 1908                | 33  |
| Apinae    | Bombini    | <i>Bombus (Bombus)</i>         | <i>Bombus (Bombus) longipennis</i>          | Friese, 1918              | 24  |
| Apinae    | Bombini    | <i>Bombus (Bombus)</i>         | <i>Bombus (Bombus) lucorum</i>              | (Linnaeus, 1761)          | 188 |
| Apinae    | Bombini    | <i>Bombus (Bombus)</i>         | <i>Bombus (Bombus) magnus</i>               | (Vogt, 1911)              | 40  |
| Apinae    | Bombini    | <i>Bombus (Bombus)</i>         | <i>Bombus (Bombus) minshanensis</i>         | Bischoff, 1936            | 10  |
| Apinae    | Bombini    | <i>Bombus (Bombus)</i>         | <i>Bombus (Bombus) occidentalis</i>         | Greene, 1858              | 119 |
| Apinae    | Bombini    | <i>Bombus (Bombus)</i>         | <i>Bombus (Bombus) patagiatus</i>           | Nylander, 1848            | 42  |

|        |         |                                 |                                                |                        |     |
|--------|---------|---------------------------------|------------------------------------------------|------------------------|-----|
| Apinae | Bombini | <i>Bombus (Bombus)</i>          | <i>Bombus (Bombus) sporadicus</i>              | Nylander, 1848         | 21  |
| Apinae | Bombini | <i>Bombus (Bombus)</i>          | <i>Bombus (Bombus) terrestris</i>              | (Linnaeus, 1758)       | 346 |
| Apinae | Bombini | <i>Bombus (Bombus)</i>          | <i>Bombus (Bombus) terricola</i>               | Kirby, 1837            | 81  |
| Apinae | Bombini | <i>Bombus (Bombus)</i>          | <i>Bombus (Bombus) tunicatus</i>               | Smith, 1852            | 5   |
| Apinae | Bombini | <i>Bombus (Cullumanobombus)</i> | <i>Bombus (Cullumanobombus) brachycephalus</i> | Handlirsch 1888        | 3   |
| Apinae | Bombini | <i>Bombus (Cullumanobombus)</i> | <i>Bombus (Cullumanobombus) crotchii</i>       | Cresson, 1878          | 4   |
| Apinae | Bombini | <i>Bombus (Cullumanobombus)</i> | <i>Bombus (Cullumanobombus) cullumanus</i>     | (Kirby, 1802)          | 34  |
| Apinae | Bombini | <i>Bombus (Cullumanobombus)</i> | <i>Bombus (Cullumanobombus) fraternus</i>      | (Smith, 1854)          | 2   |
| Apinae | Bombini | <i>Bombus (Cullumanobombus)</i> | <i>Bombus (Cullumanobombus) funebris</i>       | Smith, 1854            | 2   |
| Apinae | Bombini | <i>Bombus (Cullumanobombus)</i> | <i>Bombus (Cullumanobombus) griseocollis</i>   | (DeGeer, 1773)         | 5   |
| Apinae | Bombini | <i>Bombus (Cullumanobombus)</i> | <i>Bombus (Cullumanobombus) macgregori</i>     | Labougle & Ayala, 1985 | 2   |
| Apinae | Bombini | <i>Bombus (Cullumanobombus)</i> | <i>Bombus (Cullumanobombus) melaleucus</i>     | Handlirsch, 1888       | 2   |
| Apinae | Bombini | <i>Bombus (Cullumanobombus)</i> | <i>Bombus (Cullumanobombus) morrisoni</i>      | Cresson, 1878          | 6   |
| Apinae | Bombini | <i>Bombus (Cullumanobombus)</i> | <i>Bombus (Cullumanobombus) rufocinctus</i>    | Cresson, 1863          | 94  |
| Apinae | Bombini | <i>Bombus (Cullumanobombus)</i> | <i>Bombus (Cullumanobombus) semenoviellus</i>  | Skorikov, 1910         | 12  |
| Apinae | Bombini | <i>Bombus (Cullumanobombus)</i> | <i>Bombus (Cullumanobombus) unicus</i>         | Morawitz, 1883         | 3   |
| Apinae | Bombini | <i>Bombus (Kallobombus)</i>     | <i>Bombus (Kallobombus) soroensis</i>          | (Fabricius, 1777)      | 21  |
| Apinae | Bombini | <i>Bombus (Megabombus)</i>      | <i>Bombus (Megabombus) argillaceus</i>         | (Scopoli, 1763)        | 6   |
| Apinae | Bombini | <i>Bombus (Megabombus)</i>      | <i>Bombus (Megabombus) bicoloratus</i>         | Smith, 1879            | 4   |
| Apinae | Bombini | <i>Bombus (Megabombus)</i>      | <i>Bombus (Megabombus) consobrinus</i>         | Dahlbom, 1832          | 47  |
| Apinae | Bombini | <i>Bombus (Megabombus)</i>      | <i>Bombus (Megabombus) czerskii</i>            | Skorikov, 1910         | 2   |
| Apinae | Bombini | <i>Bombus (Megabombus)</i>      | <i>Bombus (Megabombus) diversus</i>            | Smith, 1869            | 9   |
| Apinae | Bombini | <i>Bombus (Megabombus)</i>      | <i>Bombus (Megabombus) gerstaeckeri</i>        | Morawitz, 1881         | 15  |
| Apinae | Bombini | <i>Bombus (Megabombus)</i>      | <i>Bombus (Megabombus) hortorum</i>            | (Linnaeus, 1761)       | 62  |
| Apinae | Bombini | <i>Bombus (Megabombus)</i>      | <i>Bombus (Megabombus) koreanus</i>            | (Skorikov, 1933)       | 11  |
| Apinae | Bombini | <i>Bombus (Megabombus)</i>      | <i>Bombus (Megabombus) longipes</i>            | Friese, 1905           | 1   |
| Apinae | Bombini | <i>Bombus (Megabombus)</i>      | <i>Bombus (Megabombus) portchinsky</i>         | Radoszkowski, 1883     | 2   |
| Apinae | Bombini | <i>Bombus (Megabombus)</i>      | <i>Bombus (Megabombus) religiosus</i>          | (Frison, 1935)         | 2   |
| Apinae | Bombini | <i>Bombus (Megabombus)</i>      | <i>Bombus (Megabombus) ruderatus</i>           | (Fabricius, 1775)      | 9   |
| Apinae | Bombini | <i>Bombus (Megabombus)</i>      | <i>Bombus (Megabombus) securus</i>             | (Frison, 1935)         | 2   |

|        |         |                                 |                                                 |                          |     |
|--------|---------|---------------------------------|-------------------------------------------------|--------------------------|-----|
| Apinae | Bombini | <i>Bombus (Megabombus)</i>      | <i>Bombus (Megabombus) supremus</i>             | Morawitz, 1887           | 3   |
| Apinae | Bombini | <i>Bombus (Megabombus)</i>      | <i>Bombus (Megabombus) tichenkoi</i>            | (Skorikov, 1923)         | 7   |
| Apinae | Bombini | <i>Bombus (Megabombus)</i>      | <i>Bombus (Megabombus) trifasciatus</i>         | Smith, 1852              | 42  |
| Apinae | Bombini | <i>Bombus (Megabombus)</i>      | <i>Bombus (Megabombus) ussurensis</i>           | Radoszkowski, 1877       | 48  |
| Apinae | Bombini | <i>Bombus (Melanobombus)</i>    | <i>Bombus (Melanobombus) caucasicus</i>         | Radoszkowski, 1860       | 5   |
| Apinae | Bombini | <i>Bombus (Melanobombus)</i>    | <i>Bombus (Melanobombus) eximius</i>            | Smith, 1852              | 3   |
| Apinae | Bombini | <i>Bombus (Melanobombus)</i>    | <i>Bombus (Melanobombus) friseanus</i>          | Skorikov, 1933           | 4   |
| Apinae | Bombini | <i>Bombus (Melanobombus)</i>    | <i>Bombus (Melanobombus) incertus</i>           | Morawitz, 1881           | 1   |
| Apinae | Bombini | <i>Bombus (Melanobombus)</i>    | <i>Bombus (Melanobombus) keriensis</i>          | Morawitz, 1887           | 2   |
| Apinae | Bombini | <i>Bombus (Melanobombus)</i>    | <i>Bombus (Melanobombus) ladakhensis</i>        | Richards, 1928           | 1   |
| Apinae | Bombini | <i>Bombus (Melanobombus)</i>    | <i>Bombus (Melanobombus) lapidarius</i>         | (Linnaeus, 1758)         | 387 |
| Apinae | Bombini | <i>Bombus (Melanobombus)</i>    | <i>Bombus (Melanobombus) pyrosoma</i>           | Morawitz, 1890           | 7   |
| Apinae | Bombini | <i>Bombus (Melanobombus)</i>    | <i>Bombus (Melanobombus) rufofasciatus</i>      | Smith, 1852              | 1   |
| Apinae | Bombini | <i>Bombus (Melanobombus)</i>    | <i>Bombus (Melanobombus) sichelii</i>           | Radoszkowski, 1860       | 33  |
| Apinae | Bombini | <i>Bombus (Mendacibombus)</i>   | <i>Bombus (Mendacibombus) defector</i>          | Skorikov, 1910           | 1   |
| Apinae | Bombini | <i>Bombus (Mendacibombus)</i>   | <i>Bombus (Mendacibombus) mendax</i>            | Gerstäcker, 1869         | 7   |
| Apinae | Bombini | <i>Bombus (Mendacibombus)</i>   | <i>Bombus (Mendacibombus) waltoni</i>           | Cockerell, 1910          | 1   |
| Apinae | Bombini | <i>Bombus (Orientalibombus)</i> | <i>Bombus (Orientalibombus) funerarius</i>      | Smith, 1852              | 1   |
| Apinae | Bombini | <i>Bombus (Orientalibombus)</i> | <i>Bombus (Orientalibombus) haemorrhoidalis</i> | Smith, 1852              | 30  |
| Apinae | Bombini | <i>Bombus (Psithyrus)</i>       | <i>Bombus (Psithyrus) barbutellus</i>           | (Kirby, 1802)            | 11  |
| Apinae | Bombini | <i>Bombus (Psithyrus)</i>       | <i>Bombus (Psithyrus) bellardii</i>             | (Gribodo, 1892)          | 2   |
| Apinae | Bombini | <i>Bombus (Psithyrus)</i>       | <i>Bombus (Psithyrus) bohemicus</i>             | Seidl, 1837              | 32  |
| Apinae | Bombini | <i>Bombus (Psithyrus)</i>       | <i>Bombus (Psithyrus) campestris</i>            | (Panzer, 1801)           | 10  |
| Apinae | Bombini | <i>Bombus (Psithyrus)</i>       | <i>Bombus (Psithyrus) citrinus</i>              | (Smith, 1854)            | 23  |
| Apinae | Bombini | <i>Bombus (Psithyrus)</i>       | <i>Bombus (Psithyrus) flavidus</i>              | Eversmann, 1852          | 31  |
| Apinae | Bombini | <i>Bombus (Psithyrus)</i>       | <i>Bombus (Psithyrus) insularis</i>             | (Smith, 1861)            | 38  |
| Apinae | Bombini | <i>Bombus (Psithyrus)</i>       | <i>Bombus (Psithyrus) norvegicus</i>            | (Sparre-Schneider, 1918) | 7   |
| Apinae | Bombini | <i>Bombus (Psithyrus)</i>       | <i>Bombus (Psithyrus) quadricolor</i>           | (Lepelletier, 1832)      | 4   |
| Apinae | Bombini | <i>Bombus (Psithyrus)</i>       | <i>Bombus (Psithyrus) rupestris</i>             | (Fabricius, 1793)        | 20  |
| Apinae | Bombini | <i>Bombus (Psithyrus)</i>       | <i>Bombus (Psithyrus) sylvestris</i>            | (Lepelletier, 1832)      | 38  |

|        |         |                            |                                         |                    |     |
|--------|---------|----------------------------|-----------------------------------------|--------------------|-----|
| Apinae | Bombini | <i>Bombus (Psithyrus)</i>  | <i>Bombus (Psithyrus) turneri</i>       | Richards, 1929     | 1   |
| Apinae | Bombini | <i>Bombus (Psithyrus)</i>  | <i>Bombus (Psithyrus) variabilis</i>    | (Cresson, 1872)    | 4   |
| Apinae | Bombini | <i>Bombus (Psithyrus)</i>  | <i>Bombus (Psithyrus) vestalis</i>      | (Geoffroy, 1785)   | 38  |
| Apinae | Bombini | <i>Bombus (Pyrobombus)</i> | <i>Bombus (Pyrobombus) ardens</i>       | Smith, 1879        | 341 |
| Apinae | Bombini | <i>Bombus (Pyrobombus)</i> | <i>Bombus (Pyrobombus) avanus</i>       | (Skorikov, 1938)   | 6   |
| Apinae | Bombini | <i>Bombus (Pyrobombus)</i> | <i>Bombus (Pyrobombus) beaticola</i>    | (Tkalcu, 1968)     | 6   |
| Apinae | Bombini | <i>Bombus (Pyrobombus)</i> | <i>Bombus (Pyrobombus) bifarius</i>     | Cresson, 1878      | 162 |
| Apinae | Bombini | <i>Bombus (Pyrobombus)</i> | <i>Bombus (Pyrobombus) bimaculatus</i>  | Cresson, 1863      | 34  |
| Apinae | Bombini | <i>Bombus (Pyrobombus)</i> | <i>Bombus (Pyrobombus) brodmannicus</i> | Vogt, 1909         | 5   |
| Apinae | Bombini | <i>Bombus (Pyrobombus)</i> | <i>Bombus (Pyrobombus) centralis</i>    | Cresson, 1864      | 11  |
| Apinae | Bombini | <i>Bombus (Pyrobombus)</i> | <i>Bombus (Pyrobombus) cingulatus</i>   | Wahlberg, 1854     | 5   |
| Apinae | Bombini | <i>Bombus (Pyrobombus)</i> | <i>Bombus (Pyrobombus) ephippiatus</i>  | Say, 1837          | 21  |
| Apinae | Bombini | <i>Bombus (Pyrobombus)</i> | <i>Bombus (Pyrobombus) flavescens</i>   | Smith, 1852        | 3   |
| Apinae | Bombini | <i>Bombus (Pyrobombus)</i> | <i>Bombus (Pyrobombus) flavifrons</i>   | Cresson, 1863      | 57  |
| Apinae | Bombini | <i>Bombus (Pyrobombus)</i> | <i>Bombus (Pyrobombus) frigidus</i>     | Smith, 1854        | 82  |
| Apinae | Bombini | <i>Bombus (Pyrobombus)</i> | <i>Bombus (Pyrobombus) glacialis</i>    | Friese, 1902       | 6   |
| Apinae | Bombini | <i>Bombus (Pyrobombus)</i> | <i>Bombus (Pyrobombus) haematurus</i>   | Kriechbaumer, 1870 | 1   |
| Apinae | Bombini | <i>Bombus (Pyrobombus)</i> | <i>Bombus (Pyrobombus) huntii</i>       | Greene, 1860       | 43  |
| Apinae | Bombini | <i>Bombus (Pyrobombus)</i> | <i>Bombus (Pyrobombus) hypnorum</i>     | (Linnaeus, 1758)   | 23  |
| Apinae | Bombini | <i>Bombus (Pyrobombus)</i> | <i>Bombus (Pyrobombus) impatiens</i>    | Cresson, 1863      | 78  |
| Apinae | Bombini | <i>Bombus (Pyrobombus)</i> | <i>Bombus (Pyrobombus) jonellus</i>     | (Kirby, 1802)      | 27  |
| Apinae | Bombini | <i>Bombus (Pyrobombus)</i> | <i>Bombus (Pyrobombus) lapponicus</i>   | (Fabricius, 1793)  | 109 |
| Apinae | Bombini | <i>Bombus (Pyrobombus)</i> | <i>Bombus (Pyrobombus) lepidus</i>      | Skorikov, 1912     | 1   |
| Apinae | Bombini | <i>Bombus (Pyrobombus)</i> | <i>Bombus (Pyrobombus) melanopygus</i>  | Nylander, 1848     | 44  |
| Apinae | Bombini | <i>Bombus (Pyrobombus)</i> | <i>Bombus (Pyrobombus) mixtus</i>       | Cresson, 1878      | 27  |
| Apinae | Bombini | <i>Bombus (Pyrobombus)</i> | <i>Bombus (Pyrobombus) modestus</i>     | Eversmann, 1852    | 8   |
| Apinae | Bombini | <i>Bombus (Pyrobombus)</i> | <i>Bombus (Pyrobombus) monticola</i>    | Smith, 1849        | 32  |
| Apinae | Bombini | <i>Bombus (Pyrobombus)</i> | <i>Bombus (Pyrobombus) perplexus</i>    | Cresson, 1863      | 55  |
| Apinae | Bombini | <i>Bombus (Pyrobombus)</i> | <i>Bombus (Pyrobombus) picipes</i>      | Richards, 1934     | 12  |
| Apinae | Bombini | <i>Bombus (Pyrobombus)</i> | <i>Bombus (Pyrobombus) pratorum</i>     | (Linnaeus, 1761)   | 74  |

|        |         |                                   |                                                 |                                 |     |
|--------|---------|-----------------------------------|-------------------------------------------------|---------------------------------|-----|
| Apinae | Bombini | <i>Bombus (Pyrobombus)</i>        | <i>Bombus (Pyrobombus) pyrenaeus</i>            | Pérez, 1880                     | 6   |
| Apinae | Bombini | <i>Bombus (Pyrobombus)</i>        | <i>Bombus (Pyrobombus) sandersoni</i>           | Franklin, 1913                  | 11  |
| Apinae | Bombini | <i>Bombus (Pyrobombus)</i>        | <i>Bombus (Pyrobombus) sitkensis</i>            | Nylander, 1848                  | 8   |
| Apinae | Bombini | <i>Bombus (Pyrobombus)</i>        | <i>Bombus (Pyrobombus) sonani</i>               | (Frison, 1934)                  | 1   |
| Apinae | Bombini | <i>Bombus (Pyrobombus)</i>        | <i>Bombus (Pyrobombus) ternarius</i>            | Say, 1837                       | 44  |
| Apinae | Bombini | <i>Bombus (Pyrobombus)</i>        | <i>Bombus (Pyrobombus) vagans</i>               | Smith, 1854                     | 167 |
| Apinae | Bombini | <i>Bombus (Pyrobombus)</i>        | <i>Bombus (Pyrobombus) vancouverensis</i>       | Cresson, 1878                   | 91  |
| Apinae | Bombini | <i>Bombus (Pyrobombus)</i>        | <i>Bombus (Pyrobombus) vandykei</i>             | Frison, 1927                    | 3   |
| Apinae | Bombini | <i>Bombus (Pyrobombus)</i>        | <i>Bombus (Pyrobombus) vosnesenskii</i>         | Radoszkowski, 1862              | 8   |
| Apinae | Bombini | <i>Bombus (Pyrobombus)</i>        | <i>Bombus (Pyrobombus) wangae</i>               | Williams et al., 2009           | 4   |
| Apinae | Bombini | <i>Bombus (Sibiricobombus)</i>    | <i>Bombus (Sibiricobombus) asiaticus</i>        | Morawitz, 1875                  | 1   |
| Apinae | Bombini | <i>Bombus (Sibiricobombus)</i>    | <i>Bombus (Sibiricobombus) sibiricus</i>        | (Fabricius, 1781)               | 2   |
| Apinae | Bombini | <i>Bombus (Subterraneobombus)</i> | <i>Bombus (Subterraneobombus) amurensis</i>     | Radoszkowski, 1862              | 10  |
| Apinae | Bombini | <i>Bombus (Subterraneobombus)</i> | <i>Bombus (Subterraneobombus) appositus</i>     | Cresson, 1878                   | 62  |
| Apinae | Bombini | <i>Bombus (Subterraneobombus)</i> | <i>Bombus (Subterraneobombus) borealis</i>      | Kirby, 1837                     | 21  |
| Apinae | Bombini | <i>Bombus (Subterraneobombus)</i> | <i>Bombus (Subterraneobombus) difficillimus</i> | Skorikov, 1912                  | 9   |
| Apinae | Bombini | <i>Bombus (Subterraneobombus)</i> | <i>Bombus (Subterraneobombus) distinguendus</i> | Morawitz, 1869                  | 29  |
| Apinae | Bombini | <i>Bombus (Subterraneobombus)</i> | <i>Bombus (Subterraneobombus) fedtschenkoi</i>  | Morawitz, 1875                  | 1   |
| Apinae | Bombini | <i>Bombus (Subterraneobombus)</i> | <i>Bombus (Subterraneobombus) fragrans</i>      | (Pallas, 1771)                  | 8   |
| Apinae | Bombini | <i>Bombus (Subterraneobombus)</i> | <i>Bombus (Subterraneobombus) melanurus</i>     | Lepeletier, 1835                | 65  |
| Apinae | Bombini | <i>Bombus (Subterraneobombus)</i> | <i>Bombus (Subterraneobombus) mongolensis</i>   | Williams, 2011                  | 14  |
| Apinae | Bombini | <i>Bombus (Subterraneobombus)</i> | <i>Bombus (Subterraneobombus) personatus</i>    | Smith, 1879                     | 14  |
| Apinae | Bombini | <i>Bombus (Subterraneobombus)</i> | <i>Bombus (Subterraneobombus) subterraneus</i>  | (Linnaeus, 1758)                | 51  |
| Apinae | Bombini | <i>Bombus (Thoracobombus)</i>     | <i>Bombus (Thoracobombus) anachoreta</i>        | (Skorikov, 1914)                | 1   |
| Apinae | Bombini | <i>Bombus (Thoracobombus)</i>     | <i>Bombus (Thoracobombus) bahiensis</i>         | Santos, Júnior & Silveira, 2015 | 3   |
| Apinae | Bombini | <i>Bombus (Thoracobombus)</i>     | <i>Bombus (Thoracobombus) bellicosus</i>        | Smith, 1879                     | 1   |
| Apinae | Bombini | <i>Bombus (Thoracobombus)</i>     | <i>Bombus (Thoracobombus) brasiliensis</i>      | Lepeletier, 1835                | 157 |
| Apinae | Bombini | <i>Bombus (Thoracobombus)</i>     | <i>Bombus (Thoracobombus) brevivillus</i>       | Franklin, 1913                  | 19  |
| Apinae | Bombini | <i>Bombus (Thoracobombus)</i>     | <i>Bombus (Thoracobombus) deuteronymus</i>      | Schulz, 1906                    | 7   |
| Apinae | Bombini | <i>Bombus (Thoracobombus)</i>     | <i>Bombus (Thoracobombus) digressus</i>         | (Milliron, 1962)                | 1   |



|        |         |                               |                                                 |                    |     |
|--------|---------|-------------------------------|-------------------------------------------------|--------------------|-----|
| Apinae | Bombini | <i>Bombus (Thoracobombus)</i> | <i>Bombus (Thoracobombus) diligens</i>          | Smith, 1861        | 1   |
| Apinae | Bombini | <i>Bombus (Thoracobombus)</i> | <i>Bombus (Thoracobombus) excellens</i>         | Smith, 1879        | 1   |
| Apinae | Bombini | <i>Bombus (Thoracobombus)</i> | <i>Bombus (Thoracobombus) fervidus</i>          | (Fabricius, 1798)  | 86  |
| Apinae | Bombini | <i>Bombus (Thoracobombus)</i> | <i>Bombus (Thoracobombus) filchnerae</i>        | Vogt, 1908         | 1   |
| Apinae | Bombini | <i>Bombus (Thoracobombus)</i> | <i>Bombus (Thoracobombus) honshuensis</i>       | (Tkalcu, 1968)     | 4   |
| Apinae | Bombini | <i>Bombus (Thoracobombus)</i> | <i>Bombus (Thoracobombus) humilis</i>           | Illiger, 1806      | 17  |
| Apinae | Bombini | <i>Bombus (Thoracobombus)</i> | <i>Bombus (Thoracobombus) impetuosus</i>        | Smith, 1871        | 1   |
| Apinae | Bombini | <i>Bombus (Thoracobombus)</i> | <i>Bombus (Thoracobombus) laesus</i>            | Morawitz, 1875     | 23  |
| Apinae | Bombini | <i>Bombus (Thoracobombus)</i> | <i>Bombus (Thoracobombus) medius</i>            | Cresson, 1863      | 6   |
| Apinae | Bombini | <i>Bombus (Thoracobombus)</i> | <i>Bombus (Thoracobombus) mesomelas</i>         | Gerstäcker, 1869   | 12  |
| Apinae | Bombini | <i>Bombus (Thoracobombus)</i> | <i>Bombus (Thoracobombus) mexicanus</i>         | Cresson, 1878      | 5   |
| Apinae | Bombini | <i>Bombus (Thoracobombus)</i> | <i>Bombus (Thoracobombus) morio</i>             | (Swederus, 1787)   | 194 |
| Apinae | Bombini | <i>Bombus (Thoracobombus)</i> | <i>Bombus (Thoracobombus) mucidus</i>           | Gerstäcker, 1869   | 10  |
| Apinae | Bombini | <i>Bombus (Thoracobombus)</i> | <i>Bombus (Thoracobombus) muscorum</i>          | (Linnaeus, 1758)   | 4   |
| Apinae | Bombini | <i>Bombus (Thoracobombus)</i> | <i>Bombus (Thoracobombus) opifex</i>            | Smith, 1879        | 1   |
| Apinae | Bombini | <i>Bombus (Thoracobombus)</i> | <i>Bombus (Thoracobombus) opulentus</i>         | Smith, 1861        | 3   |
| Apinae | Bombini | <i>Bombus (Thoracobombus)</i> | <i>Bombus (Thoracobombus) pascuorum</i>         | (Scopoli, 1763)    | 187 |
| Apinae | Bombini | <i>Bombus (Thoracobombus)</i> | <i>Bombus (Thoracobombus) pauloensis</i>        | Friese, 1913       | 38  |
| Apinae | Bombini | <i>Bombus (Thoracobombus)</i> | <i>Bombus (Thoracobombus) pensylvanicus</i>     | (De Geer, 1773)    | 9   |
| Apinae | Bombini | <i>Bombus (Thoracobombus)</i> | <i>Bombus (Thoracobombus) persicus</i>          | Radoszkowski, 1881 | 3   |
| Apinae | Bombini | <i>Bombus (Thoracobombus)</i> | <i>Bombus (Thoracobombus) pseudobaicalensis</i> | Vogt, 1911         | 4   |
| Apinae | Bombini | <i>Bombus (Thoracobombus)</i> | <i>Bombus (Thoracobombus) pullatus</i>          | Franklin, 1913     | 11  |
| Apinae | Bombini | <i>Bombus (Thoracobombus)</i> | <i>Bombus (Thoracobombus) remotus</i>           | (Tkalcu, 1968)     | 1   |
| Apinae | Bombini | <i>Bombus (Thoracobombus)</i> | <i>Bombus (Thoracobombus) ruderarius</i>        | (Müller, 1765)     | 10  |
| Apinae | Bombini | <i>Bombus (Thoracobombus)</i> | <i>Bombus (Thoracobombus) schrencki</i>         | Morawitz, 1881     | 13  |
| Apinae | Bombini | <i>Bombus (Thoracobombus)</i> | <i>Bombus (Thoracobombus) sylvarum</i>          | (Linnaeus, 1761)   | 28  |
| Apinae | Bombini | <i>Bombus (Thoracobombus)</i> | <i>Bombus (Thoracobombus) transversalis</i>     | (Olivier, 1789)    | 7   |
| Apinae | Bombini | <i>Bombus (Thoracobombus)</i> | <i>Bombus (Thoracobombus) tricornis</i>         | Radoszkowski, 1888 | 3   |
| Apinae | Bombini | <i>Bombus (Thoracobombus)</i> | <i>Bombus (Thoracobombus) trinominatus</i>      | Dalla Torre, 1890  | 5   |
| Apinae | Bombini | <i>Bombus (Thoracobombus)</i> | <i>Bombus (Thoracobombus) veteranus</i>         | (Fabricius, 1793)  | 1   |

|             |                 |                               |                                     |                      |    |
|-------------|-----------------|-------------------------------|-------------------------------------|----------------------|----|
| Apinae      | Bombini         | <i>Bombus (Thoracobombus)</i> | <i>Bombus (Thoracobombus) weisi</i> | Friese, 1903         | 5  |
| Xylocopinae | Allodapini      | <i>Braunsapis</i>             | <i>Braunsapis elizabethana</i>      | (Strand, 1915)       | 1  |
| Xylocopinae | Allodapini      | <i>Braunsapis</i>             | <i>Braunsapis hewitti</i>           | (Cameron, 1908)      | 2  |
| Xylocopinae | Allodapini      | <i>Braunsapis</i>             | <i>Braunsapis hirsuta</i>           | Reyes, 1993          | 1  |
| Xylocopinae | Allodapini      | <i>Braunsapis</i>             | <i>Braunsapis mixta</i>             | (Smith, 1852)        | 8  |
| Xylocopinae | Allodapini      | <i>Braunsapis</i>             | <i>Braunsapis picitarsis</i>        | (Cameron, 1902)      | 1  |
| Xylocopinae | Allodapini      | <i>Braunsapis</i>             | <i>Braunsapis puangensis</i>        | (Cockerell, 1929)    | 73 |
| Xylocopinae | Allodapini      | <i>Braunsapis</i>             | <i>Braunsapis trochanterata</i>     | (Gerstäcker, 1870)   | 1  |
| Xylocopinae | Allodapini      | <i>Braunsapis</i>             | <i>Braunsapis unicolor</i>          | (Smith, 1854)        | 1  |
| Xylocopinae | Allodapini      | <i>Braunsapis</i>             | <i>Braunsapis vitrea</i>            | (Vachal, 1903)       | 1  |
| Eucerinae   | Tapinotaspidini | <i>Caenonomada</i>            | <i>Caenonomada bruneri</i>          | Ashmead, 1900        | 2  |
| Eucerinae   | Tapinotaspidini | <i>Caenonomada</i>            | <i>Caenonomada labrata</i>          | Zanella, 2002        | 2  |
| Eucerinae   | Tapinotaspidini | <i>Caenonomada</i>            | <i>Caenonomada unicalcarata</i>     | (Ducke, 1908)        | 3  |
| Apinae      | Centridini      | <i>Centris</i>                | <i>Centris atripes</i>              | Mocsáry, 1899        | 9  |
| Apinae      | Centridini      | <i>Centris</i>                | <i>Centris caesalpiniae</i>         | Cockerell, 1897      | 5  |
| Apinae      | Centridini      | <i>Centris</i>                | <i>Centris decolorata</i>           | Lepeletier, 1841     | 2  |
| Apinae      | Centridini      | <i>Centris</i>                | <i>Centris fasciata</i>             | Smith, 1854          | 1  |
| Apinae      | Centridini      | <i>Centris</i>                | <i>Centris haemorrhoidalis</i>      | (Fabricius, 1775)    | 1  |
| Apinae      | Centridini      | <i>Centris</i>                | <i>Centris hoffmanseggiae</i>       | Cockerell, 1897      | 1  |
| Apinae      | Centridini      | <i>Centris</i>                | <i>Centris lanipes</i>              | (Fabricius, 1775)    | 1  |
| Apinae      | Centridini      | <i>Centris</i>                | <i>Centris lutea</i>                | Friese, 1900         | 1  |
| Apinae      | Centridini      | <i>Centris</i>                | <i>Centris nitida</i>               | Smith, 1874          | 3  |
| Apinae      | Centridini      | <i>Centris</i>                | <i>Centris rhodopus</i>             | Cockerell, 1897      | 4  |
| Apinae      | Centridini      | <i>Centris</i>                | <i>Centris similis</i>              | (Fabricius, 1804)    | 3  |
| Apinae      | Centridini      | <i>Centris</i>                | <i>Centris tamarugalis</i>          | Toro & Chiappa, 1989 | 2  |
| Apinae      | Centridini      | <i>Centris</i>                | <i>Centris tarsata</i>              | Smith, 1874          | 3  |
| Apinae      | Centridini      | <i>Centris</i>                | <i>Centris vittata</i>              | Lepeletier, 1841     | 2  |
| Apinae      | Centridini      | <i>Centris</i>                | <i>Centris zacateca</i>             | Snelling, 1966       | 1  |
| Apinae      | Meliponini      | <i>Cephalotrigona</i>         | <i>Cephalotrigona capitata</i>      | (Smith, 1854)        | 1  |
| Apinae      | Meliponini      | <i>Cephalotrigona</i>         | <i>Cephalotrigona zexmeniae</i>     | (Cockerell, 1912)    | 2  |

|             |            |                 |                               |                             |     |
|-------------|------------|-----------------|-------------------------------|-----------------------------|-----|
| Xylocopinae | Ceratinini | <i>Ceratina</i> | <i>Ceratina acantha</i>       | Provancher, 1895            | 21  |
| Xylocopinae | Ceratinini | <i>Ceratina</i> | <i>Ceratina acuta</i>         | Friese, 1896                | 1   |
| Xylocopinae | Ceratinini | <i>Ceratina</i> | <i>Ceratina apacheorum</i>    | Daly, 1973                  | 3   |
| Xylocopinae | Ceratinini | <i>Ceratina</i> | <i>Ceratina arizonensis</i>   | Cockerell, 1898             | 2   |
| Xylocopinae | Ceratinini | <i>Ceratina</i> | <i>Ceratina australensis</i>  | (Perkins, 1912)             | 4   |
| Xylocopinae | Ceratinini | <i>Ceratina</i> | <i>Ceratina binghami</i>      | Cockerell, 1908             | 1   |
| Xylocopinae | Ceratinini | <i>Ceratina</i> | <i>Ceratina boninensis</i>    | Yasumatsu, 1955             | 2   |
| Xylocopinae | Ceratinini | <i>Ceratina</i> | <i>Ceratina bowringi</i>      | Baker, 2002                 | 13  |
| Xylocopinae | Ceratinini | <i>Ceratina</i> | <i>Ceratina calcarata</i>     | Robertson, 1900             | 116 |
| Xylocopinae | Ceratinini | <i>Ceratina</i> | <i>Ceratina chalybea</i>      | Chevrier, 1872              | 22  |
| Xylocopinae | Ceratinini | <i>Ceratina</i> | <i>Ceratina chrysomalla</i>   | Gerstäcker, 1869            | 1   |
| Xylocopinae | Ceratinini | <i>Ceratina</i> | <i>Ceratina cockerelli</i>    | H. S. Smith, 1907           | 3   |
| Xylocopinae | Ceratinini | <i>Ceratina</i> | <i>Ceratina cognata</i>       | Smith, 1879                 | 4   |
| Xylocopinae | Ceratinini | <i>Ceratina</i> | <i>Ceratina compacta</i>      | Smith, 1879                 | 3   |
| Xylocopinae | Ceratinini | <i>Ceratina</i> | <i>Ceratina coptica</i>       | Baker, 2002                 | 44  |
| Xylocopinae | Ceratinini | <i>Ceratina</i> | <i>Ceratina cucurbitina</i>   | (Rossi, 1792)               | 20  |
| Xylocopinae | Ceratinini | <i>Ceratina</i> | <i>Ceratina cyanea</i>        | (Kirby, 1802)               | 25  |
| Xylocopinae | Ceratinini | <i>Ceratina</i> | <i>Ceratina cyaniventris</i>  | Cresson, 1865               | 1   |
| Xylocopinae | Ceratinini | <i>Ceratina</i> | <i>Ceratina dentipes</i>      | Friese, 1914                | 82  |
| Xylocopinae | Ceratinini | <i>Ceratina</i> | <i>Ceratina dupla</i>         | Say, 1837                   | 113 |
| Xylocopinae | Ceratinini | <i>Ceratina</i> | <i>Ceratina flavipes</i>      | Smith, 1879                 | 2   |
| Xylocopinae | Ceratinini | <i>Ceratina</i> | <i>Ceratina floridana</i>     | Mitchell, 1962              | 35  |
| Xylocopinae | Ceratinini | <i>Ceratina</i> | <i>Ceratina hieroglyphica</i> | Smith, 1854                 | 6   |
| Xylocopinae | Ceratinini | <i>Ceratina</i> | <i>Ceratina japonica</i>      | Cockerell, 1911             | 1   |
| Xylocopinae | Ceratinini | <i>Ceratina</i> | <i>Ceratina lieftincki</i>    | van der Vecht, 1952         | 1   |
| Xylocopinae | Ceratinini | <i>Ceratina</i> | <i>Ceratina megastigmata</i>  | Yasumatsu & Hirashima, 1969 | 2   |
| Xylocopinae | Ceratinini | <i>Ceratina</i> | <i>Ceratina mikmaqi</i>       | Rehan & Sheffield, 2011     | 127 |
| Xylocopinae | Ceratinini | <i>Ceratina</i> | <i>Ceratina minutula</i>      | ???????????????             | 1   |
| Xylocopinae | Ceratinini | <i>Ceratina</i> | <i>Ceratina nanula</i>        | Cockerell, 1897             | 5   |
| Xylocopinae | Ceratinini | <i>Ceratina</i> | <i>Ceratina neomexicana</i>   | Cockerell, 1901             | 8   |

|             |                 |                     |                                  |                          |     |
|-------------|-----------------|---------------------|----------------------------------|--------------------------|-----|
| Xylocopinae | Ceratinini      | <i>Ceratina</i>     | <i>Ceratina nigrolabiata</i>     | Friese, 1896             | 3   |
| Xylocopinae | Ceratinini      | <i>Ceratina</i>     | <i>Ceratina okinawana</i>        | Matsumura & Uchida, 1926 | 3   |
| Xylocopinae | Ceratinini      | <i>Ceratina</i>     | <i>Ceratina pacifica</i>         | H. S. Smith, 1907        | 4   |
| Xylocopinae | Ceratinini      | <i>Ceratina</i>     | <i>Ceratina polita</i>           | Friese, 1902             | 1   |
| Xylocopinae | Ceratinini      | <i>Ceratina</i>     | <i>Ceratina punctigena</i>       | Cockerell, 1916          | 1   |
| Xylocopinae | Ceratinini      | <i>Ceratina</i>     | <i>Ceratina sequoiae</i>         | Michener, 1936           | 4   |
| Xylocopinae | Ceratinini      | <i>Ceratina</i>     | <i>Ceratina silvicola</i>        | Shiokawa, 2008           | 1   |
| Xylocopinae | Ceratinini      | <i>Ceratina</i>     | <i>Ceratina smaragdula</i>       | (Fabricius, 1787)        | 175 |
| Xylocopinae | Ceratinini      | <i>Ceratina</i>     | <i>Ceratina spinipes</i>         | Shiokawa, 2009           | 2   |
| Xylocopinae | Ceratinini      | <i>Ceratina</i>     | <i>Ceratina strenua</i>          | Smith, 1879              | 40  |
| Xylocopinae | Ceratinini      | <i>Ceratina</i>     | <i>Ceratina sutepensis</i>       | Cockerell, 1929          | 3   |
| Xylocopinae | Ceratinini      | <i>Ceratina</i>     | <i>Ceratina tejonensis</i>       | Cresson, 1864            | 1   |
| Xylocopinae | Ceratinini      | <i>Ceratina</i>     | <i>Ceratina unimaculata</i>      | Smith, 1879              | 4   |
| Eucerinae   | Tapinotaspidini | <i>Chalepogenus</i> | <i>Chalepogenus caeruleus</i>    | (Friese, 1906)           | 1   |
| Eucerinae   | Tapinotaspidini | <i>Chalepogenus</i> | <i>Chalepogenus cocucci</i>      | Roig-Alsina, 1999        | 1   |
| Eucerinae   | Tapinotaspidini | <i>Chalepogenus</i> | <i>Chalepogenus goeldianus</i>   | (Friese, 1899)           | 2   |
| Eucerinae   | Tapinotaspidini | <i>Chalepogenus</i> | <i>Chalepogenus herbsti</i>      | (Friese, 1906)           | 1   |
| Eucerinae   | Tapinotaspidini | <i>Chalepogenus</i> | <i>Chalepogenus muelleri</i>     | (Friese, 1899)           | 1   |
| Eucerinae   | Tapinotaspidini | <i>Chalepogenus</i> | <i>Chalepogenus parvus</i>       | Roig-Alsina, 1997        | 2   |
| Eucerinae   | Tapinotaspidini | <i>Chalepogenus</i> | <i>Chalepogenus subcaeruleus</i> | Roig-Alsina, 1999        | 1   |
| Xylocopinae | Ctenoplectrini  | <i>Ctenoplectra</i> | <i>Ctenoplectra albolimbata</i>  | Magretti, 1895           | 1   |
| Xylocopinae | Ctenoplectrini  | <i>Ctenoplectra</i> | <i>Ctenoplectra chalybea</i>     | Smith, 1857              | 2   |
| Xylocopinae | Ctenoplectrini  | <i>Ctenoplectra</i> | <i>Ctenoplectra cornuta</i>      | Gribodo, 1892            | 1   |
| Xylocopinae | Ctenoplectrini  | <i>Ctenoplectra</i> | <i>Ctenoplectra davidi</i>       | Vachal, 1903             | 6   |
| Xylocopinae | Ctenoplectrini  | <i>Ctenoplectra</i> | <i>Ctenoplectra florisomnis</i>  | van der Vecht, 1941      | 1   |
| Eucerinae   | Emphorini       | <i>Diadasia</i>     | <i>Diadasia australis</i>        | (Cresson, 1879)          | 15  |
| Eucerinae   | Emphorini       | <i>Diadasia</i>     | <i>Diadasia bituberculata</i>    | (Cresson, 1879)          | 3   |
| Eucerinae   | Emphorini       | <i>Diadasia</i>     | <i>Diadasia consociata</i>       | Timberlake, 1939         | 4   |
| Eucerinae   | Emphorini       | <i>Diadasia</i>     | <i>Diadasia diminuta</i>         | (Cresson, 1879)          | 2   |
| Eucerinae   | Emphorini       | <i>Diadasia</i>     | <i>Diadasia enavata</i>          | (Cresson, 1872)          | 1   |

|           |           |                   |                               |                   |    |
|-----------|-----------|-------------------|-------------------------------|-------------------|----|
| Eucerinae | Emphorini | <i>Diadasia</i>   | <i>Diadasia lutzi</i>         | Cockerell, 1924   | 2  |
| Eucerinae | Emphorini | <i>Diadasia</i>   | <i>Diadasia nigrifrons</i>    | (Cresson, 1879)   | 1  |
| Eucerinae | Emphorini | <i>Diadasia</i>   | <i>Diadasia nitidifrons</i>   | Cockerell, 1905   | 1  |
| Eucerinae | Emphorini | <i>Diadasia</i>   | <i>Diadasia ochracea</i>      | (Cockerell, 1903) | 7  |
| Eucerinae | Emphorini | <i>Diadasia</i>   | <i>Diadasia olivacea</i>      | (Cresson, 1879)   | 3  |
| Eucerinae | Emphorini | <i>Diadasia</i>   | <i>Diadasia opuntiae</i>      | Cockerell, 1901   | 3  |
| Eucerinae | Emphorini | <i>Diadasia</i>   | <i>Diadasia rinconis</i>      | Cockerell, 1897   | 6  |
| Nomadinae | Osirini   | <i>Epeoloides</i> | <i>Epeoloides coecutiens</i>  | (Fabricius, 1775) | 5  |
| Nomadinae | Osirini   | <i>Epeoloides</i> | <i>Epeoloides pilosulus</i>   | (Cresson, 1879)   | 2  |
| Nomadinae | Epeolini  | <i>Epeolus</i>    | <i>Epeolus ainsliei</i>       | Crawford, 1932    | 3  |
| Nomadinae | Epeolini  | <i>Epeolus</i>    | <i>Epeolus alpinus</i>        | Friese, 1893      | 3  |
| Nomadinae | Epeolini  | <i>Epeolus</i>    | <i>Epeolus americanus</i>     | (Cresson, 1878)   | 18 |
| Nomadinae | Epeolini  | <i>Epeolus</i>    | <i>Epeolus andriyi</i>        | Onuferko, 2018    | 1  |
| Nomadinae | Epeolini  | <i>Epeolus</i>    | <i>Epeolus asperatus</i>      | Cockerell, 1909   | 3  |
| Nomadinae | Epeolini  | <i>Epeolus</i>    | <i>Epeolus attenboroughi</i>  | Onuferko, 2018    | 1  |
| Nomadinae | Epeolini  | <i>Epeolus</i>    | <i>Epeolus australis</i>      | Mitchell, 1962    | 2  |
| Nomadinae | Epeolini  | <i>Epeolus</i>    | <i>Epeolus autumnalis</i>     | Robertson, 1902   | 10 |
| Nomadinae | Epeolini  | <i>Epeolus</i>    | <i>Epeolus axillaris</i>      | Onuferko, 2018    | 3  |
| Nomadinae | Epeolini  | <i>Epeolus</i>    | <i>Epeolus barberiellus</i>   | Cockerell, 1907   | 2  |
| Nomadinae | Epeolini  | <i>Epeolus</i>    | <i>Epeolus basili</i>         | Onuferko, 2018    | 3  |
| Nomadinae | Epeolini  | <i>Epeolus</i>    | <i>Epeolus bifasciatus</i>    | Cresson, 1864     | 3  |
| Nomadinae | Epeolini  | <i>Epeolus</i>    | <i>Epeolus brumleyi</i>       | Onuferko, 2018    | 4  |
| Nomadinae | Epeolini  | <i>Epeolus</i>    | <i>Epeolus canadensis</i>     | Mitchell, 1962    | 8  |
| Nomadinae | Epeolini  | <i>Epeolus</i>    | <i>Epeolus carolinus</i>      | Mitchell, 1962    | 2  |
| Nomadinae | Epeolini  | <i>Epeolus</i>    | <i>Epeolus chamaesarachae</i> | Onuferko, 2018    | 4  |
| Nomadinae | Epeolini  | <i>Epeolus</i>    | <i>Epeolus claripennis</i>    | Friese, 1908      | 1  |
| Nomadinae | Epeolini  | <i>Epeolus</i>    | <i>Epeolus compactus</i>      | Cresson, 1878     | 6  |
| Nomadinae | Epeolini  | <i>Epeolus</i>    | <i>Epeolus cruciger</i>       | (Panzer, 1799)    | 15 |
| Nomadinae | Epeolini  | <i>Epeolus</i>    | <i>Epeolus deyrupi</i>        | Onuferko, 2018    | 3  |
| Nomadinae | Epeolini  | <i>Epeolus</i>    | <i>Epeolus diadematus</i>     | Onuferko, 2018    | 1  |

|           |          |                |                               |                   |    |
|-----------|----------|----------------|-------------------------------|-------------------|----|
| Nomadinae | Epeolini | <i>Epeolus</i> | <i>Epeolus erigeronis</i>     | Mitchell, 1962    | 3  |
| Nomadinae | Epeolini | <i>Epeolus</i> | <i>Epeolus fallax</i>         | Morawitz, 1872    | 1  |
| Nomadinae | Epeolini | <i>Epeolus</i> | <i>Epeolus ferrarii</i>       | Onuferko, 2018    | 2  |
| Nomadinae | Epeolini | <i>Epeolus</i> | <i>Epeolus flavociliatus</i>  | Friese, 1899      | 1  |
| Nomadinae | Epeolini | <i>Epeolus</i> | <i>Epeolus flavofasciatus</i> | Smith, 1879       | 2  |
| Nomadinae | Epeolini | <i>Epeolus</i> | <i>Epeolus floridensis</i>    | Mitchell, 1962    | 3  |
| Nomadinae | Epeolini | <i>Epeolus</i> | <i>Epeolus fumipennis</i>     | Say, 1837         | 2  |
| Nomadinae | Epeolini | <i>Epeolus</i> | <i>Epeolus gibbsi</i>         | Onuferko, 2018    | 1  |
| Nomadinae | Epeolini | <i>Epeolus</i> | <i>Epeolus glabratus</i>      | Cresson, 1878     | 3  |
| Nomadinae | Epeolini | <i>Epeolus</i> | <i>Epeolus howardi</i>        | Mitchell, 1962    | 1  |
| Nomadinae | Epeolini | <i>Epeolus</i> | <i>Epeolus ilicis</i>         | Mitchell, 1962    | 1  |
| Nomadinae | Epeolini | <i>Epeolus</i> | <i>Epeolus inornatus</i>      | Onuferko, 2018    | 1  |
| Nomadinae | Epeolini | <i>Epeolus</i> | <i>Epeolus interruptus</i>    | Robertson, 1900   | 4  |
| Nomadinae | Epeolini | <i>Epeolus</i> | <i>Epeolus lectoides</i>      | Robertson, 1901   | 11 |
| Nomadinae | Epeolini | <i>Epeolus</i> | <i>Epeolus lectus</i>         | Cresson, 1878     | 2  |
| Nomadinae | Epeolini | <i>Epeolus</i> | <i>Epeolus luteipennis</i>    | Friese, 1916      | 1  |
| Nomadinae | Epeolini | <i>Epeolus</i> | <i>Epeolus marginatus</i>     | Bischoff, 1930    | 2  |
| Nomadinae | Epeolini | <i>Epeolus</i> | <i>Epeolus mesillae</i>       | (Cockerell, 1895) | 10 |
| Nomadinae | Epeolini | <i>Epeolus</i> | <i>Epeolus minimus</i>        | (Robertson, 1902) | 23 |
| Nomadinae | Epeolini | <i>Epeolus</i> | <i>Epeolus nebulosus</i>      | Onuferko, 2018    | 1  |
| Nomadinae | Epeolini | <i>Epeolus</i> | <i>Epeolus novomexicanus</i>  | Cockerell, 1912   | 2  |
| Nomadinae | Epeolini | <i>Epeolus</i> | <i>Epeolus obscuripes</i>     | Cockerell, 1917   | 3  |
| Nomadinae | Epeolini | <i>Epeolus</i> | <i>Epeolus odyneroides</i>    | Onuferko, 2019    | 1  |
| Nomadinae | Epeolini | <i>Epeolus</i> | <i>Epeolus olympiellus</i>    | Cockerell, 1904   | 27 |
| Nomadinae | Epeolini | <i>Epeolus</i> | <i>Epeolus packeri</i>        | Onuferko, 2018    | 1  |
| Nomadinae | Epeolini | <i>Epeolus</i> | <i>Epeolus pusillus</i>       | Cresson, 1864     | 5  |
| Nomadinae | Epeolini | <i>Epeolus</i> | <i>Epeolus rufulus</i>        | Cockerell, 1941   | 1  |
| Nomadinae | Epeolini | <i>Epeolus</i> | <i>Epeolus schummeli</i>      | Schilling, 1849   | 2  |
| Nomadinae | Epeolini | <i>Epeolus</i> | <i>Epeolus scutellaris</i>    | Say, 1824         | 14 |
| Nomadinae | Epeolini | <i>Epeolus</i> | <i>Epeolus splendidus</i>     | Onuferko, 2018    | 2  |

|           |              |                  |                             |                            |    |
|-----------|--------------|------------------|-----------------------------|----------------------------|----|
| Nomadinae | Epeolini     | <i>Epeolus</i>   | <i>Epeolus tarsalis</i>     | Morawitz, 1874             | 1  |
| Nomadinae | Epeolini     | <i>Epeolus</i>   | <i>Epeolus tessieris</i>    | Onuferko, 2018             | 2  |
| Nomadinae | Epeolini     | <i>Epeolus</i>   | <i>Epeolus transitorius</i> | Eversmann, 1852            | 1  |
| Nomadinae | Epeolini     | <i>Epeolus</i>   | <i>Epeolus variegatus</i>   | (Linnaeus, 1758)           | 11 |
| Nomadinae | Epeolini     | <i>Epeolus</i>   | <i>Epeolus variolosus</i>   | (Holmberg, 1886)           | 3  |
| Nomadinae | Epeolini     | <i>Epeolus</i>   | <i>Epeolus zonatus</i>      | Smith, 1854                | 2  |
| Apinae    | Centridini   | <i>Epicharis</i> | <i>Epicharis angulosa</i>   | Snelling, 1984             | 2  |
| Apinae    | Centridini   | <i>Epicharis</i> | <i>Epicharis lunulata</i>   | Mocsáry, 1898              | 7  |
| Apinae    | Centridini   | <i>Epicharis</i> | <i>Epicharis maculata</i>   | Smith, 1874                | 1  |
| Nomadinae | Ericrocidini | <i>Ericrocis</i> | <i>Ericrocis lata</i>       | (Cresson, 1878)            | 3  |
| Nomadinae | Ericrocidini | <i>Ericrocis</i> | <i>Ericrocis pintada</i>    | Snelling & Zavortink, 1984 | 1  |
| Eucerinae | Eucerini     | <i>Eucera</i>    | <i>Eucera aeolopus</i>      | (Pérez, 1908)              | 1  |
| Eucerinae | Eucerini     | <i>Eucera</i>    | <i>Eucera alborufa</i>      | (Radoszkowski, 1872)       | 1  |
| Eucerinae | Eucerini     | <i>Eucera</i>    | <i>Eucera alfkeni</i>       | (Risch, 2003)              | 1  |
| Eucerinae | Eucerini     | <i>Eucera</i>    | <i>Eucera algira</i>        | (Brullé, 1840)             | 1  |
| Eucerinae | Eucerini     | <i>Eucera</i>    | <i>Eucera alticincta</i>    | (Lepelletier, 1841)        | 2  |
| Eucerinae | Eucerini     | <i>Eucera</i>    | <i>Eucera angustior</i>     | (Cockerell, 1899)          | 1  |
| Eucerinae | Eucerini     | <i>Eucera</i>    | <i>Eucera atriventris</i>   | (Smith, 1854)              | 1  |
| Eucerinae | Eucerini     | <i>Eucera</i>    | <i>Eucera auricauda</i>     | (LaBerge, 1970)            | 3  |
| Eucerinae | Eucerini     | <i>Eucera</i>    | <i>Eucera azteca</i>        | (Hurd & Linsley, 1966)     | 1  |
| Eucerinae | Eucerini     | <i>Eucera</i>    | <i>Eucera bidentata</i>     | (Pérez, 1887)              | 1  |
| Eucerinae | Eucerini     | <i>Eucera</i>    | <i>Eucera caudata</i>       | Friese, 1905               | 1  |
| Eucerinae | Eucerini     | <i>Eucera</i>    | <i>Eucera chrysopyga</i>    | (Pérez, 1879)              | 6  |
| Eucerinae | Eucerini     | <i>Eucera</i>    | <i>Eucera cineraria</i>     | (Eversmann, 1852)          | 8  |
| Eucerinae | Eucerini     | <i>Eucera</i>    | <i>Eucera citrullina</i>    | (Cockerell, 1912)          | 1  |
| Eucerinae | Eucerini     | <i>Eucera</i>    | <i>Eucera clypeata</i>      | (Erichson, 1835)           | 1  |
| Eucerinae | Eucerini     | <i>Eucera</i>    | <i>Eucera cordleyi</i>      | (Viereck, 1905)            | 1  |
| Eucerinae | Eucerini     | <i>Eucera</i>    | <i>Eucera curvitaris</i>    | (Mocsáry, 1879)            | 1  |
| Eucerinae | Eucerini     | <i>Eucera</i>    | <i>Eucera dentata</i>       | (Germar, 1839)             | 12 |
| Eucerinae | Eucerini     | <i>Eucera</i>    | <i>Eucera dimidiata</i>     | (Brullé, 1832)             | 2  |

|           |          |               |                                |                        |    |
|-----------|----------|---------------|--------------------------------|------------------------|----|
| Eucerinae | Eucerini | <i>Eucera</i> | <i>Eucera edwardsii</i>        | (Cresson, 1879)        | 1  |
| Eucerinae | Eucerini | <i>Eucera</i> | <i>Eucera eriocarp</i>         | (Cockerell, 1898)      | 2  |
| Eucerinae | Eucerini | <i>Eucera</i> | <i>Eucera eucnemidea</i>       | (Dours, 1873)          | 1  |
| Eucerinae | Eucerini | <i>Eucera</i> | <i>Eucera fervens</i>          | (Smith, 1879)          | 1  |
| Eucerinae | Eucerini | <i>Eucera</i> | <i>Eucera floralia</i>         | (Smith, 1854)          | 1  |
| Eucerinae | Eucerini | <i>Eucera</i> | <i>Eucera frater</i>           | (Cresson, 1879)        | 1  |
| Eucerinae | Eucerini | <i>Eucera</i> | <i>Eucera fraterna</i>         | Friese, 1911           | 3  |
| Eucerinae | Eucerini | <i>Eucera</i> | <i>Eucera fulva</i>            | (Smith, 1854)          | 1  |
| Eucerinae | Eucerini | <i>Eucera</i> | <i>Eucera furfurea</i>         | (Vachal, 1907)         | 1  |
| Eucerinae | Eucerini | <i>Eucera</i> | <i>Eucera gabbii</i>           | (Cresson, 1879)        | 1  |
| Eucerinae | Eucerini | <i>Eucera</i> | <i>Eucera gaullei</i>          | (Vachal, 1907)         | 1  |
| Eucerinae | Eucerini | <i>Eucera</i> | <i>Eucera glauca</i>           | (Fabricius, 1775)      | 1  |
| Eucerinae | Eucerini | <i>Eucera</i> | <i>Eucera graja</i>            | (Eversmann, 1852)      | 1  |
| Eucerinae | Eucerini | <i>Eucera</i> | <i>Eucera hamata</i>           | (Bradley, 1942)        | 2  |
| Eucerinae | Eucerini | <i>Eucera</i> | <i>Eucera interrupta</i>       | (Bär, 1850)            | 4  |
| Eucerinae | Eucerini | <i>Eucera</i> | <i>Eucera katangensis</i>      | (Cockerell, 1930)      | 1  |
| Eucerinae | Eucerini | <i>Eucera</i> | <i>Eucera katangensis</i>      | (Cockerell, 1930)      | 1  |
| Eucerinae | Eucerini | <i>Eucera</i> | <i>Eucera keiseri</i>          | (Benoist, 1962)        | 1  |
| Eucerinae | Eucerini | <i>Eucera</i> | <i>Eucera kilikiae</i>         | (Risch, 1999)          | 1  |
| Eucerinae | Eucerini | <i>Eucera</i> | <i>Eucera kullenbergi</i>      | (Tkalcu, 1984)         | 1  |
| Eucerinae | Eucerini | <i>Eucera</i> | <i>Eucera labrosa</i>          | Friese, 1911           | 1  |
| Eucerinae | Eucerini | <i>Eucera</i> | <i>Eucera laxiscopa</i>        | (Alfken, 1935)         | 1  |
| Eucerinae | Eucerini | <i>Eucera</i> | <i>Eucera longicornis</i>      | (Linnaeus, 1758)       | 9  |
| Eucerinae | Eucerini | <i>Eucera</i> | <i>Eucera macrognatha</i>      | (Gerstäcker, 1870)     | 1  |
| Eucerinae | Eucerini | <i>Eucera</i> | <i>Eucera malvae</i>           | (Rossi, 1790)          | 37 |
| Eucerinae | Eucerini | <i>Eucera</i> | <i>Eucera michelbacherorum</i> | (Hurd & Linsley, 1964) | 2  |
| Eucerinae | Eucerini | <i>Eucera</i> | <i>Eucera minuta</i>           | (Friese, 1905)         | 1  |
| Eucerinae | Eucerini | <i>Eucera</i> | <i>Eucera mitsukurii</i>       | (Cockerell, 1911)      | 1  |
| Eucerinae | Eucerini | <i>Eucera</i> | <i>Eucera nigrescens</i>       | (Pérez, 1879)          | 58 |
| Eucerinae | Eucerini | <i>Eucera</i> | <i>Eucera nigrilabris</i>      | (Lepelletier, 1841)    | 1  |



|           |            |                  |                               |                          |    |
|-----------|------------|------------------|-------------------------------|--------------------------|----|
| Eucerinae | Eucerini   | <i>Eucera</i>    | <i>Eucera nigrita</i>         | (Friese, 1895)           | 1  |
| Eucerinae | Eucerini   | <i>Eucera</i>    | <i>Eucera nipponensis</i>     | (Pérez, 1905)            | 1  |
| Eucerinae | Eucerini   | <i>Eucera</i>    | <i>Eucera numida</i>          | (Lepelletier, 1841)      | 2  |
| Eucerinae | Eucerini   | <i>Eucera</i>    | <i>Eucera okinawae</i>        | (Friese, 1910)           | 2  |
| Eucerinae | Eucerini   | <i>Eucera</i>    | <i>Eucera pacifica</i>        | (Ayala & Griswold, 2012) | 3  |
| Eucerinae | Eucerini   | <i>Eucera</i>    | <i>Eucera pici</i>            | (Vachal, 1907)           | 1  |
| Eucerinae | Eucerini   | <i>Eucera</i>    | <i>Eucera proxima</i>         | (Morawitz, 1875)         | 1  |
| Eucerinae | Eucerini   | <i>Eucera</i>    | <i>Eucera pruinosa</i>        | (Say, 1837)              | 1  |
| Eucerinae | Eucerini   | <i>Eucera</i>    | <i>Eucera pseudeucnemidea</i> | (Risch, 1997)            | 1  |
| Eucerinae | Eucerini   | <i>Eucera</i>    | <i>Eucera salicariae</i>      | (Lepelletier, 1841)      | 10 |
| Eucerinae | Eucerini   | <i>Eucera</i>    | <i>Eucera sociabilis</i>      | (Smith, 1873)            | 1  |
| Eucerinae | Eucerini   | <i>Eucera</i>    | <i>Eucera spinipes</i>        | (Risch, 2003)            | 1  |
| Eucerinae | Eucerini   | <i>Eucera</i>    | <i>Eucera strenua</i>         | (Cresson, 1879)          | 2  |
| Eucerinae | Eucerini   | <i>Eucera</i>    | <i>Eucera syriaca</i>         | (Dalla Torre, 1896)      | 1  |
| Eucerinae | Eucerini   | <i>Eucera</i>    | <i>Eucera tenuifasciata</i>   | (Friese, 1911)           | 1  |
| Eucerinae | Eucerini   | <i>Eucera</i>    | <i>Eucera vulpes</i>          | (Brullé, 1832)           | 1  |
| Apinae    | Euglossini | <i>Eufriesea</i> | <i>Eufriesea anisochlora</i>  | (Kimsey, 1977)           | 10 |
| Apinae    | Euglossini | <i>Eufriesea</i> | <i>Eufriesea atlantica</i>    | Nemésio, 2008            | 1  |
| Apinae    | Euglossini | <i>Eufriesea</i> | <i>Eufriesea auriceps</i>     | (Friese, 1899)           | 2  |
| Apinae    | Euglossini | <i>Eufriesea</i> | <i>Eufriesea auripes</i>      | (Gribodo, 1882)          | 1  |
| Apinae    | Euglossini | <i>Eufriesea</i> | <i>Eufriesea caerulea</i>     | (Lepelletier, 1841)      | 4  |
| Apinae    | Euglossini | <i>Eufriesea</i> | <i>Eufriesea chalybaea</i>    | (Friese, 1923)           | 1  |
| Apinae    | Euglossini | <i>Eufriesea</i> | <i>Eufriesea chrysopyga</i>   | (Mocsáry, 1898)          | 2  |
| Apinae    | Euglossini | <i>Eufriesea</i> | <i>Eufriesea concava</i>      | (Friese, 1899)           | 2  |
| Apinae    | Euglossini | <i>Eufriesea</i> | <i>Eufriesea corusca</i>      | (Kimsey, 1977)           | 1  |
| Apinae    | Euglossini | <i>Eufriesea</i> | <i>Eufriesea dressleri</i>    | (Kimsey, 1977)           | 1  |
| Apinae    | Euglossini | <i>Eufriesea</i> | <i>Eufriesea flaviventris</i> | (Friese, 1899)           | 1  |
| Apinae    | Euglossini | <i>Eufriesea</i> | <i>Eufriesea lucida</i>       | (Kimsey, 1977)           | 1  |
| Apinae    | Euglossini | <i>Eufriesea</i> | <i>Eufriesea lucifera</i>     | Kimsey, 1977             | 1  |
| Apinae    | Euglossini | <i>Eufriesea</i> | <i>Eufriesea macroglossa</i>  | (Moure, 1965)            | 10 |

|        |            |                  |                               |                        |    |
|--------|------------|------------------|-------------------------------|------------------------|----|
| Apinae | Euglossini | <i>Eufriesea</i> | <i>Eufriesea magrettii</i>    | (Friese, 1899)         | 1  |
| Apinae | Euglossini | <i>Eufriesea</i> | <i>Eufriesea mariana</i>      | (Mocsáry, 1896)        | 2  |
| Apinae | Euglossini | <i>Eufriesea</i> | <i>Eufriesea mexicana</i>     | (Mocsáry, 1897)        | 7  |
| Apinae | Euglossini | <i>Eufriesea</i> | <i>Eufriesea mussitans</i>    | (Fabricius, 1787)      | 1  |
| Apinae | Euglossini | <i>Eufriesea</i> | <i>Eufriesea nigrohirta</i>   | (Friese, 1899)         | 1  |
| Apinae | Euglossini | <i>Eufriesea</i> | <i>Eufriesea nordestina</i>   | (Moure, 1999)          | 8  |
| Apinae | Euglossini | <i>Eufriesea</i> | <i>Eufriesea ornata</i>       | (Mocsáry, 1896)        | 2  |
| Apinae | Euglossini | <i>Eufriesea</i> | <i>Eufriesea pallida</i>      | (Kimsey, 1977)         | 1  |
| Apinae | Euglossini | <i>Eufriesea</i> | <i>Eufriesea pulchra</i>      | (Smith, 1854)          | 2  |
| Apinae | Euglossini | <i>Eufriesea</i> | <i>Eufriesea rufocauda</i>    | (Kimsey, 1977)         | 1  |
| Apinae | Euglossini | <i>Eufriesea</i> | <i>Eufriesea rugosa</i>       | (Friese, 1899)         | 2  |
| Apinae | Euglossini | <i>Eufriesea</i> | <i>Eufriesea schmidtiana</i>  | (Friese, 1925)         | 8  |
| Apinae | Euglossini | <i>Eufriesea</i> | <i>Eufriesea superba</i>      | (Hoffmannsegg, 1817)   | 2  |
| Apinae | Euglossini | <i>Eufriesea</i> | <i>Eufriesea surinamensis</i> | (Linnaeus, 1758)       | 2  |
| Apinae | Euglossini | <i>Eufriesea</i> | <i>Eufriesea tucumana</i>     | (Schrottky, 1902)      | 2  |
| Apinae | Euglossini | <i>Eufriesea</i> | <i>Eufriesea venusta</i>      | (Moure, 1965)          | 1  |
| Apinae | Euglossini | <i>Eufriesea</i> | <i>Eufriesea vidua</i>        | (Moure, 1976)          | 1  |
| Apinae | Euglossini | <i>Eufriesea</i> | <i>Eufriesea violacea</i>     | (Blanchard, 1840)      | 1  |
| Apinae | Euglossini | <i>Eufriesea</i> | <i>Eufriesea violascens</i>   | (Mocsáry, 1898)        | 2  |
| Apinae | Euglossini | <i>Euglossa</i>  | <i>Euglossa allosticta</i>    | Moure, 1969            | 21 |
| Apinae | Euglossini | <i>Euglossa</i>  | <i>Euglossa amazonica</i>     | Dressler, 1982         | 3  |
| Apinae | Euglossini | <i>Euglossa</i>  | <i>Euglossa analis</i>        | Westwood, 1840         | 2  |
| Apinae | Euglossini | <i>Euglossa</i>  | <i>Euglossa annectans</i>     | Dressler, 1982         | 2  |
| Apinae | Euglossini | <i>Euglossa</i>  | <i>Euglossa asarophora</i>    | Moure & Sakagami, 1969 | 19 |
| Apinae | Euglossini | <i>Euglossa</i>  | <i>Euglossa atrovoneta</i>    | Dressler, 1978         | 2  |
| Apinae | Euglossini | <i>Euglossa</i>  | <i>Euglossa augaspis</i>      | Dressler, 1982         | 1  |
| Apinae | Euglossini | <i>Euglossa</i>  | <i>Euglossa azureoviridis</i> | Friese, 1930           | 6  |
| Apinae | Euglossini | <i>Euglossa</i>  | <i>Euglossa bidentata</i>     | Dressler, 1982         | 2  |
| Apinae | Euglossini | <i>Euglossa</i>  | <i>Euglossa bursigera</i>     | Moure, 1970            | 16 |
| Apinae | Euglossini | <i>Euglossa</i>  | <i>Euglossa chalybeata</i>    | Friese, 1925           | 9  |

|        |            |                 |                                |                 |    |
|--------|------------|-----------------|--------------------------------|-----------------|----|
| Apinae | Euglossini | <i>Euglossa</i> | <i>Euglossa championi</i>      | Cheesman, 1929  | 46 |
| Apinae | Euglossini | <i>Euglossa</i> | <i>Euglossa chlorina</i>       | Dressler, 1982  | 4  |
| Apinae | Euglossini | <i>Euglossa</i> | <i>Euglossa cognata</i>        | Moure, 1970     | 6  |
| Apinae | Euglossini | <i>Euglossa</i> | <i>Euglossa cordata</i>        | Linnaeus, 1758  | 5  |
| Apinae | Euglossini | <i>Euglossa</i> | <i>Euglossa crassipunctata</i> | Moure, 1968     | 1  |
| Apinae | Euglossini | <i>Euglossa</i> | <i>Euglossa crininota</i>      | Dressler, 1978  | 2  |
| Apinae | Euglossini | <i>Euglossa</i> | <i>Euglossa cyanaspis</i>      | Moure, 1968     | 1  |
| Apinae | Euglossini | <i>Euglossa</i> | <i>Euglossa cyanura</i>        | Cockerell, 1917 | 2  |
| Apinae | Euglossini | <i>Euglossa</i> | <i>Euglossa cybelia</i>        | Moure, 1968     | 24 |
| Apinae | Euglossini | <i>Euglossa</i> | <i>Euglossa deceptrix</i>      | Moure, 1968     | 1  |
| Apinae | Euglossini | <i>Euglossa</i> | <i>Euglossa decorata</i>       | Smith, 1874     | 3  |
| Apinae | Euglossini | <i>Euglossa</i> | <i>Euglossa despecta</i>       | Moure, 1968     | 9  |
| Apinae | Euglossini | <i>Euglossa</i> | <i>Euglossa dissimula</i>      | Dressler, 1978  | 7  |
| Apinae | Euglossini | <i>Euglossa</i> | <i>Euglossa dodsoni</i>        | Dressler, 1978  | 14 |
| Apinae | Euglossini | <i>Euglossa</i> | <i>Euglossa dressleri</i>      | Moure, 1968     | 6  |
| Apinae | Euglossini | <i>Euglossa</i> | <i>Euglossa erythrochlora</i>  | Moure, 1968     | 3  |
| Apinae | Euglossini | <i>Euglossa</i> | <i>Euglossa flamma</i>         | Moure, 1969     | 19 |
| Apinae | Euglossini | <i>Euglossa</i> | <i>Euglossa fuscifrons</i>     | Dressler, 1982  | 2  |
| Apinae | Euglossini | <i>Euglossa</i> | <i>Euglossa gairdneri</i>      | Dressler, 1982  | 4  |
| Apinae | Euglossini | <i>Euglossa</i> | <i>Euglossa glanntupperi</i>   |                 | 1  |
| Apinae | Euglossini | <i>Euglossa</i> | <i>Euglossa gorgonensis</i>    | Cheesman, 1929  | 14 |
| Apinae | Euglossini | <i>Euglossa</i> | <i>Euglossa hansonii</i>       | Moure, 1965     | 9  |
| Apinae | Euglossini | <i>Euglossa</i> | <i>Euglossa hemichlora</i>     | Cockerell, 1917 | 4  |
| Apinae | Euglossini | <i>Euglossa</i> | <i>Euglossa heterosticta</i>   | Moure, 1968     | 5  |
| Apinae | Euglossini | <i>Euglossa</i> | <i>Euglossa hyacinthina</i>    | Dressler, 1982  | 8  |
| Apinae | Euglossini | <i>Euglossa</i> | <i>Euglossa ignita</i>         | Smith, 1874     | 50 |
| Apinae | Euglossini | <i>Euglossa</i> | <i>Euglossa igniventris</i>    | Friese, 1925    | 5  |
| Apinae | Euglossini | <i>Euglossa</i> | <i>Euglossa imperialis</i>     | Cockerell, 1922 | 88 |
| Apinae | Euglossini | <i>Euglossa</i> | <i>Euglossa inflata</i>        | Roubik, 2004    | 1  |
| Apinae | Euglossini | <i>Euglossa</i> | <i>Euglossa intersecta</i>     | Latreille, 1817 | 4  |

|        |            |                 |                                 |                                      |     |
|--------|------------|-----------------|---------------------------------|--------------------------------------|-----|
| Apinae | Euglossini | <i>Euglossa</i> | <i>Euglossa iopoecila</i>       | Dressler, 1982                       | 135 |
| Apinae | Euglossini | <i>Euglossa</i> | <i>Euglossa ioprosopa</i>       | Dressler, 1982                       | 2   |
| Apinae | Euglossini | <i>Euglossa</i> | <i>Euglossa iopyrrha</i>        | Dressler, 1982                       | 1   |
| Apinae | Euglossini | <i>Euglossa</i> | <i>Euglossa jamaicensis</i>     | Moure, 1968                          | 1   |
| Apinae | Euglossini | <i>Euglossa</i> | <i>Euglossa laevicincta</i>     | Dressler, 1982                       | 1   |
| Apinae | Euglossini | <i>Euglossa</i> | <i>Euglossa liopoda</i>         | Dressler, 1982                       | 1   |
| Apinae | Euglossini | <i>Euglossa</i> | <i>Euglossa lugubris</i>        | Roubik, 2004                         | 1   |
| Apinae | Euglossini | <i>Euglossa</i> | <i>Euglossa macrorhyncha</i>    | Dressler, 1982                       | 1   |
| Apinae | Euglossini | <i>Euglossa</i> | <i>Euglossa maculilabris</i>    | Moure, 1968                          | 11  |
| Apinae | Euglossini | <i>Euglossa</i> | <i>Euglossa milenae</i>         | Bembé, 2007                          | 2   |
| Apinae | Euglossini | <i>Euglossa</i> | <i>Euglossa mixta</i>           | Friese, 1899                         | 42  |
| Apinae | Euglossini | <i>Euglossa</i> | <i>Euglossa modestior</i>       | Dressler, 1982                       | 1   |
| Apinae | Euglossini | <i>Euglossa</i> | <i>Euglossa mourei</i>          | Dressler, 1982                       | 1   |
| Apinae | Euglossini | <i>Euglossa</i> | <i>Euglossa natesi</i>          | Parra, Ospina-Torres & Ramírez, 2006 | 1   |
| Apinae | Euglossini | <i>Euglossa</i> | <i>Euglossa nigropilosa</i>     | Moure, 1965                          | 3   |
| Apinae | Euglossini | <i>Euglossa</i> | <i>Euglossa obtusa</i>          | Dressler, 1978                       | 2   |
| Apinae | Euglossini | <i>Euglossa</i> | <i>Euglossa occidentalis</i>    | Roubik, 2004                         | 1   |
| Apinae | Euglossini | <i>Euglossa</i> | <i>Euglossa oleolucens</i>      | Dressler, 1978                       | 9   |
| Apinae | Euglossini | <i>Euglossa</i> | <i>Euglossa orellana</i>        | Roubik, 2004                         | 10  |
| Apinae | Euglossini | <i>Euglossa</i> | <i>Euglossa paisa</i>           | Ramírez, 2005                        | 2   |
| Apinae | Euglossini | <i>Euglossa</i> | <i>Euglossa parvula</i>         | Dressler, 1982                       | 1   |
| Apinae | Euglossini | <i>Euglossa</i> | <i>Euglossa perfulgens</i>      | Moure, 1967                          | 1   |
| Apinae | Euglossini | <i>Euglossa</i> | <i>Euglossa piliventris</i>     | Guérin, 1844                         | 1   |
| Apinae | Euglossini | <i>Euglossa</i> | <i>Euglossa polita</i>          | Ducke, 1902                          | 1   |
| Apinae | Euglossini | <i>Euglossa</i> | <i>Euglossa prasina</i>         | Dressler, 1982                       | 2   |
| Apinae | Euglossini | <i>Euglossa</i> | <i>Euglossa pseudotownsendi</i> |                                      | 1   |
| Apinae | Euglossini | <i>Euglossa</i> | <i>Euglossa purpurea</i>        | Friese, 1899                         | 2   |
| Apinae | Euglossini | <i>Euglossa</i> | <i>Euglossa retroviridis</i>    | Dressler, 1982                       | 2   |
| Apinae | Euglossini | <i>Euglossa</i> | <i>Euglossa rufipes</i>         | Rasmussen & Skov, 2006               | 2   |
| Apinae | Euglossini | <i>Euglossa</i> | <i>Euglossa rugilabris</i>      | Moure, 1967                          | 2   |

|        |            |                 |                                |                                      |     |
|--------|------------|-----------------|--------------------------------|--------------------------------------|-----|
| Apinae | Euglossini | <i>Euglossa</i> | <i>Euglossa samperi</i>        | Ramírez, 2006                        | 1   |
| Apinae | Euglossini | <i>Euglossa</i> | <i>Euglossa sapphirina</i>     | Moure, 1968                          | 16  |
| Apinae | Euglossini | <i>Euglossa</i> | <i>Euglossa securigera</i>     | Dressler, 1982                       | 3   |
| Apinae | Euglossini | <i>Euglossa</i> | <i>Euglossa stellfeldi</i>     | Moure, 1947                          | 8   |
| Apinae | Euglossini | <i>Euglossa</i> | <i>Euglossa stilbonota</i>     | Dressler, 1982                       | 2   |
| Apinae | Euglossini | <i>Euglossa</i> | <i>Euglossa townsendi</i>      | Cockerell, 1904                      | 8   |
| Apinae | Euglossini | <i>Euglossa</i> | <i>Euglossa tridentata</i>     | Moure, 1970                          | 5   |
| Apinae | Euglossini | <i>Euglossa</i> | <i>Euglossa truncata</i>       | Rebêlo & Moure, 1996                 | 1   |
| Apinae | Euglossini | <i>Euglossa</i> | <i>Euglossa turbinifex</i>     | Dressler, 1978                       | 5   |
| Apinae | Euglossini | <i>Euglossa</i> | <i>Euglossa variabilis</i>     | Friese, 1899                         | 7   |
| Apinae | Euglossini | <i>Euglossa</i> | <i>Euglossa villosa</i>        | Moure, 1968                          | 4   |
| Apinae | Euglossini | <i>Euglossa</i> | <i>Euglossa villosiventris</i> | Moure, 1968                          | 3   |
| Apinae | Euglossini | <i>Euglossa</i> | <i>Euglossa viridifrons</i>    | Dressler, 1982                       | 2   |
| Apinae | Euglossini | <i>Euglossa</i> | <i>Euglossa viridis</i>        | Perty, 1833                          | 3   |
| Apinae | Euglossini | <i>Euglossa</i> | <i>Euglossa viridissima</i>    | Friese, 1899                         | 1   |
| Apinae | Euglossini | <i>Eulaema</i>  | <i>Eulaema athleticana</i>     | Nemésio, 2009                        | 666 |
| Apinae | Euglossini | <i>Eulaema</i>  | <i>Eulaema boliviensis</i>     | Friese, 1898                         | 1   |
| Apinae | Euglossini | <i>Eulaema</i>  | <i>Eulaema bombiformis</i>     | (Packard, 1869)                      | 12  |
| Apinae | Euglossini | <i>Eulaema</i>  | <i>Eulaema choacoana</i>       | Ospina-Torres & Sandino-Franco, 1997 | 1   |
| Apinae | Euglossini | <i>Eulaema</i>  | <i>Eulaema cingulata</i>       | (Fabricius, 1804)                    | 12  |
| Apinae | Euglossini | <i>Eulaema</i>  | <i>Eulaema flavescens</i>      | (Friese, 1899)                       | 2   |
| Apinae | Euglossini | <i>Eulaema</i>  | <i>Eulaema leucopyga</i>       | Friese, 1898                         | 2   |
| Apinae | Euglossini | <i>Eulaema</i>  | <i>Eulaema meriana</i>         | (Olivier, 1789)                      | 11  |
| Apinae | Euglossini | <i>Eulaema</i>  | <i>Eulaema mocsaryi</i>        | (Friese, 1899)                       | 4   |
| Apinae | Euglossini | <i>Eulaema</i>  | <i>Eulaema nigrita</i>         | Lepelletier, 1841                    | 15  |
| Apinae | Euglossini | <i>Eulaema</i>  | <i>Eulaema peruviana</i>       | (Friese, 1903)                       | 1   |
| Apinae | Euglossini | <i>Eulaema</i>  | <i>Eulaema polychroma</i>      | (Mocsáry, 1899)                      | 8   |
| Apinae | Euglossini | <i>Eulaema</i>  | <i>Eulaema polyzona</i>        | (Mocsáry, 1897)                      | 2   |
| Apinae | Euglossini | <i>Eulaema</i>  | <i>Eulaema pseudocingulata</i> | Oliveira, 2006                       | 1   |
| Apinae | Euglossini | <i>Eulaema</i>  | <i>Eulaema seabrai</i>         | Moure, 1960                          | 5   |

|               |               |                     |                                  |                                |    |
|---------------|---------------|---------------------|----------------------------------|--------------------------------|----|
| Apinae        | Euglossini    | <i>Eulaema</i>      | <i>Eulaema sororia</i>           | Dressler & Ospina-Torres, 1997 | 1  |
| Apinae        | Euglossini    | <i>Eulaema</i>      | <i>Eulaema speciosa</i>          | (Mocsáry, 1897)                | 9  |
| Apinae        | Euglossini    | <i>Exaerete</i>     | <i>Exaerete azteca</i>           | Moure, 1964                    | 2  |
| Apinae        | Euglossini    | <i>Exaerete</i>     | <i>Exaerete dentata</i>          | (Linnaeus, 1758)               | 2  |
| Apinae        | Euglossini    | <i>Exaerete</i>     | <i>Exaerete frontalis</i>        | (Guérin, 1844)                 | 7  |
| Apinae        | Euglossini    | <i>Exaerete</i>     | <i>Exaerete lepeletieri</i>      | Oliveira & Nemésio, 2003       | 1  |
| Apinae        | Euglossini    | <i>Exaerete</i>     | <i>Exaerete smaragdina</i>       | (Guérin, 1844)                 | 18 |
| Apinae        | Euglossini    | <i>Exaerete</i>     | <i>Exaerete trochanterica</i>    | (Friese, 1900)                 | 1  |
| Eucerinae     | Exomalopsini  | <i>Exomalopsis</i>  | <i>Exomalopsis solani</i>        | Cockerell, 1896                | 2  |
| Eucerinae     | Exomalopsini  | <i>Exomalopsis</i>  | <i>Exomalopsis solitaria</i>     | Brèthes, 1910                  | 2  |
| Xylocopinae   | Allodapini    | <i>Exoneura</i>     | <i>Exoneura angophorae</i>       | Cockerell, 1912                | 1  |
| Xylocopinae   | Allodapini    | <i>Exoneura</i>     | <i>Exoneura nigrescens</i>       | Friese, 1899                   | 1  |
| Xylocopinae   | Allodapini    | <i>Exoneura</i>     | <i>Exoneura pictifrons</i>       | Alfken, 1907                   | 1  |
| Xylocopinae   | Allodapini    | <i>Exoneura</i>     | <i>Exoneura robusta</i>          | Cockerell, 1922                | 10 |
| Xylocopinae   | Allodapini    | <i>Exoneurella</i>  | <i>Exoneurella eremophila</i>    | (Houston, 1976)                | 1  |
| Xylocopinae   | Allodapini    | <i>Exoneurella</i>  | <i>Exoneurella lawsoni</i>       | (Rayment, 1946)                | 1  |
| Xylocopinae   | Allodapini    | <i>Exoneurella</i>  | <i>Exoneurella setosa</i>        | (Houston, 1976)                | 6  |
| Xylocopinae   | Allodapini    | <i>Exoneurella</i>  | <i>Exoneurella tridentata</i>    | (Houston, 1976)                | 6  |
| Eucerinae     | Eucerini      | <i>Florilegus</i>   | <i>Florilegus condignus</i>      | (Cresson, 1879)                | 3  |
| Eucerinae     | Eucerini      | <i>Florilegus</i>   | <i>Florilegus festivus</i>       | (Smith, 1854)                  | 1  |
| Eucerinae     | Eucerini      | <i>Florilegus</i>   | <i>Florilegus riparius</i>       | Ogloblin, 1955                 | 1  |
| Anthophorinae | Anthophorini  | <i>Habropoda</i>    | <i>Habropoda cineraria</i>       | (Smith, 1879)                  | 1  |
| Anthophorinae | Anthophorini  | <i>Habropoda</i>    | <i>Habropoda laboriosa</i>       | (Fabricius, 1804)              | 7  |
| Anthophorinae | Anthophorini  | <i>Habropoda</i>    | <i>Habropoda sinensis</i>        | Alfken, 1937                   | 2  |
| Anthophorinae | Anthophorini  | <i>Habropoda</i>    | <i>Habropoda tristissima</i>     | (Cockerell, 1904)              | 1  |
| Nomadinae     | Ammobatoidini | <i>Holcopasites</i> | <i>Holcopasites arizonicus</i>   | (Linsley, 1942)                | 1  |
| Nomadinae     | Ammobatoidini | <i>Holcopasites</i> | <i>Holcopasites calliopsidis</i> | (Linsley, 1943)                | 4  |
| Nomadinae     | Ammobatoidini | <i>Holcopasites</i> | <i>Holcopasites illinoiensis</i> | (Robertson, 1891)              | 1  |
| Nomadinae     | Ammobatoidini | <i>Holcopasites</i> | <i>Holcopasites insoletus</i>    | (Linsley, 1942)                | 1  |
| Apinae        | Meliponini    | <i>Homotrigona</i>  | <i>Homotrigona apicalis</i>      | (Smith, 1857)                  | 1  |

|             |                 |                        |                                   |                                       |    |
|-------------|-----------------|------------------------|-----------------------------------|---------------------------------------|----|
| Apinae      | Meliponini      | <i>Homotrigona</i>     | <i>Homotrigona vidua</i>          | (Lepeletier, 1836)                    | 1  |
| Nomadinae   | Ericrocidini    | <i>Hopliphora</i>      | <i>Hopliphora diabolica</i>       | (Friese, 1900)                        | 1  |
| Nomadinae   | Ericrocidini    | <i>Hopliphora</i>      | <i>Hopliphora funereus</i>        | (Smith, 1854)                         | 2  |
| Nomadinae   | Ericrocidini    | <i>Hopliphora</i>      | <i>Hopliphora velutina</i>        | (Lepeletier & Audinet-Serville, 1825) | 2  |
| Nomadinae   | Isepeolini      | <i>Isepeolus</i>       | <i>Isepeolus atripilis</i>        | Roig-Alsina, 1991                     | 1  |
| Nomadinae   | Isepeolini      | <i>Isepeolus</i>       | <i>Isepeolus luctuosus</i>        | (Spinola, 1851)                       | 1  |
| Nomadinae   | Isepeolini      | <i>Isepeolus</i>       | <i>Isepeolus vachali</i>          | Jørgensen, 1912                       | 1  |
| Nomadinae   | Isepeolini      | <i>Isepeolus</i>       | <i>Isepeolus wagenknechti</i>     | Toro & Rojas, 1968                    | 2  |
| Eucerinae   | Tapinotaspidini | <i>Lanthanomelissa</i> | <i>Lanthanomelissa betinae</i>    | Urban, 1996                           | 2  |
| Eucerinae   | Tapinotaspidini | <i>Lanthanomelissa</i> | <i>Lanthanomelissa clementis</i>  | Urban, 1996                           | 1  |
| Eucerinae   | Tapinotaspidini | <i>Lanthanomelissa</i> | <i>Lanthanomelissa discrepans</i> | Holmberg, 1903                        | 3  |
| Eucerinae   | Tapinotaspidini | <i>Lanthanomelissa</i> | <i>Lanthanomelissa magaliae</i>   | Urban, 1996                           | 3  |
| Eucerinae   | Tapinotaspidini | <i>Lanthanomelissa</i> | <i>Lanthanomelissa pampicola</i>  | Urban, 1996                           | 1  |
| Nomadinae   | Protepeolini    | <i>Leiopodus</i>       | <i>Leiopodus singularis</i>       | (Linsley & Michener, 1937)            | 2  |
| Nomadinae   | Protepeolini    | <i>Leiopodus</i>       | <i>Leiopodus trochantericus</i>   | Ducke, 1907                           | 1  |
| Apinae      | Meliponini      | <i>Lepidotrigona</i>   | <i>Lepidotrigona arcifera</i>     | (Cockerell, 1929)                     | 5  |
| Apinae      | Meliponini      | <i>Lestrimelitta</i>   | <i>Lestrimelitta denuncia</i>     | Oliveira & Marchi, 2005               | 2  |
| Apinae      | Meliponini      | <i>Liotrigona</i>      | <i>Liotrigona bitika</i>          | Brooks & Michener, 1988               | 5  |
| Apinae      | Meliponini      | <i>Liotrigona</i>      | <i>Liotrigona kinzelbachi</i>     | Koch, 2010                            | 9  |
| Apinae      | Meliponini      | <i>Liotrigona</i>      | <i>Liotrigona madecassa</i>       | (Saussure, 1890)                      | 14 |
| Apinae      | Meliponini      | <i>Liotrigona</i>      | <i>Liotrigona mahafalya</i>       | Brooks & Michener, 1988               | 6  |
| Xylocopinae | Allodapini      | <i>Macrogalea</i>      | <i>Macrogalea antanosy</i>        | Brooks & Pauly, 2001                  | 1  |
| Xylocopinae | Allodapini      | <i>Macrogalea</i>      | <i>Macrogalea berentyensis</i>    | Brooks & Pauly, 2001                  | 1  |
| Xylocopinae | Allodapini      | <i>Macrogalea</i>      | <i>Macrogalea candida</i>         | (Smith, 1879)                         | 4  |
| Xylocopinae | Allodapini      | <i>Macrogalea</i>      | <i>Macrogalea ellioti</i>         | (Saussure, 1890)                      | 2  |
| Xylocopinae | Allodapini      | <i>Macrogalea</i>      | <i>Macrogalea infernalis</i>      | Michener, 1977                        | 1  |
| Xylocopinae | Allodapini      | <i>Macrogalea</i>      | <i>Macrogalea mombasae</i>        | Cockerell, 1930                       | 2  |
| Xylocopinae | Allodapini      | <i>Macrogalea</i>      | <i>Macrogalea scaevolae</i>       | Brooks & Pauly, 2001                  | 1  |
| Xylocopinae | Allodapini      | <i>Macrogalea</i>      | <i>Macrogalea zanzibarica</i>     | Michener, 1977                        | 1  |
| Nomadinae   | Melectini       | <i>Melecta</i>         | <i>Melecta albifrons</i>          | (Forster, 1771)                       | 16 |

|           |            |                    |                                |                         |    |
|-----------|------------|--------------------|--------------------------------|-------------------------|----|
| Nomadinae | Melectini  | <i>Melecta</i>     | <i>Melecta alexanderi</i>      | Griswold & Parker, 1999 | 4  |
| Nomadinae | Melectini  | <i>Melecta</i>     | <i>Melecta luctuosa</i>        | (Scopoli, 1770)         | 12 |
| Nomadinae | Melectini  | <i>Melecta</i>     | <i>Melecta pacifica</i>        | Cresson, 1878           | 6  |
| Nomadinae | Melectini  | <i>Melecta</i>     | <i>Melecta separata</i>        | Cresson, 1879           | 2  |
| Nomadinae | Melectini  | <i>Melecta</i>     | <i>Melecta thoracica</i>       | Cresson, 1875           | 3  |
| Nomadinae | Isepeolini | <i>Melectoides</i> | <i>Melectoides bellus</i>      | (Jørgensen, 1912)       | 1  |
| Nomadinae | Isepeolini | <i>Melectoides</i> | <i>Melectoides triseriatus</i> | (Friese, 1908)          | 2  |
| Apinae    | Meliponini | <i>Melipona</i>    | <i>Melipona amazonica</i>      | Schulz, 1905            | 1  |
| Apinae    | Meliponini | <i>Melipona</i>    | <i>Melipona asilvai</i>        | Moure, 1971             | 1  |
| Apinae    | Meliponini | <i>Melipona</i>    | <i>Melipona beecheii</i>       | Bennett, 1831           | 8  |
| Apinae    | Meliponini | <i>Melipona</i>    | <i>Melipona bicolor</i>        | Lepeletier, 1836        | 11 |
| Apinae    | Meliponini | <i>Melipona</i>    | <i>Melipona captiosa</i>       | Moure, 1962             | 1  |
| Apinae    | Meliponini | <i>Melipona</i>    | <i>Melipona colimana</i>       | Ayala, 1999             | 3  |
| Apinae    | Meliponini | <i>Melipona</i>    | <i>Melipona compressipes</i>   | (Fabricius, 1804)       | 4  |
| Apinae    | Meliponini | <i>Melipona</i>    | <i>Melipona costaricensis</i>  | Cockerell, 1919         | 4  |
| Apinae    | Meliponini | <i>Melipona</i>    | <i>Melipona crinita</i>        | Moure & Kerr, 1950      | 4  |
| Apinae    | Meliponini | <i>Melipona</i>    | <i>Melipona fasciata</i>       | Latreille, 1811         | 4  |
| Apinae    | Meliponini | <i>Melipona</i>    | <i>Melipona favosa</i>         | (Fabricius, 1798)       | 1  |
| Apinae    | Meliponini | <i>Melipona</i>    | <i>Melipona flavolineata</i>   | Friese, 1900            | 3  |
| Apinae    | Meliponini | <i>Melipona</i>    | <i>Melipona fuliginosa</i>     | Lepeletier, 1836        | 7  |
| Apinae    | Meliponini | <i>Melipona</i>    | <i>Melipona fulva</i>          | Lepeletier, 1836        | 1  |
| Apinae    | Meliponini | <i>Melipona</i>    | <i>Melipona fuscopilosa</i>    | Moure & Kerr, 1950      | 1  |
| Apinae    | Meliponini | <i>Melipona</i>    | <i>Melipona grandis</i>        | Guérin-Ménéville, 1844  | 3  |
| Apinae    | Meliponini | <i>Melipona</i>    | <i>Melipona illota</i>         | Cockerell, 1919         | 1  |
| Apinae    | Meliponini | <i>Melipona</i>    | <i>Melipona illustris</i>      | Schwarz, 1932           | 1  |
| Apinae    | Meliponini | <i>Melipona</i>    | <i>Melipona lateralis</i>      | Erichson, 1848          | 1  |
| Apinae    | Meliponini | <i>Melipona</i>    | <i>Melipona mandacaia</i>      | Smith, 1863             | 1  |
| Apinae    | Meliponini | <i>Melipona</i>    | <i>Melipona marginata</i>      | Lepeletier, 1836        | 1  |
| Apinae    | Meliponini | <i>Melipona</i>    | <i>Melipona melanoventer</i>   | Schwarz, 1932           | 2  |
| Apinae    | Meliponini | <i>Melipona</i>    | <i>Melipona micheneri</i>      | Schwarz, 1951           | 1  |



|           |            |                   |                                 |                          |    |
|-----------|------------|-------------------|---------------------------------|--------------------------|----|
| Apinae    | Meliponini | <i>Melipona</i>   | <i>Melipona nebulosa</i>        | Camargo, 1988            | 1  |
| Apinae    | Meliponini | <i>Melipona</i>   | <i>Melipona ogilviei</i>        | Schwarz, 1932            | 1  |
| Apinae    | Meliponini | <i>Melipona</i>   | <i>Melipona panamica</i>        | Cockerell, 1912          | 1  |
| Apinae    | Meliponini | <i>Melipona</i>   | <i>Melipona quadrifasciata</i>  | Lepeletier, 1836         | 5  |
| Apinae    | Meliponini | <i>Melipona</i>   | <i>Melipona quinquefasciata</i> | Lepeletier, 1836         | 1  |
| Apinae    | Meliponini | <i>Melipona</i>   | <i>Melipona rufiventris</i>     | Lepeletier, 1836         | 3  |
| Apinae    | Meliponini | <i>Melipona</i>   | <i>Melipona scutellaris</i>     | Latreille, 1811          | 4  |
| Apinae    | Meliponini | <i>Melipona</i>   | <i>Melipona seminigra</i>       | Friese, 1903             | 76 |
| Apinae    | Meliponini | <i>Melipona</i>   | <i>Melipona solani</i>          | Cockerell, 1912          | 3  |
| Apinae    | Meliponini | <i>Melipona</i>   | <i>Melipona subnitida</i>       | Ducke, 1910              | 16 |
| Apinae    | Meliponini | <i>Melipona</i>   | <i>Melipona triplaridis</i>     | Cockerell, 1925          | 1  |
| Apinae    | Meliponini | <i>Meliponula</i> | <i>Meliponula bocandei</i>      | (Spinola, 1853)          | 1  |
| Eucerinae | Eucerini   | <i>Melissodes</i> | <i>Melissodes agilis</i>        | Cresson, 1879            | 14 |
| Eucerinae | Eucerini   | <i>Melissodes</i> | <i>Melissodes bicoloratus</i>   | LaBerge, 1961            | 2  |
| Eucerinae | Eucerini   | <i>Melissodes</i> | <i>Melissodes bimaculatus</i>   | (Lepeletier, 1825)       | 8  |
| Eucerinae | Eucerini   | <i>Melissodes</i> | <i>Melissodes bimatrix</i>      | LaBerge, 1961            | 3  |
| Eucerinae | Eucerini   | <i>Melissodes</i> | <i>Melissodes boltoniae</i>     | Robertson, 1905          | 3  |
| Eucerinae | Eucerini   | <i>Melissodes</i> | <i>Melissodes clarkiae</i>      | LaBerge, 1961            | 4  |
| Eucerinae | Eucerini   | <i>Melissodes</i> | <i>Melissodes communis</i>      | Cresson, 1879            | 8  |
| Eucerinae | Eucerini   | <i>Melissodes</i> | <i>Melissodes comptoides</i>    | Robertson, 1898          | 3  |
| Eucerinae | Eucerini   | <i>Melissodes</i> | <i>Melissodes confusus</i>      | Cresson, 1879            | 2  |
| Eucerinae | Eucerini   | <i>Melissodes</i> | <i>Melissodes dagosus</i>       | Cockerell, 1909          | 4  |
| Eucerinae | Eucerini   | <i>Melissodes</i> | <i>Melissodes dentiventris</i>  | Smith, 1854              | 4  |
| Eucerinae | Eucerini   | <i>Melissodes</i> | <i>Melissodes desponsus</i>     | Smith, 1854              | 28 |
| Eucerinae | Eucerini   | <i>Melissodes</i> | <i>Melissodes druriellus</i>    | (Kirby, 1802)            | 33 |
| Eucerinae | Eucerini   | <i>Melissodes</i> | <i>Melissodes grindeliae</i>    | Cockerell, 1898          | 3  |
| Eucerinae | Eucerini   | <i>Melissodes</i> | <i>Melissodes haitiensis</i>    | LaBerge, 1961            | 2  |
| Eucerinae | Eucerini   | <i>Melissodes</i> | <i>Melissodes illatus</i>       | Lovell & Cockerell, 1906 | 10 |
| Eucerinae | Eucerini   | <i>Melissodes</i> | <i>Melissodes lupinus</i>       | Cresson, 1879            | 11 |
| Eucerinae | Eucerini   | <i>Melissodes</i> | <i>Melissodes lutulentus</i>    | LaBerge, 1961            | 2  |

|           |              |                   |                                   |                                        |    |
|-----------|--------------|-------------------|-----------------------------------|----------------------------------------|----|
| Eucerinae | Eucerini     | <i>Melissodes</i> | <i>Melissodes menuachus</i>       | Cresson, 1868                          | 6  |
| Eucerinae | Eucerini     | <i>Melissodes</i> | <i>Melissodes metenuus</i>        | LaBerge, 1961                          | 1  |
| Eucerinae | Eucerini     | <i>Melissodes</i> | <i>Melissodes microstictus</i>    | Cockerell, 1905                        | 5  |
| Eucerinae | Eucerini     | <i>Melissodes</i> | <i>Melissodes nigroaeneus</i>     | (Smith, 1854)                          | 32 |
| Eucerinae | Eucerini     | <i>Melissodes</i> | <i>Melissodes pallidesignatus</i> | Cockerell, 1905                        | 2  |
| Eucerinae | Eucerini     | <i>Melissodes</i> | <i>Melissodes paroselae</i>       | Cockerell, 1905                        | 1  |
| Eucerinae | Eucerini     | <i>Melissodes</i> | <i>Melissodes perlusus</i>        | Cockerell, 1925                        | 1  |
| Eucerinae | Eucerini     | <i>Melissodes</i> | <i>Melissodes perpolitus</i>      | LaBerge, 1961                          | 4  |
| Eucerinae | Eucerini     | <i>Melissodes</i> | <i>Melissodes rivalis</i>         | Cresson, 1872                          | 6  |
| Eucerinae | Eucerini     | <i>Melissodes</i> | <i>Melissodes robustior</i>       | Cockerell, 1915                        | 15 |
| Eucerinae | Eucerini     | <i>Melissodes</i> | <i>Melissodes saponellus</i>      | Cockerell, 1908                        | 2  |
| Eucerinae | Eucerini     | <i>Melissodes</i> | <i>Melissodes semilupinus</i>     | Cockerell, 1905                        | 4  |
| Eucerinae | Eucerini     | <i>Melissodes</i> | <i>Melissodes snowii</i>          | Cresson, 1879                          | 2  |
| Eucerinae | Eucerini     | <i>Melissodes</i> | <i>Melissodes subagilis</i>       | Cockerell, 1905                        | 2  |
| Eucerinae | Eucerini     | <i>Melissodes</i> | <i>Melissodes subillatus</i>      | LaBerge, 1961                          | 6  |
| Eucerinae | Eucerini     | <i>Melissodes</i> | <i>Melissodes tinctus</i>         | LaBerge, 1961                          | 2  |
| Eucerinae | Eucerini     | <i>Melissodes</i> | <i>Melissodes trifasciatus</i>    | Cresson, 1879                          | 1  |
| Eucerinae | Eucerini     | <i>Melissodes</i> | <i>Melissodes trinodis</i>        | Robertson, 1901                        | 7  |
| Eucerinae | Eucerini     | <i>Melissodes</i> | <i>Melissodes tristis</i>         | Cockerell, 1894                        | 6  |
| Eucerinae | Eucerini     | <i>Melissodes</i> | <i>Melissodes utahensis</i>       | LaBerge, 1961                          | 2  |
| Eucerinae | Eucerini     | <i>Melissodes</i> | <i>Melissodes verbesinarum</i>    | Cockerell, 1905                        | 2  |
| Eucerinae | Eucerini     | <i>Melissodes</i> | <i>Melissodes wheeleri</i>        | Cockerell, 1906                        | 5  |
| Eucerinae | Emphorini    | <i>Melitoma</i>   | <i>Melitoma ameghinoi</i>         | (Holmberg, 1903)                       | 5  |
| Eucerinae | Emphorini    | <i>Melitoma</i>   | <i>Melitoma marginella</i>        | (Cresson, 1872)                        | 1  |
| Eucerinae | Emphorini    | <i>Melitoma</i>   | <i>Melitoma segmentaria</i>       | (Fabricius, 1804)                      | 1  |
| Eucerinae | Emphorini    | <i>Melitoma</i>   | <i>Melitoma taurea</i>            | (Say, 1837)                            | 8  |
| Nomadinae | Ericrocidini | <i>Mesoplia</i>   | <i>Mesoplia azurea</i>            | (Lepelletier & Audinet-Serville, 1825) | 1  |
| Nomadinae | Ericrocidini | <i>Mesoplia</i>   | <i>Mesoplia insignis</i>          | (Smith, 1879)                          | 1  |
| Nomadinae | Ericrocidini | <i>Mesoplia</i>   | <i>Mesoplia regalis</i>           | (Smith, 1854)                          | 1  |
| Nomadinae | Ericrocidini | <i>Mesoplia</i>   | <i>Mesoplia rufipes</i>           | (Perty, 1833)                          | 2  |

|           |            |                 |                               |                        |    |
|-----------|------------|-----------------|-------------------------------|------------------------|----|
| Apinae    | Meliponini | <i>Mourella</i> | <i>Mourella caerulea</i>      | (Friese, 1900)         | 33 |
| Nomadinae | Neolarrini | <i>Neolarra</i> | <i>Neolarra orbiculata</i>    | Shanks, 1978           | 1  |
| Nomadinae | Neolarrini | <i>Neolarra</i> | <i>Neolarra vigilans</i>      | (Cockerell, 1895)      | 2  |
| Nomadinae | Nomadini   | <i>Nomada</i>   | <i>Nomada alboguttata</i>     | Herrich-Schäffer, 1839 | 13 |
| Nomadinae | Nomadini   | <i>Nomada</i>   | <i>Nomada argapa</i>          |                        | 1  |
| Nomadinae | Nomadini   | <i>Nomada</i>   | <i>Nomada argentata</i>       | Herrich-Schäffer, 1839 | 3  |
| Nomadinae | Nomadini   | <i>Nomada</i>   | <i>Nomada armata</i>          | Herrich-Schäffer, 1839 | 5  |
| Nomadinae | Nomadini   | <i>Nomada</i>   | <i>Nomada armatella</i>       | Cockerell, 1903        | 3  |
| Nomadinae | Nomadini   | <i>Nomada</i>   | <i>Nomada articulata</i>      | Smith, 1854            | 10 |
| Nomadinae | Nomadini   | <i>Nomada</i>   | <i>Nomada atrocuteellaris</i> | Strand, 1921           | 3  |
| Nomadinae | Nomadini   | <i>Nomada</i>   | <i>Nomada australensis</i>    | Perkins, 1912          | 11 |
| Nomadinae | Nomadini   | <i>Nomada</i>   | <i>Nomada australis</i>       | Mitchell, 1962         | 3  |
| Nomadinae | Nomadini   | <i>Nomada</i>   | <i>Nomada bella</i>           | Cresson, 1863          | 7  |
| Nomadinae | Nomadini   | <i>Nomada</i>   | <i>Nomada bethunei</i>        | Cockerell, 1903        | 10 |
| Nomadinae | Nomadini   | <i>Nomada</i>   | <i>Nomada bifasciata</i>      | Olivier, 1811          | 14 |
| Nomadinae | Nomadini   | <i>Nomada</i>   | <i>Nomada bluethgeni</i>      | Stoekert, 1943         | 2  |
| Nomadinae | Nomadini   | <i>Nomada</i>   | <i>Nomada castellana</i>      | Dusmet y Alonso, 1913  | 5  |
| Nomadinae | Nomadini   | <i>Nomada</i>   | <i>Nomada conjungens</i>      | Herrich-Schäffer, 1839 | 5  |
| Nomadinae | Nomadini   | <i>Nomada</i>   | <i>Nomada cressonii</i>       | Robertson, 1893        | 11 |
| Nomadinae | Nomadini   | <i>Nomada</i>   | <i>Nomada cubensis</i>        | Cresson, 1865          | 2  |
| Nomadinae | Nomadini   | <i>Nomada</i>   | <i>Nomada cuneata</i>         | (Robertson, 1903)      | 5  |
| Nomadinae | Nomadini   | <i>Nomada</i>   | <i>Nomada dentariae</i>       | (Robertson, 1903)      | 1  |
| Nomadinae | Nomadini   | <i>Nomada</i>   | <i>Nomada denticulata</i>     | Robertson, 1902        | 7  |
| Nomadinae | Nomadini   | <i>Nomada</i>   | <i>Nomada depressa</i>        | Cresson, 1863          | 9  |
| Nomadinae | Nomadini   | <i>Nomada</i>   | <i>Nomada distinguenda</i>    | Morawitz, 1874         | 10 |
| Nomadinae | Nomadini   | <i>Nomada</i>   | <i>Nomada emarginata</i>      | Morawitz, 1877         | 3  |
| Nomadinae | Nomadini   | <i>Nomada</i>   | <i>Nomada fabriciana</i>      | (Linné, 1767)          | 24 |
| Nomadinae | Nomadini   | <i>Nomada</i>   | <i>Nomada facilis</i>         | Schwarz, 1967          | 5  |
| Nomadinae | Nomadini   | <i>Nomada</i>   | <i>Nomada femoralis</i>       | Morawitz, 1869         | 3  |
| Nomadinae | Nomadini   | <i>Nomada</i>   | <i>Nomada ferruginata</i>     | (Linné, 1767)          | 9  |

|           |          |               |                             |                      |    |
|-----------|----------|---------------|-----------------------------|----------------------|----|
| Nomadinae | Nomadini | <i>Nomada</i> | <i>Nomada fervida</i>       | Smith, 1854          | 7  |
| Nomadinae | Nomadini | <i>Nomada</i> | <i>Nomada flava</i>         | Panzer, 1798         | 18 |
| Nomadinae | Nomadini | <i>Nomada</i> | <i>Nomada flavoguttata</i>  | (Kirby, 1802)        | 53 |
| Nomadinae | Nomadini | <i>Nomada</i> | <i>Nomada flavopicta</i>    | (Kirby, 1802)        | 16 |
| Nomadinae | Nomadini | <i>Nomada</i> | <i>Nomada fragariae</i>     | Mitchell, 1962       | 2  |
| Nomadinae | Nomadini | <i>Nomada</i> | <i>Nomada fucata</i>        | Panzer, 1798         | 15 |
| Nomadinae | Nomadini | <i>Nomada</i> | <i>Nomada fulvicornis</i>   | Fabricius, 1793      | 10 |
| Nomadinae | Nomadini | <i>Nomada</i> | <i>Nomada furva</i>         | Panzer, 1798         | 1  |
| Nomadinae | Nomadini | <i>Nomada</i> | <i>Nomada fuscicornis</i>   | Nylander, 1848       | 9  |
| Nomadinae | Nomadini | <i>Nomada</i> | <i>Nomada goodeniana</i>    | (Kirby, 1802)        | 18 |
| Nomadinae | Nomadini | <i>Nomada</i> | <i>Nomada gracilis</i>      | Cresson, 1863        | 4  |
| Nomadinae | Nomadini | <i>Nomada</i> | <i>Nomada gutierreziae</i>  | Cockerell, 1896      | 3  |
| Nomadinae | Nomadini | <i>Nomada</i> | <i>Nomada guttulata</i>     | Schenck, 1861        | 6  |
| Nomadinae | Nomadini | <i>Nomada</i> | <i>Nomada hirtipes</i>      | Pérez, 1884          | 4  |
| Nomadinae | Nomadini | <i>Nomada</i> | <i>Nomada hydrophylli</i>   | Swenk, 1915          | 1  |
| Nomadinae | Nomadini | <i>Nomada</i> | <i>Nomada illinoensis</i>   | Robertson, 1900      | 8  |
| Nomadinae | Nomadini | <i>Nomada</i> | <i>Nomada imbricata</i>     | Smith, 1854          | 12 |
| Nomadinae | Nomadini | <i>Nomada</i> | <i>Nomada inepta</i>        | Mitchell, 1962       | 3  |
| Nomadinae | Nomadini | <i>Nomada</i> | <i>Nomada integra</i>       | Brullé, 1832         | 5  |
| Nomadinae | Nomadini | <i>Nomada</i> | <i>Nomada japonica</i>      | Smith, 1873          | 1  |
| Nomadinae | Nomadini | <i>Nomada</i> | <i>Nomada kohli</i>         | Schmiedeknecht, 1882 | 1  |
| Nomadinae | Nomadini | <i>Nomada</i> | <i>Nomada krugii</i>        | Cresson, 1878        | 1  |
| Nomadinae | Nomadini | <i>Nomada</i> | <i>Nomada lathburiana</i>   | (Kirby, 1802)        | 12 |
| Nomadinae | Nomadini | <i>Nomada</i> | <i>Nomada lehighensis</i>   | Cockerell, 1903      | 20 |
| Nomadinae | Nomadini | <i>Nomada</i> | <i>Nomada lepida</i>        | Cresson, 1863        | 7  |
| Nomadinae | Nomadini | <i>Nomada</i> | <i>Nomada leucophthalma</i> | (Kirby, 1802)        | 14 |
| Nomadinae | Nomadini | <i>Nomada</i> | <i>Nomada luteoloides</i>   | Robertson, 1895      | 2  |
| Nomadinae | Nomadini | <i>Nomada</i> | <i>Nomada maculata</i>      | Cresson, 1863        | 12 |
| Nomadinae | Nomadini | <i>Nomada</i> | <i>Nomada marshamella</i>   | (Kirby, 1802)        | 19 |
| Nomadinae | Nomadini | <i>Nomada</i> | <i>Nomada melathoracica</i> | Imhoff, 1834         | 2  |

|           |          |               |                             |                          |    |
|-----------|----------|---------------|-----------------------------|--------------------------|----|
| Nomadinae | Nomadini | <i>Nomada</i> | <i>Nomada minuscula</i>     | Noskiewicz, 1930         | 15 |
| Nomadinae | Nomadini | <i>Nomada</i> | <i>Nomada moeschleri</i>    | Alfken, 1913             | 3  |
| Nomadinae | Nomadini | <i>Nomada</i> | <i>Nomada mutabilis</i>     | Morawitz, 1870           | 3  |
| Nomadinae | Nomadini | <i>Nomada</i> | <i>Nomada mutica</i>        | Morawitz, 1872           | 2  |
| Nomadinae | Nomadini | <i>Nomada</i> | <i>Nomada nobilis</i>       | Herrich-Schäffer, 1839   | 2  |
| Nomadinae | Nomadini | <i>Nomada</i> | <i>Nomada obscura</i>       | Zetterstedt, 1838        | 4  |
| Nomadinae | Nomadini | <i>Nomada</i> | <i>Nomada obtusifrons</i>   | Nylander, 1848           | 5  |
| Nomadinae | Nomadini | <i>Nomada</i> | <i>Nomada opaca</i>         | Alfken, 1913             | 3  |
| Nomadinae | Nomadini | <i>Nomada</i> | <i>Nomada ovata</i>         | (Robertson, 1903)        | 1  |
| Nomadinae | Nomadini | <i>Nomada</i> | <i>Nomada panzeri</i>       | Lepeletier, 1841         | 43 |
| Nomadinae | Nomadini | <i>Nomada</i> | <i>Nomada perplexa</i>      | Cresson, 1863            | 10 |
| Nomadinae | Nomadini | <i>Nomada</i> | <i>Nomada pilipes</i>       | (Cresson, 1865)          | 1  |
| Nomadinae | Nomadini | <i>Nomada</i> | <i>Nomada pleurosticta</i>  | Herrich-Schäffer, 1839   | 4  |
| Nomadinae | Nomadini | <i>Nomada</i> | <i>Nomada posthuma</i>      | Blüthgen, 1949           | 13 |
| Nomadinae | Nomadini | <i>Nomada</i> | <i>Nomada pygmaea</i>       | Cresson, 1863            | 10 |
| Nomadinae | Nomadini | <i>Nomada</i> | <i>Nomada rhenana</i>       | Morawitz, 1872           | 2  |
| Nomadinae | Nomadini | <i>Nomada</i> | <i>Nomada roberjeotiana</i> | Panzer, 1799             | 7  |
| Nomadinae | Nomadini | <i>Nomada</i> | <i>Nomada rostrata</i>      | Herrich-Schäffer, 1839   | 2  |
| Nomadinae | Nomadini | <i>Nomada</i> | <i>Nomada ruficornis</i>    | (Linnaeus, 1758)         | 33 |
| Nomadinae | Nomadini | <i>Nomada</i> | <i>Nomada rufipes</i>       | Fabricius, 1793          | 14 |
| Nomadinae | Nomadini | <i>Nomada</i> | <i>Nomada sayi</i>          | Robertson, 1893          | 2  |
| Nomadinae | Nomadini | <i>Nomada</i> | <i>Nomada sexfasciata</i>   | Panzer, 1799             | 4  |
| Nomadinae | Nomadini | <i>Nomada</i> | <i>Nomada sheppardana</i>   | (Kirby, 1802)            | 4  |
| Nomadinae | Nomadini | <i>Nomada</i> | <i>Nomada signata</i>       | Jurine, 1807             | 10 |
| Nomadinae | Nomadini | <i>Nomada</i> | <i>Nomada similis</i>       | Morawitz, 1872           | 5  |
| Nomadinae | Nomadini | <i>Nomada</i> | <i>Nomada stigma</i>        | Fabricius, 1804          | 2  |
| Nomadinae | Nomadini | <i>Nomada</i> | <i>Nomada striata</i>       | Fabricius, 1793          | 10 |
| Nomadinae | Nomadini | <i>Nomada</i> | <i>Nomada subrutila</i>     | Lovell & Cockerell, 1905 | 8  |
| Nomadinae | Nomadini | <i>Nomada</i> | <i>Nomada succincta</i>     | Panzer, 1798             | 13 |
| Nomadinae | Nomadini | <i>Nomada</i> | <i>Nomada symphyti</i>      | Stoekert, 1930           | 1  |

|           |                 |                       |                                  |                         |    |
|-----------|-----------------|-----------------------|----------------------------------|-------------------------|----|
| Nomadinae | Nomadini        | <i>Nomada</i>         | <i>Nomada texana</i>             | Cresson, 1872           | 7  |
| Nomadinae | Nomadini        | <i>Nomada</i>         | <i>Nomada tibialis</i>           | Cresson, 1865           | 1  |
| Nomadinae | Nomadini        | <i>Nomada</i>         | <i>Nomada tiftonensis</i>        | Cockerell, 1903         | 7  |
| Nomadinae | Nomadini        | <i>Nomada</i>         | <i>Nomada valida</i>             | Smith, 1854             | 1  |
| Nomadinae | Nomadini        | <i>Nomada</i>         | <i>Nomada vegana</i>             | Cockerell, 1903         | 1  |
| Nomadinae | Nomadini        | <i>Nomada</i>         | <i>Nomada vicina</i>             | Cresson, 1863           | 6  |
| Nomadinae | Nomadini        | <i>Nomada</i>         | <i>Nomada villosa</i>            | Thomson, 1870           | 2  |
| Nomadinae | Nomadini        | <i>Nomada</i>         | <i>Nomada zonata</i>             | Panzer, 1798            | 7  |
| Nomadinae | Ammobatini      | <i>Oreopasites</i>    | <i>Oreopasites barbarae</i>      | Rozen, 1992             | 1  |
| Nomadinae | Ammobatini      | <i>Oreopasites</i>    | <i>Oreopasites vanduzeei</i>     | Cockerell, 1925         | 2  |
| Eucerinae | Tapinotaspidini | <i>Paratetrapedia</i> | <i>Paratetrapedia connexa</i>    | (Vachal, 1909)          | 1  |
| Eucerinae | Tapinotaspidini | <i>Paratetrapedia</i> | <i>Paratetrapedia danunciae</i>  | (Aguiar and Melo, 2007) | 2  |
| Eucerinae | Tapinotaspidini | <i>Paratetrapedia</i> | <i>Paratetrapedia diamantina</i> | (Aguiar and Melo, 2015) | 1  |
| Eucerinae | Tapinotaspidini | <i>Paratetrapedia</i> | <i>Paratetrapedia duckei</i>     | (Friese, 1910)          | 1  |
| Eucerinae | Tapinotaspidini | <i>Paratetrapedia</i> | <i>Paratetrapedia punctata</i>   | Aguiar and Melo, 2011   | 1  |
| Eucerinae | Tapinotaspidini | <i>Paratetrapedia</i> | <i>Paratetrapedia volatilis</i>  | (Smith, 1879)           | 1  |
| Apinae    | Meliponini      | <i>Partamona</i>      | <i>Partamona bilineata</i>       | (Say, 1837)             | 16 |
| Apinae    | Meliponini      | <i>Partamona</i>      | <i>Partamona grandipennis</i>    | (Schwarz, 1951)         | 1  |
| Apinae    | Meliponini      | <i>Partamona</i>      | <i>Partamona helleri</i>         | (Friese, 1900)          | 3  |
| Apinae    | Meliponini      | <i>Partamona</i>      | <i>Partamona mulata</i>          | Moure, 1980             | 50 |
| Apinae    | Meliponini      | <i>Partamona</i>      | <i>Partamona musarum</i>         | (Cockerell, 1917)       | 3  |
| Apinae    | Meliponini      | <i>Partamona</i>      | <i>Partamona orizabaensis</i>    | (Strand, 1919)          | 26 |
| Apinae    | Meliponini      | <i>Plebeia</i>        | <i>Plebeia franki</i>            | (Friese, 1900)          | 1  |
| Apinae    | Meliponini      | <i>Plebeia</i>        | <i>Plebeia frontalis</i>         | (Friese, 1911)          | 20 |
| Apinae    | Meliponini      | <i>Plebeia</i>        | <i>Plebeia jatiformis</i>        | (Cockerell, 1912)       | 1  |
| Apinae    | Meliponini      | <i>Plebeia</i>        | <i>Plebeia pulchra</i>           | Ayala, 1999             | 3  |
| Apinae    | Meliponini      | <i>Plebeia</i>        | <i>Plebeia remota</i>            | (Holmberg, 1903)        | 65 |
| Eucerinae | Emphorini       | <i>Ptilothrix</i>     | <i>Ptilothrix bombiformis</i>    | (Cresson, 1879)         | 14 |
| Eucerinae | Emphorini       | <i>Ptilothrix</i>     | <i>Ptilothrix nemoralis</i>      | Roig-Alsina, 2007       | 1  |
| Eucerinae | Emphorini       | <i>Ptilothrix</i>     | <i>Ptilothrix relata</i>         | (Holmberg, 1903)        | 2  |

|           |            |                      |                                       |                          |      |
|-----------|------------|----------------------|---------------------------------------|--------------------------|------|
| Eucerinae | Emphorini  | <i>Ptilothrix</i>    | <i>Ptilothrix sumichrasti</i>         | (Cresson, 1879)          | 1    |
| Apinae    | Meliponini | <i>Ptilotrigona</i>  | <i>Ptilotrigona occidentalis</i>      | (Schulz, 1904)           | 4    |
| Apinae    | Meliponini | <i>Scaptotrigona</i> | <i>Scaptotrigona hellwegeri</i>       | (Friese, 1900)           | 18   |
| Apinae    | Meliponini | <i>Scaptotrigona</i> | <i>Scaptotrigona luteipennis</i>      | (Friese, 1902)           | 7    |
| Apinae    | Meliponini | <i>Scaptotrigona</i> | <i>Scaptotrigona mexicana</i>         | (Guérin, 1844)           | 41   |
| Apinae    | Meliponini | <i>Scaptotrigona</i> | <i>Scaptotrigona pectoralis</i>       | (Dalla Torre, 1896)      | 40   |
| Apinae    | Meliponini | <i>Scaptotrigona</i> | <i>Scaptotrigona polysticta</i>       | Moure, 1950              | 1    |
| Apinae    | Meliponini | <i>Scaptotrigona</i> | <i>Scaptotrigona postica</i>          | (Latreille, 1807)        | 2    |
| Apinae    | Meliponini | <i>Scaptotrigona</i> | <i>Scaptotrigona subobscuripennis</i> | (Schwarz, 1951)          | 13   |
| Apinae    | Meliponini | <i>Scaptotrigona</i> | <i>Scaptotrigona xanthotricha</i>     | Moure, 1950              | 1    |
| Apinae    | Meliponini | <i>Scaura</i>        | <i>Scaura atlantica</i>               | Melo, 2004               | 1    |
| Apinae    | Meliponini | <i>Scaura</i>        | <i>Scaura latitarsis</i>              | (Friese, 1900)           | 3    |
| Apinae    | Meliponini | <i>Scaura</i>        | <i>Scaura longula</i>                 | (Lepelletier, 1836)      | 1    |
| Apinae    | Meliponini | <i>Scaura</i>        | <i>Scaura tenuis</i>                  | (Ducke, 1916)            | 3    |
| Eucerinae | Eucerini   | <i>Svastra</i>       | <i>Svastra aegis</i>                  | (LaBerge, 1956)          | 1    |
| Eucerinae | Eucerini   | <i>Svastra</i>       | <i>Svastra atripes</i>                | (Cresson, 1872)          | 1    |
| Eucerinae | Eucerini   | <i>Svastra</i>       | <i>Svastra machaerantherae</i>        | (Cockerell, 1904)        | 2    |
| Eucerinae | Eucerini   | <i>Svastra</i>       | <i>Svastra obliqua</i>                | (Say, 1837)              | 6    |
| Eucerinae | Eucerini   | <i>Svastra</i>       | <i>Svastra texana</i>                 | (Cresson, 1872)          | 1    |
| Apinae    | Meliponini | <i>Tetragona</i>     | <i>Tetragona perangulata</i>          | (Cockerell, 1917)        | 6    |
| Apinae    | Meliponini | <i>Tetragona</i>     | <i>Tetragona zieglerei</i>            | (Friese, 1900)           | 6    |
| Apinae    | Meliponini | <i>Tetragonisca</i>  | <i>Tetragonisca angustula</i>         | (Latreille, 1811)        | 1019 |
| Apinae    | Meliponini | <i>Tetragonisca</i>  | <i>Tetragonisca buchwaldi</i>         | (Friese, 1925)           | 1    |
| Apinae    | Meliponini | <i>Tetragonisca</i>  | <i>Tetragonisca fiebrigi</i>          | (Schwarz, 1938)          | 1    |
| Apinae    | Meliponini | <i>Tetragonisca</i>  | <i>Tetragonisca weyrauchi</i>         | (Schwarz, 1943)          | 1    |
| Apinae    | Meliponini | <i>Tetragonula</i>   | <i>Tetragonula carbonaria</i>         | (Smith, 1854)            | 1    |
| Apinae    | Meliponini | <i>Tetragonula</i>   | <i>Tetragonula iridipennis</i>        | (Smith, 1854)            | 1    |
| Eucerinae | Eucerini   | <i>Thygater</i>      | <i>Thygater anae</i>                  | Urban, 1999              | 3    |
| Eucerinae | Eucerini   | <i>Thygater</i>      | <i>Thygater analis</i>                | (Lepelletier, 1841)      | 12   |
| Eucerinae | Eucerini   | <i>Thygater</i>      | <i>Thygater carijo</i>                | Freitas & Silveira, 2018 | 6    |

|           |           |                   |                                |                          |    |
|-----------|-----------|-------------------|--------------------------------|--------------------------|----|
| Eucerinae | Eucerini  | <i>Thygater</i>   | <i>Thygater chaetaspis</i>     | Moure, 1941              | 4  |
| Eucerinae | Eucerini  | <i>Thygater</i>   | <i>Thygater danunciae</i>      | Freitas & Silveira, 2017 | 1  |
| Eucerinae | Eucerini  | <i>Thygater</i>   | <i>Thygater latitarsis</i>     | Urban, 1967              | 3  |
| Eucerinae | Eucerini  | <i>Thygater</i>   | <i>Thygater luederwaldti</i>   | (Schrottky, 1910)        | 2  |
| Eucerinae | Eucerini  | <i>Thygater</i>   | <i>Thygater micheneri</i>      | Urban, 1967              | 1  |
| Eucerinae | Eucerini  | <i>Thygater</i>   | <i>Thygater minarum</i>        | Urban, 1999              | 4  |
| Eucerinae | Eucerini  | <i>Thygater</i>   | <i>Thygater mourei</i>         | Urban, 1961              | 1  |
| Eucerinae | Eucerini  | <i>Thygater</i>   | <i>Thygater palliventris</i>   | (Friese, 1908)           | 11 |
| Eucerinae | Eucerini  | <i>Thygater</i>   | <i>Thygater paranaensis</i>    | Urban, 1967              | 5  |
| Eucerinae | Eucerini  | <i>Thygater</i>   | <i>Thygater seabrai</i>        | Urban, 1967              | 1  |
| Eucerinae | Eucerini  | <i>Thygater</i>   | <i>Thygater sordidipennis</i>  | Moure, 1941              | 1  |
| Nomadinae | Melectini | <i>Thyreus</i>    | <i>Thyreus albomaculatus</i>   | (De Geer, 1778)          | 2  |
| Nomadinae | Melectini | <i>Thyreus</i>    | <i>Thyreus bouyssoui</i>       | (Vachal, 1903)           | 1  |
| Nomadinae | Melectini | <i>Thyreus</i>    | <i>Thyreus calceatus</i>       | (Vachal, 1903)           | 1  |
| Nomadinae | Melectini | <i>Thyreus</i>    | <i>Thyreus histrionicus</i>    | (Illiger, 1806)          | 4  |
| Nomadinae | Melectini | <i>Thyreus</i>    | <i>Thyreus nitidulus</i>       | (Fabricius, 1804)        | 7  |
| Nomadinae | Melectini | <i>Thyreus</i>    | <i>Thyreus novaehollandiae</i> | (Lepelletier, 1841)      | 1  |
| Nomadinae | Melectini | <i>Thyreus</i>    | <i>Thyreus orbatus</i>         | (Lepelletier, 1841)      | 4  |
| Nomadinae | Melectini | <i>Thyreus</i>    | <i>Thyreus takaonis</i>        | (Cockerell, 1911)        | 1  |
| Nomadinae | Epeolini  | <i>Triepeolus</i> | <i>Triepeolus bilineatus</i>   | Cockerell, 1949          | 2  |
| Nomadinae | Epeolini  | <i>Triepeolus</i> | <i>Triepeolus brittaini</i>    | Cockerell, 1931          | 5  |
| Nomadinae | Epeolini  | <i>Triepeolus</i> | <i>Triepeolus californicus</i> | (Cresson, 1878)          | 1  |
| Nomadinae | Epeolini  | <i>Triepeolus</i> | <i>Triepeolus concavus</i>     | (Cresson, 1878)          | 1  |
| Nomadinae | Epeolini  | <i>Triepeolus</i> | <i>Triepeolus donatus</i>      | (Smith, 1854)            | 1  |
| Nomadinae | Epeolini  | <i>Triepeolus</i> | <i>Triepeolus intrepidus</i>   | (Smith, 1879)            | 1  |
| Nomadinae | Epeolini  | <i>Triepeolus</i> | <i>Triepeolus mexicanus</i>    | (Cresson, 1878)          | 1  |
| Nomadinae | Epeolini  | <i>Triepeolus</i> | <i>Triepeolus pectoralis</i>   | (Robertson, 1897)        | 1  |
| Nomadinae | Epeolini  | <i>Triepeolus</i> | <i>Triepeolus piscatoris</i>   | ???????????              | 1  |
| Nomadinae | Epeolini  | <i>Triepeolus</i> | <i>Triepeolus remigatus</i>    | (Fabricius, 1804)        | 1  |
| Nomadinae | Epeolini  | <i>Triepeolus</i> | <i>Triepeolus robustus</i>     | (Cresson, 1878)          | 1  |



|             |            |                   |                                 |                   |    |
|-------------|------------|-------------------|---------------------------------|-------------------|----|
| Nomadinae   | Epeolini   | <i>Triepeolus</i> | <i>Triepeolus tristis</i>       | (Smith, 1854)     | 1  |
| Nomadinae   | Epeolini   | <i>Triepeolus</i> | <i>Triepeolus utahensis</i>     | (Cockerell, 1921) | 1  |
| Apinae      | Meliponini | <i>Trigona</i>    | <i>Trigona amalthea</i>         | (Olivier, 1789)   | 3  |
| Apinae      | Meliponini | <i>Trigona</i>    | <i>Trigona chanchamayoensis</i> | Schwarz, 1948     | 1  |
| Apinae      | Meliponini | <i>Trigona</i>    | <i>Trigona cilipes</i>          | (Fabricius, 1804) | 1  |
| Apinae      | Meliponini | <i>Trigona</i>    | <i>Trigona corvina</i>          | Cockerell, 1913   | 7  |
| Apinae      | Meliponini | <i>Trigona</i>    | <i>Trigona ferricauda</i>       | Cockerell, 1917   | 2  |
| Apinae      | Meliponini | <i>Trigona</i>    | <i>Trigona fulviventris</i>     | Guérin, 1844      | 50 |
| Apinae      | Meliponini | <i>Trigona</i>    | <i>Trigona fuscipennis</i>      | Friese, 1900      | 7  |
| Apinae      | Meliponini | <i>Trigona</i>    | <i>Trigona muzoensis</i>        | Schwarz, 1948     | 1  |
| Apinae      | Meliponini | <i>Trigona</i>    | <i>Trigona nigerrima</i>        | Cresson, 1878     | 1  |
| Apinae      | Meliponini | <i>Trigona</i>    | <i>Trigona silvestriana</i>     | (Vachal, 1908)    | 10 |
| Apinae      | Meliponini | <i>Trigona</i>    | <i>Trigona spinipes</i>         | (Fabricius, 1793) | 6  |
| Apinae      | Meliponini | <i>Trigonisca</i> | <i>Trigonisca discolor</i>      | (Wille, 1965)     | 1  |
| Apinae      | Meliponini | <i>Trigonisca</i> | <i>Trigonisca nataliae</i>      | (Moure, 1950)     | 1  |
| Apinae      | Meliponini | <i>Trigonisca</i> | <i>Trigonisca pipioli</i>       | Ayala, 1999       | 1  |
| Xylocopinae | Xylocopini | <i>Xylocopa</i>   | <i>Xylocopa aestuans</i>        | (Linnaeus, 1758)  | 16 |
| Xylocopinae | Xylocopini | <i>Xylocopa</i>   | <i>Xylocopa albinotum</i>       | Matsumura, 1926   | 12 |
| Xylocopinae | Xylocopini | <i>Xylocopa</i>   | <i>Xylocopa amamensis</i>       | Sonan, 1934       | 11 |
| Xylocopinae | Xylocopini | <i>Xylocopa</i>   | <i>Xylocopa appendiculata</i>   | Smith, 1852       | 22 |
| Xylocopinae | Xylocopini | <i>Xylocopa</i>   | <i>Xylocopa basalis</i>         | Smith, 1854       | 3  |
| Xylocopinae | Xylocopini | <i>Xylocopa</i>   | <i>Xylocopa caffra</i>          | (Linnaeus, 1767)  | 3  |
| Xylocopinae | Xylocopini | <i>Xylocopa</i>   | <i>Xylocopa californica</i>     | Cresson, 1864     | 9  |
| Xylocopinae | Xylocopini | <i>Xylocopa</i>   | <i>Xylocopa cubaeca</i>         | Lucas, 1857       | 2  |
| Xylocopinae | Xylocopini | <i>Xylocopa</i>   | <i>Xylocopa dejeanii</i>        | Lepeletier, 1841  | 1  |
| Xylocopinae | Xylocopini | <i>Xylocopa</i>   | <i>Xylocopa erythrina</i>       | Gribodo, 1894     | 2  |
| Xylocopinae | Xylocopini | <i>Xylocopa</i>   | <i>Xylocopa fenestrata</i>      | (Fabricius, 1798) | 2  |
| Xylocopinae | Xylocopini | <i>Xylocopa</i>   | <i>Xylocopa fimbriata</i>       | Fabricius, 1804   | 1  |
| Xylocopinae | Xylocopini | <i>Xylocopa</i>   | <i>Xylocopa flavicollis</i>     | (DeGeer, 1778)    | 1  |
| Xylocopinae | Xylocopini | <i>Xylocopa</i>   | <i>Xylocopa flavifrons</i>      | Matsumura, 1912   | 7  |

|             |            |                 |                                |                    |    |
|-------------|------------|-----------------|--------------------------------|--------------------|----|
| Xylocopinae | Xylocopini | <i>Xylocopa</i> | <i>Xylocopa flavorufa</i>      | (DeGeer, 1778)     | 2  |
| Xylocopinae | Xylocopini | <i>Xylocopa</i> | <i>Xylocopa frontalis</i>      | (Olivier, 1789)    | 55 |
| Xylocopinae | Xylocopini | <i>Xylocopa</i> | <i>Xylocopa griseescens</i>    | Lepeletier, 1841   | 1  |
| Xylocopinae | Xylocopini | <i>Xylocopa</i> | <i>Xylocopa inconstans</i>     | Smith, 1874        | 1  |
| Xylocopinae | Xylocopini | <i>Xylocopa</i> | <i>Xylocopa iridipennis</i>    | Lepeletier, 1841   | 13 |
| Xylocopinae | Xylocopini | <i>Xylocopa</i> | <i>Xylocopa iris</i>           | (Christ, 1791)     | 5  |
| Xylocopinae | Xylocopini | <i>Xylocopa</i> | <i>Xylocopa macrops</i>        | Lepeletier, 1841   | 1  |
| Xylocopinae | Xylocopini | <i>Xylocopa</i> | <i>Xylocopa mexicanorum</i>    | Cockerell, 1912    | 1  |
| Xylocopinae | Xylocopini | <i>Xylocopa</i> | <i>Xylocopa micans</i>         | Lepeletier, 1841   | 51 |
| Xylocopinae | Xylocopini | <i>Xylocopa</i> | <i>Xylocopa mirabilis</i>      | Hurd & Moure, 1963 | 2  |
| Xylocopinae | Xylocopini | <i>Xylocopa</i> | <i>Xylocopa mordax</i>         | Smith, 1874        | 5  |
| Xylocopinae | Xylocopini | <i>Xylocopa</i> | <i>Xylocopa muscaria</i>       | (Fabricius, 1775)  | 1  |
| Xylocopinae | Xylocopini | <i>Xylocopa</i> | <i>Xylocopa nasalis</i>        | Westwood, 1842     | 1  |
| Xylocopinae | Xylocopini | <i>Xylocopa</i> | <i>Xylocopa nigrita</i>        | (Fabricius, 1775)  | 1  |
| Xylocopinae | Xylocopini | <i>Xylocopa</i> | <i>Xylocopa nogueirai</i>      | Hurd & Moure, 1960 | 2  |
| Xylocopinae | Xylocopini | <i>Xylocopa</i> | <i>Xylocopa somalica</i>       | Magretti, 1895     | 1  |
| Xylocopinae | Xylocopini | <i>Xylocopa</i> | <i>Xylocopa sonorina</i>       | Smith, 1874        | 1  |
| Xylocopinae | Xylocopini | <i>Xylocopa</i> | <i>Xylocopa splendidula</i>    | Lepeletier, 1841   | 1  |
| Xylocopinae | Xylocopini | <i>Xylocopa</i> | <i>Xylocopa tranquebarica</i>  | (Fabricius, 1804)  | 1  |
| Xylocopinae | Xylocopini | <i>Xylocopa</i> | <i>Xylocopa tranquebarorum</i> | (Swederus, 1787)   | 1  |
| Xylocopinae | Xylocopini | <i>Xylocopa</i> | <i>Xylocopa valga</i>          | Gerstäcker, 1872   | 3  |
| Xylocopinae | Xylocopini | <i>Xylocopa</i> | <i>Xylocopa varipuncta</i>     | Patton, 1879       | 4  |
| Xylocopinae | Xylocopini | <i>Xylocopa</i> | <i>Xylocopa violacea</i>       | (Linnaeus, 1758)   | 12 |
| Xylocopinae | Xylocopini | <i>Xylocopa</i> | <i>Xylocopa virginica</i>      | (Linnaeus, 1771)   | 93 |
