# Supplementary material for: Shorter, better, faster, stronger? Comparing the identification performance of full-length and mini-DNA barcodes for apid bees (Hymenoptera: Apidae)
Source: Springer Nature journal article supplement (doi:10.1007/s13592-022-00958-x), 2022-09-09
Supplement: MOESM3 [file 13592_2022_958_MOESM3_ESM.pdf]

**Supplementary Table II** List of analyzed sequences with BOLD accession numbers

| <b>BOLD ID</b> | <b>Genus</b>          | <b>Species</b>                      | <b>Original Sequence Label</b> |
|----------------|-----------------------|-------------------------------------|--------------------------------|
| DRBEE05407     | <i>Aglae</i>          | <i>Aglae caerulea</i>               |                                |
| GBAH620309     | <i>Aglae</i>          | <i>Aglae caerulea</i>               |                                |
| GBAH627809     | <i>Aglae</i>          | <i>Aglae caerulea</i>               |                                |
| BOWGF05208     | <i>Alloscirtetica</i> | <i>Alloscirtetica gayi</i>          |                                |
| BOFTW17608     | <i>Alloscirtetica</i> | <i>Alloscirtetica paraguayensis</i> |                                |
| BOWGF04608     | <i>Alloscirtetica</i> | <i>Alloscirtetica tristrigata</i>   |                                |
| BOWGF04708     | <i>Alloscirtetica</i> | <i>Alloscirtetica tristrigata</i>   |                                |
| BEECA94507     | <i>Alloscirtetica</i> | <i>Alloscirtetica weyrauchi</i>     |                                |
| LASNA44208     | <i>Amegilla</i>       | <i>Amegilla acraensis</i>           |                                |
| GBMIN7157917   | <i>Amegilla</i>       | <i>Amegilla adelaidae</i>           |                                |
| GBMIN7158017   | <i>Amegilla</i>       | <i>Amegilla adelaidae</i>           |                                |
| HYQT23009      | <i>Amegilla</i>       | <i>Amegilla aeruginosa</i>          |                                |
| HYQT38710      | <i>Amegilla</i>       | <i>Amegilla aeruginosa</i>          |                                |
| HYQT38810      | <i>Amegilla</i>       | <i>Amegilla aeruginosa</i>          |                                |
| HYQTB22812     | <i>Amegilla</i>       | <i>Amegilla aeruginosa</i>          |                                |
| HYQTB22912     | <i>Amegilla</i>       | <i>Amegilla aeruginosa</i>          |                                |
| HYQTB23812     | <i>Amegilla</i>       | <i>Amegilla aeruginosa</i>          |                                |
| GBMIN7158117   | <i>Amegilla</i>       | <i>Amegilla alpha</i>               |                                |
| GBMIN7158217   | <i>Amegilla</i>       | <i>Amegilla alpha</i>               |                                |
| GBAH1743119    | <i>Amegilla</i>       | <i>Amegilla asserta</i>             |                                |
| GBAH1743219    | <i>Amegilla</i>       | <i>Amegilla asserta</i>             |                                |
| GBAH1744919    | <i>Amegilla</i>       | <i>Amegilla asserta</i>             |                                |
| GBMIN7158317   | <i>Amegilla</i>       | <i>Amegilla asserta</i>             |                                |
| GBMIN7158417   | <i>Amegilla</i>       | <i>Amegilla asserta</i>             |                                |
| GBMIN7158517   | <i>Amegilla</i>       | <i>Amegilla asserta</i>             |                                |
| GBMIN7158617   | <i>Amegilla</i>       | <i>Amegilla asserta</i>             |                                |
| GBMIN7158717   | <i>Amegilla</i>       | <i>Amegilla asserta</i>             |                                |
| GBMIN7158817   | <i>Amegilla</i>       | <i>Amegilla asserta</i>             |                                |
| DOBEE47315     | <i>Amegilla</i>       | <i>Amegilla calceifera</i>          |                                |
| DOBEE48815     | <i>Amegilla</i>       | <i>Amegilla calceifera</i>          |                                |
| DOBEE50315     | <i>Amegilla</i>       | <i>Amegilla calceifera</i>          |                                |
| DOBEE50615     | <i>Amegilla</i>       | <i>Amegilla calceifera</i>          |                                |
| DOBEE50715     | <i>Amegilla</i>       | <i>Amegilla calceifera</i>          |                                |
| SABEE26315     | <i>Amegilla</i>       | <i>Amegilla calceifera</i>          |                                |
| SABEE69115     | <i>Amegilla</i>       | <i>Amegilla calceifera</i>          |                                |
| SABEE69215     | <i>Amegilla</i>       | <i>Amegilla calceifera</i>          |                                |
| SABEE69515     | <i>Amegilla</i>       | <i>Amegilla calceifera</i>          |                                |
| SABEE74715     | <i>Amegilla</i>       | <i>Amegilla calceifera</i>          |                                |
| BOWGF11508     | <i>Amegilla</i>       | <i>Amegilla calens</i>              |                                |
| GBMIN7158917   | <i>Amegilla</i>       | <i>Amegilla cingulata</i>           |                                |
| GBMIN7159017   | <i>Amegilla</i>       | <i>Amegilla cingulata</i>           |                                |
| GCQT100017     | <i>Amegilla</i>       | <i>Amegilla cingulata</i>           |                                |
| MAIMB12409     | <i>Amegilla</i>       | <i>Amegilla cingulata</i>           |                                |

|              |                 |                             |
|--------------|-----------------|-----------------------------|
| PMNHN38415   | <i>Amegilla</i> | <i>Amegilla cingulata</i>   |
| ABBOL02415   | <i>Amegilla</i> | <i>Amegilla dulcifera</i>   |
| ABBOL02515   | <i>Amegilla</i> | <i>Amegilla dulcifera</i>   |
| GBHAP75114   | <i>Amegilla</i> | <i>Amegilla dulcifera</i>   |
| GBHAP75214   | <i>Amegilla</i> | <i>Amegilla dulcifera</i>   |
| ABBOL02215   | <i>Amegilla</i> | <i>Amegilla florea</i>      |
| GBAH1744419  | <i>Amegilla</i> | <i>Amegilla indistincta</i> |
| GBMIN7159117 | <i>Amegilla</i> | <i>Amegilla indistincta</i> |
| GBMIN7159217 | <i>Amegilla</i> | <i>Amegilla karlba</i>      |
| GBMIN7159317 | <i>Amegilla</i> | <i>Amegilla mcnamarae</i>   |
| AUSBS05312   | <i>Amegilla</i> | <i>Amegilla murrayensis</i> |
| GBAH1743819  | <i>Amegilla</i> | <i>Amegilla murrayensis</i> |
| GBAH1743919  | <i>Amegilla</i> | <i>Amegilla murrayensis</i> |
| GBAH1744019  | <i>Amegilla</i> | <i>Amegilla murrayensis</i> |
| GBAH1744119  | <i>Amegilla</i> | <i>Amegilla murrayensis</i> |
| GBAH1744219  | <i>Amegilla</i> | <i>Amegilla murrayensis</i> |
| GBAH1744319  | <i>Amegilla</i> | <i>Amegilla murrayensis</i> |
| GBMIN7159417 | <i>Amegilla</i> | <i>Amegilla murrayensis</i> |
| GBMIN7159517 | <i>Amegilla</i> | <i>Amegilla murrayensis</i> |
| GBMIN7159617 | <i>Amegilla</i> | <i>Amegilla murrayensis</i> |
| GBMIN7159717 | <i>Amegilla</i> | <i>Amegilla murrayensis</i> |
| GBMIN7159817 | <i>Amegilla</i> | <i>Amegilla murrayensis</i> |
| GBMIN7159917 | <i>Amegilla</i> | <i>Amegilla murrayensis</i> |
| GBMIN7160017 | <i>Amegilla</i> | <i>Amegilla murrayensis</i> |
| GBMIN7160117 | <i>Amegilla</i> | <i>Amegilla murrayensis</i> |
| GBMIN7160217 | <i>Amegilla</i> | <i>Amegilla murrayensis</i> |
| GBMIN7160317 | <i>Amegilla</i> | <i>Amegilla murrayensis</i> |
| GBMIN7160417 | <i>Amegilla</i> | <i>Amegilla murrayensis</i> |
| GBMIN7160517 | <i>Amegilla</i> | <i>Amegilla murrayensis</i> |
| HYQT10408    | <i>Amegilla</i> | <i>Amegilla murrayensis</i> |
| HYQTB17212   | <i>Amegilla</i> | <i>Amegilla murrayensis</i> |
| GBAH1820019  | <i>Amegilla</i> | <i>Amegilla nubica</i>      |
| GBAH1744519  | <i>Amegilla</i> | <i>Amegilla paeninsulae</i> |
| GBMIN7160617 | <i>Amegilla</i> | <i>Amegilla paeninsulae</i> |
| GBMIN7160717 | <i>Amegilla</i> | <i>Amegilla paeninsulae</i> |
| GBMIN7160817 | <i>Amegilla</i> | <i>Amegilla paeninsulae</i> |
| GBAH1743319  | <i>Amegilla</i> | <i>Amegilla pulchra</i>     |
| GBAH1743419  | <i>Amegilla</i> | <i>Amegilla pulchra</i>     |
| GBAH1743519  | <i>Amegilla</i> | <i>Amegilla pulchra</i>     |
| GBAH1743619  | <i>Amegilla</i> | <i>Amegilla pulchra</i>     |
| GBAH1743719  | <i>Amegilla</i> | <i>Amegilla pulchra</i>     |
| GBAH1744619  | <i>Amegilla</i> | <i>Amegilla pulchra</i>     |
| GBAH1744719  | <i>Amegilla</i> | <i>Amegilla pulchra</i>     |
| GBAH1744819  | <i>Amegilla</i> | <i>Amegilla pulchra</i>     |
| GBMIN7160917 | <i>Amegilla</i> | <i>Amegilla pulchra</i>     |
| GBMIN7161017 | <i>Amegilla</i> | <i>Amegilla pulchra</i>     |

|              |                 |                                 |
|--------------|-----------------|---------------------------------|
| GBMIN7161117 | <i>Amegilla</i> | <i>Amegilla pulchra</i>         |
| GBMIN7161217 | <i>Amegilla</i> | <i>Amegilla pulchra</i>         |
| GBMIN7161317 | <i>Amegilla</i> | <i>Amegilla pulchra</i>         |
| GBMIN7161417 | <i>Amegilla</i> | <i>Amegilla pulchra</i>         |
| GBMIN7161517 | <i>Amegilla</i> | <i>Amegilla pulchra</i>         |
| GBMIN7161617 | <i>Amegilla</i> | <i>Amegilla pulchra</i>         |
| GBMIN7161717 | <i>Amegilla</i> | <i>Amegilla pulchra</i>         |
| GBMIN7161817 | <i>Amegilla</i> | <i>Amegilla pulchra</i>         |
| GBMIN7161917 | <i>Amegilla</i> | <i>Amegilla pulchra</i>         |
| GBMIN7162017 | <i>Amegilla</i> | <i>Amegilla pulchra</i>         |
| GBMIN7162117 | <i>Amegilla</i> | <i>Amegilla pulchra</i>         |
| GBMIN7162217 | <i>Amegilla</i> | <i>Amegilla pulchra</i>         |
| GBMIN7162317 | <i>Amegilla</i> | <i>Amegilla pulchra</i>         |
| GBMIN7162417 | <i>Amegilla</i> | <i>Amegilla pulchra</i>         |
| GBMIN7162517 | <i>Amegilla</i> | <i>Amegilla pulchra</i>         |
| GBMIN7162617 | <i>Amegilla</i> | <i>Amegilla pulchra</i>         |
| GBMIN7162717 | <i>Amegilla</i> | <i>Amegilla pulchra</i>         |
| GBMIN7162817 | <i>Amegilla</i> | <i>Amegilla pulchra</i>         |
| GBMIN7162917 | <i>Amegilla</i> | <i>Amegilla pulchra</i>         |
| GBMIN7163017 | <i>Amegilla</i> | <i>Amegilla pulchra</i>         |
| GBMIN7163117 | <i>Amegilla</i> | <i>Amegilla pulchra</i>         |
| GBMIN7163217 | <i>Amegilla</i> | <i>Amegilla pulchra</i>         |
| GBMIN7163317 | <i>Amegilla</i> | <i>Amegilla pulchra</i>         |
| GBMIN7163417 | <i>Amegilla</i> | <i>Amegilla pulchra</i>         |
| GCQT47217    | <i>Amegilla</i> | <i>Amegilla pulchra</i>         |
| HYQT29109    | <i>Amegilla</i> | <i>Amegilla pulchra</i>         |
| HYQT50510    | <i>Amegilla</i> | <i>Amegilla pulchra</i>         |
| HYQT76510    | <i>Amegilla</i> | <i>Amegilla pulchra</i>         |
| HYQTB01611   | <i>Amegilla</i> | <i>Amegilla pulchra</i>         |
| HYQTB18912   | <i>Amegilla</i> | <i>Amegilla pulchra</i>         |
| VAQT47109    | <i>Amegilla</i> | <i>Amegilla pulchra</i>         |
| GBAH1615919  | <i>Amegilla</i> | <i>Amegilla quadrifasciata</i>  |
| GBMIN7163517 | <i>Amegilla</i> | <i>Amegilla quadrifasciata</i>  |
| GBAH1743019  | <i>Amegilla</i> | <i>Amegilla thorogoodi</i>      |
| GBMIN7163617 | <i>Amegilla</i> | <i>Amegilla thorogoodi</i>      |
| GBMIN7163717 | <i>Amegilla</i> | <i>Amegilla thorogoodi</i>      |
| GBMIN7163817 | <i>Amegilla</i> | <i>Amegilla thorogoodi</i>      |
| GBMIN7163917 | <i>Amegilla</i> | <i>Amegilla viridicingulata</i> |
| GBAH1742519  | <i>Amegilla</i> | <i>Amegilla walkeri</i>         |
| GBAH1742619  | <i>Amegilla</i> | <i>Amegilla walkeri</i>         |
| GBAH1742719  | <i>Amegilla</i> | <i>Amegilla walkeri</i>         |
| GBAH1742819  | <i>Amegilla</i> | <i>Amegilla walkeri</i>         |
| GBAH1742919  | <i>Amegilla</i> | <i>Amegilla walkeri</i>         |
| GBMIN7164017 | <i>Amegilla</i> | <i>Amegilla walkeri</i>         |
| GBMIN7164117 | <i>Amegilla</i> | <i>Amegilla walkeri</i>         |
| GBMIN7164217 | <i>Amegilla</i> | <i>Amegilla walkeri</i>         |

|              |                      |                                    |
|--------------|----------------------|------------------------------------|
| FBAPC46810   | <i>Ammobatooides</i> | <i>Ammobatooides abdominalis</i>   |
| FBAPC46910   | <i>Ammobatooides</i> | <i>Ammobatooides abdominalis</i>   |
| GBMNB6250120 | <i>Ammobatooides</i> | <i>Ammobatooides radoszkowskii</i> |
| GBAH1820119  | <i>Anthophora</i>    | <i>Anthophora abroniae</i>         |
| GBAH1820219  | <i>Anthophora</i>    | <i>Anthophora abrupta</i>          |
| HYMBB01809   | <i>Anthophora</i>    | <i>Anthophora abrupta</i>          |
| HYMBB02009   | <i>Anthophora</i>    | <i>Anthophora abrupta</i>          |
| HYMBB02209   | <i>Anthophora</i>    | <i>Anthophora abrupta</i>          |
| OPPFQ429217  | <i>Anthophora</i>    | <i>Anthophora abrupta</i>          |
| OUHY00909    | <i>Anthophora</i>    | <i>Anthophora abrupta</i>          |
| BCHYM46013   | <i>Anthophora</i>    | <i>Anthophora aestivalis</i>       |
| FBAPD10011   | <i>Anthophora</i>    | <i>Anthophora aestivalis</i>       |
| FBAPD40911   | <i>Anthophora</i>    | <i>Anthophora aestivalis</i>       |
| FBAPD41011   | <i>Anthophora</i>    | <i>Anthophora aestivalis</i>       |
| FBAPD41111   | <i>Anthophora</i>    | <i>Anthophora aestivalis</i>       |
| FBAPD57211   | <i>Anthophora</i>    | <i>Anthophora aestivalis</i>       |
| FBAPD57311   | <i>Anthophora</i>    | <i>Anthophora aestivalis</i>       |
| FBAPD57511   | <i>Anthophora</i>    | <i>Anthophora aestivalis</i>       |
| FBHAP39209   | <i>Anthophora</i>    | <i>Anthophora aestivalis</i>       |
| FBHAP39309   | <i>Anthophora</i>    | <i>Anthophora aestivalis</i>       |
| GBLGC02312   | <i>Anthophora</i>    | <i>Anthophora aestivalis</i>       |
| GBLGC02512   | <i>Anthophora</i>    | <i>Anthophora aestivalis</i>       |
| GMGMI08514   | <i>Anthophora</i>    | <i>Anthophora aestivalis</i>       |
| GBAH1820419  | <i>Anthophora</i>    | <i>Anthophora albata</i>           |
| FBAPC48511   | <i>Anthophora</i>    | <i>Anthophora balneorum</i>        |
| FBAPC48611   | <i>Anthophora</i>    | <i>Anthophora balneorum</i>        |
| GBAH1820519  | <i>Anthophora</i>    | <i>Anthophora beijingensis</i>     |
| BEEEE08115   | <i>Anthophora</i>    | <i>Anthophora bimaculata</i>       |
| BEEEE20515   | <i>Anthophora</i>    | <i>Anthophora bimaculata</i>       |
| FBACB70211   | <i>Anthophora</i>    | <i>Anthophora bimaculata</i>       |
| FBACB70311   | <i>Anthophora</i>    | <i>Anthophora bimaculata</i>       |
| FBAPB42709   | <i>Anthophora</i>    | <i>Anthophora bimaculata</i>       |
| FBAPB42809   | <i>Anthophora</i>    | <i>Anthophora bimaculata</i>       |
| FBAPB42909   | <i>Anthophora</i>    | <i>Anthophora bimaculata</i>       |
| FBAPC17110   | <i>Anthophora</i>    | <i>Anthophora bimaculata</i>       |
| FBAPC48011   | <i>Anthophora</i>    | <i>Anthophora bimaculata</i>       |
| FBAPC53111   | <i>Anthophora</i>    | <i>Anthophora bimaculata</i>       |
| GBACU08712   | <i>Anthophora</i>    | <i>Anthophora bimaculata</i>       |
| GBACU116212  | <i>Anthophora</i>    | <i>Anthophora bimaculata</i>       |
| GBACU116312  | <i>Anthophora</i>    | <i>Anthophora bimaculata</i>       |
| GBACU122512  | <i>Anthophora</i>    | <i>Anthophora bimaculata</i>       |
| GBACU122612  | <i>Anthophora</i>    | <i>Anthophora bimaculata</i>       |
| GBACU122712  | <i>Anthophora</i>    | <i>Anthophora bimaculata</i>       |
| GBACU122812  | <i>Anthophora</i>    | <i>Anthophora bimaculata</i>       |
| GBACU209913  | <i>Anthophora</i>    | <i>Anthophora bimaculata</i>       |
| GBAH1820619  | <i>Anthophora</i>    | <i>Anthophora bimaculata</i>       |

|             |                   |                                |
|-------------|-------------------|--------------------------------|
| BEECA00406  | <i>Anthophora</i> | <i>Anthophora bomboides</i>    |
| BEECA00506  | <i>Anthophora</i> | <i>Anthophora bomboides</i>    |
| BEECA00606  | <i>Anthophora</i> | <i>Anthophora bomboides</i>    |
| BEECA00706  | <i>Anthophora</i> | <i>Anthophora bomboides</i>    |
| BEECB100507 | <i>Anthophora</i> | <i>Anthophora bomboides</i>    |
| BEECB100607 | <i>Anthophora</i> | <i>Anthophora bomboides</i>    |
| BEECC41108  | <i>Anthophora</i> | <i>Anthophora bomboides</i>    |
| BEECC54508  | <i>Anthophora</i> | <i>Anthophora bomboides</i>    |
| BEECC54608  | <i>Anthophora</i> | <i>Anthophora bomboides</i>    |
| BEECC80109  | <i>Anthophora</i> | <i>Anthophora bomboides</i>    |
| BEECC80409  | <i>Anthophora</i> | <i>Anthophora bomboides</i>    |
| BEECC80509  | <i>Anthophora</i> | <i>Anthophora bomboides</i>    |
| BEECC80609  | <i>Anthophora</i> | <i>Anthophora bomboides</i>    |
| BEECC80709  | <i>Anthophora</i> | <i>Anthophora bomboides</i>    |
| HYMBB01509  | <i>Anthophora</i> | <i>Anthophora bomboides</i>    |
| BBHYA86712  | <i>Anthophora</i> | <i>Anthophora californica</i>  |
| BBHYA86812  | <i>Anthophora</i> | <i>Anthophora californica</i>  |
| BBHYA86912  | <i>Anthophora</i> | <i>Anthophora californica</i>  |
| BEECB47207  | <i>Anthophora</i> | <i>Anthophora californica</i>  |
| BEECB47307  | <i>Anthophora</i> | <i>Anthophora californica</i>  |
| HMBME13907  | <i>Anthophora</i> | <i>Anthophora californica</i>  |
| HYMBB02909  | <i>Anthophora</i> | <i>Anthophora californica</i>  |
| BEECB47407  | <i>Anthophora</i> | <i>Anthophora centriformis</i> |
| BEECB47507  | <i>Anthophora</i> | <i>Anthophora centriformis</i> |
| GBAH1820719 | <i>Anthophora</i> | <i>Anthophora centriformis</i> |
| GBAH1820819 | <i>Anthophora</i> | <i>Anthophora cockerelli</i>   |
| GBAH1820919 | <i>Anthophora</i> | <i>Anthophora columbariae</i>  |
| GBAH1821019 | <i>Anthophora</i> | <i>Anthophora crinipes</i>     |
| GBAH1821119 | <i>Anthophora</i> | <i>Anthophora curta</i>        |
| GBAH1821219 | <i>Anthophora</i> | <i>Anthophora edwardsii</i>    |
| GBAH1821319 | <i>Anthophora</i> | <i>Anthophora estebana</i>     |
| BEECB73407  | <i>Anthophora</i> | <i>Anthophora exigua</i>       |
| BEECB77207  | <i>Anthophora</i> | <i>Anthophora exigua</i>       |
| GBAH1821419 | <i>Anthophora</i> | <i>Anthophora flavocincta</i>  |
| GBAH1821519 | <i>Anthophora</i> | <i>Anthophora fulvicauda</i>   |
| ABEE19417   | <i>Anthophora</i> | <i>Anthophora furcata</i>      |
| BBHYL32010  | <i>Anthophora</i> | <i>Anthophora furcata</i>      |
| BBHYL32310  | <i>Anthophora</i> | <i>Anthophora furcata</i>      |
| BCHYM151713 | <i>Anthophora</i> | <i>Anthophora furcata</i>      |
| BEEEE08215  | <i>Anthophora</i> | <i>Anthophora furcata</i>      |
| BEEEE19615  | <i>Anthophora</i> | <i>Anthophora furcata</i>      |
| CNTIF258615 | <i>Anthophora</i> | <i>Anthophora furcata</i>      |
| CNWBG302613 | <i>Anthophora</i> | <i>Anthophora furcata</i>      |
| CNWLD88312  | <i>Anthophora</i> | <i>Anthophora furcata</i>      |
| CNWLE237512 | <i>Anthophora</i> | <i>Anthophora furcata</i>      |
| CNWLE237612 | <i>Anthophora</i> | <i>Anthophora furcata</i>      |

|              |                   |                                |
|--------------|-------------------|--------------------------------|
| CNWLE247712  | <i>Anthophora</i> | <i>Anthophora furcata</i>      |
| CNWLF198812  | <i>Anthophora</i> | <i>Anthophora furcata</i>      |
| CNWLF205212  | <i>Anthophora</i> | <i>Anthophora furcata</i>      |
| CNWLF207612  | <i>Anthophora</i> | <i>Anthophora furcata</i>      |
| CNWLN155013  | <i>Anthophora</i> | <i>Anthophora furcata</i>      |
| FBAPB43009   | <i>Anthophora</i> | <i>Anthophora furcata</i>      |
| FBAPC17610   | <i>Anthophora</i> | <i>Anthophora furcata</i>      |
| GBAH1821619  | <i>Anthophora</i> | <i>Anthophora furcata</i>      |
| GMGMK14814   | <i>Anthophora</i> | <i>Anthophora furcata</i>      |
| HDBNS07703   | <i>Anthophora</i> | <i>Anthophora furcata</i>      |
| JSHYN26611   | <i>Anthophora</i> | <i>Anthophora furcata</i>      |
| SSEIA775313  | <i>Anthophora</i> | <i>Anthophora furcata</i>      |
| SSEIB1291613 | <i>Anthophora</i> | <i>Anthophora furcata</i>      |
| SSEIB1291913 | <i>Anthophora</i> | <i>Anthophora furcata</i>      |
| SSEIB1292213 | <i>Anthophora</i> | <i>Anthophora furcata</i>      |
| SSEIB1292613 | <i>Anthophora</i> | <i>Anthophora furcata</i>      |
| SSEIB1292813 | <i>Anthophora</i> | <i>Anthophora furcata</i>      |
| SSEIB1293013 | <i>Anthophora</i> | <i>Anthophora furcata</i>      |
| SSEIB1293613 | <i>Anthophora</i> | <i>Anthophora furcata</i>      |
| SSEIB1293913 | <i>Anthophora</i> | <i>Anthophora furcata</i>      |
| SSEIB1294213 | <i>Anthophora</i> | <i>Anthophora furcata</i>      |
| SSEIB1295913 | <i>Anthophora</i> | <i>Anthophora furcata</i>      |
| SSEIB1296313 | <i>Anthophora</i> | <i>Anthophora furcata</i>      |
| SSEIB1296613 | <i>Anthophora</i> | <i>Anthophora furcata</i>      |
| SSEIB1338513 | <i>Anthophora</i> | <i>Anthophora furcata</i>      |
| SSPAB964713  | <i>Anthophora</i> | <i>Anthophora furcata</i>      |
| SSPAC03413   | <i>Anthophora</i> | <i>Anthophora furcata</i>      |
| TTHYW23508   | <i>Anthophora</i> | <i>Anthophora furcata</i>      |
| TTHYW23608   | <i>Anthophora</i> | <i>Anthophora furcata</i>      |
| TTHYW23808   | <i>Anthophora</i> | <i>Anthophora furcata</i>      |
| TTHYW43808   | <i>Anthophora</i> | <i>Anthophora furcata</i>      |
| TTHYW63008   | <i>Anthophora</i> | <i>Anthophora furcata</i>      |
| GBAH1821719  | <i>Anthophora</i> | <i>Anthophora hololeuca</i>    |
| GBAH1821819  | <i>Anthophora</i> | <i>Anthophora maculifrons</i>  |
| BEECC102109  | <i>Anthophora</i> | <i>Anthophora montana</i>      |
| BEECC102209  | <i>Anthophora</i> | <i>Anthophora montana</i>      |
| GBAH1821919  | <i>Anthophora</i> | <i>Anthophora mortuaria</i>    |
| BEECB77407   | <i>Anthophora</i> | <i>Anthophora occidentalis</i> |
| BEECC101709  | <i>Anthophora</i> | <i>Anthophora occidentalis</i> |
| BEECC101809  | <i>Anthophora</i> | <i>Anthophora occidentalis</i> |
| BEECC101909  | <i>Anthophora</i> | <i>Anthophora occidentalis</i> |
| GBAH1822019  | <i>Anthophora</i> | <i>Anthophora pachyodonta</i>  |
| BEECC100009  | <i>Anthophora</i> | <i>Anthophora pacifica</i>     |
| GBAH1822119  | <i>Anthophora</i> | <i>Anthophora petrophila</i>   |
| GBAH1822219  | <i>Anthophora</i> | <i>Anthophora phenax</i>       |
| BCHYM46213   | <i>Anthophora</i> | <i>Anthophora plagiata</i>     |

|              |                   |                             |
|--------------|-------------------|-----------------------------|
| BCHYM46313   | <i>Anthophora</i> | <i>Anthophora plagiata</i>  |
| BCHYM46413   | <i>Anthophora</i> | <i>Anthophora plagiata</i>  |
| BCHYM46513   | <i>Anthophora</i> | <i>Anthophora plagiata</i>  |
| BCHYM46613   | <i>Anthophora</i> | <i>Anthophora plagiata</i>  |
| BCHYM46713   | <i>Anthophora</i> | <i>Anthophora plagiata</i>  |
| FBAPB43209   | <i>Anthophora</i> | <i>Anthophora plagiata</i>  |
| FBAPB43309   | <i>Anthophora</i> | <i>Anthophora plagiata</i>  |
| BCHYM151813  | <i>Anthophora</i> | <i>Anthophora plumipes</i>  |
| BCHYM151913  | <i>Anthophora</i> | <i>Anthophora plumipes</i>  |
| BEEEE02315   | <i>Anthophora</i> | <i>Anthophora plumipes</i>  |
| BEEEE02415   | <i>Anthophora</i> | <i>Anthophora plumipes</i>  |
| FBAPD09811   | <i>Anthophora</i> | <i>Anthophora plumipes</i>  |
| FBAPD09911   | <i>Anthophora</i> | <i>Anthophora plumipes</i>  |
| FBAPD40811   | <i>Anthophora</i> | <i>Anthophora plumipes</i>  |
| FBHAP17409   | <i>Anthophora</i> | <i>Anthophora plumipes</i>  |
| FBHAP39409   | <i>Anthophora</i> | <i>Anthophora plumipes</i>  |
| FBHAP39509   | <i>Anthophora</i> | <i>Anthophora plumipes</i>  |
| FBHAP39609   | <i>Anthophora</i> | <i>Anthophora plumipes</i>  |
| FBHAP39709   | <i>Anthophora</i> | <i>Anthophora plumipes</i>  |
| GBACU154212  | <i>Anthophora</i> | <i>Anthophora plumipes</i>  |
| GBACU240913  | <i>Anthophora</i> | <i>Anthophora plumipes</i>  |
| GBAH1616119  | <i>Anthophora</i> | <i>Anthophora plumipes</i>  |
| GBAH1647919  | <i>Anthophora</i> | <i>Anthophora plumipes</i>  |
| GBAH1649619  | <i>Anthophora</i> | <i>Anthophora plumipes</i>  |
| GBAH1822319  | <i>Anthophora</i> | <i>Anthophora plumipes</i>  |
| GBAH1822419  | <i>Anthophora</i> | <i>Anthophora plumipes</i>  |
| GBAH1822519  | <i>Anthophora</i> | <i>Anthophora plumipes</i>  |
| GBLGC02212   | <i>Anthophora</i> | <i>Anthophora plumipes</i>  |
| GBMIN7164317 | <i>Anthophora</i> | <i>Anthophora plumipes</i>  |
| GBMIN7164417 | <i>Anthophora</i> | <i>Anthophora plumipes</i>  |
| GBMIN7164517 | <i>Anthophora</i> | <i>Anthophora plumipes</i>  |
| POLLE185519  | <i>Anthophora</i> | <i>Anthophora plumipes</i>  |
| POLLE185919  | <i>Anthophora</i> | <i>Anthophora plumipes</i>  |
| POLLE187219  | <i>Anthophora</i> | <i>Anthophora plumipes</i>  |
| POLLE187419  | <i>Anthophora</i> | <i>Anthophora plumipes</i>  |
| POLLE187819  | <i>Anthophora</i> | <i>Anthophora plumipes</i>  |
| POLLE205919  | <i>Anthophora</i> | <i>Anthophora plumipes</i>  |
| POLLE206019  | <i>Anthophora</i> | <i>Anthophora plumipes</i>  |
| POLLE213219  | <i>Anthophora</i> | <i>Anthophora plumipes</i>  |
| POLLE213419  | <i>Anthophora</i> | <i>Anthophora plumipes</i>  |
| POLLE284119  | <i>Anthophora</i> | <i>Anthophora plumipes</i>  |
| BBHYG67510   | <i>Anthophora</i> | <i>Anthophora porterae</i>  |
| BEECC101409  | <i>Anthophora</i> | <i>Anthophora porterae</i>  |
| GBAH1822619  | <i>Anthophora</i> | <i>Anthophora porterae</i>  |
| BCHYM45613   | <i>Anthophora</i> | <i>Anthophora pubescens</i> |
| BCHYM45713   | <i>Anthophora</i> | <i>Anthophora pubescens</i> |

|              |                   |                                  |
|--------------|-------------------|----------------------------------|
| BCHYM45813   | <i>Anthophora</i> | <i>Anthophora pubescens</i>      |
| BCHYM45913   | <i>Anthophora</i> | <i>Anthophora pubescens</i>      |
| FBAPB43509   | <i>Anthophora</i> | <i>Anthophora pubescens</i>      |
| FBAPB43609   | <i>Anthophora</i> | <i>Anthophora pubescens</i>      |
| FBAPC17310   | <i>Anthophora</i> | <i>Anthophora pubescens</i>      |
| FBAPC17410   | <i>Anthophora</i> | <i>Anthophora pubescens</i>      |
| FBAPC17510   | <i>Anthophora</i> | <i>Anthophora pubescens</i>      |
| GBACU209413  | <i>Anthophora</i> | <i>Anthophora pubescens</i>      |
| GBACU209513  | <i>Anthophora</i> | <i>Anthophora pubescens</i>      |
| GBACU209613  | <i>Anthophora</i> | <i>Anthophora pubescens</i>      |
| GBACU209713  | <i>Anthophora</i> | <i>Anthophora pubescens</i>      |
| GBACU209813  | <i>Anthophora</i> | <i>Anthophora pubescens</i>      |
| GBMIN7164617 | <i>Anthophora</i> | <i>Anthophora pubescens</i>      |
| BEEEE15515   | <i>Anthophora</i> | <i>Anthophora quadrimaculata</i> |
| FBAPB43909   | <i>Anthophora</i> | <i>Anthophora quadrimaculata</i> |
| FBAPC48311   | <i>Anthophora</i> | <i>Anthophora quadrimaculata</i> |
| FBAPC48411   | <i>Anthophora</i> | <i>Anthophora quadrimaculata</i> |
| FBAPD57611   | <i>Anthophora</i> | <i>Anthophora quadrimaculata</i> |
| FBAPD57711   | <i>Anthophora</i> | <i>Anthophora quadrimaculata</i> |
| FBAPD57811   | <i>Anthophora</i> | <i>Anthophora quadrimaculata</i> |
| FBAPD57911   | <i>Anthophora</i> | <i>Anthophora quadrimaculata</i> |
| GBAH1822719  | <i>Anthophora</i> | <i>Anthophora quadrimaculata</i> |
| FBAPB44409   | <i>Anthophora</i> | <i>Anthophora retusa</i>         |
| FBAPD58011   | <i>Anthophora</i> | <i>Anthophora retusa</i>         |
| FBAPD58111   | <i>Anthophora</i> | <i>Anthophora retusa</i>         |
| GBACU240413  | <i>Anthophora</i> | <i>Anthophora retusa</i>         |
| GBLGC02612   | <i>Anthophora</i> | <i>Anthophora retusa</i>         |
| GBLGC02712   | <i>Anthophora</i> | <i>Anthophora retusa</i>         |
| GBLGC02812   | <i>Anthophora</i> | <i>Anthophora retusa</i>         |
| GBLGC02912   | <i>Anthophora</i> | <i>Anthophora retusa</i>         |
| SDBEE04212   | <i>Anthophora</i> | <i>Anthophora squammulosa</i>    |
| SDBEE04312   | <i>Anthophora</i> | <i>Anthophora squammulosa</i>    |
| GBAH1822819  | <i>Anthophora</i> | <i>Anthophora striata</i>        |
| BEECB54907   | <i>Anthophora</i> | <i>Anthophora terminalis</i>     |
| BEECB85507   | <i>Anthophora</i> | <i>Anthophora terminalis</i>     |
| BEECC80809   | <i>Anthophora</i> | <i>Anthophora terminalis</i>     |
| BEECC80909   | <i>Anthophora</i> | <i>Anthophora terminalis</i>     |
| BEECC81009   | <i>Anthophora</i> | <i>Anthophora terminalis</i>     |
| BEECC81109   | <i>Anthophora</i> | <i>Anthophora terminalis</i>     |
| BEECC81209   | <i>Anthophora</i> | <i>Anthophora terminalis</i>     |
| DIAL15606    | <i>Anthophora</i> | <i>Anthophora terminalis</i>     |
| GBAH1822919  | <i>Anthophora</i> | <i>Anthophora terminalis</i>     |
| INRMA374620  | <i>Anthophora</i> | <i>Anthophora terminalis</i>     |
| GBAH1823019  | <i>Anthophora</i> | <i>Anthophora timberlakei</i>    |
| BEECC100209  | <i>Anthophora</i> | <i>Anthophora urbana</i>         |
| BBHYG67410   | <i>Anthophora</i> | <i>Anthophora ursina</i>         |



|              |                     |                                 |
|--------------|---------------------|---------------------------------|
| BBHYG67610   | <i>Anthophora</i>   | <i>Anthophora ursina</i>        |
| BEECC101009  | <i>Anthophora</i>   | <i>Anthophora ursina</i>        |
| BEECC101109  | <i>Anthophora</i>   | <i>Anthophora ursina</i>        |
| BEECC101209  | <i>Anthophora</i>   | <i>Anthophora ursina</i>        |
| GBAH1823119  | <i>Anthophora</i>   | <i>Anthophora vallorum</i>      |
| ETKB21913    | <i>Anthophora</i>   | <i>Anthophora vestita</i>       |
| ETKB26913    | <i>Anthophora</i>   | <i>Anthophora vestita</i>       |
| ETKB27113    | <i>Anthophora</i>   | <i>Anthophora vestita</i>       |
| ETKB28413    | <i>Anthophora</i>   | <i>Anthophora vestita</i>       |
| GBAH1823219  | <i>Anthophora</i>   | <i>Anthophora wartmanni</i>     |
| BBHYA132612  | <i>Anthophorula</i> | <i>Anthophorula compactula</i>  |
| PIMA13519    | <i>Anthophorula</i> | <i>Anthophorula compactula</i>  |
| GBMNB6192120 | <i>Anthophorula</i> | <i>Anthophorula completa</i>    |
| SICOB69718   | <i>Anthophorula</i> | <i>Anthophorula micheneri</i>   |
| BEECC21108   | <i>Anthophorula</i> | <i>Anthophorula rufiventris</i> |
| GBMNB6249220 | <i>Anthophorula</i> | <i>Anthophorula truncata</i>    |
| GBAH1668819  | <i>Apis</i>         | <i>Apis andreniformis</i>       |
| GBAH1677519  | <i>Apis</i>         | <i>Apis andreniformis</i>       |
| GBAH1677619  | <i>Apis</i>         | <i>Apis andreniformis</i>       |
| GBAH178206   | <i>Apis</i>         | <i>Apis andreniformis</i>       |
| GBAH178306   | <i>Apis</i>         | <i>Apis andreniformis</i>       |
| GBAH1823319  | <i>Apis</i>         | <i>Apis andreniformis</i>       |
| GBAH227807   | <i>Apis</i>         | <i>Apis andreniformis</i>       |
| GBAH227907   | <i>Apis</i>         | <i>Apis andreniformis</i>       |
| GBAH228007   | <i>Apis</i>         | <i>Apis andreniformis</i>       |
| GBAH228107   | <i>Apis</i>         | <i>Apis andreniformis</i>       |
| GBAH228207   | <i>Apis</i>         | <i>Apis andreniformis</i>       |
| GBAH228307   | <i>Apis</i>         | <i>Apis andreniformis</i>       |
| GBAH517109   | <i>Apis</i>         | <i>Apis andreniformis</i>       |
| GBAH517209   | <i>Apis</i>         | <i>Apis andreniformis</i>       |
| GBAH617109   | <i>Apis</i>         | <i>Apis andreniformis</i>       |
| GBHAP87514   | <i>Apis</i>         | <i>Apis andreniformis</i>       |
| GBMIN7165317 | <i>Apis</i>         | <i>Apis andreniformis</i>       |
| GBMNA1900119 | <i>Apis</i>         | <i>Apis andreniformis</i>       |
| GBMNA3659619 | <i>Apis</i>         | <i>Apis andreniformis</i>       |
| SABEE41915   | <i>Apis</i>         | <i>Apis andreniformis</i>       |
| SABEE42015   | <i>Apis</i>         | <i>Apis andreniformis</i>       |
| SABEE42115   | <i>Apis</i>         | <i>Apis andreniformis</i>       |
| SABEE42215   | <i>Apis</i>         | <i>Apis andreniformis</i>       |
| SABEE42315   | <i>Apis</i>         | <i>Apis andreniformis</i>       |
| SABEE42415   | <i>Apis</i>         | <i>Apis andreniformis</i>       |
| SABEE42515   | <i>Apis</i>         | <i>Apis andreniformis</i>       |
| SABEE42615   | <i>Apis</i>         | <i>Apis andreniformis</i>       |
| SABEE42715   | <i>Apis</i>         | <i>Apis andreniformis</i>       |
| SABEE42815   | <i>Apis</i>         | <i>Apis andreniformis</i>       |
| SABEE42915   | <i>Apis</i>         | <i>Apis andreniformis</i>       |

|            |             |                           |
|------------|-------------|---------------------------|
| SABEE43015 | <i>Apis</i> | <i>Apis andreniformis</i> |
| SABEE45815 | <i>Apis</i> | <i>Apis andreniformis</i> |
| SABEE45915 | <i>Apis</i> | <i>Apis andreniformis</i> |
| SABEE46015 | <i>Apis</i> | <i>Apis andreniformis</i> |
| SABEE46115 | <i>Apis</i> | <i>Apis andreniformis</i> |
| SABEE46215 | <i>Apis</i> | <i>Apis andreniformis</i> |
| SABEE46315 | <i>Apis</i> | <i>Apis andreniformis</i> |
| SABEE46415 | <i>Apis</i> | <i>Apis andreniformis</i> |
| SABEE46515 | <i>Apis</i> | <i>Apis andreniformis</i> |
| SABEE46615 | <i>Apis</i> | <i>Apis andreniformis</i> |
| SABEE46715 | <i>Apis</i> | <i>Apis andreniformis</i> |
| SABEE46815 | <i>Apis</i> | <i>Apis andreniformis</i> |
| SABEE46915 | <i>Apis</i> | <i>Apis andreniformis</i> |
| SABEE47015 | <i>Apis</i> | <i>Apis andreniformis</i> |
| SABEE47115 | <i>Apis</i> | <i>Apis andreniformis</i> |
| SABEE48015 | <i>Apis</i> | <i>Apis andreniformis</i> |
| SABEE48215 | <i>Apis</i> | <i>Apis andreniformis</i> |
| SABEE49115 | <i>Apis</i> | <i>Apis andreniformis</i> |
| SABEE49315 | <i>Apis</i> | <i>Apis andreniformis</i> |
| SABEE49415 | <i>Apis</i> | <i>Apis andreniformis</i> |
| SABEE49515 | <i>Apis</i> | <i>Apis andreniformis</i> |
| SABEE49615 | <i>Apis</i> | <i>Apis andreniformis</i> |
| SABEE55715 | <i>Apis</i> | <i>Apis andreniformis</i> |
| AGIRI28417 | <i>Apis</i> | <i>Apis cerana</i>        |
| DOBEE15915 | <i>Apis</i> | <i>Apis cerana</i>        |
| DOBEE16015 | <i>Apis</i> | <i>Apis cerana</i>        |
| DOBEE16115 | <i>Apis</i> | <i>Apis cerana</i>        |
| DOBEE16215 | <i>Apis</i> | <i>Apis cerana</i>        |
| DOBEE16315 | <i>Apis</i> | <i>Apis cerana</i>        |
| DOBEE16415 | <i>Apis</i> | <i>Apis cerana</i>        |
| DOBEE16515 | <i>Apis</i> | <i>Apis cerana</i>        |
| DOBEE16615 | <i>Apis</i> | <i>Apis cerana</i>        |
| DOBEE16815 | <i>Apis</i> | <i>Apis cerana</i>        |
| DOBEE16915 | <i>Apis</i> | <i>Apis cerana</i>        |
| DOBEE17015 | <i>Apis</i> | <i>Apis cerana</i>        |
| DOBEE17115 | <i>Apis</i> | <i>Apis cerana</i>        |
| DOBEE17215 | <i>Apis</i> | <i>Apis cerana</i>        |
| DOBEE17315 | <i>Apis</i> | <i>Apis cerana</i>        |
| DOBEE17515 | <i>Apis</i> | <i>Apis cerana</i>        |
| DOBEE17615 | <i>Apis</i> | <i>Apis cerana</i>        |
| DOBEE17815 | <i>Apis</i> | <i>Apis cerana</i>        |
| DOBEE18815 | <i>Apis</i> | <i>Apis cerana</i>        |
| DOBEE18915 | <i>Apis</i> | <i>Apis cerana</i>        |
| DOBEE19015 | <i>Apis</i> | <i>Apis cerana</i>        |
| DOBEE19115 | <i>Apis</i> | <i>Apis cerana</i>        |
| DOBEE19215 | <i>Apis</i> | <i>Apis cerana</i>        |

|            |             |                    |
|------------|-------------|--------------------|
| DOBEE19315 | <i>Apis</i> | <i>Apis cerana</i> |
| DOBEE19415 | <i>Apis</i> | <i>Apis cerana</i> |
| DOBEE19515 | <i>Apis</i> | <i>Apis cerana</i> |
| DOBEE19615 | <i>Apis</i> | <i>Apis cerana</i> |
| DOBEE19715 | <i>Apis</i> | <i>Apis cerana</i> |
| DOBEE19915 | <i>Apis</i> | <i>Apis cerana</i> |
| DOBEE20015 | <i>Apis</i> | <i>Apis cerana</i> |
| DOBEE20315 | <i>Apis</i> | <i>Apis cerana</i> |
| DOBEE20415 | <i>Apis</i> | <i>Apis cerana</i> |
| DOBEE20515 | <i>Apis</i> | <i>Apis cerana</i> |
| DOBEE20615 | <i>Apis</i> | <i>Apis cerana</i> |
| DOBEE20715 | <i>Apis</i> | <i>Apis cerana</i> |
| DOBEE20815 | <i>Apis</i> | <i>Apis cerana</i> |
| DOBEE21015 | <i>Apis</i> | <i>Apis cerana</i> |
| DOBEE21515 | <i>Apis</i> | <i>Apis cerana</i> |
| DOBEE21615 | <i>Apis</i> | <i>Apis cerana</i> |
| DOBEE22115 | <i>Apis</i> | <i>Apis cerana</i> |
| DOBEE22215 | <i>Apis</i> | <i>Apis cerana</i> |
| DOBEE22315 | <i>Apis</i> | <i>Apis cerana</i> |
| DOBEE22415 | <i>Apis</i> | <i>Apis cerana</i> |
| DOBEE22515 | <i>Apis</i> | <i>Apis cerana</i> |
| DOBEE22615 | <i>Apis</i> | <i>Apis cerana</i> |
| DOBEE23215 | <i>Apis</i> | <i>Apis cerana</i> |
| DOBEE23315 | <i>Apis</i> | <i>Apis cerana</i> |
| DOBEE26115 | <i>Apis</i> | <i>Apis cerana</i> |
| DOBEE28615 | <i>Apis</i> | <i>Apis cerana</i> |
| DOBEE30615 | <i>Apis</i> | <i>Apis cerana</i> |
| DOBEE31215 | <i>Apis</i> | <i>Apis cerana</i> |
| DOBEE31415 | <i>Apis</i> | <i>Apis cerana</i> |
| DOBEE31515 | <i>Apis</i> | <i>Apis cerana</i> |
| DOBEE31615 | <i>Apis</i> | <i>Apis cerana</i> |
| DOBEE46715 | <i>Apis</i> | <i>Apis cerana</i> |
| DOBEE46915 | <i>Apis</i> | <i>Apis cerana</i> |
| DOBEE47015 | <i>Apis</i> | <i>Apis cerana</i> |
| DOBEE47115 | <i>Apis</i> | <i>Apis cerana</i> |
| DOBEE47415 | <i>Apis</i> | <i>Apis cerana</i> |
| DOBEE47515 | <i>Apis</i> | <i>Apis cerana</i> |
| DOBEE47715 | <i>Apis</i> | <i>Apis cerana</i> |
| DOBEE47815 | <i>Apis</i> | <i>Apis cerana</i> |
| DOBEE47915 | <i>Apis</i> | <i>Apis cerana</i> |
| DOBEE48015 | <i>Apis</i> | <i>Apis cerana</i> |
| DOBEE48115 | <i>Apis</i> | <i>Apis cerana</i> |
| DOBEE48215 | <i>Apis</i> | <i>Apis cerana</i> |
| DOBEE48315 | <i>Apis</i> | <i>Apis cerana</i> |
| DOBEE48415 | <i>Apis</i> | <i>Apis cerana</i> |
| DOBEE48515 | <i>Apis</i> | <i>Apis cerana</i> |

|            |             |                    |
|------------|-------------|--------------------|
| DOBEE48615 | <i>Apis</i> | <i>Apis cerana</i> |
| DOBEE48715 | <i>Apis</i> | <i>Apis cerana</i> |
| DOBEE48915 | <i>Apis</i> | <i>Apis cerana</i> |
| DOBEE49015 | <i>Apis</i> | <i>Apis cerana</i> |
| DOBEE49115 | <i>Apis</i> | <i>Apis cerana</i> |
| DOBEE49215 | <i>Apis</i> | <i>Apis cerana</i> |
| DOBEE49315 | <i>Apis</i> | <i>Apis cerana</i> |
| DOBEE49415 | <i>Apis</i> | <i>Apis cerana</i> |
| DOBEE49515 | <i>Apis</i> | <i>Apis cerana</i> |
| DOBEE49615 | <i>Apis</i> | <i>Apis cerana</i> |
| DOBEE49715 | <i>Apis</i> | <i>Apis cerana</i> |
| DOBEE49815 | <i>Apis</i> | <i>Apis cerana</i> |
| DOBEE49915 | <i>Apis</i> | <i>Apis cerana</i> |
| DOBEE50015 | <i>Apis</i> | <i>Apis cerana</i> |
| DOBEE50115 | <i>Apis</i> | <i>Apis cerana</i> |
| DOBEE50215 | <i>Apis</i> | <i>Apis cerana</i> |
| DOBEE50415 | <i>Apis</i> | <i>Apis cerana</i> |
| DOBEE50515 | <i>Apis</i> | <i>Apis cerana</i> |
| DOBEE50815 | <i>Apis</i> | <i>Apis cerana</i> |
| DOBEE50915 | <i>Apis</i> | <i>Apis cerana</i> |
| DOBEE51015 | <i>Apis</i> | <i>Apis cerana</i> |
| DOBEE51215 | <i>Apis</i> | <i>Apis cerana</i> |
| DOBEE51315 | <i>Apis</i> | <i>Apis cerana</i> |
| DOBEE51615 | <i>Apis</i> | <i>Apis cerana</i> |
| DOBEE51715 | <i>Apis</i> | <i>Apis cerana</i> |
| DOBEE52715 | <i>Apis</i> | <i>Apis cerana</i> |
| DOBEE52815 | <i>Apis</i> | <i>Apis cerana</i> |
| DOBEE53015 | <i>Apis</i> | <i>Apis cerana</i> |
| DOBEE53215 | <i>Apis</i> | <i>Apis cerana</i> |
| DOBEE53715 | <i>Apis</i> | <i>Apis cerana</i> |
| DOBEE53815 | <i>Apis</i> | <i>Apis cerana</i> |
| DOBEE53915 | <i>Apis</i> | <i>Apis cerana</i> |
| DOBEE54015 | <i>Apis</i> | <i>Apis cerana</i> |
| DOBEE54215 | <i>Apis</i> | <i>Apis cerana</i> |
| DOBEE54315 | <i>Apis</i> | <i>Apis cerana</i> |
| DOBEE54415 | <i>Apis</i> | <i>Apis cerana</i> |
| DOBEE54515 | <i>Apis</i> | <i>Apis cerana</i> |
| DOBEE54615 | <i>Apis</i> | <i>Apis cerana</i> |
| DOBEE54715 | <i>Apis</i> | <i>Apis cerana</i> |
| DOBEE54815 | <i>Apis</i> | <i>Apis cerana</i> |
| DOBEE55315 | <i>Apis</i> | <i>Apis cerana</i> |
| DOBEE55415 | <i>Apis</i> | <i>Apis cerana</i> |
| DOBEE55515 | <i>Apis</i> | <i>Apis cerana</i> |
| DOBEE55615 | <i>Apis</i> | <i>Apis cerana</i> |
| DOBEE55715 | <i>Apis</i> | <i>Apis cerana</i> |
| DOBEE55815 | <i>Apis</i> | <i>Apis cerana</i> |

|             |             |                    |                       |
|-------------|-------------|--------------------|-----------------------|
| DOBEE60915  | <i>Apis</i> | <i>Apis cerana</i> |                       |
| GBAH027306  | <i>Apis</i> | <i>Apis cerana</i> | <i>Apis nuluensis</i> |
| GBAH027406  | <i>Apis</i> | <i>Apis cerana</i> | <i>Apis nuluensis</i> |
| GBAH027506  | <i>Apis</i> | <i>Apis cerana</i> |                       |
| GBAH027606  | <i>Apis</i> | <i>Apis cerana</i> |                       |
| GBAH027706  | <i>Apis</i> | <i>Apis cerana</i> |                       |
| GBAH027806  | <i>Apis</i> | <i>Apis cerana</i> |                       |
| GBAH027906  | <i>Apis</i> | <i>Apis cerana</i> |                       |
| GBAH028006  | <i>Apis</i> | <i>Apis cerana</i> |                       |
| GBAH028106  | <i>Apis</i> | <i>Apis cerana</i> |                       |
| GBAH028206  | <i>Apis</i> | <i>Apis cerana</i> |                       |
| GBAH028306  | <i>Apis</i> | <i>Apis cerana</i> |                       |
| GBAH029806  | <i>Apis</i> | <i>Apis cerana</i> |                       |
| GBAH061006  | <i>Apis</i> | <i>Apis cerana</i> |                       |
| GBAH090806  | <i>Apis</i> | <i>Apis cerana</i> |                       |
| GBAH1308419 | <i>Apis</i> | <i>Apis cerana</i> |                       |
| GBAH1308519 | <i>Apis</i> | <i>Apis cerana</i> |                       |
| GBAH1308619 | <i>Apis</i> | <i>Apis cerana</i> |                       |
| GBAH1308719 | <i>Apis</i> | <i>Apis cerana</i> |                       |
| GBAH1308819 | <i>Apis</i> | <i>Apis cerana</i> |                       |
| GBAH1642719 | <i>Apis</i> | <i>Apis cerana</i> |                       |
| GBAH1642819 | <i>Apis</i> | <i>Apis cerana</i> |                       |
| GBAH1642919 | <i>Apis</i> | <i>Apis cerana</i> |                       |
| GBAH1643019 | <i>Apis</i> | <i>Apis cerana</i> |                       |
| GBAH1643119 | <i>Apis</i> | <i>Apis cerana</i> |                       |
| GBAH1643219 | <i>Apis</i> | <i>Apis cerana</i> |                       |
| GBAH1650119 | <i>Apis</i> | <i>Apis cerana</i> |                       |
| GBAH1655519 | <i>Apis</i> | <i>Apis cerana</i> |                       |
| GBAH1676219 | <i>Apis</i> | <i>Apis cerana</i> |                       |
| GBAH1702419 | <i>Apis</i> | <i>Apis cerana</i> |                       |
| GBAH1702519 | <i>Apis</i> | <i>Apis cerana</i> |                       |
| GBAH1702619 | <i>Apis</i> | <i>Apis cerana</i> |                       |
| GBAH1702719 | <i>Apis</i> | <i>Apis cerana</i> |                       |
| GBAH1702819 | <i>Apis</i> | <i>Apis cerana</i> |                       |
| GBAH1702919 | <i>Apis</i> | <i>Apis cerana</i> |                       |
| GBAH1703019 | <i>Apis</i> | <i>Apis cerana</i> |                       |
| GBAH1703119 | <i>Apis</i> | <i>Apis cerana</i> |                       |
| GBAH1703219 | <i>Apis</i> | <i>Apis cerana</i> |                       |
| GBAH1703319 | <i>Apis</i> | <i>Apis cerana</i> |                       |
| GBAH1703419 | <i>Apis</i> | <i>Apis cerana</i> |                       |
| GBAH1703519 | <i>Apis</i> | <i>Apis cerana</i> |                       |
| GBAH1703619 | <i>Apis</i> | <i>Apis cerana</i> |                       |
| GBAH1703719 | <i>Apis</i> | <i>Apis cerana</i> |                       |
| GBAH1703819 | <i>Apis</i> | <i>Apis cerana</i> |                       |
| GBAH1703919 | <i>Apis</i> | <i>Apis cerana</i> |                       |
| GBAH1704019 | <i>Apis</i> | <i>Apis cerana</i> |                       |

|             |             |                    |
|-------------|-------------|--------------------|
| GBAH1704119 | <i>Apis</i> | <i>Apis cerana</i> |
| GBAH1704219 | <i>Apis</i> | <i>Apis cerana</i> |
| GBAH1704319 | <i>Apis</i> | <i>Apis cerana</i> |
| GBAH1704419 | <i>Apis</i> | <i>Apis cerana</i> |
| GBAH1704519 | <i>Apis</i> | <i>Apis cerana</i> |
| GBAH1704619 | <i>Apis</i> | <i>Apis cerana</i> |
| GBAH1704719 | <i>Apis</i> | <i>Apis cerana</i> |
| GBAH1704819 | <i>Apis</i> | <i>Apis cerana</i> |
| GBAH1704919 | <i>Apis</i> | <i>Apis cerana</i> |
| GBAH1705019 | <i>Apis</i> | <i>Apis cerana</i> |
| GBAH1705119 | <i>Apis</i> | <i>Apis cerana</i> |
| GBAH1705219 | <i>Apis</i> | <i>Apis cerana</i> |
| GBAH1705319 | <i>Apis</i> | <i>Apis cerana</i> |
| GBAH1705419 | <i>Apis</i> | <i>Apis cerana</i> |
| GBAH1705519 | <i>Apis</i> | <i>Apis cerana</i> |
| GBAH1705619 | <i>Apis</i> | <i>Apis cerana</i> |
| GBAH1705719 | <i>Apis</i> | <i>Apis cerana</i> |
| GBAH1705819 | <i>Apis</i> | <i>Apis cerana</i> |
| GBAH1705919 | <i>Apis</i> | <i>Apis cerana</i> |
| GBAH1706019 | <i>Apis</i> | <i>Apis cerana</i> |
| GBAH1706119 | <i>Apis</i> | <i>Apis cerana</i> |
| GBAH1706219 | <i>Apis</i> | <i>Apis cerana</i> |
| GBAH1706319 | <i>Apis</i> | <i>Apis cerana</i> |
| GBAH1706419 | <i>Apis</i> | <i>Apis cerana</i> |
| GBAH1706519 | <i>Apis</i> | <i>Apis cerana</i> |
| GBAH1706619 | <i>Apis</i> | <i>Apis cerana</i> |
| GBAH1706719 | <i>Apis</i> | <i>Apis cerana</i> |
| GBAH1706819 | <i>Apis</i> | <i>Apis cerana</i> |
| GBAH1706919 | <i>Apis</i> | <i>Apis cerana</i> |
| GBAH1707019 | <i>Apis</i> | <i>Apis cerana</i> |
| GBAH1707119 | <i>Apis</i> | <i>Apis cerana</i> |
| GBAH1707219 | <i>Apis</i> | <i>Apis cerana</i> |
| GBAH1707319 | <i>Apis</i> | <i>Apis cerana</i> |
| GBAH1707419 | <i>Apis</i> | <i>Apis cerana</i> |
| GBAH1707519 | <i>Apis</i> | <i>Apis cerana</i> |
| GBAH1707619 | <i>Apis</i> | <i>Apis cerana</i> |
| GBAH1707719 | <i>Apis</i> | <i>Apis cerana</i> |
| GBAH1707819 | <i>Apis</i> | <i>Apis cerana</i> |
| GBAH1707919 | <i>Apis</i> | <i>Apis cerana</i> |
| GBAH1708019 | <i>Apis</i> | <i>Apis cerana</i> |
| GBAH1708119 | <i>Apis</i> | <i>Apis cerana</i> |
| GBAH1708219 | <i>Apis</i> | <i>Apis cerana</i> |
| GBAH1708319 | <i>Apis</i> | <i>Apis cerana</i> |
| GBAH1708419 | <i>Apis</i> | <i>Apis cerana</i> |
| GBAH1708519 | <i>Apis</i> | <i>Apis cerana</i> |
| GBAH1708619 | <i>Apis</i> | <i>Apis cerana</i> |

|             |             |                    |                       |
|-------------|-------------|--------------------|-----------------------|
| GBAH177206  | <i>Apis</i> | <i>Apis cerana</i> |                       |
| GBAH178506  | <i>Apis</i> | <i>Apis cerana</i> |                       |
| GBAH178606  | <i>Apis</i> | <i>Apis cerana</i> |                       |
| GBAH178706  | <i>Apis</i> | <i>Apis cerana</i> |                       |
| GBAH178806  | <i>Apis</i> | <i>Apis cerana</i> |                       |
| GBAH178906  | <i>Apis</i> | <i>Apis cerana</i> |                       |
| GBAH179006  | <i>Apis</i> | <i>Apis cerana</i> |                       |
| GBAH179106  | <i>Apis</i> | <i>Apis cerana</i> |                       |
| GBAH179206  | <i>Apis</i> | <i>Apis cerana</i> |                       |
| GBAH179306  | <i>Apis</i> | <i>Apis cerana</i> |                       |
| GBAH179406  | <i>Apis</i> | <i>Apis cerana</i> |                       |
| GBAH179506  | <i>Apis</i> | <i>Apis cerana</i> |                       |
| GBAH179606  | <i>Apis</i> | <i>Apis cerana</i> |                       |
| GBAH179706  | <i>Apis</i> | <i>Apis cerana</i> |                       |
| GBAH1823419 | <i>Apis</i> | <i>Apis cerana</i> |                       |
| GBAH1823519 | <i>Apis</i> | <i>Apis cerana</i> |                       |
| GBAH1825519 | <i>Apis</i> | <i>Apis cerana</i> | <i>Apis nuluensis</i> |
| GBAH249907  | <i>Apis</i> | <i>Apis cerana</i> |                       |
| GBAH250107  | <i>Apis</i> | <i>Apis cerana</i> |                       |
| GBAH250207  | <i>Apis</i> | <i>Apis cerana</i> |                       |
| GBAH250307  | <i>Apis</i> | <i>Apis cerana</i> |                       |
| GBAH250407  | <i>Apis</i> | <i>Apis cerana</i> |                       |
| GBAH250507  | <i>Apis</i> | <i>Apis cerana</i> |                       |
| GBAH250607  | <i>Apis</i> | <i>Apis cerana</i> |                       |
| GBAH250707  | <i>Apis</i> | <i>Apis cerana</i> |                       |
| GBAH250807  | <i>Apis</i> | <i>Apis cerana</i> |                       |
| GBAH250907  | <i>Apis</i> | <i>Apis cerana</i> |                       |
| GBAH251007  | <i>Apis</i> | <i>Apis cerana</i> |                       |
| GBAH251107  | <i>Apis</i> | <i>Apis cerana</i> |                       |
| GBAH618609  | <i>Apis</i> | <i>Apis cerana</i> |                       |
| GBAH618809  | <i>Apis</i> | <i>Apis cerana</i> |                       |
| GBHAP136915 | <i>Apis</i> | <i>Apis cerana</i> |                       |
| GBHAP137015 | <i>Apis</i> | <i>Apis cerana</i> |                       |
| GBHAP137115 | <i>Apis</i> | <i>Apis cerana</i> |                       |
| GBHAP137215 | <i>Apis</i> | <i>Apis cerana</i> |                       |
| GBHAP137315 | <i>Apis</i> | <i>Apis cerana</i> |                       |
| GBHAP137415 | <i>Apis</i> | <i>Apis cerana</i> |                       |
| GBHAP137515 | <i>Apis</i> | <i>Apis cerana</i> |                       |
| GBHAP137615 | <i>Apis</i> | <i>Apis cerana</i> |                       |
| GBHAP137715 | <i>Apis</i> | <i>Apis cerana</i> |                       |
| GBHAP137815 | <i>Apis</i> | <i>Apis cerana</i> |                       |
| GBHAP138715 | <i>Apis</i> | <i>Apis cerana</i> |                       |
| GBHAP21613  | <i>Apis</i> | <i>Apis cerana</i> |                       |
| GBHAP29814  | <i>Apis</i> | <i>Apis cerana</i> |                       |
| GBHAP86014  | <i>Apis</i> | <i>Apis cerana</i> |                       |
| GBHAP86114  | <i>Apis</i> | <i>Apis cerana</i> |                       |

|              |             |                    |
|--------------|-------------|--------------------|
| GBHAP86214   | <i>Apis</i> | <i>Apis cerana</i> |
| GBHAP86314   | <i>Apis</i> | <i>Apis cerana</i> |
| GBHAP86414   | <i>Apis</i> | <i>Apis cerana</i> |
| GBHAP86514   | <i>Apis</i> | <i>Apis cerana</i> |
| GBHAP86614   | <i>Apis</i> | <i>Apis cerana</i> |
| GBHAP86714   | <i>Apis</i> | <i>Apis cerana</i> |
| GBHAP86814   | <i>Apis</i> | <i>Apis cerana</i> |
| GBHAP86914   | <i>Apis</i> | <i>Apis cerana</i> |
| GBHAP87014   | <i>Apis</i> | <i>Apis cerana</i> |
| GBHAP87114   | <i>Apis</i> | <i>Apis cerana</i> |
| GBHAP87214   | <i>Apis</i> | <i>Apis cerana</i> |
| GBHAP87314   | <i>Apis</i> | <i>Apis cerana</i> |
| GBHAP87414   | <i>Apis</i> | <i>Apis cerana</i> |
| GBHAP87614   | <i>Apis</i> | <i>Apis cerana</i> |
| GBHAP87714   | <i>Apis</i> | <i>Apis cerana</i> |
| GBHAP87814   | <i>Apis</i> | <i>Apis cerana</i> |
| GBHAP87914   | <i>Apis</i> | <i>Apis cerana</i> |
| GBHAP88014   | <i>Apis</i> | <i>Apis cerana</i> |
| GBHAP88114   | <i>Apis</i> | <i>Apis cerana</i> |
| GBHAP88214   | <i>Apis</i> | <i>Apis cerana</i> |
| GBHAP88314   | <i>Apis</i> | <i>Apis cerana</i> |
| GBHAP88514   | <i>Apis</i> | <i>Apis cerana</i> |
| GBHAP88614   | <i>Apis</i> | <i>Apis cerana</i> |
| GBMIN3397713 | <i>Apis</i> | <i>Apis cerana</i> |
| GBMIN7165417 | <i>Apis</i> | <i>Apis cerana</i> |
| GBMIN7165617 | <i>Apis</i> | <i>Apis cerana</i> |
| GBMIN7165717 | <i>Apis</i> | <i>Apis cerana</i> |
| GBMIN7165817 | <i>Apis</i> | <i>Apis cerana</i> |
| GBMIN7165917 | <i>Apis</i> | <i>Apis cerana</i> |
| GBMIN7166017 | <i>Apis</i> | <i>Apis cerana</i> |
| GBMIN7166217 | <i>Apis</i> | <i>Apis cerana</i> |
| GBMIN7166317 | <i>Apis</i> | <i>Apis cerana</i> |
| GBMIN7166417 | <i>Apis</i> | <i>Apis cerana</i> |
| GBMIN7166617 | <i>Apis</i> | <i>Apis cerana</i> |
| GBMIN7166917 | <i>Apis</i> | <i>Apis cerana</i> |
| GBMIN7167017 | <i>Apis</i> | <i>Apis cerana</i> |
| GBMIN7167117 | <i>Apis</i> | <i>Apis cerana</i> |
| GBMIN7167217 | <i>Apis</i> | <i>Apis cerana</i> |
| GBMIN7167317 | <i>Apis</i> | <i>Apis cerana</i> |
| GBMIN7167417 | <i>Apis</i> | <i>Apis cerana</i> |
| GBMIN7167617 | <i>Apis</i> | <i>Apis cerana</i> |
| GBMIN7167817 | <i>Apis</i> | <i>Apis cerana</i> |
| GBMIN7167917 | <i>Apis</i> | <i>Apis cerana</i> |
| GBMIN7168017 | <i>Apis</i> | <i>Apis cerana</i> |
| GBMIN7168117 | <i>Apis</i> | <i>Apis cerana</i> |
| GBMIN7168417 | <i>Apis</i> | <i>Apis cerana</i> |



|              |             |                    |                       |
|--------------|-------------|--------------------|-----------------------|
| GBMIN7168717 | <i>Apis</i> | <i>Apis cerana</i> |                       |
| GBMIN7168917 | <i>Apis</i> | <i>Apis cerana</i> |                       |
| GBMIN7169317 | <i>Apis</i> | <i>Apis cerana</i> |                       |
| GBMIN7169417 | <i>Apis</i> | <i>Apis cerana</i> |                       |
| GBMIN7169717 | <i>Apis</i> | <i>Apis cerana</i> |                       |
| GBMIN778612  | <i>Apis</i> | <i>Apis cerana</i> |                       |
| GBMNA1775119 | <i>Apis</i> | <i>Apis cerana</i> |                       |
| GBMNA1895619 | <i>Apis</i> | <i>Apis cerana</i> |                       |
| GBMNA1896619 | <i>Apis</i> | <i>Apis cerana</i> |                       |
| GBMNA1896719 | <i>Apis</i> | <i>Apis cerana</i> | <i>Apis nuluensis</i> |
| GBMNA1898919 | <i>Apis</i> | <i>Apis cerana</i> |                       |
| GBMNA3660019 | <i>Apis</i> | <i>Apis cerana</i> |                       |
| GBMNA3852619 | <i>Apis</i> | <i>Apis cerana</i> |                       |
| GBMNA3852719 | <i>Apis</i> | <i>Apis cerana</i> |                       |
| GBMNA3852819 | <i>Apis</i> | <i>Apis cerana</i> |                       |
| GBMNA3852919 | <i>Apis</i> | <i>Apis cerana</i> |                       |
| GBMNA3853019 | <i>Apis</i> | <i>Apis cerana</i> |                       |
| GBMNA3853119 | <i>Apis</i> | <i>Apis cerana</i> |                       |
| GBMNA3853219 | <i>Apis</i> | <i>Apis cerana</i> |                       |
| GBMNA3853319 | <i>Apis</i> | <i>Apis cerana</i> |                       |
| GBMNA3853419 | <i>Apis</i> | <i>Apis cerana</i> |                       |
| GBMNA3853519 | <i>Apis</i> | <i>Apis cerana</i> |                       |
| GBMNA3853619 | <i>Apis</i> | <i>Apis cerana</i> |                       |
| GBMNA3853719 | <i>Apis</i> | <i>Apis cerana</i> |                       |
| GBMNA3853819 | <i>Apis</i> | <i>Apis cerana</i> |                       |
| GBMNA3853919 | <i>Apis</i> | <i>Apis cerana</i> |                       |
| GBMNA3854019 | <i>Apis</i> | <i>Apis cerana</i> |                       |
| GBMNA3854119 | <i>Apis</i> | <i>Apis cerana</i> |                       |
| GBMNA3854219 | <i>Apis</i> | <i>Apis cerana</i> |                       |
| GBMNA3854319 | <i>Apis</i> | <i>Apis cerana</i> |                       |
| GBMNA3854419 | <i>Apis</i> | <i>Apis cerana</i> |                       |
| GBMNA3854519 | <i>Apis</i> | <i>Apis cerana</i> |                       |
| GBMNA3854619 | <i>Apis</i> | <i>Apis cerana</i> |                       |
| GBMNA3854719 | <i>Apis</i> | <i>Apis cerana</i> |                       |
| GBMNA3854819 | <i>Apis</i> | <i>Apis cerana</i> |                       |
| GBMNA3854919 | <i>Apis</i> | <i>Apis cerana</i> |                       |
| GBMNA3855019 | <i>Apis</i> | <i>Apis cerana</i> |                       |
| GBMNA3855119 | <i>Apis</i> | <i>Apis cerana</i> |                       |
| GBMNA996819  | <i>Apis</i> | <i>Apis cerana</i> | <i>Apis nuluensis</i> |
| GBMNB6126420 | <i>Apis</i> | <i>Apis cerana</i> |                       |
| GBMNB6285020 | <i>Apis</i> | <i>Apis cerana</i> |                       |
| GBMNB6285120 | <i>Apis</i> | <i>Apis cerana</i> |                       |
| GBMNB6285220 | <i>Apis</i> | <i>Apis cerana</i> |                       |
| GBMNB6285320 | <i>Apis</i> | <i>Apis cerana</i> |                       |
| GBMNB6285420 | <i>Apis</i> | <i>Apis cerana</i> |                       |
| GBMNB6285520 | <i>Apis</i> | <i>Apis cerana</i> |                       |

|              |             |                    |
|--------------|-------------|--------------------|
| GBMNB6285620 | <i>Apis</i> | <i>Apis cerana</i> |
| GBMNB6285720 | <i>Apis</i> | <i>Apis cerana</i> |
| GBMNB6285820 | <i>Apis</i> | <i>Apis cerana</i> |
| GBMNB6285920 | <i>Apis</i> | <i>Apis cerana</i> |
| GBMTG177716  | <i>Apis</i> | <i>Apis cerana</i> |
| SABEE12615   | <i>Apis</i> | <i>Apis cerana</i> |
| SABEE13015   | <i>Apis</i> | <i>Apis cerana</i> |
| SABEE13115   | <i>Apis</i> | <i>Apis cerana</i> |
| SABEE13215   | <i>Apis</i> | <i>Apis cerana</i> |
| SABEE13415   | <i>Apis</i> | <i>Apis cerana</i> |
| SABEE13515   | <i>Apis</i> | <i>Apis cerana</i> |
| SABEE13615   | <i>Apis</i> | <i>Apis cerana</i> |
| SABEE13715   | <i>Apis</i> | <i>Apis cerana</i> |
| SABEE13815   | <i>Apis</i> | <i>Apis cerana</i> |
| SABEE14015   | <i>Apis</i> | <i>Apis cerana</i> |
| SABEE14215   | <i>Apis</i> | <i>Apis cerana</i> |
| SABEE14515   | <i>Apis</i> | <i>Apis cerana</i> |
| SABEE14615   | <i>Apis</i> | <i>Apis cerana</i> |
| SABEE14815   | <i>Apis</i> | <i>Apis cerana</i> |
| SABEE14915   | <i>Apis</i> | <i>Apis cerana</i> |
| SABEE15115   | <i>Apis</i> | <i>Apis cerana</i> |
| SABEE15215   | <i>Apis</i> | <i>Apis cerana</i> |
| SABEE15315   | <i>Apis</i> | <i>Apis cerana</i> |
| SABEE15615   | <i>Apis</i> | <i>Apis cerana</i> |
| SABEE15715   | <i>Apis</i> | <i>Apis cerana</i> |
| SABEE15815   | <i>Apis</i> | <i>Apis cerana</i> |
| SABEE16015   | <i>Apis</i> | <i>Apis cerana</i> |
| SABEE16115   | <i>Apis</i> | <i>Apis cerana</i> |
| SABEE16215   | <i>Apis</i> | <i>Apis cerana</i> |
| SABEE16315   | <i>Apis</i> | <i>Apis cerana</i> |
| SABEE16415   | <i>Apis</i> | <i>Apis cerana</i> |
| SABEE16515   | <i>Apis</i> | <i>Apis cerana</i> |
| SABEE16615   | <i>Apis</i> | <i>Apis cerana</i> |
| SABEE16715   | <i>Apis</i> | <i>Apis cerana</i> |
| SABEE16815   | <i>Apis</i> | <i>Apis cerana</i> |
| SABEE16915   | <i>Apis</i> | <i>Apis cerana</i> |
| SABEE17015   | <i>Apis</i> | <i>Apis cerana</i> |
| SABEE17115   | <i>Apis</i> | <i>Apis cerana</i> |
| SABEE17215   | <i>Apis</i> | <i>Apis cerana</i> |
| SABEE17315   | <i>Apis</i> | <i>Apis cerana</i> |
| SABEE17415   | <i>Apis</i> | <i>Apis cerana</i> |
| SABEE17515   | <i>Apis</i> | <i>Apis cerana</i> |
| SABEE17615   | <i>Apis</i> | <i>Apis cerana</i> |
| SABEE17715   | <i>Apis</i> | <i>Apis cerana</i> |
| SABEE17815   | <i>Apis</i> | <i>Apis cerana</i> |
| SABEE17915   | <i>Apis</i> | <i>Apis cerana</i> |

|            |             |                    |
|------------|-------------|--------------------|
| SABEE18015 | <i>Apis</i> | <i>Apis cerana</i> |
| SABEE18115 | <i>Apis</i> | <i>Apis cerana</i> |
| SABEE18215 | <i>Apis</i> | <i>Apis cerana</i> |
| SABEE18315 | <i>Apis</i> | <i>Apis cerana</i> |
| SABEE18515 | <i>Apis</i> | <i>Apis cerana</i> |
| SABEE18615 | <i>Apis</i> | <i>Apis cerana</i> |
| SABEE18715 | <i>Apis</i> | <i>Apis cerana</i> |
| SABEE18815 | <i>Apis</i> | <i>Apis cerana</i> |
| SABEE18915 | <i>Apis</i> | <i>Apis cerana</i> |
| SABEE19015 | <i>Apis</i> | <i>Apis cerana</i> |
| SABEE19115 | <i>Apis</i> | <i>Apis cerana</i> |
| SABEE19215 | <i>Apis</i> | <i>Apis cerana</i> |
| SABEE19315 | <i>Apis</i> | <i>Apis cerana</i> |
| SABEE19415 | <i>Apis</i> | <i>Apis cerana</i> |
| SABEE19515 | <i>Apis</i> | <i>Apis cerana</i> |
| SABEE19615 | <i>Apis</i> | <i>Apis cerana</i> |
| SABEE19715 | <i>Apis</i> | <i>Apis cerana</i> |
| SABEE19815 | <i>Apis</i> | <i>Apis cerana</i> |
| SABEE19915 | <i>Apis</i> | <i>Apis cerana</i> |
| SABEE20015 | <i>Apis</i> | <i>Apis cerana</i> |
| SABEE20115 | <i>Apis</i> | <i>Apis cerana</i> |
| SABEE20215 | <i>Apis</i> | <i>Apis cerana</i> |
| SABEE20315 | <i>Apis</i> | <i>Apis cerana</i> |
| SABEE20415 | <i>Apis</i> | <i>Apis cerana</i> |
| SABEE20515 | <i>Apis</i> | <i>Apis cerana</i> |
| SABEE20615 | <i>Apis</i> | <i>Apis cerana</i> |
| SABEE20715 | <i>Apis</i> | <i>Apis cerana</i> |
| SABEE20815 | <i>Apis</i> | <i>Apis cerana</i> |
| SABEE20915 | <i>Apis</i> | <i>Apis cerana</i> |
| SABEE21015 | <i>Apis</i> | <i>Apis cerana</i> |
| SABEE21115 | <i>Apis</i> | <i>Apis cerana</i> |
| SABEE21315 | <i>Apis</i> | <i>Apis cerana</i> |
| SABEE21415 | <i>Apis</i> | <i>Apis cerana</i> |
| SABEE21515 | <i>Apis</i> | <i>Apis cerana</i> |
| SABEE21615 | <i>Apis</i> | <i>Apis cerana</i> |
| SABEE21715 | <i>Apis</i> | <i>Apis cerana</i> |
| SABEE21815 | <i>Apis</i> | <i>Apis cerana</i> |
| SABEE23215 | <i>Apis</i> | <i>Apis cerana</i> |
| SABEE23315 | <i>Apis</i> | <i>Apis cerana</i> |
| SABEE23415 | <i>Apis</i> | <i>Apis cerana</i> |
| SABEE23515 | <i>Apis</i> | <i>Apis cerana</i> |
| SABEE23715 | <i>Apis</i> | <i>Apis cerana</i> |
| SABEE23815 | <i>Apis</i> | <i>Apis cerana</i> |
| SABEE23915 | <i>Apis</i> | <i>Apis cerana</i> |
| SABEE24015 | <i>Apis</i> | <i>Apis cerana</i> |
| SABEE24115 | <i>Apis</i> | <i>Apis cerana</i> |

|            |             |                    |
|------------|-------------|--------------------|
| SABEE24215 | <i>Apis</i> | <i>Apis cerana</i> |
| SABEE24315 | <i>Apis</i> | <i>Apis cerana</i> |
| SABEE24415 | <i>Apis</i> | <i>Apis cerana</i> |
| SABEE24515 | <i>Apis</i> | <i>Apis cerana</i> |
| SABEE24615 | <i>Apis</i> | <i>Apis cerana</i> |
| SABEE25015 | <i>Apis</i> | <i>Apis cerana</i> |
| SABEE25115 | <i>Apis</i> | <i>Apis cerana</i> |
| SABEE26415 | <i>Apis</i> | <i>Apis cerana</i> |
| SABEE26515 | <i>Apis</i> | <i>Apis cerana</i> |
| SABEE26615 | <i>Apis</i> | <i>Apis cerana</i> |
| SABEE26715 | <i>Apis</i> | <i>Apis cerana</i> |
| SABEE26815 | <i>Apis</i> | <i>Apis cerana</i> |
| SABEE26915 | <i>Apis</i> | <i>Apis cerana</i> |
| SABEE27015 | <i>Apis</i> | <i>Apis cerana</i> |
| SABEE27115 | <i>Apis</i> | <i>Apis cerana</i> |
| SABEE27215 | <i>Apis</i> | <i>Apis cerana</i> |
| SABEE27315 | <i>Apis</i> | <i>Apis cerana</i> |
| SABEE27415 | <i>Apis</i> | <i>Apis cerana</i> |
| SABEE27515 | <i>Apis</i> | <i>Apis cerana</i> |
| SABEE27615 | <i>Apis</i> | <i>Apis cerana</i> |
| SABEE27715 | <i>Apis</i> | <i>Apis cerana</i> |
| SABEE27815 | <i>Apis</i> | <i>Apis cerana</i> |
| SABEE27915 | <i>Apis</i> | <i>Apis cerana</i> |
| SABEE28015 | <i>Apis</i> | <i>Apis cerana</i> |
| SABEE28115 | <i>Apis</i> | <i>Apis cerana</i> |
| SABEE28215 | <i>Apis</i> | <i>Apis cerana</i> |
| SABEE28315 | <i>Apis</i> | <i>Apis cerana</i> |
| SABEE28415 | <i>Apis</i> | <i>Apis cerana</i> |
| SABEE28515 | <i>Apis</i> | <i>Apis cerana</i> |
| SABEE28915 | <i>Apis</i> | <i>Apis cerana</i> |
| SABEE31715 | <i>Apis</i> | <i>Apis cerana</i> |
| SABEE70115 | <i>Apis</i> | <i>Apis cerana</i> |
| SABEE70215 | <i>Apis</i> | <i>Apis cerana</i> |
| SABEE70315 | <i>Apis</i> | <i>Apis cerana</i> |
| SABEE70415 | <i>Apis</i> | <i>Apis cerana</i> |
| SABEE70515 | <i>Apis</i> | <i>Apis cerana</i> |
| SABEE70615 | <i>Apis</i> | <i>Apis cerana</i> |
| SABEE70715 | <i>Apis</i> | <i>Apis cerana</i> |
| SABEE70815 | <i>Apis</i> | <i>Apis cerana</i> |
| SABEE70915 | <i>Apis</i> | <i>Apis cerana</i> |
| SABEE71015 | <i>Apis</i> | <i>Apis cerana</i> |
| SABEE71115 | <i>Apis</i> | <i>Apis cerana</i> |
| SABEE71215 | <i>Apis</i> | <i>Apis cerana</i> |
| SABEE71315 | <i>Apis</i> | <i>Apis cerana</i> |
| SABEE71415 | <i>Apis</i> | <i>Apis cerana</i> |
| SABEE71715 | <i>Apis</i> | <i>Apis cerana</i> |

|             |             |                     |
|-------------|-------------|---------------------|
| SABEE71815  | <i>Apis</i> | <i>Apis cerana</i>  |
| SABEE71915  | <i>Apis</i> | <i>Apis cerana</i>  |
| SABEE72215  | <i>Apis</i> | <i>Apis cerana</i>  |
| SABEE72315  | <i>Apis</i> | <i>Apis cerana</i>  |
| SABEE72415  | <i>Apis</i> | <i>Apis cerana</i>  |
| SABEE72515  | <i>Apis</i> | <i>Apis cerana</i>  |
| SABEE72615  | <i>Apis</i> | <i>Apis cerana</i>  |
| SABEE72715  | <i>Apis</i> | <i>Apis cerana</i>  |
| SABEE72815  | <i>Apis</i> | <i>Apis cerana</i>  |
| SABEE72915  | <i>Apis</i> | <i>Apis cerana</i>  |
| SABEE73015  | <i>Apis</i> | <i>Apis cerana</i>  |
| SABEE73115  | <i>Apis</i> | <i>Apis cerana</i>  |
| SABEE73215  | <i>Apis</i> | <i>Apis cerana</i>  |
| SABEE73315  | <i>Apis</i> | <i>Apis cerana</i>  |
| SABEE74815  | <i>Apis</i> | <i>Apis cerana</i>  |
| SABEE75115  | <i>Apis</i> | <i>Apis cerana</i>  |
| SABEE75215  | <i>Apis</i> | <i>Apis cerana</i>  |
| SABEE75315  | <i>Apis</i> | <i>Apis cerana</i>  |
| SABEE75815  | <i>Apis</i> | <i>Apis cerana</i>  |
| SABEE76515  | <i>Apis</i> | <i>Apis cerana</i>  |
| SABEE76615  | <i>Apis</i> | <i>Apis cerana</i>  |
| SABEE77115  | <i>Apis</i> | <i>Apis cerana</i>  |
| SABEE77215  | <i>Apis</i> | <i>Apis cerana</i>  |
| SABEE77315  | <i>Apis</i> | <i>Apis cerana</i>  |
| SABEE78215  | <i>Apis</i> | <i>Apis cerana</i>  |
| SABEE86215  | <i>Apis</i> | <i>Apis cerana</i>  |
| SABEE88015  | <i>Apis</i> | <i>Apis cerana</i>  |
| AGIRI28517  | <i>Apis</i> | <i>Apis dorsata</i> |
| BOFTH43509  | <i>Apis</i> | <i>Apis dorsata</i> |
| DOBEE51815  | <i>Apis</i> | <i>Apis dorsata</i> |
| DOBEE51915  | <i>Apis</i> | <i>Apis dorsata</i> |
| DOBEE52015  | <i>Apis</i> | <i>Apis dorsata</i> |
| DOBEE52115  | <i>Apis</i> | <i>Apis dorsata</i> |
| DOBEE52215  | <i>Apis</i> | <i>Apis dorsata</i> |
| DOBEE52315  | <i>Apis</i> | <i>Apis dorsata</i> |
| DOBEE52415  | <i>Apis</i> | <i>Apis dorsata</i> |
| DOBEE52515  | <i>Apis</i> | <i>Apis dorsata</i> |
| DOBEE52615  | <i>Apis</i> | <i>Apis dorsata</i> |
| GBAH028606  | <i>Apis</i> | <i>Apis dorsata</i> |
| GBAH028706  | <i>Apis</i> | <i>Apis dorsata</i> |
| GBAH055906  | <i>Apis</i> | <i>Apis dorsata</i> |
| GBAH061206  | <i>Apis</i> | <i>Apis dorsata</i> |
| GBAH061306  | <i>Apis</i> | <i>Apis dorsata</i> |
| GBAH061406  | <i>Apis</i> | <i>Apis dorsata</i> |
| GBAH061506  | <i>Apis</i> | <i>Apis dorsata</i> |
| GBAH1641919 | <i>Apis</i> | <i>Apis dorsata</i> |

|              |             |                     |
|--------------|-------------|---------------------|
| GBAH1642019  | <i>Apis</i> | <i>Apis dorsata</i> |
| GBAH1642119  | <i>Apis</i> | <i>Apis dorsata</i> |
| GBAH1642219  | <i>Apis</i> | <i>Apis dorsata</i> |
| GBAH1669119  | <i>Apis</i> | <i>Apis dorsata</i> |
| GBAH1677219  | <i>Apis</i> | <i>Apis dorsata</i> |
| GBAH1677319  | <i>Apis</i> | <i>Apis dorsata</i> |
| GBAH1702319  | <i>Apis</i> | <i>Apis dorsata</i> |
| GBAH177106   | <i>Apis</i> | <i>Apis dorsata</i> |
| GBAH177306   | <i>Apis</i> | <i>Apis dorsata</i> |
| GBAH177406   | <i>Apis</i> | <i>Apis dorsata</i> |
| GBAH177506   | <i>Apis</i> | <i>Apis dorsata</i> |
| GBAH177606   | <i>Apis</i> | <i>Apis dorsata</i> |
| GBAH177706   | <i>Apis</i> | <i>Apis dorsata</i> |
| GBAH177806   | <i>Apis</i> | <i>Apis dorsata</i> |
| GBAH177906   | <i>Apis</i> | <i>Apis dorsata</i> |
| GBAH178006   | <i>Apis</i> | <i>Apis dorsata</i> |
| GBAH178106   | <i>Apis</i> | <i>Apis dorsata</i> |
| GBAH1823619  | <i>Apis</i> | <i>Apis dorsata</i> |
| GBAH1823719  | <i>Apis</i> | <i>Apis dorsata</i> |
| GBAH3072819  | <i>Apis</i> | <i>Apis dorsata</i> |
| GBAH3078919  | <i>Apis</i> | <i>Apis dorsata</i> |
| GBAH3082419  | <i>Apis</i> | <i>Apis dorsata</i> |
| GBAH524009   | <i>Apis</i> | <i>Apis dorsata</i> |
| GBAH524109   | <i>Apis</i> | <i>Apis dorsata</i> |
| GBAH618709   | <i>Apis</i> | <i>Apis dorsata</i> |
| GBHAP88714   | <i>Apis</i> | <i>Apis dorsata</i> |
| GBMIN7169917 | <i>Apis</i> | <i>Apis dorsata</i> |
| GBMIN7170017 | <i>Apis</i> | <i>Apis dorsata</i> |
| GBMIN7170117 | <i>Apis</i> | <i>Apis dorsata</i> |
| GBMIN7170217 | <i>Apis</i> | <i>Apis dorsata</i> |
| GBMIN7170317 | <i>Apis</i> | <i>Apis dorsata</i> |
| GBMIN7170417 | <i>Apis</i> | <i>Apis dorsata</i> |
| GBMIN7170517 | <i>Apis</i> | <i>Apis dorsata</i> |
| GBMIN7170617 | <i>Apis</i> | <i>Apis dorsata</i> |
| GBMIN7170717 | <i>Apis</i> | <i>Apis dorsata</i> |
| GBMIN7170817 | <i>Apis</i> | <i>Apis dorsata</i> |
| GBMIN7170917 | <i>Apis</i> | <i>Apis dorsata</i> |
| GBMIN7171017 | <i>Apis</i> | <i>Apis dorsata</i> |
| GBMIN7171117 | <i>Apis</i> | <i>Apis dorsata</i> |
| GBMIN7171217 | <i>Apis</i> | <i>Apis dorsata</i> |
| GBMIN7870617 | <i>Apis</i> | <i>Apis dorsata</i> |
| GBMIN7873317 | <i>Apis</i> | <i>Apis dorsata</i> |
| GBMIN7877317 | <i>Apis</i> | <i>Apis dorsata</i> |
| GBMIN7884517 | <i>Apis</i> | <i>Apis dorsata</i> |
| GBMIN7890417 | <i>Apis</i> | <i>Apis dorsata</i> |
| GBMIN7894917 | <i>Apis</i> | <i>Apis dorsata</i> |

|              |             |                     |
|--------------|-------------|---------------------|
| GBMIN7900817 | <i>Apis</i> | <i>Apis dorsata</i> |
| GBMIN7901717 | <i>Apis</i> | <i>Apis dorsata</i> |
| GBMIN7902517 | <i>Apis</i> | <i>Apis dorsata</i> |
| GBMIN7907217 | <i>Apis</i> | <i>Apis dorsata</i> |
| GBMIN7914817 | <i>Apis</i> | <i>Apis dorsata</i> |
| GBMIN7919617 | <i>Apis</i> | <i>Apis dorsata</i> |
| GBMIN7921317 | <i>Apis</i> | <i>Apis dorsata</i> |
| GBMNA1856319 | <i>Apis</i> | <i>Apis dorsata</i> |
| GBMNA1899519 | <i>Apis</i> | <i>Apis dorsata</i> |
| GBMNA3659919 | <i>Apis</i> | <i>Apis dorsata</i> |
| GBMNA996619  | <i>Apis</i> | <i>Apis dorsata</i> |
| GBMNB6126120 | <i>Apis</i> | <i>Apis dorsata</i> |
| GBMNB6286020 | <i>Apis</i> | <i>Apis dorsata</i> |
| MYENT00617   | <i>Apis</i> | <i>Apis dorsata</i> |
| MYENT10217   | <i>Apis</i> | <i>Apis dorsata</i> |
| PMNHD132515  | <i>Apis</i> | <i>Apis dorsata</i> |
| POPIN00519   | <i>Apis</i> | <i>Apis dorsata</i> |
| SABEE12015   | <i>Apis</i> | <i>Apis dorsata</i> |
| SABEE12115   | <i>Apis</i> | <i>Apis dorsata</i> |
| SABEE67215   | <i>Apis</i> | <i>Apis dorsata</i> |
| SABEE67315   | <i>Apis</i> | <i>Apis dorsata</i> |
| SABEE67415   | <i>Apis</i> | <i>Apis dorsata</i> |
| SABEE67515   | <i>Apis</i> | <i>Apis dorsata</i> |
| SABEE67615   | <i>Apis</i> | <i>Apis dorsata</i> |
| SABEE67715   | <i>Apis</i> | <i>Apis dorsata</i> |
| SABEE67815   | <i>Apis</i> | <i>Apis dorsata</i> |
| SABEE67915   | <i>Apis</i> | <i>Apis dorsata</i> |
| SABEE68015   | <i>Apis</i> | <i>Apis dorsata</i> |
| SABEE68115   | <i>Apis</i> | <i>Apis dorsata</i> |
| SABEE68215   | <i>Apis</i> | <i>Apis dorsata</i> |
| SABEE68315   | <i>Apis</i> | <i>Apis dorsata</i> |
| SABEE68415   | <i>Apis</i> | <i>Apis dorsata</i> |
| AGIRI28617   | <i>Apis</i> | <i>Apis florea</i>  |
| BOFTH43609   | <i>Apis</i> | <i>Apis florea</i>  |
| GBAH1644219  | <i>Apis</i> | <i>Apis florea</i>  |
| GBAH1676819  | <i>Apis</i> | <i>Apis florea</i>  |
| GBAH1676919  | <i>Apis</i> | <i>Apis florea</i>  |
| GBAH1677019  | <i>Apis</i> | <i>Apis florea</i>  |
| GBAH178406   | <i>Apis</i> | <i>Apis florea</i>  |
| GBAH1823819  | <i>Apis</i> | <i>Apis florea</i>  |
| GBAH1823919  | <i>Apis</i> | <i>Apis florea</i>  |
| GBAH1824019  | <i>Apis</i> | <i>Apis florea</i>  |
| GBAH1824119  | <i>Apis</i> | <i>Apis florea</i>  |
| GBAH1824219  | <i>Apis</i> | <i>Apis florea</i>  |
| GBAH1824319  | <i>Apis</i> | <i>Apis florea</i>  |
| GBAH1824419  | <i>Apis</i> | <i>Apis florea</i>  |

|              |             |                    |
|--------------|-------------|--------------------|
| GBAH1824519  | <i>Apis</i> | <i>Apis florea</i> |
| GBAH228907   | <i>Apis</i> | <i>Apis florea</i> |
| GBAH229007   | <i>Apis</i> | <i>Apis florea</i> |
| GBAH229107   | <i>Apis</i> | <i>Apis florea</i> |
| GBAH229207   | <i>Apis</i> | <i>Apis florea</i> |
| GBAH229307   | <i>Apis</i> | <i>Apis florea</i> |
| GBAH229407   | <i>Apis</i> | <i>Apis florea</i> |
| GBAH229507   | <i>Apis</i> | <i>Apis florea</i> |
| GBAH229607   | <i>Apis</i> | <i>Apis florea</i> |
| GBAH229707   | <i>Apis</i> | <i>Apis florea</i> |
| GBAH229807   | <i>Apis</i> | <i>Apis florea</i> |
| GBAH229907   | <i>Apis</i> | <i>Apis florea</i> |
| GBAH230007   | <i>Apis</i> | <i>Apis florea</i> |
| GBAH230107   | <i>Apis</i> | <i>Apis florea</i> |
| GBAH517309   | <i>Apis</i> | <i>Apis florea</i> |
| GBAH517409   | <i>Apis</i> | <i>Apis florea</i> |
| GBAH517509   | <i>Apis</i> | <i>Apis florea</i> |
| GBAH617209   | <i>Apis</i> | <i>Apis florea</i> |
| GBHAP88814   | <i>Apis</i> | <i>Apis florea</i> |
| GBMIN7171317 | <i>Apis</i> | <i>Apis florea</i> |
| GBMIN7171417 | <i>Apis</i> | <i>Apis florea</i> |
| GBMIN7171517 | <i>Apis</i> | <i>Apis florea</i> |
| GBMNA1686419 | <i>Apis</i> | <i>Apis florea</i> |
| GBMNA1900219 | <i>Apis</i> | <i>Apis florea</i> |
| GBMNA3659819 | <i>Apis</i> | <i>Apis florea</i> |
| GBMNB6286120 | <i>Apis</i> | <i>Apis florea</i> |
| GBMTG330116  | <i>Apis</i> | <i>Apis florea</i> |
| GMSUF18514   | <i>Apis</i> | <i>Apis florea</i> |
| GMSUG04114   | <i>Apis</i> | <i>Apis florea</i> |
| PMNHE15215   | <i>Apis</i> | <i>Apis florea</i> |
| POPIN00619   | <i>Apis</i> | <i>Apis florea</i> |
| SABEE79115   | <i>Apis</i> | <i>Apis florea</i> |
| SABEE79215   | <i>Apis</i> | <i>Apis florea</i> |
| SABEE79315   | <i>Apis</i> | <i>Apis florea</i> |
| SABEE79415   | <i>Apis</i> | <i>Apis florea</i> |
| SABEE79515   | <i>Apis</i> | <i>Apis florea</i> |
| SABEE79615   | <i>Apis</i> | <i>Apis florea</i> |
| SABEE80015   | <i>Apis</i> | <i>Apis florea</i> |
| SABEE80115   | <i>Apis</i> | <i>Apis florea</i> |
| SABEE80215   | <i>Apis</i> | <i>Apis florea</i> |
| SABEE80315   | <i>Apis</i> | <i>Apis florea</i> |
| SABEE80515   | <i>Apis</i> | <i>Apis florea</i> |
| SABEE80615   | <i>Apis</i> | <i>Apis florea</i> |
| SABEE80715   | <i>Apis</i> | <i>Apis florea</i> |
| SABEE80915   | <i>Apis</i> | <i>Apis florea</i> |
| SABEE81015   | <i>Apis</i> | <i>Apis florea</i> |



|            |             |                    |
|------------|-------------|--------------------|
| SABEE81115 | <i>Apis</i> | <i>Apis florea</i> |
| SABEE81215 | <i>Apis</i> | <i>Apis florea</i> |
| SABEE81315 | <i>Apis</i> | <i>Apis florea</i> |
| SABEE81415 | <i>Apis</i> | <i>Apis florea</i> |
| SABEE81515 | <i>Apis</i> | <i>Apis florea</i> |
| SABEE81615 | <i>Apis</i> | <i>Apis florea</i> |
| SABEE81715 | <i>Apis</i> | <i>Apis florea</i> |
| SABEE81915 | <i>Apis</i> | <i>Apis florea</i> |
| SABEE82015 | <i>Apis</i> | <i>Apis florea</i> |
| SABEE82115 | <i>Apis</i> | <i>Apis florea</i> |
| SABEE82215 | <i>Apis</i> | <i>Apis florea</i> |
| SABEE82315 | <i>Apis</i> | <i>Apis florea</i> |
| SABEE82415 | <i>Apis</i> | <i>Apis florea</i> |
| SABEE82515 | <i>Apis</i> | <i>Apis florea</i> |
| SABEE82615 | <i>Apis</i> | <i>Apis florea</i> |
| SABEE82815 | <i>Apis</i> | <i>Apis florea</i> |
| SABEE82915 | <i>Apis</i> | <i>Apis florea</i> |
| SABEE83015 | <i>Apis</i> | <i>Apis florea</i> |
| SABEE83115 | <i>Apis</i> | <i>Apis florea</i> |
| SABEE83315 | <i>Apis</i> | <i>Apis florea</i> |
| SABEE83415 | <i>Apis</i> | <i>Apis florea</i> |
| SABEE83515 | <i>Apis</i> | <i>Apis florea</i> |
| SABEE83615 | <i>Apis</i> | <i>Apis florea</i> |
| SABEE83715 | <i>Apis</i> | <i>Apis florea</i> |
| SABEE83815 | <i>Apis</i> | <i>Apis florea</i> |
| SABEE83915 | <i>Apis</i> | <i>Apis florea</i> |
| SABEE84015 | <i>Apis</i> | <i>Apis florea</i> |
| SABEE84115 | <i>Apis</i> | <i>Apis florea</i> |
| SABEE84215 | <i>Apis</i> | <i>Apis florea</i> |
| SABEE84315 | <i>Apis</i> | <i>Apis florea</i> |
| SABEE84415 | <i>Apis</i> | <i>Apis florea</i> |
| SABEE84515 | <i>Apis</i> | <i>Apis florea</i> |
| SABEE84615 | <i>Apis</i> | <i>Apis florea</i> |
| SABEE84715 | <i>Apis</i> | <i>Apis florea</i> |
| SABEE84815 | <i>Apis</i> | <i>Apis florea</i> |
| SABEE85015 | <i>Apis</i> | <i>Apis florea</i> |
| SABEE85115 | <i>Apis</i> | <i>Apis florea</i> |
| SABEE85215 | <i>Apis</i> | <i>Apis florea</i> |
| SABEE85315 | <i>Apis</i> | <i>Apis florea</i> |
| SABEE85415 | <i>Apis</i> | <i>Apis florea</i> |
| SABEE85515 | <i>Apis</i> | <i>Apis florea</i> |
| SABEE85615 | <i>Apis</i> | <i>Apis florea</i> |
| SABEE85715 | <i>Apis</i> | <i>Apis florea</i> |
| SABEE85815 | <i>Apis</i> | <i>Apis florea</i> |
| SABEE85915 | <i>Apis</i> | <i>Apis florea</i> |
| SABEE86015 | <i>Apis</i> | <i>Apis florea</i> |

|            |             |                    |
|------------|-------------|--------------------|
| SABEE86115 | <i>Apis</i> | <i>Apis florea</i> |
| SABEE86315 | <i>Apis</i> | <i>Apis florea</i> |
| SABEE86415 | <i>Apis</i> | <i>Apis florea</i> |
| SABEE86515 | <i>Apis</i> | <i>Apis florea</i> |
| SABEE86615 | <i>Apis</i> | <i>Apis florea</i> |
| SABEE86715 | <i>Apis</i> | <i>Apis florea</i> |
| SABEE86915 | <i>Apis</i> | <i>Apis florea</i> |
| SABEE87115 | <i>Apis</i> | <i>Apis florea</i> |
| SABEE87215 | <i>Apis</i> | <i>Apis florea</i> |
| SABEE87315 | <i>Apis</i> | <i>Apis florea</i> |
| SABEE87415 | <i>Apis</i> | <i>Apis florea</i> |
| SABEE87515 | <i>Apis</i> | <i>Apis florea</i> |
| SABEE87615 | <i>Apis</i> | <i>Apis florea</i> |
| SABEE87715 | <i>Apis</i> | <i>Apis florea</i> |
| SABEE87815 | <i>Apis</i> | <i>Apis florea</i> |
| SABEE87915 | <i>Apis</i> | <i>Apis florea</i> |
| SABEE88115 | <i>Apis</i> | <i>Apis florea</i> |
| SABEE88215 | <i>Apis</i> | <i>Apis florea</i> |
| SABEE88315 | <i>Apis</i> | <i>Apis florea</i> |
| SABEE88415 | <i>Apis</i> | <i>Apis florea</i> |
| SABEE88515 | <i>Apis</i> | <i>Apis florea</i> |
| SABEE88615 | <i>Apis</i> | <i>Apis florea</i> |
| SABEE88715 | <i>Apis</i> | <i>Apis florea</i> |
| SABEE88815 | <i>Apis</i> | <i>Apis florea</i> |
| SABEE88915 | <i>Apis</i> | <i>Apis florea</i> |
| SABEE89015 | <i>Apis</i> | <i>Apis florea</i> |
| SABEE89115 | <i>Apis</i> | <i>Apis florea</i> |
| SABEE89215 | <i>Apis</i> | <i>Apis florea</i> |
| SABEE89315 | <i>Apis</i> | <i>Apis florea</i> |
| SABEE89415 | <i>Apis</i> | <i>Apis florea</i> |
| SABEE89515 | <i>Apis</i> | <i>Apis florea</i> |
| SABEE89615 | <i>Apis</i> | <i>Apis florea</i> |
| SABEE89715 | <i>Apis</i> | <i>Apis florea</i> |
| SABEE89815 | <i>Apis</i> | <i>Apis florea</i> |
| SABEE89915 | <i>Apis</i> | <i>Apis florea</i> |
| SABEE90015 | <i>Apis</i> | <i>Apis florea</i> |
| SABEE90115 | <i>Apis</i> | <i>Apis florea</i> |
| SABEE90215 | <i>Apis</i> | <i>Apis florea</i> |
| SABEE90315 | <i>Apis</i> | <i>Apis florea</i> |
| SABEE90415 | <i>Apis</i> | <i>Apis florea</i> |
| SABEE90515 | <i>Apis</i> | <i>Apis florea</i> |
| SABEE90615 | <i>Apis</i> | <i>Apis florea</i> |
| SABEE90715 | <i>Apis</i> | <i>Apis florea</i> |
| SABEE90815 | <i>Apis</i> | <i>Apis florea</i> |
| SABEE90915 | <i>Apis</i> | <i>Apis florea</i> |
| SABEE91015 | <i>Apis</i> | <i>Apis florea</i> |

|            |             |                    |
|------------|-------------|--------------------|
| SABEE91115 | <i>Apis</i> | <i>Apis florea</i> |
| SABEE91215 | <i>Apis</i> | <i>Apis florea</i> |
| SABEE91315 | <i>Apis</i> | <i>Apis florea</i> |
| SABEE91415 | <i>Apis</i> | <i>Apis florea</i> |
| SABEE91515 | <i>Apis</i> | <i>Apis florea</i> |
| SABEE91615 | <i>Apis</i> | <i>Apis florea</i> |
| SABEE91715 | <i>Apis</i> | <i>Apis florea</i> |
| SABEE91815 | <i>Apis</i> | <i>Apis florea</i> |
| SABEE91915 | <i>Apis</i> | <i>Apis florea</i> |
| SABEE92015 | <i>Apis</i> | <i>Apis florea</i> |
| SABEE92115 | <i>Apis</i> | <i>Apis florea</i> |
| SABEE92215 | <i>Apis</i> | <i>Apis florea</i> |
| SABEE92315 | <i>Apis</i> | <i>Apis florea</i> |
| SABEE92415 | <i>Apis</i> | <i>Apis florea</i> |
| SABEE92515 | <i>Apis</i> | <i>Apis florea</i> |
| SABEE92615 | <i>Apis</i> | <i>Apis florea</i> |
| SABEE92715 | <i>Apis</i> | <i>Apis florea</i> |
| SABEE92815 | <i>Apis</i> | <i>Apis florea</i> |
| SABEE92915 | <i>Apis</i> | <i>Apis florea</i> |
| SABEE93015 | <i>Apis</i> | <i>Apis florea</i> |
| SABEE93115 | <i>Apis</i> | <i>Apis florea</i> |
| SABEE93215 | <i>Apis</i> | <i>Apis florea</i> |
| SABEE93315 | <i>Apis</i> | <i>Apis florea</i> |
| SABEE93415 | <i>Apis</i> | <i>Apis florea</i> |
| SABEE93515 | <i>Apis</i> | <i>Apis florea</i> |
| SABEE93615 | <i>Apis</i> | <i>Apis florea</i> |
| SABEE93715 | <i>Apis</i> | <i>Apis florea</i> |
| SABEE93815 | <i>Apis</i> | <i>Apis florea</i> |
| SABEE93915 | <i>Apis</i> | <i>Apis florea</i> |
| SABEE94015 | <i>Apis</i> | <i>Apis florea</i> |
| SABEE94115 | <i>Apis</i> | <i>Apis florea</i> |
| SABEE94215 | <i>Apis</i> | <i>Apis florea</i> |
| SABEE94315 | <i>Apis</i> | <i>Apis florea</i> |
| SABEE94415 | <i>Apis</i> | <i>Apis florea</i> |
| SABEE94515 | <i>Apis</i> | <i>Apis florea</i> |
| SABEE94615 | <i>Apis</i> | <i>Apis florea</i> |
| SABEE94715 | <i>Apis</i> | <i>Apis florea</i> |
| SABEE94815 | <i>Apis</i> | <i>Apis florea</i> |
| SABEE94915 | <i>Apis</i> | <i>Apis florea</i> |
| SABEE95115 | <i>Apis</i> | <i>Apis florea</i> |
| SABEE95215 | <i>Apis</i> | <i>Apis florea</i> |
| SABEE95415 | <i>Apis</i> | <i>Apis florea</i> |
| SABEE95515 | <i>Apis</i> | <i>Apis florea</i> |
| SABEE95615 | <i>Apis</i> | <i>Apis florea</i> |
| SABEE95715 | <i>Apis</i> | <i>Apis florea</i> |
| SABEE96215 | <i>Apis</i> | <i>Apis florea</i> |

|              |             |                           |
|--------------|-------------|---------------------------|
| GBAH028406   | <i>Apis</i> | <i>Apis koschevnikovi</i> |
| GBAH028506   | <i>Apis</i> | <i>Apis koschevnikovi</i> |
| GBAH061106   | <i>Apis</i> | <i>Apis koschevnikovi</i> |
| GBAH1308919  | <i>Apis</i> | <i>Apis koschevnikovi</i> |
| GBAH153306   | <i>Apis</i> | <i>Apis koschevnikovi</i> |
| GBAH153406   | <i>Apis</i> | <i>Apis koschevnikovi</i> |
| GBAH153506   | <i>Apis</i> | <i>Apis koschevnikovi</i> |
| GBAH153606   | <i>Apis</i> | <i>Apis koschevnikovi</i> |
| GBAH179806   | <i>Apis</i> | <i>Apis koschevnikovi</i> |
| GBAH179906   | <i>Apis</i> | <i>Apis koschevnikovi</i> |
| GBAH180006   | <i>Apis</i> | <i>Apis koschevnikovi</i> |
| GBAH180106   | <i>Apis</i> | <i>Apis koschevnikovi</i> |
| GBAH180206   | <i>Apis</i> | <i>Apis koschevnikovi</i> |
| GBAH180306   | <i>Apis</i> | <i>Apis koschevnikovi</i> |
| GBAH180406   | <i>Apis</i> | <i>Apis koschevnikovi</i> |
| GBAH180506   | <i>Apis</i> | <i>Apis koschevnikovi</i> |
| GBAH618409   | <i>Apis</i> | <i>Apis koschevnikovi</i> |
| GBAH618509   | <i>Apis</i> | <i>Apis koschevnikovi</i> |
| GBAH1824719  | <i>Apis</i> | <i>Apis laboriosa</i>     |
| GBMNA1775219 | <i>Apis</i> | <i>Apis laboriosa</i>     |
| GBMNA3659719 | <i>Apis</i> | <i>Apis laboriosa</i>     |
| GBMNA996519  | <i>Apis</i> | <i>Apis laboriosa</i>     |
| AACTA05120   | <i>Apis</i> | <i>Apis mellifera</i>     |
| AACTA05420   | <i>Apis</i> | <i>Apis mellifera</i>     |
| ASGLE80910   | <i>Apis</i> | <i>Apis mellifera</i>     |
| ASINH00212   | <i>Apis</i> | <i>Apis mellifera</i>     |
| ASINH00412   | <i>Apis</i> | <i>Apis mellifera</i>     |
| ASINH00512   | <i>Apis</i> | <i>Apis mellifera</i>     |
| ASINH00912   | <i>Apis</i> | <i>Apis mellifera</i>     |
| AUSBC06212   | <i>Apis</i> | <i>Apis mellifera</i>     |
| AUSBC06312   | <i>Apis</i> | <i>Apis mellifera</i>     |
| AUSBC06612   | <i>Apis</i> | <i>Apis mellifera</i>     |
| AUSBC208812  | <i>Apis</i> | <i>Apis mellifera</i>     |
| AUSBC209312  | <i>Apis</i> | <i>Apis mellifera</i>     |
| AUSBC209412  | <i>Apis</i> | <i>Apis mellifera</i>     |
| AUSBC209912  | <i>Apis</i> | <i>Apis mellifera</i>     |
| AUSBC210012  | <i>Apis</i> | <i>Apis mellifera</i>     |
| AUSBC23712   | <i>Apis</i> | <i>Apis mellifera</i>     |
| AUSCL12212   | <i>Apis</i> | <i>Apis mellifera</i>     |
| AUSCL13212   | <i>Apis</i> | <i>Apis mellifera</i>     |
| AUSCL230412  | <i>Apis</i> | <i>Apis mellifera</i>     |
| AUSCL230512  | <i>Apis</i> | <i>Apis mellifera</i>     |
| AUSCL230912  | <i>Apis</i> | <i>Apis mellifera</i>     |
| AWCI01109    | <i>Apis</i> | <i>Apis mellifera</i>     |
| AWCI01209    | <i>Apis</i> | <i>Apis mellifera</i>     |
| AWCI02709    | <i>Apis</i> | <i>Apis mellifera</i>     |

|             |             |                       |
|-------------|-------------|-----------------------|
| BBHYA00612  | <i>Apis</i> | <i>Apis mellifera</i> |
| BBHYA09812  | <i>Apis</i> | <i>Apis mellifera</i> |
| BBHYA122612 | <i>Apis</i> | <i>Apis mellifera</i> |
| BBHYA126312 | <i>Apis</i> | <i>Apis mellifera</i> |
| BBHYA130112 | <i>Apis</i> | <i>Apis mellifera</i> |
| BBHYA257412 | <i>Apis</i> | <i>Apis mellifera</i> |
| BBHYA301512 | <i>Apis</i> | <i>Apis mellifera</i> |
| BBHYA386912 | <i>Apis</i> | <i>Apis mellifera</i> |
| BBHYA387512 | <i>Apis</i> | <i>Apis mellifera</i> |
| BBHYA412212 | <i>Apis</i> | <i>Apis mellifera</i> |
| BBHYA82112  | <i>Apis</i> | <i>Apis mellifera</i> |
| BBHYA82212  | <i>Apis</i> | <i>Apis mellifera</i> |
| BBHYA82312  | <i>Apis</i> | <i>Apis mellifera</i> |
| BBHYA82412  | <i>Apis</i> | <i>Apis mellifera</i> |
| BBHYA82512  | <i>Apis</i> | <i>Apis mellifera</i> |
| BBHYA82712  | <i>Apis</i> | <i>Apis mellifera</i> |
| BBHYA82812  | <i>Apis</i> | <i>Apis mellifera</i> |
| BBHYA82912  | <i>Apis</i> | <i>Apis mellifera</i> |
| BBHYA83012  | <i>Apis</i> | <i>Apis mellifera</i> |
| BBHYA83112  | <i>Apis</i> | <i>Apis mellifera</i> |
| BBHYA83212  | <i>Apis</i> | <i>Apis mellifera</i> |
| BBHYA83312  | <i>Apis</i> | <i>Apis mellifera</i> |
| BBHYA83412  | <i>Apis</i> | <i>Apis mellifera</i> |
| BBHYA83512  | <i>Apis</i> | <i>Apis mellifera</i> |
| BBHYA83612  | <i>Apis</i> | <i>Apis mellifera</i> |
| BBHYA83712  | <i>Apis</i> | <i>Apis mellifera</i> |
| BBHYA83812  | <i>Apis</i> | <i>Apis mellifera</i> |
| BBHYA85812  | <i>Apis</i> | <i>Apis mellifera</i> |
| BBHYA85912  | <i>Apis</i> | <i>Apis mellifera</i> |
| BBHYA86012  | <i>Apis</i> | <i>Apis mellifera</i> |
| BBHYA86112  | <i>Apis</i> | <i>Apis mellifera</i> |
| BBHYA86212  | <i>Apis</i> | <i>Apis mellifera</i> |
| BBHYA88012  | <i>Apis</i> | <i>Apis mellifera</i> |
| BBHYA88212  | <i>Apis</i> | <i>Apis mellifera</i> |
| BBHYA90012  | <i>Apis</i> | <i>Apis mellifera</i> |
| BBHYA93512  | <i>Apis</i> | <i>Apis mellifera</i> |
| BBHYA95812  | <i>Apis</i> | <i>Apis mellifera</i> |
| BBHYA95912  | <i>Apis</i> | <i>Apis mellifera</i> |
| BBHYG102310 | <i>Apis</i> | <i>Apis mellifera</i> |
| BBHYG62510  | <i>Apis</i> | <i>Apis mellifera</i> |
| BBHYG62610  | <i>Apis</i> | <i>Apis mellifera</i> |
| BBHYG62710  | <i>Apis</i> | <i>Apis mellifera</i> |
| BBHYG62810  | <i>Apis</i> | <i>Apis mellifera</i> |
| BBHYG62910  | <i>Apis</i> | <i>Apis mellifera</i> |
| BBHYG63110  | <i>Apis</i> | <i>Apis mellifera</i> |
| BBHYG64010  | <i>Apis</i> | <i>Apis mellifera</i> |

|             |             |                       |
|-------------|-------------|-----------------------|
| BBHYL29710  | <i>Apis</i> | <i>Apis mellifera</i> |
| BBHYL29810  | <i>Apis</i> | <i>Apis mellifera</i> |
| BBHYL30910  | <i>Apis</i> | <i>Apis mellifera</i> |
| BBHYN16610  | <i>Apis</i> | <i>Apis mellifera</i> |
| BEEEE02515  | <i>Apis</i> | <i>Apis mellifera</i> |
| BEEEE02615  | <i>Apis</i> | <i>Apis mellifera</i> |
| BEEEE09315  | <i>Apis</i> | <i>Apis mellifera</i> |
| BEEEE27716  | <i>Apis</i> | <i>Apis mellifera</i> |
| BEEMH00106  | <i>Apis</i> | <i>Apis mellifera</i> |
| BEEMH00206  | <i>Apis</i> | <i>Apis mellifera</i> |
| BEEMH01506  | <i>Apis</i> | <i>Apis mellifera</i> |
| BEEMH01606  | <i>Apis</i> | <i>Apis mellifera</i> |
| BEEMH03406  | <i>Apis</i> | <i>Apis mellifera</i> |
| BEEMH03706  | <i>Apis</i> | <i>Apis mellifera</i> |
| BEEMH04006  | <i>Apis</i> | <i>Apis mellifera</i> |
| BEEMH05406  | <i>Apis</i> | <i>Apis mellifera</i> |
| BEEMH06306  | <i>Apis</i> | <i>Apis mellifera</i> |
| BEEMH08106  | <i>Apis</i> | <i>Apis mellifera</i> |
| BEEMH09106  | <i>Apis</i> | <i>Apis mellifera</i> |
| BEEMH09206  | <i>Apis</i> | <i>Apis mellifera</i> |
| BEEMH09306  | <i>Apis</i> | <i>Apis mellifera</i> |
| BEEMH10406  | <i>Apis</i> | <i>Apis mellifera</i> |
| BEEMH11306  | <i>Apis</i> | <i>Apis mellifera</i> |
| BEEMH12106  | <i>Apis</i> | <i>Apis mellifera</i> |
| BEEMH12206  | <i>Apis</i> | <i>Apis mellifera</i> |
| BEEMH12606  | <i>Apis</i> | <i>Apis mellifera</i> |
| BEEMH13206  | <i>Apis</i> | <i>Apis mellifera</i> |
| BEEMH15106  | <i>Apis</i> | <i>Apis mellifera</i> |
| BEEMH16306  | <i>Apis</i> | <i>Apis mellifera</i> |
| BEEMH17006  | <i>Apis</i> | <i>Apis mellifera</i> |
| BEEMH19206  | <i>Apis</i> | <i>Apis mellifera</i> |
| BEEMH23106  | <i>Apis</i> | <i>Apis mellifera</i> |
| BEEMH23206  | <i>Apis</i> | <i>Apis mellifera</i> |
| BEEMH28506  | <i>Apis</i> | <i>Apis mellifera</i> |
| BEEMH29106  | <i>Apis</i> | <i>Apis mellifera</i> |
| BEEMH30606  | <i>Apis</i> | <i>Apis mellifera</i> |
| BEEMH30706  | <i>Apis</i> | <i>Apis mellifera</i> |
| BEEMH30806  | <i>Apis</i> | <i>Apis mellifera</i> |
| BEEMH30906  | <i>Apis</i> | <i>Apis mellifera</i> |
| BEEMH31306  | <i>Apis</i> | <i>Apis mellifera</i> |
| BEEMH31706  | <i>Apis</i> | <i>Apis mellifera</i> |
| BEO04404    | <i>Apis</i> | <i>Apis mellifera</i> |
| BEO04504    | <i>Apis</i> | <i>Apis mellifera</i> |
| BEO04604    | <i>Apis</i> | <i>Apis mellifera</i> |
| CNBAN65913  | <i>Apis</i> | <i>Apis mellifera</i> |
| CNEIB147612 | <i>Apis</i> | <i>Apis mellifera</i> |

|             |             |                       |
|-------------|-------------|-----------------------|
| CNEIB147712 | <i>Apis</i> | <i>Apis mellifera</i> |
| CNEIB147912 | <i>Apis</i> | <i>Apis mellifera</i> |
| CNEIB149812 | <i>Apis</i> | <i>Apis mellifera</i> |
| CNEIB149912 | <i>Apis</i> | <i>Apis mellifera</i> |
| CNPEE14114  | <i>Apis</i> | <i>Apis mellifera</i> |
| CNPPC129712 | <i>Apis</i> | <i>Apis mellifera</i> |
| CNPPE121112 | <i>Apis</i> | <i>Apis mellifera</i> |
| CNRGA09515  | <i>Apis</i> | <i>Apis mellifera</i> |
| CNSLM02413  | <i>Apis</i> | <i>Apis mellifera</i> |
| CNSLN01113  | <i>Apis</i> | <i>Apis mellifera</i> |
| CRHIA12515  | <i>Apis</i> | <i>Apis mellifera</i> |
| CRHIA63816  | <i>Apis</i> | <i>Apis mellifera</i> |
| CRHIC67516  | <i>Apis</i> | <i>Apis mellifera</i> |
| CRHIC67716  | <i>Apis</i> | <i>Apis mellifera</i> |
| CRHIC67816  | <i>Apis</i> | <i>Apis mellifera</i> |
| CRHIC67916  | <i>Apis</i> | <i>Apis mellifera</i> |
| CRHIC68016  | <i>Apis</i> | <i>Apis mellifera</i> |
| CRHID124216 | <i>Apis</i> | <i>Apis mellifera</i> |
| CRHID124316 | <i>Apis</i> | <i>Apis mellifera</i> |
| CRHID124416 | <i>Apis</i> | <i>Apis mellifera</i> |
| CRHID124516 | <i>Apis</i> | <i>Apis mellifera</i> |
| CRHID124616 | <i>Apis</i> | <i>Apis mellifera</i> |
| CRHIE105616 | <i>Apis</i> | <i>Apis mellifera</i> |
| DOBEE15815  | <i>Apis</i> | <i>Apis mellifera</i> |
| DOBEE16715  | <i>Apis</i> | <i>Apis mellifera</i> |
| DOBEE17715  | <i>Apis</i> | <i>Apis mellifera</i> |
| ERPIR20912  | <i>Apis</i> | <i>Apis mellifera</i> |
| ETKB04413   | <i>Apis</i> | <i>Apis mellifera</i> |
| ETKB04513   | <i>Apis</i> | <i>Apis mellifera</i> |
| ETKB04613   | <i>Apis</i> | <i>Apis mellifera</i> |
| ETKB04713   | <i>Apis</i> | <i>Apis mellifera</i> |
| ETKB04813   | <i>Apis</i> | <i>Apis mellifera</i> |
| ETKB04913   | <i>Apis</i> | <i>Apis mellifera</i> |
| ETKB05013   | <i>Apis</i> | <i>Apis mellifera</i> |
| ETKB05113   | <i>Apis</i> | <i>Apis mellifera</i> |
| ETKB05213   | <i>Apis</i> | <i>Apis mellifera</i> |
| ETKB08713   | <i>Apis</i> | <i>Apis mellifera</i> |
| ETKB08813   | <i>Apis</i> | <i>Apis mellifera</i> |
| ETKB08913   | <i>Apis</i> | <i>Apis mellifera</i> |
| ETKB09013   | <i>Apis</i> | <i>Apis mellifera</i> |
| ETKB09113   | <i>Apis</i> | <i>Apis mellifera</i> |
| ETKB09413   | <i>Apis</i> | <i>Apis mellifera</i> |
| ETKB09513   | <i>Apis</i> | <i>Apis mellifera</i> |
| ETKB09913   | <i>Apis</i> | <i>Apis mellifera</i> |
| ETKB11013   | <i>Apis</i> | <i>Apis mellifera</i> |
| ETKB11113   | <i>Apis</i> | <i>Apis mellifera</i> |

|            |             |                       |
|------------|-------------|-----------------------|
| ETKB11213  | <i>Apis</i> | <i>Apis mellifera</i> |
| ETKB11313  | <i>Apis</i> | <i>Apis mellifera</i> |
| ETKB11413  | <i>Apis</i> | <i>Apis mellifera</i> |
| ETKB12213  | <i>Apis</i> | <i>Apis mellifera</i> |
| ETKB12313  | <i>Apis</i> | <i>Apis mellifera</i> |
| ETKB12413  | <i>Apis</i> | <i>Apis mellifera</i> |
| ETKB12513  | <i>Apis</i> | <i>Apis mellifera</i> |
| ETKB12613  | <i>Apis</i> | <i>Apis mellifera</i> |
| ETKB12713  | <i>Apis</i> | <i>Apis mellifera</i> |
| ETKB13813  | <i>Apis</i> | <i>Apis mellifera</i> |
| ETKB14413  | <i>Apis</i> | <i>Apis mellifera</i> |
| ETKB14513  | <i>Apis</i> | <i>Apis mellifera</i> |
| ETKB15713  | <i>Apis</i> | <i>Apis mellifera</i> |
| ETKB19013  | <i>Apis</i> | <i>Apis mellifera</i> |
| ETKB20713  | <i>Apis</i> | <i>Apis mellifera</i> |
| ETKB20813  | <i>Apis</i> | <i>Apis mellifera</i> |
| ETKB20913  | <i>Apis</i> | <i>Apis mellifera</i> |
| ETKB22013  | <i>Apis</i> | <i>Apis mellifera</i> |
| ETKB22113  | <i>Apis</i> | <i>Apis mellifera</i> |
| ETKB22213  | <i>Apis</i> | <i>Apis mellifera</i> |
| ETKB25913  | <i>Apis</i> | <i>Apis mellifera</i> |
| ETKB26013  | <i>Apis</i> | <i>Apis mellifera</i> |
| ETKB26113  | <i>Apis</i> | <i>Apis mellifera</i> |
| ETKB27213  | <i>Apis</i> | <i>Apis mellifera</i> |
| ETKB28513  | <i>Apis</i> | <i>Apis mellifera</i> |
| GBAH028906 | <i>Apis</i> | <i>Apis mellifera</i> |
| GBAH029906 | <i>Apis</i> | <i>Apis mellifera</i> |
| GBAH056006 | <i>Apis</i> | <i>Apis mellifera</i> |
| GBAH062906 | <i>Apis</i> | <i>Apis mellifera</i> |
| GBAH063006 | <i>Apis</i> | <i>Apis mellifera</i> |
| GBAH063106 | <i>Apis</i> | <i>Apis mellifera</i> |
| GBAH063206 | <i>Apis</i> | <i>Apis mellifera</i> |
| GBAH063306 | <i>Apis</i> | <i>Apis mellifera</i> |
| GBAH063406 | <i>Apis</i> | <i>Apis mellifera</i> |
| GBAH063506 | <i>Apis</i> | <i>Apis mellifera</i> |
| GBAH063606 | <i>Apis</i> | <i>Apis mellifera</i> |
| GBAH063706 | <i>Apis</i> | <i>Apis mellifera</i> |
| GBAH063806 | <i>Apis</i> | <i>Apis mellifera</i> |
| GBAH063906 | <i>Apis</i> | <i>Apis mellifera</i> |
| GBAH064006 | <i>Apis</i> | <i>Apis mellifera</i> |
| GBAH064106 | <i>Apis</i> | <i>Apis mellifera</i> |
| GBAH064206 | <i>Apis</i> | <i>Apis mellifera</i> |
| GBAH064306 | <i>Apis</i> | <i>Apis mellifera</i> |
| GBAH064406 | <i>Apis</i> | <i>Apis mellifera</i> |
| GBAH064506 | <i>Apis</i> | <i>Apis mellifera</i> |
| GBAH064606 | <i>Apis</i> | <i>Apis mellifera</i> |



|             |             |                       |
|-------------|-------------|-----------------------|
| GBAH064706  | <i>Apis</i> | <i>Apis mellifera</i> |
| GBAH064806  | <i>Apis</i> | <i>Apis mellifera</i> |
| GBAH064906  | <i>Apis</i> | <i>Apis mellifera</i> |
| GBAH065006  | <i>Apis</i> | <i>Apis mellifera</i> |
| GBAH065106  | <i>Apis</i> | <i>Apis mellifera</i> |
| GBAH065206  | <i>Apis</i> | <i>Apis mellifera</i> |
| GBAH065306  | <i>Apis</i> | <i>Apis mellifera</i> |
| GBAH065406  | <i>Apis</i> | <i>Apis mellifera</i> |
| GBAH065506  | <i>Apis</i> | <i>Apis mellifera</i> |
| GBAH065606  | <i>Apis</i> | <i>Apis mellifera</i> |
| GBAH065706  | <i>Apis</i> | <i>Apis mellifera</i> |
| GBAH065806  | <i>Apis</i> | <i>Apis mellifera</i> |
| GBAH065906  | <i>Apis</i> | <i>Apis mellifera</i> |
| GBAH066006  | <i>Apis</i> | <i>Apis mellifera</i> |
| GBAH1501819 | <i>Apis</i> | <i>Apis mellifera</i> |
| GBAH1501919 | <i>Apis</i> | <i>Apis mellifera</i> |
| GBAH1614419 | <i>Apis</i> | <i>Apis mellifera</i> |
| GBAH1614519 | <i>Apis</i> | <i>Apis mellifera</i> |
| GBAH1614619 | <i>Apis</i> | <i>Apis mellifera</i> |
| GBAH1614719 | <i>Apis</i> | <i>Apis mellifera</i> |
| GBAH1614819 | <i>Apis</i> | <i>Apis mellifera</i> |
| GBAH1614919 | <i>Apis</i> | <i>Apis mellifera</i> |
| GBAH1615019 | <i>Apis</i> | <i>Apis mellifera</i> |
| GBAH1615119 | <i>Apis</i> | <i>Apis mellifera</i> |
| GBAH1615219 | <i>Apis</i> | <i>Apis mellifera</i> |
| GBAH1615319 | <i>Apis</i> | <i>Apis mellifera</i> |
| GBAH1615419 | <i>Apis</i> | <i>Apis mellifera</i> |
| GBAH1615519 | <i>Apis</i> | <i>Apis mellifera</i> |
| GBAH1669419 | <i>Apis</i> | <i>Apis mellifera</i> |
| GBAH1669519 | <i>Apis</i> | <i>Apis mellifera</i> |
| GBAH1669619 | <i>Apis</i> | <i>Apis mellifera</i> |
| GBAH1669719 | <i>Apis</i> | <i>Apis mellifera</i> |
| GBAH1669819 | <i>Apis</i> | <i>Apis mellifera</i> |
| GBAH1669919 | <i>Apis</i> | <i>Apis mellifera</i> |
| GBAH1670019 | <i>Apis</i> | <i>Apis mellifera</i> |
| GBAH1670119 | <i>Apis</i> | <i>Apis mellifera</i> |
| GBAH1670219 | <i>Apis</i> | <i>Apis mellifera</i> |
| GBAH1670319 | <i>Apis</i> | <i>Apis mellifera</i> |
| GBAH1670419 | <i>Apis</i> | <i>Apis mellifera</i> |
| GBAH1670519 | <i>Apis</i> | <i>Apis mellifera</i> |
| GBAH1670619 | <i>Apis</i> | <i>Apis mellifera</i> |
| GBAH1670719 | <i>Apis</i> | <i>Apis mellifera</i> |
| GBAH1670819 | <i>Apis</i> | <i>Apis mellifera</i> |
| GBAH1670919 | <i>Apis</i> | <i>Apis mellifera</i> |
| GBAH1671019 | <i>Apis</i> | <i>Apis mellifera</i> |
| GBAH1671119 | <i>Apis</i> | <i>Apis mellifera</i> |

|             |             |                       |
|-------------|-------------|-----------------------|
| GBAH1671219 | <i>Apis</i> | <i>Apis mellifera</i> |
| GBAH1671319 | <i>Apis</i> | <i>Apis mellifera</i> |
| GBAH1671419 | <i>Apis</i> | <i>Apis mellifera</i> |
| GBAH1671519 | <i>Apis</i> | <i>Apis mellifera</i> |
| GBAH1671619 | <i>Apis</i> | <i>Apis mellifera</i> |
| GBAH1671719 | <i>Apis</i> | <i>Apis mellifera</i> |
| GBAH1671819 | <i>Apis</i> | <i>Apis mellifera</i> |
| GBAH1671919 | <i>Apis</i> | <i>Apis mellifera</i> |
| GBAH1672019 | <i>Apis</i> | <i>Apis mellifera</i> |
| GBAH1672119 | <i>Apis</i> | <i>Apis mellifera</i> |
| GBAH1672219 | <i>Apis</i> | <i>Apis mellifera</i> |
| GBAH1672319 | <i>Apis</i> | <i>Apis mellifera</i> |
| GBAH1672419 | <i>Apis</i> | <i>Apis mellifera</i> |
| GBAH1672519 | <i>Apis</i> | <i>Apis mellifera</i> |
| GBAH1672619 | <i>Apis</i> | <i>Apis mellifera</i> |
| GBAH1672719 | <i>Apis</i> | <i>Apis mellifera</i> |
| GBAH1672819 | <i>Apis</i> | <i>Apis mellifera</i> |
| GBAH1672919 | <i>Apis</i> | <i>Apis mellifera</i> |
| GBAH1673019 | <i>Apis</i> | <i>Apis mellifera</i> |
| GBAH1673119 | <i>Apis</i> | <i>Apis mellifera</i> |
| GBAH1673219 | <i>Apis</i> | <i>Apis mellifera</i> |
| GBAH1673319 | <i>Apis</i> | <i>Apis mellifera</i> |
| GBAH1673419 | <i>Apis</i> | <i>Apis mellifera</i> |
| GBAH1673519 | <i>Apis</i> | <i>Apis mellifera</i> |
| GBAH1673619 | <i>Apis</i> | <i>Apis mellifera</i> |
| GBAH1673719 | <i>Apis</i> | <i>Apis mellifera</i> |
| GBAH1673819 | <i>Apis</i> | <i>Apis mellifera</i> |
| GBAH1673919 | <i>Apis</i> | <i>Apis mellifera</i> |
| GBAH1674019 | <i>Apis</i> | <i>Apis mellifera</i> |
| GBAH1674119 | <i>Apis</i> | <i>Apis mellifera</i> |
| GBAH1674219 | <i>Apis</i> | <i>Apis mellifera</i> |
| GBAH1674319 | <i>Apis</i> | <i>Apis mellifera</i> |
| GBAH1674419 | <i>Apis</i> | <i>Apis mellifera</i> |
| GBAH1674519 | <i>Apis</i> | <i>Apis mellifera</i> |
| GBAH1674619 | <i>Apis</i> | <i>Apis mellifera</i> |
| GBAH1674719 | <i>Apis</i> | <i>Apis mellifera</i> |
| GBAH1674819 | <i>Apis</i> | <i>Apis mellifera</i> |
| GBAH1674919 | <i>Apis</i> | <i>Apis mellifera</i> |
| GBAH1675019 | <i>Apis</i> | <i>Apis mellifera</i> |
| GBAH1675119 | <i>Apis</i> | <i>Apis mellifera</i> |
| GBAH1675219 | <i>Apis</i> | <i>Apis mellifera</i> |
| GBAH1675319 | <i>Apis</i> | <i>Apis mellifera</i> |
| GBAH1675419 | <i>Apis</i> | <i>Apis mellifera</i> |
| GBAH1675519 | <i>Apis</i> | <i>Apis mellifera</i> |
| GBAH1675619 | <i>Apis</i> | <i>Apis mellifera</i> |
| GBAH1675719 | <i>Apis</i> | <i>Apis mellifera</i> |

|             |             |                       |
|-------------|-------------|-----------------------|
| GBAH1675819 | <i>Apis</i> | <i>Apis mellifera</i> |
| GBAH1675919 | <i>Apis</i> | <i>Apis mellifera</i> |
| GBAH1676019 | <i>Apis</i> | <i>Apis mellifera</i> |
| GBAH1676119 | <i>Apis</i> | <i>Apis mellifera</i> |
| GBAH1709019 | <i>Apis</i> | <i>Apis mellifera</i> |
| GBAH1741819 | <i>Apis</i> | <i>Apis mellifera</i> |
| GBAH1742219 | <i>Apis</i> | <i>Apis mellifera</i> |
| GBAH1742319 | <i>Apis</i> | <i>Apis mellifera</i> |
| GBAH1766219 | <i>Apis</i> | <i>Apis mellifera</i> |
| GBAH1772319 | <i>Apis</i> | <i>Apis mellifera</i> |
| GBAH1772419 | <i>Apis</i> | <i>Apis mellifera</i> |
| GBAH1772519 | <i>Apis</i> | <i>Apis mellifera</i> |
| GBAH1772619 | <i>Apis</i> | <i>Apis mellifera</i> |
| GBAH1772719 | <i>Apis</i> | <i>Apis mellifera</i> |
| GBAH1772819 | <i>Apis</i> | <i>Apis mellifera</i> |
| GBAH1772919 | <i>Apis</i> | <i>Apis mellifera</i> |
| GBAH1773019 | <i>Apis</i> | <i>Apis mellifera</i> |
| GBAH1773119 | <i>Apis</i> | <i>Apis mellifera</i> |
| GBAH1773219 | <i>Apis</i> | <i>Apis mellifera</i> |
| GBAH1773319 | <i>Apis</i> | <i>Apis mellifera</i> |
| GBAH1773419 | <i>Apis</i> | <i>Apis mellifera</i> |
| GBAH1776519 | <i>Apis</i> | <i>Apis mellifera</i> |
| GBAH1776619 | <i>Apis</i> | <i>Apis mellifera</i> |
| GBAH1776719 | <i>Apis</i> | <i>Apis mellifera</i> |
| GBAH1776819 | <i>Apis</i> | <i>Apis mellifera</i> |
| GBAH1776919 | <i>Apis</i> | <i>Apis mellifera</i> |
| GBAH1777019 | <i>Apis</i> | <i>Apis mellifera</i> |
| GBAH1777119 | <i>Apis</i> | <i>Apis mellifera</i> |
| GBAH1777219 | <i>Apis</i> | <i>Apis mellifera</i> |
| GBAH1777319 | <i>Apis</i> | <i>Apis mellifera</i> |
| GBAH1777419 | <i>Apis</i> | <i>Apis mellifera</i> |
| GBAH1777519 | <i>Apis</i> | <i>Apis mellifera</i> |
| GBAH1777619 | <i>Apis</i> | <i>Apis mellifera</i> |
| GBAH1777719 | <i>Apis</i> | <i>Apis mellifera</i> |
| GBAH1777819 | <i>Apis</i> | <i>Apis mellifera</i> |
| GBAH1777919 | <i>Apis</i> | <i>Apis mellifera</i> |
| GBAH1778019 | <i>Apis</i> | <i>Apis mellifera</i> |
| GBAH1778119 | <i>Apis</i> | <i>Apis mellifera</i> |
| GBAH1786819 | <i>Apis</i> | <i>Apis mellifera</i> |
| GBAH1787219 | <i>Apis</i> | <i>Apis mellifera</i> |
| GBAH1787419 | <i>Apis</i> | <i>Apis mellifera</i> |
| GBAH1788219 | <i>Apis</i> | <i>Apis mellifera</i> |
| GBAH1788419 | <i>Apis</i> | <i>Apis mellifera</i> |
| GBAH1788619 | <i>Apis</i> | <i>Apis mellifera</i> |
| GBAH1788819 | <i>Apis</i> | <i>Apis mellifera</i> |
| GBAH1789219 | <i>Apis</i> | <i>Apis mellifera</i> |

|              |             |                       |
|--------------|-------------|-----------------------|
| GBAH1825119  | <i>Apis</i> | <i>Apis mellifera</i> |
| GBAH1825219  | <i>Apis</i> | <i>Apis mellifera</i> |
| GBAH1825319  | <i>Apis</i> | <i>Apis mellifera</i> |
| GBHAP46114   | <i>Apis</i> | <i>Apis mellifera</i> |
| GBHAP75314   | <i>Apis</i> | <i>Apis mellifera</i> |
| GBHAP88914   | <i>Apis</i> | <i>Apis mellifera</i> |
| GBMIN1032812 | <i>Apis</i> | <i>Apis mellifera</i> |
| GBMIN1032912 | <i>Apis</i> | <i>Apis mellifera</i> |
| GBMIN1040412 | <i>Apis</i> | <i>Apis mellifera</i> |
| GBMIN1802213 | <i>Apis</i> | <i>Apis mellifera</i> |
| GBMIN1802313 | <i>Apis</i> | <i>Apis mellifera</i> |
| GBMIN1802413 | <i>Apis</i> | <i>Apis mellifera</i> |
| GBMIN1814913 | <i>Apis</i> | <i>Apis mellifera</i> |
| GBMIN1815013 | <i>Apis</i> | <i>Apis mellifera</i> |
| GBMIN3397613 | <i>Apis</i> | <i>Apis mellifera</i> |
| GBMIN3398513 | <i>Apis</i> | <i>Apis mellifera</i> |
| GBMIN3398613 | <i>Apis</i> | <i>Apis mellifera</i> |
| GBMIN7048317 | <i>Apis</i> | <i>Apis mellifera</i> |
| GBMIN7048417 | <i>Apis</i> | <i>Apis mellifera</i> |
| GBMIN7171617 | <i>Apis</i> | <i>Apis mellifera</i> |
| GBMIN7171717 | <i>Apis</i> | <i>Apis mellifera</i> |
| GBMIN7171817 | <i>Apis</i> | <i>Apis mellifera</i> |
| GBMIN7171917 | <i>Apis</i> | <i>Apis mellifera</i> |
| GBMIN7172017 | <i>Apis</i> | <i>Apis mellifera</i> |
| GBMIN7172117 | <i>Apis</i> | <i>Apis mellifera</i> |
| GBMIN7172217 | <i>Apis</i> | <i>Apis mellifera</i> |
| GBMIN7172317 | <i>Apis</i> | <i>Apis mellifera</i> |
| GBMIN7172417 | <i>Apis</i> | <i>Apis mellifera</i> |
| GBMIN7172517 | <i>Apis</i> | <i>Apis mellifera</i> |
| GBMIN7172617 | <i>Apis</i> | <i>Apis mellifera</i> |
| GBMIN7172717 | <i>Apis</i> | <i>Apis mellifera</i> |
| GBMIN7172817 | <i>Apis</i> | <i>Apis mellifera</i> |
| GBMIN7172917 | <i>Apis</i> | <i>Apis mellifera</i> |
| GBMIN7173017 | <i>Apis</i> | <i>Apis mellifera</i> |
| GBMIN7173117 | <i>Apis</i> | <i>Apis mellifera</i> |
| GBMIN7173217 | <i>Apis</i> | <i>Apis mellifera</i> |
| GBMIN7173317 | <i>Apis</i> | <i>Apis mellifera</i> |
| GBMIN7173417 | <i>Apis</i> | <i>Apis mellifera</i> |
| GBMIN7173517 | <i>Apis</i> | <i>Apis mellifera</i> |
| GBMIN7173617 | <i>Apis</i> | <i>Apis mellifera</i> |
| GBMIN7173717 | <i>Apis</i> | <i>Apis mellifera</i> |
| GBMIN7173817 | <i>Apis</i> | <i>Apis mellifera</i> |
| GBMIN7173917 | <i>Apis</i> | <i>Apis mellifera</i> |
| GBMIN7174017 | <i>Apis</i> | <i>Apis mellifera</i> |
| GBMIN7174117 | <i>Apis</i> | <i>Apis mellifera</i> |
| GBMIN7174217 | <i>Apis</i> | <i>Apis mellifera</i> |

|              |             |                       |
|--------------|-------------|-----------------------|
| GBMIN7174317 | <i>Apis</i> | <i>Apis mellifera</i> |
| GBMIN7174417 | <i>Apis</i> | <i>Apis mellifera</i> |
| GBMIN7174517 | <i>Apis</i> | <i>Apis mellifera</i> |
| GBMIN7174617 | <i>Apis</i> | <i>Apis mellifera</i> |
| GBMIN7174717 | <i>Apis</i> | <i>Apis mellifera</i> |
| GBMIN7174817 | <i>Apis</i> | <i>Apis mellifera</i> |
| GBMIN7174917 | <i>Apis</i> | <i>Apis mellifera</i> |
| GBMIN7175017 | <i>Apis</i> | <i>Apis mellifera</i> |
| GBMIN7175117 | <i>Apis</i> | <i>Apis mellifera</i> |
| GBMIN7175217 | <i>Apis</i> | <i>Apis mellifera</i> |
| GBMIN7175317 | <i>Apis</i> | <i>Apis mellifera</i> |
| GBMIN7175417 | <i>Apis</i> | <i>Apis mellifera</i> |
| GBMIN7175517 | <i>Apis</i> | <i>Apis mellifera</i> |
| GBMIN7175617 | <i>Apis</i> | <i>Apis mellifera</i> |
| GBMIN7175717 | <i>Apis</i> | <i>Apis mellifera</i> |
| GBMIN7175817 | <i>Apis</i> | <i>Apis mellifera</i> |
| GBMIN7175917 | <i>Apis</i> | <i>Apis mellifera</i> |
| GBMIN7176017 | <i>Apis</i> | <i>Apis mellifera</i> |
| GBMIN7176117 | <i>Apis</i> | <i>Apis mellifera</i> |
| GBMIN7176217 | <i>Apis</i> | <i>Apis mellifera</i> |
| GBMIN7176317 | <i>Apis</i> | <i>Apis mellifera</i> |
| GBMIN7176417 | <i>Apis</i> | <i>Apis mellifera</i> |
| GBMIN7176517 | <i>Apis</i> | <i>Apis mellifera</i> |
| GBMIN7176617 | <i>Apis</i> | <i>Apis mellifera</i> |
| GBMIN7176717 | <i>Apis</i> | <i>Apis mellifera</i> |
| GBMIN7176817 | <i>Apis</i> | <i>Apis mellifera</i> |
| GBMIN7176917 | <i>Apis</i> | <i>Apis mellifera</i> |
| GBMIN7177017 | <i>Apis</i> | <i>Apis mellifera</i> |
| GBMIN7177117 | <i>Apis</i> | <i>Apis mellifera</i> |
| GBMIN7177217 | <i>Apis</i> | <i>Apis mellifera</i> |
| GBMIN7177317 | <i>Apis</i> | <i>Apis mellifera</i> |
| GBMIN7177417 | <i>Apis</i> | <i>Apis mellifera</i> |
| GBMIN7177517 | <i>Apis</i> | <i>Apis mellifera</i> |
| GBMIN7177617 | <i>Apis</i> | <i>Apis mellifera</i> |
| GBMIN7177717 | <i>Apis</i> | <i>Apis mellifera</i> |
| GBMIN7177817 | <i>Apis</i> | <i>Apis mellifera</i> |
| GBMIN7177917 | <i>Apis</i> | <i>Apis mellifera</i> |
| GBMIN7178017 | <i>Apis</i> | <i>Apis mellifera</i> |
| GBMIN7178117 | <i>Apis</i> | <i>Apis mellifera</i> |
| GBMIN7178217 | <i>Apis</i> | <i>Apis mellifera</i> |
| GBMIN7178317 | <i>Apis</i> | <i>Apis mellifera</i> |
| GBMIN7178417 | <i>Apis</i> | <i>Apis mellifera</i> |
| GBMIN7178517 | <i>Apis</i> | <i>Apis mellifera</i> |
| GBMIN7178617 | <i>Apis</i> | <i>Apis mellifera</i> |
| GBMIN7178717 | <i>Apis</i> | <i>Apis mellifera</i> |
| GBMIN7178817 | <i>Apis</i> | <i>Apis mellifera</i> |

|              |             |                       |
|--------------|-------------|-----------------------|
| GBMIN7178917 | <i>Apis</i> | <i>Apis mellifera</i> |
| GBMIN7179017 | <i>Apis</i> | <i>Apis mellifera</i> |
| GBMIN7179117 | <i>Apis</i> | <i>Apis mellifera</i> |
| GBMIN7179217 | <i>Apis</i> | <i>Apis mellifera</i> |
| GBMIN7179317 | <i>Apis</i> | <i>Apis mellifera</i> |
| GBMIN7179417 | <i>Apis</i> | <i>Apis mellifera</i> |
| GBMIN7179517 | <i>Apis</i> | <i>Apis mellifera</i> |
| GBMIN7179617 | <i>Apis</i> | <i>Apis mellifera</i> |
| GBMIN7179717 | <i>Apis</i> | <i>Apis mellifera</i> |
| GBMIN7179817 | <i>Apis</i> | <i>Apis mellifera</i> |
| GBMIN7179917 | <i>Apis</i> | <i>Apis mellifera</i> |
| GBMIN7180017 | <i>Apis</i> | <i>Apis mellifera</i> |
| GBMIN7180117 | <i>Apis</i> | <i>Apis mellifera</i> |
| GBMIN7180217 | <i>Apis</i> | <i>Apis mellifera</i> |
| GBMIN7180317 | <i>Apis</i> | <i>Apis mellifera</i> |
| GBMIN7180417 | <i>Apis</i> | <i>Apis mellifera</i> |
| GBMIN7180517 | <i>Apis</i> | <i>Apis mellifera</i> |
| GBMIN7180617 | <i>Apis</i> | <i>Apis mellifera</i> |
| GBMIN7180717 | <i>Apis</i> | <i>Apis mellifera</i> |
| GBMIN7180817 | <i>Apis</i> | <i>Apis mellifera</i> |
| GBMIN7180917 | <i>Apis</i> | <i>Apis mellifera</i> |
| GBMIN7181017 | <i>Apis</i> | <i>Apis mellifera</i> |
| GBMIN7181117 | <i>Apis</i> | <i>Apis mellifera</i> |
| GBMIN7181217 | <i>Apis</i> | <i>Apis mellifera</i> |
| GBMIN7181317 | <i>Apis</i> | <i>Apis mellifera</i> |
| GBMIN7181417 | <i>Apis</i> | <i>Apis mellifera</i> |
| GBMIN7181517 | <i>Apis</i> | <i>Apis mellifera</i> |
| GBMIN7181617 | <i>Apis</i> | <i>Apis mellifera</i> |
| GBMIN7181717 | <i>Apis</i> | <i>Apis mellifera</i> |
| GBMIN7181817 | <i>Apis</i> | <i>Apis mellifera</i> |
| GBMIN7181917 | <i>Apis</i> | <i>Apis mellifera</i> |
| GBMIN7182017 | <i>Apis</i> | <i>Apis mellifera</i> |
| GBMIN7182117 | <i>Apis</i> | <i>Apis mellifera</i> |
| GBMIN7182217 | <i>Apis</i> | <i>Apis mellifera</i> |
| GBMIN7182317 | <i>Apis</i> | <i>Apis mellifera</i> |
| GBMIN7182417 | <i>Apis</i> | <i>Apis mellifera</i> |
| GBMIN7182517 | <i>Apis</i> | <i>Apis mellifera</i> |
| GBMIN7182617 | <i>Apis</i> | <i>Apis mellifera</i> |
| GBMIN7182717 | <i>Apis</i> | <i>Apis mellifera</i> |
| GBMIN7182817 | <i>Apis</i> | <i>Apis mellifera</i> |
| GBMIN7182917 | <i>Apis</i> | <i>Apis mellifera</i> |
| GBMIN7183017 | <i>Apis</i> | <i>Apis mellifera</i> |
| GBMIN778412  | <i>Apis</i> | <i>Apis mellifera</i> |
| GBMNA1775319 | <i>Apis</i> | <i>Apis mellifera</i> |
| GBMNA1831019 | <i>Apis</i> | <i>Apis mellifera</i> |
| GBMNA1831119 | <i>Apis</i> | <i>Apis mellifera</i> |

|              |             |                       |
|--------------|-------------|-----------------------|
| GBMNA1831219 | <i>Apis</i> | <i>Apis mellifera</i> |
| GBMNA1831319 | <i>Apis</i> | <i>Apis mellifera</i> |
| GBMNA1831419 | <i>Apis</i> | <i>Apis mellifera</i> |
| GBMNA1831519 | <i>Apis</i> | <i>Apis mellifera</i> |
| GBMNA1831619 | <i>Apis</i> | <i>Apis mellifera</i> |
| GBMNA1831719 | <i>Apis</i> | <i>Apis mellifera</i> |
| GBMNA1831819 | <i>Apis</i> | <i>Apis mellifera</i> |
| GBMNA1831919 | <i>Apis</i> | <i>Apis mellifera</i> |
| GBMNA1832019 | <i>Apis</i> | <i>Apis mellifera</i> |
| GBMNA1832119 | <i>Apis</i> | <i>Apis mellifera</i> |
| GBMNA1832219 | <i>Apis</i> | <i>Apis mellifera</i> |
| GBMNA1832319 | <i>Apis</i> | <i>Apis mellifera</i> |
| GBMNA1832419 | <i>Apis</i> | <i>Apis mellifera</i> |
| GBMNA1832519 | <i>Apis</i> | <i>Apis mellifera</i> |
| GBMNA1832719 | <i>Apis</i> | <i>Apis mellifera</i> |
| GBMNA1832819 | <i>Apis</i> | <i>Apis mellifera</i> |
| GBMNA1832919 | <i>Apis</i> | <i>Apis mellifera</i> |
| GBMNA1833019 | <i>Apis</i> | <i>Apis mellifera</i> |
| GBMNA1833119 | <i>Apis</i> | <i>Apis mellifera</i> |
| GBMNA1833219 | <i>Apis</i> | <i>Apis mellifera</i> |
| GBMNA1899019 | <i>Apis</i> | <i>Apis mellifera</i> |
| GBMNA1899119 | <i>Apis</i> | <i>Apis mellifera</i> |
| GBMNA2182619 | <i>Apis</i> | <i>Apis mellifera</i> |
| GBMNA2299719 | <i>Apis</i> | <i>Apis mellifera</i> |
| GBMNA2299819 | <i>Apis</i> | <i>Apis mellifera</i> |
| GBMNA3660119 | <i>Apis</i> | <i>Apis mellifera</i> |
| GBMNA996719  | <i>Apis</i> | <i>Apis mellifera</i> |
| GBMNB6126220 | <i>Apis</i> | <i>Apis mellifera</i> |
| GBMNB6163220 | <i>Apis</i> | <i>Apis mellifera</i> |
| GBMNB6286220 | <i>Apis</i> | <i>Apis mellifera</i> |
| GBMNB6286320 | <i>Apis</i> | <i>Apis mellifera</i> |
| GBMNB6286420 | <i>Apis</i> | <i>Apis mellifera</i> |
| GBMNB6286520 | <i>Apis</i> | <i>Apis mellifera</i> |
| GBMNB6286620 | <i>Apis</i> | <i>Apis mellifera</i> |
| GBMNB6286720 | <i>Apis</i> | <i>Apis mellifera</i> |
| GBMNB6286820 | <i>Apis</i> | <i>Apis mellifera</i> |
| GBMNB6286920 | <i>Apis</i> | <i>Apis mellifera</i> |
| GBMNB6287020 | <i>Apis</i> | <i>Apis mellifera</i> |
| GBMNB6287120 | <i>Apis</i> | <i>Apis mellifera</i> |
| GBMNB6287220 | <i>Apis</i> | <i>Apis mellifera</i> |
| GBMNB6287320 | <i>Apis</i> | <i>Apis mellifera</i> |
| GBMNB6287420 | <i>Apis</i> | <i>Apis mellifera</i> |
| GBMNB6287520 | <i>Apis</i> | <i>Apis mellifera</i> |
| GBMNB6287620 | <i>Apis</i> | <i>Apis mellifera</i> |
| GBMNB6287720 | <i>Apis</i> | <i>Apis mellifera</i> |
| GBMNB6287820 | <i>Apis</i> | <i>Apis mellifera</i> |

|              |             |                       |
|--------------|-------------|-----------------------|
| GBMNB6287920 | <i>Apis</i> | <i>Apis mellifera</i> |
| GBMNB6288020 | <i>Apis</i> | <i>Apis mellifera</i> |
| GBMNB6288120 | <i>Apis</i> | <i>Apis mellifera</i> |
| GBMNB6288220 | <i>Apis</i> | <i>Apis mellifera</i> |
| GBMNB6288320 | <i>Apis</i> | <i>Apis mellifera</i> |
| GBMNB6288420 | <i>Apis</i> | <i>Apis mellifera</i> |
| GBMNB6288520 | <i>Apis</i> | <i>Apis mellifera</i> |
| GBMNB6288620 | <i>Apis</i> | <i>Apis mellifera</i> |
| GBMNB6288720 | <i>Apis</i> | <i>Apis mellifera</i> |
| GBMNB6288820 | <i>Apis</i> | <i>Apis mellifera</i> |
| GBMNB6288920 | <i>Apis</i> | <i>Apis mellifera</i> |
| GBMNB6289020 | <i>Apis</i> | <i>Apis mellifera</i> |
| GBMNB6289120 | <i>Apis</i> | <i>Apis mellifera</i> |
| GBMNB6289220 | <i>Apis</i> | <i>Apis mellifera</i> |
| GBMNB6289320 | <i>Apis</i> | <i>Apis mellifera</i> |
| GBMNB6289420 | <i>Apis</i> | <i>Apis mellifera</i> |
| GBMNB6289520 | <i>Apis</i> | <i>Apis mellifera</i> |
| GBMNB6289620 | <i>Apis</i> | <i>Apis mellifera</i> |
| GBMNB6289720 | <i>Apis</i> | <i>Apis mellifera</i> |
| GBMNB6289820 | <i>Apis</i> | <i>Apis mellifera</i> |
| GBMNB6289920 | <i>Apis</i> | <i>Apis mellifera</i> |
| GBMNB6290020 | <i>Apis</i> | <i>Apis mellifera</i> |
| GBMNB6290120 | <i>Apis</i> | <i>Apis mellifera</i> |
| GBMNB6290220 | <i>Apis</i> | <i>Apis mellifera</i> |
| GBMNB6290320 | <i>Apis</i> | <i>Apis mellifera</i> |
| GBMNB6290420 | <i>Apis</i> | <i>Apis mellifera</i> |
| GBMNB6290520 | <i>Apis</i> | <i>Apis mellifera</i> |
| GBMNB6290620 | <i>Apis</i> | <i>Apis mellifera</i> |
| GBMNB6290720 | <i>Apis</i> | <i>Apis mellifera</i> |
| GBMNB6290820 | <i>Apis</i> | <i>Apis mellifera</i> |
| GBMNB6290920 | <i>Apis</i> | <i>Apis mellifera</i> |
| GBMNB6291020 | <i>Apis</i> | <i>Apis mellifera</i> |
| GBMNB6291120 | <i>Apis</i> | <i>Apis mellifera</i> |
| GBMNB6291220 | <i>Apis</i> | <i>Apis mellifera</i> |
| GBMNB6291320 | <i>Apis</i> | <i>Apis mellifera</i> |
| GBMNB6291420 | <i>Apis</i> | <i>Apis mellifera</i> |
| GBMNB6291520 | <i>Apis</i> | <i>Apis mellifera</i> |
| GBMNB6291620 | <i>Apis</i> | <i>Apis mellifera</i> |
| GBMNB6291720 | <i>Apis</i> | <i>Apis mellifera</i> |
| GBMNB6291820 | <i>Apis</i> | <i>Apis mellifera</i> |
| GBMNB6291920 | <i>Apis</i> | <i>Apis mellifera</i> |
| GBMNB6292020 | <i>Apis</i> | <i>Apis mellifera</i> |
| GBMNB6292120 | <i>Apis</i> | <i>Apis mellifera</i> |
| GBMNB6292220 | <i>Apis</i> | <i>Apis mellifera</i> |
| GBMNB6292320 | <i>Apis</i> | <i>Apis mellifera</i> |
| GBMNB6292420 | <i>Apis</i> | <i>Apis mellifera</i> |



|              |             |                       |
|--------------|-------------|-----------------------|
| GBMNB6292520 | <i>Apis</i> | <i>Apis mellifera</i> |
| GBMNB6292620 | <i>Apis</i> | <i>Apis mellifera</i> |
| GBMNB6292720 | <i>Apis</i> | <i>Apis mellifera</i> |
| GBMNB6292820 | <i>Apis</i> | <i>Apis mellifera</i> |
| GBMNB6292920 | <i>Apis</i> | <i>Apis mellifera</i> |
| GBMNB6293020 | <i>Apis</i> | <i>Apis mellifera</i> |
| GBMNB6293120 | <i>Apis</i> | <i>Apis mellifera</i> |
| GBMNB6293220 | <i>Apis</i> | <i>Apis mellifera</i> |
| GBMNB6293320 | <i>Apis</i> | <i>Apis mellifera</i> |
| GBMNB6293420 | <i>Apis</i> | <i>Apis mellifera</i> |
| GBMNB6293520 | <i>Apis</i> | <i>Apis mellifera</i> |
| GBMNB6293620 | <i>Apis</i> | <i>Apis mellifera</i> |
| GBMNB6293720 | <i>Apis</i> | <i>Apis mellifera</i> |
| GBMNB6293820 | <i>Apis</i> | <i>Apis mellifera</i> |
| GBMNB6293920 | <i>Apis</i> | <i>Apis mellifera</i> |
| GBMNB6294020 | <i>Apis</i> | <i>Apis mellifera</i> |
| GBMNB6294120 | <i>Apis</i> | <i>Apis mellifera</i> |
| GBMNB6294220 | <i>Apis</i> | <i>Apis mellifera</i> |
| GBMNB6294320 | <i>Apis</i> | <i>Apis mellifera</i> |
| GBMNB6294420 | <i>Apis</i> | <i>Apis mellifera</i> |
| GBMNB6294520 | <i>Apis</i> | <i>Apis mellifera</i> |
| GBMNB6294620 | <i>Apis</i> | <i>Apis mellifera</i> |
| GBMNB6294720 | <i>Apis</i> | <i>Apis mellifera</i> |
| GBMNB6294820 | <i>Apis</i> | <i>Apis mellifera</i> |
| GBMTG06316   | <i>Apis</i> | <i>Apis mellifera</i> |
| GMC RJ03213  | <i>Apis</i> | <i>Apis mellifera</i> |
| GMC RV31014  | <i>Apis</i> | <i>Apis mellifera</i> |
| GMC WD01615  | <i>Apis</i> | <i>Apis mellifera</i> |
| GMC WJ13015  | <i>Apis</i> | <i>Apis mellifera</i> |
| GMC WK03415  | <i>Apis</i> | <i>Apis mellifera</i> |
| GMC WL81015  | <i>Apis</i> | <i>Apis mellifera</i> |
| GMC WN03915  | <i>Apis</i> | <i>Apis mellifera</i> |
| GMC WS10115  | <i>Apis</i> | <i>Apis mellifera</i> |
| GME GB15314  | <i>Apis</i> | <i>Apis mellifera</i> |
| GME GF00514  | <i>Apis</i> | <i>Apis mellifera</i> |
| GME SD00814  | <i>Apis</i> | <i>Apis mellifera</i> |
| GME SD00914  | <i>Apis</i> | <i>Apis mellifera</i> |
| GME SG04314  | <i>Apis</i> | <i>Apis mellifera</i> |
| GME SL05114  | <i>Apis</i> | <i>Apis mellifera</i> |
| GMG MA39614  | <i>Apis</i> | <i>Apis mellifera</i> |
| GMG MA42714  | <i>Apis</i> | <i>Apis mellifera</i> |
| GMG MA45214  | <i>Apis</i> | <i>Apis mellifera</i> |
| GMG MA46614  | <i>Apis</i> | <i>Apis mellifera</i> |
| GMG MA46714  | <i>Apis</i> | <i>Apis mellifera</i> |
| GMG MA46814  | <i>Apis</i> | <i>Apis mellifera</i> |
| GMG MA47114  | <i>Apis</i> | <i>Apis mellifera</i> |

|            |             |                       |
|------------|-------------|-----------------------|
| GMGMA47314 | <i>Apis</i> | <i>Apis mellifera</i> |
| GMGMA47614 | <i>Apis</i> | <i>Apis mellifera</i> |
| GMGMA54014 | <i>Apis</i> | <i>Apis mellifera</i> |
| GMGMA54314 | <i>Apis</i> | <i>Apis mellifera</i> |
| GMGMA54714 | <i>Apis</i> | <i>Apis mellifera</i> |
| GMGMA55114 | <i>Apis</i> | <i>Apis mellifera</i> |
| GMGMA55914 | <i>Apis</i> | <i>Apis mellifera</i> |
| GMGMA56014 | <i>Apis</i> | <i>Apis mellifera</i> |
| GMGMA59014 | <i>Apis</i> | <i>Apis mellifera</i> |
| GMGMA59414 | <i>Apis</i> | <i>Apis mellifera</i> |
| GMGMA59914 | <i>Apis</i> | <i>Apis mellifera</i> |
| GMGMA61414 | <i>Apis</i> | <i>Apis mellifera</i> |
| GMGMB51914 | <i>Apis</i> | <i>Apis mellifera</i> |
| GMGMB53114 | <i>Apis</i> | <i>Apis mellifera</i> |
| GMGMC15114 | <i>Apis</i> | <i>Apis mellifera</i> |
| GMGMC15414 | <i>Apis</i> | <i>Apis mellifera</i> |
| GMGMC17314 | <i>Apis</i> | <i>Apis mellifera</i> |
| GMGMC18314 | <i>Apis</i> | <i>Apis mellifera</i> |
| GMGMC20814 | <i>Apis</i> | <i>Apis mellifera</i> |
| GMGMD16814 | <i>Apis</i> | <i>Apis mellifera</i> |
| GMGME12014 | <i>Apis</i> | <i>Apis mellifera</i> |
| GMGME12614 | <i>Apis</i> | <i>Apis mellifera</i> |
| GMGMI08214 | <i>Apis</i> | <i>Apis mellifera</i> |
| GMGMI09414 | <i>Apis</i> | <i>Apis mellifera</i> |
| GMGMK08114 | <i>Apis</i> | <i>Apis mellifera</i> |
| GMGMK11314 | <i>Apis</i> | <i>Apis mellifera</i> |
| GMGMK16014 | <i>Apis</i> | <i>Apis mellifera</i> |
| GMGMK16614 | <i>Apis</i> | <i>Apis mellifera</i> |
| GMGMK35614 | <i>Apis</i> | <i>Apis mellifera</i> |
| GMGMK35714 | <i>Apis</i> | <i>Apis mellifera</i> |
| GMGMK35914 | <i>Apis</i> | <i>Apis mellifera</i> |
| GMGML12214 | <i>Apis</i> | <i>Apis mellifera</i> |
| GMGML12514 | <i>Apis</i> | <i>Apis mellifera</i> |
| GMGML14514 | <i>Apis</i> | <i>Apis mellifera</i> |
| GMGML14614 | <i>Apis</i> | <i>Apis mellifera</i> |
| GMGML15414 | <i>Apis</i> | <i>Apis mellifera</i> |
| GMGML15914 | <i>Apis</i> | <i>Apis mellifera</i> |
| GMGMM14314 | <i>Apis</i> | <i>Apis mellifera</i> |
| GMGMM15314 | <i>Apis</i> | <i>Apis mellifera</i> |
| GMGMN00214 | <i>Apis</i> | <i>Apis mellifera</i> |
| GMGMN14814 | <i>Apis</i> | <i>Apis mellifera</i> |
| GMGMN15814 | <i>Apis</i> | <i>Apis mellifera</i> |
| GMGMN18514 | <i>Apis</i> | <i>Apis mellifera</i> |
| GMGMN18614 | <i>Apis</i> | <i>Apis mellifera</i> |
| GMGMN27114 | <i>Apis</i> | <i>Apis mellifera</i> |
| GMGMN27214 | <i>Apis</i> | <i>Apis mellifera</i> |

|             |             |                       |
|-------------|-------------|-----------------------|
| GMGMN27314  | <i>Apis</i> | <i>Apis mellifera</i> |
| GMGMN27414  | <i>Apis</i> | <i>Apis mellifera</i> |
| GMGMN27714  | <i>Apis</i> | <i>Apis mellifera</i> |
| GMGMN28114  | <i>Apis</i> | <i>Apis mellifera</i> |
| GMGMN28214  | <i>Apis</i> | <i>Apis mellifera</i> |
| GMGMN28314  | <i>Apis</i> | <i>Apis mellifera</i> |
| GMGMN28414  | <i>Apis</i> | <i>Apis mellifera</i> |
| GMGMN28514  | <i>Apis</i> | <i>Apis mellifera</i> |
| GMGMN28614  | <i>Apis</i> | <i>Apis mellifera</i> |
| GMGMN28714  | <i>Apis</i> | <i>Apis mellifera</i> |
| GMGMN28814  | <i>Apis</i> | <i>Apis mellifera</i> |
| GMGMN28914  | <i>Apis</i> | <i>Apis mellifera</i> |
| GMGMN29014  | <i>Apis</i> | <i>Apis mellifera</i> |
| GMGMN29514  | <i>Apis</i> | <i>Apis mellifera</i> |
| GMGMN29614  | <i>Apis</i> | <i>Apis mellifera</i> |
| GMGMN29914  | <i>Apis</i> | <i>Apis mellifera</i> |
| GMGRF561013 | <i>Apis</i> | <i>Apis mellifera</i> |
| GMGRF561113 | <i>Apis</i> | <i>Apis mellifera</i> |
| GMGRF561213 | <i>Apis</i> | <i>Apis mellifera</i> |
| GMGRF561313 | <i>Apis</i> | <i>Apis mellifera</i> |
| GMGRF561413 | <i>Apis</i> | <i>Apis mellifera</i> |
| GMGRF561513 | <i>Apis</i> | <i>Apis mellifera</i> |
| GMGRF562813 | <i>Apis</i> | <i>Apis mellifera</i> |
| GMGRF562913 | <i>Apis</i> | <i>Apis mellifera</i> |
| GMGRF563113 | <i>Apis</i> | <i>Apis mellifera</i> |
| GMHDL126513 | <i>Apis</i> | <i>Apis mellifera</i> |
| GMHGG23913  | <i>Apis</i> | <i>Apis mellifera</i> |
| GMHMA55415  | <i>Apis</i> | <i>Apis mellifera</i> |
| GMHMA55515  | <i>Apis</i> | <i>Apis mellifera</i> |
| GMHMA55615  | <i>Apis</i> | <i>Apis mellifera</i> |
| GMHMA55715  | <i>Apis</i> | <i>Apis mellifera</i> |
| GMHMA55815  | <i>Apis</i> | <i>Apis mellifera</i> |
| GMHMA55915  | <i>Apis</i> | <i>Apis mellifera</i> |
| GMHMH01915  | <i>Apis</i> | <i>Apis mellifera</i> |
| GMHMH02215  | <i>Apis</i> | <i>Apis mellifera</i> |
| GMHMJ00115  | <i>Apis</i> | <i>Apis mellifera</i> |
| GMHML03816  | <i>Apis</i> | <i>Apis mellifera</i> |
| GMHMN02116  | <i>Apis</i> | <i>Apis mellifera</i> |
| GMHMP01115  | <i>Apis</i> | <i>Apis mellifera</i> |
| GMHMQ01215  | <i>Apis</i> | <i>Apis mellifera</i> |
| GMHMQ03315  | <i>Apis</i> | <i>Apis mellifera</i> |
| GMHMQ03615  | <i>Apis</i> | <i>Apis mellifera</i> |
| GMHMQ03715  | <i>Apis</i> | <i>Apis mellifera</i> |
| GMMCD05214  | <i>Apis</i> | <i>Apis mellifera</i> |
| GMMDA07715  | <i>Apis</i> | <i>Apis mellifera</i> |
| GMMDB08615  | <i>Apis</i> | <i>Apis mellifera</i> |

|             |             |                       |
|-------------|-------------|-----------------------|
| GMMDB09915  | <i>Apis</i> | <i>Apis mellifera</i> |
| GMMDG08215  | <i>Apis</i> | <i>Apis mellifera</i> |
| GMOEF25615  | <i>Apis</i> | <i>Apis mellifera</i> |
| GMOEF25915  | <i>Apis</i> | <i>Apis mellifera</i> |
| GMRAB01614  | <i>Apis</i> | <i>Apis mellifera</i> |
| GMRMK20614  | <i>Apis</i> | <i>Apis mellifera</i> |
| GMRMM20714  | <i>Apis</i> | <i>Apis mellifera</i> |
| GMRMN04314  | <i>Apis</i> | <i>Apis mellifera</i> |
| GMRMP04814  | <i>Apis</i> | <i>Apis mellifera</i> |
| GMRMV00114  | <i>Apis</i> | <i>Apis mellifera</i> |
| GMSAF112613 | <i>Apis</i> | <i>Apis mellifera</i> |
| GMSAR07213  | <i>Apis</i> | <i>Apis mellifera</i> |
| GMSUE64314  | <i>Apis</i> | <i>Apis mellifera</i> |
| GMSUH08315  | <i>Apis</i> | <i>Apis mellifera</i> |
| GTENK02411  | <i>Apis</i> | <i>Apis mellifera</i> |
| HDBNS23505  | <i>Apis</i> | <i>Apis mellifera</i> |
| HDBNS23605  | <i>Apis</i> | <i>Apis mellifera</i> |
| HDBNS23705  | <i>Apis</i> | <i>Apis mellifera</i> |
| HDBNS23805  | <i>Apis</i> | <i>Apis mellifera</i> |
| HDBNS23905  | <i>Apis</i> | <i>Apis mellifera</i> |
| HEOCT102012 | <i>Apis</i> | <i>Apis mellifera</i> |
| HGPPH08610  | <i>Apis</i> | <i>Apis mellifera</i> |
| HPPPK113213 | <i>Apis</i> | <i>Apis mellifera</i> |
| HVFW26819   | <i>Apis</i> | <i>Apis mellifera</i> |
| HYAS127112  | <i>Apis</i> | <i>Apis mellifera</i> |
| HYAS131412  | <i>Apis</i> | <i>Apis mellifera</i> |
| HYAS132912  | <i>Apis</i> | <i>Apis mellifera</i> |
| HYAS140212  | <i>Apis</i> | <i>Apis mellifera</i> |
| HYAS19311   | <i>Apis</i> | <i>Apis mellifera</i> |
| HYAT29411   | <i>Apis</i> | <i>Apis mellifera</i> |
| HYAT29711   | <i>Apis</i> | <i>Apis mellifera</i> |
| HYAT29811   | <i>Apis</i> | <i>Apis mellifera</i> |
| HYAT30211   | <i>Apis</i> | <i>Apis mellifera</i> |
| HYAT31411   | <i>Apis</i> | <i>Apis mellifera</i> |
| HYMBB10809  | <i>Apis</i> | <i>Apis mellifera</i> |
| HYMBB10909  | <i>Apis</i> | <i>Apis mellifera</i> |
| HYMBB11009  | <i>Apis</i> | <i>Apis mellifera</i> |
| HYMBB11109  | <i>Apis</i> | <i>Apis mellifera</i> |
| HYMBB11209  | <i>Apis</i> | <i>Apis mellifera</i> |
| HYMBB11309  | <i>Apis</i> | <i>Apis mellifera</i> |
| HYMBB11409  | <i>Apis</i> | <i>Apis mellifera</i> |
| HYMBB30609  | <i>Apis</i> | <i>Apis mellifera</i> |
| HYMBB31209  | <i>Apis</i> | <i>Apis mellifera</i> |
| HYQT06308   | <i>Apis</i> | <i>Apis mellifera</i> |
| HYQT24409   | <i>Apis</i> | <i>Apis mellifera</i> |
| HYQT24709   | <i>Apis</i> | <i>Apis mellifera</i> |

|             |             |                       |
|-------------|-------------|-----------------------|
| HYQT24809   | <i>Apis</i> | <i>Apis mellifera</i> |
| HYSAF17112  | <i>Apis</i> | <i>Apis mellifera</i> |
| INFL02208   | <i>Apis</i> | <i>Apis mellifera</i> |
| JCCCA10316  | <i>Apis</i> | <i>Apis mellifera</i> |
| JICCR12016  | <i>Apis</i> | <i>Apis mellifera</i> |
| JSHYN24211  | <i>Apis</i> | <i>Apis mellifera</i> |
| JSHYN33111  | <i>Apis</i> | <i>Apis mellifera</i> |
| JSHYP78012  | <i>Apis</i> | <i>Apis mellifera</i> |
| JSJUN203111 | <i>Apis</i> | <i>Apis mellifera</i> |
| JSJUN203211 | <i>Apis</i> | <i>Apis mellifera</i> |
| MBIOP80214  | <i>Apis</i> | <i>Apis mellifera</i> |
| MCCAA143512 | <i>Apis</i> | <i>Apis mellifera</i> |
| MCCAA143612 | <i>Apis</i> | <i>Apis mellifera</i> |
| MCCAA143712 | <i>Apis</i> | <i>Apis mellifera</i> |
| MCCAA143812 | <i>Apis</i> | <i>Apis mellifera</i> |
| MCCAA143912 | <i>Apis</i> | <i>Apis mellifera</i> |
| MCCAA144012 | <i>Apis</i> | <i>Apis mellifera</i> |
| MOBIL91915  | <i>Apis</i> | <i>Apis mellifera</i> |
| NBINS16614  | <i>Apis</i> | <i>Apis mellifera</i> |
| NBINS35915  | <i>Apis</i> | <i>Apis mellifera</i> |
| NBINS40215  | <i>Apis</i> | <i>Apis mellifera</i> |
| NBINS41315  | <i>Apis</i> | <i>Apis mellifera</i> |
| NCCC68211   | <i>Apis</i> | <i>Apis mellifera</i> |
| NGAAC206314 | <i>Apis</i> | <i>Apis mellifera</i> |
| NGAAC207214 | <i>Apis</i> | <i>Apis mellifera</i> |
| NGAAC209114 | <i>Apis</i> | <i>Apis mellifera</i> |
| NGNAF07613  | <i>Apis</i> | <i>Apis mellifera</i> |
| NGNAJ00513  | <i>Apis</i> | <i>Apis mellifera</i> |
| NSWHO292918 | <i>Apis</i> | <i>Apis mellifera</i> |
| NSWHO402018 | <i>Apis</i> | <i>Apis mellifera</i> |
| OPPEI417017 | <i>Apis</i> | <i>Apis mellifera</i> |
| OPPQM05617  | <i>Apis</i> | <i>Apis mellifera</i> |
| OUHY01909   | <i>Apis</i> | <i>Apis mellifera</i> |
| OUHY02009   | <i>Apis</i> | <i>Apis mellifera</i> |
| OUHY02109   | <i>Apis</i> | <i>Apis mellifera</i> |
| OUHY02209   | <i>Apis</i> | <i>Apis mellifera</i> |
| PASEP43612  | <i>Apis</i> | <i>Apis mellifera</i> |
| PHMTX00111  | <i>Apis</i> | <i>Apis mellifera</i> |
| PHOCT92111  | <i>Apis</i> | <i>Apis mellifera</i> |
| PHOCT92411  | <i>Apis</i> | <i>Apis mellifera</i> |
| PHOCT92611  | <i>Apis</i> | <i>Apis mellifera</i> |
| PHSEP203511 | <i>Apis</i> | <i>Apis mellifera</i> |
| PIMA11519   | <i>Apis</i> | <i>Apis mellifera</i> |
| POBGD09815  | <i>Apis</i> | <i>Apis mellifera</i> |
| POLLE110619 | <i>Apis</i> | <i>Apis mellifera</i> |
| POLLE111519 | <i>Apis</i> | <i>Apis mellifera</i> |

|             |             |                       |
|-------------|-------------|-----------------------|
| POLLE115819 | <i>Apis</i> | <i>Apis mellifera</i> |
| POLLE118919 | <i>Apis</i> | <i>Apis mellifera</i> |
| POLLE119519 | <i>Apis</i> | <i>Apis mellifera</i> |
| POLLE119619 | <i>Apis</i> | <i>Apis mellifera</i> |
| POLLE119719 | <i>Apis</i> | <i>Apis mellifera</i> |
| POLLE121719 | <i>Apis</i> | <i>Apis mellifera</i> |
| POLLE123319 | <i>Apis</i> | <i>Apis mellifera</i> |
| POLLE123519 | <i>Apis</i> | <i>Apis mellifera</i> |
| POLLE124419 | <i>Apis</i> | <i>Apis mellifera</i> |
| POLLE130119 | <i>Apis</i> | <i>Apis mellifera</i> |
| POLLE130219 | <i>Apis</i> | <i>Apis mellifera</i> |
| POLLE130319 | <i>Apis</i> | <i>Apis mellifera</i> |
| POLLE131219 | <i>Apis</i> | <i>Apis mellifera</i> |
| POLLE131419 | <i>Apis</i> | <i>Apis mellifera</i> |
| POLLE137919 | <i>Apis</i> | <i>Apis mellifera</i> |
| POLLE138019 | <i>Apis</i> | <i>Apis mellifera</i> |
| POLLE138819 | <i>Apis</i> | <i>Apis mellifera</i> |
| POLLE139719 | <i>Apis</i> | <i>Apis mellifera</i> |
| POLLE139819 | <i>Apis</i> | <i>Apis mellifera</i> |
| POLLE143619 | <i>Apis</i> | <i>Apis mellifera</i> |
| POLLE144419 | <i>Apis</i> | <i>Apis mellifera</i> |
| POLLE144619 | <i>Apis</i> | <i>Apis mellifera</i> |
| POLLE145319 | <i>Apis</i> | <i>Apis mellifera</i> |
| POLLE145419 | <i>Apis</i> | <i>Apis mellifera</i> |
| POLLE145519 | <i>Apis</i> | <i>Apis mellifera</i> |
| POLLE146719 | <i>Apis</i> | <i>Apis mellifera</i> |
| POLLE147519 | <i>Apis</i> | <i>Apis mellifera</i> |
| POLLE148019 | <i>Apis</i> | <i>Apis mellifera</i> |
| POLLE149019 | <i>Apis</i> | <i>Apis mellifera</i> |
| POLLE149619 | <i>Apis</i> | <i>Apis mellifera</i> |
| POLLE149819 | <i>Apis</i> | <i>Apis mellifera</i> |
| POLLE149919 | <i>Apis</i> | <i>Apis mellifera</i> |
| POLLE152519 | <i>Apis</i> | <i>Apis mellifera</i> |
| POLLE153619 | <i>Apis</i> | <i>Apis mellifera</i> |
| POLLE160619 | <i>Apis</i> | <i>Apis mellifera</i> |
| POLLE160719 | <i>Apis</i> | <i>Apis mellifera</i> |
| POLLE163619 | <i>Apis</i> | <i>Apis mellifera</i> |
| POLLE164119 | <i>Apis</i> | <i>Apis mellifera</i> |
| POLLE164619 | <i>Apis</i> | <i>Apis mellifera</i> |
| POLLE179119 | <i>Apis</i> | <i>Apis mellifera</i> |
| POLLE179219 | <i>Apis</i> | <i>Apis mellifera</i> |
| POLLE205819 | <i>Apis</i> | <i>Apis mellifera</i> |
| POLLE247419 | <i>Apis</i> | <i>Apis mellifera</i> |
| POLLE247619 | <i>Apis</i> | <i>Apis mellifera</i> |
| POLLE263719 | <i>Apis</i> | <i>Apis mellifera</i> |
| POLLE264019 | <i>Apis</i> | <i>Apis mellifera</i> |

|             |             |                       |
|-------------|-------------|-----------------------|
| POLLE264319 | <i>Apis</i> | <i>Apis mellifera</i> |
| POLLE264419 | <i>Apis</i> | <i>Apis mellifera</i> |
| POLLE265119 | <i>Apis</i> | <i>Apis mellifera</i> |
| POLLE265519 | <i>Apis</i> | <i>Apis mellifera</i> |
| POLLE265919 | <i>Apis</i> | <i>Apis mellifera</i> |
| POLLE266219 | <i>Apis</i> | <i>Apis mellifera</i> |
| POLLE266319 | <i>Apis</i> | <i>Apis mellifera</i> |
| POLLE266519 | <i>Apis</i> | <i>Apis mellifera</i> |
| POLLE266919 | <i>Apis</i> | <i>Apis mellifera</i> |
| POLLE267319 | <i>Apis</i> | <i>Apis mellifera</i> |
| POLLE267419 | <i>Apis</i> | <i>Apis mellifera</i> |
| POLLE267719 | <i>Apis</i> | <i>Apis mellifera</i> |
| POLLE267819 | <i>Apis</i> | <i>Apis mellifera</i> |
| POLLE267919 | <i>Apis</i> | <i>Apis mellifera</i> |
| POLLE268219 | <i>Apis</i> | <i>Apis mellifera</i> |
| POLLE268619 | <i>Apis</i> | <i>Apis mellifera</i> |
| POLLE268819 | <i>Apis</i> | <i>Apis mellifera</i> |
| POLLE269319 | <i>Apis</i> | <i>Apis mellifera</i> |
| POLLE269419 | <i>Apis</i> | <i>Apis mellifera</i> |
| POLLE269519 | <i>Apis</i> | <i>Apis mellifera</i> |
| POLLE269619 | <i>Apis</i> | <i>Apis mellifera</i> |
| POLLE271519 | <i>Apis</i> | <i>Apis mellifera</i> |
| POLLE271619 | <i>Apis</i> | <i>Apis mellifera</i> |
| POLLE271719 | <i>Apis</i> | <i>Apis mellifera</i> |
| POLLE272119 | <i>Apis</i> | <i>Apis mellifera</i> |
| POLLE272519 | <i>Apis</i> | <i>Apis mellifera</i> |
| POLLE272619 | <i>Apis</i> | <i>Apis mellifera</i> |
| POLLE272819 | <i>Apis</i> | <i>Apis mellifera</i> |
| POLLE273619 | <i>Apis</i> | <i>Apis mellifera</i> |
| POLLE273819 | <i>Apis</i> | <i>Apis mellifera</i> |
| POLLE274519 | <i>Apis</i> | <i>Apis mellifera</i> |
| POLLE274619 | <i>Apis</i> | <i>Apis mellifera</i> |
| POLLE274719 | <i>Apis</i> | <i>Apis mellifera</i> |
| POLLE275719 | <i>Apis</i> | <i>Apis mellifera</i> |
| POLLE275919 | <i>Apis</i> | <i>Apis mellifera</i> |
| POLLE276819 | <i>Apis</i> | <i>Apis mellifera</i> |
| POLLE276919 | <i>Apis</i> | <i>Apis mellifera</i> |
| POLLE285419 | <i>Apis</i> | <i>Apis mellifera</i> |
| POLLE286219 | <i>Apis</i> | <i>Apis mellifera</i> |
| POLLE286719 | <i>Apis</i> | <i>Apis mellifera</i> |
| POLLE287419 | <i>Apis</i> | <i>Apis mellifera</i> |
| POLLE287619 | <i>Apis</i> | <i>Apis mellifera</i> |
| POLLE288019 | <i>Apis</i> | <i>Apis mellifera</i> |
| POLLE288419 | <i>Apis</i> | <i>Apis mellifera</i> |
| POLLE289319 | <i>Apis</i> | <i>Apis mellifera</i> |
| POLLE291119 | <i>Apis</i> | <i>Apis mellifera</i> |

|             |             |                       |
|-------------|-------------|-----------------------|
| POLLE291419 | <i>Apis</i> | <i>Apis mellifera</i> |
| POLLE292219 | <i>Apis</i> | <i>Apis mellifera</i> |
| POLLE292819 | <i>Apis</i> | <i>Apis mellifera</i> |
| POLLE294819 | <i>Apis</i> | <i>Apis mellifera</i> |
| POLLE299519 | <i>Apis</i> | <i>Apis mellifera</i> |
| POLLE300219 | <i>Apis</i> | <i>Apis mellifera</i> |
| POLLE300719 | <i>Apis</i> | <i>Apis mellifera</i> |
| POLLE304219 | <i>Apis</i> | <i>Apis mellifera</i> |
| POLLE305319 | <i>Apis</i> | <i>Apis mellifera</i> |
| POLLE308919 | <i>Apis</i> | <i>Apis mellifera</i> |
| POLLE316619 | <i>Apis</i> | <i>Apis mellifera</i> |
| POLLE318319 | <i>Apis</i> | <i>Apis mellifera</i> |
| POLLE321519 | <i>Apis</i> | <i>Apis mellifera</i> |
| POLLE327619 | <i>Apis</i> | <i>Apis mellifera</i> |
| POLLE335519 | <i>Apis</i> | <i>Apis mellifera</i> |
| POLLE341119 | <i>Apis</i> | <i>Apis mellifera</i> |
| POLLE348419 | <i>Apis</i> | <i>Apis mellifera</i> |
| POLLE348819 | <i>Apis</i> | <i>Apis mellifera</i> |
| POLLE350219 | <i>Apis</i> | <i>Apis mellifera</i> |
| POLLE351819 | <i>Apis</i> | <i>Apis mellifera</i> |
| POLLE355119 | <i>Apis</i> | <i>Apis mellifera</i> |
| POLLE355219 | <i>Apis</i> | <i>Apis mellifera</i> |
| POLLE355319 | <i>Apis</i> | <i>Apis mellifera</i> |
| POLLE355419 | <i>Apis</i> | <i>Apis mellifera</i> |
| POLLE355519 | <i>Apis</i> | <i>Apis mellifera</i> |
| POLLE355619 | <i>Apis</i> | <i>Apis mellifera</i> |
| POLLE355719 | <i>Apis</i> | <i>Apis mellifera</i> |
| POLLE355819 | <i>Apis</i> | <i>Apis mellifera</i> |
| POLLE355919 | <i>Apis</i> | <i>Apis mellifera</i> |
| POLLE356019 | <i>Apis</i> | <i>Apis mellifera</i> |
| POLLE356119 | <i>Apis</i> | <i>Apis mellifera</i> |
| POLLE356219 | <i>Apis</i> | <i>Apis mellifera</i> |
| POLLE356319 | <i>Apis</i> | <i>Apis mellifera</i> |
| POLLE356419 | <i>Apis</i> | <i>Apis mellifera</i> |
| POLLE356519 | <i>Apis</i> | <i>Apis mellifera</i> |
| POLLE356619 | <i>Apis</i> | <i>Apis mellifera</i> |
| POLLE356719 | <i>Apis</i> | <i>Apis mellifera</i> |
| POLLE356819 | <i>Apis</i> | <i>Apis mellifera</i> |
| POLLE356919 | <i>Apis</i> | <i>Apis mellifera</i> |
| POLLE357019 | <i>Apis</i> | <i>Apis mellifera</i> |
| POLLE357119 | <i>Apis</i> | <i>Apis mellifera</i> |
| POLLE357219 | <i>Apis</i> | <i>Apis mellifera</i> |
| POLLE357319 | <i>Apis</i> | <i>Apis mellifera</i> |
| POLLE357419 | <i>Apis</i> | <i>Apis mellifera</i> |
| POLLE357519 | <i>Apis</i> | <i>Apis mellifera</i> |
| POLLE357619 | <i>Apis</i> | <i>Apis mellifera</i> |



|             |             |                       |
|-------------|-------------|-----------------------|
| POLLE357819 | <i>Apis</i> | <i>Apis mellifera</i> |
| POLLE357919 | <i>Apis</i> | <i>Apis mellifera</i> |
| POLLE358019 | <i>Apis</i> | <i>Apis mellifera</i> |
| POLLE358119 | <i>Apis</i> | <i>Apis mellifera</i> |
| POLLE358219 | <i>Apis</i> | <i>Apis mellifera</i> |
| POLLE358319 | <i>Apis</i> | <i>Apis mellifera</i> |
| POLLE358419 | <i>Apis</i> | <i>Apis mellifera</i> |
| POLLE358519 | <i>Apis</i> | <i>Apis mellifera</i> |
| POLLE358619 | <i>Apis</i> | <i>Apis mellifera</i> |
| POLLE358719 | <i>Apis</i> | <i>Apis mellifera</i> |
| POLLE358819 | <i>Apis</i> | <i>Apis mellifera</i> |
| POLLE358919 | <i>Apis</i> | <i>Apis mellifera</i> |
| POLLE359019 | <i>Apis</i> | <i>Apis mellifera</i> |
| POLLE359119 | <i>Apis</i> | <i>Apis mellifera</i> |
| POLLE359219 | <i>Apis</i> | <i>Apis mellifera</i> |
| POLLE359319 | <i>Apis</i> | <i>Apis mellifera</i> |
| POLLE359619 | <i>Apis</i> | <i>Apis mellifera</i> |
| POLLE359719 | <i>Apis</i> | <i>Apis mellifera</i> |
| POLLE359819 | <i>Apis</i> | <i>Apis mellifera</i> |
| POLLE59819  | <i>Apis</i> | <i>Apis mellifera</i> |
| PREXP07314  | <i>Apis</i> | <i>Apis mellifera</i> |
| PREXP07914  | <i>Apis</i> | <i>Apis mellifera</i> |
| PREXP08714  | <i>Apis</i> | <i>Apis mellifera</i> |
| PREXP16814  | <i>Apis</i> | <i>Apis mellifera</i> |
| PREXP17414  | <i>Apis</i> | <i>Apis mellifera</i> |
| PREXP18214  | <i>Apis</i> | <i>Apis mellifera</i> |
| PREXP26314  | <i>Apis</i> | <i>Apis mellifera</i> |
| PREXP26914  | <i>Apis</i> | <i>Apis mellifera</i> |
| PREXP27714  | <i>Apis</i> | <i>Apis mellifera</i> |
| PREXP28414  | <i>Apis</i> | <i>Apis mellifera</i> |
| PREXP35814  | <i>Apis</i> | <i>Apis mellifera</i> |
| PREXP36414  | <i>Apis</i> | <i>Apis mellifera</i> |
| PREXP37214  | <i>Apis</i> | <i>Apis mellifera</i> |
| PREXP37914  | <i>Apis</i> | <i>Apis mellifera</i> |
| QUEBE01906  | <i>Apis</i> | <i>Apis mellifera</i> |
| QUEBE02006  | <i>Apis</i> | <i>Apis mellifera</i> |
| QUEBE02106  | <i>Apis</i> | <i>Apis mellifera</i> |
| QUEBE02206  | <i>Apis</i> | <i>Apis mellifera</i> |
| RARBB84617  | <i>Apis</i> | <i>Apis mellifera</i> |
| RBINA196513 | <i>Apis</i> | <i>Apis mellifera</i> |
| RBINA503213 | <i>Apis</i> | <i>Apis mellifera</i> |
| RNOCF00517  | <i>Apis</i> | <i>Apis mellifera</i> |
| RNOCF36317  | <i>Apis</i> | <i>Apis mellifera</i> |
| SABEE71515  | <i>Apis</i> | <i>Apis mellifera</i> |
| SABEE71615  | <i>Apis</i> | <i>Apis mellifera</i> |
| SABEE72015  | <i>Apis</i> | <i>Apis mellifera</i> |

|             |             |                       |
|-------------|-------------|-----------------------|
| SAFRA442118 | <i>Apis</i> | <i>Apis mellifera</i> |
| SDP60500117 | <i>Apis</i> | <i>Apis mellifera</i> |
| SDP60500217 | <i>Apis</i> | <i>Apis mellifera</i> |
| SDP60500317 | <i>Apis</i> | <i>Apis mellifera</i> |
| SDP60501217 | <i>Apis</i> | <i>Apis mellifera</i> |
| SDP61500117 | <i>Apis</i> | <i>Apis mellifera</i> |
| SDP61500217 | <i>Apis</i> | <i>Apis mellifera</i> |
| SDP61500317 | <i>Apis</i> | <i>Apis mellifera</i> |
| SDP61500417 | <i>Apis</i> | <i>Apis mellifera</i> |
| SDP61500517 | <i>Apis</i> | <i>Apis mellifera</i> |
| SDP61500617 | <i>Apis</i> | <i>Apis mellifera</i> |
| SDP61500717 | <i>Apis</i> | <i>Apis mellifera</i> |
| SDP61500817 | <i>Apis</i> | <i>Apis mellifera</i> |
| SDP61500917 | <i>Apis</i> | <i>Apis mellifera</i> |
| SDP61501017 | <i>Apis</i> | <i>Apis mellifera</i> |
| SDP61501117 | <i>Apis</i> | <i>Apis mellifera</i> |
| SDP61501317 | <i>Apis</i> | <i>Apis mellifera</i> |
| SDP61501417 | <i>Apis</i> | <i>Apis mellifera</i> |
| SDP61501517 | <i>Apis</i> | <i>Apis mellifera</i> |
| SDP61501617 | <i>Apis</i> | <i>Apis mellifera</i> |
| SDP63900117 | <i>Apis</i> | <i>Apis mellifera</i> |
| SDP63900217 | <i>Apis</i> | <i>Apis mellifera</i> |
| SDP63900317 | <i>Apis</i> | <i>Apis mellifera</i> |
| SDP63900417 | <i>Apis</i> | <i>Apis mellifera</i> |
| SDP63900517 | <i>Apis</i> | <i>Apis mellifera</i> |
| SDP63900617 | <i>Apis</i> | <i>Apis mellifera</i> |
| SDP63900717 | <i>Apis</i> | <i>Apis mellifera</i> |
| SDP63900817 | <i>Apis</i> | <i>Apis mellifera</i> |
| SDP63900917 | <i>Apis</i> | <i>Apis mellifera</i> |
| SDP63901017 | <i>Apis</i> | <i>Apis mellifera</i> |
| SDP63901117 | <i>Apis</i> | <i>Apis mellifera</i> |
| SDP63901317 | <i>Apis</i> | <i>Apis mellifera</i> |
| SDP63901517 | <i>Apis</i> | <i>Apis mellifera</i> |
| SDP63901617 | <i>Apis</i> | <i>Apis mellifera</i> |
| SDP64500117 | <i>Apis</i> | <i>Apis mellifera</i> |
| SDP64500217 | <i>Apis</i> | <i>Apis mellifera</i> |
| SDP64500317 | <i>Apis</i> | <i>Apis mellifera</i> |
| SDP64500417 | <i>Apis</i> | <i>Apis mellifera</i> |
| SDP64500517 | <i>Apis</i> | <i>Apis mellifera</i> |
| SDP64500617 | <i>Apis</i> | <i>Apis mellifera</i> |
| SDP64500717 | <i>Apis</i> | <i>Apis mellifera</i> |
| SDP64500817 | <i>Apis</i> | <i>Apis mellifera</i> |
| SDP64500917 | <i>Apis</i> | <i>Apis mellifera</i> |
| SDP64501017 | <i>Apis</i> | <i>Apis mellifera</i> |
| SDP64501117 | <i>Apis</i> | <i>Apis mellifera</i> |
| SDP64501217 | <i>Apis</i> | <i>Apis mellifera</i> |

|             |             |                       |
|-------------|-------------|-----------------------|
| SDP64501317 | <i>Apis</i> | <i>Apis mellifera</i> |
| SDP64501417 | <i>Apis</i> | <i>Apis mellifera</i> |
| SDP64501517 | <i>Apis</i> | <i>Apis mellifera</i> |
| SDP71300518 | <i>Apis</i> | <i>Apis mellifera</i> |
| SDP71300618 | <i>Apis</i> | <i>Apis mellifera</i> |
| SDP71301518 | <i>Apis</i> | <i>Apis mellifera</i> |
| SMTPD350313 | <i>Apis</i> | <i>Apis mellifera</i> |
| SMTPD401513 | <i>Apis</i> | <i>Apis mellifera</i> |
| SMTPD430913 | <i>Apis</i> | <i>Apis mellifera</i> |
| SMTPD61713  | <i>Apis</i> | <i>Apis mellifera</i> |
| SMTPI888614 | <i>Apis</i> | <i>Apis mellifera</i> |
| SMTPJ315314 | <i>Apis</i> | <i>Apis mellifera</i> |
| SMTPJ315414 | <i>Apis</i> | <i>Apis mellifera</i> |
| SMTPJ47314  | <i>Apis</i> | <i>Apis mellifera</i> |
| SMTPJ47614  | <i>Apis</i> | <i>Apis mellifera</i> |
| SMTPJ47714  | <i>Apis</i> | <i>Apis mellifera</i> |
| SMTPJ47914  | <i>Apis</i> | <i>Apis mellifera</i> |
| SMTPJ48514  | <i>Apis</i> | <i>Apis mellifera</i> |
| SMTPJ48614  | <i>Apis</i> | <i>Apis mellifera</i> |
| SMTPJ48814  | <i>Apis</i> | <i>Apis mellifera</i> |
| SMTPM291315 | <i>Apis</i> | <i>Apis mellifera</i> |
| SMTPO346315 | <i>Apis</i> | <i>Apis mellifera</i> |
| SMTPO465815 | <i>Apis</i> | <i>Apis mellifera</i> |
| SMTPO465915 | <i>Apis</i> | <i>Apis mellifera</i> |
| SMTPO466915 | <i>Apis</i> | <i>Apis mellifera</i> |
| SMTPR110216 | <i>Apis</i> | <i>Apis mellifera</i> |
| SMTPR261016 | <i>Apis</i> | <i>Apis mellifera</i> |
| SMTPR261116 | <i>Apis</i> | <i>Apis mellifera</i> |
| SMTPR261216 | <i>Apis</i> | <i>Apis mellifera</i> |
| SMTPR917116 | <i>Apis</i> | <i>Apis mellifera</i> |
| SMTPS93416  | <i>Apis</i> | <i>Apis mellifera</i> |
| SYC210914   | <i>Apis</i> | <i>Apis mellifera</i> |
| SYC257514   | <i>Apis</i> | <i>Apis mellifera</i> |
| SYC276214   | <i>Apis</i> | <i>Apis mellifera</i> |
| SYC276314   | <i>Apis</i> | <i>Apis mellifera</i> |
| SYC475514   | <i>Apis</i> | <i>Apis mellifera</i> |
| SYC543914   | <i>Apis</i> | <i>Apis mellifera</i> |
| SYC548514   | <i>Apis</i> | <i>Apis mellifera</i> |
| SYC548614   | <i>Apis</i> | <i>Apis mellifera</i> |
| SYC548714   | <i>Apis</i> | <i>Apis mellifera</i> |
| SYC580814   | <i>Apis</i> | <i>Apis mellifera</i> |
| SYC86114    | <i>Apis</i> | <i>Apis mellifera</i> |
| SYC93414    | <i>Apis</i> | <i>Apis mellifera</i> |
| SYC949514   | <i>Apis</i> | <i>Apis mellifera</i> |
| SYC954414   | <i>Apis</i> | <i>Apis mellifera</i> |
| TDWGB02410  | <i>Apis</i> | <i>Apis mellifera</i> |

|            |             |                       |
|------------|-------------|-----------------------|
| TDWGB02510 | <i>Apis</i> | <i>Apis mellifera</i> |
| TDWGB03710 | <i>Apis</i> | <i>Apis mellifera</i> |
| TTHYW73808 | <i>Apis</i> | <i>Apis mellifera</i> |
| TTHYW76808 | <i>Apis</i> | <i>Apis mellifera</i> |
| TTHYW80508 | <i>Apis</i> | <i>Apis mellifera</i> |
| TZBCA31707 | <i>Apis</i> | <i>Apis mellifera</i> |
| TZBCA31807 | <i>Apis</i> | <i>Apis mellifera</i> |
| UAMIC72313 | <i>Apis</i> | <i>Apis mellifera</i> |
| UAMIC72413 | <i>Apis</i> | <i>Apis mellifera</i> |
| UGEAA00716 | <i>Apis</i> | <i>Apis mellifera</i> |
| UGEAA01216 | <i>Apis</i> | <i>Apis mellifera</i> |
| UGEAA01316 | <i>Apis</i> | <i>Apis mellifera</i> |
| UGEAA02616 | <i>Apis</i> | <i>Apis mellifera</i> |
| UGEAA05416 | <i>Apis</i> | <i>Apis mellifera</i> |
| UGEAA05516 | <i>Apis</i> | <i>Apis mellifera</i> |
| UNI7402119 | <i>Apis</i> | <i>Apis mellifera</i> |
| UPOLB01609 | <i>Apis</i> | <i>Apis mellifera</i> |
| UPOLB08209 | <i>Apis</i> | <i>Apis mellifera</i> |
| UPOLB17809 | <i>Apis</i> | <i>Apis mellifera</i> |
| UPOLB18909 | <i>Apis</i> | <i>Apis mellifera</i> |
| UPOLB20509 | <i>Apis</i> | <i>Apis mellifera</i> |
| UPOLB20609 | <i>Apis</i> | <i>Apis mellifera</i> |
| UPOLB21909 | <i>Apis</i> | <i>Apis mellifera</i> |
| UPOLB22109 | <i>Apis</i> | <i>Apis mellifera</i> |
| UPOLB22309 | <i>Apis</i> | <i>Apis mellifera</i> |
| UPOLB26709 | <i>Apis</i> | <i>Apis mellifera</i> |
| UPOLB26809 | <i>Apis</i> | <i>Apis mellifera</i> |
| UPOLB26909 | <i>Apis</i> | <i>Apis mellifera</i> |
| UPOLB30809 | <i>Apis</i> | <i>Apis mellifera</i> |
| UPOLB32109 | <i>Apis</i> | <i>Apis mellifera</i> |
| UPOLB32209 | <i>Apis</i> | <i>Apis mellifera</i> |
| UPOLB44809 | <i>Apis</i> | <i>Apis mellifera</i> |
| UPOLB44909 | <i>Apis</i> | <i>Apis mellifera</i> |
| UPOLB67109 | <i>Apis</i> | <i>Apis mellifera</i> |
| UPOLB67209 | <i>Apis</i> | <i>Apis mellifera</i> |
| UPOLB70009 | <i>Apis</i> | <i>Apis mellifera</i> |
| UPOLB70109 | <i>Apis</i> | <i>Apis mellifera</i> |
| UPOLB70209 | <i>Apis</i> | <i>Apis mellifera</i> |
| UPOLB70309 | <i>Apis</i> | <i>Apis mellifera</i> |
| UPOLB85209 | <i>Apis</i> | <i>Apis mellifera</i> |
| UPOLB93409 | <i>Apis</i> | <i>Apis mellifera</i> |
| UPOLL02609 | <i>Apis</i> | <i>Apis mellifera</i> |
| UPOLL19009 | <i>Apis</i> | <i>Apis mellifera</i> |
| UPOLL19109 | <i>Apis</i> | <i>Apis mellifera</i> |
| UPOLL19209 | <i>Apis</i> | <i>Apis mellifera</i> |
| UPOLL19309 | <i>Apis</i> | <i>Apis mellifera</i> |

|             |             |                         |
|-------------|-------------|-------------------------|
| UPOLL19409  | <i>Apis</i> | <i>Apis mellifera</i>   |
| UPOLL26209  | <i>Apis</i> | <i>Apis mellifera</i>   |
| UPOLL26509  | <i>Apis</i> | <i>Apis mellifera</i>   |
| UPOLL26609  | <i>Apis</i> | <i>Apis mellifera</i>   |
| UPOLL26709  | <i>Apis</i> | <i>Apis mellifera</i>   |
| UPOLL38309  | <i>Apis</i> | <i>Apis mellifera</i>   |
| UPOLL40109  | <i>Apis</i> | <i>Apis mellifera</i>   |
| UPOLL40209  | <i>Apis</i> | <i>Apis mellifera</i>   |
| UPOLL52009  | <i>Apis</i> | <i>Apis mellifera</i>   |
| UPOLL55109  | <i>Apis</i> | <i>Apis mellifera</i>   |
| UPOLL55209  | <i>Apis</i> | <i>Apis mellifera</i>   |
| UPOLL55309  | <i>Apis</i> | <i>Apis mellifera</i>   |
| UPOLL55409  | <i>Apis</i> | <i>Apis mellifera</i>   |
| UPOLL55509  | <i>Apis</i> | <i>Apis mellifera</i>   |
| UPOLL64309  | <i>Apis</i> | <i>Apis mellifera</i>   |
| UPOLL64409  | <i>Apis</i> | <i>Apis mellifera</i>   |
| UPOLL64509  | <i>Apis</i> | <i>Apis mellifera</i>   |
| UPOLL64609  | <i>Apis</i> | <i>Apis mellifera</i>   |
| UPOLL64709  | <i>Apis</i> | <i>Apis mellifera</i>   |
| UPOLL73209  | <i>Apis</i> | <i>Apis mellifera</i>   |
| UPOLL73309  | <i>Apis</i> | <i>Apis mellifera</i>   |
| UPOLL73409  | <i>Apis</i> | <i>Apis mellifera</i>   |
| UPOLL78109  | <i>Apis</i> | <i>Apis mellifera</i>   |
| UPOLL79509  | <i>Apis</i> | <i>Apis mellifera</i>   |
| UPOLL79609  | <i>Apis</i> | <i>Apis mellifera</i>   |
| UPOLL79709  | <i>Apis</i> | <i>Apis mellifera</i>   |
| UPOLL79809  | <i>Apis</i> | <i>Apis mellifera</i>   |
| UPOLL84409  | <i>Apis</i> | <i>Apis mellifera</i>   |
| UPOLL84509  | <i>Apis</i> | <i>Apis mellifera</i>   |
| UPOLL89909  | <i>Apis</i> | <i>Apis mellifera</i>   |
| UPOLL91609  | <i>Apis</i> | <i>Apis mellifera</i>   |
| UPOLL91709  | <i>Apis</i> | <i>Apis mellifera</i>   |
| UPOLL93309  | <i>Apis</i> | <i>Apis mellifera</i>   |
| VAQT53809   | <i>Apis</i> | <i>Apis mellifera</i>   |
| GBAH1772219 | <i>Apis</i> | <i>Apis nigrocincta</i> |
| GBAH1825419 | <i>Apis</i> | <i>Apis nigrocincta</i> |
| GBAH251607  | <i>Apis</i> | <i>Apis nigrocincta</i> |
| GBAH251707  | <i>Apis</i> | <i>Apis nigrocincta</i> |
| GBAH251807  | <i>Apis</i> | <i>Apis nigrocincta</i> |
| GBAH251907  | <i>Apis</i> | <i>Apis nigrocincta</i> |
| GBAH252007  | <i>Apis</i> | <i>Apis nigrocincta</i> |
| GBAH252107  | <i>Apis</i> | <i>Apis nigrocincta</i> |
| GBAH252207  | <i>Apis</i> | <i>Apis nigrocincta</i> |
| GBAH252307  | <i>Apis</i> | <i>Apis nigrocincta</i> |
| GBAH252407  | <i>Apis</i> | <i>Apis nigrocincta</i> |
| GBAH252507  | <i>Apis</i> | <i>Apis nigrocincta</i> |

|              |                      |                                 |                              |
|--------------|----------------------|---------------------------------|------------------------------|
| GBAH252607   | <i>Apis</i>          | <i>Apis nigrocincta</i>         |                              |
| GBAH252707   | <i>Apis</i>          | <i>Apis nigrocincta</i>         |                              |
| GBAH252807   | <i>Apis</i>          | <i>Apis nigrocincta</i>         |                              |
| GBAH524209   | <i>Apis</i>          | <i>Apis nigrocincta</i>         |                              |
| GBAH524309   | <i>Apis</i>          | <i>Apis nigrocincta</i>         |                              |
| GBMNA1898719 | <i>Apis</i>          | <i>Apis nigrocincta</i>         |                              |
| GBMNA1898819 | <i>Apis</i>          | <i>Apis nigrocincta</i>         |                              |
| GBMNB6097320 | <i>Apis</i>          | <i>Apis nigrocincta</i>         |                              |
| MAMTC24812   | <i>Apis</i>          | <i>Apis nigrocincta</i>         |                              |
| GBMNB6220220 | <i>Arhysoceble</i>   | <i>Arhysoceble huberi</i>       |                              |
| GBMNB6219920 | <i>Arhysoceble</i>   | <i>Arhysoceble picta</i>        |                              |
| GBMNB6220120 | <i>Arhysoceble</i>   | <i>Arhysoceble picta</i>        |                              |
| LASNA51608   | <i>Axestotrigona</i> | <i>Axestotrigona ferruginea</i> | <i>Meliponula ferruginea</i> |
| LASNA51808   | <i>Axestotrigona</i> | <i>Axestotrigona ferruginea</i> | <i>Meliponula ferruginea</i> |
| LASNA61108   | <i>Axestotrigona</i> | <i>Axestotrigona ferruginea</i> | <i>Meliponula ferruginea</i> |
| FBAPC98411   | <i>Biastes</i>       | <i>Biastes emarginatus</i>      |                              |
| FBAPB46009   | <i>Biastes</i>       | <i>Biastes truncatus</i>        |                              |
| GBMNB6250220 | <i>Biastes</i>       | <i>Biastes truncatus</i>        |                              |
| BBBO14710    | <i>Bombus</i>        | <i>Bombus affinis</i>           |                              |
| BEECA54306   | <i>Bombus</i>        | <i>Bombus affinis</i>           |                              |
| BEECD46409   | <i>Bombus</i>        | <i>Bombus affinis</i>           |                              |
| BBBO06710    | <i>Bombus</i>        | <i>Bombus alpinus</i>           |                              |
| BOMNI06613   | <i>Bombus</i>        | <i>Bombus alpinus</i>           |                              |
| FBAPB99009   | <i>Bombus</i>        | <i>Bombus alpinus</i>           |                              |
| WASPS38214   | <i>Bombus</i>        | <i>Bombus alpinus</i>           |                              |
| ASBEE03508   | <i>Bombus</i>        | <i>Bombus amurensis</i>         |                              |
| ASBEE03608   | <i>Bombus</i>        | <i>Bombus amurensis</i>         |                              |
| BBWP01309    | <i>Bombus</i>        | <i>Bombus amurensis</i>         |                              |
| BBWP01409    | <i>Bombus</i>        | <i>Bombus amurensis</i>         |                              |
| BBWP01509    | <i>Bombus</i>        | <i>Bombus amurensis</i>         |                              |
| BBWP01609    | <i>Bombus</i>        | <i>Bombus amurensis</i>         |                              |
| BBWP03809    | <i>Bombus</i>        | <i>Bombus amurensis</i>         |                              |
| BBWP03909    | <i>Bombus</i>        | <i>Bombus amurensis</i>         |                              |
| BBWP04009    | <i>Bombus</i>        | <i>Bombus amurensis</i>         |                              |
| BBWP04209    | <i>Bombus</i>        | <i>Bombus amurensis</i>         |                              |
| GBAH036706   | <i>Bombus</i>        | <i>Bombus anachoreta</i>        |                              |
| BBHYL24110   | <i>Bombus</i>        | <i>Bombus appositus</i>         |                              |
| BBHYL24410   | <i>Bombus</i>        | <i>Bombus appositus</i>         |                              |
| BBHYL25210   | <i>Bombus</i>        | <i>Bombus appositus</i>         |                              |
| BBWP10409    | <i>Bombus</i>        | <i>Bombus appositus</i>         |                              |
| BBWP10509    | <i>Bombus</i>        | <i>Bombus appositus</i>         |                              |
| BBWP10609    | <i>Bombus</i>        | <i>Bombus appositus</i>         |                              |
| BBWP15109    | <i>Bombus</i>        | <i>Bombus appositus</i>         |                              |
| BEECB105907  | <i>Bombus</i>        | <i>Bombus appositus</i>         |                              |
| BEECB106007  | <i>Bombus</i>        | <i>Bombus appositus</i>         |                              |
| BEECB41507   | <i>Bombus</i>        | <i>Bombus appositus</i>         |                              |

|             |               |                         |
|-------------|---------------|-------------------------|
| BEECC82709  | <i>Bombus</i> | <i>Bombus appositus</i> |
| CNBAD71812  | <i>Bombus</i> | <i>Bombus appositus</i> |
| CNWLD87912  | <i>Bombus</i> | <i>Bombus appositus</i> |
| NGAAC203414 | <i>Bombus</i> | <i>Bombus appositus</i> |
| NGAAC203514 | <i>Bombus</i> | <i>Bombus appositus</i> |
| NGAAC203814 | <i>Bombus</i> | <i>Bombus appositus</i> |
| NGAAC210414 | <i>Bombus</i> | <i>Bombus appositus</i> |
| NGNAC305813 | <i>Bombus</i> | <i>Bombus appositus</i> |
| NGNAC306413 | <i>Bombus</i> | <i>Bombus appositus</i> |
| NGNAI45513  | <i>Bombus</i> | <i>Bombus appositus</i> |
| NGNAK50413  | <i>Bombus</i> | <i>Bombus appositus</i> |
| NGNAN404314 | <i>Bombus</i> | <i>Bombus appositus</i> |
| NGNAN404414 | <i>Bombus</i> | <i>Bombus appositus</i> |
| NGNAN404514 | <i>Bombus</i> | <i>Bombus appositus</i> |
| NGNAN404614 | <i>Bombus</i> | <i>Bombus appositus</i> |
| NGNAN404714 | <i>Bombus</i> | <i>Bombus appositus</i> |
| NGNAS137714 | <i>Bombus</i> | <i>Bombus appositus</i> |
| NGNAS137814 | <i>Bombus</i> | <i>Bombus appositus</i> |
| NGNAS137914 | <i>Bombus</i> | <i>Bombus appositus</i> |
| NGNAS138314 | <i>Bombus</i> | <i>Bombus appositus</i> |
| NGNAS138414 | <i>Bombus</i> | <i>Bombus appositus</i> |
| NGNAS138514 | <i>Bombus</i> | <i>Bombus appositus</i> |
| NGNAS138614 | <i>Bombus</i> | <i>Bombus appositus</i> |
| NGNAS138814 | <i>Bombus</i> | <i>Bombus appositus</i> |
| NGNAS139514 | <i>Bombus</i> | <i>Bombus appositus</i> |
| NGNAS139614 | <i>Bombus</i> | <i>Bombus appositus</i> |
| NGNAS139814 | <i>Bombus</i> | <i>Bombus appositus</i> |
| NGNAS139914 | <i>Bombus</i> | <i>Bombus appositus</i> |
| NGNAS140514 | <i>Bombus</i> | <i>Bombus appositus</i> |
| NGNAS140614 | <i>Bombus</i> | <i>Bombus appositus</i> |
| NGNAS141314 | <i>Bombus</i> | <i>Bombus appositus</i> |
| NGNAT58114  | <i>Bombus</i> | <i>Bombus appositus</i> |
| NGNAX201714 | <i>Bombus</i> | <i>Bombus appositus</i> |
| NGNAX201914 | <i>Bombus</i> | <i>Bombus appositus</i> |
| NGNAX203714 | <i>Bombus</i> | <i>Bombus appositus</i> |
| NGNAX203814 | <i>Bombus</i> | <i>Bombus appositus</i> |
| SSBAA571812 | <i>Bombus</i> | <i>Bombus appositus</i> |
| SSBAD616613 | <i>Bombus</i> | <i>Bombus appositus</i> |
| SSWLE06513  | <i>Bombus</i> | <i>Bombus appositus</i> |
| SSWLE06613  | <i>Bombus</i> | <i>Bombus appositus</i> |
| SSWLE226313 | <i>Bombus</i> | <i>Bombus appositus</i> |
| SSWLE554913 | <i>Bombus</i> | <i>Bombus appositus</i> |
| SSWLE555113 | <i>Bombus</i> | <i>Bombus appositus</i> |
| SSWLE555213 | <i>Bombus</i> | <i>Bombus appositus</i> |
| SSWLE555413 | <i>Bombus</i> | <i>Bombus appositus</i> |
| SSWLE557613 | <i>Bombus</i> | <i>Bombus appositus</i> |

|            |               |                         |
|------------|---------------|-------------------------|
| TTHYW26208 | <i>Bombus</i> | <i>Bombus appositus</i> |
| TTHYW26308 | <i>Bombus</i> | <i>Bombus appositus</i> |
| TTHYW38208 | <i>Bombus</i> | <i>Bombus appositus</i> |
| TTHYW38308 | <i>Bombus</i> | <i>Bombus appositus</i> |
| TTHYW38708 | <i>Bombus</i> | <i>Bombus appositus</i> |
| TTHYW44408 | <i>Bombus</i> | <i>Bombus appositus</i> |
| GBAH034206 | <i>Bombus</i> | <i>Bombus ardens</i>    |
| GBAH034306 | <i>Bombus</i> | <i>Bombus ardens</i>    |
| GBAH034406 | <i>Bombus</i> | <i>Bombus ardens</i>    |
| GBAH034506 | <i>Bombus</i> | <i>Bombus ardens</i>    |
| GBAH034606 | <i>Bombus</i> | <i>Bombus ardens</i>    |
| GBAH034706 | <i>Bombus</i> | <i>Bombus ardens</i>    |
| GBAH076406 | <i>Bombus</i> | <i>Bombus ardens</i>    |
| GBAH076506 | <i>Bombus</i> | <i>Bombus ardens</i>    |
| GBAH076606 | <i>Bombus</i> | <i>Bombus ardens</i>    |
| GBAH076706 | <i>Bombus</i> | <i>Bombus ardens</i>    |
| GBAH076806 | <i>Bombus</i> | <i>Bombus ardens</i>    |
| GBAH076906 | <i>Bombus</i> | <i>Bombus ardens</i>    |
| GBAH077006 | <i>Bombus</i> | <i>Bombus ardens</i>    |
| GBAH077106 | <i>Bombus</i> | <i>Bombus ardens</i>    |
| GBAH077206 | <i>Bombus</i> | <i>Bombus ardens</i>    |
| GBAH077306 | <i>Bombus</i> | <i>Bombus ardens</i>    |
| GBAH077406 | <i>Bombus</i> | <i>Bombus ardens</i>    |
| GBAH077506 | <i>Bombus</i> | <i>Bombus ardens</i>    |
| GBAH077606 | <i>Bombus</i> | <i>Bombus ardens</i>    |
| GBAH077706 | <i>Bombus</i> | <i>Bombus ardens</i>    |
| GBAH077806 | <i>Bombus</i> | <i>Bombus ardens</i>    |
| GBAH077906 | <i>Bombus</i> | <i>Bombus ardens</i>    |
| GBAH078006 | <i>Bombus</i> | <i>Bombus ardens</i>    |
| GBAH078106 | <i>Bombus</i> | <i>Bombus ardens</i>    |
| GBAH078206 | <i>Bombus</i> | <i>Bombus ardens</i>    |
| GBAH078306 | <i>Bombus</i> | <i>Bombus ardens</i>    |
| GBAH078406 | <i>Bombus</i> | <i>Bombus ardens</i>    |
| GBAH078506 | <i>Bombus</i> | <i>Bombus ardens</i>    |
| GBAH078606 | <i>Bombus</i> | <i>Bombus ardens</i>    |
| GBAH078706 | <i>Bombus</i> | <i>Bombus ardens</i>    |
| GBAH078806 | <i>Bombus</i> | <i>Bombus ardens</i>    |
| GBAH078906 | <i>Bombus</i> | <i>Bombus ardens</i>    |
| GBAH079006 | <i>Bombus</i> | <i>Bombus ardens</i>    |
| GBAH079106 | <i>Bombus</i> | <i>Bombus ardens</i>    |
| GBAH079206 | <i>Bombus</i> | <i>Bombus ardens</i>    |
| GBAH079306 | <i>Bombus</i> | <i>Bombus ardens</i>    |
| GBAH079406 | <i>Bombus</i> | <i>Bombus ardens</i>    |
| GBAH079506 | <i>Bombus</i> | <i>Bombus ardens</i>    |
| GBAH079606 | <i>Bombus</i> | <i>Bombus ardens</i>    |
| GBAH079706 | <i>Bombus</i> | <i>Bombus ardens</i>    |



|             |               |                      |
|-------------|---------------|----------------------|
| GBAH079806  | <i>Bombus</i> | <i>Bombus ardens</i> |
| GBAH079906  | <i>Bombus</i> | <i>Bombus ardens</i> |
| GBAH080006  | <i>Bombus</i> | <i>Bombus ardens</i> |
| GBAH080106  | <i>Bombus</i> | <i>Bombus ardens</i> |
| GBAH080206  | <i>Bombus</i> | <i>Bombus ardens</i> |
| GBAH080306  | <i>Bombus</i> | <i>Bombus ardens</i> |
| GBAH080406  | <i>Bombus</i> | <i>Bombus ardens</i> |
| GBAH080506  | <i>Bombus</i> | <i>Bombus ardens</i> |
| GBAH080606  | <i>Bombus</i> | <i>Bombus ardens</i> |
| GBAH080706  | <i>Bombus</i> | <i>Bombus ardens</i> |
| GBAH1781819 | <i>Bombus</i> | <i>Bombus ardens</i> |
| GBAH1781919 | <i>Bombus</i> | <i>Bombus ardens</i> |
| GBAH1782019 | <i>Bombus</i> | <i>Bombus ardens</i> |
| GBAH1782119 | <i>Bombus</i> | <i>Bombus ardens</i> |
| GBAH1782219 | <i>Bombus</i> | <i>Bombus ardens</i> |
| GBAH1782319 | <i>Bombus</i> | <i>Bombus ardens</i> |
| GBAH1782419 | <i>Bombus</i> | <i>Bombus ardens</i> |
| GBAH1782519 | <i>Bombus</i> | <i>Bombus ardens</i> |
| GBAH1782619 | <i>Bombus</i> | <i>Bombus ardens</i> |
| GBAH1782719 | <i>Bombus</i> | <i>Bombus ardens</i> |
| GBAH1782819 | <i>Bombus</i> | <i>Bombus ardens</i> |
| GBAH1782919 | <i>Bombus</i> | <i>Bombus ardens</i> |
| GBAH1783019 | <i>Bombus</i> | <i>Bombus ardens</i> |
| GBAH1783119 | <i>Bombus</i> | <i>Bombus ardens</i> |
| GBAH1783219 | <i>Bombus</i> | <i>Bombus ardens</i> |
| GBAH1783319 | <i>Bombus</i> | <i>Bombus ardens</i> |
| GBAH1783419 | <i>Bombus</i> | <i>Bombus ardens</i> |
| GBAH1783519 | <i>Bombus</i> | <i>Bombus ardens</i> |
| GBAH1783619 | <i>Bombus</i> | <i>Bombus ardens</i> |
| GBAH1783719 | <i>Bombus</i> | <i>Bombus ardens</i> |
| GBAH1783819 | <i>Bombus</i> | <i>Bombus ardens</i> |
| GBAH1783919 | <i>Bombus</i> | <i>Bombus ardens</i> |
| GBAH1784019 | <i>Bombus</i> | <i>Bombus ardens</i> |
| GBAH1784119 | <i>Bombus</i> | <i>Bombus ardens</i> |
| GBAH1784219 | <i>Bombus</i> | <i>Bombus ardens</i> |
| GBAH1784319 | <i>Bombus</i> | <i>Bombus ardens</i> |
| GBAH1784419 | <i>Bombus</i> | <i>Bombus ardens</i> |
| GBAH1784519 | <i>Bombus</i> | <i>Bombus ardens</i> |
| GBAH1784619 | <i>Bombus</i> | <i>Bombus ardens</i> |
| GBAH1784719 | <i>Bombus</i> | <i>Bombus ardens</i> |
| GBAH567409  | <i>Bombus</i> | <i>Bombus ardens</i> |
| GBAH567509  | <i>Bombus</i> | <i>Bombus ardens</i> |
| GBAH567609  | <i>Bombus</i> | <i>Bombus ardens</i> |
| GBAH567709  | <i>Bombus</i> | <i>Bombus ardens</i> |
| GBAH567809  | <i>Bombus</i> | <i>Bombus ardens</i> |
| GBAH567909  | <i>Bombus</i> | <i>Bombus ardens</i> |

|            |               |                      |
|------------|---------------|----------------------|
| GBAH568009 | <i>Bombus</i> | <i>Bombus ardens</i> |
| GBAH568109 | <i>Bombus</i> | <i>Bombus ardens</i> |
| GBAH568209 | <i>Bombus</i> | <i>Bombus ardens</i> |
| GBAH568309 | <i>Bombus</i> | <i>Bombus ardens</i> |
| GBAH568409 | <i>Bombus</i> | <i>Bombus ardens</i> |
| GBAH568509 | <i>Bombus</i> | <i>Bombus ardens</i> |
| GBAH568609 | <i>Bombus</i> | <i>Bombus ardens</i> |
| GBAH568709 | <i>Bombus</i> | <i>Bombus ardens</i> |
| GBAH568809 | <i>Bombus</i> | <i>Bombus ardens</i> |
| GBAH568909 | <i>Bombus</i> | <i>Bombus ardens</i> |
| GBAH569009 | <i>Bombus</i> | <i>Bombus ardens</i> |
| GBAH569109 | <i>Bombus</i> | <i>Bombus ardens</i> |
| GBAH569209 | <i>Bombus</i> | <i>Bombus ardens</i> |
| GBAH569309 | <i>Bombus</i> | <i>Bombus ardens</i> |
| GBAH569409 | <i>Bombus</i> | <i>Bombus ardens</i> |
| GBAH569509 | <i>Bombus</i> | <i>Bombus ardens</i> |
| GBAH569609 | <i>Bombus</i> | <i>Bombus ardens</i> |
| GBAH569709 | <i>Bombus</i> | <i>Bombus ardens</i> |
| GBAH569809 | <i>Bombus</i> | <i>Bombus ardens</i> |
| GBAH569909 | <i>Bombus</i> | <i>Bombus ardens</i> |
| GBAH570009 | <i>Bombus</i> | <i>Bombus ardens</i> |
| GBAH570109 | <i>Bombus</i> | <i>Bombus ardens</i> |
| GBAH570209 | <i>Bombus</i> | <i>Bombus ardens</i> |
| GBAH570309 | <i>Bombus</i> | <i>Bombus ardens</i> |
| GBAH570409 | <i>Bombus</i> | <i>Bombus ardens</i> |
| GBAH570509 | <i>Bombus</i> | <i>Bombus ardens</i> |
| GBAH570609 | <i>Bombus</i> | <i>Bombus ardens</i> |
| GBAH570709 | <i>Bombus</i> | <i>Bombus ardens</i> |
| GBAH570809 | <i>Bombus</i> | <i>Bombus ardens</i> |
| GBAH570909 | <i>Bombus</i> | <i>Bombus ardens</i> |
| GBAH571009 | <i>Bombus</i> | <i>Bombus ardens</i> |
| GBAH571109 | <i>Bombus</i> | <i>Bombus ardens</i> |
| GBAH571209 | <i>Bombus</i> | <i>Bombus ardens</i> |
| GBAH571309 | <i>Bombus</i> | <i>Bombus ardens</i> |
| GBAH571409 | <i>Bombus</i> | <i>Bombus ardens</i> |
| GBAH571509 | <i>Bombus</i> | <i>Bombus ardens</i> |
| GBAH571609 | <i>Bombus</i> | <i>Bombus ardens</i> |
| GBAH571709 | <i>Bombus</i> | <i>Bombus ardens</i> |
| GBAH571809 | <i>Bombus</i> | <i>Bombus ardens</i> |
| GBAH571909 | <i>Bombus</i> | <i>Bombus ardens</i> |
| GBAH572009 | <i>Bombus</i> | <i>Bombus ardens</i> |
| GBAH572109 | <i>Bombus</i> | <i>Bombus ardens</i> |
| GBAH572209 | <i>Bombus</i> | <i>Bombus ardens</i> |
| GBAH572309 | <i>Bombus</i> | <i>Bombus ardens</i> |
| GBAH572409 | <i>Bombus</i> | <i>Bombus ardens</i> |
| GBAH572509 | <i>Bombus</i> | <i>Bombus ardens</i> |

|            |               |                      |
|------------|---------------|----------------------|
| GBAH572609 | <i>Bombus</i> | <i>Bombus ardens</i> |
| GBAH572709 | <i>Bombus</i> | <i>Bombus ardens</i> |
| GBAH572809 | <i>Bombus</i> | <i>Bombus ardens</i> |
| GBAH572909 | <i>Bombus</i> | <i>Bombus ardens</i> |
| GBAH573009 | <i>Bombus</i> | <i>Bombus ardens</i> |
| GBAH573109 | <i>Bombus</i> | <i>Bombus ardens</i> |
| GBAH573209 | <i>Bombus</i> | <i>Bombus ardens</i> |
| GBAH573309 | <i>Bombus</i> | <i>Bombus ardens</i> |
| GBAH573409 | <i>Bombus</i> | <i>Bombus ardens</i> |
| GBAH573509 | <i>Bombus</i> | <i>Bombus ardens</i> |
| GBAH573609 | <i>Bombus</i> | <i>Bombus ardens</i> |
| GBAH573709 | <i>Bombus</i> | <i>Bombus ardens</i> |
| GBAH573809 | <i>Bombus</i> | <i>Bombus ardens</i> |
| GBAH573909 | <i>Bombus</i> | <i>Bombus ardens</i> |
| GBAH574009 | <i>Bombus</i> | <i>Bombus ardens</i> |
| GBAH574109 | <i>Bombus</i> | <i>Bombus ardens</i> |
| GBAH574209 | <i>Bombus</i> | <i>Bombus ardens</i> |
| GBAH574309 | <i>Bombus</i> | <i>Bombus ardens</i> |
| GBAH574409 | <i>Bombus</i> | <i>Bombus ardens</i> |
| GBAH574509 | <i>Bombus</i> | <i>Bombus ardens</i> |
| GBAH574609 | <i>Bombus</i> | <i>Bombus ardens</i> |
| GBAH574709 | <i>Bombus</i> | <i>Bombus ardens</i> |
| GBAH574809 | <i>Bombus</i> | <i>Bombus ardens</i> |
| GBAH574909 | <i>Bombus</i> | <i>Bombus ardens</i> |
| GBAH575009 | <i>Bombus</i> | <i>Bombus ardens</i> |
| GBAH575109 | <i>Bombus</i> | <i>Bombus ardens</i> |
| GBAH575209 | <i>Bombus</i> | <i>Bombus ardens</i> |
| GBAH575309 | <i>Bombus</i> | <i>Bombus ardens</i> |
| GBAH575409 | <i>Bombus</i> | <i>Bombus ardens</i> |
| GBAH575509 | <i>Bombus</i> | <i>Bombus ardens</i> |
| GBAH575609 | <i>Bombus</i> | <i>Bombus ardens</i> |
| GBAH575709 | <i>Bombus</i> | <i>Bombus ardens</i> |
| GBAH575809 | <i>Bombus</i> | <i>Bombus ardens</i> |
| GBAH575909 | <i>Bombus</i> | <i>Bombus ardens</i> |
| GBAH576009 | <i>Bombus</i> | <i>Bombus ardens</i> |
| GBAH576109 | <i>Bombus</i> | <i>Bombus ardens</i> |
| GBAH576209 | <i>Bombus</i> | <i>Bombus ardens</i> |
| GBAH576309 | <i>Bombus</i> | <i>Bombus ardens</i> |
| GBAH576409 | <i>Bombus</i> | <i>Bombus ardens</i> |
| GBAH576509 | <i>Bombus</i> | <i>Bombus ardens</i> |
| GBAH576609 | <i>Bombus</i> | <i>Bombus ardens</i> |
| GBAH675310 | <i>Bombus</i> | <i>Bombus ardens</i> |
| GBAH675410 | <i>Bombus</i> | <i>Bombus ardens</i> |
| GBAH675510 | <i>Bombus</i> | <i>Bombus ardens</i> |
| GBAH675610 | <i>Bombus</i> | <i>Bombus ardens</i> |
| GBAH675710 | <i>Bombus</i> | <i>Bombus ardens</i> |

|            |               |                      |
|------------|---------------|----------------------|
| GBAH675810 | <i>Bombus</i> | <i>Bombus ardens</i> |
| GBAH675910 | <i>Bombus</i> | <i>Bombus ardens</i> |
| GBAH676010 | <i>Bombus</i> | <i>Bombus ardens</i> |
| GBAH676110 | <i>Bombus</i> | <i>Bombus ardens</i> |
| GBAH676210 | <i>Bombus</i> | <i>Bombus ardens</i> |
| GBAH676310 | <i>Bombus</i> | <i>Bombus ardens</i> |
| GBAH676410 | <i>Bombus</i> | <i>Bombus ardens</i> |
| GBAH676510 | <i>Bombus</i> | <i>Bombus ardens</i> |
| GBAH676610 | <i>Bombus</i> | <i>Bombus ardens</i> |
| GBAH676710 | <i>Bombus</i> | <i>Bombus ardens</i> |
| GBAH676810 | <i>Bombus</i> | <i>Bombus ardens</i> |
| GBAH676910 | <i>Bombus</i> | <i>Bombus ardens</i> |
| GBAH677010 | <i>Bombus</i> | <i>Bombus ardens</i> |
| GBAH677110 | <i>Bombus</i> | <i>Bombus ardens</i> |
| GBAH677210 | <i>Bombus</i> | <i>Bombus ardens</i> |
| GBAH677310 | <i>Bombus</i> | <i>Bombus ardens</i> |
| GBAH677410 | <i>Bombus</i> | <i>Bombus ardens</i> |
| GBAH677510 | <i>Bombus</i> | <i>Bombus ardens</i> |
| GBAH677610 | <i>Bombus</i> | <i>Bombus ardens</i> |
| GBAH677710 | <i>Bombus</i> | <i>Bombus ardens</i> |
| GBAH677810 | <i>Bombus</i> | <i>Bombus ardens</i> |
| GBAH677910 | <i>Bombus</i> | <i>Bombus ardens</i> |
| GBAH678010 | <i>Bombus</i> | <i>Bombus ardens</i> |
| GBAH678110 | <i>Bombus</i> | <i>Bombus ardens</i> |
| GBAH678210 | <i>Bombus</i> | <i>Bombus ardens</i> |
| GBAH678310 | <i>Bombus</i> | <i>Bombus ardens</i> |
| GBAH678410 | <i>Bombus</i> | <i>Bombus ardens</i> |
| GBAH678510 | <i>Bombus</i> | <i>Bombus ardens</i> |
| GBAH678610 | <i>Bombus</i> | <i>Bombus ardens</i> |
| GBAH678710 | <i>Bombus</i> | <i>Bombus ardens</i> |
| GBAH678810 | <i>Bombus</i> | <i>Bombus ardens</i> |
| GBAH678910 | <i>Bombus</i> | <i>Bombus ardens</i> |
| GBAH679010 | <i>Bombus</i> | <i>Bombus ardens</i> |
| GBAH679110 | <i>Bombus</i> | <i>Bombus ardens</i> |
| GBAH679210 | <i>Bombus</i> | <i>Bombus ardens</i> |
| GBAH679310 | <i>Bombus</i> | <i>Bombus ardens</i> |
| GBAH679410 | <i>Bombus</i> | <i>Bombus ardens</i> |
| GBAH679510 | <i>Bombus</i> | <i>Bombus ardens</i> |
| GBAH679610 | <i>Bombus</i> | <i>Bombus ardens</i> |
| GBAH679710 | <i>Bombus</i> | <i>Bombus ardens</i> |
| GBAH679810 | <i>Bombus</i> | <i>Bombus ardens</i> |
| GBAH679910 | <i>Bombus</i> | <i>Bombus ardens</i> |
| GBAH680010 | <i>Bombus</i> | <i>Bombus ardens</i> |
| GBAH680110 | <i>Bombus</i> | <i>Bombus ardens</i> |
| GBAH680210 | <i>Bombus</i> | <i>Bombus ardens</i> |
| GBAH680310 | <i>Bombus</i> | <i>Bombus ardens</i> |

|              |               |                      |
|--------------|---------------|----------------------|
| GBAH680410   | <i>Bombus</i> | <i>Bombus ardens</i> |
| GBAH680510   | <i>Bombus</i> | <i>Bombus ardens</i> |
| GBAH680610   | <i>Bombus</i> | <i>Bombus ardens</i> |
| GBAH680710   | <i>Bombus</i> | <i>Bombus ardens</i> |
| GBAH680810   | <i>Bombus</i> | <i>Bombus ardens</i> |
| GBAH680910   | <i>Bombus</i> | <i>Bombus ardens</i> |
| GBAH681010   | <i>Bombus</i> | <i>Bombus ardens</i> |
| GBAH681110   | <i>Bombus</i> | <i>Bombus ardens</i> |
| GBAH681210   | <i>Bombus</i> | <i>Bombus ardens</i> |
| GBAH681310   | <i>Bombus</i> | <i>Bombus ardens</i> |
| GBAH681410   | <i>Bombus</i> | <i>Bombus ardens</i> |
| GBAH681510   | <i>Bombus</i> | <i>Bombus ardens</i> |
| GBAH681610   | <i>Bombus</i> | <i>Bombus ardens</i> |
| GBAH681710   | <i>Bombus</i> | <i>Bombus ardens</i> |
| GBAH681810   | <i>Bombus</i> | <i>Bombus ardens</i> |
| GBAH681910   | <i>Bombus</i> | <i>Bombus ardens</i> |
| GBMIN7183317 | <i>Bombus</i> | <i>Bombus ardens</i> |
| GBMIN7183417 | <i>Bombus</i> | <i>Bombus ardens</i> |
| GBMIN7183517 | <i>Bombus</i> | <i>Bombus ardens</i> |
| GBMIN7183617 | <i>Bombus</i> | <i>Bombus ardens</i> |
| GBMIN7183717 | <i>Bombus</i> | <i>Bombus ardens</i> |
| GBMIN7183817 | <i>Bombus</i> | <i>Bombus ardens</i> |
| GBMIN7183917 | <i>Bombus</i> | <i>Bombus ardens</i> |
| GBMIN7184017 | <i>Bombus</i> | <i>Bombus ardens</i> |
| GBMIN7184117 | <i>Bombus</i> | <i>Bombus ardens</i> |
| GBMIN7184217 | <i>Bombus</i> | <i>Bombus ardens</i> |
| GBMIN7184317 | <i>Bombus</i> | <i>Bombus ardens</i> |
| GBMIN7184417 | <i>Bombus</i> | <i>Bombus ardens</i> |
| GBMIN7184517 | <i>Bombus</i> | <i>Bombus ardens</i> |
| GBMIN7184617 | <i>Bombus</i> | <i>Bombus ardens</i> |
| GBMIN7184717 | <i>Bombus</i> | <i>Bombus ardens</i> |
| GBMIN7184817 | <i>Bombus</i> | <i>Bombus ardens</i> |
| GBMIN7184917 | <i>Bombus</i> | <i>Bombus ardens</i> |
| GBMIN7185017 | <i>Bombus</i> | <i>Bombus ardens</i> |
| GBMIN7185117 | <i>Bombus</i> | <i>Bombus ardens</i> |
| GBMIN7185217 | <i>Bombus</i> | <i>Bombus ardens</i> |
| GBMIN7185317 | <i>Bombus</i> | <i>Bombus ardens</i> |
| GBMIN7185417 | <i>Bombus</i> | <i>Bombus ardens</i> |
| GBMIN7185517 | <i>Bombus</i> | <i>Bombus ardens</i> |
| GBMIN7185617 | <i>Bombus</i> | <i>Bombus ardens</i> |
| GBMIN7185717 | <i>Bombus</i> | <i>Bombus ardens</i> |
| GBMIN7185817 | <i>Bombus</i> | <i>Bombus ardens</i> |
| GBMIN7185917 | <i>Bombus</i> | <i>Bombus ardens</i> |
| GBMIN7186017 | <i>Bombus</i> | <i>Bombus ardens</i> |
| GBMIN7186117 | <i>Bombus</i> | <i>Bombus ardens</i> |
| GBMIN7186217 | <i>Bombus</i> | <i>Bombus ardens</i> |

|              |               |                      |
|--------------|---------------|----------------------|
| GBMIN7186317 | <i>Bombus</i> | <i>Bombus ardens</i> |
| GBMIN7186417 | <i>Bombus</i> | <i>Bombus ardens</i> |
| GBMIN7186517 | <i>Bombus</i> | <i>Bombus ardens</i> |
| GBMIN7186617 | <i>Bombus</i> | <i>Bombus ardens</i> |
| GBMIN7186717 | <i>Bombus</i> | <i>Bombus ardens</i> |
| GBMIN7186817 | <i>Bombus</i> | <i>Bombus ardens</i> |
| GBMIN7186917 | <i>Bombus</i> | <i>Bombus ardens</i> |
| GBMIN7187017 | <i>Bombus</i> | <i>Bombus ardens</i> |
| GBMIN7187117 | <i>Bombus</i> | <i>Bombus ardens</i> |
| GBMIN7187217 | <i>Bombus</i> | <i>Bombus ardens</i> |
| GBMIN7187317 | <i>Bombus</i> | <i>Bombus ardens</i> |
| GBMIN7187417 | <i>Bombus</i> | <i>Bombus ardens</i> |
| GBMIN7187517 | <i>Bombus</i> | <i>Bombus ardens</i> |
| GBMIN7187617 | <i>Bombus</i> | <i>Bombus ardens</i> |
| GBMIN7187717 | <i>Bombus</i> | <i>Bombus ardens</i> |
| GBMIN7187817 | <i>Bombus</i> | <i>Bombus ardens</i> |
| GBMIN7187917 | <i>Bombus</i> | <i>Bombus ardens</i> |
| GBMIN7188017 | <i>Bombus</i> | <i>Bombus ardens</i> |
| GBMIN7188117 | <i>Bombus</i> | <i>Bombus ardens</i> |
| GBMIN7188217 | <i>Bombus</i> | <i>Bombus ardens</i> |
| GBMIN7188317 | <i>Bombus</i> | <i>Bombus ardens</i> |
| GBMIN7188417 | <i>Bombus</i> | <i>Bombus ardens</i> |
| GBMIN7188517 | <i>Bombus</i> | <i>Bombus ardens</i> |
| GBMIN7188617 | <i>Bombus</i> | <i>Bombus ardens</i> |
| GBMIN7188717 | <i>Bombus</i> | <i>Bombus ardens</i> |
| GBMIN7188817 | <i>Bombus</i> | <i>Bombus ardens</i> |
| GBMIN7188917 | <i>Bombus</i> | <i>Bombus ardens</i> |
| GBMIN7189017 | <i>Bombus</i> | <i>Bombus ardens</i> |
| GBMIN7189117 | <i>Bombus</i> | <i>Bombus ardens</i> |
| GBMIN7189217 | <i>Bombus</i> | <i>Bombus ardens</i> |
| GBMIN7189317 | <i>Bombus</i> | <i>Bombus ardens</i> |
| GBMIN7189417 | <i>Bombus</i> | <i>Bombus ardens</i> |
| GBMIN7189517 | <i>Bombus</i> | <i>Bombus ardens</i> |
| GBMIN7189617 | <i>Bombus</i> | <i>Bombus ardens</i> |
| GBMIN7189717 | <i>Bombus</i> | <i>Bombus ardens</i> |
| GBMIN7189817 | <i>Bombus</i> | <i>Bombus ardens</i> |
| GBMIN7189917 | <i>Bombus</i> | <i>Bombus ardens</i> |
| GBMIN7190017 | <i>Bombus</i> | <i>Bombus ardens</i> |
| GBMIN7190117 | <i>Bombus</i> | <i>Bombus ardens</i> |
| GBMIN7190217 | <i>Bombus</i> | <i>Bombus ardens</i> |
| GBMIN7190317 | <i>Bombus</i> | <i>Bombus ardens</i> |
| GBMIN7190417 | <i>Bombus</i> | <i>Bombus ardens</i> |
| GBMIN7190517 | <i>Bombus</i> | <i>Bombus ardens</i> |
| GBMIN7190617 | <i>Bombus</i> | <i>Bombus ardens</i> |
| GBMIN7190717 | <i>Bombus</i> | <i>Bombus ardens</i> |
| GBMIN7190817 | <i>Bombus</i> | <i>Bombus ardens</i> |

|              |               |                           |
|--------------|---------------|---------------------------|
| GBMIN7190917 | <i>Bombus</i> | <i>Bombus ardens</i>      |
| GBMIN7191017 | <i>Bombus</i> | <i>Bombus ardens</i>      |
| GBMIN7191117 | <i>Bombus</i> | <i>Bombus ardens</i>      |
| GBMIN7191217 | <i>Bombus</i> | <i>Bombus ardens</i>      |
| GBMIN7191317 | <i>Bombus</i> | <i>Bombus ardens</i>      |
| GBMIN7191417 | <i>Bombus</i> | <i>Bombus ardens</i>      |
| GBMIN7191517 | <i>Bombus</i> | <i>Bombus ardens</i>      |
| GBMIN7191617 | <i>Bombus</i> | <i>Bombus ardens</i>      |
| GBMIN7191717 | <i>Bombus</i> | <i>Bombus ardens</i>      |
| GBMIN7191817 | <i>Bombus</i> | <i>Bombus ardens</i>      |
| GBMIN7191917 | <i>Bombus</i> | <i>Bombus ardens</i>      |
| GBMIN7192017 | <i>Bombus</i> | <i>Bombus ardens</i>      |
| GBMIN7192117 | <i>Bombus</i> | <i>Bombus ardens</i>      |
| GBMIN7192217 | <i>Bombus</i> | <i>Bombus ardens</i>      |
| GBMIN7192317 | <i>Bombus</i> | <i>Bombus ardens</i>      |
| GBMIN7192417 | <i>Bombus</i> | <i>Bombus ardens</i>      |
| GBMIN7192517 | <i>Bombus</i> | <i>Bombus ardens</i>      |
| GBMIN7192617 | <i>Bombus</i> | <i>Bombus ardens</i>      |
| GBMIN7192717 | <i>Bombus</i> | <i>Bombus ardens</i>      |
| GBMIN7192817 | <i>Bombus</i> | <i>Bombus ardens</i>      |
| GBMIN7192917 | <i>Bombus</i> | <i>Bombus ardens</i>      |
| GBMIN7193017 | <i>Bombus</i> | <i>Bombus ardens</i>      |
| GBMNA3286419 | <i>Bombus</i> | <i>Bombus ardens</i>      |
| GBMNA3286519 | <i>Bombus</i> | <i>Bombus ardens</i>      |
| GBMNA3286619 | <i>Bombus</i> | <i>Bombus ardens</i>      |
| GBACU347613  | <i>Bombus</i> | <i>Bombus argillaceus</i> |
| GBACU347713  | <i>Bombus</i> | <i>Bombus argillaceus</i> |
| GBACU347813  | <i>Bombus</i> | <i>Bombus argillaceus</i> |
| GBACU347913  | <i>Bombus</i> | <i>Bombus argillaceus</i> |
| GBACU348013  | <i>Bombus</i> | <i>Bombus argillaceus</i> |
| GBAH1075015  | <i>Bombus</i> | <i>Bombus argillaceus</i> |
| GBMNA4152919 | <i>Bombus</i> | <i>Bombus asiaticus</i>   |
| BEECA27406   | <i>Bombus</i> | <i>Bombus auricomus</i>   |
| BEECA72007   | <i>Bombus</i> | <i>Bombus auricomus</i>   |
| GBMIN7193117 | <i>Bombus</i> | <i>Bombus auricomus</i>   |
| OUHY01509    | <i>Bombus</i> | <i>Bombus auricomus</i>   |
| ASBEE04808   | <i>Bombus</i> | <i>Bombus avanus</i>      |
| ASBEE04908   | <i>Bombus</i> | <i>Bombus avanus</i>      |
| ASBEE05008   | <i>Bombus</i> | <i>Bombus avanus</i>      |
| ASBEE14208   | <i>Bombus</i> | <i>Bombus avanus</i>      |
| ASBEE14308   | <i>Bombus</i> | <i>Bombus avanus</i>      |
| ASBEE14408   | <i>Bombus</i> | <i>Bombus avanus</i>      |
| GBAH1075115  | <i>Bombus</i> | <i>Bombus bahiensis</i>   |
| GBAH1075215  | <i>Bombus</i> | <i>Bombus bahiensis</i>   |
| GBAH1075315  | <i>Bombus</i> | <i>Bombus bahiensis</i>   |
| BBWP35509    | <i>Bombus</i> | <i>Bombus balteatus</i>   |

|              |               |                           |                           |
|--------------|---------------|---------------------------|---------------------------|
| GBAH066106   | <i>Bombus</i> | <i>Bombus balteatus</i>   |                           |
| MOBIL109915  | <i>Bombus</i> | <i>Bombus balteatus</i>   |                           |
| MOBIL120016  | <i>Bombus</i> | <i>Bombus balteatus</i>   |                           |
| NOAPI56714   | <i>Bombus</i> | <i>Bombus balteatus</i>   |                           |
| WASPS39814   | <i>Bombus</i> | <i>Bombus balteatus</i>   |                           |
| WASPS39914   | <i>Bombus</i> | <i>Bombus balteatus</i>   |                           |
| WASPS42314   | <i>Bombus</i> | <i>Bombus balteatus</i>   |                           |
| BEEEE15715   | <i>Bombus</i> | <i>Bombus barbutellus</i> |                           |
| FBAPD60411   | <i>Bombus</i> | <i>Bombus barbutellus</i> |                           |
| FBAPD60511   | <i>Bombus</i> | <i>Bombus barbutellus</i> |                           |
| FBAPD60711   | <i>Bombus</i> | <i>Bombus barbutellus</i> |                           |
| FBHAP76209   | <i>Bombus</i> | <i>Bombus barbutellus</i> |                           |
| FBHAP76309   | <i>Bombus</i> | <i>Bombus barbutellus</i> |                           |
| FBHAP76409   | <i>Bombus</i> | <i>Bombus barbutellus</i> |                           |
| GBAH074006   | <i>Bombus</i> | <i>Bombus barbutellus</i> |                           |
| GBAH074106   | <i>Bombus</i> | <i>Bombus barbutellus</i> |                           |
| GBAH1825719  | <i>Bombus</i> | <i>Bombus barbutellus</i> |                           |
| GBSP020106   | <i>Bombus</i> | <i>Bombus barbutellus</i> |                           |
| GBAH034806   | <i>Bombus</i> | <i>Bombus beaticola</i>   |                           |
| GBAH034906   | <i>Bombus</i> | <i>Bombus beaticola</i>   |                           |
| GBAH035006   | <i>Bombus</i> | <i>Bombus beaticola</i>   |                           |
| GBAH035106   | <i>Bombus</i> | <i>Bombus beaticola</i>   |                           |
| GBAH035206   | <i>Bombus</i> | <i>Bombus beaticola</i>   |                           |
| GBAH040706   | <i>Bombus</i> | <i>Bombus beaticola</i>   |                           |
| BOFTW08608   | <i>Bombus</i> | <i>Bombus bellardii</i>   |                           |
| BOFTW08708   | <i>Bombus</i> | <i>Bombus bellardii</i>   |                           |
| GBAH1583119  | <i>Bombus</i> | <i>Bombus bellicosus</i>  |                           |
| GBAH041306   | <i>Bombus</i> | <i>Bombus bicoloratus</i> |                           |
| GBAH709710   | <i>Bombus</i> | <i>Bombus bicoloratus</i> | <i>Bombus kulingensis</i> |
| GBMNA2192719 | <i>Bombus</i> | <i>Bombus bicoloratus</i> |                           |
| GBMNA2192819 | <i>Bombus</i> | <i>Bombus bicoloratus</i> |                           |
| BBHYL25010   | <i>Bombus</i> | <i>Bombus bifarius</i>    |                           |
| BBHYL25110   | <i>Bombus</i> | <i>Bombus bifarius</i>    |                           |
| BBHYL26710   | <i>Bombus</i> | <i>Bombus bifarius</i>    |                           |
| BBHYL26810   | <i>Bombus</i> | <i>Bombus bifarius</i>    |                           |
| BBHYL28210   | <i>Bombus</i> | <i>Bombus bifarius</i>    |                           |
| BBHYL28410   | <i>Bombus</i> | <i>Bombus bifarius</i>    |                           |
| BEECA15006   | <i>Bombus</i> | <i>Bombus bifarius</i>    |                           |
| BEECB58707   | <i>Bombus</i> | <i>Bombus bifarius</i>    |                           |
| BEECB60807   | <i>Bombus</i> | <i>Bombus bifarius</i>    |                           |
| BEECB61407   | <i>Bombus</i> | <i>Bombus bifarius</i>    |                           |
| BEECC46508   | <i>Bombus</i> | <i>Bombus bifarius</i>    |                           |
| CNBAB40012   | <i>Bombus</i> | <i>Bombus bifarius</i>    |                           |
| CNBAI56913   | <i>Bombus</i> | <i>Bombus bifarius</i>    |                           |
| CNBAI57013   | <i>Bombus</i> | <i>Bombus bifarius</i>    |                           |
| CNGIE34212   | <i>Bombus</i> | <i>Bombus bifarius</i>    |                           |



|              |               |                        |
|--------------|---------------|------------------------|
| CNGUA65714   | <i>Bombus</i> | <i>Bombus bifarius</i> |
| CNGUA66014   | <i>Bombus</i> | <i>Bombus bifarius</i> |
| CNGUA66314   | <i>Bombus</i> | <i>Bombus bifarius</i> |
| CNGUC96215   | <i>Bombus</i> | <i>Bombus bifarius</i> |
| CNGUC96415   | <i>Bombus</i> | <i>Bombus bifarius</i> |
| CNGUK00415   | <i>Bombus</i> | <i>Bombus bifarius</i> |
| CNJAD202812  | <i>Bombus</i> | <i>Bombus bifarius</i> |
| CNKTE00815   | <i>Bombus</i> | <i>Bombus bifarius</i> |
| CNKTG00115   | <i>Bombus</i> | <i>Bombus bifarius</i> |
| CNWLD88212   | <i>Bombus</i> | <i>Bombus bifarius</i> |
| CNWLE243912  | <i>Bombus</i> | <i>Bombus bifarius</i> |
| CNWLE244012  | <i>Bombus</i> | <i>Bombus bifarius</i> |
| CNWLF197212  | <i>Bombus</i> | <i>Bombus bifarius</i> |
| CNWLF197612  | <i>Bombus</i> | <i>Bombus bifarius</i> |
| CNWLF197812  | <i>Bombus</i> | <i>Bombus bifarius</i> |
| CNWLF198112  | <i>Bombus</i> | <i>Bombus bifarius</i> |
| CNWLF198712  | <i>Bombus</i> | <i>Bombus bifarius</i> |
| CNWLF198912  | <i>Bombus</i> | <i>Bombus bifarius</i> |
| CNWLF199012  | <i>Bombus</i> | <i>Bombus bifarius</i> |
| CNWLF199112  | <i>Bombus</i> | <i>Bombus bifarius</i> |
| CNWLF205912  | <i>Bombus</i> | <i>Bombus bifarius</i> |
| CNWLF207512  | <i>Bombus</i> | <i>Bombus bifarius</i> |
| CNWLG96212   | <i>Bombus</i> | <i>Bombus bifarius</i> |
| CNWLM15013   | <i>Bombus</i> | <i>Bombus bifarius</i> |
| CNWLM15413   | <i>Bombus</i> | <i>Bombus bifarius</i> |
| CNWLN101913  | <i>Bombus</i> | <i>Bombus bifarius</i> |
| CNWLN102513  | <i>Bombus</i> | <i>Bombus bifarius</i> |
| CNWLN102613  | <i>Bombus</i> | <i>Bombus bifarius</i> |
| CNWLN153413  | <i>Bombus</i> | <i>Bombus bifarius</i> |
| GBMNB6294920 | <i>Bombus</i> | <i>Bombus bifarius</i> |
| GBMNB6295020 | <i>Bombus</i> | <i>Bombus bifarius</i> |
| GBMNB6295120 | <i>Bombus</i> | <i>Bombus bifarius</i> |
| GBMNB6295220 | <i>Bombus</i> | <i>Bombus bifarius</i> |
| GBMNB6295320 | <i>Bombus</i> | <i>Bombus bifarius</i> |
| GBMNB6295420 | <i>Bombus</i> | <i>Bombus bifarius</i> |
| GBMNB6295520 | <i>Bombus</i> | <i>Bombus bifarius</i> |
| GBMNB6295620 | <i>Bombus</i> | <i>Bombus bifarius</i> |
| GBMNB6295720 | <i>Bombus</i> | <i>Bombus bifarius</i> |
| GBMNB6295820 | <i>Bombus</i> | <i>Bombus bifarius</i> |
| GBMNB6295920 | <i>Bombus</i> | <i>Bombus bifarius</i> |
| GBMNB6296020 | <i>Bombus</i> | <i>Bombus bifarius</i> |
| GBMNB6296120 | <i>Bombus</i> | <i>Bombus bifarius</i> |
| GBMNB6296220 | <i>Bombus</i> | <i>Bombus bifarius</i> |
| GBMNB6296320 | <i>Bombus</i> | <i>Bombus bifarius</i> |
| GBMNB6296420 | <i>Bombus</i> | <i>Bombus bifarius</i> |
| GBMNB6296520 | <i>Bombus</i> | <i>Bombus bifarius</i> |

|              |               |                        |
|--------------|---------------|------------------------|
| GBMNB6296620 | <i>Bombus</i> | <i>Bombus bifarius</i> |
| GBMNB6296720 | <i>Bombus</i> | <i>Bombus bifarius</i> |
| GBMNB6296820 | <i>Bombus</i> | <i>Bombus bifarius</i> |
| GBMNB6296920 | <i>Bombus</i> | <i>Bombus bifarius</i> |
| GBMNB6297020 | <i>Bombus</i> | <i>Bombus bifarius</i> |
| GBMNB6297120 | <i>Bombus</i> | <i>Bombus bifarius</i> |
| GBMNB6297220 | <i>Bombus</i> | <i>Bombus bifarius</i> |
| GBMNB6297320 | <i>Bombus</i> | <i>Bombus bifarius</i> |
| GBMNB6297420 | <i>Bombus</i> | <i>Bombus bifarius</i> |
| GBMNB6297520 | <i>Bombus</i> | <i>Bombus bifarius</i> |
| GBMNB6297620 | <i>Bombus</i> | <i>Bombus bifarius</i> |
| GBMNB6297720 | <i>Bombus</i> | <i>Bombus bifarius</i> |
| GBMNB6297820 | <i>Bombus</i> | <i>Bombus bifarius</i> |
| GBMNB6297920 | <i>Bombus</i> | <i>Bombus bifarius</i> |
| NGAAC204814  | <i>Bombus</i> | <i>Bombus bifarius</i> |
| NGAAC204914  | <i>Bombus</i> | <i>Bombus bifarius</i> |
| NGAAC205114  | <i>Bombus</i> | <i>Bombus bifarius</i> |
| NGAAC205514  | <i>Bombus</i> | <i>Bombus bifarius</i> |
| NGAAC206114  | <i>Bombus</i> | <i>Bombus bifarius</i> |
| NGAAC206814  | <i>Bombus</i> | <i>Bombus bifarius</i> |
| NGAAC207414  | <i>Bombus</i> | <i>Bombus bifarius</i> |
| NGAAC207514  | <i>Bombus</i> | <i>Bombus bifarius</i> |
| NGAAC209914  | <i>Bombus</i> | <i>Bombus bifarius</i> |
| NGAAC210214  | <i>Bombus</i> | <i>Bombus bifarius</i> |
| NGAAC210814  | <i>Bombus</i> | <i>Bombus bifarius</i> |
| NGAAC211014  | <i>Bombus</i> | <i>Bombus bifarius</i> |
| NGAAD189014  | <i>Bombus</i> | <i>Bombus bifarius</i> |
| NGAAD189414  | <i>Bombus</i> | <i>Bombus bifarius</i> |
| NGAAD189614  | <i>Bombus</i> | <i>Bombus bifarius</i> |
| NGAAD189914  | <i>Bombus</i> | <i>Bombus bifarius</i> |
| NGAAD190114  | <i>Bombus</i> | <i>Bombus bifarius</i> |
| NGAAD190314  | <i>Bombus</i> | <i>Bombus bifarius</i> |
| NGAAD190514  | <i>Bombus</i> | <i>Bombus bifarius</i> |
| NGAAD190614  | <i>Bombus</i> | <i>Bombus bifarius</i> |
| NGAAD190814  | <i>Bombus</i> | <i>Bombus bifarius</i> |
| NGAAD190914  | <i>Bombus</i> | <i>Bombus bifarius</i> |
| NGAAD191014  | <i>Bombus</i> | <i>Bombus bifarius</i> |
| NGAAD191114  | <i>Bombus</i> | <i>Bombus bifarius</i> |
| NGAAD191314  | <i>Bombus</i> | <i>Bombus bifarius</i> |
| NGAAD191414  | <i>Bombus</i> | <i>Bombus bifarius</i> |
| NGAAD191514  | <i>Bombus</i> | <i>Bombus bifarius</i> |
| NGAAD192014  | <i>Bombus</i> | <i>Bombus bifarius</i> |
| NGAAD192114  | <i>Bombus</i> | <i>Bombus bifarius</i> |
| NGAAD192214  | <i>Bombus</i> | <i>Bombus bifarius</i> |
| NGAAD192314  | <i>Bombus</i> | <i>Bombus bifarius</i> |
| NGAAD192414  | <i>Bombus</i> | <i>Bombus bifarius</i> |

|             |               |                        |
|-------------|---------------|------------------------|
| NGAAD192914 | <i>Bombus</i> | <i>Bombus bifarius</i> |
| NGAAD193014 | <i>Bombus</i> | <i>Bombus bifarius</i> |
| NGAAD194914 | <i>Bombus</i> | <i>Bombus bifarius</i> |
| NGNAE29913  | <i>Bombus</i> | <i>Bombus bifarius</i> |
| NGNAJ00313  | <i>Bombus</i> | <i>Bombus bifarius</i> |
| NGNAJ00713  | <i>Bombus</i> | <i>Bombus bifarius</i> |
| NGNAK50813  | <i>Bombus</i> | <i>Bombus bifarius</i> |
| NGNAK50913  | <i>Bombus</i> | <i>Bombus bifarius</i> |
| NGNAL12213  | <i>Bombus</i> | <i>Bombus bifarius</i> |
| NGNAL12413  | <i>Bombus</i> | <i>Bombus bifarius</i> |
| NGNAS138214 | <i>Bombus</i> | <i>Bombus bifarius</i> |
| NGNAS139114 | <i>Bombus</i> | <i>Bombus bifarius</i> |
| NGNAS139214 | <i>Bombus</i> | <i>Bombus bifarius</i> |
| NGNAS139314 | <i>Bombus</i> | <i>Bombus bifarius</i> |
| NGNAS139714 | <i>Bombus</i> | <i>Bombus bifarius</i> |
| NGNAS140114 | <i>Bombus</i> | <i>Bombus bifarius</i> |
| NGNAS141114 | <i>Bombus</i> | <i>Bombus bifarius</i> |
| NGNAT59314  | <i>Bombus</i> | <i>Bombus bifarius</i> |
| NGNAT59414  | <i>Bombus</i> | <i>Bombus bifarius</i> |
| NGNAX201814 | <i>Bombus</i> | <i>Bombus bifarius</i> |
| NGNAX207314 | <i>Bombus</i> | <i>Bombus bifarius</i> |
| SMTPM115915 | <i>Bombus</i> | <i>Bombus bifarius</i> |
| SMTPM457015 | <i>Bombus</i> | <i>Bombus bifarius</i> |
| SSBAA572512 | <i>Bombus</i> | <i>Bombus bifarius</i> |
| SSBAD615513 | <i>Bombus</i> | <i>Bombus bifarius</i> |
| SSBAD619713 | <i>Bombus</i> | <i>Bombus bifarius</i> |
| SSBAD619813 | <i>Bombus</i> | <i>Bombus bifarius</i> |
| SSBAD620213 | <i>Bombus</i> | <i>Bombus bifarius</i> |
| SSBAD620713 | <i>Bombus</i> | <i>Bombus bifarius</i> |
| SSBAD620913 | <i>Bombus</i> | <i>Bombus bifarius</i> |
| SSBAD621013 | <i>Bombus</i> | <i>Bombus bifarius</i> |
| SSBAD621813 | <i>Bombus</i> | <i>Bombus bifarius</i> |
| SSDWA478915 | <i>Bombus</i> | <i>Bombus bifarius</i> |
| SSDWA543015 | <i>Bombus</i> | <i>Bombus bifarius</i> |
| SSGIA316115 | <i>Bombus</i> | <i>Bombus bifarius</i> |
| SSGIC472615 | <i>Bombus</i> | <i>Bombus bifarius</i> |
| SSGIC472815 | <i>Bombus</i> | <i>Bombus bifarius</i> |
| SSGIC473315 | <i>Bombus</i> | <i>Bombus bifarius</i> |
| SSGIC473415 | <i>Bombus</i> | <i>Bombus bifarius</i> |
| SSJAB114213 | <i>Bombus</i> | <i>Bombus bifarius</i> |
| SSJAB114313 | <i>Bombus</i> | <i>Bombus bifarius</i> |
| SSJAB15813  | <i>Bombus</i> | <i>Bombus bifarius</i> |
| SSJAC01013  | <i>Bombus</i> | <i>Bombus bifarius</i> |
| SSKUC14215  | <i>Bombus</i> | <i>Bombus bifarius</i> |
| SSKUC14415  | <i>Bombus</i> | <i>Bombus bifarius</i> |
| SSWLB361713 | <i>Bombus</i> | <i>Bombus bifarius</i> |

|              |               |                           |
|--------------|---------------|---------------------------|
| TTHYW20808   | <i>Bombus</i> | <i>Bombus bifarius</i>    |
| TTHYW30608   | <i>Bombus</i> | <i>Bombus bifarius</i>    |
| TTHYW30908   | <i>Bombus</i> | <i>Bombus bifarius</i>    |
| TTHYW36308   | <i>Bombus</i> | <i>Bombus bifarius</i>    |
| TTHYW38608   | <i>Bombus</i> | <i>Bombus bifarius</i>    |
| TTHYW38908   | <i>Bombus</i> | <i>Bombus bifarius</i>    |
| TTHYW54308   | <i>Bombus</i> | <i>Bombus bifarius</i>    |
| UAMIC73013   | <i>Bombus</i> | <i>Bombus bifarius</i>    |
| UAMIC73113   | <i>Bombus</i> | <i>Bombus bifarius</i>    |
| ASDHY01112   | <i>Bombus</i> | <i>Bombus bimaculatus</i> |
| ASGLE81710   | <i>Bombus</i> | <i>Bombus bimaculatus</i> |
| ASGLE83210   | <i>Bombus</i> | <i>Bombus bimaculatus</i> |
| BBHYG58310   | <i>Bombus</i> | <i>Bombus bimaculatus</i> |
| BBHYL24810   | <i>Bombus</i> | <i>Bombus bimaculatus</i> |
| BBHYN28211   | <i>Bombus</i> | <i>Bombus bimaculatus</i> |
| BEECA29906   | <i>Bombus</i> | <i>Bombus bimaculatus</i> |
| BEECC26508   | <i>Bombus</i> | <i>Bombus bimaculatus</i> |
| BEEMH03306   | <i>Bombus</i> | <i>Bombus bimaculatus</i> |
| BEEMH05706   | <i>Bombus</i> | <i>Bombus bimaculatus</i> |
| BEEMH12706   | <i>Bombus</i> | <i>Bombus bimaculatus</i> |
| BEEMH25106   | <i>Bombus</i> | <i>Bombus bimaculatus</i> |
| BEO00204     | <i>Bombus</i> | <i>Bombus bimaculatus</i> |
| BEO01404     | <i>Bombus</i> | <i>Bombus bimaculatus</i> |
| BEO06804     | <i>Bombus</i> | <i>Bombus bimaculatus</i> |
| BEO07604     | <i>Bombus</i> | <i>Bombus bimaculatus</i> |
| CNTIA141015  | <i>Bombus</i> | <i>Bombus bimaculatus</i> |
| ERPIR22012   | <i>Bombus</i> | <i>Bombus bimaculatus</i> |
| GBAH1701019  | <i>Bombus</i> | <i>Bombus bimaculatus</i> |
| GBMIN7193217 | <i>Bombus</i> | <i>Bombus bimaculatus</i> |
| GBMNA2181519 | <i>Bombus</i> | <i>Bombus bimaculatus</i> |
| GMGSB43312   | <i>Bombus</i> | <i>Bombus bimaculatus</i> |
| GMGSN27413   | <i>Bombus</i> | <i>Bombus bimaculatus</i> |
| HYMBB01409   | <i>Bombus</i> | <i>Bombus bimaculatus</i> |
| HYMBB01709   | <i>Bombus</i> | <i>Bombus bimaculatus</i> |
| POC03605     | <i>Bombus</i> | <i>Bombus bimaculatus</i> |
| SMTPB1013513 | <i>Bombus</i> | <i>Bombus bimaculatus</i> |
| SMTPB667613  | <i>Bombus</i> | <i>Bombus bimaculatus</i> |
| SMTPB902913  | <i>Bombus</i> | <i>Bombus bimaculatus</i> |
| SMTPF699014  | <i>Bombus</i> | <i>Bombus bimaculatus</i> |
| UPOLB20409   | <i>Bombus</i> | <i>Bombus bimaculatus</i> |
| UPOLB21809   | <i>Bombus</i> | <i>Bombus bimaculatus</i> |
| UPOLB36709   | <i>Bombus</i> | <i>Bombus bimaculatus</i> |
| UPOLB37209   | <i>Bombus</i> | <i>Bombus bimaculatus</i> |
| BEECA33506   | <i>Bombus</i> | <i>Bombus bohemicus</i>   |
| BEECA33606   | <i>Bombus</i> | <i>Bombus bohemicus</i>   |
| BEEEE09115   | <i>Bombus</i> | <i>Bombus bohemicus</i>   |

|              |               |                         |                       |
|--------------|---------------|-------------------------|-----------------------|
| BEEEE26116   | <i>Bombus</i> | <i>Bombus bohemicus</i> |                       |
| BEEEE29816   | <i>Bombus</i> | <i>Bombus bohemicus</i> |                       |
| BOWGF18208   | <i>Bombus</i> | <i>Bombus bohemicus</i> |                       |
| FBAPD62911   | <i>Bombus</i> | <i>Bombus bohemicus</i> |                       |
| FBHAP76509   | <i>Bombus</i> | <i>Bombus bohemicus</i> |                       |
| FBHAP76709   | <i>Bombus</i> | <i>Bombus bohemicus</i> |                       |
| FBHAP76809   | <i>Bombus</i> | <i>Bombus bohemicus</i> |                       |
| GBACU348613  | <i>Bombus</i> | <i>Bombus bohemicus</i> |                       |
| GBACU348713  | <i>Bombus</i> | <i>Bombus bohemicus</i> |                       |
| GBACU97912   | <i>Bombus</i> | <i>Bombus bohemicus</i> |                       |
| GBACU98012   | <i>Bombus</i> | <i>Bombus bohemicus</i> |                       |
| GBACU98112   | <i>Bombus</i> | <i>Bombus bohemicus</i> |                       |
| GBACU98212   | <i>Bombus</i> | <i>Bombus bohemicus</i> |                       |
| GBACU98312   | <i>Bombus</i> | <i>Bombus bohemicus</i> |                       |
| GBAH074206   | <i>Bombus</i> | <i>Bombus bohemicus</i> |                       |
| GBAH074306   | <i>Bombus</i> | <i>Bombus bohemicus</i> |                       |
| GBAH074406   | <i>Bombus</i> | <i>Bombus bohemicus</i> |                       |
| GBAH074506   | <i>Bombus</i> | <i>Bombus bohemicus</i> |                       |
| GBLGC00712   | <i>Bombus</i> | <i>Bombus bohemicus</i> |                       |
| GBMNB6226220 | <i>Bombus</i> | <i>Bombus bohemicus</i> |                       |
| GBSP020606   | <i>Bombus</i> | <i>Bombus bohemicus</i> |                       |
| GMGRB135413  | <i>Bombus</i> | <i>Bombus bohemicus</i> | <i>Bombus ashtoni</i> |
| HCBNS19403   | <i>Bombus</i> | <i>Bombus bohemicus</i> |                       |
| HCBNS19503   | <i>Bombus</i> | <i>Bombus bohemicus</i> |                       |
| HCBNS19603   | <i>Bombus</i> | <i>Bombus bohemicus</i> |                       |
| JSYKA16910   | <i>Bombus</i> | <i>Bombus bohemicus</i> | <i>Bombus ashtoni</i> |
| UAMIC73813   | <i>Bombus</i> | <i>Bombus bohemicus</i> |                       |
| UAMIC73913   | <i>Bombus</i> | <i>Bombus bohemicus</i> |                       |
| UAMIC74013   | <i>Bombus</i> | <i>Bombus bohemicus</i> |                       |
| BBHYB00412   | <i>Bombus</i> | <i>Bombus borealis</i>  |                       |
| BBHYL24310   | <i>Bombus</i> | <i>Bombus borealis</i>  |                       |
| BBHYL24510   | <i>Bombus</i> | <i>Bombus borealis</i>  |                       |
| BBWP10009    | <i>Bombus</i> | <i>Bombus borealis</i>  |                       |
| BBWP10109    | <i>Bombus</i> | <i>Bombus borealis</i>  |                       |
| BBWP10209    | <i>Bombus</i> | <i>Bombus borealis</i>  |                       |
| BBWP10309    | <i>Bombus</i> | <i>Bombus borealis</i>  |                       |
| BBWP38310    | <i>Bombus</i> | <i>Bombus borealis</i>  |                       |
| BEECA40506   | <i>Bombus</i> | <i>Bombus borealis</i>  |                       |
| CNEIC296212  | <i>Bombus</i> | <i>Bombus borealis</i>  |                       |
| CNFNE275214  | <i>Bombus</i> | <i>Bombus borealis</i>  |                       |
| CNFNQ72914   | <i>Bombus</i> | <i>Bombus borealis</i>  |                       |
| CNGRF40312   | <i>Bombus</i> | <i>Bombus borealis</i>  |                       |
| CNGSF391315  | <i>Bombus</i> | <i>Bombus borealis</i>  |                       |
| CNGSH187715  | <i>Bombus</i> | <i>Bombus borealis</i>  |                       |
| CNTIA140915  | <i>Bombus</i> | <i>Bombus borealis</i>  |                       |
| HCBNS11003   | <i>Bombus</i> | <i>Bombus borealis</i>  |                       |

|              |               |                              |
|--------------|---------------|------------------------------|
| HCBNS11103   | <i>Bombus</i> | <i>Bombus borealis</i>       |
| HCBNS11203   | <i>Bombus</i> | <i>Bombus borealis</i>       |
| HCBNS11303   | <i>Bombus</i> | <i>Bombus borealis</i>       |
| HEAUG182912  | <i>Bombus</i> | <i>Bombus borealis</i>       |
| GBMNB6298020 | <i>Bombus</i> | <i>Bombus brachycephalus</i> |
| GBMNB6298120 | <i>Bombus</i> | <i>Bombus brachycephalus</i> |
| GBMNB6298220 | <i>Bombus</i> | <i>Bombus brachycephalus</i> |
| ASBEE02908   | <i>Bombus</i> | <i>Bombus brasiliensis</i>   |
| ASBEE03208   | <i>Bombus</i> | <i>Bombus brasiliensis</i>   |
| ASBEE03408   | <i>Bombus</i> | <i>Bombus brasiliensis</i>   |
| ASBEE12108   | <i>Bombus</i> | <i>Bombus brasiliensis</i>   |
| ASBEE12308   | <i>Bombus</i> | <i>Bombus brasiliensis</i>   |
| ASBEE12408   | <i>Bombus</i> | <i>Bombus brasiliensis</i>   |
| ASBEE12608   | <i>Bombus</i> | <i>Bombus brasiliensis</i>   |
| ASBEE12708   | <i>Bombus</i> | <i>Bombus brasiliensis</i>   |
| ASBEE12808   | <i>Bombus</i> | <i>Bombus brasiliensis</i>   |
| GBAH1075415  | <i>Bombus</i> | <i>Bombus brasiliensis</i>   |
| GBAH1075515  | <i>Bombus</i> | <i>Bombus brasiliensis</i>   |
| GBAH1075615  | <i>Bombus</i> | <i>Bombus brasiliensis</i>   |
| GBAH1075715  | <i>Bombus</i> | <i>Bombus brasiliensis</i>   |
| GBAH1075815  | <i>Bombus</i> | <i>Bombus brasiliensis</i>   |
| GBAH1075915  | <i>Bombus</i> | <i>Bombus brasiliensis</i>   |
| GBAH1076015  | <i>Bombus</i> | <i>Bombus brasiliensis</i>   |
| GBAH1076115  | <i>Bombus</i> | <i>Bombus brasiliensis</i>   |
| GBAH1076215  | <i>Bombus</i> | <i>Bombus brasiliensis</i>   |
| GBAH1076315  | <i>Bombus</i> | <i>Bombus brasiliensis</i>   |
| GBAH1076415  | <i>Bombus</i> | <i>Bombus brasiliensis</i>   |
| GBAH1076515  | <i>Bombus</i> | <i>Bombus brasiliensis</i>   |
| GBAH1076615  | <i>Bombus</i> | <i>Bombus brasiliensis</i>   |
| GBAH1076715  | <i>Bombus</i> | <i>Bombus brasiliensis</i>   |
| GBAH1076815  | <i>Bombus</i> | <i>Bombus brasiliensis</i>   |
| GBAH1076915  | <i>Bombus</i> | <i>Bombus brasiliensis</i>   |
| GBAH1077015  | <i>Bombus</i> | <i>Bombus brasiliensis</i>   |
| GBAH1077115  | <i>Bombus</i> | <i>Bombus brasiliensis</i>   |
| GBAH1077215  | <i>Bombus</i> | <i>Bombus brasiliensis</i>   |
| GBAH1077315  | <i>Bombus</i> | <i>Bombus brasiliensis</i>   |
| GBAH1077415  | <i>Bombus</i> | <i>Bombus brasiliensis</i>   |
| GBAH1077515  | <i>Bombus</i> | <i>Bombus brasiliensis</i>   |
| GBAH1077615  | <i>Bombus</i> | <i>Bombus brasiliensis</i>   |
| GBAH1077715  | <i>Bombus</i> | <i>Bombus brasiliensis</i>   |
| GBAH1077815  | <i>Bombus</i> | <i>Bombus brasiliensis</i>   |
| GBAH1077915  | <i>Bombus</i> | <i>Bombus brasiliensis</i>   |
| GBAH1078015  | <i>Bombus</i> | <i>Bombus brasiliensis</i>   |
| GBAH1078115  | <i>Bombus</i> | <i>Bombus brasiliensis</i>   |
| GBAH1078215  | <i>Bombus</i> | <i>Bombus brasiliensis</i>   |
| GBAH1078315  | <i>Bombus</i> | <i>Bombus brasiliensis</i>   |

|             |               |                            |
|-------------|---------------|----------------------------|
| GBAH1078415 | <i>Bombus</i> | <i>Bombus brasiliensis</i> |
| GBAH1078515 | <i>Bombus</i> | <i>Bombus brasiliensis</i> |
| GBAH1078615 | <i>Bombus</i> | <i>Bombus brasiliensis</i> |
| GBAH1078715 | <i>Bombus</i> | <i>Bombus brasiliensis</i> |
| GBAH1078815 | <i>Bombus</i> | <i>Bombus brasiliensis</i> |
| GBAH1078915 | <i>Bombus</i> | <i>Bombus brasiliensis</i> |
| GBAH1079015 | <i>Bombus</i> | <i>Bombus brasiliensis</i> |
| GBAH1079115 | <i>Bombus</i> | <i>Bombus brasiliensis</i> |
| GBAH1079215 | <i>Bombus</i> | <i>Bombus brasiliensis</i> |
| GBAH1079315 | <i>Bombus</i> | <i>Bombus brasiliensis</i> |
| GBAH1079415 | <i>Bombus</i> | <i>Bombus brasiliensis</i> |
| GBAH1079515 | <i>Bombus</i> | <i>Bombus brasiliensis</i> |
| GBAH1079615 | <i>Bombus</i> | <i>Bombus brasiliensis</i> |
| GBAH1079715 | <i>Bombus</i> | <i>Bombus brasiliensis</i> |
| GBAH1079815 | <i>Bombus</i> | <i>Bombus brasiliensis</i> |
| GBAH1079915 | <i>Bombus</i> | <i>Bombus brasiliensis</i> |
| GBAH1080015 | <i>Bombus</i> | <i>Bombus brasiliensis</i> |
| GBAH1080115 | <i>Bombus</i> | <i>Bombus brasiliensis</i> |
| GBAH1080215 | <i>Bombus</i> | <i>Bombus brasiliensis</i> |
| GBAH1080315 | <i>Bombus</i> | <i>Bombus brasiliensis</i> |
| GBAH1080415 | <i>Bombus</i> | <i>Bombus brasiliensis</i> |
| GBAH1080515 | <i>Bombus</i> | <i>Bombus brasiliensis</i> |
| GBAH1080615 | <i>Bombus</i> | <i>Bombus brasiliensis</i> |
| GBAH1080715 | <i>Bombus</i> | <i>Bombus brasiliensis</i> |
| GBAH1080815 | <i>Bombus</i> | <i>Bombus brasiliensis</i> |
| GBAH1080915 | <i>Bombus</i> | <i>Bombus brasiliensis</i> |
| GBAH1081015 | <i>Bombus</i> | <i>Bombus brasiliensis</i> |
| GBAH1081115 | <i>Bombus</i> | <i>Bombus brasiliensis</i> |
| GBAH1081215 | <i>Bombus</i> | <i>Bombus brasiliensis</i> |
| GBAH1081315 | <i>Bombus</i> | <i>Bombus brasiliensis</i> |
| GBAH1081415 | <i>Bombus</i> | <i>Bombus brasiliensis</i> |
| GBAH1081515 | <i>Bombus</i> | <i>Bombus brasiliensis</i> |
| GBAH1081615 | <i>Bombus</i> | <i>Bombus brasiliensis</i> |
| GBAH1081715 | <i>Bombus</i> | <i>Bombus brasiliensis</i> |
| GBAH1081815 | <i>Bombus</i> | <i>Bombus brasiliensis</i> |
| GBAH1081915 | <i>Bombus</i> | <i>Bombus brasiliensis</i> |
| GBAH1082015 | <i>Bombus</i> | <i>Bombus brasiliensis</i> |
| GBAH1082115 | <i>Bombus</i> | <i>Bombus brasiliensis</i> |
| GBAH1082215 | <i>Bombus</i> | <i>Bombus brasiliensis</i> |
| GBAH1082315 | <i>Bombus</i> | <i>Bombus brasiliensis</i> |
| GBAH1082415 | <i>Bombus</i> | <i>Bombus brasiliensis</i> |
| GBAH1082515 | <i>Bombus</i> | <i>Bombus brasiliensis</i> |
| GBAH1082615 | <i>Bombus</i> | <i>Bombus brasiliensis</i> |
| GBAH1082715 | <i>Bombus</i> | <i>Bombus brasiliensis</i> |
| GBAH1082815 | <i>Bombus</i> | <i>Bombus brasiliensis</i> |
| GBAH1082915 | <i>Bombus</i> | <i>Bombus brasiliensis</i> |

|             |               |                            |
|-------------|---------------|----------------------------|
| GBAH1083015 | <i>Bombus</i> | <i>Bombus brasiliensis</i> |
| GBAH1083115 | <i>Bombus</i> | <i>Bombus brasiliensis</i> |
| GBAH1083215 | <i>Bombus</i> | <i>Bombus brasiliensis</i> |
| GBAH1083315 | <i>Bombus</i> | <i>Bombus brasiliensis</i> |
| GBAH1083415 | <i>Bombus</i> | <i>Bombus brasiliensis</i> |
| GBAH1083515 | <i>Bombus</i> | <i>Bombus brasiliensis</i> |
| GBAH1083615 | <i>Bombus</i> | <i>Bombus brasiliensis</i> |
| GBAH1083715 | <i>Bombus</i> | <i>Bombus brasiliensis</i> |
| GBAH1083815 | <i>Bombus</i> | <i>Bombus brasiliensis</i> |
| GBAH1083915 | <i>Bombus</i> | <i>Bombus brasiliensis</i> |
| GBAH1084015 | <i>Bombus</i> | <i>Bombus brasiliensis</i> |
| GBAH1084115 | <i>Bombus</i> | <i>Bombus brasiliensis</i> |
| GBAH1084215 | <i>Bombus</i> | <i>Bombus brasiliensis</i> |
| GBAH1084315 | <i>Bombus</i> | <i>Bombus brasiliensis</i> |
| GBAH1084415 | <i>Bombus</i> | <i>Bombus brasiliensis</i> |
| GBAH1084515 | <i>Bombus</i> | <i>Bombus brasiliensis</i> |
| GBAH1084615 | <i>Bombus</i> | <i>Bombus brasiliensis</i> |
| GBAH1084715 | <i>Bombus</i> | <i>Bombus brasiliensis</i> |
| GBAH1084815 | <i>Bombus</i> | <i>Bombus brasiliensis</i> |
| GBAH1084915 | <i>Bombus</i> | <i>Bombus brasiliensis</i> |
| GBAH1085015 | <i>Bombus</i> | <i>Bombus brasiliensis</i> |
| GBAH1085115 | <i>Bombus</i> | <i>Bombus brasiliensis</i> |
| GBAH1085215 | <i>Bombus</i> | <i>Bombus brasiliensis</i> |
| GBAH1085315 | <i>Bombus</i> | <i>Bombus brasiliensis</i> |
| GBAH1085415 | <i>Bombus</i> | <i>Bombus brasiliensis</i> |
| GBAH1085515 | <i>Bombus</i> | <i>Bombus brasiliensis</i> |
| GBAH1085615 | <i>Bombus</i> | <i>Bombus brasiliensis</i> |
| GBAH1085715 | <i>Bombus</i> | <i>Bombus brasiliensis</i> |
| GBAH1085815 | <i>Bombus</i> | <i>Bombus brasiliensis</i> |
| GBAH1085915 | <i>Bombus</i> | <i>Bombus brasiliensis</i> |
| GBAH1086015 | <i>Bombus</i> | <i>Bombus brasiliensis</i> |
| GBAH1086115 | <i>Bombus</i> | <i>Bombus brasiliensis</i> |
| GBAH1086215 | <i>Bombus</i> | <i>Bombus brasiliensis</i> |
| GBAH1086315 | <i>Bombus</i> | <i>Bombus brasiliensis</i> |
| GBAH1086415 | <i>Bombus</i> | <i>Bombus brasiliensis</i> |
| GBAH1086515 | <i>Bombus</i> | <i>Bombus brasiliensis</i> |
| GBAH1086615 | <i>Bombus</i> | <i>Bombus brasiliensis</i> |
| GBAH1086715 | <i>Bombus</i> | <i>Bombus brasiliensis</i> |
| GBAH1086815 | <i>Bombus</i> | <i>Bombus brasiliensis</i> |
| GBAH1086915 | <i>Bombus</i> | <i>Bombus brasiliensis</i> |
| GBAH1087015 | <i>Bombus</i> | <i>Bombus brasiliensis</i> |
| GBAH1087115 | <i>Bombus</i> | <i>Bombus brasiliensis</i> |
| GBAH1087215 | <i>Bombus</i> | <i>Bombus brasiliensis</i> |
| GBAH1087315 | <i>Bombus</i> | <i>Bombus brasiliensis</i> |
| GBAH1087415 | <i>Bombus</i> | <i>Bombus brasiliensis</i> |
| GBAH1087515 | <i>Bombus</i> | <i>Bombus brasiliensis</i> |



|             |               |                            |
|-------------|---------------|----------------------------|
| GBAH1087615 | <i>Bombus</i> | <i>Bombus brasiliensis</i> |
| GBAH1087715 | <i>Bombus</i> | <i>Bombus brasiliensis</i> |
| GBAH1087815 | <i>Bombus</i> | <i>Bombus brasiliensis</i> |
| GBAH1087915 | <i>Bombus</i> | <i>Bombus brasiliensis</i> |
| GBAH1088015 | <i>Bombus</i> | <i>Bombus brasiliensis</i> |
| GBAH1088115 | <i>Bombus</i> | <i>Bombus brasiliensis</i> |
| GBAH1088215 | <i>Bombus</i> | <i>Bombus brasiliensis</i> |
| GBAH1088315 | <i>Bombus</i> | <i>Bombus brasiliensis</i> |
| GBAH1088415 | <i>Bombus</i> | <i>Bombus brasiliensis</i> |
| GBAH1088515 | <i>Bombus</i> | <i>Bombus brasiliensis</i> |
| GBAH1088615 | <i>Bombus</i> | <i>Bombus brasiliensis</i> |
| GBAH1088715 | <i>Bombus</i> | <i>Bombus brasiliensis</i> |
| GBAH1088815 | <i>Bombus</i> | <i>Bombus brasiliensis</i> |
| GBAH1088915 | <i>Bombus</i> | <i>Bombus brasiliensis</i> |
| GBAH1089015 | <i>Bombus</i> | <i>Bombus brasiliensis</i> |
| GBAH1089115 | <i>Bombus</i> | <i>Bombus brasiliensis</i> |
| GBAH1089215 | <i>Bombus</i> | <i>Bombus brasiliensis</i> |
| GBAH1089315 | <i>Bombus</i> | <i>Bombus brasiliensis</i> |
| GBAH1089415 | <i>Bombus</i> | <i>Bombus brasiliensis</i> |
| GBAH1089515 | <i>Bombus</i> | <i>Bombus brasiliensis</i> |
| GBAH1582919 | <i>Bombus</i> | <i>Bombus brasiliensis</i> |
| GBAH1652519 | <i>Bombus</i> | <i>Bombus brasiliensis</i> |
| GBAH1652619 | <i>Bombus</i> | <i>Bombus brasiliensis</i> |
| GBAH1652719 | <i>Bombus</i> | <i>Bombus brasiliensis</i> |
| LASNA33408  | <i>Bombus</i> | <i>Bombus brasiliensis</i> |
| LASNA42808  | <i>Bombus</i> | <i>Bombus brasiliensis</i> |
| GBAH1089615 | <i>Bombus</i> | <i>Bombus breviceps</i>    |
| GBAH1089715 | <i>Bombus</i> | <i>Bombus breviceps</i>    |
| GBAH1810619 | <i>Bombus</i> | <i>Bombus breviceps</i>    |
| GBAH1816919 | <i>Bombus</i> | <i>Bombus breviceps</i>    |
| GBAH1818319 | <i>Bombus</i> | <i>Bombus breviceps</i>    |
| GBAH1818419 | <i>Bombus</i> | <i>Bombus breviceps</i>    |
| GBAH1818819 | <i>Bombus</i> | <i>Bombus breviceps</i>    |
| GBAH1818919 | <i>Bombus</i> | <i>Bombus breviceps</i>    |
| GBAH1819019 | <i>Bombus</i> | <i>Bombus breviceps</i>    |
| GBAH1819319 | <i>Bombus</i> | <i>Bombus breviceps</i>    |
| GBAH1819919 | <i>Bombus</i> | <i>Bombus breviceps</i>    |
| GBAH705510  | <i>Bombus</i> | <i>Bombus breviceps</i>    |
| GBAH705610  | <i>Bombus</i> | <i>Bombus breviceps</i>    |
| GBAH705710  | <i>Bombus</i> | <i>Bombus breviceps</i>    |
| GBAH705810  | <i>Bombus</i> | <i>Bombus breviceps</i>    |
| GBAH705910  | <i>Bombus</i> | <i>Bombus breviceps</i>    |
| GBAH1089815 | <i>Bombus</i> | <i>Bombus brevivillus</i>  |
| GBAH1089915 | <i>Bombus</i> | <i>Bombus brevivillus</i>  |
| GBAH1090015 | <i>Bombus</i> | <i>Bombus brevivillus</i>  |
| GBAH1090115 | <i>Bombus</i> | <i>Bombus brevivillus</i>  |

|              |               |                            |                                     |
|--------------|---------------|----------------------------|-------------------------------------|
| GBAH1090215  | <i>Bombus</i> | <i>Bombus brevivillus</i>  |                                     |
| GBAH1583019  | <i>Bombus</i> | <i>Bombus brevivillus</i>  |                                     |
| GBAH1653019  | <i>Bombus</i> | <i>Bombus brevivillus</i>  | <i>Bombus applanatus</i>            |
| GBAH1653119  | <i>Bombus</i> | <i>Bombus brevivillus</i>  | <i>Bombus applanatus</i>            |
| GBAH1653219  | <i>Bombus</i> | <i>Bombus brevivillus</i>  | <i>Bombus applanatus</i>            |
| GBAH1653319  | <i>Bombus</i> | <i>Bombus brevivillus</i>  | <i>Bombus applanatus</i>            |
| GBAH1653419  | <i>Bombus</i> | <i>Bombus brevivillus</i>  | <i>Bombus applanatus</i>            |
| GBAH1653519  | <i>Bombus</i> | <i>Bombus brevivillus</i>  | <i>Bombus applanatus</i>            |
| GBAH1653619  | <i>Bombus</i> | <i>Bombus brevivillus</i>  | <i>Bombus applanatus</i>            |
| GBAH1653719  | <i>Bombus</i> | <i>Bombus brevivillus</i>  | <i>Bombus applanatus</i>            |
| GBAH1653819  | <i>Bombus</i> | <i>Bombus brevivillus</i>  | <i>Bombus applanatus</i>            |
| GBAH1653919  | <i>Bombus</i> | <i>Bombus brevivillus</i>  | <i>Bombus applanatus</i>            |
| GBAH1654019  | <i>Bombus</i> | <i>Bombus brevivillus</i>  | <i>Bombus applanatus</i>            |
| GBAH1654119  | <i>Bombus</i> | <i>Bombus brevivillus</i>  | <i>Bombus applanatus</i>            |
| GBAH1654219  | <i>Bombus</i> | <i>Bombus brevivillus</i>  | <i>Bombus applanatus</i>            |
| GBMAB71015   | <i>Bombus</i> | <i>Bombus brodmannicus</i> |                                     |
| GBMAB71215   | <i>Bombus</i> | <i>Bombus brodmannicus</i> |                                     |
| GBMAB71415   | <i>Bombus</i> | <i>Bombus brodmannicus</i> |                                     |
| GBMAB71615   | <i>Bombus</i> | <i>Bombus brodmannicus</i> |                                     |
| GBMAB71815   | <i>Bombus</i> | <i>Bombus brodmannicus</i> |                                     |
| BEEEE30816   | <i>Bombus</i> | <i>Bombus campestris</i>   |                                     |
| FBHAP76909   | <i>Bombus</i> | <i>Bombus campestris</i>   |                                     |
| FBHAP77009   | <i>Bombus</i> | <i>Bombus campestris</i>   |                                     |
| FBHAP77109   | <i>Bombus</i> | <i>Bombus campestris</i>   |                                     |
| FBHAP77209   | <i>Bombus</i> | <i>Bombus campestris</i>   |                                     |
| GBACU212813  | <i>Bombus</i> | <i>Bombus campestris</i>   |                                     |
| GBACU348513  | <i>Bombus</i> | <i>Bombus campestris</i>   |                                     |
| GBAH074606   | <i>Bombus</i> | <i>Bombus campestris</i>   |                                     |
| GBAH074706   | <i>Bombus</i> | <i>Bombus campestris</i>   |                                     |
| GBMIN7193317 | <i>Bombus</i> | <i>Bombus campestris</i>   |                                     |
| GBHAP91214   | <i>Bombus</i> | <i>Bombus caucasicus</i>   | <i>Bombus lapidarius caucasicus</i> |
| GBHAP91314   | <i>Bombus</i> | <i>Bombus caucasicus</i>   | <i>Bombus lapidarius caucasicus</i> |
| GBHAP91414   | <i>Bombus</i> | <i>Bombus caucasicus</i>   | <i>Bombus lapidarius caucasicus</i> |
| GBHAP91514   | <i>Bombus</i> | <i>Bombus caucasicus</i>   | <i>Bombus lapidarius caucasicus</i> |
| GBHAP91614   | <i>Bombus</i> | <i>Bombus caucasicus</i>   | <i>Bombus lapidarius caucasicus</i> |
| BBHYG57410   | <i>Bombus</i> | <i>Bombus centralis</i>    |                                     |
| BEECC84509   | <i>Bombus</i> | <i>Bombus centralis</i>    |                                     |
| BEECC84609   | <i>Bombus</i> | <i>Bombus centralis</i>    |                                     |
| NGAAC203614  | <i>Bombus</i> | <i>Bombus centralis</i>    |                                     |
| NGAAC206514  | <i>Bombus</i> | <i>Bombus centralis</i>    |                                     |
| NGAAC208714  | <i>Bombus</i> | <i>Bombus centralis</i>    |                                     |
| NGAAC209814  | <i>Bombus</i> | <i>Bombus centralis</i>    |                                     |
| NGNAC306213  | <i>Bombus</i> | <i>Bombus centralis</i>    |                                     |
| NGNAS137514  | <i>Bombus</i> | <i>Bombus centralis</i>    |                                     |
| NGNAX202414  | <i>Bombus</i> | <i>Bombus centralis</i>    |                                     |
| SSWLE555013  | <i>Bombus</i> | <i>Bombus centralis</i>    |                                     |

|             |               |                           |                         |
|-------------|---------------|---------------------------|-------------------------|
| GBAH035306  | <i>Bombus</i> | <i>Bombus cingulatus</i>  |                         |
| GBAH035406  | <i>Bombus</i> | <i>Bombus cingulatus</i>  |                         |
| GBAH035506  | <i>Bombus</i> | <i>Bombus cingulatus</i>  |                         |
| GBAH035606  | <i>Bombus</i> | <i>Bombus cingulatus</i>  |                         |
| GBAH040806  | <i>Bombus</i> | <i>Bombus cingulatus</i>  |                         |
| ASGCB21513  | <i>Bombus</i> | <i>Bombus citrinus</i>    |                         |
| BEECA44206  | <i>Bombus</i> | <i>Bombus citrinus</i>    |                         |
| BEECA44306  | <i>Bombus</i> | <i>Bombus citrinus</i>    |                         |
| BEEMH16806  | <i>Bombus</i> | <i>Bombus citrinus</i>    |                         |
| BEO04904    | <i>Bombus</i> | <i>Bombus citrinus</i>    |                         |
| CNBRM21614  | <i>Bombus</i> | <i>Bombus citrinus</i>    |                         |
| CNPED13014  | <i>Bombus</i> | <i>Bombus citrinus</i>    |                         |
| CNPEE12914  | <i>Bombus</i> | <i>Bombus citrinus</i>    |                         |
| CNPEE13014  | <i>Bombus</i> | <i>Bombus citrinus</i>    |                         |
| CNTNE123314 | <i>Bombus</i> | <i>Bombus citrinus</i>    |                         |
| HCBNS12103  | <i>Bombus</i> | <i>Bombus citrinus</i>    |                         |
| HCBNS12203  | <i>Bombus</i> | <i>Bombus citrinus</i>    |                         |
| HCBNS12303  | <i>Bombus</i> | <i>Bombus citrinus</i>    |                         |
| HCBNS12503  | <i>Bombus</i> | <i>Bombus citrinus</i>    |                         |
| HCBNS12603  | <i>Bombus</i> | <i>Bombus citrinus</i>    |                         |
| HPPPL58213  | <i>Bombus</i> | <i>Bombus citrinus</i>    |                         |
| QUEBE00606  | <i>Bombus</i> | <i>Bombus citrinus</i>    |                         |
| RBINA502813 | <i>Bombus</i> | <i>Bombus citrinus</i>    |                         |
| RRMFG265815 | <i>Bombus</i> | <i>Bombus citrinus</i>    |                         |
| SMTPJ47114  | <i>Bombus</i> | <i>Bombus citrinus</i>    |                         |
| SMTPJ48914  | <i>Bombus</i> | <i>Bombus citrinus</i>    |                         |
| UPOLB43209  | <i>Bombus</i> | <i>Bombus citrinus</i>    |                         |
| UPOLB43309  | <i>Bombus</i> | <i>Bombus citrinus</i>    |                         |
| FBAPD70111  | <i>Bombus</i> | <i>Bombus confusus</i>    |                         |
| FBAPD70211  | <i>Bombus</i> | <i>Bombus confusus</i>    |                         |
| GBAH066206  | <i>Bombus</i> | <i>Bombus confusus</i>    |                         |
| BBWP53510   | <i>Bombus</i> | <i>Bombus consobrinus</i> |                         |
| GBAH033006  | <i>Bombus</i> | <i>Bombus consobrinus</i> |                         |
| GBAH033106  | <i>Bombus</i> | <i>Bombus consobrinus</i> |                         |
| GBAH033206  | <i>Bombus</i> | <i>Bombus consobrinus</i> |                         |
| GBAH033306  | <i>Bombus</i> | <i>Bombus consobrinus</i> |                         |
| GBAH033806  | <i>Bombus</i> | <i>Bombus consobrinus</i> | <i>Bombus yezoensis</i> |
| GBAH039506  | <i>Bombus</i> | <i>Bombus consobrinus</i> |                         |
| GBAH040206  | <i>Bombus</i> | <i>Bombus consobrinus</i> |                         |
| GBAH040406  | <i>Bombus</i> | <i>Bombus consobrinus</i> | <i>Bombus yezoensis</i> |
| GBAH066306  | <i>Bombus</i> | <i>Bombus consobrinus</i> |                         |
| GBAH1669319 | <i>Bombus</i> | <i>Bombus consobrinus</i> |                         |
| GBAH1785619 | <i>Bombus</i> | <i>Bombus consobrinus</i> |                         |
| GBAH1785719 | <i>Bombus</i> | <i>Bombus consobrinus</i> |                         |
| GBAH709910  | <i>Bombus</i> | <i>Bombus consobrinus</i> |                         |
| GBMAB72015  | <i>Bombus</i> | <i>Bombus consobrinus</i> |                         |

|              |               |                           |
|--------------|---------------|---------------------------|
| GBMAB72215   | <i>Bombus</i> | <i>Bombus consobrinus</i> |
| GBMAB72415   | <i>Bombus</i> | <i>Bombus consobrinus</i> |
| GBMAB72615   | <i>Bombus</i> | <i>Bombus consobrinus</i> |
| GBMAB72815   | <i>Bombus</i> | <i>Bombus consobrinus</i> |
| GBMAB73015   | <i>Bombus</i> | <i>Bombus consobrinus</i> |
| GBMAB73215   | <i>Bombus</i> | <i>Bombus consobrinus</i> |
| GBMAB73415   | <i>Bombus</i> | <i>Bombus consobrinus</i> |
| GBMAB73515   | <i>Bombus</i> | <i>Bombus consobrinus</i> |
| GBMAB73615   | <i>Bombus</i> | <i>Bombus consobrinus</i> |
| GBMAB73815   | <i>Bombus</i> | <i>Bombus consobrinus</i> |
| GBMAB74015   | <i>Bombus</i> | <i>Bombus consobrinus</i> |
| GBMAB74215   | <i>Bombus</i> | <i>Bombus consobrinus</i> |
| GBMAB74315   | <i>Bombus</i> | <i>Bombus consobrinus</i> |
| GBMAB74515   | <i>Bombus</i> | <i>Bombus consobrinus</i> |
| GBMAB74715   | <i>Bombus</i> | <i>Bombus consobrinus</i> |
| GBMAB74915   | <i>Bombus</i> | <i>Bombus consobrinus</i> |
| GBMAB75115   | <i>Bombus</i> | <i>Bombus consobrinus</i> |
| GBMAB75315   | <i>Bombus</i> | <i>Bombus consobrinus</i> |
| GBMIN7193417 | <i>Bombus</i> | <i>Bombus consobrinus</i> |
| GBMIN7193517 | <i>Bombus</i> | <i>Bombus consobrinus</i> |
| GBMIN7193617 | <i>Bombus</i> | <i>Bombus consobrinus</i> |
| GBMIN7193717 | <i>Bombus</i> | <i>Bombus consobrinus</i> |
| GBMIN7193817 | <i>Bombus</i> | <i>Bombus consobrinus</i> |
| GBMIN7193917 | <i>Bombus</i> | <i>Bombus consobrinus</i> |
| GBMIN7194017 | <i>Bombus</i> | <i>Bombus consobrinus</i> |
| GBMIN7194117 | <i>Bombus</i> | <i>Bombus consobrinus</i> |
| GBMIN7194217 | <i>Bombus</i> | <i>Bombus consobrinus</i> |
| GBMIN7194317 | <i>Bombus</i> | <i>Bombus consobrinus</i> |
| GBMIN7194417 | <i>Bombus</i> | <i>Bombus consobrinus</i> |
| GBMIN7194517 | <i>Bombus</i> | <i>Bombus consobrinus</i> |
| GBMIN7194617 | <i>Bombus</i> | <i>Bombus consobrinus</i> |
| GBMIN7194717 | <i>Bombus</i> | <i>Bombus consobrinus</i> |
| BBHYA08812   | <i>Bombus</i> | <i>Bombus crotchii</i>    |
| BEECC37908   | <i>Bombus</i> | <i>Bombus crotchii</i>    |
| ADBEE05112   | <i>Bombus</i> | <i>Bombus crotchii</i>    |
| ADBEE05212   | <i>Bombus</i> | <i>Bombus crotchii</i>    |
| BBBO02210    | <i>Bombus</i> | <i>Bombus cryptarum</i>   |
| BBBO02310    | <i>Bombus</i> | <i>Bombus cryptarum</i>   |
| BBBO02410    | <i>Bombus</i> | <i>Bombus cryptarum</i>   |
| BBBO02510    | <i>Bombus</i> | <i>Bombus cryptarum</i>   |
| BBBO03710    | <i>Bombus</i> | <i>Bombus cryptarum</i>   |
| BBBO03810    | <i>Bombus</i> | <i>Bombus cryptarum</i>   |
| BBBO03910    | <i>Bombus</i> | <i>Bombus cryptarum</i>   |
| BBBO04010    | <i>Bombus</i> | <i>Bombus cryptarum</i>   |
| BBBO04110    | <i>Bombus</i> | <i>Bombus cryptarum</i>   |
| BBBO04710    | <i>Bombus</i> | <i>Bombus cryptarum</i>   |

|            |               |                         |
|------------|---------------|-------------------------|
| BBBO04810  | <i>Bombus</i> | <i>Bombus cryptarum</i> |
| BBBO05210  | <i>Bombus</i> | <i>Bombus cryptarum</i> |
| BBBO05310  | <i>Bombus</i> | <i>Bombus cryptarum</i> |
| BBBO05410  | <i>Bombus</i> | <i>Bombus cryptarum</i> |
| BBBO05610  | <i>Bombus</i> | <i>Bombus cryptarum</i> |
| BBBO06110  | <i>Bombus</i> | <i>Bombus cryptarum</i> |
| BBBO06210  | <i>Bombus</i> | <i>Bombus cryptarum</i> |
| BBBO06310  | <i>Bombus</i> | <i>Bombus cryptarum</i> |
| BBBO07310  | <i>Bombus</i> | <i>Bombus cryptarum</i> |
| BBBO07410  | <i>Bombus</i> | <i>Bombus cryptarum</i> |
| BBBO07510  | <i>Bombus</i> | <i>Bombus cryptarum</i> |
| BBBO10910  | <i>Bombus</i> | <i>Bombus cryptarum</i> |
| BBBO14910  | <i>Bombus</i> | <i>Bombus cryptarum</i> |
| BBBO15010  | <i>Bombus</i> | <i>Bombus cryptarum</i> |
| BBBO20310  | <i>Bombus</i> | <i>Bombus cryptarum</i> |
| BBBO20410  | <i>Bombus</i> | <i>Bombus cryptarum</i> |
| BBBO23910  | <i>Bombus</i> | <i>Bombus cryptarum</i> |
| BBBO24010  | <i>Bombus</i> | <i>Bombus cryptarum</i> |
| BBBO24710  | <i>Bombus</i> | <i>Bombus cryptarum</i> |
| BBBO25010  | <i>Bombus</i> | <i>Bombus cryptarum</i> |
| BBBO25110  | <i>Bombus</i> | <i>Bombus cryptarum</i> |
| BBBO30810  | <i>Bombus</i> | <i>Bombus cryptarum</i> |
| BBBO34410  | <i>Bombus</i> | <i>Bombus cryptarum</i> |
| BBBO34910  | <i>Bombus</i> | <i>Bombus cryptarum</i> |
| BBBO35810  | <i>Bombus</i> | <i>Bombus cryptarum</i> |
| BBBO35910  | <i>Bombus</i> | <i>Bombus cryptarum</i> |
| BBBO36010  | <i>Bombus</i> | <i>Bombus cryptarum</i> |
| BBBO36110  | <i>Bombus</i> | <i>Bombus cryptarum</i> |
| BBBO36210  | <i>Bombus</i> | <i>Bombus cryptarum</i> |
| BBBO42711  | <i>Bombus</i> | <i>Bombus cryptarum</i> |
| BBBO42811  | <i>Bombus</i> | <i>Bombus cryptarum</i> |
| BBBO46711  | <i>Bombus</i> | <i>Bombus cryptarum</i> |
| BBBO46911  | <i>Bombus</i> | <i>Bombus cryptarum</i> |
| BBBO47211  | <i>Bombus</i> | <i>Bombus cryptarum</i> |
| BBBO47311  | <i>Bombus</i> | <i>Bombus cryptarum</i> |
| BBBO47511  | <i>Bombus</i> | <i>Bombus cryptarum</i> |
| BBWP54610  | <i>Bombus</i> | <i>Bombus cryptarum</i> |
| BBWP54710  | <i>Bombus</i> | <i>Bombus cryptarum</i> |
| BEECA80607 | <i>Bombus</i> | <i>Bombus cryptarum</i> |
| BEECB60707 | <i>Bombus</i> | <i>Bombus cryptarum</i> |
| BEECB61207 | <i>Bombus</i> | <i>Bombus cryptarum</i> |
| BEEEE11715 | <i>Bombus</i> | <i>Bombus cryptarum</i> |
| DIMC07509  | <i>Bombus</i> | <i>Bombus cryptarum</i> |
| FBAPD63611 | <i>Bombus</i> | <i>Bombus cryptarum</i> |
| FBAPD63711 | <i>Bombus</i> | <i>Bombus cryptarum</i> |
| FBAPD63811 | <i>Bombus</i> | <i>Bombus cryptarum</i> |

|              |               |                         |                          |
|--------------|---------------|-------------------------|--------------------------|
| FBAPD63911   | <i>Bombus</i> | <i>Bombus cryptarum</i> |                          |
| GBAH030106   | <i>Bombus</i> | <i>Bombus cryptarum</i> |                          |
| GBAH030206   | <i>Bombus</i> | <i>Bombus cryptarum</i> |                          |
| GBAH030306   | <i>Bombus</i> | <i>Bombus cryptarum</i> |                          |
| GBAH030406   | <i>Bombus</i> | <i>Bombus cryptarum</i> |                          |
| GBAH030506   | <i>Bombus</i> | <i>Bombus cryptarum</i> | <i>Bombus florilegus</i> |
| GBAH030606   | <i>Bombus</i> | <i>Bombus cryptarum</i> | <i>Bombus florilegus</i> |
| GBAH066406   | <i>Bombus</i> | <i>Bombus cryptarum</i> |                          |
| GBAH066506   | <i>Bombus</i> | <i>Bombus cryptarum</i> |                          |
| GBAH1090315  | <i>Bombus</i> | <i>Bombus cryptarum</i> |                          |
| GBAH1090415  | <i>Bombus</i> | <i>Bombus cryptarum</i> |                          |
| GBAH1090515  | <i>Bombus</i> | <i>Bombus cryptarum</i> |                          |
| GBAH1090615  | <i>Bombus</i> | <i>Bombus cryptarum</i> |                          |
| GBAH1090715  | <i>Bombus</i> | <i>Bombus cryptarum</i> |                          |
| GBAH138306   | <i>Bombus</i> | <i>Bombus cryptarum</i> |                          |
| GBAH138406   | <i>Bombus</i> | <i>Bombus cryptarum</i> |                          |
| GBAH138506   | <i>Bombus</i> | <i>Bombus cryptarum</i> |                          |
| GBAH1655319  | <i>Bombus</i> | <i>Bombus cryptarum</i> |                          |
| GBAH1655919  | <i>Bombus</i> | <i>Bombus cryptarum</i> |                          |
| GBAH387508   | <i>Bombus</i> | <i>Bombus cryptarum</i> |                          |
| GBHAP138815  | <i>Bombus</i> | <i>Bombus cryptarum</i> |                          |
| GBHAP138915  | <i>Bombus</i> | <i>Bombus cryptarum</i> |                          |
| GBHAP139015  | <i>Bombus</i> | <i>Bombus cryptarum</i> |                          |
| GBHAP29914   | <i>Bombus</i> | <i>Bombus cryptarum</i> |                          |
| GBMIN7194817 | <i>Bombus</i> | <i>Bombus cryptarum</i> |                          |
| GBMNA1896819 | <i>Bombus</i> | <i>Bombus cryptarum</i> | <i>Bombus florilegus</i> |
| GBMNA3187519 | <i>Bombus</i> | <i>Bombus cryptarum</i> | <i>Bombus florilegus</i> |
| GBMNA3187619 | <i>Bombus</i> | <i>Bombus cryptarum</i> | <i>Bombus florilegus</i> |
| GBMNA3187719 | <i>Bombus</i> | <i>Bombus cryptarum</i> | <i>Bombus florilegus</i> |
| GBMNA3238619 | <i>Bombus</i> | <i>Bombus cryptarum</i> |                          |
| GBMNA3238719 | <i>Bombus</i> | <i>Bombus cryptarum</i> |                          |
| GBMNA3238819 | <i>Bombus</i> | <i>Bombus cryptarum</i> |                          |
| JCLUC00111   | <i>Bombus</i> | <i>Bombus cryptarum</i> |                          |
| JCLUC00211   | <i>Bombus</i> | <i>Bombus cryptarum</i> |                          |
| JCLUC00311   | <i>Bombus</i> | <i>Bombus cryptarum</i> |                          |
| JCLUC00411   | <i>Bombus</i> | <i>Bombus cryptarum</i> |                          |
| JCLUC00511   | <i>Bombus</i> | <i>Bombus cryptarum</i> |                          |
| JCLUC00611   | <i>Bombus</i> | <i>Bombus cryptarum</i> |                          |
| JCLUC00711   | <i>Bombus</i> | <i>Bombus cryptarum</i> |                          |
| JCLUC00811   | <i>Bombus</i> | <i>Bombus cryptarum</i> |                          |
| JCLUC00911   | <i>Bombus</i> | <i>Bombus cryptarum</i> |                          |
| JCLUC01011   | <i>Bombus</i> | <i>Bombus cryptarum</i> |                          |
| JCLUC01111   | <i>Bombus</i> | <i>Bombus cryptarum</i> |                          |
| JCLUC01211   | <i>Bombus</i> | <i>Bombus cryptarum</i> |                          |
| JCLUC01311   | <i>Bombus</i> | <i>Bombus cryptarum</i> |                          |
| JCLUC01411   | <i>Bombus</i> | <i>Bombus cryptarum</i> |                          |

|             |               |                          |                         |
|-------------|---------------|--------------------------|-------------------------|
| JCLUC01511  | <i>Bombus</i> | <i>Bombus cryptarum</i>  |                         |
| JCLUC01611  | <i>Bombus</i> | <i>Bombus cryptarum</i>  |                         |
| JCLUC01711  | <i>Bombus</i> | <i>Bombus cryptarum</i>  |                         |
| JCLUC01811  | <i>Bombus</i> | <i>Bombus cryptarum</i>  |                         |
| JCLUC01911  | <i>Bombus</i> | <i>Bombus cryptarum</i>  |                         |
| JCLUC02011  | <i>Bombus</i> | <i>Bombus cryptarum</i>  |                         |
| JCLUC02111  | <i>Bombus</i> | <i>Bombus cryptarum</i>  |                         |
| JCLUC02211  | <i>Bombus</i> | <i>Bombus cryptarum</i>  |                         |
| LEFIJ612117 | <i>Bombus</i> | <i>Bombus cryptarum</i>  |                         |
| TTHYW33608  | <i>Bombus</i> | <i>Bombus cryptarum</i>  | <i>Bombus moderatus</i> |
| TTHYW33808  | <i>Bombus</i> | <i>Bombus cryptarum</i>  |                         |
| TTHYW38408  | <i>Bombus</i> | <i>Bombus cryptarum</i>  | <i>Bombus moderatus</i> |
| TTHYW38508  | <i>Bombus</i> | <i>Bombus cryptarum</i>  | <i>Bombus moderatus</i> |
| UAMIC75313  | <i>Bombus</i> | <i>Bombus cryptarum</i>  | <i>Bombus moderatus</i> |
| UAMIC75413  | <i>Bombus</i> | <i>Bombus cryptarum</i>  | <i>Bombus moderatus</i> |
| BBBO44511   | <i>Bombus</i> | <i>Bombus cullumanus</i> |                         |
| BBWP24109   | <i>Bombus</i> | <i>Bombus cullumanus</i> |                         |
| BBWP24209   | <i>Bombus</i> | <i>Bombus cullumanus</i> |                         |
| BBWP24309   | <i>Bombus</i> | <i>Bombus cullumanus</i> |                         |
| BBWP24409   | <i>Bombus</i> | <i>Bombus cullumanus</i> |                         |
| BBWP24509   | <i>Bombus</i> | <i>Bombus cullumanus</i> |                         |
| BBWP24609   | <i>Bombus</i> | <i>Bombus cullumanus</i> |                         |
| BBWP25909   | <i>Bombus</i> | <i>Bombus cullumanus</i> |                         |
| BBWP26109   | <i>Bombus</i> | <i>Bombus cullumanus</i> |                         |
| BBWP26609   | <i>Bombus</i> | <i>Bombus cullumanus</i> |                         |
| BBWP26809   | <i>Bombus</i> | <i>Bombus cullumanus</i> |                         |
| BBWP26909   | <i>Bombus</i> | <i>Bombus cullumanus</i> |                         |
| BBWP27009   | <i>Bombus</i> | <i>Bombus cullumanus</i> |                         |
| BBWP42310   | <i>Bombus</i> | <i>Bombus cullumanus</i> |                         |
| BBWP42410   | <i>Bombus</i> | <i>Bombus cullumanus</i> |                         |
| BBWP42510   | <i>Bombus</i> | <i>Bombus cullumanus</i> |                         |
| BBWP42610   | <i>Bombus</i> | <i>Bombus cullumanus</i> |                         |
| BBWP42710   | <i>Bombus</i> | <i>Bombus cullumanus</i> |                         |
| BBWP42810   | <i>Bombus</i> | <i>Bombus cullumanus</i> |                         |
| BBWP46610   | <i>Bombus</i> | <i>Bombus cullumanus</i> |                         |
| BBWP46710   | <i>Bombus</i> | <i>Bombus cullumanus</i> |                         |
| BBWP49010   | <i>Bombus</i> | <i>Bombus cullumanus</i> |                         |
| BBWP49110   | <i>Bombus</i> | <i>Bombus cullumanus</i> |                         |
| BBWP49210   | <i>Bombus</i> | <i>Bombus cullumanus</i> |                         |
| BBWP49310   | <i>Bombus</i> | <i>Bombus cullumanus</i> |                         |
| BBWP57112   | <i>Bombus</i> | <i>Bombus cullumanus</i> |                         |
| BBWP61512   | <i>Bombus</i> | <i>Bombus cullumanus</i> |                         |
| BBWP61612   | <i>Bombus</i> | <i>Bombus cullumanus</i> |                         |
| BBWP61712   | <i>Bombus</i> | <i>Bombus cullumanus</i> |                         |
| BBWP61812   | <i>Bombus</i> | <i>Bombus cullumanus</i> |                         |
| BBWP61912   | <i>Bombus</i> | <i>Bombus cullumanus</i> |                         |

|              |               |                             |                           |
|--------------|---------------|-----------------------------|---------------------------|
| BBWP62012    | <i>Bombus</i> | <i>Bombus cullumanus</i>    |                           |
| BBWP62212    | <i>Bombus</i> | <i>Bombus cullumanus</i>    |                           |
| PCHEL02709   | <i>Bombus</i> | <i>Bombus cullumanus</i>    | <i>Bombus serrisquama</i> |
| GBAH1090815  | <i>Bombus</i> | <i>Bombus czerskii</i>      |                           |
| GBAH1090915  | <i>Bombus</i> | <i>Bombus czerskii</i>      |                           |
| GBAH040106   | <i>Bombus</i> | <i>Bombus defector</i>      |                           |
| GBAH036806   | <i>Bombus</i> | <i>Bombus deuteronymus</i>  |                           |
| GBAH036906   | <i>Bombus</i> | <i>Bombus deuteronymus</i>  |                           |
| GBAH037006   | <i>Bombus</i> | <i>Bombus deuteronymus</i>  |                           |
| GBAH037106   | <i>Bombus</i> | <i>Bombus deuteronymus</i>  |                           |
| GBAH037206   | <i>Bombus</i> | <i>Bombus deuteronymus</i>  |                           |
| GBAH037306   | <i>Bombus</i> | <i>Bombus deuteronymus</i>  |                           |
| GBAH041406   | <i>Bombus</i> | <i>Bombus deuteronymus</i>  |                           |
| BBBO31710    | <i>Bombus</i> | <i>Bombus difficillimus</i> |                           |
| BBBO31810    | <i>Bombus</i> | <i>Bombus difficillimus</i> |                           |
| BBBO31910    | <i>Bombus</i> | <i>Bombus difficillimus</i> |                           |
| BBBO32010    | <i>Bombus</i> | <i>Bombus difficillimus</i> |                           |
| BBWP00909    | <i>Bombus</i> | <i>Bombus difficillimus</i> |                           |
| BBWP01009    | <i>Bombus</i> | <i>Bombus difficillimus</i> |                           |
| BBWP01109    | <i>Bombus</i> | <i>Bombus difficillimus</i> |                           |
| BBWP03009    | <i>Bombus</i> | <i>Bombus difficillimus</i> |                           |
| GBMIN7194917 | <i>Bombus</i> | <i>Bombus difficillimus</i> |                           |
| ASINH01812   | <i>Bombus</i> | <i>Bombus digressus</i>     |                           |
| GBHAP75414   | <i>Bombus</i> | <i>Bombus diligens</i>      |                           |
| BBWP04309    | <i>Bombus</i> | <i>Bombus distinguendus</i> |                           |
| BBWP04409    | <i>Bombus</i> | <i>Bombus distinguendus</i> |                           |
| BBWP04509    | <i>Bombus</i> | <i>Bombus distinguendus</i> |                           |
| BBWP04609    | <i>Bombus</i> | <i>Bombus distinguendus</i> |                           |
| BBWP04909    | <i>Bombus</i> | <i>Bombus distinguendus</i> |                           |
| BBWP05209    | <i>Bombus</i> | <i>Bombus distinguendus</i> |                           |
| BBWP05309    | <i>Bombus</i> | <i>Bombus distinguendus</i> |                           |
| BBWP05609    | <i>Bombus</i> | <i>Bombus distinguendus</i> |                           |
| BBWP10709    | <i>Bombus</i> | <i>Bombus distinguendus</i> |                           |
| BBWP10809    | <i>Bombus</i> | <i>Bombus distinguendus</i> |                           |
| BBWP10909    | <i>Bombus</i> | <i>Bombus distinguendus</i> |                           |
| BBWP11009    | <i>Bombus</i> | <i>Bombus distinguendus</i> |                           |
| BBWP11109    | <i>Bombus</i> | <i>Bombus distinguendus</i> |                           |
| BBWP11209    | <i>Bombus</i> | <i>Bombus distinguendus</i> |                           |
| BBWP11309    | <i>Bombus</i> | <i>Bombus distinguendus</i> |                           |
| BBWP11409    | <i>Bombus</i> | <i>Bombus distinguendus</i> |                           |
| BBWP11509    | <i>Bombus</i> | <i>Bombus distinguendus</i> |                           |
| BBWP11609    | <i>Bombus</i> | <i>Bombus distinguendus</i> |                           |
| BBWP11709    | <i>Bombus</i> | <i>Bombus distinguendus</i> |                           |
| BBWP23709    | <i>Bombus</i> | <i>Bombus distinguendus</i> |                           |
| BBWP23809    | <i>Bombus</i> | <i>Bombus distinguendus</i> |                           |
| BBWP31509    | <i>Bombus</i> | <i>Bombus distinguendus</i> |                           |



|              |               |                             |                         |
|--------------|---------------|-----------------------------|-------------------------|
| BBWP31609    | <i>Bombus</i> | <i>Bombus distinguendus</i> |                         |
| BBWP35009    | <i>Bombus</i> | <i>Bombus distinguendus</i> |                         |
| BBWP38510    | <i>Bombus</i> | <i>Bombus distinguendus</i> |                         |
| BBWP38910    | <i>Bombus</i> | <i>Bombus distinguendus</i> |                         |
| FBAPB99209   | <i>Bombus</i> | <i>Bombus distinguendus</i> |                         |
| FBAPB99309   | <i>Bombus</i> | <i>Bombus distinguendus</i> |                         |
| GBCHA57613   | <i>Bombus</i> | <i>Bombus distinguendus</i> |                         |
| BBWP53310    | <i>Bombus</i> | <i>Bombus diversus</i>      |                         |
| GBAH032006   | <i>Bombus</i> | <i>Bombus diversus</i>      |                         |
| GBAH032106   | <i>Bombus</i> | <i>Bombus diversus</i>      |                         |
| GBAH032206   | <i>Bombus</i> | <i>Bombus diversus</i>      |                         |
| GBAH032306   | <i>Bombus</i> | <i>Bombus diversus</i>      |                         |
| GBAH039906   | <i>Bombus</i> | <i>Bombus diversus</i>      |                         |
| GBAH1676319  | <i>Bombus</i> | <i>Bombus diversus</i>      |                         |
| GBAH709810   | <i>Bombus</i> | <i>Bombus diversus</i>      |                         |
| GBMIN7195017 | <i>Bombus</i> | <i>Bombus diversus</i>      |                         |
| ASINH02112   | <i>Bombus</i> | <i>Bombus ehippiatus</i>    |                         |
| GBMNB6114320 | <i>Bombus</i> | <i>Bombus ehippiatus</i>    | <i>Bombus wilmattae</i> |
| GBMNB6115020 | <i>Bombus</i> | <i>Bombus ehippiatus</i>    | <i>Bombus wilmattae</i> |
| GBMNB6115120 | <i>Bombus</i> | <i>Bombus ehippiatus</i>    | <i>Bombus wilmattae</i> |
| GBMNB6116120 | <i>Bombus</i> | <i>Bombus ehippiatus</i>    | <i>Bombus wilmattae</i> |
| GBMNB6121020 | <i>Bombus</i> | <i>Bombus ehippiatus</i>    |                         |
| GBMNB6121120 | <i>Bombus</i> | <i>Bombus ehippiatus</i>    |                         |
| GBMNB6121220 | <i>Bombus</i> | <i>Bombus ehippiatus</i>    |                         |
| GBMNB6122520 | <i>Bombus</i> | <i>Bombus ehippiatus</i>    |                         |
| GBMNB6122620 | <i>Bombus</i> | <i>Bombus ehippiatus</i>    |                         |
| GBMNB6225720 | <i>Bombus</i> | <i>Bombus ehippiatus</i>    |                         |
| GBMNB6298320 | <i>Bombus</i> | <i>Bombus ehippiatus</i>    |                         |
| GBMNB6298420 | <i>Bombus</i> | <i>Bombus ehippiatus</i>    |                         |
| GBMNB6298520 | <i>Bombus</i> | <i>Bombus ehippiatus</i>    |                         |
| GBMNB6298620 | <i>Bombus</i> | <i>Bombus ehippiatus</i>    |                         |
| GBMNB6298720 | <i>Bombus</i> | <i>Bombus ehippiatus</i>    |                         |
| GBMNB6298820 | <i>Bombus</i> | <i>Bombus ehippiatus</i>    |                         |
| GBMNB6309920 | <i>Bombus</i> | <i>Bombus ehippiatus</i>    | <i>Bombus wilmattae</i> |
| GBMNB6310020 | <i>Bombus</i> | <i>Bombus ehippiatus</i>    | <i>Bombus wilmattae</i> |
| GBMNB6310120 | <i>Bombus</i> | <i>Bombus ehippiatus</i>    | <i>Bombus wilmattae</i> |
| RRMFD55915   | <i>Bombus</i> | <i>Bombus ehippiatus</i>    |                         |
| GBHAP81614   | <i>Bombus</i> | <i>Bombus excellens</i>     |                         |
| BOFTH18208   | <i>Bombus</i> | <i>Bombus eximius</i>       |                         |
| GBAH1819719  | <i>Bombus</i> | <i>Bombus eximius</i>       |                         |
| GBAH1819819  | <i>Bombus</i> | <i>Bombus eximius</i>       |                         |
| BBWP02209    | <i>Bombus</i> | <i>Bombus fedtschenkoi</i>  |                         |
| BBHYA08112   | <i>Bombus</i> | <i>Bombus fervidus</i>      |                         |
| BBHYA55712   | <i>Bombus</i> | <i>Bombus fervidus</i>      |                         |
| BEECB62407   | <i>Bombus</i> | <i>Bombus fervidus</i>      |                         |
| BEECC25008   | <i>Bombus</i> | <i>Bombus fervidus</i>      |                         |



|              |               |                          |                         |
|--------------|---------------|--------------------------|-------------------------|
| GBAH1830019  | <i>Bombus</i> | <i>Bombus fervidus</i>   |                         |
| GBAH1830119  | <i>Bombus</i> | <i>Bombus fervidus</i>   |                         |
| GBAH1830219  | <i>Bombus</i> | <i>Bombus fervidus</i>   |                         |
| GBAH1830319  | <i>Bombus</i> | <i>Bombus fervidus</i>   |                         |
| GBAH1830419  | <i>Bombus</i> | <i>Bombus fervidus</i>   |                         |
| GBAH1830519  | <i>Bombus</i> | <i>Bombus fervidus</i>   |                         |
| GBAH1830619  | <i>Bombus</i> | <i>Bombus fervidus</i>   |                         |
| GBAH1830719  | <i>Bombus</i> | <i>Bombus fervidus</i>   |                         |
| GBAH1830819  | <i>Bombus</i> | <i>Bombus fervidus</i>   |                         |
| GBAH1830919  | <i>Bombus</i> | <i>Bombus fervidus</i>   |                         |
| GBAH1831019  | <i>Bombus</i> | <i>Bombus fervidus</i>   |                         |
| GBAH1831119  | <i>Bombus</i> | <i>Bombus fervidus</i>   |                         |
| GBAH1831219  | <i>Bombus</i> | <i>Bombus fervidus</i>   |                         |
| GBAH1831319  | <i>Bombus</i> | <i>Bombus fervidus</i>   |                         |
| GBAH1831419  | <i>Bombus</i> | <i>Bombus fervidus</i>   |                         |
| GBAH1831519  | <i>Bombus</i> | <i>Bombus fervidus</i>   |                         |
| GBAH1831619  | <i>Bombus</i> | <i>Bombus fervidus</i>   |                         |
| GBAH1831719  | <i>Bombus</i> | <i>Bombus fervidus</i>   |                         |
| HCBNS11403   | <i>Bombus</i> | <i>Bombus fervidus</i>   |                         |
| HCBNS11503   | <i>Bombus</i> | <i>Bombus fervidus</i>   |                         |
| HCBNS11603   | <i>Bombus</i> | <i>Bombus fervidus</i>   |                         |
| HCBNS19103   | <i>Bombus</i> | <i>Bombus fervidus</i>   |                         |
| HCBNS19203   | <i>Bombus</i> | <i>Bombus fervidus</i>   |                         |
| HCBNS19303   | <i>Bombus</i> | <i>Bombus fervidus</i>   |                         |
| HYMBB00809   | <i>Bombus</i> | <i>Bombus fervidus</i>   |                         |
| NGAAC210514  | <i>Bombus</i> | <i>Bombus fervidus</i>   |                         |
| NGAAD189114  | <i>Bombus</i> | <i>Bombus fervidus</i>   |                         |
| NGAAD189814  | <i>Bombus</i> | <i>Bombus fervidus</i>   |                         |
| NGNAN404214  | <i>Bombus</i> | <i>Bombus fervidus</i>   |                         |
| NGNAS140414  | <i>Bombus</i> | <i>Bombus fervidus</i>   |                         |
| SSBAD00512   | <i>Bombus</i> | <i>Bombus fervidus</i>   |                         |
| SSWLB147513  | <i>Bombus</i> | <i>Bombus fervidus</i>   |                         |
| SSWLE555313  | <i>Bombus</i> | <i>Bombus fervidus</i>   |                         |
| SSWLE767013  | <i>Bombus</i> | <i>Bombus fervidus</i>   |                         |
| TTHYW38808   | <i>Bombus</i> | <i>Bombus fervidus</i>   |                         |
| UPOLL84809   | <i>Bombus</i> | <i>Bombus fervidus</i>   |                         |
| GBMIN7195117 | <i>Bombus</i> | <i>Bombus filchnerae</i> |                         |
| BOFTH43409   | <i>Bombus</i> | <i>Bombus flavescens</i> |                         |
| BOFTW09108   | <i>Bombus</i> | <i>Bombus flavescens</i> |                         |
| GBMIN7195217 | <i>Bombus</i> | <i>Bombus flavescens</i> |                         |
| BBHYL23910   | <i>Bombus</i> | <i>Bombus flavidus</i>   | <i>Bombus fernaldae</i> |
| BBHYL26610   | <i>Bombus</i> | <i>Bombus flavidus</i>   | <i>Bombus fernaldae</i> |
| BEECA33706   | <i>Bombus</i> | <i>Bombus flavidus</i>   | <i>Bombus fernaldae</i> |
| BEECA34006   | <i>Bombus</i> | <i>Bombus flavidus</i>   | <i>Bombus fernaldae</i> |
| BEECA34106   | <i>Bombus</i> | <i>Bombus flavidus</i>   | <i>Bombus fernaldae</i> |
| BEECB61807   | <i>Bombus</i> | <i>Bombus flavidus</i>   |                         |

|              |               |                          |                         |
|--------------|---------------|--------------------------|-------------------------|
| CNEIA223712  | <i>Bombus</i> | <i>Bombus flavidus</i>   | <i>Bombus fernaldae</i> |
| CNGLC07013   | <i>Bombus</i> | <i>Bombus flavidus</i>   | <i>Bombus fernaldae</i> |
| CNKLB52514   | <i>Bombus</i> | <i>Bombus flavidus</i>   | <i>Bombus fernaldae</i> |
| CNWLE236812  | <i>Bombus</i> | <i>Bombus flavidus</i>   | <i>Bombus fernaldae</i> |
| GBAH074806   | <i>Bombus</i> | <i>Bombus flavidus</i>   |                         |
| GMNCD04912   | <i>Bombus</i> | <i>Bombus flavidus</i>   | <i>Bombus fernaldae</i> |
| HCBNS11703   | <i>Bombus</i> | <i>Bombus flavidus</i>   | <i>Bombus fernaldae</i> |
| HCBNS11803   | <i>Bombus</i> | <i>Bombus flavidus</i>   | <i>Bombus fernaldae</i> |
| HCBNS11903   | <i>Bombus</i> | <i>Bombus flavidus</i>   | <i>Bombus fernaldae</i> |
| HMBCH03807   | <i>Bombus</i> | <i>Bombus flavidus</i>   | <i>Bombus fernaldae</i> |
| HPPPC10413   | <i>Bombus</i> | <i>Bombus flavidus</i>   | <i>Bombus fernaldae</i> |
| HPPPH93513   | <i>Bombus</i> | <i>Bombus flavidus</i>   | <i>Bombus fernaldae</i> |
| MHBEE05707   | <i>Bombus</i> | <i>Bombus flavidus</i>   | <i>Bombus fernaldae</i> |
| MHBEE06707   | <i>Bombus</i> | <i>Bombus flavidus</i>   | <i>Bombus fernaldae</i> |
| MHBEE08107   | <i>Bombus</i> | <i>Bombus flavidus</i>   | <i>Bombus fernaldae</i> |
| SSGBC1004114 | <i>Bombus</i> | <i>Bombus flavidus</i>   | <i>Bombus fernaldae</i> |
| SSKOA16315   | <i>Bombus</i> | <i>Bombus flavidus</i>   | <i>Bombus fernaldae</i> |
| SSPAB468913  | <i>Bombus</i> | <i>Bombus flavidus</i>   | <i>Bombus fernaldae</i> |
| SSWLE766513  | <i>Bombus</i> | <i>Bombus flavidus</i>   | <i>Bombus fernaldae</i> |
| SSWLF03213   | <i>Bombus</i> | <i>Bombus flavidus</i>   | <i>Bombus fernaldae</i> |
| TTHYW33908   | <i>Bombus</i> | <i>Bombus flavidus</i>   | <i>Bombus fernaldae</i> |
| TTHYW65308   | <i>Bombus</i> | <i>Bombus flavidus</i>   | <i>Bombus fernaldae</i> |
| TTHYW67408   | <i>Bombus</i> | <i>Bombus flavidus</i>   | <i>Bombus fernaldae</i> |
| UAMIC75513   | <i>Bombus</i> | <i>Bombus flavidus</i>   | <i>Bombus fernaldae</i> |
| UAMIC75613   | <i>Bombus</i> | <i>Bombus flavidus</i>   | <i>Bombus fernaldae</i> |
| BBHYB02012   | <i>Bombus</i> | <i>Bombus flavifrons</i> |                         |
| BBHYL26210   | <i>Bombus</i> | <i>Bombus flavifrons</i> |                         |
| BBHYL26510   | <i>Bombus</i> | <i>Bombus flavifrons</i> |                         |
| BBHYL27210   | <i>Bombus</i> | <i>Bombus flavifrons</i> |                         |
| BBHYL27310   | <i>Bombus</i> | <i>Bombus flavifrons</i> |                         |
| BBHYL27410   | <i>Bombus</i> | <i>Bombus flavifrons</i> |                         |
| BEECA03806   | <i>Bombus</i> | <i>Bombus flavifrons</i> |                         |
| BEECA03906   | <i>Bombus</i> | <i>Bombus flavifrons</i> |                         |
| BEECA04006   | <i>Bombus</i> | <i>Bombus flavifrons</i> |                         |
| BEECA32106   | <i>Bombus</i> | <i>Bombus flavifrons</i> |                         |
| BEECA32206   | <i>Bombus</i> | <i>Bombus flavifrons</i> |                         |
| BEECA32506   | <i>Bombus</i> | <i>Bombus flavifrons</i> |                         |
| BEECA32706   | <i>Bombus</i> | <i>Bombus flavifrons</i> |                         |
| CNBF04215    | <i>Bombus</i> | <i>Bombus flavifrons</i> |                         |
| CNJAD202412  | <i>Bombus</i> | <i>Bombus flavifrons</i> |                         |
| CNRME76412   | <i>Bombus</i> | <i>Bombus flavifrons</i> |                         |
| CNWBE74513   | <i>Bombus</i> | <i>Bombus flavifrons</i> |                         |
| CNWBG243013  | <i>Bombus</i> | <i>Bombus flavifrons</i> |                         |
| CNWBG243113  | <i>Bombus</i> | <i>Bombus flavifrons</i> |                         |
| CNWBG243913  | <i>Bombus</i> | <i>Bombus flavifrons</i> |                         |
| CNWBG298013  | <i>Bombus</i> | <i>Bombus flavifrons</i> |                         |

|             |               |                          |
|-------------|---------------|--------------------------|
| CNWBG299013 | <i>Bombus</i> | <i>Bombus flavifrons</i> |
| CNWBG301813 | <i>Bombus</i> | <i>Bombus flavifrons</i> |
| CNWBG302213 | <i>Bombus</i> | <i>Bombus flavifrons</i> |
| CNWBH136213 | <i>Bombus</i> | <i>Bombus flavifrons</i> |
| CNYOC198815 | <i>Bombus</i> | <i>Bombus flavifrons</i> |
| HMBCH00107  | <i>Bombus</i> | <i>Bombus flavifrons</i> |
| JSYKA17010  | <i>Bombus</i> | <i>Bombus flavifrons</i> |
| JSYKA17110  | <i>Bombus</i> | <i>Bombus flavifrons</i> |
| JSYKA17310  | <i>Bombus</i> | <i>Bombus flavifrons</i> |
| JSYKA17410  | <i>Bombus</i> | <i>Bombus flavifrons</i> |
| JSYKA17510  | <i>Bombus</i> | <i>Bombus flavifrons</i> |
| JSYKA17710  | <i>Bombus</i> | <i>Bombus flavifrons</i> |
| JSYKA17810  | <i>Bombus</i> | <i>Bombus flavifrons</i> |
| MHBEE08207  | <i>Bombus</i> | <i>Bombus flavifrons</i> |
| SSBAD615613 | <i>Bombus</i> | <i>Bombus flavifrons</i> |
| SSBAD616713 | <i>Bombus</i> | <i>Bombus flavifrons</i> |
| SSBAD617413 | <i>Bombus</i> | <i>Bombus flavifrons</i> |
| SSBAD617513 | <i>Bombus</i> | <i>Bombus flavifrons</i> |
| SSBAD620113 | <i>Bombus</i> | <i>Bombus flavifrons</i> |
| SSBAD620513 | <i>Bombus</i> | <i>Bombus flavifrons</i> |
| SSBAF787113 | <i>Bombus</i> | <i>Bombus flavifrons</i> |
| SSJAA81413  | <i>Bombus</i> | <i>Bombus flavifrons</i> |
| SSJAD159213 | <i>Bombus</i> | <i>Bombus flavifrons</i> |
| SSJAF281613 | <i>Bombus</i> | <i>Bombus flavifrons</i> |
| SSKUB26515  | <i>Bombus</i> | <i>Bombus flavifrons</i> |
| SSWLA387313 | <i>Bombus</i> | <i>Bombus flavifrons</i> |
| SSWLD374113 | <i>Bombus</i> | <i>Bombus flavifrons</i> |
| TTHYW20708  | <i>Bombus</i> | <i>Bombus flavifrons</i> |
| TTHYW23408  | <i>Bombus</i> | <i>Bombus flavifrons</i> |
| TTHYW31308  | <i>Bombus</i> | <i>Bombus flavifrons</i> |
| TTHYW48808  | <i>Bombus</i> | <i>Bombus flavifrons</i> |
| UAMIC69013  | <i>Bombus</i> | <i>Bombus flavifrons</i> |
| UAMIC73613  | <i>Bombus</i> | <i>Bombus flavifrons</i> |
| UAMIC73713  | <i>Bombus</i> | <i>Bombus flavifrons</i> |
| UAMIC74513  | <i>Bombus</i> | <i>Bombus flavifrons</i> |
| UAMIC74613  | <i>Bombus</i> | <i>Bombus flavifrons</i> |
| BBWP03109   | <i>Bombus</i> | <i>Bombus fragrans</i>   |
| BBWP03209   | <i>Bombus</i> | <i>Bombus fragrans</i>   |
| BBWP03309   | <i>Bombus</i> | <i>Bombus fragrans</i>   |
| BBWP03409   | <i>Bombus</i> | <i>Bombus fragrans</i>   |
| BBWP03609   | <i>Bombus</i> | <i>Bombus fragrans</i>   |
| BBWP03709   | <i>Bombus</i> | <i>Bombus fragrans</i>   |
| BBWP17109   | <i>Bombus</i> | <i>Bombus fragrans</i>   |
| BBWP17209   | <i>Bombus</i> | <i>Bombus fragrans</i>   |
| GBAH387408  | <i>Bombus</i> | <i>Bombus franklini</i>  |
| BBHYA07312  | <i>Bombus</i> | <i>Bombus fraternus</i>  |

|              |               |                         |
|--------------|---------------|-------------------------|
| GBMIN7195317 | <i>Bombus</i> | <i>Bombus fraternus</i> |
| BBHYL22110   | <i>Bombus</i> | <i>Bombus frigidus</i>  |
| BEECA29306   | <i>Bombus</i> | <i>Bombus frigidus</i>  |
| BEECA29406   | <i>Bombus</i> | <i>Bombus frigidus</i>  |
| BEECA34806   | <i>Bombus</i> | <i>Bombus frigidus</i>  |
| BEECA34906   | <i>Bombus</i> | <i>Bombus frigidus</i>  |
| CHUBE00306   | <i>Bombus</i> | <i>Bombus frigidus</i>  |
| CHUBE01006   | <i>Bombus</i> | <i>Bombus frigidus</i>  |
| CHUBE02306   | <i>Bombus</i> | <i>Bombus frigidus</i>  |
| CNKLB350414  | <i>Bombus</i> | <i>Bombus frigidus</i>  |
| CNKLB350514  | <i>Bombus</i> | <i>Bombus frigidus</i>  |
| CNKLB52614   | <i>Bombus</i> | <i>Bombus frigidus</i>  |
| CNKLB52714   | <i>Bombus</i> | <i>Bombus frigidus</i>  |
| CNKLB52814   | <i>Bombus</i> | <i>Bombus frigidus</i>  |
| CNKLB52914   | <i>Bombus</i> | <i>Bombus frigidus</i>  |
| CNKLB53014   | <i>Bombus</i> | <i>Bombus frigidus</i>  |
| CNKLC02114   | <i>Bombus</i> | <i>Bombus frigidus</i>  |
| CNKLC02314   | <i>Bombus</i> | <i>Bombus frigidus</i>  |
| CNKLC02414   | <i>Bombus</i> | <i>Bombus frigidus</i>  |
| CNKLC248114  | <i>Bombus</i> | <i>Bombus frigidus</i>  |
| CNKLC248314  | <i>Bombus</i> | <i>Bombus frigidus</i>  |
| CNKLE00115   | <i>Bombus</i> | <i>Bombus frigidus</i>  |
| CNKLG139315  | <i>Bombus</i> | <i>Bombus frigidus</i>  |
| CNNHA15114   | <i>Bombus</i> | <i>Bombus frigidus</i>  |
| CNNHB33414   | <i>Bombus</i> | <i>Bombus frigidus</i>  |
| CNTGC02515   | <i>Bombus</i> | <i>Bombus frigidus</i>  |
| CNTMB368014  | <i>Bombus</i> | <i>Bombus frigidus</i>  |
| CNWBA15913   | <i>Bombus</i> | <i>Bombus frigidus</i>  |
| CNWLB55112   | <i>Bombus</i> | <i>Bombus frigidus</i>  |
| CNWLB55312   | <i>Bombus</i> | <i>Bombus frigidus</i>  |
| CNWLE236912  | <i>Bombus</i> | <i>Bombus frigidus</i>  |
| CNWLF197312  | <i>Bombus</i> | <i>Bombus frigidus</i>  |
| CNWLL38213   | <i>Bombus</i> | <i>Bombus frigidus</i>  |
| CNWLN102813  | <i>Bombus</i> | <i>Bombus frigidus</i>  |
| GMOQF26115   | <i>Bombus</i> | <i>Bombus frigidus</i>  |
| GMOTE04015   | <i>Bombus</i> | <i>Bombus frigidus</i>  |
| GMOTE04515   | <i>Bombus</i> | <i>Bombus frigidus</i>  |
| GMOTE04915   | <i>Bombus</i> | <i>Bombus frigidus</i>  |
| GMOVE05515   | <i>Bombus</i> | <i>Bombus frigidus</i>  |
| GMOVE05915   | <i>Bombus</i> | <i>Bombus frigidus</i>  |
| GMOXC838115  | <i>Bombus</i> | <i>Bombus frigidus</i>  |
| HMBCH03607   | <i>Bombus</i> | <i>Bombus frigidus</i>  |
| HMBCH04407   | <i>Bombus</i> | <i>Bombus frigidus</i>  |
| HMBCH04507   | <i>Bombus</i> | <i>Bombus frigidus</i>  |
| HMBCH04707   | <i>Bombus</i> | <i>Bombus frigidus</i>  |
| JSYKA16710   | <i>Bombus</i> | <i>Bombus frigidus</i>  |

|              |               |                            |
|--------------|---------------|----------------------------|
| JSYKA17210   | <i>Bombus</i> | <i>Bombus frigidus</i>     |
| MHBEE02507   | <i>Bombus</i> | <i>Bombus frigidus</i>     |
| MHBEE03307   | <i>Bombus</i> | <i>Bombus frigidus</i>     |
| MHBEE03407   | <i>Bombus</i> | <i>Bombus frigidus</i>     |
| MHBEE03607   | <i>Bombus</i> | <i>Bombus frigidus</i>     |
| MHBEE04107   | <i>Bombus</i> | <i>Bombus frigidus</i>     |
| MHBEE04207   | <i>Bombus</i> | <i>Bombus frigidus</i>     |
| MHBEE04607   | <i>Bombus</i> | <i>Bombus frigidus</i>     |
| MHBEE05907   | <i>Bombus</i> | <i>Bombus frigidus</i>     |
| MHBEE06007   | <i>Bombus</i> | <i>Bombus frigidus</i>     |
| MHBEE06507   | <i>Bombus</i> | <i>Bombus frigidus</i>     |
| MHBEE07007   | <i>Bombus</i> | <i>Bombus frigidus</i>     |
| MOBIL119716  | <i>Bombus</i> | <i>Bombus frigidus</i>     |
| MOBIL178216  | <i>Bombus</i> | <i>Bombus frigidus</i>     |
| MOBIL178316  | <i>Bombus</i> | <i>Bombus frigidus</i>     |
| SSBAD00612   | <i>Bombus</i> | <i>Bombus frigidus</i>     |
| SSBAD615113  | <i>Bombus</i> | <i>Bombus frigidus</i>     |
| SSBAD615313  | <i>Bombus</i> | <i>Bombus frigidus</i>     |
| SSBAD616413  | <i>Bombus</i> | <i>Bombus frigidus</i>     |
| SSBAD616813  | <i>Bombus</i> | <i>Bombus frigidus</i>     |
| SSBAD618013  | <i>Bombus</i> | <i>Bombus frigidus</i>     |
| SSBAD618213  | <i>Bombus</i> | <i>Bombus frigidus</i>     |
| SSBAD620013  | <i>Bombus</i> | <i>Bombus frigidus</i>     |
| SSBAD621213  | <i>Bombus</i> | <i>Bombus frigidus</i>     |
| SSBAD621613  | <i>Bombus</i> | <i>Bombus frigidus</i>     |
| SSBAD621713  | <i>Bombus</i> | <i>Bombus frigidus</i>     |
| SSBAE544613  | <i>Bombus</i> | <i>Bombus frigidus</i>     |
| SSJAB15613   | <i>Bombus</i> | <i>Bombus frigidus</i>     |
| SSJAB15713   | <i>Bombus</i> | <i>Bombus frigidus</i>     |
| SSJAF763813  | <i>Bombus</i> | <i>Bombus frigidus</i>     |
| SSKUB1255115 | <i>Bombus</i> | <i>Bombus frigidus</i>     |
| SSKUC14315   | <i>Bombus</i> | <i>Bombus frigidus</i>     |
| SSWLA387213  | <i>Bombus</i> | <i>Bombus frigidus</i>     |
| TTHYW23708   | <i>Bombus</i> | <i>Bombus frigidus</i>     |
| TTHYW31208   | <i>Bombus</i> | <i>Bombus frigidus</i>     |
| UAMIC73413   | <i>Bombus</i> | <i>Bombus frigidus</i>     |
| UAMIC73513   | <i>Bombus</i> | <i>Bombus frigidus</i>     |
| ASBEE05908   | <i>Bombus</i> | <i>Bombus friseanus</i>    |
| ASBEE06008   | <i>Bombus</i> | <i>Bombus friseanus</i>    |
| ASBEE15308   | <i>Bombus</i> | <i>Bombus friseanus</i>    |
| GBMIN7195417 | <i>Bombus</i> | <i>Bombus friseanus</i>    |
| BEECA95307   | <i>Bombus</i> | <i>Bombus funebris</i>     |
| GBAH1311819  | <i>Bombus</i> | <i>Bombus funebris</i>     |
| GBAH706810   | <i>Bombus</i> | <i>Bombus funerarius</i>   |
| BCHYM132113  | <i>Bombus</i> | <i>Bombus gerstaeckeri</i> |
| FBAPB99409   | <i>Bombus</i> | <i>Bombus gerstaeckeri</i> |

|              |               |                               |
|--------------|---------------|-------------------------------|
| FBAPB99509   | <i>Bombus</i> | <i>Bombus gerstaeckeri</i>    |
| FBHAP77909   | <i>Bombus</i> | <i>Bombus gerstaeckeri</i>    |
| GBAH1091015  | <i>Bombus</i> | <i>Bombus gerstaeckeri</i>    |
| GBMAB75515   | <i>Bombus</i> | <i>Bombus gerstaeckeri</i>    |
| GBMAB75715   | <i>Bombus</i> | <i>Bombus gerstaeckeri</i>    |
| GBMAB75915   | <i>Bombus</i> | <i>Bombus gerstaeckeri</i>    |
| GBMAB76115   | <i>Bombus</i> | <i>Bombus gerstaeckeri</i>    |
| GBMAB76315   | <i>Bombus</i> | <i>Bombus gerstaeckeri</i>    |
| GBMAB76515   | <i>Bombus</i> | <i>Bombus gerstaeckeri</i>    |
| GBMAB76715   | <i>Bombus</i> | <i>Bombus gerstaeckeri</i>    |
| GBMAB76915   | <i>Bombus</i> | <i>Bombus gerstaeckeri</i>    |
| GBMAB77015   | <i>Bombus</i> | <i>Bombus gerstaeckeri</i>    |
| GBMIN7195517 | <i>Bombus</i> | <i>Bombus gerstaeckeri</i>    |
| GBAH1698719  | <i>Bombus</i> | <i>Bombus glacialis</i>       |
| GBAH1698819  | <i>Bombus</i> | <i>Bombus glacialis</i>       |
| GBAH1698919  | <i>Bombus</i> | <i>Bombus glacialis</i>       |
| GBAH1699019  | <i>Bombus</i> | <i>Bombus glacialis</i>       |
| GBAH1699119  | <i>Bombus</i> | <i>Bombus glacialis</i>       |
| GBAH1699219  | <i>Bombus</i> | <i>Bombus glacialis</i>       |
| GBAH706110   | <i>Bombus</i> | <i>Bombus grahami</i>         |
| BEECA66507   | <i>Bombus</i> | <i>Bombus griseocollis</i>    |
| BUSA15805    | <i>Bombus</i> | <i>Bombus griseocollis</i>    |
| CNRGK52915   | <i>Bombus</i> | <i>Bombus griseocollis</i>    |
| OUIHY01009   | <i>Bombus</i> | <i>Bombus griseocollis</i>    |
| SMTPL816315  | <i>Bombus</i> | <i>Bombus griseocollis</i>    |
| GBAH1831819  | <i>Bombus</i> | <i>Bombus haematurus</i>      |
| BOFTH53210   | <i>Bombus</i> | <i>Bombus haemorrhoidalis</i> |
| GBAH1816119  | <i>Bombus</i> | <i>Bombus haemorrhoidalis</i> |
| GBAH1816219  | <i>Bombus</i> | <i>Bombus haemorrhoidalis</i> |
| GBAH1816319  | <i>Bombus</i> | <i>Bombus haemorrhoidalis</i> |
| GBAH1816519  | <i>Bombus</i> | <i>Bombus haemorrhoidalis</i> |
| GBAH1816619  | <i>Bombus</i> | <i>Bombus haemorrhoidalis</i> |
| GBAH1817019  | <i>Bombus</i> | <i>Bombus haemorrhoidalis</i> |
| GBAH1817119  | <i>Bombus</i> | <i>Bombus haemorrhoidalis</i> |
| GBAH1817219  | <i>Bombus</i> | <i>Bombus haemorrhoidalis</i> |
| GBAH1817319  | <i>Bombus</i> | <i>Bombus haemorrhoidalis</i> |
| GBAH1817519  | <i>Bombus</i> | <i>Bombus haemorrhoidalis</i> |
| GBAH1817719  | <i>Bombus</i> | <i>Bombus haemorrhoidalis</i> |
| GBAH1817819  | <i>Bombus</i> | <i>Bombus haemorrhoidalis</i> |
| GBAH1818119  | <i>Bombus</i> | <i>Bombus haemorrhoidalis</i> |
| GBAH1818219  | <i>Bombus</i> | <i>Bombus haemorrhoidalis</i> |
| GBAH1818519  | <i>Bombus</i> | <i>Bombus haemorrhoidalis</i> |
| GBAH1818619  | <i>Bombus</i> | <i>Bombus haemorrhoidalis</i> |
| GBAH1818719  | <i>Bombus</i> | <i>Bombus haemorrhoidalis</i> |
| GBAH1819219  | <i>Bombus</i> | <i>Bombus haemorrhoidalis</i> |
| GBAH1819419  | <i>Bombus</i> | <i>Bombus haemorrhoidalis</i> |



|              |               |                               |
|--------------|---------------|-------------------------------|
| GBAH1819519  | <i>Bombus</i> | <i>Bombus haemorrhoidalis</i> |
| GBAH1819619  | <i>Bombus</i> | <i>Bombus haemorrhoidalis</i> |
| GBAH706210   | <i>Bombus</i> | <i>Bombus haemorrhoidalis</i> |
| GBAH706310   | <i>Bombus</i> | <i>Bombus haemorrhoidalis</i> |
| GBAH706410   | <i>Bombus</i> | <i>Bombus haemorrhoidalis</i> |
| GBAH706510   | <i>Bombus</i> | <i>Bombus haemorrhoidalis</i> |
| GBAH706610   | <i>Bombus</i> | <i>Bombus haemorrhoidalis</i> |
| GBAH706710   | <i>Bombus</i> | <i>Bombus haemorrhoidalis</i> |
| GBMIN7195617 | <i>Bombus</i> | <i>Bombus haemorrhoidalis</i> |
| GBMIN7195717 | <i>Bombus</i> | <i>Bombus haemorrhoidalis</i> |
| GBAH037506   | <i>Bombus</i> | <i>Bombus honshuensis</i>     |
| GBAH037606   | <i>Bombus</i> | <i>Bombus honshuensis</i>     |
| GBAH037706   | <i>Bombus</i> | <i>Bombus honshuensis</i>     |
| GBAH037806   | <i>Bombus</i> | <i>Bombus honshuensis</i>     |
| BEEEE02715   | <i>Bombus</i> | <i>Bombus hortorum</i>        |
| BEEEE28916   | <i>Bombus</i> | <i>Bombus hortorum</i>        |
| BEEEE33316   | <i>Bombus</i> | <i>Bombus hortorum</i>        |
| FBHAP78109   | <i>Bombus</i> | <i>Bombus hortorum</i>        |
| FBHAP78209   | <i>Bombus</i> | <i>Bombus hortorum</i>        |
| FBHAP78309   | <i>Bombus</i> | <i>Bombus hortorum</i>        |
| GBACU212913  | <i>Bombus</i> | <i>Bombus hortorum</i>        |
| GBACU346713  | <i>Bombus</i> | <i>Bombus hortorum</i>        |
| GBACU346913  | <i>Bombus</i> | <i>Bombus hortorum</i>        |
| GBACU347013  | <i>Bombus</i> | <i>Bombus hortorum</i>        |
| GBACU347113  | <i>Bombus</i> | <i>Bombus hortorum</i>        |
| GBACU347413  | <i>Bombus</i> | <i>Bombus hortorum</i>        |
| GBAH066606   | <i>Bombus</i> | <i>Bombus hortorum</i>        |
| GBAH066706   | <i>Bombus</i> | <i>Bombus hortorum</i>        |
| GBAH066806   | <i>Bombus</i> | <i>Bombus hortorum</i>        |
| GBAH066906   | <i>Bombus</i> | <i>Bombus hortorum</i>        |
| GBAH1091115  | <i>Bombus</i> | <i>Bombus hortorum</i>        |
| GBAH1091215  | <i>Bombus</i> | <i>Bombus hortorum</i>        |
| GBAH1741119  | <i>Bombus</i> | <i>Bombus hortorum</i>        |
| GBAH1831919  | <i>Bombus</i> | <i>Bombus hortorum</i>        |
| GBAH1832019  | <i>Bombus</i> | <i>Bombus hortorum</i>        |
| GBMAB77215   | <i>Bombus</i> | <i>Bombus hortorum</i>        |
| GBMAB77415   | <i>Bombus</i> | <i>Bombus hortorum</i>        |
| GBMAB77615   | <i>Bombus</i> | <i>Bombus hortorum</i>        |
| GBMAB77815   | <i>Bombus</i> | <i>Bombus hortorum</i>        |
| GBMAB78015   | <i>Bombus</i> | <i>Bombus hortorum</i>        |
| GBMAB78215   | <i>Bombus</i> | <i>Bombus hortorum</i>        |
| GBMAB78415   | <i>Bombus</i> | <i>Bombus hortorum</i>        |
| GBMAB78515   | <i>Bombus</i> | <i>Bombus hortorum</i>        |
| GBMAB78615   | <i>Bombus</i> | <i>Bombus hortorum</i>        |
| GMGMA46914   | <i>Bombus</i> | <i>Bombus hortorum</i>        |
| GMGMA54914   | <i>Bombus</i> | <i>Bombus hortorum</i>        |

|             |               |                        |
|-------------|---------------|------------------------|
| GMGMA55814  | <i>Bombus</i> | <i>Bombus hortorum</i> |
| GMGMC13914  | <i>Bombus</i> | <i>Bombus hortorum</i> |
| GMGMC22314  | <i>Bombus</i> | <i>Bombus hortorum</i> |
| GMGMI06714  | <i>Bombus</i> | <i>Bombus hortorum</i> |
| GMGMI06814  | <i>Bombus</i> | <i>Bombus hortorum</i> |
| GMGMJ10514  | <i>Bombus</i> | <i>Bombus hortorum</i> |
| GMGMK08714  | <i>Bombus</i> | <i>Bombus hortorum</i> |
| GMGMM11314  | <i>Bombus</i> | <i>Bombus hortorum</i> |
| POLLE07518  | <i>Bombus</i> | <i>Bombus hortorum</i> |
| POLLE08618  | <i>Bombus</i> | <i>Bombus hortorum</i> |
| POLLE08718  | <i>Bombus</i> | <i>Bombus hortorum</i> |
| POLLE101919 | <i>Bombus</i> | <i>Bombus hortorum</i> |
| POLLE10718  | <i>Bombus</i> | <i>Bombus hortorum</i> |
| POLLE142219 | <i>Bombus</i> | <i>Bombus hortorum</i> |
| POLLE143519 | <i>Bombus</i> | <i>Bombus hortorum</i> |
| POLLE144219 | <i>Bombus</i> | <i>Bombus hortorum</i> |
| POLLE145019 | <i>Bombus</i> | <i>Bombus hortorum</i> |
| POLLE182319 | <i>Bombus</i> | <i>Bombus hortorum</i> |
| POLLE183919 | <i>Bombus</i> | <i>Bombus hortorum</i> |
| POLLE184119 | <i>Bombus</i> | <i>Bombus hortorum</i> |
| POLLE226719 | <i>Bombus</i> | <i>Bombus hortorum</i> |
| POLLE227019 | <i>Bombus</i> | <i>Bombus hortorum</i> |
| POLLE240219 | <i>Bombus</i> | <i>Bombus hortorum</i> |
| POLLE264819 | <i>Bombus</i> | <i>Bombus hortorum</i> |
| POLLE265419 | <i>Bombus</i> | <i>Bombus hortorum</i> |
| POLLE296119 | <i>Bombus</i> | <i>Bombus hortorum</i> |
| POLLE56019  | <i>Bombus</i> | <i>Bombus hortorum</i> |
| POLLE59519  | <i>Bombus</i> | <i>Bombus hortorum</i> |
| POLLE79919  | <i>Bombus</i> | <i>Bombus hortorum</i> |
| POLLE83419  | <i>Bombus</i> | <i>Bombus hortorum</i> |
| BEEEE17515  | <i>Bombus</i> | <i>Bombus humilis</i>  |
| BOWGF17708  | <i>Bombus</i> | <i>Bombus humilis</i>  |
| FBAPC71511  | <i>Bombus</i> | <i>Bombus humilis</i>  |
| FBAPC71611  | <i>Bombus</i> | <i>Bombus humilis</i>  |
| FBSYM28610  | <i>Bombus</i> | <i>Bombus humilis</i>  |
| GBACU119512 | <i>Bombus</i> | <i>Bombus humilis</i>  |
| GBACU119612 | <i>Bombus</i> | <i>Bombus humilis</i>  |
| GBACU213113 | <i>Bombus</i> | <i>Bombus humilis</i>  |
| GBACU213213 | <i>Bombus</i> | <i>Bombus humilis</i>  |
| GBACU213313 | <i>Bombus</i> | <i>Bombus humilis</i>  |
| GBACU213413 | <i>Bombus</i> | <i>Bombus humilis</i>  |
| GBACU97112  | <i>Bombus</i> | <i>Bombus humilis</i>  |
| GBAH037906  | <i>Bombus</i> | <i>Bombus humilis</i>  |
| GBAH067006  | <i>Bombus</i> | <i>Bombus humilis</i>  |
| GBAH1832119 | <i>Bombus</i> | <i>Bombus humilis</i>  |
| GBAH1832219 | <i>Bombus</i> | <i>Bombus humilis</i>  |

|             |               |                           |                       |
|-------------|---------------|---------------------------|-----------------------|
| IBBP05910   | <i>Bombus</i> | <i>Bombus humilis</i>     |                       |
| BBHYA08912  | <i>Bombus</i> | <i>Bombus huntii</i>      |                       |
| BBHYA09012  | <i>Bombus</i> | <i>Bombus huntii</i>      |                       |
| BBHYG57110  | <i>Bombus</i> | <i>Bombus huntii</i>      |                       |
| BBHYG57210  | <i>Bombus</i> | <i>Bombus huntii</i>      |                       |
| BBHYG57310  | <i>Bombus</i> | <i>Bombus huntii</i>      |                       |
| BBHYG57510  | <i>Bombus</i> | <i>Bombus huntii</i>      |                       |
| BEECB41607  | <i>Bombus</i> | <i>Bombus huntii</i>      |                       |
| BEECB41707  | <i>Bombus</i> | <i>Bombus huntii</i>      |                       |
| BEECC83309  | <i>Bombus</i> | <i>Bombus huntii</i>      |                       |
| CNGRF40612  | <i>Bombus</i> | <i>Bombus huntii</i>      |                       |
| CNGRF40912  | <i>Bombus</i> | <i>Bombus huntii</i>      |                       |
| HYMBB00909  | <i>Bombus</i> | <i>Bombus huntii</i>      |                       |
| HYMBB02109  | <i>Bombus</i> | <i>Bombus huntii</i>      |                       |
| NGAAA189214 | <i>Bombus</i> | <i>Bombus huntii</i>      |                       |
| NGAAC203714 | <i>Bombus</i> | <i>Bombus huntii</i>      |                       |
| NGAAC205014 | <i>Bombus</i> | <i>Bombus huntii</i>      |                       |
| NGAAC206614 | <i>Bombus</i> | <i>Bombus huntii</i>      |                       |
| NGAAC210614 | <i>Bombus</i> | <i>Bombus huntii</i>      |                       |
| NGAAD188914 | <i>Bombus</i> | <i>Bombus huntii</i>      |                       |
| NGAAD189514 | <i>Bombus</i> | <i>Bombus huntii</i>      |                       |
| NGAAD190014 | <i>Bombus</i> | <i>Bombus huntii</i>      |                       |
| NGAAD191214 | <i>Bombus</i> | <i>Bombus huntii</i>      |                       |
| NGAAD191614 | <i>Bombus</i> | <i>Bombus huntii</i>      |                       |
| NGAAD191914 | <i>Bombus</i> | <i>Bombus huntii</i>      |                       |
| NGAAD195014 | <i>Bombus</i> | <i>Bombus huntii</i>      |                       |
| NGNAK50613  | <i>Bombus</i> | <i>Bombus huntii</i>      |                       |
| NGNAK50713  | <i>Bombus</i> | <i>Bombus huntii</i>      |                       |
| NGNAK51013  | <i>Bombus</i> | <i>Bombus huntii</i>      |                       |
| NGNAL12013  | <i>Bombus</i> | <i>Bombus huntii</i>      |                       |
| NGNAP05114  | <i>Bombus</i> | <i>Bombus huntii</i>      |                       |
| NGNAS137414 | <i>Bombus</i> | <i>Bombus huntii</i>      |                       |
| NGNAS138114 | <i>Bombus</i> | <i>Bombus huntii</i>      |                       |
| NGNAS141214 | <i>Bombus</i> | <i>Bombus huntii</i>      |                       |
| NGNAT58014  | <i>Bombus</i> | <i>Bombus huntii</i>      |                       |
| NGNAT58214  | <i>Bombus</i> | <i>Bombus huntii</i>      |                       |
| NGNAT58414  | <i>Bombus</i> | <i>Bombus huntii</i>      |                       |
| NGNAT58514  | <i>Bombus</i> | <i>Bombus huntii</i>      |                       |
| NGNAT59214  | <i>Bombus</i> | <i>Bombus huntii</i>      |                       |
| NGNAT59514  | <i>Bombus</i> | <i>Bombus huntii</i>      |                       |
| NGNAY283914 | <i>Bombus</i> | <i>Bombus huntii</i>      |                       |
| NGNAY284114 | <i>Bombus</i> | <i>Bombus huntii</i>      |                       |
| SMTPL737915 | <i>Bombus</i> | <i>Bombus huntii</i>      |                       |
| SMTTP371715 | <i>Bombus</i> | <i>Bombus huntii</i>      |                       |
| BBWP64612   | <i>Bombus</i> | <i>Bombus hyperboreus</i> | <i>Bombus natvigi</i> |
| BEECF60011  | <i>Bombus</i> | <i>Bombus hyperboreus</i> | <i>Bombus natvigi</i> |

|             |               |                           |                       |
|-------------|---------------|---------------------------|-----------------------|
| BEECF71411  | <i>Bombus</i> | <i>Bombus hyperboreus</i> | <i>Bombus natvigi</i> |
| BEECF71511  | <i>Bombus</i> | <i>Bombus hyperboreus</i> | <i>Bombus natvigi</i> |
| BEECF71611  | <i>Bombus</i> | <i>Bombus hyperboreus</i> | <i>Bombus natvigi</i> |
| BEECF73011  | <i>Bombus</i> | <i>Bombus hyperboreus</i> | <i>Bombus natvigi</i> |
| GBAH067106  | <i>Bombus</i> | <i>Bombus hyperboreus</i> |                       |
| GBAH067206  | <i>Bombus</i> | <i>Bombus hyperboreus</i> |                       |
| GBAH067306  | <i>Bombus</i> | <i>Bombus hyperboreus</i> |                       |
| GRAFW309614 | <i>Bombus</i> | <i>Bombus hyperboreus</i> |                       |
| GRAFW309714 | <i>Bombus</i> | <i>Bombus hyperboreus</i> |                       |
| GRAFW309814 | <i>Bombus</i> | <i>Bombus hyperboreus</i> |                       |
| GRAFW310014 | <i>Bombus</i> | <i>Bombus hyperboreus</i> |                       |
| NOAPI56914  | <i>Bombus</i> | <i>Bombus hyperboreus</i> |                       |
| WASPS119218 | <i>Bombus</i> | <i>Bombus hyperboreus</i> | <i>Bombus natvigi</i> |
| WASPS119818 | <i>Bombus</i> | <i>Bombus hyperboreus</i> | <i>Bombus natvigi</i> |
| WASPS42214  | <i>Bombus</i> | <i>Bombus hyperboreus</i> |                       |
| WASPS70416  | <i>Bombus</i> | <i>Bombus hyperboreus</i> | <i>Bombus natvigi</i> |
| BBWP53710   | <i>Bombus</i> | <i>Bombus hypnorum</i>    |                       |
| BEEEE02815  | <i>Bombus</i> | <i>Bombus hypnorum</i>    |                       |
| BEEEE29016  | <i>Bombus</i> | <i>Bombus hypnorum</i>    |                       |
| FBAPC71811  | <i>Bombus</i> | <i>Bombus hypnorum</i>    |                       |
| FBHAP78909  | <i>Bombus</i> | <i>Bombus hypnorum</i>    |                       |
| FBHAP79009  | <i>Bombus</i> | <i>Bombus hypnorum</i>    |                       |
| GBAH035706  | <i>Bombus</i> | <i>Bombus hypnorum</i>    |                       |
| GBAH035806  | <i>Bombus</i> | <i>Bombus hypnorum</i>    |                       |
| GBAH035906  | <i>Bombus</i> | <i>Bombus hypnorum</i>    |                       |
| GBAH036006  | <i>Bombus</i> | <i>Bombus hypnorum</i>    |                       |
| GBAH036106  | <i>Bombus</i> | <i>Bombus hypnorum</i>    |                       |
| GBAH040906  | <i>Bombus</i> | <i>Bombus hypnorum</i>    |                       |
| GBAH067406  | <i>Bombus</i> | <i>Bombus hypnorum</i>    |                       |
| GBAH067506  | <i>Bombus</i> | <i>Bombus hypnorum</i>    |                       |
| GBAH067606  | <i>Bombus</i> | <i>Bombus hypnorum</i>    |                       |
| GBAH1832319 | <i>Bombus</i> | <i>Bombus hypnorum</i>    |                       |
| GBAH1832419 | <i>Bombus</i> | <i>Bombus hypnorum</i>    |                       |
| GBCHA59113  | <i>Bombus</i> | <i>Bombus hypnorum</i>    |                       |
| GMGMJ06314  | <i>Bombus</i> | <i>Bombus hypnorum</i>    |                       |
| GMGML14914  | <i>Bombus</i> | <i>Bombus hypnorum</i>    |                       |
| GMGMN02014  | <i>Bombus</i> | <i>Bombus hypnorum</i>    |                       |
| POLLE15418  | <i>Bombus</i> | <i>Bombus hypnorum</i>    |                       |
| POLLE53019  | <i>Bombus</i> | <i>Bombus hypnorum</i>    |                       |
| BBBO06610   | <i>Bombus</i> | <i>Bombus hypocrita</i>   |                       |
| BBBO16710   | <i>Bombus</i> | <i>Bombus hypocrita</i>   |                       |
| BBBO16810   | <i>Bombus</i> | <i>Bombus hypocrita</i>   |                       |
| BBBO25210   | <i>Bombus</i> | <i>Bombus hypocrita</i>   |                       |
| BBBO25310   | <i>Bombus</i> | <i>Bombus hypocrita</i>   |                       |
| BBBO25410   | <i>Bombus</i> | <i>Bombus hypocrita</i>   |                       |
| BBBO25510   | <i>Bombus</i> | <i>Bombus hypocrita</i>   |                       |

|             |               |                         |
|-------------|---------------|-------------------------|
| BBBO33610   | <i>Bombus</i> | <i>Bombus hypocrita</i> |
| BBBO37110   | <i>Bombus</i> | <i>Bombus hypocrita</i> |
| BBBO37210   | <i>Bombus</i> | <i>Bombus hypocrita</i> |
| BBBO42011   | <i>Bombus</i> | <i>Bombus hypocrita</i> |
| BBBO42311   | <i>Bombus</i> | <i>Bombus hypocrita</i> |
| BBWP55610   | <i>Bombus</i> | <i>Bombus hypocrita</i> |
| BBWP55710   | <i>Bombus</i> | <i>Bombus hypocrita</i> |
| BEECE29010  | <i>Bombus</i> | <i>Bombus hypocrita</i> |
| GBAH030706  | <i>Bombus</i> | <i>Bombus hypocrita</i> |
| GBAH030806  | <i>Bombus</i> | <i>Bombus hypocrita</i> |
| GBAH030906  | <i>Bombus</i> | <i>Bombus hypocrita</i> |
| GBAH031006  | <i>Bombus</i> | <i>Bombus hypocrita</i> |
| GBAH031106  | <i>Bombus</i> | <i>Bombus hypocrita</i> |
| GBAH031206  | <i>Bombus</i> | <i>Bombus hypocrita</i> |
| GBAH039706  | <i>Bombus</i> | <i>Bombus hypocrita</i> |
| GBAH039806  | <i>Bombus</i> | <i>Bombus hypocrita</i> |
| GBAH1774019 | <i>Bombus</i> | <i>Bombus hypocrita</i> |
| GBAH1774119 | <i>Bombus</i> | <i>Bombus hypocrita</i> |
| GBAH1774219 | <i>Bombus</i> | <i>Bombus hypocrita</i> |
| GBAH1774319 | <i>Bombus</i> | <i>Bombus hypocrita</i> |
| GBAH1774419 | <i>Bombus</i> | <i>Bombus hypocrita</i> |
| GBAH1774519 | <i>Bombus</i> | <i>Bombus hypocrita</i> |
| GBAH1774619 | <i>Bombus</i> | <i>Bombus hypocrita</i> |
| GBAH1774719 | <i>Bombus</i> | <i>Bombus hypocrita</i> |
| GBAH1774819 | <i>Bombus</i> | <i>Bombus hypocrita</i> |
| GBAH1774919 | <i>Bombus</i> | <i>Bombus hypocrita</i> |
| GBAH1775019 | <i>Bombus</i> | <i>Bombus hypocrita</i> |
| GBAH1775119 | <i>Bombus</i> | <i>Bombus hypocrita</i> |
| GBAH1775219 | <i>Bombus</i> | <i>Bombus hypocrita</i> |
| GBAH1775319 | <i>Bombus</i> | <i>Bombus hypocrita</i> |
| GBAH1775419 | <i>Bombus</i> | <i>Bombus hypocrita</i> |
| GBAH1775519 | <i>Bombus</i> | <i>Bombus hypocrita</i> |
| GBAH1775619 | <i>Bombus</i> | <i>Bombus hypocrita</i> |
| GBAH1775719 | <i>Bombus</i> | <i>Bombus hypocrita</i> |
| GBAH1775819 | <i>Bombus</i> | <i>Bombus hypocrita</i> |
| GBAH1775919 | <i>Bombus</i> | <i>Bombus hypocrita</i> |
| GBAH1776019 | <i>Bombus</i> | <i>Bombus hypocrita</i> |
| GBAH1776119 | <i>Bombus</i> | <i>Bombus hypocrita</i> |
| GBAH1776219 | <i>Bombus</i> | <i>Bombus hypocrita</i> |
| GBAH1776319 | <i>Bombus</i> | <i>Bombus hypocrita</i> |
| GBAH1780419 | <i>Bombus</i> | <i>Bombus hypocrita</i> |
| GBAH1780519 | <i>Bombus</i> | <i>Bombus hypocrita</i> |
| GBAH1780619 | <i>Bombus</i> | <i>Bombus hypocrita</i> |
| GBAH1780719 | <i>Bombus</i> | <i>Bombus hypocrita</i> |
| GBAH1780819 | <i>Bombus</i> | <i>Bombus hypocrita</i> |
| GBAH1780919 | <i>Bombus</i> | <i>Bombus hypocrita</i> |

|              |               |                         |
|--------------|---------------|-------------------------|
| GBAH1781019  | <i>Bombus</i> | <i>Bombus hypocrita</i> |
| GBAH1781119  | <i>Bombus</i> | <i>Bombus hypocrita</i> |
| GBAH1781219  | <i>Bombus</i> | <i>Bombus hypocrita</i> |
| GBAH1781319  | <i>Bombus</i> | <i>Bombus hypocrita</i> |
| GBAH1781419  | <i>Bombus</i> | <i>Bombus hypocrita</i> |
| GBAH1781519  | <i>Bombus</i> | <i>Bombus hypocrita</i> |
| GBAH1781619  | <i>Bombus</i> | <i>Bombus hypocrita</i> |
| GBAH1781719  | <i>Bombus</i> | <i>Bombus hypocrita</i> |
| GBMIN7059517 | <i>Bombus</i> | <i>Bombus hypocrita</i> |
| GBMIN7059617 | <i>Bombus</i> | <i>Bombus hypocrita</i> |
| GBMIN7059717 | <i>Bombus</i> | <i>Bombus hypocrita</i> |
| GBMIN7059817 | <i>Bombus</i> | <i>Bombus hypocrita</i> |
| GBMIN7059917 | <i>Bombus</i> | <i>Bombus hypocrita</i> |
| GBMIN7060017 | <i>Bombus</i> | <i>Bombus hypocrita</i> |
| GBMIN7060117 | <i>Bombus</i> | <i>Bombus hypocrita</i> |
| GBMIN7060217 | <i>Bombus</i> | <i>Bombus hypocrita</i> |
| GBMIN7060317 | <i>Bombus</i> | <i>Bombus hypocrita</i> |
| GBMIN7060417 | <i>Bombus</i> | <i>Bombus hypocrita</i> |
| GBMIN7060517 | <i>Bombus</i> | <i>Bombus hypocrita</i> |
| GBMIN7060617 | <i>Bombus</i> | <i>Bombus hypocrita</i> |
| GBMIN7060717 | <i>Bombus</i> | <i>Bombus hypocrita</i> |
| GBMIN7060817 | <i>Bombus</i> | <i>Bombus hypocrita</i> |
| GBMIN7060917 | <i>Bombus</i> | <i>Bombus hypocrita</i> |
| GBMIN7061017 | <i>Bombus</i> | <i>Bombus hypocrita</i> |
| GBMIN7061117 | <i>Bombus</i> | <i>Bombus hypocrita</i> |
| GBMIN7061217 | <i>Bombus</i> | <i>Bombus hypocrita</i> |
| GBMIN7061317 | <i>Bombus</i> | <i>Bombus hypocrita</i> |
| GBMIN7061417 | <i>Bombus</i> | <i>Bombus hypocrita</i> |
| GBMIN7061517 | <i>Bombus</i> | <i>Bombus hypocrita</i> |
| GBMIN7061617 | <i>Bombus</i> | <i>Bombus hypocrita</i> |
| GBMIN7061717 | <i>Bombus</i> | <i>Bombus hypocrita</i> |
| GBMIN7061817 | <i>Bombus</i> | <i>Bombus hypocrita</i> |
| GBMIN7061917 | <i>Bombus</i> | <i>Bombus hypocrita</i> |
| GBMIN7062017 | <i>Bombus</i> | <i>Bombus hypocrita</i> |
| GBMIN7062117 | <i>Bombus</i> | <i>Bombus hypocrita</i> |
| GBMIN7062217 | <i>Bombus</i> | <i>Bombus hypocrita</i> |
| GBMIN7062317 | <i>Bombus</i> | <i>Bombus hypocrita</i> |
| GBMIN7062417 | <i>Bombus</i> | <i>Bombus hypocrita</i> |
| GBMIN7062517 | <i>Bombus</i> | <i>Bombus hypocrita</i> |
| GBMIN7062617 | <i>Bombus</i> | <i>Bombus hypocrita</i> |
| GBMIN7062717 | <i>Bombus</i> | <i>Bombus hypocrita</i> |
| GBMIN7062817 | <i>Bombus</i> | <i>Bombus hypocrita</i> |
| GBMIN7062917 | <i>Bombus</i> | <i>Bombus hypocrita</i> |
| GBMIN7063017 | <i>Bombus</i> | <i>Bombus hypocrita</i> |
| GBMIN7063117 | <i>Bombus</i> | <i>Bombus hypocrita</i> |
| GBMIN7063217 | <i>Bombus</i> | <i>Bombus hypocrita</i> |

|              |               |                         |
|--------------|---------------|-------------------------|
| GBMIN7063317 | <i>Bombus</i> | <i>Bombus hypocrita</i> |
| GBMIN7063417 | <i>Bombus</i> | <i>Bombus hypocrita</i> |
| GBMIN7063517 | <i>Bombus</i> | <i>Bombus hypocrita</i> |
| GBMIN7063617 | <i>Bombus</i> | <i>Bombus hypocrita</i> |
| GBMIN7063717 | <i>Bombus</i> | <i>Bombus hypocrita</i> |
| GBMIN7063817 | <i>Bombus</i> | <i>Bombus hypocrita</i> |
| GBMIN7063917 | <i>Bombus</i> | <i>Bombus hypocrita</i> |
| GBMIN7064017 | <i>Bombus</i> | <i>Bombus hypocrita</i> |
| GBMIN7064117 | <i>Bombus</i> | <i>Bombus hypocrita</i> |
| GBMIN7064217 | <i>Bombus</i> | <i>Bombus hypocrita</i> |
| GBMIN7064317 | <i>Bombus</i> | <i>Bombus hypocrita</i> |
| GBMIN7064417 | <i>Bombus</i> | <i>Bombus hypocrita</i> |
| GBMIN7064517 | <i>Bombus</i> | <i>Bombus hypocrita</i> |
| GBMIN7064617 | <i>Bombus</i> | <i>Bombus hypocrita</i> |
| GBMIN7064717 | <i>Bombus</i> | <i>Bombus hypocrita</i> |
| GBMNA1891819 | <i>Bombus</i> | <i>Bombus hypocrita</i> |
| GBMNA1899419 | <i>Bombus</i> | <i>Bombus hypocrita</i> |
| GBMNA1899619 | <i>Bombus</i> | <i>Bombus hypocrita</i> |
| GBMNA997019  | <i>Bombus</i> | <i>Bombus hypocrita</i> |
| GBMTG126216  | <i>Bombus</i> | <i>Bombus hypocrita</i> |
| BBBO12810    | <i>Bombus</i> | <i>Bombus ignitus</i>   |
| BBBO12910    | <i>Bombus</i> | <i>Bombus ignitus</i>   |
| BBBO13010    | <i>Bombus</i> | <i>Bombus ignitus</i>   |
| BBBO13110    | <i>Bombus</i> | <i>Bombus ignitus</i>   |
| BBBO22510    | <i>Bombus</i> | <i>Bombus ignitus</i>   |
| BBBO22610    | <i>Bombus</i> | <i>Bombus ignitus</i>   |
| BBBO22710    | <i>Bombus</i> | <i>Bombus ignitus</i>   |
| BBBO25610    | <i>Bombus</i> | <i>Bombus ignitus</i>   |
| BBBO25710    | <i>Bombus</i> | <i>Bombus ignitus</i>   |
| BBBO40011    | <i>Bombus</i> | <i>Bombus ignitus</i>   |
| BBBO42411    | <i>Bombus</i> | <i>Bombus ignitus</i>   |
| BBBO42511    | <i>Bombus</i> | <i>Bombus ignitus</i>   |
| BBBO44611    | <i>Bombus</i> | <i>Bombus ignitus</i>   |
| GBAH031306   | <i>Bombus</i> | <i>Bombus ignitus</i>   |
| GBAH031406   | <i>Bombus</i> | <i>Bombus ignitus</i>   |
| GBAH031506   | <i>Bombus</i> | <i>Bombus ignitus</i>   |
| GBAH1648119  | <i>Bombus</i> | <i>Bombus ignitus</i>   |
| GBAH1778219  | <i>Bombus</i> | <i>Bombus ignitus</i>   |
| GBAH1778319  | <i>Bombus</i> | <i>Bombus ignitus</i>   |
| GBAH1778419  | <i>Bombus</i> | <i>Bombus ignitus</i>   |
| GBAH1778519  | <i>Bombus</i> | <i>Bombus ignitus</i>   |
| GBAH1778619  | <i>Bombus</i> | <i>Bombus ignitus</i>   |
| GBAH1778719  | <i>Bombus</i> | <i>Bombus ignitus</i>   |
| GBAH1778819  | <i>Bombus</i> | <i>Bombus ignitus</i>   |
| GBAH1778919  | <i>Bombus</i> | <i>Bombus ignitus</i>   |
| GBAH1779019  | <i>Bombus</i> | <i>Bombus ignitus</i>   |

|              |               |                       |
|--------------|---------------|-----------------------|
| GBAH1779119  | <i>Bombus</i> | <i>Bombus ignitus</i> |
| GBAH1779219  | <i>Bombus</i> | <i>Bombus ignitus</i> |
| GBAH1779319  | <i>Bombus</i> | <i>Bombus ignitus</i> |
| GBAH1779419  | <i>Bombus</i> | <i>Bombus ignitus</i> |
| GBAH1779519  | <i>Bombus</i> | <i>Bombus ignitus</i> |
| GBAH1779619  | <i>Bombus</i> | <i>Bombus ignitus</i> |
| GBAH1779719  | <i>Bombus</i> | <i>Bombus ignitus</i> |
| GBAH1779819  | <i>Bombus</i> | <i>Bombus ignitus</i> |
| GBAH1779919  | <i>Bombus</i> | <i>Bombus ignitus</i> |
| GBAH1780019  | <i>Bombus</i> | <i>Bombus ignitus</i> |
| GBAH1780119  | <i>Bombus</i> | <i>Bombus ignitus</i> |
| GBAH1780219  | <i>Bombus</i> | <i>Bombus ignitus</i> |
| GBAH1780319  | <i>Bombus</i> | <i>Bombus ignitus</i> |
| GBHAP00113   | <i>Bombus</i> | <i>Bombus ignitus</i> |
| GBHAP00213   | <i>Bombus</i> | <i>Bombus ignitus</i> |
| GBHAP00313   | <i>Bombus</i> | <i>Bombus ignitus</i> |
| GBHAP00413   | <i>Bombus</i> | <i>Bombus ignitus</i> |
| GBHAP00513   | <i>Bombus</i> | <i>Bombus ignitus</i> |
| GBHAP00613   | <i>Bombus</i> | <i>Bombus ignitus</i> |
| GBHAP00713   | <i>Bombus</i> | <i>Bombus ignitus</i> |
| GBHAP00813   | <i>Bombus</i> | <i>Bombus ignitus</i> |
| GBHAP00913   | <i>Bombus</i> | <i>Bombus ignitus</i> |
| GBHAP01013   | <i>Bombus</i> | <i>Bombus ignitus</i> |
| GBHAP01113   | <i>Bombus</i> | <i>Bombus ignitus</i> |
| GBHAP01213   | <i>Bombus</i> | <i>Bombus ignitus</i> |
| GBHAP01313   | <i>Bombus</i> | <i>Bombus ignitus</i> |
| GBHAP01413   | <i>Bombus</i> | <i>Bombus ignitus</i> |
| GBHAP01513   | <i>Bombus</i> | <i>Bombus ignitus</i> |
| GBHAP29513   | <i>Bombus</i> | <i>Bombus ignitus</i> |
| GBMIN1493913 | <i>Bombus</i> | <i>Bombus ignitus</i> |
| GBMIN1494013 | <i>Bombus</i> | <i>Bombus ignitus</i> |
| GBMIN1494113 | <i>Bombus</i> | <i>Bombus ignitus</i> |
| GBMIN1494213 | <i>Bombus</i> | <i>Bombus ignitus</i> |
| GBMIN1494313 | <i>Bombus</i> | <i>Bombus ignitus</i> |
| GBMIN1494413 | <i>Bombus</i> | <i>Bombus ignitus</i> |
| GBMIN1494513 | <i>Bombus</i> | <i>Bombus ignitus</i> |
| GBMIN1494613 | <i>Bombus</i> | <i>Bombus ignitus</i> |
| GBMIN1494713 | <i>Bombus</i> | <i>Bombus ignitus</i> |
| GBMIN1494813 | <i>Bombus</i> | <i>Bombus ignitus</i> |
| GBMIN1494913 | <i>Bombus</i> | <i>Bombus ignitus</i> |
| GBMIN1495013 | <i>Bombus</i> | <i>Bombus ignitus</i> |
| GBMIN1495113 | <i>Bombus</i> | <i>Bombus ignitus</i> |
| GBMIN1495213 | <i>Bombus</i> | <i>Bombus ignitus</i> |
| GBMIN1495313 | <i>Bombus</i> | <i>Bombus ignitus</i> |
| GBMIN1495413 | <i>Bombus</i> | <i>Bombus ignitus</i> |
| GBMIN1495513 | <i>Bombus</i> | <i>Bombus ignitus</i> |



|              |               |                       |
|--------------|---------------|-----------------------|
| GBMIN1495613 | <i>Bombus</i> | <i>Bombus ignitus</i> |
| GBMIN1495713 | <i>Bombus</i> | <i>Bombus ignitus</i> |
| GBMIN1495813 | <i>Bombus</i> | <i>Bombus ignitus</i> |
| GBMIN1495913 | <i>Bombus</i> | <i>Bombus ignitus</i> |
| GBMIN1496013 | <i>Bombus</i> | <i>Bombus ignitus</i> |
| GBMIN1496113 | <i>Bombus</i> | <i>Bombus ignitus</i> |
| GBMIN1496213 | <i>Bombus</i> | <i>Bombus ignitus</i> |
| GBMIN1496313 | <i>Bombus</i> | <i>Bombus ignitus</i> |
| GBMIN1496413 | <i>Bombus</i> | <i>Bombus ignitus</i> |
| GBMIN1496513 | <i>Bombus</i> | <i>Bombus ignitus</i> |
| GBMIN1496613 | <i>Bombus</i> | <i>Bombus ignitus</i> |
| GBMIN1496713 | <i>Bombus</i> | <i>Bombus ignitus</i> |
| GBMIN1496813 | <i>Bombus</i> | <i>Bombus ignitus</i> |
| GBMIN1496913 | <i>Bombus</i> | <i>Bombus ignitus</i> |
| GBMIN1497013 | <i>Bombus</i> | <i>Bombus ignitus</i> |
| GBMIN1497113 | <i>Bombus</i> | <i>Bombus ignitus</i> |
| GBMIN1497213 | <i>Bombus</i> | <i>Bombus ignitus</i> |
| GBMIN1497313 | <i>Bombus</i> | <i>Bombus ignitus</i> |
| GBMIN1497413 | <i>Bombus</i> | <i>Bombus ignitus</i> |
| GBMIN1497513 | <i>Bombus</i> | <i>Bombus ignitus</i> |
| GBMIN1497613 | <i>Bombus</i> | <i>Bombus ignitus</i> |
| GBMIN1497713 | <i>Bombus</i> | <i>Bombus ignitus</i> |
| GBMIN1497813 | <i>Bombus</i> | <i>Bombus ignitus</i> |
| GBMIN1497913 | <i>Bombus</i> | <i>Bombus ignitus</i> |
| GBMIN1498013 | <i>Bombus</i> | <i>Bombus ignitus</i> |
| GBMIN1498113 | <i>Bombus</i> | <i>Bombus ignitus</i> |
| GBMIN1498213 | <i>Bombus</i> | <i>Bombus ignitus</i> |
| GBMIN1505313 | <i>Bombus</i> | <i>Bombus ignitus</i> |
| GBMIN1505413 | <i>Bombus</i> | <i>Bombus ignitus</i> |
| GBMIN1505513 | <i>Bombus</i> | <i>Bombus ignitus</i> |
| GBMIN1505613 | <i>Bombus</i> | <i>Bombus ignitus</i> |
| GBMIN1505713 | <i>Bombus</i> | <i>Bombus ignitus</i> |
| GBMIN1505813 | <i>Bombus</i> | <i>Bombus ignitus</i> |
| GBMIN1505913 | <i>Bombus</i> | <i>Bombus ignitus</i> |
| GBMIN1506013 | <i>Bombus</i> | <i>Bombus ignitus</i> |
| GBMIN1506113 | <i>Bombus</i> | <i>Bombus ignitus</i> |
| GBMIN1506213 | <i>Bombus</i> | <i>Bombus ignitus</i> |
| GBMIN1506313 | <i>Bombus</i> | <i>Bombus ignitus</i> |
| GBMIN1506413 | <i>Bombus</i> | <i>Bombus ignitus</i> |
| GBMIN1506513 | <i>Bombus</i> | <i>Bombus ignitus</i> |
| GBMIN1506613 | <i>Bombus</i> | <i>Bombus ignitus</i> |
| GBMIN1506713 | <i>Bombus</i> | <i>Bombus ignitus</i> |
| GBMIN1506813 | <i>Bombus</i> | <i>Bombus ignitus</i> |
| GBMIN1506913 | <i>Bombus</i> | <i>Bombus ignitus</i> |
| GBMIN1507013 | <i>Bombus</i> | <i>Bombus ignitus</i> |
| GBMIN1507113 | <i>Bombus</i> | <i>Bombus ignitus</i> |

|              |               |                       |
|--------------|---------------|-----------------------|
| GBMIN1507213 | <i>Bombus</i> | <i>Bombus ignitus</i> |
| GBMIN1507313 | <i>Bombus</i> | <i>Bombus ignitus</i> |
| GBMIN1507413 | <i>Bombus</i> | <i>Bombus ignitus</i> |
| GBMIN1507513 | <i>Bombus</i> | <i>Bombus ignitus</i> |
| GBMIN1507613 | <i>Bombus</i> | <i>Bombus ignitus</i> |
| GBMIN1507713 | <i>Bombus</i> | <i>Bombus ignitus</i> |
| GBMIN1507813 | <i>Bombus</i> | <i>Bombus ignitus</i> |
| GBMIN1507913 | <i>Bombus</i> | <i>Bombus ignitus</i> |
| GBMIN1508013 | <i>Bombus</i> | <i>Bombus ignitus</i> |
| GBMIN1508113 | <i>Bombus</i> | <i>Bombus ignitus</i> |
| GBMIN1508213 | <i>Bombus</i> | <i>Bombus ignitus</i> |
| GBMIN1508313 | <i>Bombus</i> | <i>Bombus ignitus</i> |
| GBMIN1508413 | <i>Bombus</i> | <i>Bombus ignitus</i> |
| GBMIN1508513 | <i>Bombus</i> | <i>Bombus ignitus</i> |
| GBMIN1508613 | <i>Bombus</i> | <i>Bombus ignitus</i> |
| GBMIN1508713 | <i>Bombus</i> | <i>Bombus ignitus</i> |
| GBMIN1508813 | <i>Bombus</i> | <i>Bombus ignitus</i> |
| GBMIN1508913 | <i>Bombus</i> | <i>Bombus ignitus</i> |
| GBMIN1509013 | <i>Bombus</i> | <i>Bombus ignitus</i> |
| GBMIN1509113 | <i>Bombus</i> | <i>Bombus ignitus</i> |
| GBMIN1509213 | <i>Bombus</i> | <i>Bombus ignitus</i> |
| GBMIN1509313 | <i>Bombus</i> | <i>Bombus ignitus</i> |
| GBMIN1509413 | <i>Bombus</i> | <i>Bombus ignitus</i> |
| GBMIN1509513 | <i>Bombus</i> | <i>Bombus ignitus</i> |
| GBMIN1509613 | <i>Bombus</i> | <i>Bombus ignitus</i> |
| GBMIN7195817 | <i>Bombus</i> | <i>Bombus ignitus</i> |
| GBMIN7195917 | <i>Bombus</i> | <i>Bombus ignitus</i> |
| GBMIN7196017 | <i>Bombus</i> | <i>Bombus ignitus</i> |
| GBMIN7196117 | <i>Bombus</i> | <i>Bombus ignitus</i> |
| GBMIN7196217 | <i>Bombus</i> | <i>Bombus ignitus</i> |
| GBMIN7196317 | <i>Bombus</i> | <i>Bombus ignitus</i> |
| GBMIN7196417 | <i>Bombus</i> | <i>Bombus ignitus</i> |
| GBMIN7196517 | <i>Bombus</i> | <i>Bombus ignitus</i> |
| GBMIN7196617 | <i>Bombus</i> | <i>Bombus ignitus</i> |
| GBMIN7196717 | <i>Bombus</i> | <i>Bombus ignitus</i> |
| GBMIN7196817 | <i>Bombus</i> | <i>Bombus ignitus</i> |
| GBMIN7196917 | <i>Bombus</i> | <i>Bombus ignitus</i> |
| GBMIN7197017 | <i>Bombus</i> | <i>Bombus ignitus</i> |
| GBMIN7197117 | <i>Bombus</i> | <i>Bombus ignitus</i> |
| GBMIN7197217 | <i>Bombus</i> | <i>Bombus ignitus</i> |
| GBMIN7197317 | <i>Bombus</i> | <i>Bombus ignitus</i> |
| GBMIN7197417 | <i>Bombus</i> | <i>Bombus ignitus</i> |
| GBMIN7197517 | <i>Bombus</i> | <i>Bombus ignitus</i> |
| GBMIN7197617 | <i>Bombus</i> | <i>Bombus ignitus</i> |
| GBMIN7197717 | <i>Bombus</i> | <i>Bombus ignitus</i> |
| GBMIN7197817 | <i>Bombus</i> | <i>Bombus ignitus</i> |

|              |               |                       |
|--------------|---------------|-----------------------|
| GBMIN7197917 | <i>Bombus</i> | <i>Bombus ignitus</i> |
| GBMIN7198017 | <i>Bombus</i> | <i>Bombus ignitus</i> |
| GBMIN7198117 | <i>Bombus</i> | <i>Bombus ignitus</i> |
| GBMIN7198217 | <i>Bombus</i> | <i>Bombus ignitus</i> |
| GBMIN7198317 | <i>Bombus</i> | <i>Bombus ignitus</i> |
| GBMIN7198417 | <i>Bombus</i> | <i>Bombus ignitus</i> |
| GBMIN7198517 | <i>Bombus</i> | <i>Bombus ignitus</i> |
| GBMIN7198617 | <i>Bombus</i> | <i>Bombus ignitus</i> |
| GBMIN7198717 | <i>Bombus</i> | <i>Bombus ignitus</i> |
| GBMIN7198817 | <i>Bombus</i> | <i>Bombus ignitus</i> |
| GBMIN7198917 | <i>Bombus</i> | <i>Bombus ignitus</i> |
| GBMIN7199017 | <i>Bombus</i> | <i>Bombus ignitus</i> |
| GBMIN7199117 | <i>Bombus</i> | <i>Bombus ignitus</i> |
| GBMIN7199217 | <i>Bombus</i> | <i>Bombus ignitus</i> |
| GBMIN7199317 | <i>Bombus</i> | <i>Bombus ignitus</i> |
| GBMIN7199417 | <i>Bombus</i> | <i>Bombus ignitus</i> |
| GBMIN7199517 | <i>Bombus</i> | <i>Bombus ignitus</i> |
| GBMIN7199617 | <i>Bombus</i> | <i>Bombus ignitus</i> |
| GBMIN7199717 | <i>Bombus</i> | <i>Bombus ignitus</i> |
| GBMIN7199817 | <i>Bombus</i> | <i>Bombus ignitus</i> |
| GBMIN7199917 | <i>Bombus</i> | <i>Bombus ignitus</i> |
| GBMIN7200017 | <i>Bombus</i> | <i>Bombus ignitus</i> |
| GBMIN7200117 | <i>Bombus</i> | <i>Bombus ignitus</i> |
| GBMIN7200217 | <i>Bombus</i> | <i>Bombus ignitus</i> |
| GBMIN7200317 | <i>Bombus</i> | <i>Bombus ignitus</i> |
| GBMIN7200417 | <i>Bombus</i> | <i>Bombus ignitus</i> |
| GBMIN7200517 | <i>Bombus</i> | <i>Bombus ignitus</i> |
| GBMIN7200617 | <i>Bombus</i> | <i>Bombus ignitus</i> |
| GBMIN7200717 | <i>Bombus</i> | <i>Bombus ignitus</i> |
| GBMIN7200817 | <i>Bombus</i> | <i>Bombus ignitus</i> |
| GBMIN7200917 | <i>Bombus</i> | <i>Bombus ignitus</i> |
| GBMIN7201017 | <i>Bombus</i> | <i>Bombus ignitus</i> |
| GBMIN7201117 | <i>Bombus</i> | <i>Bombus ignitus</i> |
| GBMIN7201217 | <i>Bombus</i> | <i>Bombus ignitus</i> |
| GBMIN7201317 | <i>Bombus</i> | <i>Bombus ignitus</i> |
| GBMIN7201417 | <i>Bombus</i> | <i>Bombus ignitus</i> |
| GBMIN7201517 | <i>Bombus</i> | <i>Bombus ignitus</i> |
| GBMIN7201617 | <i>Bombus</i> | <i>Bombus ignitus</i> |
| GBMIN7201717 | <i>Bombus</i> | <i>Bombus ignitus</i> |
| GBMIN7201817 | <i>Bombus</i> | <i>Bombus ignitus</i> |
| GBMIN7201917 | <i>Bombus</i> | <i>Bombus ignitus</i> |
| GBMIN7202017 | <i>Bombus</i> | <i>Bombus ignitus</i> |
| GBMNA3286719 | <i>Bombus</i> | <i>Bombus ignitus</i> |
| GBMNA997119  | <i>Bombus</i> | <i>Bombus ignitus</i> |
| GBMNB6197020 | <i>Bombus</i> | <i>Bombus ignitus</i> |
| GBMNB6197120 | <i>Bombus</i> | <i>Bombus ignitus</i> |

|              |               |                         |
|--------------|---------------|-------------------------|
| GBMNB6197220 | <i>Bombus</i> | <i>Bombus ignitus</i>   |
| GBMNB6197320 | <i>Bombus</i> | <i>Bombus ignitus</i>   |
| GBMNB6197420 | <i>Bombus</i> | <i>Bombus ignitus</i>   |
| GBMNB6197520 | <i>Bombus</i> | <i>Bombus ignitus</i>   |
| GBMNB6197620 | <i>Bombus</i> | <i>Bombus ignitus</i>   |
| GBMNB6197720 | <i>Bombus</i> | <i>Bombus ignitus</i>   |
| GBMNB6197820 | <i>Bombus</i> | <i>Bombus ignitus</i>   |
| GBMNB6197920 | <i>Bombus</i> | <i>Bombus ignitus</i>   |
| GBMNB6198020 | <i>Bombus</i> | <i>Bombus ignitus</i>   |
| GBMNB6198120 | <i>Bombus</i> | <i>Bombus ignitus</i>   |
| GBMNB6198220 | <i>Bombus</i> | <i>Bombus ignitus</i>   |
| GBMNB6198320 | <i>Bombus</i> | <i>Bombus ignitus</i>   |
| GBMNB6198420 | <i>Bombus</i> | <i>Bombus ignitus</i>   |
| GBMNB6198520 | <i>Bombus</i> | <i>Bombus ignitus</i>   |
| GBMNB6198620 | <i>Bombus</i> | <i>Bombus ignitus</i>   |
| GBMNB6198720 | <i>Bombus</i> | <i>Bombus ignitus</i>   |
| GBMNB6198820 | <i>Bombus</i> | <i>Bombus ignitus</i>   |
| GBMNB6198920 | <i>Bombus</i> | <i>Bombus ignitus</i>   |
| GBMNB6199020 | <i>Bombus</i> | <i>Bombus ignitus</i>   |
| GBMNB6199120 | <i>Bombus</i> | <i>Bombus ignitus</i>   |
| GBMNB6199220 | <i>Bombus</i> | <i>Bombus ignitus</i>   |
| GBMNB6199320 | <i>Bombus</i> | <i>Bombus ignitus</i>   |
| GBMNB6199420 | <i>Bombus</i> | <i>Bombus ignitus</i>   |
| GBMNB6199520 | <i>Bombus</i> | <i>Bombus ignitus</i>   |
| GBMNB6199620 | <i>Bombus</i> | <i>Bombus ignitus</i>   |
| GBMNB6199720 | <i>Bombus</i> | <i>Bombus ignitus</i>   |
| GBMNB6199820 | <i>Bombus</i> | <i>Bombus ignitus</i>   |
| GBMNB6199920 | <i>Bombus</i> | <i>Bombus ignitus</i>   |
| GBMNB6200020 | <i>Bombus</i> | <i>Bombus ignitus</i>   |
| GBMNB6200120 | <i>Bombus</i> | <i>Bombus ignitus</i>   |
| GBMNB6200220 | <i>Bombus</i> | <i>Bombus ignitus</i>   |
| GBMNB6200320 | <i>Bombus</i> | <i>Bombus ignitus</i>   |
| GBMNB6200420 | <i>Bombus</i> | <i>Bombus ignitus</i>   |
| GBMNB6200520 | <i>Bombus</i> | <i>Bombus ignitus</i>   |
| GBMNB6200620 | <i>Bombus</i> | <i>Bombus ignitus</i>   |
| GBMTG118816  | <i>Bombus</i> | <i>Bombus ignitus</i>   |
| GMCHL03114   | <i>Bombus</i> | <i>Bombus ignitus</i>   |
| ASDHY07412   | <i>Bombus</i> | <i>Bombus impatiens</i> |
| ASGCB26313   | <i>Bombus</i> | <i>Bombus impatiens</i> |
| ASGLE77710   | <i>Bombus</i> | <i>Bombus impatiens</i> |
| ASGLE79910   | <i>Bombus</i> | <i>Bombus impatiens</i> |
| ASGLF00111   | <i>Bombus</i> | <i>Bombus impatiens</i> |
| ASGLF00211   | <i>Bombus</i> | <i>Bombus impatiens</i> |
| BEECA30006   | <i>Bombus</i> | <i>Bombus impatiens</i> |
| BEEMH11606   | <i>Bombus</i> | <i>Bombus impatiens</i> |
| BEEMH11706   | <i>Bombus</i> | <i>Bombus impatiens</i> |

|             |               |                         |
|-------------|---------------|-------------------------|
| BEEMH12406  | <i>Bombus</i> | <i>Bombus impatiens</i> |
| BEEMH24306  | <i>Bombus</i> | <i>Bombus impatiens</i> |
| BEO05004    | <i>Bombus</i> | <i>Bombus impatiens</i> |
| CRHIA38616  | <i>Bombus</i> | <i>Bombus impatiens</i> |
| CRHIA38716  | <i>Bombus</i> | <i>Bombus impatiens</i> |
| CRHIA63916  | <i>Bombus</i> | <i>Bombus impatiens</i> |
| CRHIB00515  | <i>Bombus</i> | <i>Bombus impatiens</i> |
| CRHIC44316  | <i>Bombus</i> | <i>Bombus impatiens</i> |
| CRHIC53616  | <i>Bombus</i> | <i>Bombus impatiens</i> |
| CRHIC67616  | <i>Bombus</i> | <i>Bombus impatiens</i> |
| CRHID124016 | <i>Bombus</i> | <i>Bombus impatiens</i> |
| CRHID126616 | <i>Bombus</i> | <i>Bombus impatiens</i> |
| CRHIE105416 | <i>Bombus</i> | <i>Bombus impatiens</i> |
| HCBNS19703  | <i>Bombus</i> | <i>Bombus impatiens</i> |
| HCBNS19803  | <i>Bombus</i> | <i>Bombus impatiens</i> |
| HCBNS19903  | <i>Bombus</i> | <i>Bombus impatiens</i> |
| HGPPH08110  | <i>Bombus</i> | <i>Bombus impatiens</i> |
| HGPPH08510  | <i>Bombus</i> | <i>Bombus impatiens</i> |
| HGPPH09410  | <i>Bombus</i> | <i>Bombus impatiens</i> |
| HYMBB00509  | <i>Bombus</i> | <i>Bombus impatiens</i> |
| OUIHY01209  | <i>Bombus</i> | <i>Bombus impatiens</i> |
| QUEBE00506  | <i>Bombus</i> | <i>Bombus impatiens</i> |
| QUEBE00706  | <i>Bombus</i> | <i>Bombus impatiens</i> |
| QUEBE01006  | <i>Bombus</i> | <i>Bombus impatiens</i> |
| QUEBE01206  | <i>Bombus</i> | <i>Bombus impatiens</i> |
| QUEBE01306  | <i>Bombus</i> | <i>Bombus impatiens</i> |
| QUEBE01406  | <i>Bombus</i> | <i>Bombus impatiens</i> |
| RRSSC659215 | <i>Bombus</i> | <i>Bombus impatiens</i> |
| SBGB07403   | <i>Bombus</i> | <i>Bombus impatiens</i> |
| TDWGB02610  | <i>Bombus</i> | <i>Bombus impatiens</i> |
| TDWGB03410  | <i>Bombus</i> | <i>Bombus impatiens</i> |
| TDWGB03510  | <i>Bombus</i> | <i>Bombus impatiens</i> |
| TDWGB03610  | <i>Bombus</i> | <i>Bombus impatiens</i> |
| TTMHY09808  | <i>Bombus</i> | <i>Bombus impatiens</i> |
| TTMHY09908  | <i>Bombus</i> | <i>Bombus impatiens</i> |
| TTMHY21408  | <i>Bombus</i> | <i>Bombus impatiens</i> |
| TTMHY21508  | <i>Bombus</i> | <i>Bombus impatiens</i> |
| TTMHY27308  | <i>Bombus</i> | <i>Bombus impatiens</i> |
| TTMHY28908  | <i>Bombus</i> | <i>Bombus impatiens</i> |
| TTMHY29008  | <i>Bombus</i> | <i>Bombus impatiens</i> |
| TTMHY38308  | <i>Bombus</i> | <i>Bombus impatiens</i> |
| TTMHY38408  | <i>Bombus</i> | <i>Bombus impatiens</i> |
| TTMHY45308  | <i>Bombus</i> | <i>Bombus impatiens</i> |
| TTMHY45408  | <i>Bombus</i> | <i>Bombus impatiens</i> |
| TTMHY45808  | <i>Bombus</i> | <i>Bombus impatiens</i> |
| TTMHY46008  | <i>Bombus</i> | <i>Bombus impatiens</i> |

|              |               |                          |
|--------------|---------------|--------------------------|
| TTMHY87311   | <i>Bombus</i> | <i>Bombus impatiens</i>  |
| TTMHY90111   | <i>Bombus</i> | <i>Bombus impatiens</i>  |
| TTMHY90511   | <i>Bombus</i> | <i>Bombus impatiens</i>  |
| TZBCA39307   | <i>Bombus</i> | <i>Bombus impatiens</i>  |
| UPOLB06409   | <i>Bombus</i> | <i>Bombus impatiens</i>  |
| UPOLB20809   | <i>Bombus</i> | <i>Bombus impatiens</i>  |
| UPOLB22009   | <i>Bombus</i> | <i>Bombus impatiens</i>  |
| UPOLB22509   | <i>Bombus</i> | <i>Bombus impatiens</i>  |
| UPOLB37109   | <i>Bombus</i> | <i>Bombus impatiens</i>  |
| UPOLB44209   | <i>Bombus</i> | <i>Bombus impatiens</i>  |
| UPOLB44709   | <i>Bombus</i> | <i>Bombus impatiens</i>  |
| UPOLB67009   | <i>Bombus</i> | <i>Bombus impatiens</i>  |
| UPOLB68509   | <i>Bombus</i> | <i>Bombus impatiens</i>  |
| UPOLB71009   | <i>Bombus</i> | <i>Bombus impatiens</i>  |
| UPOLB71209   | <i>Bombus</i> | <i>Bombus impatiens</i>  |
| UPOLB71409   | <i>Bombus</i> | <i>Bombus impatiens</i>  |
| UPOLB71509   | <i>Bombus</i> | <i>Bombus impatiens</i>  |
| UPOLB71609   | <i>Bombus</i> | <i>Bombus impatiens</i>  |
| UPOLB71709   | <i>Bombus</i> | <i>Bombus impatiens</i>  |
| UPOLB71909   | <i>Bombus</i> | <i>Bombus impatiens</i>  |
| UPOLB72009   | <i>Bombus</i> | <i>Bombus impatiens</i>  |
| UPOLB73909   | <i>Bombus</i> | <i>Bombus impatiens</i>  |
| UPOLL82709   | <i>Bombus</i> | <i>Bombus impatiens</i>  |
| GBMIN7202117 | <i>Bombus</i> | <i>Bombus impetuosus</i> |
| GBHAP91014   | <i>Bombus</i> | <i>Bombus incertus</i>   |
| AMCAF36019   | <i>Bombus</i> | <i>Bombus insularis</i>  |
| BBHYB03512   | <i>Bombus</i> | <i>Bombus insularis</i>  |
| BBHYL23710   | <i>Bombus</i> | <i>Bombus insularis</i>  |
| BBHYL23810   | <i>Bombus</i> | <i>Bombus insularis</i>  |
| BBHYL24010   | <i>Bombus</i> | <i>Bombus insularis</i>  |
| BBHYL24210   | <i>Bombus</i> | <i>Bombus insularis</i>  |
| BEECB61907   | <i>Bombus</i> | <i>Bombus insularis</i>  |
| BEECC81909   | <i>Bombus</i> | <i>Bombus insularis</i>  |
| CNFDD98614   | <i>Bombus</i> | <i>Bombus insularis</i>  |
| CNJAC99512   | <i>Bombus</i> | <i>Bombus insularis</i>  |
| CNRVB02615   | <i>Bombus</i> | <i>Bombus insularis</i>  |
| CNWLF196612  | <i>Bombus</i> | <i>Bombus insularis</i>  |
| GBAH1832519  | <i>Bombus</i> | <i>Bombus insularis</i>  |
| HDBNS22204   | <i>Bombus</i> | <i>Bombus insularis</i>  |
| HPPPB11213   | <i>Bombus</i> | <i>Bombus insularis</i>  |
| HPPPC10213   | <i>Bombus</i> | <i>Bombus insularis</i>  |
| HPPPD174913  | <i>Bombus</i> | <i>Bombus insularis</i>  |
| HPPPD175013  | <i>Bombus</i> | <i>Bombus insularis</i>  |
| HPPPF105313  | <i>Bombus</i> | <i>Bombus insularis</i>  |
| HPPPI131713  | <i>Bombus</i> | <i>Bombus insularis</i>  |
| NGNAJ00113   | <i>Bombus</i> | <i>Bombus insularis</i>  |

|             |               |                         |
|-------------|---------------|-------------------------|
| SSBAA572012 | <i>Bombus</i> | <i>Bombus insularis</i> |
| SSBAC350112 | <i>Bombus</i> | <i>Bombus insularis</i> |
| SSWLA387013 | <i>Bombus</i> | <i>Bombus insularis</i> |
| SSWLB147613 | <i>Bombus</i> | <i>Bombus insularis</i> |
| SSWLD374613 | <i>Bombus</i> | <i>Bombus insularis</i> |
| SSWLE06413  | <i>Bombus</i> | <i>Bombus insularis</i> |
| SSWLE06713  | <i>Bombus</i> | <i>Bombus insularis</i> |
| SSWLE226213 | <i>Bombus</i> | <i>Bombus insularis</i> |
| SSWLE228513 | <i>Bombus</i> | <i>Bombus insularis</i> |
| SSWLE767813 | <i>Bombus</i> | <i>Bombus insularis</i> |
| SSWLE767913 | <i>Bombus</i> | <i>Bombus insularis</i> |
| TTHYW44208  | <i>Bombus</i> | <i>Bombus insularis</i> |
| TTHYW47808  | <i>Bombus</i> | <i>Bombus insularis</i> |
| TTHYW49008  | <i>Bombus</i> | <i>Bombus insularis</i> |
| TTHYW67808  | <i>Bombus</i> | <i>Bombus insularis</i> |
| UAMIC73213  | <i>Bombus</i> | <i>Bombus insularis</i> |
| UAMIC73313  | <i>Bombus</i> | <i>Bombus insularis</i> |
| BBBO39411   | <i>Bombus</i> | <i>Bombus jacobsoni</i> |
| BBBO39611   | <i>Bombus</i> | <i>Bombus jacobsoni</i> |
| BBBO39711   | <i>Bombus</i> | <i>Bombus jacobsoni</i> |
| BEECA29506  | <i>Bombus</i> | <i>Bombus jonellus</i>  |
| BEEEE19215  | <i>Bombus</i> | <i>Bombus jonellus</i>  |
| BEEEE27916  | <i>Bombus</i> | <i>Bombus jonellus</i>  |
| BEEEE30916  | <i>Bombus</i> | <i>Bombus jonellus</i>  |
| CNIVA04814  | <i>Bombus</i> | <i>Bombus jonellus</i>  |
| CNNHA16014  | <i>Bombus</i> | <i>Bombus jonellus</i>  |
| CNNHB21914  | <i>Bombus</i> | <i>Bombus jonellus</i>  |
| FBAPD63211  | <i>Bombus</i> | <i>Bombus jonellus</i>  |
| FBAPD63311  | <i>Bombus</i> | <i>Bombus jonellus</i>  |
| FBAPD63411  | <i>Bombus</i> | <i>Bombus jonellus</i>  |
| FBAPD63511  | <i>Bombus</i> | <i>Bombus jonellus</i>  |
| GBAH036206  | <i>Bombus</i> | <i>Bombus jonellus</i>  |
| GBAH067706  | <i>Bombus</i> | <i>Bombus jonellus</i>  |
| GBAH1832619 | <i>Bombus</i> | <i>Bombus jonellus</i>  |
| GBAH1832719 | <i>Bombus</i> | <i>Bombus jonellus</i>  |
| GBAH1832819 | <i>Bombus</i> | <i>Bombus jonellus</i>  |
| GBAH1832919 | <i>Bombus</i> | <i>Bombus jonellus</i>  |
| GBAH1833019 | <i>Bombus</i> | <i>Bombus jonellus</i>  |
| GBAH1833119 | <i>Bombus</i> | <i>Bombus jonellus</i>  |
| GBAH1833219 | <i>Bombus</i> | <i>Bombus jonellus</i>  |
| GMGRA166813 | <i>Bombus</i> | <i>Bombus jonellus</i>  |
| GMGRD361313 | <i>Bombus</i> | <i>Bombus jonellus</i>  |
| IBBP06010   | <i>Bombus</i> | <i>Bombus jonellus</i>  |
| MHBEE04307  | <i>Bombus</i> | <i>Bombus jonellus</i>  |
| MHBEE06407  | <i>Bombus</i> | <i>Bombus jonellus</i>  |
| UAMIC74913  | <i>Bombus</i> | <i>Bombus jonellus</i>  |

|              |               |                            |                           |
|--------------|---------------|----------------------------|---------------------------|
| UAMIC75013   | <i>Bombus</i> | <i>Bombus jonellus</i>     |                           |
| GBMIN7202217 | <i>Bombus</i> | <i>Bombus kashmirensis</i> |                           |
| GBMNA4153119 | <i>Bombus</i> | <i>Bombus kashmirensis</i> |                           |
| GBHAP141015  | <i>Bombus</i> | <i>Bombus keriensis</i>    | <i>Bombus alagesianus</i> |
| GBHAP89014   | <i>Bombus</i> | <i>Bombus keriensis</i>    | <i>Bombus alagesianus</i> |
| BBWP63012    | <i>Bombus</i> | <i>Bombus kirbiellus</i>   |                           |
| BCIII08611   | <i>Bombus</i> | <i>Bombus kirbiellus</i>   |                           |
| BCIII08711   | <i>Bombus</i> | <i>Bombus kirbiellus</i>   |                           |
| BEECD73309   | <i>Bombus</i> | <i>Bombus kirbiellus</i>   |                           |
| BEECD85010   | <i>Bombus</i> | <i>Bombus kirbiellus</i>   |                           |
| WASPS69716   | <i>Bombus</i> | <i>Bombus kirbiellus</i>   |                           |
| WASPS69816   | <i>Bombus</i> | <i>Bombus kirbiellus</i>   |                           |
| WASPS70316   | <i>Bombus</i> | <i>Bombus kirbiellus</i>   |                           |
| WASPS70716   | <i>Bombus</i> | <i>Bombus kirbiellus</i>   |                           |
| WASPS70816   | <i>Bombus</i> | <i>Bombus kirbiellus</i>   |                           |
| WASPS70916   | <i>Bombus</i> | <i>Bombus kirbiellus</i>   |                           |
| WASPS94416   | <i>Bombus</i> | <i>Bombus kirbiellus</i>   |                           |
| BWTWO119410  | <i>Bombus</i> | <i>Bombus kluanensis</i>   |                           |
| BWTWO120410  | <i>Bombus</i> | <i>Bombus kluanensis</i>   |                           |
| INRMA324317  | <i>Bombus</i> | <i>Bombus kluanensis</i>   |                           |
| INRMA324417  | <i>Bombus</i> | <i>Bombus kluanensis</i>   |                           |
| INRMA324517  | <i>Bombus</i> | <i>Bombus kluanensis</i>   |                           |
| WASPS119318  | <i>Bombus</i> | <i>Bombus kluanensis</i>   |                           |
| WASPS119418  | <i>Bombus</i> | <i>Bombus kluanensis</i>   |                           |
| WASPS119518  | <i>Bombus</i> | <i>Bombus kluanensis</i>   |                           |
| WASPS119718  | <i>Bombus</i> | <i>Bombus kluanensis</i>   |                           |
| WASPS119918  | <i>Bombus</i> | <i>Bombus kluanensis</i>   |                           |
| WASPS120118  | <i>Bombus</i> | <i>Bombus kluanensis</i>   |                           |
| WASPS56615   | <i>Bombus</i> | <i>Bombus kluanensis</i>   |                           |
| WASPS56715   | <i>Bombus</i> | <i>Bombus kluanensis</i>   |                           |
| WASPS56815   | <i>Bombus</i> | <i>Bombus kluanensis</i>   |                           |
| WASPS85916   | <i>Bombus</i> | <i>Bombus kluanensis</i>   |                           |
| WASPS86016   | <i>Bombus</i> | <i>Bombus kluanensis</i>   |                           |
| WASPS94316   | <i>Bombus</i> | <i>Bombus kluanensis</i>   |                           |
| WASPS94516   | <i>Bombus</i> | <i>Bombus kluanensis</i>   |                           |
| WASPS94616   | <i>Bombus</i> | <i>Bombus kluanensis</i>   |                           |
| WASPS94716   | <i>Bombus</i> | <i>Bombus kluanensis</i>   |                           |
| WASPS94816   | <i>Bombus</i> | <i>Bombus kluanensis</i>   |                           |
| GBAH033406   | <i>Bombus</i> | <i>Bombus koreanus</i>     |                           |
| GBAH033506   | <i>Bombus</i> | <i>Bombus koreanus</i>     |                           |
| GBAH1091315  | <i>Bombus</i> | <i>Bombus koreanus</i>     |                           |
| GBAH1091415  | <i>Bombus</i> | <i>Bombus koreanus</i>     |                           |
| GBAH1091515  | <i>Bombus</i> | <i>Bombus koreanus</i>     |                           |
| GBAH1091615  | <i>Bombus</i> | <i>Bombus koreanus</i>     |                           |
| GBAH1091715  | <i>Bombus</i> | <i>Bombus koreanus</i>     |                           |
| GBAH1091815  | <i>Bombus</i> | <i>Bombus koreanus</i>     |                           |



|              |               |                              |
|--------------|---------------|------------------------------|
| GBAH1091915  | <i>Bombus</i> | <i>Bombus koreanus</i>       |
| GBMIN7202317 | <i>Bombus</i> | <i>Bombus koreanus</i>       |
| GBMIN7202417 | <i>Bombus</i> | <i>Bombus koreanus</i>       |
| GBMIN7202517 | <i>Bombus</i> | <i>Bombus ladakhensis</i>    |
| GBAH1655619  | <i>Bombus</i> | <i>Bombus laesus</i>         |
| GBAH1655719  | <i>Bombus</i> | <i>Bombus laesus</i>         |
| GBAH1833319  | <i>Bombus</i> | <i>Bombus laesus</i>         |
| GBAH1833419  | <i>Bombus</i> | <i>Bombus laesus</i>         |
| GBAH1833519  | <i>Bombus</i> | <i>Bombus laesus</i>         |
| GBAH1833619  | <i>Bombus</i> | <i>Bombus laesus</i>         |
| GBAH1833719  | <i>Bombus</i> | <i>Bombus laesus</i>         |
| GBAH1833819  | <i>Bombus</i> | <i>Bombus laesus</i>         |
| GBAH1833919  | <i>Bombus</i> | <i>Bombus laesus</i>         |
| GBAH1834019  | <i>Bombus</i> | <i>Bombus laesus</i>         |
| GBAH1834119  | <i>Bombus</i> | <i>Bombus laesus</i>         |
| GBMIN7202617 | <i>Bombus</i> | <i>Bombus laesus</i>         |
| GBMIN7202717 | <i>Bombus</i> | <i>Bombus laesus</i>         |
| GBMIN7202817 | <i>Bombus</i> | <i>Bombus laesus</i>         |
| GBMIN7202917 | <i>Bombus</i> | <i>Bombus laesus</i>         |
| GBMIN7203017 | <i>Bombus</i> | <i>Bombus laesus</i>         |
| GBMIN7203117 | <i>Bombus</i> | <i>Bombus laesus</i>         |
| GBMIN7203217 | <i>Bombus</i> | <i>Bombus laesus</i>         |
| GBMIN7203317 | <i>Bombus</i> | <i>Bombus laesus</i>         |
| GBMIN7203417 | <i>Bombus</i> | <i>Bombus laesus</i>         |
| GBMIN7203517 | <i>Bombus</i> | <i>Bombus laesus</i>         |
| GBMIN7203617 | <i>Bombus</i> | <i>Bombus laesus</i>         |
| GBMIN7203717 | <i>Bombus</i> | <i>Bombus laesus</i>         |
| BBBO00110    | <i>Bombus</i> | <i>Bombus lantschouensis</i> |
| BBBO00210    | <i>Bombus</i> | <i>Bombus lantschouensis</i> |
| BBBO00310    | <i>Bombus</i> | <i>Bombus lantschouensis</i> |
| BBBO00410    | <i>Bombus</i> | <i>Bombus lantschouensis</i> |
| BBBO00810    | <i>Bombus</i> | <i>Bombus lantschouensis</i> |
| BBBO00910    | <i>Bombus</i> | <i>Bombus lantschouensis</i> |
| BBBO13610    | <i>Bombus</i> | <i>Bombus lantschouensis</i> |
| BBBO13710    | <i>Bombus</i> | <i>Bombus lantschouensis</i> |
| BBBO22810    | <i>Bombus</i> | <i>Bombus lantschouensis</i> |
| BBBO22910    | <i>Bombus</i> | <i>Bombus lantschouensis</i> |
| BBBO23210    | <i>Bombus</i> | <i>Bombus lantschouensis</i> |
| BBBO23410    | <i>Bombus</i> | <i>Bombus lantschouensis</i> |
| BBBO23710    | <i>Bombus</i> | <i>Bombus lantschouensis</i> |
| BBBO26410    | <i>Bombus</i> | <i>Bombus lantschouensis</i> |
| BBBO26510    | <i>Bombus</i> | <i>Bombus lantschouensis</i> |
| BBBO26610    | <i>Bombus</i> | <i>Bombus lantschouensis</i> |
| BBBO26710    | <i>Bombus</i> | <i>Bombus lantschouensis</i> |
| BBBO27010    | <i>Bombus</i> | <i>Bombus lantschouensis</i> |
| BBBO27110    | <i>Bombus</i> | <i>Bombus lantschouensis</i> |

|              |               |                              |
|--------------|---------------|------------------------------|
| BBBO27210    | <i>Bombus</i> | <i>Bombus lantschouensis</i> |
| BBBO27310    | <i>Bombus</i> | <i>Bombus lantschouensis</i> |
| BBBO27510    | <i>Bombus</i> | <i>Bombus lantschouensis</i> |
| BBBO27610    | <i>Bombus</i> | <i>Bombus lantschouensis</i> |
| BBBO27710    | <i>Bombus</i> | <i>Bombus lantschouensis</i> |
| BBBO28110    | <i>Bombus</i> | <i>Bombus lantschouensis</i> |
| BBBO28310    | <i>Bombus</i> | <i>Bombus lantschouensis</i> |
| BBBO28410    | <i>Bombus</i> | <i>Bombus lantschouensis</i> |
| BBBO28510    | <i>Bombus</i> | <i>Bombus lantschouensis</i> |
| BBBO29010    | <i>Bombus</i> | <i>Bombus lantschouensis</i> |
| BBBO29110    | <i>Bombus</i> | <i>Bombus lantschouensis</i> |
| BBBO29210    | <i>Bombus</i> | <i>Bombus lantschouensis</i> |
| BBBO29310    | <i>Bombus</i> | <i>Bombus lantschouensis</i> |
| GBMIN7203817 | <i>Bombus</i> | <i>Bombus lantschouensis</i> |
| BEEEE02915   | <i>Bombus</i> | <i>Bombus lapidarius</i>     |
| BEEEE11215   | <i>Bombus</i> | <i>Bombus lapidarius</i>     |
| BEEEE27216   | <i>Bombus</i> | <i>Bombus lapidarius</i>     |
| BEEEE31016   | <i>Bombus</i> | <i>Bombus lapidarius</i>     |
| FBAPC70911   | <i>Bombus</i> | <i>Bombus lapidarius</i>     |
| FBHAP79709   | <i>Bombus</i> | <i>Bombus lapidarius</i>     |
| FBHAP79809   | <i>Bombus</i> | <i>Bombus lapidarius</i>     |
| GBACU231413  | <i>Bombus</i> | <i>Bombus lapidarius</i>     |
| GBACU241313  | <i>Bombus</i> | <i>Bombus lapidarius</i>     |
| GBACU241413  | <i>Bombus</i> | <i>Bombus lapidarius</i>     |
| GBACU241513  | <i>Bombus</i> | <i>Bombus lapidarius</i>     |
| GBACU345913  | <i>Bombus</i> | <i>Bombus lapidarius</i>     |
| GBACU346013  | <i>Bombus</i> | <i>Bombus lapidarius</i>     |
| GBACU96712   | <i>Bombus</i> | <i>Bombus lapidarius</i>     |
| GBAH067806   | <i>Bombus</i> | <i>Bombus lapidarius</i>     |
| GBAH067906   | <i>Bombus</i> | <i>Bombus lapidarius</i>     |
| GBAH1092015  | <i>Bombus</i> | <i>Bombus lapidarius</i>     |
| GBAH1649819  | <i>Bombus</i> | <i>Bombus lapidarius</i>     |
| GBAH1741719  | <i>Bombus</i> | <i>Bombus lapidarius</i>     |
| GBAH1834219  | <i>Bombus</i> | <i>Bombus lapidarius</i>     |
| GBCHA59613   | <i>Bombus</i> | <i>Bombus lapidarius</i>     |
| GBCHA59713   | <i>Bombus</i> | <i>Bombus lapidarius</i>     |
| GBHAP100014  | <i>Bombus</i> | <i>Bombus lapidarius</i>     |
| GBHAP100114  | <i>Bombus</i> | <i>Bombus lapidarius</i>     |
| GBHAP100214  | <i>Bombus</i> | <i>Bombus lapidarius</i>     |
| GBHAP100314  | <i>Bombus</i> | <i>Bombus lapidarius</i>     |
| GBHAP100414  | <i>Bombus</i> | <i>Bombus lapidarius</i>     |
| GBHAP100514  | <i>Bombus</i> | <i>Bombus lapidarius</i>     |
| GBHAP100614  | <i>Bombus</i> | <i>Bombus lapidarius</i>     |
| GBHAP100714  | <i>Bombus</i> | <i>Bombus lapidarius</i>     |
| GBHAP100814  | <i>Bombus</i> | <i>Bombus lapidarius</i>     |
| GBHAP100914  | <i>Bombus</i> | <i>Bombus lapidarius</i>     |

|             |               |                          |
|-------------|---------------|--------------------------|
| GBHAP101014 | <i>Bombus</i> | <i>Bombus lapidarius</i> |
| GBHAP101114 | <i>Bombus</i> | <i>Bombus lapidarius</i> |
| GBHAP101214 | <i>Bombus</i> | <i>Bombus lapidarius</i> |
| GBHAP101314 | <i>Bombus</i> | <i>Bombus lapidarius</i> |
| GBHAP101414 | <i>Bombus</i> | <i>Bombus lapidarius</i> |
| GBHAP101514 | <i>Bombus</i> | <i>Bombus lapidarius</i> |
| GBHAP101614 | <i>Bombus</i> | <i>Bombus lapidarius</i> |
| GBHAP101714 | <i>Bombus</i> | <i>Bombus lapidarius</i> |
| GBHAP101814 | <i>Bombus</i> | <i>Bombus lapidarius</i> |
| GBHAP101914 | <i>Bombus</i> | <i>Bombus lapidarius</i> |
| GBHAP102014 | <i>Bombus</i> | <i>Bombus lapidarius</i> |
| GBHAP102114 | <i>Bombus</i> | <i>Bombus lapidarius</i> |
| GBHAP102214 | <i>Bombus</i> | <i>Bombus lapidarius</i> |
| GBHAP102314 | <i>Bombus</i> | <i>Bombus lapidarius</i> |
| GBHAP102414 | <i>Bombus</i> | <i>Bombus lapidarius</i> |
| GBHAP102514 | <i>Bombus</i> | <i>Bombus lapidarius</i> |
| GBHAP102614 | <i>Bombus</i> | <i>Bombus lapidarius</i> |
| GBHAP102714 | <i>Bombus</i> | <i>Bombus lapidarius</i> |
| GBHAP102814 | <i>Bombus</i> | <i>Bombus lapidarius</i> |
| GBHAP102914 | <i>Bombus</i> | <i>Bombus lapidarius</i> |
| GBHAP103014 | <i>Bombus</i> | <i>Bombus lapidarius</i> |
| GBHAP103114 | <i>Bombus</i> | <i>Bombus lapidarius</i> |
| GBHAP103214 | <i>Bombus</i> | <i>Bombus lapidarius</i> |
| GBHAP103314 | <i>Bombus</i> | <i>Bombus lapidarius</i> |
| GBHAP103414 | <i>Bombus</i> | <i>Bombus lapidarius</i> |
| GBHAP103514 | <i>Bombus</i> | <i>Bombus lapidarius</i> |
| GBHAP103614 | <i>Bombus</i> | <i>Bombus lapidarius</i> |
| GBHAP103714 | <i>Bombus</i> | <i>Bombus lapidarius</i> |
| GBHAP103814 | <i>Bombus</i> | <i>Bombus lapidarius</i> |
| GBHAP103914 | <i>Bombus</i> | <i>Bombus lapidarius</i> |
| GBHAP104014 | <i>Bombus</i> | <i>Bombus lapidarius</i> |
| GBHAP104114 | <i>Bombus</i> | <i>Bombus lapidarius</i> |
| GBHAP104214 | <i>Bombus</i> | <i>Bombus lapidarius</i> |
| GBHAP104314 | <i>Bombus</i> | <i>Bombus lapidarius</i> |
| GBHAP104414 | <i>Bombus</i> | <i>Bombus lapidarius</i> |
| GBHAP104514 | <i>Bombus</i> | <i>Bombus lapidarius</i> |
| GBHAP104614 | <i>Bombus</i> | <i>Bombus lapidarius</i> |
| GBHAP104714 | <i>Bombus</i> | <i>Bombus lapidarius</i> |
| GBHAP104814 | <i>Bombus</i> | <i>Bombus lapidarius</i> |
| GBHAP104914 | <i>Bombus</i> | <i>Bombus lapidarius</i> |
| GBHAP105014 | <i>Bombus</i> | <i>Bombus lapidarius</i> |
| GBHAP105114 | <i>Bombus</i> | <i>Bombus lapidarius</i> |
| GBHAP105214 | <i>Bombus</i> | <i>Bombus lapidarius</i> |
| GBHAP105314 | <i>Bombus</i> | <i>Bombus lapidarius</i> |
| GBHAP105414 | <i>Bombus</i> | <i>Bombus lapidarius</i> |
| GBHAP105514 | <i>Bombus</i> | <i>Bombus lapidarius</i> |

|             |               |                          |
|-------------|---------------|--------------------------|
| GBHAP105614 | <i>Bombus</i> | <i>Bombus lapidarius</i> |
| GBHAP105714 | <i>Bombus</i> | <i>Bombus lapidarius</i> |
| GBHAP105814 | <i>Bombus</i> | <i>Bombus lapidarius</i> |
| GBHAP105914 | <i>Bombus</i> | <i>Bombus lapidarius</i> |
| GBHAP106014 | <i>Bombus</i> | <i>Bombus lapidarius</i> |
| GBHAP106114 | <i>Bombus</i> | <i>Bombus lapidarius</i> |
| GBHAP106214 | <i>Bombus</i> | <i>Bombus lapidarius</i> |
| GBHAP106314 | <i>Bombus</i> | <i>Bombus lapidarius</i> |
| GBHAP106414 | <i>Bombus</i> | <i>Bombus lapidarius</i> |
| GBHAP106514 | <i>Bombus</i> | <i>Bombus lapidarius</i> |
| GBHAP106614 | <i>Bombus</i> | <i>Bombus lapidarius</i> |
| GBHAP106714 | <i>Bombus</i> | <i>Bombus lapidarius</i> |
| GBHAP106814 | <i>Bombus</i> | <i>Bombus lapidarius</i> |
| GBHAP106914 | <i>Bombus</i> | <i>Bombus lapidarius</i> |
| GBHAP107014 | <i>Bombus</i> | <i>Bombus lapidarius</i> |
| GBHAP107114 | <i>Bombus</i> | <i>Bombus lapidarius</i> |
| GBHAP107214 | <i>Bombus</i> | <i>Bombus lapidarius</i> |
| GBHAP107314 | <i>Bombus</i> | <i>Bombus lapidarius</i> |
| GBHAP107414 | <i>Bombus</i> | <i>Bombus lapidarius</i> |
| GBHAP107514 | <i>Bombus</i> | <i>Bombus lapidarius</i> |
| GBHAP107614 | <i>Bombus</i> | <i>Bombus lapidarius</i> |
| GBHAP107714 | <i>Bombus</i> | <i>Bombus lapidarius</i> |
| GBHAP107814 | <i>Bombus</i> | <i>Bombus lapidarius</i> |
| GBHAP107914 | <i>Bombus</i> | <i>Bombus lapidarius</i> |
| GBHAP108014 | <i>Bombus</i> | <i>Bombus lapidarius</i> |
| GBHAP108114 | <i>Bombus</i> | <i>Bombus lapidarius</i> |
| GBHAP108214 | <i>Bombus</i> | <i>Bombus lapidarius</i> |
| GBHAP108314 | <i>Bombus</i> | <i>Bombus lapidarius</i> |
| GBHAP108414 | <i>Bombus</i> | <i>Bombus lapidarius</i> |
| GBHAP108514 | <i>Bombus</i> | <i>Bombus lapidarius</i> |
| GBHAP108614 | <i>Bombus</i> | <i>Bombus lapidarius</i> |
| GBHAP108714 | <i>Bombus</i> | <i>Bombus lapidarius</i> |
| GBHAP108814 | <i>Bombus</i> | <i>Bombus lapidarius</i> |
| GBHAP108914 | <i>Bombus</i> | <i>Bombus lapidarius</i> |
| GBHAP109014 | <i>Bombus</i> | <i>Bombus lapidarius</i> |
| GBHAP109114 | <i>Bombus</i> | <i>Bombus lapidarius</i> |
| GBHAP109214 | <i>Bombus</i> | <i>Bombus lapidarius</i> |
| GBHAP109314 | <i>Bombus</i> | <i>Bombus lapidarius</i> |
| GBHAP109414 | <i>Bombus</i> | <i>Bombus lapidarius</i> |
| GBHAP109514 | <i>Bombus</i> | <i>Bombus lapidarius</i> |
| GBHAP109614 | <i>Bombus</i> | <i>Bombus lapidarius</i> |
| GBHAP109714 | <i>Bombus</i> | <i>Bombus lapidarius</i> |
| GBHAP109814 | <i>Bombus</i> | <i>Bombus lapidarius</i> |
| GBHAP109914 | <i>Bombus</i> | <i>Bombus lapidarius</i> |
| GBHAP110014 | <i>Bombus</i> | <i>Bombus lapidarius</i> |
| GBHAP110114 | <i>Bombus</i> | <i>Bombus lapidarius</i> |

|             |               |                          |
|-------------|---------------|--------------------------|
| GBHAP110214 | <i>Bombus</i> | <i>Bombus lapidarius</i> |
| GBHAP110314 | <i>Bombus</i> | <i>Bombus lapidarius</i> |
| GBHAP110414 | <i>Bombus</i> | <i>Bombus lapidarius</i> |
| GBHAP110514 | <i>Bombus</i> | <i>Bombus lapidarius</i> |
| GBHAP110614 | <i>Bombus</i> | <i>Bombus lapidarius</i> |
| GBHAP110714 | <i>Bombus</i> | <i>Bombus lapidarius</i> |
| GBHAP110814 | <i>Bombus</i> | <i>Bombus lapidarius</i> |
| GBHAP110914 | <i>Bombus</i> | <i>Bombus lapidarius</i> |
| GBHAP111014 | <i>Bombus</i> | <i>Bombus lapidarius</i> |
| GBHAP111114 | <i>Bombus</i> | <i>Bombus lapidarius</i> |
| GBHAP111214 | <i>Bombus</i> | <i>Bombus lapidarius</i> |
| GBHAP111314 | <i>Bombus</i> | <i>Bombus lapidarius</i> |
| GBHAP111414 | <i>Bombus</i> | <i>Bombus lapidarius</i> |
| GBHAP111514 | <i>Bombus</i> | <i>Bombus lapidarius</i> |
| GBHAP111614 | <i>Bombus</i> | <i>Bombus lapidarius</i> |
| GBHAP111714 | <i>Bombus</i> | <i>Bombus lapidarius</i> |
| GBHAP111814 | <i>Bombus</i> | <i>Bombus lapidarius</i> |
| GBHAP111914 | <i>Bombus</i> | <i>Bombus lapidarius</i> |
| GBHAP112014 | <i>Bombus</i> | <i>Bombus lapidarius</i> |
| GBHAP112114 | <i>Bombus</i> | <i>Bombus lapidarius</i> |
| GBHAP112214 | <i>Bombus</i> | <i>Bombus lapidarius</i> |
| GBHAP112314 | <i>Bombus</i> | <i>Bombus lapidarius</i> |
| GBHAP112414 | <i>Bombus</i> | <i>Bombus lapidarius</i> |
| GBHAP112514 | <i>Bombus</i> | <i>Bombus lapidarius</i> |
| GBHAP112614 | <i>Bombus</i> | <i>Bombus lapidarius</i> |
| GBHAP112714 | <i>Bombus</i> | <i>Bombus lapidarius</i> |
| GBHAP112814 | <i>Bombus</i> | <i>Bombus lapidarius</i> |
| GBHAP112914 | <i>Bombus</i> | <i>Bombus lapidarius</i> |
| GBHAP113014 | <i>Bombus</i> | <i>Bombus lapidarius</i> |
| GBHAP113114 | <i>Bombus</i> | <i>Bombus lapidarius</i> |
| GBHAP113214 | <i>Bombus</i> | <i>Bombus lapidarius</i> |
| GBHAP113314 | <i>Bombus</i> | <i>Bombus lapidarius</i> |
| GBHAP113414 | <i>Bombus</i> | <i>Bombus lapidarius</i> |
| GBHAP113514 | <i>Bombus</i> | <i>Bombus lapidarius</i> |
| GBHAP113614 | <i>Bombus</i> | <i>Bombus lapidarius</i> |
| GBHAP113714 | <i>Bombus</i> | <i>Bombus lapidarius</i> |
| GBHAP113814 | <i>Bombus</i> | <i>Bombus lapidarius</i> |
| GBHAP113914 | <i>Bombus</i> | <i>Bombus lapidarius</i> |
| GBHAP114014 | <i>Bombus</i> | <i>Bombus lapidarius</i> |
| GBHAP114114 | <i>Bombus</i> | <i>Bombus lapidarius</i> |
| GBHAP114214 | <i>Bombus</i> | <i>Bombus lapidarius</i> |
| GBHAP114314 | <i>Bombus</i> | <i>Bombus lapidarius</i> |
| GBHAP114414 | <i>Bombus</i> | <i>Bombus lapidarius</i> |
| GBHAP114514 | <i>Bombus</i> | <i>Bombus lapidarius</i> |
| GBHAP114614 | <i>Bombus</i> | <i>Bombus lapidarius</i> |
| GBHAP114714 | <i>Bombus</i> | <i>Bombus lapidarius</i> |

|             |               |                          |
|-------------|---------------|--------------------------|
| GBHAP114814 | <i>Bombus</i> | <i>Bombus lapidarius</i> |
| GBHAP114914 | <i>Bombus</i> | <i>Bombus lapidarius</i> |
| GBHAP115014 | <i>Bombus</i> | <i>Bombus lapidarius</i> |
| GBHAP115114 | <i>Bombus</i> | <i>Bombus lapidarius</i> |
| GBHAP115214 | <i>Bombus</i> | <i>Bombus lapidarius</i> |
| GBHAP91114  | <i>Bombus</i> | <i>Bombus lapidarius</i> |
| GBHAP91714  | <i>Bombus</i> | <i>Bombus lapidarius</i> |
| GBHAP91814  | <i>Bombus</i> | <i>Bombus lapidarius</i> |
| GBHAP91914  | <i>Bombus</i> | <i>Bombus lapidarius</i> |
| GBHAP92014  | <i>Bombus</i> | <i>Bombus lapidarius</i> |
| GBHAP92114  | <i>Bombus</i> | <i>Bombus lapidarius</i> |
| GBHAP92214  | <i>Bombus</i> | <i>Bombus lapidarius</i> |
| GBHAP92314  | <i>Bombus</i> | <i>Bombus lapidarius</i> |
| GBHAP92414  | <i>Bombus</i> | <i>Bombus lapidarius</i> |
| GBHAP92514  | <i>Bombus</i> | <i>Bombus lapidarius</i> |
| GBHAP92614  | <i>Bombus</i> | <i>Bombus lapidarius</i> |
| GBHAP92714  | <i>Bombus</i> | <i>Bombus lapidarius</i> |
| GBHAP92814  | <i>Bombus</i> | <i>Bombus lapidarius</i> |
| GBHAP92914  | <i>Bombus</i> | <i>Bombus lapidarius</i> |
| GBHAP93014  | <i>Bombus</i> | <i>Bombus lapidarius</i> |
| GBHAP93114  | <i>Bombus</i> | <i>Bombus lapidarius</i> |
| GBHAP93214  | <i>Bombus</i> | <i>Bombus lapidarius</i> |
| GBHAP93314  | <i>Bombus</i> | <i>Bombus lapidarius</i> |
| GBHAP93414  | <i>Bombus</i> | <i>Bombus lapidarius</i> |
| GBHAP93514  | <i>Bombus</i> | <i>Bombus lapidarius</i> |
| GBHAP93614  | <i>Bombus</i> | <i>Bombus lapidarius</i> |
| GBHAP93714  | <i>Bombus</i> | <i>Bombus lapidarius</i> |
| GBHAP93814  | <i>Bombus</i> | <i>Bombus lapidarius</i> |
| GBHAP93914  | <i>Bombus</i> | <i>Bombus lapidarius</i> |
| GBHAP94014  | <i>Bombus</i> | <i>Bombus lapidarius</i> |
| GBHAP94114  | <i>Bombus</i> | <i>Bombus lapidarius</i> |
| GBHAP94214  | <i>Bombus</i> | <i>Bombus lapidarius</i> |
| GBHAP94314  | <i>Bombus</i> | <i>Bombus lapidarius</i> |
| GBHAP94414  | <i>Bombus</i> | <i>Bombus lapidarius</i> |
| GBHAP94514  | <i>Bombus</i> | <i>Bombus lapidarius</i> |
| GBHAP94614  | <i>Bombus</i> | <i>Bombus lapidarius</i> |
| GBHAP94714  | <i>Bombus</i> | <i>Bombus lapidarius</i> |
| GBHAP94814  | <i>Bombus</i> | <i>Bombus lapidarius</i> |
| GBHAP94914  | <i>Bombus</i> | <i>Bombus lapidarius</i> |
| GBHAP95014  | <i>Bombus</i> | <i>Bombus lapidarius</i> |
| GBHAP95114  | <i>Bombus</i> | <i>Bombus lapidarius</i> |
| GBHAP95214  | <i>Bombus</i> | <i>Bombus lapidarius</i> |
| GBHAP95314  | <i>Bombus</i> | <i>Bombus lapidarius</i> |
| GBHAP95414  | <i>Bombus</i> | <i>Bombus lapidarius</i> |
| GBHAP95514  | <i>Bombus</i> | <i>Bombus lapidarius</i> |
| GBHAP95614  | <i>Bombus</i> | <i>Bombus lapidarius</i> |

|              |               |                          |
|--------------|---------------|--------------------------|
| GBHAP95714   | <i>Bombus</i> | <i>Bombus lapidarius</i> |
| GBHAP95814   | <i>Bombus</i> | <i>Bombus lapidarius</i> |
| GBHAP95914   | <i>Bombus</i> | <i>Bombus lapidarius</i> |
| GBHAP96014   | <i>Bombus</i> | <i>Bombus lapidarius</i> |
| GBHAP96114   | <i>Bombus</i> | <i>Bombus lapidarius</i> |
| GBHAP96214   | <i>Bombus</i> | <i>Bombus lapidarius</i> |
| GBHAP96314   | <i>Bombus</i> | <i>Bombus lapidarius</i> |
| GBHAP96414   | <i>Bombus</i> | <i>Bombus lapidarius</i> |
| GBHAP96514   | <i>Bombus</i> | <i>Bombus lapidarius</i> |
| GBHAP96614   | <i>Bombus</i> | <i>Bombus lapidarius</i> |
| GBHAP96714   | <i>Bombus</i> | <i>Bombus lapidarius</i> |
| GBHAP96814   | <i>Bombus</i> | <i>Bombus lapidarius</i> |
| GBHAP96914   | <i>Bombus</i> | <i>Bombus lapidarius</i> |
| GBHAP97014   | <i>Bombus</i> | <i>Bombus lapidarius</i> |
| GBHAP97114   | <i>Bombus</i> | <i>Bombus lapidarius</i> |
| GBHAP97214   | <i>Bombus</i> | <i>Bombus lapidarius</i> |
| GBHAP97314   | <i>Bombus</i> | <i>Bombus lapidarius</i> |
| GBHAP97414   | <i>Bombus</i> | <i>Bombus lapidarius</i> |
| GBHAP97514   | <i>Bombus</i> | <i>Bombus lapidarius</i> |
| GBHAP97614   | <i>Bombus</i> | <i>Bombus lapidarius</i> |
| GBHAP97714   | <i>Bombus</i> | <i>Bombus lapidarius</i> |
| GBHAP97814   | <i>Bombus</i> | <i>Bombus lapidarius</i> |
| GBHAP97914   | <i>Bombus</i> | <i>Bombus lapidarius</i> |
| GBHAP98014   | <i>Bombus</i> | <i>Bombus lapidarius</i> |
| GBHAP98114   | <i>Bombus</i> | <i>Bombus lapidarius</i> |
| GBHAP98214   | <i>Bombus</i> | <i>Bombus lapidarius</i> |
| GBHAP98314   | <i>Bombus</i> | <i>Bombus lapidarius</i> |
| GBHAP98414   | <i>Bombus</i> | <i>Bombus lapidarius</i> |
| GBHAP98514   | <i>Bombus</i> | <i>Bombus lapidarius</i> |
| GBHAP98614   | <i>Bombus</i> | <i>Bombus lapidarius</i> |
| GBHAP98714   | <i>Bombus</i> | <i>Bombus lapidarius</i> |
| GBHAP98814   | <i>Bombus</i> | <i>Bombus lapidarius</i> |
| GBHAP98914   | <i>Bombus</i> | <i>Bombus lapidarius</i> |
| GBHAP99014   | <i>Bombus</i> | <i>Bombus lapidarius</i> |
| GBHAP99114   | <i>Bombus</i> | <i>Bombus lapidarius</i> |
| GBHAP99214   | <i>Bombus</i> | <i>Bombus lapidarius</i> |
| GBHAP99314   | <i>Bombus</i> | <i>Bombus lapidarius</i> |
| GBHAP99414   | <i>Bombus</i> | <i>Bombus lapidarius</i> |
| GBHAP99514   | <i>Bombus</i> | <i>Bombus lapidarius</i> |
| GBHAP99614   | <i>Bombus</i> | <i>Bombus lapidarius</i> |
| GBHAP99714   | <i>Bombus</i> | <i>Bombus lapidarius</i> |
| GBHAP99814   | <i>Bombus</i> | <i>Bombus lapidarius</i> |
| GBHAP99914   | <i>Bombus</i> | <i>Bombus lapidarius</i> |
| GBLGC00812   | <i>Bombus</i> | <i>Bombus lapidarius</i> |
| GBMIN7203917 | <i>Bombus</i> | <i>Bombus lapidarius</i> |
| GBMIN7204017 | <i>Bombus</i> | <i>Bombus lapidarius</i> |

|              |               |                          |
|--------------|---------------|--------------------------|
| GBMIN7204117 | <i>Bombus</i> | <i>Bombus lapidarius</i> |
| GBMIN7204217 | <i>Bombus</i> | <i>Bombus lapidarius</i> |
| GBMIN7204317 | <i>Bombus</i> | <i>Bombus lapidarius</i> |
| GMBUA09714   | <i>Bombus</i> | <i>Bombus lapidarius</i> |
| GMGMA39514   | <i>Bombus</i> | <i>Bombus lapidarius</i> |
| GMGMA41714   | <i>Bombus</i> | <i>Bombus lapidarius</i> |
| GMGMA42514   | <i>Bombus</i> | <i>Bombus lapidarius</i> |
| GMGMA45114   | <i>Bombus</i> | <i>Bombus lapidarius</i> |
| GMGMA46014   | <i>Bombus</i> | <i>Bombus lapidarius</i> |
| GMGMA46314   | <i>Bombus</i> | <i>Bombus lapidarius</i> |
| GMGMA47214   | <i>Bombus</i> | <i>Bombus lapidarius</i> |
| GMGMA47414   | <i>Bombus</i> | <i>Bombus lapidarius</i> |
| GMGMA54514   | <i>Bombus</i> | <i>Bombus lapidarius</i> |
| GMGMA54814   | <i>Bombus</i> | <i>Bombus lapidarius</i> |
| GMGMA55614   | <i>Bombus</i> | <i>Bombus lapidarius</i> |
| GMGMA56114   | <i>Bombus</i> | <i>Bombus lapidarius</i> |
| GMGMA59814   | <i>Bombus</i> | <i>Bombus lapidarius</i> |
| GMGMA61314   | <i>Bombus</i> | <i>Bombus lapidarius</i> |
| GMGMB50314   | <i>Bombus</i> | <i>Bombus lapidarius</i> |
| GMGMB50614   | <i>Bombus</i> | <i>Bombus lapidarius</i> |
| GMGMB50714   | <i>Bombus</i> | <i>Bombus lapidarius</i> |
| GMGMB50814   | <i>Bombus</i> | <i>Bombus lapidarius</i> |
| GMGMB51314   | <i>Bombus</i> | <i>Bombus lapidarius</i> |
| GMGMB51414   | <i>Bombus</i> | <i>Bombus lapidarius</i> |
| GMGMB51514   | <i>Bombus</i> | <i>Bombus lapidarius</i> |
| GMGMB51714   | <i>Bombus</i> | <i>Bombus lapidarius</i> |
| GMGMB52114   | <i>Bombus</i> | <i>Bombus lapidarius</i> |
| GMGMB52714   | <i>Bombus</i> | <i>Bombus lapidarius</i> |
| GMGMB53214   | <i>Bombus</i> | <i>Bombus lapidarius</i> |
| GMGMB53314   | <i>Bombus</i> | <i>Bombus lapidarius</i> |
| GMGMB53414   | <i>Bombus</i> | <i>Bombus lapidarius</i> |
| GMGMB54214   | <i>Bombus</i> | <i>Bombus lapidarius</i> |
| GMGMB54714   | <i>Bombus</i> | <i>Bombus lapidarius</i> |
| GMGMB55014   | <i>Bombus</i> | <i>Bombus lapidarius</i> |
| GMGMB55114   | <i>Bombus</i> | <i>Bombus lapidarius</i> |
| GMGMB55414   | <i>Bombus</i> | <i>Bombus lapidarius</i> |
| GMGMC14214   | <i>Bombus</i> | <i>Bombus lapidarius</i> |
| GMGMC15014   | <i>Bombus</i> | <i>Bombus lapidarius</i> |
| GMGMC15614   | <i>Bombus</i> | <i>Bombus lapidarius</i> |
| GMGMC15714   | <i>Bombus</i> | <i>Bombus lapidarius</i> |
| GMGMC15914   | <i>Bombus</i> | <i>Bombus lapidarius</i> |
| GMGMC16414   | <i>Bombus</i> | <i>Bombus lapidarius</i> |
| GMGMC16914   | <i>Bombus</i> | <i>Bombus lapidarius</i> |
| GMGMC18114   | <i>Bombus</i> | <i>Bombus lapidarius</i> |
| GMGMC20214   | <i>Bombus</i> | <i>Bombus lapidarius</i> |
| GMGMC20714   | <i>Bombus</i> | <i>Bombus lapidarius</i> |



|             |               |                          |
|-------------|---------------|--------------------------|
| GMGMC21614  | <i>Bombus</i> | <i>Bombus lapidarius</i> |
| GMGMC21814  | <i>Bombus</i> | <i>Bombus lapidarius</i> |
| GMGMC21914  | <i>Bombus</i> | <i>Bombus lapidarius</i> |
| GMGMC22714  | <i>Bombus</i> | <i>Bombus lapidarius</i> |
| GMGMD15814  | <i>Bombus</i> | <i>Bombus lapidarius</i> |
| GMGMJ07814  | <i>Bombus</i> | <i>Bombus lapidarius</i> |
| GMGMJ09414  | <i>Bombus</i> | <i>Bombus lapidarius</i> |
| GMGMK09314  | <i>Bombus</i> | <i>Bombus lapidarius</i> |
| GMGMK11114  | <i>Bombus</i> | <i>Bombus lapidarius</i> |
| GMGMK14014  | <i>Bombus</i> | <i>Bombus lapidarius</i> |
| GMGML10314  | <i>Bombus</i> | <i>Bombus lapidarius</i> |
| GMGML11114  | <i>Bombus</i> | <i>Bombus lapidarius</i> |
| GMGML12314  | <i>Bombus</i> | <i>Bombus lapidarius</i> |
| GMGML13614  | <i>Bombus</i> | <i>Bombus lapidarius</i> |
| GMGML13814  | <i>Bombus</i> | <i>Bombus lapidarius</i> |
| GMGML15614  | <i>Bombus</i> | <i>Bombus lapidarius</i> |
| GMGMM12814  | <i>Bombus</i> | <i>Bombus lapidarius</i> |
| GMGMM14914  | <i>Bombus</i> | <i>Bombus lapidarius</i> |
| GMGMM16214  | <i>Bombus</i> | <i>Bombus lapidarius</i> |
| GMGMM17514  | <i>Bombus</i> | <i>Bombus lapidarius</i> |
| GMGMM17914  | <i>Bombus</i> | <i>Bombus lapidarius</i> |
| GMGMM18514  | <i>Bombus</i> | <i>Bombus lapidarius</i> |
| GMGMM18714  | <i>Bombus</i> | <i>Bombus lapidarius</i> |
| GMGMM19014  | <i>Bombus</i> | <i>Bombus lapidarius</i> |
| GMGMM19214  | <i>Bombus</i> | <i>Bombus lapidarius</i> |
| GMGMN01014  | <i>Bombus</i> | <i>Bombus lapidarius</i> |
| GMGMN01114  | <i>Bombus</i> | <i>Bombus lapidarius</i> |
| GMGMN01514  | <i>Bombus</i> | <i>Bombus lapidarius</i> |
| GMGMN01814  | <i>Bombus</i> | <i>Bombus lapidarius</i> |
| GMGMN02814  | <i>Bombus</i> | <i>Bombus lapidarius</i> |
| GMGMN03114  | <i>Bombus</i> | <i>Bombus lapidarius</i> |
| GMGMN03214  | <i>Bombus</i> | <i>Bombus lapidarius</i> |
| GMGMN03314  | <i>Bombus</i> | <i>Bombus lapidarius</i> |
| GMGMN03814  | <i>Bombus</i> | <i>Bombus lapidarius</i> |
| GMGMN03914  | <i>Bombus</i> | <i>Bombus lapidarius</i> |
| GMGMN15714  | <i>Bombus</i> | <i>Bombus lapidarius</i> |
| GMGMN16314  | <i>Bombus</i> | <i>Bombus lapidarius</i> |
| GMGMN27514  | <i>Bombus</i> | <i>Bombus lapidarius</i> |
| IBBP06110   | <i>Bombus</i> | <i>Bombus lapidarius</i> |
| IBBP06210   | <i>Bombus</i> | <i>Bombus lapidarius</i> |
| IBBP06310   | <i>Bombus</i> | <i>Bombus lapidarius</i> |
| IBBP06410   | <i>Bombus</i> | <i>Bombus lapidarius</i> |
| POLLE165419 | <i>Bombus</i> | <i>Bombus lapidarius</i> |
| POLLE18718  | <i>Bombus</i> | <i>Bombus lapidarius</i> |
| POLLE192219 | <i>Bombus</i> | <i>Bombus lapidarius</i> |
| POLLE195219 | <i>Bombus</i> | <i>Bombus lapidarius</i> |

|             |               |                          |
|-------------|---------------|--------------------------|
| POLLE195519 | <i>Bombus</i> | <i>Bombus lapidarius</i> |
| POLLE196519 | <i>Bombus</i> | <i>Bombus lapidarius</i> |
| POLLE196819 | <i>Bombus</i> | <i>Bombus lapidarius</i> |
| POLLE204519 | <i>Bombus</i> | <i>Bombus lapidarius</i> |
| POLLE232519 | <i>Bombus</i> | <i>Bombus lapidarius</i> |
| POLLE232619 | <i>Bombus</i> | <i>Bombus lapidarius</i> |
| POLLE233319 | <i>Bombus</i> | <i>Bombus lapidarius</i> |
| POLLE233419 | <i>Bombus</i> | <i>Bombus lapidarius</i> |
| POLLE233619 | <i>Bombus</i> | <i>Bombus lapidarius</i> |
| POLLE233919 | <i>Bombus</i> | <i>Bombus lapidarius</i> |
| POLLE235219 | <i>Bombus</i> | <i>Bombus lapidarius</i> |
| POLLE235519 | <i>Bombus</i> | <i>Bombus lapidarius</i> |
| POLLE235719 | <i>Bombus</i> | <i>Bombus lapidarius</i> |
| POLLE236719 | <i>Bombus</i> | <i>Bombus lapidarius</i> |
| POLLE236819 | <i>Bombus</i> | <i>Bombus lapidarius</i> |
| POLLE236919 | <i>Bombus</i> | <i>Bombus lapidarius</i> |
| POLLE244219 | <i>Bombus</i> | <i>Bombus lapidarius</i> |
| POLLE244819 | <i>Bombus</i> | <i>Bombus lapidarius</i> |
| POLLE246919 | <i>Bombus</i> | <i>Bombus lapidarius</i> |
| POLLE247119 | <i>Bombus</i> | <i>Bombus lapidarius</i> |
| POLLE248019 | <i>Bombus</i> | <i>Bombus lapidarius</i> |
| POLLE266619 | <i>Bombus</i> | <i>Bombus lapidarius</i> |
| POLLE266719 | <i>Bombus</i> | <i>Bombus lapidarius</i> |
| POLLE266819 | <i>Bombus</i> | <i>Bombus lapidarius</i> |
| POLLE269219 | <i>Bombus</i> | <i>Bombus lapidarius</i> |
| POLLE273319 | <i>Bombus</i> | <i>Bombus lapidarius</i> |
| POLLE275219 | <i>Bombus</i> | <i>Bombus lapidarius</i> |
| POLLE286519 | <i>Bombus</i> | <i>Bombus lapidarius</i> |
| POLLE291819 | <i>Bombus</i> | <i>Bombus lapidarius</i> |
| POLLE335319 | <i>Bombus</i> | <i>Bombus lapidarius</i> |
| POLLE350319 | <i>Bombus</i> | <i>Bombus lapidarius</i> |
| POLLE39919  | <i>Bombus</i> | <i>Bombus lapidarius</i> |
| POLLE99219  | <i>Bombus</i> | <i>Bombus lapidarius</i> |
| BBHYL26310  | <i>Bombus</i> | <i>Bombus sylvicola</i>  |
| BEECA04206  | <i>Bombus</i> | <i>Bombus lapponicus</i> |
| BEECA29606  | <i>Bombus</i> | <i>Bombus lapponicus</i> |
| BEECA29706  | <i>Bombus</i> | <i>Bombus lapponicus</i> |
| BEECA35706  | <i>Bombus</i> | <i>Bombus lapponicus</i> |
| BEECA35806  | <i>Bombus</i> | <i>Bombus lapponicus</i> |
| BEECA35906  | <i>Bombus</i> | <i>Bombus lapponicus</i> |
| CHUBE00106  | <i>Bombus</i> | <i>Bombus lapponicus</i> |
| CHUBE00406  | <i>Bombus</i> | <i>Bombus lapponicus</i> |
| CHUBE00606  | <i>Bombus</i> | <i>Bombus lapponicus</i> |
| CHUBE00906  | <i>Bombus</i> | <i>Bombus lapponicus</i> |
| CHUBE01206  | <i>Bombus</i> | <i>Bombus lapponicus</i> |
| CHUBE01706  | <i>Bombus</i> | <i>Bombus lapponicus</i> |

|              |               |                          |
|--------------|---------------|--------------------------|
| CHUBE01806   | <i>Bombus</i> | <i>Bombus lapponicus</i> |
| CHUBE02406   | <i>Bombus</i> | <i>Bombus lapponicus</i> |
| CNIVE01914   | <i>Bombus</i> | <i>Bombus sylvicola</i>  |
| CNIVF00614   | <i>Bombus</i> | <i>Bombus sylvicola</i>  |
| CNTGB00815   | <i>Bombus</i> | <i>Bombus sylvicola</i>  |
| CNTGB00915   | <i>Bombus</i> | <i>Bombus sylvicola</i>  |
| CNTGC01915   | <i>Bombus</i> | <i>Bombus sylvicola</i>  |
| CNTGC02015   | <i>Bombus</i> | <i>Bombus sylvicola</i>  |
| CNTGC02115   | <i>Bombus</i> | <i>Bombus sylvicola</i>  |
| CNTGC02315   | <i>Bombus</i> | <i>Bombus sylvicola</i>  |
| CNTGC02415   | <i>Bombus</i> | <i>Bombus sylvicola</i>  |
| CNTGC02615   | <i>Bombus</i> | <i>Bombus sylvicola</i>  |
| CNTGC02715   | <i>Bombus</i> | <i>Bombus sylvicola</i>  |
| CNTGC02815   | <i>Bombus</i> | <i>Bombus sylvicola</i>  |
| CNTGC02915   | <i>Bombus</i> | <i>Bombus sylvicola</i>  |
| CNTGC03015   | <i>Bombus</i> | <i>Bombus sylvicola</i>  |
| CNTGD01415   | <i>Bombus</i> | <i>Bombus sylvicola</i>  |
| CNTGD01515   | <i>Bombus</i> | <i>Bombus sylvicola</i>  |
| CNTGD01615   | <i>Bombus</i> | <i>Bombus sylvicola</i>  |
| CNTGD01715   | <i>Bombus</i> | <i>Bombus sylvicola</i>  |
| CNTGD01815   | <i>Bombus</i> | <i>Bombus sylvicola</i>  |
| CNTGD01915   | <i>Bombus</i> | <i>Bombus sylvicola</i>  |
| CNTGD02015   | <i>Bombus</i> | <i>Bombus sylvicola</i>  |
| CNTGD02115   | <i>Bombus</i> | <i>Bombus sylvicola</i>  |
| CNTGD02215   | <i>Bombus</i> | <i>Bombus sylvicola</i>  |
| CNTGE00215   | <i>Bombus</i> | <i>Bombus sylvicola</i>  |
| CNTGF01515   | <i>Bombus</i> | <i>Bombus sylvicola</i>  |
| CNTGF01615   | <i>Bombus</i> | <i>Bombus sylvicola</i>  |
| CNTMC227814  | <i>Bombus</i> | <i>Bombus sylvicola</i>  |
| CNWAB127414  | <i>Bombus</i> | <i>Bombus sylvicola</i>  |
| DSCNI00207   | <i>Bombus</i> | <i>Bombus lapponicus</i> |
| GBAH036306   | <i>Bombus</i> | <i>Bombus lapponicus</i> |
| GBAH1700919  | <i>Bombus</i> | <i>Bombus lapponicus</i> |
| GBAH1742019  | <i>Bombus</i> | <i>Bombus lapponicus</i> |
| GBAH1742119  | <i>Bombus</i> | <i>Bombus lapponicus</i> |
| GBHAP75614   | <i>Bombus</i> | <i>Bombus lapponicus</i> |
| GBHAP75714   | <i>Bombus</i> | <i>Bombus lapponicus</i> |
| GBHAP75814   | <i>Bombus</i> | <i>Bombus lapponicus</i> |
| GBHAP75914   | <i>Bombus</i> | <i>Bombus lapponicus</i> |
| GBHAP76014   | <i>Bombus</i> | <i>Bombus lapponicus</i> |
| GBHAP76114   | <i>Bombus</i> | <i>Bombus lapponicus</i> |
| GBHAP76214   | <i>Bombus</i> | <i>Bombus lapponicus</i> |
| GBHAP76314   | <i>Bombus</i> | <i>Bombus lapponicus</i> |
| GBMIN7276217 | <i>Bombus</i> | <i>Bombus sylvicola</i>  |
| GBMNB6225620 | <i>Bombus</i> | <i>Bombus sylvicola</i>  |
| HARC17010    | <i>Bombus</i> | <i>Bombus sylvicola</i>  |

|             |               |                          |
|-------------|---------------|--------------------------|
| HMBCH00207  | <i>Bombus</i> | <i>Bombus lapponicus</i> |
| HMBCH00607  | <i>Bombus</i> | <i>Bombus lapponicus</i> |
| HMBCH00907  | <i>Bombus</i> | <i>Bombus lapponicus</i> |
| HMBCH01007  | <i>Bombus</i> | <i>Bombus lapponicus</i> |
| HMBCH01107  | <i>Bombus</i> | <i>Bombus lapponicus</i> |
| HMBCH04007  | <i>Bombus</i> | <i>Bombus lapponicus</i> |
| HMBCH04607  | <i>Bombus</i> | <i>Bombus lapponicus</i> |
| HMBCH04807  | <i>Bombus</i> | <i>Bombus lapponicus</i> |
| HMBCH04907  | <i>Bombus</i> | <i>Bombus lapponicus</i> |
| HMBCH05007  | <i>Bombus</i> | <i>Bombus lapponicus</i> |
| HMBCH05107  | <i>Bombus</i> | <i>Bombus lapponicus</i> |
| HMBCH05307  | <i>Bombus</i> | <i>Bombus lapponicus</i> |
| HMBCH05407  | <i>Bombus</i> | <i>Bombus lapponicus</i> |
| HMBCH06907  | <i>Bombus</i> | <i>Bombus lapponicus</i> |
| JSYKA16810  | <i>Bombus</i> | <i>Bombus sylvicola</i>  |
| JSYKA17610  | <i>Bombus</i> | <i>Bombus sylvicola</i>  |
| JSYKA17910  | <i>Bombus</i> | <i>Bombus sylvicola</i>  |
| KNWRA05712  | <i>Bombus</i> | <i>Bombus sylvicola</i>  |
| MHBEE02707  | <i>Bombus</i> | <i>Bombus lapponicus</i> |
| MHBEE03707  | <i>Bombus</i> | <i>Bombus lapponicus</i> |
| MHBEE03807  | <i>Bombus</i> | <i>Bombus lapponicus</i> |
| MHBEE04407  | <i>Bombus</i> | <i>Bombus lapponicus</i> |
| MHBEE04507  | <i>Bombus</i> | <i>Bombus lapponicus</i> |
| MHBEE05107  | <i>Bombus</i> | <i>Bombus lapponicus</i> |
| MHBEE05207  | <i>Bombus</i> | <i>Bombus lapponicus</i> |
| MHBEE05307  | <i>Bombus</i> | <i>Bombus lapponicus</i> |
| MHBEE07107  | <i>Bombus</i> | <i>Bombus lapponicus</i> |
| MHBEE07207  | <i>Bombus</i> | <i>Bombus lapponicus</i> |
| MHBEE07407  | <i>Bombus</i> | <i>Bombus lapponicus</i> |
| MHBEE07507  | <i>Bombus</i> | <i>Bombus lapponicus</i> |
| MHBEE07607  | <i>Bombus</i> | <i>Bombus lapponicus</i> |
| MHBEE07807  | <i>Bombus</i> | <i>Bombus lapponicus</i> |
| MHBEE08307  | <i>Bombus</i> | <i>Bombus lapponicus</i> |
| MHBEE08407  | <i>Bombus</i> | <i>Bombus lapponicus</i> |
| MHBEE08707  | <i>Bombus</i> | <i>Bombus lapponicus</i> |
| MHBEE09007  | <i>Bombus</i> | <i>Bombus lapponicus</i> |
| MHBEE09207  | <i>Bombus</i> | <i>Bombus lapponicus</i> |
| MHBEE09407  | <i>Bombus</i> | <i>Bombus lapponicus</i> |
| MOBIL109815 | <i>Bombus</i> | <i>Bombus sylvicola</i>  |
| MOBIL119916 | <i>Bombus</i> | <i>Bombus sylvicola</i>  |
| SAPIT06008  | <i>Bombus</i> | <i>Bombus sylvicola</i>  |
| SSDWA340115 | <i>Bombus</i> | <i>Bombus sylvicola</i>  |
| SSDWA479015 | <i>Bombus</i> | <i>Bombus sylvicola</i>  |
| SSWLB360913 | <i>Bombus</i> | <i>Bombus sylvicola</i>  |
| TTHYW37208  | <i>Bombus</i> | <i>Bombus sylvicola</i>  |
| TTHYW96508  | <i>Bombus</i> | <i>Bombus sylvicola</i>  |

|              |               |                           |
|--------------|---------------|---------------------------|
| TTHYW96708   | <i>Bombus</i> | <i>Bombus sylvicola</i>   |
| TTHYW96908   | <i>Bombus</i> | <i>Bombus sylvicola</i>   |
| UAMIC75713   | <i>Bombus</i> | <i>Bombus sylvicola</i>   |
| UAMIC75813   | <i>Bombus</i> | <i>Bombus sylvicola</i>   |
| GBMIN7204417 | <i>Bombus</i> | <i>Bombus lepidus</i>     |
| BBBO20710    | <i>Bombus</i> | <i>Bombus longipennis</i> |
| BBBO20810    | <i>Bombus</i> | <i>Bombus longipennis</i> |
| BBBO20910    | <i>Bombus</i> | <i>Bombus longipennis</i> |
| BBBO21010    | <i>Bombus</i> | <i>Bombus longipennis</i> |
| BBBO21110    | <i>Bombus</i> | <i>Bombus longipennis</i> |
| BBBO21210    | <i>Bombus</i> | <i>Bombus longipennis</i> |
| BBBO24110    | <i>Bombus</i> | <i>Bombus longipennis</i> |
| BBBO24210    | <i>Bombus</i> | <i>Bombus longipennis</i> |
| BBBO24310    | <i>Bombus</i> | <i>Bombus longipennis</i> |
| BBBO24410    | <i>Bombus</i> | <i>Bombus longipennis</i> |
| BBBO24610    | <i>Bombus</i> | <i>Bombus longipennis</i> |
| BBBO24810    | <i>Bombus</i> | <i>Bombus longipennis</i> |
| BBBO33110    | <i>Bombus</i> | <i>Bombus longipennis</i> |
| BBBO39811    | <i>Bombus</i> | <i>Bombus longipennis</i> |
| BBWP18309    | <i>Bombus</i> | <i>Bombus longipennis</i> |
| BBWP18409    | <i>Bombus</i> | <i>Bombus longipennis</i> |
| BBWP45310    | <i>Bombus</i> | <i>Bombus longipennis</i> |
| BBWP45410    | <i>Bombus</i> | <i>Bombus longipennis</i> |
| BBWP45510    | <i>Bombus</i> | <i>Bombus longipennis</i> |
| BBWP45910    | <i>Bombus</i> | <i>Bombus longipennis</i> |
| BBWP50810    | <i>Bombus</i> | <i>Bombus longipennis</i> |
| BBWP51010    | <i>Bombus</i> | <i>Bombus longipennis</i> |
| BBWP51110    | <i>Bombus</i> | <i>Bombus longipennis</i> |
| GBMIN7204517 | <i>Bombus</i> | <i>Bombus longipennis</i> |
| GBAH709610   | <i>Bombus</i> | <i>Bombus longipes</i>    |
| BBBO00610    | <i>Bombus</i> | <i>Bombus lucorum</i>     |
| BBBO00710    | <i>Bombus</i> | <i>Bombus lucorum</i>     |
| BBBO05510    | <i>Bombus</i> | <i>Bombus lucorum</i>     |
| BBBO09910    | <i>Bombus</i> | <i>Bombus lucorum</i>     |
| BBBO10510    | <i>Bombus</i> | <i>Bombus lucorum</i>     |
| BBBO15810    | <i>Bombus</i> | <i>Bombus lucorum</i>     |
| BBBO15910    | <i>Bombus</i> | <i>Bombus lucorum</i>     |
| BBBO16010    | <i>Bombus</i> | <i>Bombus lucorum</i>     |
| BBBO21310    | <i>Bombus</i> | <i>Bombus lucorum</i>     |
| BBBO21410    | <i>Bombus</i> | <i>Bombus lucorum</i>     |
| BBBO21510    | <i>Bombus</i> | <i>Bombus lucorum</i>     |
| BBBO21610    | <i>Bombus</i> | <i>Bombus lucorum</i>     |
| BBBO21710    | <i>Bombus</i> | <i>Bombus lucorum</i>     |
| BBBO21810    | <i>Bombus</i> | <i>Bombus lucorum</i>     |
| BBBO21910    | <i>Bombus</i> | <i>Bombus lucorum</i>     |
| BBBO22010    | <i>Bombus</i> | <i>Bombus lucorum</i>     |

|            |               |                       |
|------------|---------------|-----------------------|
| BBBO22110  | <i>Bombus</i> | <i>Bombus lucorum</i> |
| BBBO22210  | <i>Bombus</i> | <i>Bombus lucorum</i> |
| BBBO24510  | <i>Bombus</i> | <i>Bombus lucorum</i> |
| BBBO24910  | <i>Bombus</i> | <i>Bombus lucorum</i> |
| BBBO30910  | <i>Bombus</i> | <i>Bombus lucorum</i> |
| BBBO33410  | <i>Bombus</i> | <i>Bombus lucorum</i> |
| BBBO34110  | <i>Bombus</i> | <i>Bombus lucorum</i> |
| BBBO34210  | <i>Bombus</i> | <i>Bombus lucorum</i> |
| BBBO34310  | <i>Bombus</i> | <i>Bombus lucorum</i> |
| BBBO34510  | <i>Bombus</i> | <i>Bombus lucorum</i> |
| BBBO34610  | <i>Bombus</i> | <i>Bombus lucorum</i> |
| BBBO34710  | <i>Bombus</i> | <i>Bombus lucorum</i> |
| BBBO34810  | <i>Bombus</i> | <i>Bombus lucorum</i> |
| BBBO35010  | <i>Bombus</i> | <i>Bombus lucorum</i> |
| BBBO35110  | <i>Bombus</i> | <i>Bombus lucorum</i> |
| BBBO35210  | <i>Bombus</i> | <i>Bombus lucorum</i> |
| BBBO35310  | <i>Bombus</i> | <i>Bombus lucorum</i> |
| BBBO35410  | <i>Bombus</i> | <i>Bombus lucorum</i> |
| BBBO35510  | <i>Bombus</i> | <i>Bombus lucorum</i> |
| BBBO35610  | <i>Bombus</i> | <i>Bombus lucorum</i> |
| BBBO35710  | <i>Bombus</i> | <i>Bombus lucorum</i> |
| BBBO38511  | <i>Bombus</i> | <i>Bombus lucorum</i> |
| BBBO38611  | <i>Bombus</i> | <i>Bombus lucorum</i> |
| BBBO38711  | <i>Bombus</i> | <i>Bombus lucorum</i> |
| BBBO38811  | <i>Bombus</i> | <i>Bombus lucorum</i> |
| BBBO38911  | <i>Bombus</i> | <i>Bombus lucorum</i> |
| BBBO43611  | <i>Bombus</i> | <i>Bombus lucorum</i> |
| BBBO43711  | <i>Bombus</i> | <i>Bombus lucorum</i> |
| BBBO45611  | <i>Bombus</i> | <i>Bombus lucorum</i> |
| BBBO45711  | <i>Bombus</i> | <i>Bombus lucorum</i> |
| BBBO45811  | <i>Bombus</i> | <i>Bombus lucorum</i> |
| BBBO45911  | <i>Bombus</i> | <i>Bombus lucorum</i> |
| BBBO46011  | <i>Bombus</i> | <i>Bombus lucorum</i> |
| BBBO46111  | <i>Bombus</i> | <i>Bombus lucorum</i> |
| BBBO46211  | <i>Bombus</i> | <i>Bombus lucorum</i> |
| BBBO46311  | <i>Bombus</i> | <i>Bombus lucorum</i> |
| BBBO46411  | <i>Bombus</i> | <i>Bombus lucorum</i> |
| BBBO47011  | <i>Bombus</i> | <i>Bombus lucorum</i> |
| BBBO47111  | <i>Bombus</i> | <i>Bombus lucorum</i> |
| BBBO47411  | <i>Bombus</i> | <i>Bombus lucorum</i> |
| BBWP35209  | <i>Bombus</i> | <i>Bombus lucorum</i> |
| BBWP35309  | <i>Bombus</i> | <i>Bombus lucorum</i> |
| BEEEE21915 | <i>Bombus</i> | <i>Bombus lucorum</i> |
| BEEEE23415 | <i>Bombus</i> | <i>Bombus lucorum</i> |
| BEEEE28416 | <i>Bombus</i> | <i>Bombus lucorum</i> |
| FBHAP80009 | <i>Bombus</i> | <i>Bombus lucorum</i> |

|              |               |                       |
|--------------|---------------|-----------------------|
| FBHAP80109   | <i>Bombus</i> | <i>Bombus lucorum</i> |
| FBHAP80209   | <i>Bombus</i> | <i>Bombus lucorum</i> |
| GBAH031606   | <i>Bombus</i> | <i>Bombus lucorum</i> |
| GBAH068106   | <i>Bombus</i> | <i>Bombus lucorum</i> |
| GBAH068206   | <i>Bombus</i> | <i>Bombus lucorum</i> |
| GBAH068306   | <i>Bombus</i> | <i>Bombus lucorum</i> |
| GBAH068406   | <i>Bombus</i> | <i>Bombus lucorum</i> |
| GBAH068506   | <i>Bombus</i> | <i>Bombus lucorum</i> |
| GBAH138106   | <i>Bombus</i> | <i>Bombus lucorum</i> |
| GBAH138206   | <i>Bombus</i> | <i>Bombus lucorum</i> |
| GBAH1648219  | <i>Bombus</i> | <i>Bombus lucorum</i> |
| GBAH1741519  | <i>Bombus</i> | <i>Bombus lucorum</i> |
| GBAH1773919  | <i>Bombus</i> | <i>Bombus lucorum</i> |
| GBAH1834319  | <i>Bombus</i> | <i>Bombus lucorum</i> |
| GBAH1834419  | <i>Bombus</i> | <i>Bombus lucorum</i> |
| GBAH1834519  | <i>Bombus</i> | <i>Bombus lucorum</i> |
| GBAH1834619  | <i>Bombus</i> | <i>Bombus lucorum</i> |
| GBAH1834719  | <i>Bombus</i> | <i>Bombus lucorum</i> |
| GBAH1834819  | <i>Bombus</i> | <i>Bombus lucorum</i> |
| GBAH1834919  | <i>Bombus</i> | <i>Bombus lucorum</i> |
| GBAH387608   | <i>Bombus</i> | <i>Bombus lucorum</i> |
| GBCHA58913   | <i>Bombus</i> | <i>Bombus lucorum</i> |
| GBHAP139115  | <i>Bombus</i> | <i>Bombus lucorum</i> |
| GBHAP139215  | <i>Bombus</i> | <i>Bombus lucorum</i> |
| GBHAP139315  | <i>Bombus</i> | <i>Bombus lucorum</i> |
| GBHAP139415  | <i>Bombus</i> | <i>Bombus lucorum</i> |
| GBHAP139515  | <i>Bombus</i> | <i>Bombus lucorum</i> |
| GBHAP139615  | <i>Bombus</i> | <i>Bombus lucorum</i> |
| GBHAP139715  | <i>Bombus</i> | <i>Bombus lucorum</i> |
| GBHAP139815  | <i>Bombus</i> | <i>Bombus lucorum</i> |
| GBHAP139915  | <i>Bombus</i> | <i>Bombus lucorum</i> |
| GBHAP140015  | <i>Bombus</i> | <i>Bombus lucorum</i> |
| GBHAP140115  | <i>Bombus</i> | <i>Bombus lucorum</i> |
| GBHAP140215  | <i>Bombus</i> | <i>Bombus lucorum</i> |
| GBHAP140315  | <i>Bombus</i> | <i>Bombus lucorum</i> |
| GBHAP140415  | <i>Bombus</i> | <i>Bombus lucorum</i> |
| GBHAP140515  | <i>Bombus</i> | <i>Bombus lucorum</i> |
| GBHAP140615  | <i>Bombus</i> | <i>Bombus lucorum</i> |
| GBHAP140715  | <i>Bombus</i> | <i>Bombus lucorum</i> |
| GBMIN7204617 | <i>Bombus</i> | <i>Bombus lucorum</i> |
| GBMIN7204717 | <i>Bombus</i> | <i>Bombus lucorum</i> |
| GBMIN7204817 | <i>Bombus</i> | <i>Bombus lucorum</i> |
| GBMIN7204917 | <i>Bombus</i> | <i>Bombus lucorum</i> |
| GBMNB6226520 | <i>Bombus</i> | <i>Bombus lucorum</i> |
| GMGMA53914   | <i>Bombus</i> | <i>Bombus lucorum</i> |
| GMGMA54614   | <i>Bombus</i> | <i>Bombus lucorum</i> |

|             |               |                       |
|-------------|---------------|-----------------------|
| GMGMB51614  | <i>Bombus</i> | <i>Bombus lucorum</i> |
| GMGMC14014  | <i>Bombus</i> | <i>Bombus lucorum</i> |
| GMGMC14114  | <i>Bombus</i> | <i>Bombus lucorum</i> |
| GMGMC14514  | <i>Bombus</i> | <i>Bombus lucorum</i> |
| GMGMC15214  | <i>Bombus</i> | <i>Bombus lucorum</i> |
| GMGMC16214  | <i>Bombus</i> | <i>Bombus lucorum</i> |
| GMGMC19614  | <i>Bombus</i> | <i>Bombus lucorum</i> |
| GMGMC21214  | <i>Bombus</i> | <i>Bombus lucorum</i> |
| GMGMD15914  | <i>Bombus</i> | <i>Bombus lucorum</i> |
| GMGME11114  | <i>Bombus</i> | <i>Bombus lucorum</i> |
| GMGMH145414 | <i>Bombus</i> | <i>Bombus lucorum</i> |
| GMGMH145514 | <i>Bombus</i> | <i>Bombus lucorum</i> |
| GMGMI05114  | <i>Bombus</i> | <i>Bombus lucorum</i> |
| GMGMJ07714  | <i>Bombus</i> | <i>Bombus lucorum</i> |
| GMGMJ08914  | <i>Bombus</i> | <i>Bombus lucorum</i> |
| GMGMJ09714  | <i>Bombus</i> | <i>Bombus lucorum</i> |
| GMGMK08814  | <i>Bombus</i> | <i>Bombus lucorum</i> |
| GMGMK09014  | <i>Bombus</i> | <i>Bombus lucorum</i> |
| GMGMK10414  | <i>Bombus</i> | <i>Bombus lucorum</i> |
| GMGMK10814  | <i>Bombus</i> | <i>Bombus lucorum</i> |
| GMGML10414  | <i>Bombus</i> | <i>Bombus lucorum</i> |
| GMGML10814  | <i>Bombus</i> | <i>Bombus lucorum</i> |
| GMGML15214  | <i>Bombus</i> | <i>Bombus lucorum</i> |
| GMGMM10914  | <i>Bombus</i> | <i>Bombus lucorum</i> |
| GMGMM11214  | <i>Bombus</i> | <i>Bombus lucorum</i> |
| GMGMM11414  | <i>Bombus</i> | <i>Bombus lucorum</i> |
| GMGMM13414  | <i>Bombus</i> | <i>Bombus lucorum</i> |
| GMGMM13914  | <i>Bombus</i> | <i>Bombus lucorum</i> |
| GMGMM14714  | <i>Bombus</i> | <i>Bombus lucorum</i> |
| GMGMM16114  | <i>Bombus</i> | <i>Bombus lucorum</i> |
| GMGMM19114  | <i>Bombus</i> | <i>Bombus lucorum</i> |
| GMGMN00314  | <i>Bombus</i> | <i>Bombus lucorum</i> |
| GMGMN00414  | <i>Bombus</i> | <i>Bombus lucorum</i> |
| GMGMN00514  | <i>Bombus</i> | <i>Bombus lucorum</i> |
| GMGMN00614  | <i>Bombus</i> | <i>Bombus lucorum</i> |
| GMGMN00814  | <i>Bombus</i> | <i>Bombus lucorum</i> |
| GMGMN00914  | <i>Bombus</i> | <i>Bombus lucorum</i> |
| GMGMN01314  | <i>Bombus</i> | <i>Bombus lucorum</i> |
| GMGMN01614  | <i>Bombus</i> | <i>Bombus lucorum</i> |
| GMGMN02614  | <i>Bombus</i> | <i>Bombus lucorum</i> |
| GMGMN02714  | <i>Bombus</i> | <i>Bombus lucorum</i> |
| GMGMN03014  | <i>Bombus</i> | <i>Bombus lucorum</i> |
| GMGMN03514  | <i>Bombus</i> | <i>Bombus lucorum</i> |
| GMGMN03614  | <i>Bombus</i> | <i>Bombus lucorum</i> |
| GMGMN04214  | <i>Bombus</i> | <i>Bombus lucorum</i> |
| GMGMN04414  | <i>Bombus</i> | <i>Bombus lucorum</i> |



|              |               |                          |
|--------------|---------------|--------------------------|
| GMGMN04514   | <i>Bombus</i> | <i>Bombus lucorum</i>    |
| GMGMN14714   | <i>Bombus</i> | <i>Bombus lucorum</i>    |
| GMGMN15014   | <i>Bombus</i> | <i>Bombus lucorum</i>    |
| GMGMN15314   | <i>Bombus</i> | <i>Bombus lucorum</i>    |
| GMGMN16614   | <i>Bombus</i> | <i>Bombus lucorum</i>    |
| GMGMN19314   | <i>Bombus</i> | <i>Bombus lucorum</i>    |
| GMGMN19414   | <i>Bombus</i> | <i>Bombus lucorum</i>    |
| GMGRB135213  | <i>Bombus</i> | <i>Bombus lucorum</i>    |
| GMGRB135513  | <i>Bombus</i> | <i>Bombus lucorum</i>    |
| GMGRC305713  | <i>Bombus</i> | <i>Bombus lucorum</i>    |
| GMGRD361213  | <i>Bombus</i> | <i>Bombus lucorum</i>    |
| GMGRD361813  | <i>Bombus</i> | <i>Bombus lucorum</i>    |
| JCLUC05011   | <i>Bombus</i> | <i>Bombus lucorum</i>    |
| JCLUC05111   | <i>Bombus</i> | <i>Bombus lucorum</i>    |
| JCLUC05211   | <i>Bombus</i> | <i>Bombus lucorum</i>    |
| JCLUC05311   | <i>Bombus</i> | <i>Bombus lucorum</i>    |
| JCLUC05411   | <i>Bombus</i> | <i>Bombus lucorum</i>    |
| JCLUC05511   | <i>Bombus</i> | <i>Bombus lucorum</i>    |
| JCLUC05611   | <i>Bombus</i> | <i>Bombus lucorum</i>    |
| JCLUC05711   | <i>Bombus</i> | <i>Bombus lucorum</i>    |
| JCLUC05811   | <i>Bombus</i> | <i>Bombus lucorum</i>    |
| JCLUC05911   | <i>Bombus</i> | <i>Bombus lucorum</i>    |
| JCLUC06011   | <i>Bombus</i> | <i>Bombus lucorum</i>    |
| JCLUC06111   | <i>Bombus</i> | <i>Bombus lucorum</i>    |
| JCLUC06211   | <i>Bombus</i> | <i>Bombus lucorum</i>    |
| JCLUC06311   | <i>Bombus</i> | <i>Bombus lucorum</i>    |
| JCLUC06411   | <i>Bombus</i> | <i>Bombus lucorum</i>    |
| JCLUC06511   | <i>Bombus</i> | <i>Bombus lucorum</i>    |
| JCLUC06611   | <i>Bombus</i> | <i>Bombus lucorum</i>    |
| JCLUC06711   | <i>Bombus</i> | <i>Bombus lucorum</i>    |
| POLLE137819  | <i>Bombus</i> | <i>Bombus lucorum</i>    |
| POLLE153519  | <i>Bombus</i> | <i>Bombus lucorum</i>    |
| POLLE292619  | <i>Bombus</i> | <i>Bombus lucorum</i>    |
| POLLE86619   | <i>Bombus</i> | <i>Bombus lucorum</i>    |
| GBMNB6298920 | <i>Bombus</i> | <i>Bombus macgregori</i> |
| GBMNB6299020 | <i>Bombus</i> | <i>Bombus macgregori</i> |
| BBBO15110    | <i>Bombus</i> | <i>Bombus magnus</i>     |
| BBBO18510    | <i>Bombus</i> | <i>Bombus magnus</i>     |
| BBBO20510    | <i>Bombus</i> | <i>Bombus magnus</i>     |
| BBBO20610    | <i>Bombus</i> | <i>Bombus magnus</i>     |
| BBBO33010    | <i>Bombus</i> | <i>Bombus magnus</i>     |
| BBBO44911    | <i>Bombus</i> | <i>Bombus magnus</i>     |
| BEEEE30016   | <i>Bombus</i> | <i>Bombus magnus</i>     |
| BEEEE33416   | <i>Bombus</i> | <i>Bombus magnus</i>     |
| FBHAP80309   | <i>Bombus</i> | <i>Bombus magnus</i>     |
| GBAH068706   | <i>Bombus</i> | <i>Bombus magnus</i>     |

|              |               |                           |                             |
|--------------|---------------|---------------------------|-----------------------------|
| GBAH068806   | <i>Bombus</i> | <i>Bombus magnus</i>      |                             |
| GBAH138606   | <i>Bombus</i> | <i>Bombus magnus</i>      |                             |
| GBAH138706   | <i>Bombus</i> | <i>Bombus magnus</i>      |                             |
| JCLUC02311   | <i>Bombus</i> | <i>Bombus magnus</i>      |                             |
| JCLUC02411   | <i>Bombus</i> | <i>Bombus magnus</i>      |                             |
| JCLUC02511   | <i>Bombus</i> | <i>Bombus magnus</i>      |                             |
| JCLUC02611   | <i>Bombus</i> | <i>Bombus magnus</i>      |                             |
| JCLUC02711   | <i>Bombus</i> | <i>Bombus magnus</i>      |                             |
| JCLUC02811   | <i>Bombus</i> | <i>Bombus magnus</i>      |                             |
| JCLUC02911   | <i>Bombus</i> | <i>Bombus magnus</i>      |                             |
| JCLUC03011   | <i>Bombus</i> | <i>Bombus magnus</i>      |                             |
| JCLUC03111   | <i>Bombus</i> | <i>Bombus magnus</i>      |                             |
| JCLUC03211   | <i>Bombus</i> | <i>Bombus magnus</i>      |                             |
| JCLUC03311   | <i>Bombus</i> | <i>Bombus magnus</i>      |                             |
| JCLUC03411   | <i>Bombus</i> | <i>Bombus magnus</i>      |                             |
| JCLUC03511   | <i>Bombus</i> | <i>Bombus magnus</i>      |                             |
| JCLUC03611   | <i>Bombus</i> | <i>Bombus magnus</i>      |                             |
| JCLUC03711   | <i>Bombus</i> | <i>Bombus magnus</i>      |                             |
| JCLUC03811   | <i>Bombus</i> | <i>Bombus magnus</i>      |                             |
| JCLUC03911   | <i>Bombus</i> | <i>Bombus magnus</i>      |                             |
| JCLUC04011   | <i>Bombus</i> | <i>Bombus magnus</i>      |                             |
| JCLUC04111   | <i>Bombus</i> | <i>Bombus magnus</i>      |                             |
| JCLUC04211   | <i>Bombus</i> | <i>Bombus magnus</i>      |                             |
| JCLUC04311   | <i>Bombus</i> | <i>Bombus magnus</i>      |                             |
| JCLUC04411   | <i>Bombus</i> | <i>Bombus magnus</i>      |                             |
| JCLUC04511   | <i>Bombus</i> | <i>Bombus magnus</i>      |                             |
| JCLUC04611   | <i>Bombus</i> | <i>Bombus magnus</i>      |                             |
| JCLUC04711   | <i>Bombus</i> | <i>Bombus magnus</i>      |                             |
| JCLUC04811   | <i>Bombus</i> | <i>Bombus magnus</i>      |                             |
| JCLUC04911   | <i>Bombus</i> | <i>Bombus magnus</i>      |                             |
| GBAH1317319  | <i>Bombus</i> | <i>Bombus medius</i>      |                             |
| GBAH1317419  | <i>Bombus</i> | <i>Bombus medius</i>      |                             |
| GBHAP75514   | <i>Bombus</i> | <i>Bombus medius</i>      |                             |
| GBMNB6118720 | <i>Bombus</i> | <i>Bombus medius</i>      |                             |
| GBMNB6118820 | <i>Bombus</i> | <i>Bombus medius</i>      |                             |
| GBMNB6120220 | <i>Bombus</i> | <i>Bombus medius</i>      |                             |
| ASINH05012   | <i>Bombus</i> | <i>Bombus melaleucus</i>  | <i>Bombus volucelloides</i> |
| ASINH05212   | <i>Bombus</i> | <i>Bombus melaleucus</i>  | <i>Bombus volucelloides</i> |
| BBHYB02812   | <i>Bombus</i> | <i>Bombus melanopygus</i> |                             |
| BBHYL22310   | <i>Bombus</i> | <i>Bombus melanopygus</i> |                             |
| BBHYL22510   | <i>Bombus</i> | <i>Bombus melanopygus</i> |                             |
| BBHYL22610   | <i>Bombus</i> | <i>Bombus melanopygus</i> |                             |
| BBHYL22710   | <i>Bombus</i> | <i>Bombus melanopygus</i> |                             |
| BBHYL23010   | <i>Bombus</i> | <i>Bombus melanopygus</i> |                             |
| BEECA28006   | <i>Bombus</i> | <i>Bombus melanopygus</i> |                             |
| BEECA39706   | <i>Bombus</i> | <i>Bombus melanopygus</i> |                             |

|              |               |                           |
|--------------|---------------|---------------------------|
| BEECA39906   | <i>Bombus</i> | <i>Bombus melanopygus</i> |
| BEECA40106   | <i>Bombus</i> | <i>Bombus melanopygus</i> |
| BEECA40206   | <i>Bombus</i> | <i>Bombus melanopygus</i> |
| BEECA41306   | <i>Bombus</i> | <i>Bombus melanopygus</i> |
| BEECB41807   | <i>Bombus</i> | <i>Bombus melanopygus</i> |
| BEECB41907   | <i>Bombus</i> | <i>Bombus melanopygus</i> |
| BMAPH14715   | <i>Bombus</i> | <i>Bombus melanopygus</i> |
| BMAPH18515   | <i>Bombus</i> | <i>Bombus melanopygus</i> |
| CNEIA224012  | <i>Bombus</i> | <i>Bombus melanopygus</i> |
| CNGCA47315   | <i>Bombus</i> | <i>Bombus melanopygus</i> |
| CNGUA66214   | <i>Bombus</i> | <i>Bombus melanopygus</i> |
| CNGUB10914   | <i>Bombus</i> | <i>Bombus melanopygus</i> |
| CNKLA51514   | <i>Bombus</i> | <i>Bombus melanopygus</i> |
| CNWLE246612  | <i>Bombus</i> | <i>Bombus melanopygus</i> |
| GBMNB6299120 | <i>Bombus</i> | <i>Bombus melanopygus</i> |
| SMTPM522915  | <i>Bombus</i> | <i>Bombus melanopygus</i> |
| SMTPM523015  | <i>Bombus</i> | <i>Bombus melanopygus</i> |
| SMTPM637815  | <i>Bombus</i> | <i>Bombus melanopygus</i> |
| SMTPM637915  | <i>Bombus</i> | <i>Bombus melanopygus</i> |
| SMTPM665815  | <i>Bombus</i> | <i>Bombus melanopygus</i> |
| SSJAB15413   | <i>Bombus</i> | <i>Bombus melanopygus</i> |
| SSJAB15513   | <i>Bombus</i> | <i>Bombus melanopygus</i> |
| SSJAF281713  | <i>Bombus</i> | <i>Bombus melanopygus</i> |
| SSKUA100815  | <i>Bombus</i> | <i>Bombus melanopygus</i> |
| SSWLA387113  | <i>Bombus</i> | <i>Bombus melanopygus</i> |
| SSWLA387413  | <i>Bombus</i> | <i>Bombus melanopygus</i> |
| SSWLF03113   | <i>Bombus</i> | <i>Bombus melanopygus</i> |
| TTHYW28108   | <i>Bombus</i> | <i>Bombus melanopygus</i> |
| TTHYW28208   | <i>Bombus</i> | <i>Bombus melanopygus</i> |
| TTHYW30508   | <i>Bombus</i> | <i>Bombus melanopygus</i> |
| TTHYW34008   | <i>Bombus</i> | <i>Bombus melanopygus</i> |
| TTHYW34108   | <i>Bombus</i> | <i>Bombus melanopygus</i> |
| TTHYW47908   | <i>Bombus</i> | <i>Bombus melanopygus</i> |
| TTHYW48408   | <i>Bombus</i> | <i>Bombus melanopygus</i> |
| UAMIC74313   | <i>Bombus</i> | <i>Bombus melanopygus</i> |
| UAMIC74413   | <i>Bombus</i> | <i>Bombus melanopygus</i> |
| ASBEE13208   | <i>Bombus</i> | <i>Bombus melanurus</i>   |
| BBBO32110    | <i>Bombus</i> | <i>Bombus melanurus</i>   |
| BBWP00509    | <i>Bombus</i> | <i>Bombus melanurus</i>   |
| BBWP00709    | <i>Bombus</i> | <i>Bombus melanurus</i>   |
| BBWP00809    | <i>Bombus</i> | <i>Bombus melanurus</i>   |
| BBWP02809    | <i>Bombus</i> | <i>Bombus melanurus</i>   |
| BBWP05709    | <i>Bombus</i> | <i>Bombus melanurus</i>   |
| BBWP05809    | <i>Bombus</i> | <i>Bombus melanurus</i>   |
| BBWP05909    | <i>Bombus</i> | <i>Bombus melanurus</i>   |
| BBWP06309    | <i>Bombus</i> | <i>Bombus melanurus</i>   |

|           |               |                         |
|-----------|---------------|-------------------------|
| BBWP06409 | <i>Bombus</i> | <i>Bombus melanurus</i> |
| BBWP06509 | <i>Bombus</i> | <i>Bombus melanurus</i> |
| BBWP06609 | <i>Bombus</i> | <i>Bombus melanurus</i> |
| BBWP06709 | <i>Bombus</i> | <i>Bombus melanurus</i> |
| BBWP06809 | <i>Bombus</i> | <i>Bombus melanurus</i> |
| BBWP06909 | <i>Bombus</i> | <i>Bombus melanurus</i> |
| BBWP07009 | <i>Bombus</i> | <i>Bombus melanurus</i> |
| BBWP07109 | <i>Bombus</i> | <i>Bombus melanurus</i> |
| BBWP07209 | <i>Bombus</i> | <i>Bombus melanurus</i> |
| BBWP07409 | <i>Bombus</i> | <i>Bombus melanurus</i> |
| BBWP07509 | <i>Bombus</i> | <i>Bombus melanurus</i> |
| BBWP07609 | <i>Bombus</i> | <i>Bombus melanurus</i> |
| BBWP07709 | <i>Bombus</i> | <i>Bombus melanurus</i> |
| BBWP07809 | <i>Bombus</i> | <i>Bombus melanurus</i> |
| BBWP13709 | <i>Bombus</i> | <i>Bombus melanurus</i> |
| BBWP14109 | <i>Bombus</i> | <i>Bombus melanurus</i> |
| BBWP14509 | <i>Bombus</i> | <i>Bombus melanurus</i> |
| BBWP15409 | <i>Bombus</i> | <i>Bombus melanurus</i> |
| BBWP15509 | <i>Bombus</i> | <i>Bombus melanurus</i> |
| BBWP15609 | <i>Bombus</i> | <i>Bombus melanurus</i> |
| BBWP15709 | <i>Bombus</i> | <i>Bombus melanurus</i> |
| BBWP15809 | <i>Bombus</i> | <i>Bombus melanurus</i> |
| BBWP15909 | <i>Bombus</i> | <i>Bombus melanurus</i> |
| BBWP16009 | <i>Bombus</i> | <i>Bombus melanurus</i> |
| BBWP16109 | <i>Bombus</i> | <i>Bombus melanurus</i> |
| BBWP16409 | <i>Bombus</i> | <i>Bombus melanurus</i> |
| BBWP29709 | <i>Bombus</i> | <i>Bombus melanurus</i> |
| BBWP29809 | <i>Bombus</i> | <i>Bombus melanurus</i> |
| BBWP29909 | <i>Bombus</i> | <i>Bombus melanurus</i> |
| BBWP39510 | <i>Bombus</i> | <i>Bombus melanurus</i> |
| BBWP39910 | <i>Bombus</i> | <i>Bombus melanurus</i> |
| BBWP40010 | <i>Bombus</i> | <i>Bombus melanurus</i> |
| BBWP40110 | <i>Bombus</i> | <i>Bombus melanurus</i> |
| BBWP40210 | <i>Bombus</i> | <i>Bombus melanurus</i> |
| BBWP40310 | <i>Bombus</i> | <i>Bombus melanurus</i> |
| BBWP40410 | <i>Bombus</i> | <i>Bombus melanurus</i> |
| BBWP40510 | <i>Bombus</i> | <i>Bombus melanurus</i> |
| BBWP40610 | <i>Bombus</i> | <i>Bombus melanurus</i> |
| BBWP40810 | <i>Bombus</i> | <i>Bombus melanurus</i> |
| BBWP40910 | <i>Bombus</i> | <i>Bombus melanurus</i> |
| BBWP41010 | <i>Bombus</i> | <i>Bombus melanurus</i> |
| BBWP41110 | <i>Bombus</i> | <i>Bombus melanurus</i> |
| BBWP41210 | <i>Bombus</i> | <i>Bombus melanurus</i> |
| BBWP41310 | <i>Bombus</i> | <i>Bombus melanurus</i> |
| BBWP41410 | <i>Bombus</i> | <i>Bombus melanurus</i> |
| BBWP41510 | <i>Bombus</i> | <i>Bombus melanurus</i> |

|              |               |                            |                           |
|--------------|---------------|----------------------------|---------------------------|
| BBWP41610    | <i>Bombus</i> | <i>Bombus melanurus</i>    |                           |
| BBWP41710    | <i>Bombus</i> | <i>Bombus melanurus</i>    |                           |
| BBWP41810    | <i>Bombus</i> | <i>Bombus melanurus</i>    |                           |
| BBWP41910    | <i>Bombus</i> | <i>Bombus melanurus</i>    |                           |
| BBWP42010    | <i>Bombus</i> | <i>Bombus melanurus</i>    |                           |
| GBAH041106   | <i>Bombus</i> | <i>Bombus melanurus</i>    |                           |
| GBAH041206   | <i>Bombus</i> | <i>Bombus melanurus</i>    |                           |
| GBAH1676719  | <i>Bombus</i> | <i>Bombus melanurus</i>    |                           |
| GBMIN7205017 | <i>Bombus</i> | <i>Bombus melanurus</i>    |                           |
| FBHAP80509   | <i>Bombus</i> | <i>Bombus mendax</i>       |                           |
| FBHAP80609   | <i>Bombus</i> | <i>Bombus mendax</i>       |                           |
| FBHAP80709   | <i>Bombus</i> | <i>Bombus mendax</i>       |                           |
| FBSYM28810   | <i>Bombus</i> | <i>Bombus mendax</i>       |                           |
| FBSYM28910   | <i>Bombus</i> | <i>Bombus mendax</i>       |                           |
| GBAH068906   | <i>Bombus</i> | <i>Bombus mendax</i>       |                           |
| GBAH069006   | <i>Bombus</i> | <i>Bombus mendax</i>       |                           |
| BCHYM132213  | <i>Bombus</i> | <i>Bombus mesomelas</i>    |                           |
| FBAPC71211   | <i>Bombus</i> | <i>Bombus mesomelas</i>    |                           |
| FBAPC71311   | <i>Bombus</i> | <i>Bombus mesomelas</i>    |                           |
| FBSYM29010   | <i>Bombus</i> | <i>Bombus mesomelas</i>    |                           |
| FBSYM29110   | <i>Bombus</i> | <i>Bombus mesomelas</i>    |                           |
| FBSYM29210   | <i>Bombus</i> | <i>Bombus mesomelas</i>    |                           |
| FBSYM29310   | <i>Bombus</i> | <i>Bombus mesomelas</i>    |                           |
| GBACU119212  | <i>Bombus</i> | <i>Bombus mesomelas</i>    |                           |
| GBACU119312  | <i>Bombus</i> | <i>Bombus mesomelas</i>    |                           |
| GBACU119412  | <i>Bombus</i> | <i>Bombus mesomelas</i>    |                           |
| GBAH069106   | <i>Bombus</i> | <i>Bombus mesomelas</i>    |                           |
| GBAH069206   | <i>Bombus</i> | <i>Bombus mesomelas</i>    |                           |
| ASINH03512   | <i>Bombus</i> | <i>Bombus mexicanus</i>    |                           |
| BOFWM22408   | <i>Bombus</i> | <i>Bombus mexicanus</i>    | <i>Bombus mexicanorum</i> |
| GBMNB6299220 | <i>Bombus</i> | <i>Bombus mexicanus</i>    |                           |
| GBMNB6299320 | <i>Bombus</i> | <i>Bombus mexicanus</i>    |                           |
| GBMNB6299420 | <i>Bombus</i> | <i>Bombus mexicanus</i>    |                           |
| BBBO01110    | <i>Bombus</i> | <i>Bombus minshanensis</i> |                           |
| BBBO01210    | <i>Bombus</i> | <i>Bombus minshanensis</i> |                           |
| BBBO01710    | <i>Bombus</i> | <i>Bombus minshanensis</i> |                           |
| BBBO01810    | <i>Bombus</i> | <i>Bombus minshanensis</i> |                           |
| BBBO01910    | <i>Bombus</i> | <i>Bombus minshanensis</i> |                           |
| BBBO02010    | <i>Bombus</i> | <i>Bombus minshanensis</i> |                           |
| BBBO02110    | <i>Bombus</i> | <i>Bombus minshanensis</i> |                           |
| BOBO00112    | <i>Bombus</i> | <i>Bombus minshanensis</i> |                           |
| BOBO00212    | <i>Bombus</i> | <i>Bombus minshanensis</i> |                           |
| GBMIN7205117 | <i>Bombus</i> | <i>Bombus minshanensis</i> |                           |
| ASGCB21613   | <i>Bombus</i> | <i>Bombus mixtus</i>       |                           |
| BBHEC14209   | <i>Bombus</i> | <i>Bombus mixtus</i>       |                           |
| BBHEC15109   | <i>Bombus</i> | <i>Bombus mixtus</i>       |                           |

|              |               |                           |
|--------------|---------------|---------------------------|
| BBHEC15409   | <i>Bombus</i> | <i>Bombus mixtus</i>      |
| BBHEC15609   | <i>Bombus</i> | <i>Bombus mixtus</i>      |
| BBHYL21710   | <i>Bombus</i> | <i>Bombus mixtus</i>      |
| BBHYL21910   | <i>Bombus</i> | <i>Bombus mixtus</i>      |
| BBHYL22010   | <i>Bombus</i> | <i>Bombus mixtus</i>      |
| BBHYL22210   | <i>Bombus</i> | <i>Bombus mixtus</i>      |
| BBHYL23510   | <i>Bombus</i> | <i>Bombus mixtus</i>      |
| BBHYL24610   | <i>Bombus</i> | <i>Bombus mixtus</i>      |
| BBHYL26910   | <i>Bombus</i> | <i>Bombus mixtus</i>      |
| BBHYL28310   | <i>Bombus</i> | <i>Bombus mixtus</i>      |
| HMBCH05207   | <i>Bombus</i> | <i>Bombus mixtus</i>      |
| MHBEE03507   | <i>Bombus</i> | <i>Bombus mixtus</i>      |
| TTHYW28008   | <i>Bombus</i> | <i>Bombus mixtus</i>      |
| TTHYW30308   | <i>Bombus</i> | <i>Bombus mixtus</i>      |
| TTHYW30708   | <i>Bombus</i> | <i>Bombus mixtus</i>      |
| TTHYW30808   | <i>Bombus</i> | <i>Bombus mixtus</i>      |
| TTHYW31008   | <i>Bombus</i> | <i>Bombus mixtus</i>      |
| TTHYW37308   | <i>Bombus</i> | <i>Bombus mixtus</i>      |
| TTHYW48908   | <i>Bombus</i> | <i>Bombus mixtus</i>      |
| TTHYW49108   | <i>Bombus</i> | <i>Bombus mixtus</i>      |
| TTHYW49908   | <i>Bombus</i> | <i>Bombus mixtus</i>      |
| TTHYW67708   | <i>Bombus</i> | <i>Bombus mixtus</i>      |
| UAMIC74713   | <i>Bombus</i> | <i>Bombus mixtus</i>      |
| UAMIC74813   | <i>Bombus</i> | <i>Bombus mixtus</i>      |
| ASBEE04308   | <i>Bombus</i> | <i>Bombus modestus</i>    |
| ASBEE13708   | <i>Bombus</i> | <i>Bombus modestus</i>    |
| ASBEE13908   | <i>Bombus</i> | <i>Bombus modestus</i>    |
| ASBEE14008   | <i>Bombus</i> | <i>Bombus modestus</i>    |
| GBAH036406   | <i>Bombus</i> | <i>Bombus modestus</i>    |
| GBAH036506   | <i>Bombus</i> | <i>Bombus modestus</i>    |
| GBAH036606   | <i>Bombus</i> | <i>Bombus modestus</i>    |
| GBMIN7205217 | <i>Bombus</i> | <i>Bombus modestus</i>    |
| ASBEE03908   | <i>Bombus</i> | <i>Bombus mongolensis</i> |
| ASBEE13308   | <i>Bombus</i> | <i>Bombus mongolensis</i> |
| BBWP02309    | <i>Bombus</i> | <i>Bombus mongolensis</i> |
| BBWP06009    | <i>Bombus</i> | <i>Bombus mongolensis</i> |
| BBWP06109    | <i>Bombus</i> | <i>Bombus mongolensis</i> |
| BBWP30109    | <i>Bombus</i> | <i>Bombus mongolensis</i> |
| BBWP30209    | <i>Bombus</i> | <i>Bombus mongolensis</i> |
| BBWP30309    | <i>Bombus</i> | <i>Bombus mongolensis</i> |
| BBWP39210    | <i>Bombus</i> | <i>Bombus mongolensis</i> |
| BBWP39310    | <i>Bombus</i> | <i>Bombus mongolensis</i> |
| BBWP39410    | <i>Bombus</i> | <i>Bombus mongolensis</i> |
| BBWP39610    | <i>Bombus</i> | <i>Bombus mongolensis</i> |
| BBWP39710    | <i>Bombus</i> | <i>Bombus mongolensis</i> |
| BBWP39810    | <i>Bombus</i> | <i>Bombus mongolensis</i> |

|             |               |                         |
|-------------|---------------|-------------------------|
| BEEEE11615  | <i>Bombus</i> | <i>Bombus monticola</i> |
| BEEEE31116  | <i>Bombus</i> | <i>Bombus monticola</i> |
| BEEEE31216  | <i>Bombus</i> | <i>Bombus monticola</i> |
| BEEEE33516  | <i>Bombus</i> | <i>Bombus monticola</i> |
| FBAPC70811  | <i>Bombus</i> | <i>Bombus monticola</i> |
| FBAPC81111  | <i>Bombus</i> | <i>Bombus monticola</i> |
| FBAPD62511  | <i>Bombus</i> | <i>Bombus monticola</i> |
| FBAPD62611  | <i>Bombus</i> | <i>Bombus monticola</i> |
| FBHAP80809  | <i>Bombus</i> | <i>Bombus monticola</i> |
| FBHAP80909  | <i>Bombus</i> | <i>Bombus monticola</i> |
| GBAH069306  | <i>Bombus</i> | <i>Bombus monticola</i> |
| GBAH069406  | <i>Bombus</i> | <i>Bombus monticola</i> |
| GBAH069506  | <i>Bombus</i> | <i>Bombus monticola</i> |
| GBAH069606  | <i>Bombus</i> | <i>Bombus monticola</i> |
| GBAH1700319 | <i>Bombus</i> | <i>Bombus monticola</i> |
| GBAH1700419 | <i>Bombus</i> | <i>Bombus monticola</i> |
| GBAH1700519 | <i>Bombus</i> | <i>Bombus monticola</i> |
| GBAH1700619 | <i>Bombus</i> | <i>Bombus monticola</i> |
| GBAH1700719 | <i>Bombus</i> | <i>Bombus monticola</i> |
| GBAH1700819 | <i>Bombus</i> | <i>Bombus monticola</i> |
| GBAH1701119 | <i>Bombus</i> | <i>Bombus monticola</i> |
| GBHAP76414  | <i>Bombus</i> | <i>Bombus monticola</i> |
| GBHAP76514  | <i>Bombus</i> | <i>Bombus monticola</i> |
| GBHAP76614  | <i>Bombus</i> | <i>Bombus monticola</i> |
| GBHAP76714  | <i>Bombus</i> | <i>Bombus monticola</i> |
| GBHAP76814  | <i>Bombus</i> | <i>Bombus monticola</i> |
| GBHAP76914  | <i>Bombus</i> | <i>Bombus monticola</i> |
| GBHAP77014  | <i>Bombus</i> | <i>Bombus monticola</i> |
| GBHAP77114  | <i>Bombus</i> | <i>Bombus monticola</i> |
| MHBEE05407  | <i>Bombus</i> | <i>Bombus monticola</i> |
| MHBEE06607  | <i>Bombus</i> | <i>Bombus monticola</i> |
| MHBEE06807  | <i>Bombus</i> | <i>Bombus monticola</i> |
| GBAH1092115 | <i>Bombus</i> | <i>Bombus morio</i>     |
| GBAH1092215 | <i>Bombus</i> | <i>Bombus morio</i>     |
| GBAH1092315 | <i>Bombus</i> | <i>Bombus morio</i>     |
| GBAH1092415 | <i>Bombus</i> | <i>Bombus morio</i>     |
| GBAH1092515 | <i>Bombus</i> | <i>Bombus morio</i>     |
| GBAH1092615 | <i>Bombus</i> | <i>Bombus morio</i>     |
| GBAH1654419 | <i>Bombus</i> | <i>Bombus morio</i>     |
| GBAH1654519 | <i>Bombus</i> | <i>Bombus morio</i>     |
| GBAH1654619 | <i>Bombus</i> | <i>Bombus morio</i>     |
| GBAH1654719 | <i>Bombus</i> | <i>Bombus morio</i>     |
| GBAH193806  | <i>Bombus</i> | <i>Bombus morio</i>     |
| GBHAP46214  | <i>Bombus</i> | <i>Bombus morio</i>     |
| GBHAP46314  | <i>Bombus</i> | <i>Bombus morio</i>     |
| GBHAP46414  | <i>Bombus</i> | <i>Bombus morio</i>     |

|              |               |                     |
|--------------|---------------|---------------------|
| GBHAP46514   | <i>Bombus</i> | <i>Bombus morio</i> |
| GBHAP46614   | <i>Bombus</i> | <i>Bombus morio</i> |
| GBMNB6101920 | <i>Bombus</i> | <i>Bombus morio</i> |
| GBMNB6102020 | <i>Bombus</i> | <i>Bombus morio</i> |
| GBMNB6102120 | <i>Bombus</i> | <i>Bombus morio</i> |
| GBMNB6102220 | <i>Bombus</i> | <i>Bombus morio</i> |
| GBMNB6102320 | <i>Bombus</i> | <i>Bombus morio</i> |
| GBMNB6102420 | <i>Bombus</i> | <i>Bombus morio</i> |
| GBMNB6102520 | <i>Bombus</i> | <i>Bombus morio</i> |
| GBMNB6102620 | <i>Bombus</i> | <i>Bombus morio</i> |
| GBMNB6102720 | <i>Bombus</i> | <i>Bombus morio</i> |
| GBMNB6102820 | <i>Bombus</i> | <i>Bombus morio</i> |
| GBMNB6102920 | <i>Bombus</i> | <i>Bombus morio</i> |
| GBMNB6103320 | <i>Bombus</i> | <i>Bombus morio</i> |
| GBMNB6103420 | <i>Bombus</i> | <i>Bombus morio</i> |
| GBMNB6103520 | <i>Bombus</i> | <i>Bombus morio</i> |
| GBMNB6103620 | <i>Bombus</i> | <i>Bombus morio</i> |
| GBMNB6103720 | <i>Bombus</i> | <i>Bombus morio</i> |
| GBMNB6103820 | <i>Bombus</i> | <i>Bombus morio</i> |
| GBMNB6103920 | <i>Bombus</i> | <i>Bombus morio</i> |
| GBMNB6104020 | <i>Bombus</i> | <i>Bombus morio</i> |
| GBMNB6104120 | <i>Bombus</i> | <i>Bombus morio</i> |
| GBMNB6104220 | <i>Bombus</i> | <i>Bombus morio</i> |
| GBMNB6104320 | <i>Bombus</i> | <i>Bombus morio</i> |
| GBMNB6104420 | <i>Bombus</i> | <i>Bombus morio</i> |
| GBMNB6104520 | <i>Bombus</i> | <i>Bombus morio</i> |
| GBMNB6104620 | <i>Bombus</i> | <i>Bombus morio</i> |
| GBMNB6104720 | <i>Bombus</i> | <i>Bombus morio</i> |
| GBMNB6104820 | <i>Bombus</i> | <i>Bombus morio</i> |
| GBMNB6104920 | <i>Bombus</i> | <i>Bombus morio</i> |
| GBMNB6105020 | <i>Bombus</i> | <i>Bombus morio</i> |
| GBMNB6105120 | <i>Bombus</i> | <i>Bombus morio</i> |
| GBMNB6105220 | <i>Bombus</i> | <i>Bombus morio</i> |
| GBMNB6105320 | <i>Bombus</i> | <i>Bombus morio</i> |
| GBMNB6105420 | <i>Bombus</i> | <i>Bombus morio</i> |
| GBMNB6105520 | <i>Bombus</i> | <i>Bombus morio</i> |
| GBMNB6105620 | <i>Bombus</i> | <i>Bombus morio</i> |
| GBMNB6105720 | <i>Bombus</i> | <i>Bombus morio</i> |
| GBMNB6105820 | <i>Bombus</i> | <i>Bombus morio</i> |
| GBMNB6105920 | <i>Bombus</i> | <i>Bombus morio</i> |
| GBMNB6106020 | <i>Bombus</i> | <i>Bombus morio</i> |
| GBMNB6106120 | <i>Bombus</i> | <i>Bombus morio</i> |
| GBMNB6106220 | <i>Bombus</i> | <i>Bombus morio</i> |
| GBMNB6106320 | <i>Bombus</i> | <i>Bombus morio</i> |
| GBMNB6106420 | <i>Bombus</i> | <i>Bombus morio</i> |
| GBMNB6106720 | <i>Bombus</i> | <i>Bombus morio</i> |



|              |               |                     |
|--------------|---------------|---------------------|
| GBMNB6106820 | <i>Bombus</i> | <i>Bombus morio</i> |
| GBMNB6106920 | <i>Bombus</i> | <i>Bombus morio</i> |
| GBMNB6107020 | <i>Bombus</i> | <i>Bombus morio</i> |
| GBMNB6107120 | <i>Bombus</i> | <i>Bombus morio</i> |
| GBMNB6107220 | <i>Bombus</i> | <i>Bombus morio</i> |
| GBMNB6107320 | <i>Bombus</i> | <i>Bombus morio</i> |
| GBMNB6107420 | <i>Bombus</i> | <i>Bombus morio</i> |
| GBMNB6107520 | <i>Bombus</i> | <i>Bombus morio</i> |
| GBMNB6107620 | <i>Bombus</i> | <i>Bombus morio</i> |
| GBMNB6107720 | <i>Bombus</i> | <i>Bombus morio</i> |
| GBMNB6107820 | <i>Bombus</i> | <i>Bombus morio</i> |
| GBMNB6107920 | <i>Bombus</i> | <i>Bombus morio</i> |
| GBMNB6108020 | <i>Bombus</i> | <i>Bombus morio</i> |
| GBMNB6108120 | <i>Bombus</i> | <i>Bombus morio</i> |
| GBMNB6108220 | <i>Bombus</i> | <i>Bombus morio</i> |
| GBMNB6108320 | <i>Bombus</i> | <i>Bombus morio</i> |
| GBMNB6108420 | <i>Bombus</i> | <i>Bombus morio</i> |
| GBMNB6108520 | <i>Bombus</i> | <i>Bombus morio</i> |
| GBMNB6108620 | <i>Bombus</i> | <i>Bombus morio</i> |
| GBMNB6108720 | <i>Bombus</i> | <i>Bombus morio</i> |
| GBMNB6108820 | <i>Bombus</i> | <i>Bombus morio</i> |
| GBMNB6108920 | <i>Bombus</i> | <i>Bombus morio</i> |
| GBMNB6109020 | <i>Bombus</i> | <i>Bombus morio</i> |
| GBMNB6109120 | <i>Bombus</i> | <i>Bombus morio</i> |
| GBMNB6109220 | <i>Bombus</i> | <i>Bombus morio</i> |
| GBMNB6109320 | <i>Bombus</i> | <i>Bombus morio</i> |
| GBMNB6109420 | <i>Bombus</i> | <i>Bombus morio</i> |
| GBMNB6109520 | <i>Bombus</i> | <i>Bombus morio</i> |
| GBMNB6109620 | <i>Bombus</i> | <i>Bombus morio</i> |
| GBMNB6109720 | <i>Bombus</i> | <i>Bombus morio</i> |
| GBMNB6109820 | <i>Bombus</i> | <i>Bombus morio</i> |
| GBMNB6109920 | <i>Bombus</i> | <i>Bombus morio</i> |
| GBMNB6110120 | <i>Bombus</i> | <i>Bombus morio</i> |
| GBMNB6110220 | <i>Bombus</i> | <i>Bombus morio</i> |
| GBMNB6110320 | <i>Bombus</i> | <i>Bombus morio</i> |
| GBMNB6110420 | <i>Bombus</i> | <i>Bombus morio</i> |
| GBMNB6110520 | <i>Bombus</i> | <i>Bombus morio</i> |
| GBMNB6110720 | <i>Bombus</i> | <i>Bombus morio</i> |
| GBMNB6110820 | <i>Bombus</i> | <i>Bombus morio</i> |
| GBMNB6110920 | <i>Bombus</i> | <i>Bombus morio</i> |
| GBMNB6111020 | <i>Bombus</i> | <i>Bombus morio</i> |
| GBMNB6111120 | <i>Bombus</i> | <i>Bombus morio</i> |
| GBMNB6111220 | <i>Bombus</i> | <i>Bombus morio</i> |
| GBMNB6111320 | <i>Bombus</i> | <i>Bombus morio</i> |
| GBMNB6111420 | <i>Bombus</i> | <i>Bombus morio</i> |
| GBMNB6111520 | <i>Bombus</i> | <i>Bombus morio</i> |

|              |               |                     |
|--------------|---------------|---------------------|
| GBMNB6111620 | <i>Bombus</i> | <i>Bombus morio</i> |
| GBMNB6111720 | <i>Bombus</i> | <i>Bombus morio</i> |
| GBMNB6111820 | <i>Bombus</i> | <i>Bombus morio</i> |
| GBMNB6111920 | <i>Bombus</i> | <i>Bombus morio</i> |
| GBMNB6112020 | <i>Bombus</i> | <i>Bombus morio</i> |
| GBMNB6112120 | <i>Bombus</i> | <i>Bombus morio</i> |
| GBMNB6112220 | <i>Bombus</i> | <i>Bombus morio</i> |
| GBMNB6112320 | <i>Bombus</i> | <i>Bombus morio</i> |
| GBMNB6112420 | <i>Bombus</i> | <i>Bombus morio</i> |
| GBMNB6112520 | <i>Bombus</i> | <i>Bombus morio</i> |
| GBMNB6112620 | <i>Bombus</i> | <i>Bombus morio</i> |
| GBMNB6112820 | <i>Bombus</i> | <i>Bombus morio</i> |
| GBMNB6112920 | <i>Bombus</i> | <i>Bombus morio</i> |
| GBMNB6113020 | <i>Bombus</i> | <i>Bombus morio</i> |
| GBMNB6113120 | <i>Bombus</i> | <i>Bombus morio</i> |
| GBMNB6113220 | <i>Bombus</i> | <i>Bombus morio</i> |
| GBMNB6116520 | <i>Bombus</i> | <i>Bombus morio</i> |
| GBMNB6116620 | <i>Bombus</i> | <i>Bombus morio</i> |
| GBMNB6116720 | <i>Bombus</i> | <i>Bombus morio</i> |
| GBMNB6116820 | <i>Bombus</i> | <i>Bombus morio</i> |
| GBMNB6116920 | <i>Bombus</i> | <i>Bombus morio</i> |
| GBMNB6117020 | <i>Bombus</i> | <i>Bombus morio</i> |
| GBMNB6117120 | <i>Bombus</i> | <i>Bombus morio</i> |
| GBMNB6117220 | <i>Bombus</i> | <i>Bombus morio</i> |
| GBMNB6117320 | <i>Bombus</i> | <i>Bombus morio</i> |
| GBMNB6117420 | <i>Bombus</i> | <i>Bombus morio</i> |
| GBMNB6117520 | <i>Bombus</i> | <i>Bombus morio</i> |
| GBMNB6117620 | <i>Bombus</i> | <i>Bombus morio</i> |
| GBMNB6117720 | <i>Bombus</i> | <i>Bombus morio</i> |
| GBMNB6117820 | <i>Bombus</i> | <i>Bombus morio</i> |
| GBMNB6117920 | <i>Bombus</i> | <i>Bombus morio</i> |
| GBMNB6118020 | <i>Bombus</i> | <i>Bombus morio</i> |
| GBMNB6131220 | <i>Bombus</i> | <i>Bombus morio</i> |
| GBMNB6131320 | <i>Bombus</i> | <i>Bombus morio</i> |
| GBMNB6131420 | <i>Bombus</i> | <i>Bombus morio</i> |
| GBMNB6131520 | <i>Bombus</i> | <i>Bombus morio</i> |
| GBMNB6131620 | <i>Bombus</i> | <i>Bombus morio</i> |
| GBMNB6131720 | <i>Bombus</i> | <i>Bombus morio</i> |
| GBMNB6131820 | <i>Bombus</i> | <i>Bombus morio</i> |
| GBMNB6131920 | <i>Bombus</i> | <i>Bombus morio</i> |
| GBMNB6132020 | <i>Bombus</i> | <i>Bombus morio</i> |
| GBMNB6132120 | <i>Bombus</i> | <i>Bombus morio</i> |
| GBMNB6132220 | <i>Bombus</i> | <i>Bombus morio</i> |
| GBMNB6132320 | <i>Bombus</i> | <i>Bombus morio</i> |
| GBMNB6132420 | <i>Bombus</i> | <i>Bombus morio</i> |
| GBMNB6132520 | <i>Bombus</i> | <i>Bombus morio</i> |

|              |               |                         |
|--------------|---------------|-------------------------|
| GBMNB6132620 | <i>Bombus</i> | <i>Bombus morio</i>     |
| GBMNB6132720 | <i>Bombus</i> | <i>Bombus morio</i>     |
| GBMNB6132820 | <i>Bombus</i> | <i>Bombus morio</i>     |
| GBMNB6132920 | <i>Bombus</i> | <i>Bombus morio</i>     |
| GBMNB6133020 | <i>Bombus</i> | <i>Bombus morio</i>     |
| GBMNB6133120 | <i>Bombus</i> | <i>Bombus morio</i>     |
| GBMNB6133220 | <i>Bombus</i> | <i>Bombus morio</i>     |
| GBMNB6133320 | <i>Bombus</i> | <i>Bombus morio</i>     |
| GBMNB6133420 | <i>Bombus</i> | <i>Bombus morio</i>     |
| GBMNB6133520 | <i>Bombus</i> | <i>Bombus morio</i>     |
| GBMNB6133620 | <i>Bombus</i> | <i>Bombus morio</i>     |
| GBMNB6133720 | <i>Bombus</i> | <i>Bombus morio</i>     |
| GBMNB6133820 | <i>Bombus</i> | <i>Bombus morio</i>     |
| GBMNB6133920 | <i>Bombus</i> | <i>Bombus morio</i>     |
| GBMNB6134020 | <i>Bombus</i> | <i>Bombus morio</i>     |
| GBMNB6134120 | <i>Bombus</i> | <i>Bombus morio</i>     |
| GBMNB6134220 | <i>Bombus</i> | <i>Bombus morio</i>     |
| GBMNB6134320 | <i>Bombus</i> | <i>Bombus morio</i>     |
| GBMNB6134420 | <i>Bombus</i> | <i>Bombus morio</i>     |
| GBMNB6134520 | <i>Bombus</i> | <i>Bombus morio</i>     |
| GBMNB6134620 | <i>Bombus</i> | <i>Bombus morio</i>     |
| GBMNB6134720 | <i>Bombus</i> | <i>Bombus morio</i>     |
| GBMNB6134820 | <i>Bombus</i> | <i>Bombus morio</i>     |
| GBMNB6134920 | <i>Bombus</i> | <i>Bombus morio</i>     |
| GBMNB6135020 | <i>Bombus</i> | <i>Bombus morio</i>     |
| GBMNB6138720 | <i>Bombus</i> | <i>Bombus morio</i>     |
| GBMNB6138820 | <i>Bombus</i> | <i>Bombus morio</i>     |
| GBMNB6138920 | <i>Bombus</i> | <i>Bombus morio</i>     |
| GBMNB6139020 | <i>Bombus</i> | <i>Bombus morio</i>     |
| GBMNB6139120 | <i>Bombus</i> | <i>Bombus morio</i>     |
| GBMNB6139220 | <i>Bombus</i> | <i>Bombus morio</i>     |
| GBMNB6139320 | <i>Bombus</i> | <i>Bombus morio</i>     |
| GBMNB6139420 | <i>Bombus</i> | <i>Bombus morio</i>     |
| GBMNB6139520 | <i>Bombus</i> | <i>Bombus morio</i>     |
| GBMNB6139620 | <i>Bombus</i> | <i>Bombus morio</i>     |
| GBMNB6139720 | <i>Bombus</i> | <i>Bombus morio</i>     |
| GBMNB6139820 | <i>Bombus</i> | <i>Bombus morio</i>     |
| GBMNB6139920 | <i>Bombus</i> | <i>Bombus morio</i>     |
| GBMNB6140020 | <i>Bombus</i> | <i>Bombus morio</i>     |
| GBMNB6299520 | <i>Bombus</i> | <i>Bombus morio</i>     |
| LASNA48408   | <i>Bombus</i> | <i>Bombus morio</i>     |
| LASNA57908   | <i>Bombus</i> | <i>Bombus morio</i>     |
| BBHYA07612   | <i>Bombus</i> | <i>Bombus morrisoni</i> |
| BEECC44108   | <i>Bombus</i> | <i>Bombus morrisoni</i> |
| BEECC44208   | <i>Bombus</i> | <i>Bombus morrisoni</i> |
| BEECC82909   | <i>Bombus</i> | <i>Bombus morrisoni</i> |

|             |               |                          |
|-------------|---------------|--------------------------|
| BEECC83009  | <i>Bombus</i> | <i>Bombus morrisoni</i>  |
| BEECC83209  | <i>Bombus</i> | <i>Bombus morrisoni</i>  |
| FBAPD63111  | <i>Bombus</i> | <i>Bombus mucidus</i>    |
| FBHAP81409  | <i>Bombus</i> | <i>Bombus mucidus</i>    |
| GBAH1835019 | <i>Bombus</i> | <i>Bombus mucidus</i>    |
| GBAH1835119 | <i>Bombus</i> | <i>Bombus mucidus</i>    |
| GBAH1835219 | <i>Bombus</i> | <i>Bombus mucidus</i>    |
| GBAH1835319 | <i>Bombus</i> | <i>Bombus mucidus</i>    |
| GBAH1835419 | <i>Bombus</i> | <i>Bombus mucidus</i>    |
| GBAH1835519 | <i>Bombus</i> | <i>Bombus mucidus</i>    |
| GBAH1835619 | <i>Bombus</i> | <i>Bombus mucidus</i>    |
| GBAH1835719 | <i>Bombus</i> | <i>Bombus mucidus</i>    |
| FBHAP81609  | <i>Bombus</i> | <i>Bombus muscorum</i>   |
| GBAH069706  | <i>Bombus</i> | <i>Bombus muscorum</i>   |
| GBAH069806  | <i>Bombus</i> | <i>Bombus muscorum</i>   |
| GBAH069906  | <i>Bombus</i> | <i>Bombus muscorum</i>   |
| BBWP63312   | <i>Bombus</i> | <i>Bombus neoboreus</i>  |
| BEECF87212  | <i>Bombus</i> | <i>Bombus neoboreus</i>  |
| BEECF88312  | <i>Bombus</i> | <i>Bombus neoboreus</i>  |
| WASPS69916  | <i>Bombus</i> | <i>Bombus neoboreus</i>  |
| WASPS70516  | <i>Bombus</i> | <i>Bombus neoboreus</i>  |
| WASPS70616  | <i>Bombus</i> | <i>Bombus neoboreus</i>  |
| BBHYG65310  | <i>Bombus</i> | <i>Bombus nevadensis</i> |
| BBHYL25310  | <i>Bombus</i> | <i>Bombus nevadensis</i> |
| BBHYL28610  | <i>Bombus</i> | <i>Bombus nevadensis</i> |
| BEECA31206  | <i>Bombus</i> | <i>Bombus nevadensis</i> |
| BEECA31306  | <i>Bombus</i> | <i>Bombus nevadensis</i> |
| BEECA31406  | <i>Bombus</i> | <i>Bombus nevadensis</i> |
| BEECA31506  | <i>Bombus</i> | <i>Bombus nevadensis</i> |
| CNGSB03015  | <i>Bombus</i> | <i>Bombus nevadensis</i> |
| CNGSD729215 | <i>Bombus</i> | <i>Bombus nevadensis</i> |
| CNRME79912  | <i>Bombus</i> | <i>Bombus nevadensis</i> |
| CNRME80912  | <i>Bombus</i> | <i>Bombus nevadensis</i> |
| CNWLF198412 | <i>Bombus</i> | <i>Bombus nevadensis</i> |
| HYMBB00609  | <i>Bombus</i> | <i>Bombus nevadensis</i> |
| HYMBB00709  | <i>Bombus</i> | <i>Bombus nevadensis</i> |
| HYMBC00510  | <i>Bombus</i> | <i>Bombus nevadensis</i> |
| NGNAX200214 | <i>Bombus</i> | <i>Bombus nevadensis</i> |
| TTHYW04508  | <i>Bombus</i> | <i>Bombus nevadensis</i> |
| FBHAP81709  | <i>Bombus</i> | <i>Bombus norvegicus</i> |
| FBHAP81809  | <i>Bombus</i> | <i>Bombus norvegicus</i> |
| FBSYM29410  | <i>Bombus</i> | <i>Bombus norvegicus</i> |
| FBSYM29510  | <i>Bombus</i> | <i>Bombus norvegicus</i> |
| GBAH074906  | <i>Bombus</i> | <i>Bombus norvegicus</i> |
| GBSP020206  | <i>Bombus</i> | <i>Bombus norvegicus</i> |
| GBSP020306  | <i>Bombus</i> | <i>Bombus norvegicus</i> |

|            |               |                            |
|------------|---------------|----------------------------|
| AMCAF35419 | <i>Bombus</i> | <i>Bombus occidentalis</i> |
| BBBO14210  | <i>Bombus</i> | <i>Bombus occidentalis</i> |
| BBBO14410  | <i>Bombus</i> | <i>Bombus occidentalis</i> |
| BBHYL24710 | <i>Bombus</i> | <i>Bombus occidentalis</i> |
| BCII88410  | <i>Bombus</i> | <i>Bombus occidentalis</i> |
| BCII88510  | <i>Bombus</i> | <i>Bombus occidentalis</i> |
| BCII88610  | <i>Bombus</i> | <i>Bombus occidentalis</i> |
| BCII88710  | <i>Bombus</i> | <i>Bombus occidentalis</i> |
| BCII88810  | <i>Bombus</i> | <i>Bombus occidentalis</i> |
| BCII88910  | <i>Bombus</i> | <i>Bombus occidentalis</i> |
| BCII89010  | <i>Bombus</i> | <i>Bombus occidentalis</i> |
| BCII89110  | <i>Bombus</i> | <i>Bombus occidentalis</i> |
| BCLRB92710 | <i>Bombus</i> | <i>Bombus occidentalis</i> |
| BCLRB92810 | <i>Bombus</i> | <i>Bombus occidentalis</i> |
| BCLRB92910 | <i>Bombus</i> | <i>Bombus occidentalis</i> |
| BCLRB93010 | <i>Bombus</i> | <i>Bombus occidentalis</i> |
| BCLRB93110 | <i>Bombus</i> | <i>Bombus occidentalis</i> |
| BEECB61107 | <i>Bombus</i> | <i>Bombus occidentalis</i> |
| BEECC44608 | <i>Bombus</i> | <i>Bombus occidentalis</i> |
| BEECD38109 | <i>Bombus</i> | <i>Bombus occidentalis</i> |
| BEECD39009 | <i>Bombus</i> | <i>Bombus occidentalis</i> |
| BEECD44709 | <i>Bombus</i> | <i>Bombus occidentalis</i> |
| BEECD44809 | <i>Bombus</i> | <i>Bombus occidentalis</i> |
| BEECD44909 | <i>Bombus</i> | <i>Bombus occidentalis</i> |
| BEECD45009 | <i>Bombus</i> | <i>Bombus occidentalis</i> |
| BEECD45109 | <i>Bombus</i> | <i>Bombus occidentalis</i> |
| BEECD45209 | <i>Bombus</i> | <i>Bombus occidentalis</i> |
| BEECD45409 | <i>Bombus</i> | <i>Bombus occidentalis</i> |
| BEECD45509 | <i>Bombus</i> | <i>Bombus occidentalis</i> |
| BEECD45609 | <i>Bombus</i> | <i>Bombus occidentalis</i> |
| BEECD45709 | <i>Bombus</i> | <i>Bombus occidentalis</i> |
| BEECD45809 | <i>Bombus</i> | <i>Bombus occidentalis</i> |
| BEECD45909 | <i>Bombus</i> | <i>Bombus occidentalis</i> |
| BEECD46009 | <i>Bombus</i> | <i>Bombus occidentalis</i> |
| BEECD46109 | <i>Bombus</i> | <i>Bombus occidentalis</i> |
| BEECD46209 | <i>Bombus</i> | <i>Bombus occidentalis</i> |
| BEECD46309 | <i>Bombus</i> | <i>Bombus occidentalis</i> |
| BEECD46509 | <i>Bombus</i> | <i>Bombus occidentalis</i> |
| BEECD46609 | <i>Bombus</i> | <i>Bombus occidentalis</i> |
| BEECD46709 | <i>Bombus</i> | <i>Bombus occidentalis</i> |
| BEECD46809 | <i>Bombus</i> | <i>Bombus occidentalis</i> |
| BEECD46909 | <i>Bombus</i> | <i>Bombus occidentalis</i> |
| BEECD47009 | <i>Bombus</i> | <i>Bombus occidentalis</i> |
| BEECD47109 | <i>Bombus</i> | <i>Bombus occidentalis</i> |
| BEECD47209 | <i>Bombus</i> | <i>Bombus occidentalis</i> |
| BEECD47309 | <i>Bombus</i> | <i>Bombus occidentalis</i> |

|            |               |                            |
|------------|---------------|----------------------------|
| BEECD47409 | <i>Bombus</i> | <i>Bombus occidentalis</i> |
| BEECD47509 | <i>Bombus</i> | <i>Bombus occidentalis</i> |
| BEECD73209 | <i>Bombus</i> | <i>Bombus occidentalis</i> |
| BEECD74109 | <i>Bombus</i> | <i>Bombus occidentalis</i> |
| BEECD74209 | <i>Bombus</i> | <i>Bombus occidentalis</i> |
| BEECD82110 | <i>Bombus</i> | <i>Bombus occidentalis</i> |
| BEECD82210 | <i>Bombus</i> | <i>Bombus occidentalis</i> |
| BEECD82410 | <i>Bombus</i> | <i>Bombus occidentalis</i> |
| BEECE45310 | <i>Bombus</i> | <i>Bombus occidentalis</i> |
| BEECE52510 | <i>Bombus</i> | <i>Bombus occidentalis</i> |
| BEECE52610 | <i>Bombus</i> | <i>Bombus occidentalis</i> |
| BEECE53610 | <i>Bombus</i> | <i>Bombus occidentalis</i> |
| BEECE53710 | <i>Bombus</i> | <i>Bombus occidentalis</i> |
| BEECE69410 | <i>Bombus</i> | <i>Bombus occidentalis</i> |
| BEECE69510 | <i>Bombus</i> | <i>Bombus occidentalis</i> |
| BEECE69610 | <i>Bombus</i> | <i>Bombus occidentalis</i> |
| BEECE69710 | <i>Bombus</i> | <i>Bombus occidentalis</i> |
| BEECE70810 | <i>Bombus</i> | <i>Bombus occidentalis</i> |
| BEECE70910 | <i>Bombus</i> | <i>Bombus occidentalis</i> |
| BEECE72910 | <i>Bombus</i> | <i>Bombus occidentalis</i> |
| BEECF00110 | <i>Bombus</i> | <i>Bombus occidentalis</i> |
| BEECF00210 | <i>Bombus</i> | <i>Bombus occidentalis</i> |
| BEECF00310 | <i>Bombus</i> | <i>Bombus occidentalis</i> |
| BEECF00410 | <i>Bombus</i> | <i>Bombus occidentalis</i> |
| BEECF00510 | <i>Bombus</i> | <i>Bombus occidentalis</i> |
| BEECF00810 | <i>Bombus</i> | <i>Bombus occidentalis</i> |
| BEECF57211 | <i>Bombus</i> | <i>Bombus occidentalis</i> |
| BEECF57311 | <i>Bombus</i> | <i>Bombus occidentalis</i> |
| BEECF57411 | <i>Bombus</i> | <i>Bombus occidentalis</i> |
| BEECF57611 | <i>Bombus</i> | <i>Bombus occidentalis</i> |
| BEECF57711 | <i>Bombus</i> | <i>Bombus occidentalis</i> |
| BEECF57811 | <i>Bombus</i> | <i>Bombus occidentalis</i> |
| BEECF57911 | <i>Bombus</i> | <i>Bombus occidentalis</i> |
| BEECF58011 | <i>Bombus</i> | <i>Bombus occidentalis</i> |
| BEECF58311 | <i>Bombus</i> | <i>Bombus occidentalis</i> |
| BEECF58411 | <i>Bombus</i> | <i>Bombus occidentalis</i> |
| BEECF58511 | <i>Bombus</i> | <i>Bombus occidentalis</i> |
| BEECF58611 | <i>Bombus</i> | <i>Bombus occidentalis</i> |
| BEECF79712 | <i>Bombus</i> | <i>Bombus occidentalis</i> |
| BEECF79812 | <i>Bombus</i> | <i>Bombus occidentalis</i> |
| BEECF79912 | <i>Bombus</i> | <i>Bombus occidentalis</i> |
| BEECF80012 | <i>Bombus</i> | <i>Bombus occidentalis</i> |
| BEECF81012 | <i>Bombus</i> | <i>Bombus occidentalis</i> |
| BEECF81112 | <i>Bombus</i> | <i>Bombus occidentalis</i> |
| BEECF81212 | <i>Bombus</i> | <i>Bombus occidentalis</i> |
| BEECF87612 | <i>Bombus</i> | <i>Bombus occidentalis</i> |

|              |               |                            |
|--------------|---------------|----------------------------|
| BEECF95513   | <i>Bombus</i> | <i>Bombus occidentalis</i> |
| BEECF95613   | <i>Bombus</i> | <i>Bombus occidentalis</i> |
| BOWGF78609   | <i>Bombus</i> | <i>Bombus occidentalis</i> |
| CNKLF219315  | <i>Bombus</i> | <i>Bombus occidentalis</i> |
| CNWLD88012   | <i>Bombus</i> | <i>Bombus occidentalis</i> |
| CNWLF196712  | <i>Bombus</i> | <i>Bombus occidentalis</i> |
| CNWLF197412  | <i>Bombus</i> | <i>Bombus occidentalis</i> |
| CNWLF197512  | <i>Bombus</i> | <i>Bombus occidentalis</i> |
| CNWLF198012  | <i>Bombus</i> | <i>Bombus occidentalis</i> |
| CNWLN102413  | <i>Bombus</i> | <i>Bombus occidentalis</i> |
| CNWLN102713  | <i>Bombus</i> | <i>Bombus occidentalis</i> |
| CNWLN102913  | <i>Bombus</i> | <i>Bombus occidentalis</i> |
| INRMA322217  | <i>Bombus</i> | <i>Bombus occidentalis</i> |
| INRMA322417  | <i>Bombus</i> | <i>Bombus occidentalis</i> |
| INRMA322517  | <i>Bombus</i> | <i>Bombus occidentalis</i> |
| INRMA322617  | <i>Bombus</i> | <i>Bombus occidentalis</i> |
| INRMA322717  | <i>Bombus</i> | <i>Bombus occidentalis</i> |
| INRMA322817  | <i>Bombus</i> | <i>Bombus occidentalis</i> |
| INRMA322917  | <i>Bombus</i> | <i>Bombus occidentalis</i> |
| INRMA323117  | <i>Bombus</i> | <i>Bombus occidentalis</i> |
| INRMA323217  | <i>Bombus</i> | <i>Bombus occidentalis</i> |
| INRMA323417  | <i>Bombus</i> | <i>Bombus occidentalis</i> |
| KNWRA02312   | <i>Bombus</i> | <i>Bombus occidentalis</i> |
| RBCMI105614  | <i>Bombus</i> | <i>Bombus occidentalis</i> |
| TTHYW33708   | <i>Bombus</i> | <i>Bombus occidentalis</i> |
| UAMIC75113   | <i>Bombus</i> | <i>Bombus occidentalis</i> |
| UAMIC75213   | <i>Bombus</i> | <i>Bombus occidentalis</i> |
| GBHAP30014   | <i>Bombus</i> | <i>Bombus opifex</i>       |
| GBMIN7270817 | <i>Bombus</i> | <i>Bombus opulentus</i>    |
| GBMIN7270917 | <i>Bombus</i> | <i>Bombus opulentus</i>    |
| GBMIN7271017 | <i>Bombus</i> | <i>Bombus opulentus</i>    |
| BEEEE03015   | <i>Bombus</i> | <i>Bombus pascuorum</i>    |
| BEEEE08615   | <i>Bombus</i> | <i>Bombus pascuorum</i>    |
| BEEEE31316   | <i>Bombus</i> | <i>Bombus pascuorum</i>    |
| BOWGF18308   | <i>Bombus</i> | <i>Bombus pascuorum</i>    |
| FBAPC71411   | <i>Bombus</i> | <i>Bombus pascuorum</i>    |
| FBHAP78509   | <i>Bombus</i> | <i>Bombus pascuorum</i>    |
| FBHAP82309   | <i>Bombus</i> | <i>Bombus pascuorum</i>    |
| FBHAP83209   | <i>Bombus</i> | <i>Bombus pascuorum</i>    |
| GBACU241613  | <i>Bombus</i> | <i>Bombus pascuorum</i>    |
| GBACU241713  | <i>Bombus</i> | <i>Bombus pascuorum</i>    |
| GBACU346113  | <i>Bombus</i> | <i>Bombus pascuorum</i>    |
| GBACU346213  | <i>Bombus</i> | <i>Bombus pascuorum</i>    |
| GBACU346313  | <i>Bombus</i> | <i>Bombus pascuorum</i>    |
| GBACU346613  | <i>Bombus</i> | <i>Bombus pascuorum</i>    |
| GBACU97612   | <i>Bombus</i> | <i>Bombus pascuorum</i>    |

|              |               |                         |                             |
|--------------|---------------|-------------------------|-----------------------------|
| GBACU97712   | <i>Bombus</i> | <i>Bombus pascuorum</i> |                             |
| GBAH037406   | <i>Bombus</i> | <i>Bombus pascuorum</i> | <i>Bombus flavobarbatus</i> |
| GBAH070006   | <i>Bombus</i> | <i>Bombus pascuorum</i> |                             |
| GBAH070106   | <i>Bombus</i> | <i>Bombus pascuorum</i> |                             |
| GBAH070206   | <i>Bombus</i> | <i>Bombus pascuorum</i> |                             |
| GBAH070306   | <i>Bombus</i> | <i>Bombus pascuorum</i> |                             |
| GBAH070406   | <i>Bombus</i> | <i>Bombus pascuorum</i> |                             |
| GBAH070506   | <i>Bombus</i> | <i>Bombus pascuorum</i> |                             |
| GBAH070606   | <i>Bombus</i> | <i>Bombus pascuorum</i> |                             |
| GBAH070706   | <i>Bombus</i> | <i>Bombus pascuorum</i> |                             |
| GBAH1709519  | <i>Bombus</i> | <i>Bombus pascuorum</i> |                             |
| GBAH1709619  | <i>Bombus</i> | <i>Bombus pascuorum</i> |                             |
| GBAH1709719  | <i>Bombus</i> | <i>Bombus pascuorum</i> |                             |
| GBAH1709819  | <i>Bombus</i> | <i>Bombus pascuorum</i> |                             |
| GBAH1709919  | <i>Bombus</i> | <i>Bombus pascuorum</i> |                             |
| GBAH1710019  | <i>Bombus</i> | <i>Bombus pascuorum</i> |                             |
| GBAH1710119  | <i>Bombus</i> | <i>Bombus pascuorum</i> |                             |
| GBAH1710219  | <i>Bombus</i> | <i>Bombus pascuorum</i> |                             |
| GBAH1710319  | <i>Bombus</i> | <i>Bombus pascuorum</i> |                             |
| GBAH1710419  | <i>Bombus</i> | <i>Bombus pascuorum</i> |                             |
| GBAH1710519  | <i>Bombus</i> | <i>Bombus pascuorum</i> |                             |
| GBAH1710619  | <i>Bombus</i> | <i>Bombus pascuorum</i> |                             |
| GBAH1710719  | <i>Bombus</i> | <i>Bombus pascuorum</i> |                             |
| GBAH1710819  | <i>Bombus</i> | <i>Bombus pascuorum</i> |                             |
| GBAH1741419  | <i>Bombus</i> | <i>Bombus pascuorum</i> |                             |
| GBAH1835819  | <i>Bombus</i> | <i>Bombus pascuorum</i> |                             |
| GBMIN1801913 | <i>Bombus</i> | <i>Bombus pascuorum</i> |                             |
| GBMIN7271117 | <i>Bombus</i> | <i>Bombus pascuorum</i> |                             |
| GBMIN7271217 | <i>Bombus</i> | <i>Bombus pascuorum</i> |                             |
| GBMIN7271317 | <i>Bombus</i> | <i>Bombus pascuorum</i> |                             |
| GBMIN7271417 | <i>Bombus</i> | <i>Bombus pascuorum</i> |                             |
| GBMIN7271517 | <i>Bombus</i> | <i>Bombus pascuorum</i> |                             |
| GBMIN7271617 | <i>Bombus</i> | <i>Bombus pascuorum</i> |                             |
| GBMIN7271717 | <i>Bombus</i> | <i>Bombus pascuorum</i> |                             |
| GBMIN7271817 | <i>Bombus</i> | <i>Bombus pascuorum</i> |                             |
| GBMIN7271917 | <i>Bombus</i> | <i>Bombus pascuorum</i> |                             |
| GBMIN7272017 | <i>Bombus</i> | <i>Bombus pascuorum</i> |                             |
| GBMIN7272117 | <i>Bombus</i> | <i>Bombus pascuorum</i> |                             |
| GBMIN7272217 | <i>Bombus</i> | <i>Bombus pascuorum</i> |                             |
| GBMIN7272317 | <i>Bombus</i> | <i>Bombus pascuorum</i> |                             |
| GBMIN7272417 | <i>Bombus</i> | <i>Bombus pascuorum</i> |                             |
| GBMIN7272517 | <i>Bombus</i> | <i>Bombus pascuorum</i> |                             |
| GBMIN7272617 | <i>Bombus</i> | <i>Bombus pascuorum</i> |                             |
| GBMIN7272717 | <i>Bombus</i> | <i>Bombus pascuorum</i> |                             |
| GBMIN7272817 | <i>Bombus</i> | <i>Bombus pascuorum</i> |                             |
| GBMIN7272917 | <i>Bombus</i> | <i>Bombus pascuorum</i> |                             |



|              |               |                         |
|--------------|---------------|-------------------------|
| GBMIN7273017 | <i>Bombus</i> | <i>Bombus pascuorum</i> |
| GBMIN7273117 | <i>Bombus</i> | <i>Bombus pascuorum</i> |
| GBMIN7273217 | <i>Bombus</i> | <i>Bombus pascuorum</i> |
| GBMIN7273317 | <i>Bombus</i> | <i>Bombus pascuorum</i> |
| GBMIN7273417 | <i>Bombus</i> | <i>Bombus pascuorum</i> |
| GBMIN7273517 | <i>Bombus</i> | <i>Bombus pascuorum</i> |
| GBMIN7273617 | <i>Bombus</i> | <i>Bombus pascuorum</i> |
| GBMIN7273717 | <i>Bombus</i> | <i>Bombus pascuorum</i> |
| GBMIN7273817 | <i>Bombus</i> | <i>Bombus pascuorum</i> |
| GBMIN7273917 | <i>Bombus</i> | <i>Bombus pascuorum</i> |
| GBMIN7274017 | <i>Bombus</i> | <i>Bombus pascuorum</i> |
| GBMIN7274117 | <i>Bombus</i> | <i>Bombus pascuorum</i> |
| GBMIN7274217 | <i>Bombus</i> | <i>Bombus pascuorum</i> |
| GMFID70212   | <i>Bombus</i> | <i>Bombus pascuorum</i> |
| GMGRB135613  | <i>Bombus</i> | <i>Bombus pascuorum</i> |
| IBBP06510    | <i>Bombus</i> | <i>Bombus pascuorum</i> |
| IBBP06610    | <i>Bombus</i> | <i>Bombus pascuorum</i> |
| POLLE03218   | <i>Bombus</i> | <i>Bombus pascuorum</i> |
| POLLE05418   | <i>Bombus</i> | <i>Bombus pascuorum</i> |
| POLLE05518   | <i>Bombus</i> | <i>Bombus pascuorum</i> |
| POLLE08818   | <i>Bombus</i> | <i>Bombus pascuorum</i> |
| POLLE103319  | <i>Bombus</i> | <i>Bombus pascuorum</i> |
| POLLE105319  | <i>Bombus</i> | <i>Bombus pascuorum</i> |
| POLLE115619  | <i>Bombus</i> | <i>Bombus pascuorum</i> |
| POLLE14418   | <i>Bombus</i> | <i>Bombus pascuorum</i> |
| POLLE148919  | <i>Bombus</i> | <i>Bombus pascuorum</i> |
| POLLE15618   | <i>Bombus</i> | <i>Bombus pascuorum</i> |
| POLLE156319  | <i>Bombus</i> | <i>Bombus pascuorum</i> |
| POLLE164219  | <i>Bombus</i> | <i>Bombus pascuorum</i> |
| POLLE165619  | <i>Bombus</i> | <i>Bombus pascuorum</i> |
| POLLE186619  | <i>Bombus</i> | <i>Bombus pascuorum</i> |
| POLLE188719  | <i>Bombus</i> | <i>Bombus pascuorum</i> |
| POLLE19718   | <i>Bombus</i> | <i>Bombus pascuorum</i> |
| POLLE201219  | <i>Bombus</i> | <i>Bombus pascuorum</i> |
| POLLE211519  | <i>Bombus</i> | <i>Bombus pascuorum</i> |
| POLLE21218   | <i>Bombus</i> | <i>Bombus pascuorum</i> |
| POLLE225319  | <i>Bombus</i> | <i>Bombus pascuorum</i> |
| POLLE227319  | <i>Bombus</i> | <i>Bombus pascuorum</i> |
| POLLE227619  | <i>Bombus</i> | <i>Bombus pascuorum</i> |
| POLLE230219  | <i>Bombus</i> | <i>Bombus pascuorum</i> |
| POLLE233519  | <i>Bombus</i> | <i>Bombus pascuorum</i> |
| POLLE233719  | <i>Bombus</i> | <i>Bombus pascuorum</i> |
| POLLE235319  | <i>Bombus</i> | <i>Bombus pascuorum</i> |
| POLLE235419  | <i>Bombus</i> | <i>Bombus pascuorum</i> |
| POLLE235819  | <i>Bombus</i> | <i>Bombus pascuorum</i> |
| POLLE240819  | <i>Bombus</i> | <i>Bombus pascuorum</i> |

|             |               |                         |
|-------------|---------------|-------------------------|
| POLLE241719 | <i>Bombus</i> | <i>Bombus pascuorum</i> |
| POLLE242819 | <i>Bombus</i> | <i>Bombus pascuorum</i> |
| POLLE245619 | <i>Bombus</i> | <i>Bombus pascuorum</i> |
| POLLE245819 | <i>Bombus</i> | <i>Bombus pascuorum</i> |
| POLLE246019 | <i>Bombus</i> | <i>Bombus pascuorum</i> |
| POLLE246119 | <i>Bombus</i> | <i>Bombus pascuorum</i> |
| POLLE246219 | <i>Bombus</i> | <i>Bombus pascuorum</i> |
| POLLE246419 | <i>Bombus</i> | <i>Bombus pascuorum</i> |
| POLLE246519 | <i>Bombus</i> | <i>Bombus pascuorum</i> |
| POLLE246719 | <i>Bombus</i> | <i>Bombus pascuorum</i> |
| POLLE246819 | <i>Bombus</i> | <i>Bombus pascuorum</i> |
| POLLE247519 | <i>Bombus</i> | <i>Bombus pascuorum</i> |
| POLLE255819 | <i>Bombus</i> | <i>Bombus pascuorum</i> |
| POLLE265219 | <i>Bombus</i> | <i>Bombus pascuorum</i> |
| POLLE266019 | <i>Bombus</i> | <i>Bombus pascuorum</i> |
| POLLE267519 | <i>Bombus</i> | <i>Bombus pascuorum</i> |
| POLLE268019 | <i>Bombus</i> | <i>Bombus pascuorum</i> |
| POLLE268119 | <i>Bombus</i> | <i>Bombus pascuorum</i> |
| POLLE268419 | <i>Bombus</i> | <i>Bombus pascuorum</i> |
| POLLE268519 | <i>Bombus</i> | <i>Bombus pascuorum</i> |
| POLLE269019 | <i>Bombus</i> | <i>Bombus pascuorum</i> |
| POLLE269119 | <i>Bombus</i> | <i>Bombus pascuorum</i> |
| POLLE269719 | <i>Bombus</i> | <i>Bombus pascuorum</i> |
| POLLE270719 | <i>Bombus</i> | <i>Bombus pascuorum</i> |
| POLLE270819 | <i>Bombus</i> | <i>Bombus pascuorum</i> |
| POLLE271119 | <i>Bombus</i> | <i>Bombus pascuorum</i> |
| POLLE271419 | <i>Bombus</i> | <i>Bombus pascuorum</i> |
| POLLE272019 | <i>Bombus</i> | <i>Bombus pascuorum</i> |
| POLLE272219 | <i>Bombus</i> | <i>Bombus pascuorum</i> |
| POLLE272319 | <i>Bombus</i> | <i>Bombus pascuorum</i> |
| POLLE272719 | <i>Bombus</i> | <i>Bombus pascuorum</i> |
| POLLE273119 | <i>Bombus</i> | <i>Bombus pascuorum</i> |
| POLLE273219 | <i>Bombus</i> | <i>Bombus pascuorum</i> |
| POLLE273719 | <i>Bombus</i> | <i>Bombus pascuorum</i> |
| POLLE274019 | <i>Bombus</i> | <i>Bombus pascuorum</i> |
| POLLE274319 | <i>Bombus</i> | <i>Bombus pascuorum</i> |
| POLLE275019 | <i>Bombus</i> | <i>Bombus pascuorum</i> |
| POLLE275119 | <i>Bombus</i> | <i>Bombus pascuorum</i> |
| POLLE275319 | <i>Bombus</i> | <i>Bombus pascuorum</i> |
| POLLE275419 | <i>Bombus</i> | <i>Bombus pascuorum</i> |
| POLLE275519 | <i>Bombus</i> | <i>Bombus pascuorum</i> |
| POLLE275819 | <i>Bombus</i> | <i>Bombus pascuorum</i> |
| POLLE276319 | <i>Bombus</i> | <i>Bombus pascuorum</i> |
| POLLE277019 | <i>Bombus</i> | <i>Bombus pascuorum</i> |
| POLLE277819 | <i>Bombus</i> | <i>Bombus pascuorum</i> |
| POLLE278919 | <i>Bombus</i> | <i>Bombus pascuorum</i> |

|             |               |                          |
|-------------|---------------|--------------------------|
| POLLE279519 | <i>Bombus</i> | <i>Bombus pascuorum</i>  |
| POLLE279619 | <i>Bombus</i> | <i>Bombus pascuorum</i>  |
| POLLE283719 | <i>Bombus</i> | <i>Bombus pascuorum</i>  |
| POLLE286019 | <i>Bombus</i> | <i>Bombus pascuorum</i>  |
| POLLE286419 | <i>Bombus</i> | <i>Bombus pascuorum</i>  |
| POLLE286619 | <i>Bombus</i> | <i>Bombus pascuorum</i>  |
| POLLE287119 | <i>Bombus</i> | <i>Bombus pascuorum</i>  |
| POLLE287719 | <i>Bombus</i> | <i>Bombus pascuorum</i>  |
| POLLE287919 | <i>Bombus</i> | <i>Bombus pascuorum</i>  |
| POLLE289119 | <i>Bombus</i> | <i>Bombus pascuorum</i>  |
| POLLE290619 | <i>Bombus</i> | <i>Bombus pascuorum</i>  |
| POLLE291219 | <i>Bombus</i> | <i>Bombus pascuorum</i>  |
| POLLE294519 | <i>Bombus</i> | <i>Bombus pascuorum</i>  |
| POLLE300819 | <i>Bombus</i> | <i>Bombus pascuorum</i>  |
| POLLE314819 | <i>Bombus</i> | <i>Bombus pascuorum</i>  |
| POLLE318119 | <i>Bombus</i> | <i>Bombus pascuorum</i>  |
| POLLE323619 | <i>Bombus</i> | <i>Bombus pascuorum</i>  |
| POLLE335619 | <i>Bombus</i> | <i>Bombus pascuorum</i>  |
| POLLE335719 | <i>Bombus</i> | <i>Bombus pascuorum</i>  |
| POLLE345919 | <i>Bombus</i> | <i>Bombus pascuorum</i>  |
| POLLE346119 | <i>Bombus</i> | <i>Bombus pascuorum</i>  |
| POLLE348919 | <i>Bombus</i> | <i>Bombus pascuorum</i>  |
| POLLE350019 | <i>Bombus</i> | <i>Bombus pascuorum</i>  |
| POLLE35019  | <i>Bombus</i> | <i>Bombus pascuorum</i>  |
| POLLE350419 | <i>Bombus</i> | <i>Bombus pascuorum</i>  |
| POLLE353719 | <i>Bombus</i> | <i>Bombus pascuorum</i>  |
| POLLE42319  | <i>Bombus</i> | <i>Bombus pascuorum</i>  |
| POLLE52919  | <i>Bombus</i> | <i>Bombus pascuorum</i>  |
| POLLE65919  | <i>Bombus</i> | <i>Bombus pascuorum</i>  |
| POLLE76219  | <i>Bombus</i> | <i>Bombus pascuorum</i>  |
| POLLE89419  | <i>Bombus</i> | <i>Bombus pascuorum</i>  |
| POLLE90819  | <i>Bombus</i> | <i>Bombus pascuorum</i>  |
| POLLE91819  | <i>Bombus</i> | <i>Bombus pascuorum</i>  |
| POLLE93419  | <i>Bombus</i> | <i>Bombus pascuorum</i>  |
| BBBO01310   | <i>Bombus</i> | <i>Bombus patagiatus</i> |
| BBBO01410   | <i>Bombus</i> | <i>Bombus patagiatus</i> |
| BBBO01510   | <i>Bombus</i> | <i>Bombus patagiatus</i> |
| BBBO01610   | <i>Bombus</i> | <i>Bombus patagiatus</i> |
| BBBO04510   | <i>Bombus</i> | <i>Bombus patagiatus</i> |
| BBBO04910   | <i>Bombus</i> | <i>Bombus patagiatus</i> |
| BBBO11210   | <i>Bombus</i> | <i>Bombus patagiatus</i> |
| BBBO11310   | <i>Bombus</i> | <i>Bombus patagiatus</i> |
| BBBO11410   | <i>Bombus</i> | <i>Bombus patagiatus</i> |
| BBBO12210   | <i>Bombus</i> | <i>Bombus patagiatus</i> |
| BBBO12310   | <i>Bombus</i> | <i>Bombus patagiatus</i> |
| BBBO12410   | <i>Bombus</i> | <i>Bombus patagiatus</i> |

|              |               |                          |                       |
|--------------|---------------|--------------------------|-----------------------|
| BBBO12510    | <i>Bombus</i> | <i>Bombus patagiatus</i> |                       |
| BBBO12610    | <i>Bombus</i> | <i>Bombus patagiatus</i> |                       |
| BBBO12710    | <i>Bombus</i> | <i>Bombus patagiatus</i> |                       |
| BBBO17310    | <i>Bombus</i> | <i>Bombus patagiatus</i> |                       |
| BBBO17410    | <i>Bombus</i> | <i>Bombus patagiatus</i> |                       |
| BBBO17510    | <i>Bombus</i> | <i>Bombus patagiatus</i> |                       |
| BBBO17610    | <i>Bombus</i> | <i>Bombus patagiatus</i> |                       |
| BBBO23010    | <i>Bombus</i> | <i>Bombus patagiatus</i> |                       |
| BBBO23110    | <i>Bombus</i> | <i>Bombus patagiatus</i> |                       |
| BBBO23310    | <i>Bombus</i> | <i>Bombus patagiatus</i> |                       |
| BBBO23510    | <i>Bombus</i> | <i>Bombus patagiatus</i> |                       |
| BBBO23610    | <i>Bombus</i> | <i>Bombus patagiatus</i> |                       |
| BBBO23810    | <i>Bombus</i> | <i>Bombus patagiatus</i> |                       |
| BBBO26810    | <i>Bombus</i> | <i>Bombus patagiatus</i> |                       |
| BBBO26910    | <i>Bombus</i> | <i>Bombus patagiatus</i> |                       |
| BBBO27410    | <i>Bombus</i> | <i>Bombus patagiatus</i> |                       |
| BBBO27810    | <i>Bombus</i> | <i>Bombus patagiatus</i> |                       |
| BBBO27910    | <i>Bombus</i> | <i>Bombus patagiatus</i> |                       |
| BBBO28010    | <i>Bombus</i> | <i>Bombus patagiatus</i> |                       |
| BBBO28210    | <i>Bombus</i> | <i>Bombus patagiatus</i> |                       |
| BBBO28610    | <i>Bombus</i> | <i>Bombus patagiatus</i> |                       |
| BBBO28710    | <i>Bombus</i> | <i>Bombus patagiatus</i> |                       |
| BBBO28810    | <i>Bombus</i> | <i>Bombus patagiatus</i> |                       |
| BBBO28910    | <i>Bombus</i> | <i>Bombus patagiatus</i> |                       |
| BBBO29410    | <i>Bombus</i> | <i>Bombus patagiatus</i> |                       |
| BBBO29610    | <i>Bombus</i> | <i>Bombus patagiatus</i> |                       |
| BOBO00312    | <i>Bombus</i> | <i>Bombus patagiatus</i> |                       |
| GBAH031706   | <i>Bombus</i> | <i>Bombus patagiatus</i> |                       |
| GBAH031806   | <i>Bombus</i> | <i>Bombus patagiatus</i> |                       |
| GBMIN7274317 | <i>Bombus</i> | <i>Bombus patagiatus</i> |                       |
| ASBEE01208   | <i>Bombus</i> | <i>Bombus pauloensis</i> | <i>Bombus atratus</i> |
| ASBEE01908   | <i>Bombus</i> | <i>Bombus pauloensis</i> | <i>Bombus atratus</i> |
| ASBEE02008   | <i>Bombus</i> | <i>Bombus pauloensis</i> | <i>Bombus atratus</i> |
| ASBEE02108   | <i>Bombus</i> | <i>Bombus pauloensis</i> | <i>Bombus atratus</i> |
| ASBEE02208   | <i>Bombus</i> | <i>Bombus pauloensis</i> | <i>Bombus atratus</i> |
| ASBEE02308   | <i>Bombus</i> | <i>Bombus pauloensis</i> | <i>Bombus atratus</i> |
| ASBEE02408   | <i>Bombus</i> | <i>Bombus pauloensis</i> | <i>Bombus atratus</i> |
| ASBEE02508   | <i>Bombus</i> | <i>Bombus pauloensis</i> | <i>Bombus atratus</i> |
| ASBEE11008   | <i>Bombus</i> | <i>Bombus pauloensis</i> | <i>Bombus atratus</i> |
| ASBEE11308   | <i>Bombus</i> | <i>Bombus pauloensis</i> | <i>Bombus atratus</i> |
| ASBEE11408   | <i>Bombus</i> | <i>Bombus pauloensis</i> | <i>Bombus atratus</i> |
| ASBEE11508   | <i>Bombus</i> | <i>Bombus pauloensis</i> | <i>Bombus atratus</i> |
| ASBEE11608   | <i>Bombus</i> | <i>Bombus pauloensis</i> | <i>Bombus atratus</i> |
| ASBEE11708   | <i>Bombus</i> | <i>Bombus pauloensis</i> | <i>Bombus atratus</i> |
| ASBEE11808   | <i>Bombus</i> | <i>Bombus pauloensis</i> | <i>Bombus atratus</i> |
| ASBEE11908   | <i>Bombus</i> | <i>Bombus pauloensis</i> | <i>Bombus atratus</i> |

|              |               |                             |                       |
|--------------|---------------|-----------------------------|-----------------------|
| GBAH1092715  | <i>Bombus</i> | <i>Bombus pauloensis</i>    |                       |
| GBAH1092815  | <i>Bombus</i> | <i>Bombus pauloensis</i>    |                       |
| GBAH1092915  | <i>Bombus</i> | <i>Bombus pauloensis</i>    |                       |
| GBAH1093015  | <i>Bombus</i> | <i>Bombus pauloensis</i>    |                       |
| GBAH1093115  | <i>Bombus</i> | <i>Bombus pauloensis</i>    |                       |
| GBAH1093215  | <i>Bombus</i> | <i>Bombus pauloensis</i>    |                       |
| GBAH1093315  | <i>Bombus</i> | <i>Bombus pauloensis</i>    |                       |
| GBAH1654819  | <i>Bombus</i> | <i>Bombus pauloensis</i>    |                       |
| GBAH1654919  | <i>Bombus</i> | <i>Bombus pauloensis</i>    |                       |
| GBAH1655019  | <i>Bombus</i> | <i>Bombus pauloensis</i>    |                       |
| GBAH1655119  | <i>Bombus</i> | <i>Bombus pauloensis</i>    |                       |
| GBAH1655219  | <i>Bombus</i> | <i>Bombus pauloensis</i>    |                       |
| GBHAP46714   | <i>Bombus</i> | <i>Bombus pauloensis</i>    |                       |
| GBHAP46814   | <i>Bombus</i> | <i>Bombus pauloensis</i>    |                       |
| GBHAP46914   | <i>Bombus</i> | <i>Bombus pauloensis</i>    |                       |
| GBHAP47014   | <i>Bombus</i> | <i>Bombus pauloensis</i>    |                       |
| GBHAP47114   | <i>Bombus</i> | <i>Bombus pauloensis</i>    |                       |
| LASNA33508   | <i>Bombus</i> | <i>Bombus pauloensis</i>    | <i>Bombus atratus</i> |
| LASNA35508   | <i>Bombus</i> | <i>Bombus pauloensis</i>    | <i>Bombus atratus</i> |
| LASNA42908   | <i>Bombus</i> | <i>Bombus pauloensis</i>    | <i>Bombus atratus</i> |
| LASNA44808   | <i>Bombus</i> | <i>Bombus pauloensis</i>    | <i>Bombus atratus</i> |
| LASNA44908   | <i>Bombus</i> | <i>Bombus pauloensis</i>    | <i>Bombus atratus</i> |
| BBHYA06912   | <i>Bombus</i> | <i>Bombus pensylvanicus</i> |                       |
| BBHYA07012   | <i>Bombus</i> | <i>Bombus pensylvanicus</i> |                       |
| BBHYA08712   | <i>Bombus</i> | <i>Bombus pensylvanicus</i> |                       |
| BEECC44408   | <i>Bombus</i> | <i>Bombus pensylvanicus</i> |                       |
| GBHAP55214   | <i>Bombus</i> | <i>Bombus pensylvanicus</i> |                       |
| GBMNB6120320 | <i>Bombus</i> | <i>Bombus pensylvanicus</i> | <i>Bombus sonorus</i> |
| GBMNB6146320 | <i>Bombus</i> | <i>Bombus pensylvanicus</i> |                       |
| GBMNB6299620 | <i>Bombus</i> | <i>Bombus pensylvanicus</i> | <i>Bombus sonorus</i> |
| GBMNB6299720 | <i>Bombus</i> | <i>Bombus pensylvanicus</i> | <i>Bombus sonorus</i> |
| ASGLE159310  | <i>Bombus</i> | <i>Bombus perplexus</i>     |                       |
| ASGLE76310   | <i>Bombus</i> | <i>Bombus perplexus</i>     |                       |
| BBHEC14609   | <i>Bombus</i> | <i>Bombus perplexus</i>     |                       |
| BBHEC14709   | <i>Bombus</i> | <i>Bombus perplexus</i>     |                       |
| BBHEC14809   | <i>Bombus</i> | <i>Bombus perplexus</i>     |                       |
| BBHEC17709   | <i>Bombus</i> | <i>Bombus perplexus</i>     |                       |
| BBHYL28010   | <i>Bombus</i> | <i>Bombus perplexus</i>     |                       |
| BBHYL28110   | <i>Bombus</i> | <i>Bombus perplexus</i>     |                       |
| BEECA41406   | <i>Bombus</i> | <i>Bombus perplexus</i>     |                       |
| BEEMH11206   | <i>Bombus</i> | <i>Bombus perplexus</i>     |                       |
| BEEMH24606   | <i>Bombus</i> | <i>Bombus perplexus</i>     |                       |
| BEO01304     | <i>Bombus</i> | <i>Bombus perplexus</i>     |                       |
| BEO01504     | <i>Bombus</i> | <i>Bombus perplexus</i>     |                       |
| CNFDO90214   | <i>Bombus</i> | <i>Bombus perplexus</i>     |                       |
| CNFNF239114  | <i>Bombus</i> | <i>Bombus perplexus</i>     |                       |

|             |               |                          |
|-------------|---------------|--------------------------|
| CNFNF270914 | <i>Bombus</i> | <i>Bombus perplexus</i>  |
| CNFNF274614 | <i>Bombus</i> | <i>Bombus perplexus</i>  |
| CNFNF275314 | <i>Bombus</i> | <i>Bombus perplexus</i>  |
| CNFNR198514 | <i>Bombus</i> | <i>Bombus perplexus</i>  |
| CNKJN18214  | <i>Bombus</i> | <i>Bombus perplexus</i>  |
| CNKOF170714 | <i>Bombus</i> | <i>Bombus perplexus</i>  |
| CNKOP78614  | <i>Bombus</i> | <i>Bombus perplexus</i>  |
| CNKOQ05514  | <i>Bombus</i> | <i>Bombus perplexus</i>  |
| CNLMP204814 | <i>Bombus</i> | <i>Bombus perplexus</i>  |
| CNPED13114  | <i>Bombus</i> | <i>Bombus perplexus</i>  |
| CNRVE188615 | <i>Bombus</i> | <i>Bombus perplexus</i>  |
| GMORG09719  | <i>Bombus</i> | <i>Bombus perplexus</i>  |
| GMORK02415  | <i>Bombus</i> | <i>Bombus perplexus</i>  |
| HCBNS10703  | <i>Bombus</i> | <i>Bombus perplexus</i>  |
| HCBNS10803  | <i>Bombus</i> | <i>Bombus perplexus</i>  |
| HCBNS10903  | <i>Bombus</i> | <i>Bombus perplexus</i>  |
| HGPPH02110  | <i>Bombus</i> | <i>Bombus perplexus</i>  |
| HPPPA55613  | <i>Bombus</i> | <i>Bombus perplexus</i>  |
| HPPPB11113  | <i>Bombus</i> | <i>Bombus perplexus</i>  |
| HPPPD175113 | <i>Bombus</i> | <i>Bombus perplexus</i>  |
| HPPPF105413 | <i>Bombus</i> | <i>Bombus perplexus</i>  |
| HPPPF105713 | <i>Bombus</i> | <i>Bombus perplexus</i>  |
| HPPPG47013  | <i>Bombus</i> | <i>Bombus perplexus</i>  |
| HPPPH93413  | <i>Bombus</i> | <i>Bombus perplexus</i>  |
| HPPPK112613 | <i>Bombus</i> | <i>Bombus perplexus</i>  |
| ICHC06108   | <i>Bombus</i> | <i>Bombus perplexus</i>  |
| OPPDE304317 | <i>Bombus</i> | <i>Bombus perplexus</i>  |
| OPPFE00117  | <i>Bombus</i> | <i>Bombus perplexus</i>  |
| OPPHE23417  | <i>Bombus</i> | <i>Bombus perplexus</i>  |
| OPPUO74917  | <i>Bombus</i> | <i>Bombus perplexus</i>  |
| SMTPL606615 | <i>Bombus</i> | <i>Bombus perplexus</i>  |
| SSFDC235514 | <i>Bombus</i> | <i>Bombus perplexus</i>  |
| SSKJC83015  | <i>Bombus</i> | <i>Bombus perplexus</i>  |
| TTHYW59308  | <i>Bombus</i> | <i>Bombus perplexus</i>  |
| TTHYW59408  | <i>Bombus</i> | <i>Bombus perplexus</i>  |
| TTHYW59508  | <i>Bombus</i> | <i>Bombus perplexus</i>  |
| TTHYW61608  | <i>Bombus</i> | <i>Bombus perplexus</i>  |
| TTHYW67608  | <i>Bombus</i> | <i>Bombus perplexus</i>  |
| UAMIC74113  | <i>Bombus</i> | <i>Bombus perplexus</i>  |
| UAMIC74213  | <i>Bombus</i> | <i>Bombus perplexus</i>  |
| GBAH1835919 | <i>Bombus</i> | <i>Bombus persicus</i>   |
| GBAH1836019 | <i>Bombus</i> | <i>Bombus persicus</i>   |
| GBAH1836119 | <i>Bombus</i> | <i>Bombus persicus</i>   |
| BBBO31210   | <i>Bombus</i> | <i>Bombus personatus</i> |
| BBBO31310   | <i>Bombus</i> | <i>Bombus personatus</i> |
| BBBO31410   | <i>Bombus</i> | <i>Bombus personatus</i> |

|              |               |                          |
|--------------|---------------|--------------------------|
| BBBO31510    | <i>Bombus</i> | <i>Bombus personatus</i> |
| BBBO31610    | <i>Bombus</i> | <i>Bombus personatus</i> |
| BBWP00109    | <i>Bombus</i> | <i>Bombus personatus</i> |
| BBWP00209    | <i>Bombus</i> | <i>Bombus personatus</i> |
| BBWP00309    | <i>Bombus</i> | <i>Bombus personatus</i> |
| BBWP00409    | <i>Bombus</i> | <i>Bombus personatus</i> |
| BBWP01809    | <i>Bombus</i> | <i>Bombus personatus</i> |
| BBWP01909    | <i>Bombus</i> | <i>Bombus personatus</i> |
| BBWP02009    | <i>Bombus</i> | <i>Bombus personatus</i> |
| BBWP02109    | <i>Bombus</i> | <i>Bombus personatus</i> |
| GBMIN7274417 | <i>Bombus</i> | <i>Bombus personatus</i> |
| ASBEE05108   | <i>Bombus</i> | <i>Bombus picipes</i>    |
| ASBEE05208   | <i>Bombus</i> | <i>Bombus picipes</i>    |
| ASBEE05308   | <i>Bombus</i> | <i>Bombus picipes</i>    |
| ASBEE05408   | <i>Bombus</i> | <i>Bombus picipes</i>    |
| ASBEE05508   | <i>Bombus</i> | <i>Bombus picipes</i>    |
| ASBEE05608   | <i>Bombus</i> | <i>Bombus picipes</i>    |
| ASBEE14508   | <i>Bombus</i> | <i>Bombus picipes</i>    |
| ASBEE14608   | <i>Bombus</i> | <i>Bombus picipes</i>    |
| ASBEE14708   | <i>Bombus</i> | <i>Bombus picipes</i>    |
| ASBEE14808   | <i>Bombus</i> | <i>Bombus picipes</i>    |
| ASBEE14908   | <i>Bombus</i> | <i>Bombus picipes</i>    |
| ASBEE15008   | <i>Bombus</i> | <i>Bombus picipes</i>    |
| ACHAR21218   | <i>Bombus</i> | <i>Bombus polaris</i>    |
| ACHAR21318   | <i>Bombus</i> | <i>Bombus polaris</i>    |
| ACHAR21718   | <i>Bombus</i> | <i>Bombus polaris</i>    |
| ACHAR348319  | <i>Bombus</i> | <i>Bombus polaris</i>    |
| BBWP60812    | <i>Bombus</i> | <i>Bombus polaris</i>    |
| BBWP61112    | <i>Bombus</i> | <i>Bombus polaris</i>    |
| BBWP61212    | <i>Bombus</i> | <i>Bombus polaris</i>    |
| BEECF59811   | <i>Bombus</i> | <i>Bombus polaris</i>    |
| BEECF85712   | <i>Bombus</i> | <i>Bombus polaris</i>    |
| BWTWO127210  | <i>Bombus</i> | <i>Bombus polaris</i>    |
| CNWAH636515  | <i>Bombus</i> | <i>Bombus polaris</i>    |
| FCHAR487519  | <i>Bombus</i> | <i>Bombus polaris</i>    |
| GBAH030006   | <i>Bombus</i> | <i>Bombus polaris</i>    |
| GBAH070806   | <i>Bombus</i> | <i>Bombus polaris</i>    |
| GBHAP77214   | <i>Bombus</i> | <i>Bombus polaris</i>    |
| GRAFW310114  | <i>Bombus</i> | <i>Bombus polaris</i>    |
| GRAFW310214  | <i>Bombus</i> | <i>Bombus polaris</i>    |
| GRAFW310314  | <i>Bombus</i> | <i>Bombus polaris</i>    |
| MAGIG08715   | <i>Bombus</i> | <i>Bombus polaris</i>    |
| MAGIG08815   | <i>Bombus</i> | <i>Bombus polaris</i>    |
| MAGIG08915   | <i>Bombus</i> | <i>Bombus polaris</i>    |
| MAGIG09015   | <i>Bombus</i> | <i>Bombus polaris</i>    |
| MAGIG09115   | <i>Bombus</i> | <i>Bombus polaris</i>    |

|             |               |                           |                           |
|-------------|---------------|---------------------------|---------------------------|
| MAGIG09215  | <i>Bombus</i> | <i>Bombus polaris</i>     |                           |
| MAGIG09315  | <i>Bombus</i> | <i>Bombus polaris</i>     |                           |
| MAGIG09415  | <i>Bombus</i> | <i>Bombus polaris</i>     |                           |
| MAGIG09515  | <i>Bombus</i> | <i>Bombus polaris</i>     |                           |
| MHBEE03907  | <i>Bombus</i> | <i>Bombus polaris</i>     |                           |
| MHBEE04907  | <i>Bombus</i> | <i>Bombus polaris</i>     |                           |
| MHBEE05007  | <i>Bombus</i> | <i>Bombus polaris</i>     |                           |
| MHBEE05607  | <i>Bombus</i> | <i>Bombus polaris</i>     |                           |
| MHBEE05807  | <i>Bombus</i> | <i>Bombus polaris</i>     |                           |
| MHBEE07307  | <i>Bombus</i> | <i>Bombus polaris</i>     |                           |
| MHBEE07707  | <i>Bombus</i> | <i>Bombus polaris</i>     |                           |
| MHBEE08007  | <i>Bombus</i> | <i>Bombus polaris</i>     |                           |
| MHBEE09107  | <i>Bombus</i> | <i>Bombus polaris</i>     |                           |
| NOAPI56314  | <i>Bombus</i> | <i>Bombus polaris</i>     | <i>Bombus pyrrhopygus</i> |
| NOAPI64114  | <i>Bombus</i> | <i>Bombus polaris</i>     | <i>Bombus pyrrhopygus</i> |
| WASPS40314  | <i>Bombus</i> | <i>Bombus polaris</i>     | <i>Bombus pyrrhopygus</i> |
| WASPS44614  | <i>Bombus</i> | <i>Bombus polaris</i>     | <i>Bombus pyrrhopygus</i> |
| WASPS45614  | <i>Bombus</i> | <i>Bombus polaris</i>     | <i>Bombus pyrrhopygus</i> |
| WASPS46614  | <i>Bombus</i> | <i>Bombus polaris</i>     | <i>Bombus pyrrhopygus</i> |
| WASPS46714  | <i>Bombus</i> | <i>Bombus polaris</i>     | <i>Bombus pyrrhopygus</i> |
| WASPS47114  | <i>Bombus</i> | <i>Bombus polaris</i>     | <i>Bombus pyrrhopygus</i> |
| WASPS71016  | <i>Bombus</i> | <i>Bombus polaris</i>     |                           |
| WASPS84616  | <i>Bombus</i> | <i>Bombus polaris</i>     |                           |
| WASPS84816  | <i>Bombus</i> | <i>Bombus polaris</i>     |                           |
| WASPS85016  | <i>Bombus</i> | <i>Bombus polaris</i>     |                           |
| WASPS85116  | <i>Bombus</i> | <i>Bombus polaris</i>     |                           |
| WASPS85616  | <i>Bombus</i> | <i>Bombus polaris</i>     |                           |
| GBAH1093415 | <i>Bombus</i> | <i>Bombus portchinsky</i> |                           |
| GBAH1093515 | <i>Bombus</i> | <i>Bombus portchinsky</i> |                           |
| BEEEE12015  | <i>Bombus</i> | <i>Bombus pratorum</i>    |                           |
| BEEEE26816  | <i>Bombus</i> | <i>Bombus pratorum</i>    |                           |
| BEEEE28616  | <i>Bombus</i> | <i>Bombus pratorum</i>    |                           |
| FBHAP82409  | <i>Bombus</i> | <i>Bombus pratorum</i>    |                           |
| FBHAP82709  | <i>Bombus</i> | <i>Bombus pratorum</i>    |                           |
| GBAH070906  | <i>Bombus</i> | <i>Bombus pratorum</i>    |                           |
| GBAH071006  | <i>Bombus</i> | <i>Bombus pratorum</i>    |                           |
| GBAH071106  | <i>Bombus</i> | <i>Bombus pratorum</i>    |                           |
| GBAH071206  | <i>Bombus</i> | <i>Bombus pratorum</i>    |                           |
| GBAH071306  | <i>Bombus</i> | <i>Bombus pratorum</i>    |                           |
| GBAH1741619 | <i>Bombus</i> | <i>Bombus pratorum</i>    |                           |
| GBAH1836219 | <i>Bombus</i> | <i>Bombus pratorum</i>    |                           |
| GBCHA59313  | <i>Bombus</i> | <i>Bombus pratorum</i>    |                           |
| GBCHA59413  | <i>Bombus</i> | <i>Bombus pratorum</i>    |                           |
| GBCHA59513  | <i>Bombus</i> | <i>Bombus pratorum</i>    |                           |
| GBMAB78715  | <i>Bombus</i> | <i>Bombus pratorum</i>    |                           |
| GBMAB78915  | <i>Bombus</i> | <i>Bombus pratorum</i>    |                           |



|              |               |                        |
|--------------|---------------|------------------------|
| GBMAB79015   | <i>Bombus</i> | <i>Bombus pratorum</i> |
| GBMAB79215   | <i>Bombus</i> | <i>Bombus pratorum</i> |
| GBMAB79415   | <i>Bombus</i> | <i>Bombus pratorum</i> |
| GBMAB79615   | <i>Bombus</i> | <i>Bombus pratorum</i> |
| GBMAB79815   | <i>Bombus</i> | <i>Bombus pratorum</i> |
| GBMNB6226020 | <i>Bombus</i> | <i>Bombus pratorum</i> |
| GMFIC37612   | <i>Bombus</i> | <i>Bombus pratorum</i> |
| GMFIF68612   | <i>Bombus</i> | <i>Bombus pratorum</i> |
| GMFIO89413   | <i>Bombus</i> | <i>Bombus pratorum</i> |
| GMGMC21414   | <i>Bombus</i> | <i>Bombus pratorum</i> |
| GMGMC21714   | <i>Bombus</i> | <i>Bombus pratorum</i> |
| GMGMI03614   | <i>Bombus</i> | <i>Bombus pratorum</i> |
| GMGMI03814   | <i>Bombus</i> | <i>Bombus pratorum</i> |
| GMGMI05914   | <i>Bombus</i> | <i>Bombus pratorum</i> |
| GMGMJ06414   | <i>Bombus</i> | <i>Bombus pratorum</i> |
| GMGMJ06514   | <i>Bombus</i> | <i>Bombus pratorum</i> |
| GMGMJ07114   | <i>Bombus</i> | <i>Bombus pratorum</i> |
| GMGMJ07314   | <i>Bombus</i> | <i>Bombus pratorum</i> |
| GMGMJ07914   | <i>Bombus</i> | <i>Bombus pratorum</i> |
| GMGMJ10314   | <i>Bombus</i> | <i>Bombus pratorum</i> |
| GMGMK11014   | <i>Bombus</i> | <i>Bombus pratorum</i> |
| GMGMK17114   | <i>Bombus</i> | <i>Bombus pratorum</i> |
| GMGML10114   | <i>Bombus</i> | <i>Bombus pratorum</i> |
| GMGML10714   | <i>Bombus</i> | <i>Bombus pratorum</i> |
| GMGML10914   | <i>Bombus</i> | <i>Bombus pratorum</i> |
| GMGML15114   | <i>Bombus</i> | <i>Bombus pratorum</i> |
| GMGRA166513  | <i>Bombus</i> | <i>Bombus pratorum</i> |
| GMGRA166613  | <i>Bombus</i> | <i>Bombus pratorum</i> |
| GMGRC304913  | <i>Bombus</i> | <i>Bombus pratorum</i> |
| GMGRD361513  | <i>Bombus</i> | <i>Bombus pratorum</i> |
| GMGRD361613  | <i>Bombus</i> | <i>Bombus pratorum</i> |
| GMGRE248713  | <i>Bombus</i> | <i>Bombus pratorum</i> |
| POLLE122919  | <i>Bombus</i> | <i>Bombus pratorum</i> |
| POLLE130019  | <i>Bombus</i> | <i>Bombus pratorum</i> |
| POLLE164719  | <i>Bombus</i> | <i>Bombus pratorum</i> |
| POLLE184619  | <i>Bombus</i> | <i>Bombus pratorum</i> |
| POLLE213319  | <i>Bombus</i> | <i>Bombus pratorum</i> |
| POLLE215819  | <i>Bombus</i> | <i>Bombus pratorum</i> |
| POLLE225719  | <i>Bombus</i> | <i>Bombus pratorum</i> |
| POLLE226919  | <i>Bombus</i> | <i>Bombus pratorum</i> |
| POLLE265819  | <i>Bombus</i> | <i>Bombus pratorum</i> |
| POLLE268319  | <i>Bombus</i> | <i>Bombus pratorum</i> |
| POLLE270619  | <i>Bombus</i> | <i>Bombus pratorum</i> |
| POLLE271219  | <i>Bombus</i> | <i>Bombus pratorum</i> |
| POLLE271319  | <i>Bombus</i> | <i>Bombus pratorum</i> |
| POLLE274919  | <i>Bombus</i> | <i>Bombus pratorum</i> |

|              |               |                                 |                           |
|--------------|---------------|---------------------------------|---------------------------|
| POLLE42219   | <i>Bombus</i> | <i>Bombus pratorum</i>          |                           |
| POLLE54019   | <i>Bombus</i> | <i>Bombus pratorum</i>          |                           |
| POLLE62219   | <i>Bombus</i> | <i>Bombus pratorum</i>          |                           |
| POLLE63319   | <i>Bombus</i> | <i>Bombus pratorum</i>          |                           |
| POLLE71019   | <i>Bombus</i> | <i>Bombus pratorum</i>          |                           |
| POLLE71919   | <i>Bombus</i> | <i>Bombus pratorum</i>          |                           |
| POLLE77019   | <i>Bombus</i> | <i>Bombus pratorum</i>          |                           |
| POLLE82719   | <i>Bombus</i> | <i>Bombus pratorum</i>          |                           |
| POLLE82819   | <i>Bombus</i> | <i>Bombus pratorum</i>          |                           |
| POLLE86119   | <i>Bombus</i> | <i>Bombus pratorum</i>          |                           |
| POLLE91419   | <i>Bombus</i> | <i>Bombus pratorum</i>          |                           |
| GBAH038006   | <i>Bombus</i> | <i>Bombus pseudobaicalensis</i> |                           |
| GBAH038106   | <i>Bombus</i> | <i>Bombus pseudobaicalensis</i> |                           |
| GBAH038206   | <i>Bombus</i> | <i>Bombus pseudobaicalensis</i> |                           |
| GBAH038306   | <i>Bombus</i> | <i>Bombus pseudobaicalensis</i> |                           |
| ASINH03712   | <i>Bombus</i> | <i>Bombus pullatus</i>          |                           |
| ASINH03812   | <i>Bombus</i> | <i>Bombus pullatus</i>          |                           |
| ASINH04012   | <i>Bombus</i> | <i>Bombus pullatus</i>          |                           |
| ASINH04112   | <i>Bombus</i> | <i>Bombus pullatus</i>          |                           |
| ASINH04212   | <i>Bombus</i> | <i>Bombus pullatus</i>          |                           |
| ASINH04312   | <i>Bombus</i> | <i>Bombus pullatus</i>          |                           |
| ASINH04412   | <i>Bombus</i> | <i>Bombus pullatus</i>          |                           |
| ASINH04512   | <i>Bombus</i> | <i>Bombus pullatus</i>          |                           |
| ASINH05612   | <i>Bombus</i> | <i>Bombus pullatus</i>          |                           |
| GBMNB6115620 | <i>Bombus</i> | <i>Bombus pullatus</i>          |                           |
| GBMNB6116020 | <i>Bombus</i> | <i>Bombus pullatus</i>          |                           |
| FBHAP82809   | <i>Bombus</i> | <i>Bombus pyrenaeus</i>         |                           |
| FBHAP82909   | <i>Bombus</i> | <i>Bombus pyrenaeus</i>         |                           |
| FBHAP83009   | <i>Bombus</i> | <i>Bombus pyrenaeus</i>         |                           |
| GBACU119812  | <i>Bombus</i> | <i>Bombus pyrenaeus</i>         |                           |
| GBAH071406   | <i>Bombus</i> | <i>Bombus pyrenaeus</i>         |                           |
| GBAH071506   | <i>Bombus</i> | <i>Bombus pyrenaeus</i>         |                           |
| ASBEE05708   | <i>Bombus</i> | <i>Bombus pyrosoma</i>          |                           |
| ASBEE05808   | <i>Bombus</i> | <i>Bombus pyrosoma</i>          |                           |
| ASBEE15108   | <i>Bombus</i> | <i>Bombus pyrosoma</i>          |                           |
| ASBEE15208   | <i>Bombus</i> | <i>Bombus pyrosoma</i>          |                           |
| GBAH034106   | <i>Bombus</i> | <i>Bombus pyrosoma</i>          | <i>Bombus formosellus</i> |
| GBAH1648019  | <i>Bombus</i> | <i>Bombus pyrosoma</i>          |                           |
| GBMNA4153019 | <i>Bombus</i> | <i>Bombus pyrosoma</i>          |                           |
| FBSYM29710   | <i>Bombus</i> | <i>Bombus quadricolor</i>       |                           |
| FBSYM29810   | <i>Bombus</i> | <i>Bombus quadricolor</i>       |                           |
| FBSYM29910   | <i>Bombus</i> | <i>Bombus quadricolor</i>       |                           |
| GBAH075006   | <i>Bombus</i> | <i>Bombus quadricolor</i>       |                           |
| GBAH1093615  | <i>Bombus</i> | <i>Bombus religiosus</i>        |                           |
| GBAH1093715  | <i>Bombus</i> | <i>Bombus religiosus</i>        |                           |
| GBMIN7274517 | <i>Bombus</i> | <i>Bombus remotus</i>           |                           |

|              |               |                           |
|--------------|---------------|---------------------------|
| BCHYM148413  | <i>Bombus</i> | <i>Bombus ruderarius</i>  |
| FBHAP83109   | <i>Bombus</i> | <i>Bombus ruderarius</i>  |
| FBHAP83309   | <i>Bombus</i> | <i>Bombus ruderarius</i>  |
| GBACU230813  | <i>Bombus</i> | <i>Bombus ruderarius</i>  |
| GBAH071606   | <i>Bombus</i> | <i>Bombus ruderarius</i>  |
| GBAH071706   | <i>Bombus</i> | <i>Bombus ruderarius</i>  |
| GBAH071806   | <i>Bombus</i> | <i>Bombus ruderarius</i>  |
| GBAH071906   | <i>Bombus</i> | <i>Bombus ruderarius</i>  |
| GBMIN7274617 | <i>Bombus</i> | <i>Bombus ruderarius</i>  |
| POLLE225619  | <i>Bombus</i> | <i>Bombus ruderarius</i>  |
| BEECA94007   | <i>Bombus</i> | <i>Bombus ruderatus</i>   |
| BEEEE29416   | <i>Bombus</i> | <i>Bombus ruderatus</i>   |
| FBAPD62411   | <i>Bombus</i> | <i>Bombus ruderatus</i>   |
| GBACU147212  | <i>Bombus</i> | <i>Bombus ruderatus</i>   |
| GBAH1093815  | <i>Bombus</i> | <i>Bombus ruderatus</i>   |
| GBAH1093915  | <i>Bombus</i> | <i>Bombus ruderatus</i>   |
| GBAH1582719  | <i>Bombus</i> | <i>Bombus ruderatus</i>   |
| GBAH1583219  | <i>Bombus</i> | <i>Bombus ruderatus</i>   |
| POLLE144319  | <i>Bombus</i> | <i>Bombus ruderatus</i>   |
| ASGCB22513   | <i>Bombus</i> | <i>Bombus rufocinctus</i> |
| BBHEC13209   | <i>Bombus</i> | <i>Bombus rufocinctus</i> |
| BBHYA07912   | <i>Bombus</i> | <i>Bombus rufocinctus</i> |
| BBHYA08012   | <i>Bombus</i> | <i>Bombus rufocinctus</i> |
| BBHYA82612   | <i>Bombus</i> | <i>Bombus rufocinctus</i> |
| BBHYL22910   | <i>Bombus</i> | <i>Bombus rufocinctus</i> |
| BEECA04106   | <i>Bombus</i> | <i>Bombus rufocinctus</i> |
| BEECA32906   | <i>Bombus</i> | <i>Bombus rufocinctus</i> |
| BEECA33006   | <i>Bombus</i> | <i>Bombus rufocinctus</i> |
| BEECA33106   | <i>Bombus</i> | <i>Bombus rufocinctus</i> |
| BEECA33206   | <i>Bombus</i> | <i>Bombus rufocinctus</i> |
| BEECA33306   | <i>Bombus</i> | <i>Bombus rufocinctus</i> |
| BEECA33406   | <i>Bombus</i> | <i>Bombus rufocinctus</i> |
| BEECB61607   | <i>Bombus</i> | <i>Bombus rufocinctus</i> |
| BEECB61707   | <i>Bombus</i> | <i>Bombus rufocinctus</i> |
| BEECC46908   | <i>Bombus</i> | <i>Bombus rufocinctus</i> |
| BEECD32209   | <i>Bombus</i> | <i>Bombus rufocinctus</i> |
| BEECD43409   | <i>Bombus</i> | <i>Bombus rufocinctus</i> |
| BEECD81710   | <i>Bombus</i> | <i>Bombus rufocinctus</i> |
| BEECD81810   | <i>Bombus</i> | <i>Bombus rufocinctus</i> |
| BEEMH09006   | <i>Bombus</i> | <i>Bombus rufocinctus</i> |
| BEEMH31006   | <i>Bombus</i> | <i>Bombus rufocinctus</i> |
| CNGRF41012   | <i>Bombus</i> | <i>Bombus rufocinctus</i> |
| CNGSD729315  | <i>Bombus</i> | <i>Bombus rufocinctus</i> |
| CNGSG05315   | <i>Bombus</i> | <i>Bombus rufocinctus</i> |
| CNGSG05415   | <i>Bombus</i> | <i>Bombus rufocinctus</i> |
| CNGSG06315   | <i>Bombus</i> | <i>Bombus rufocinctus</i> |

|             |               |                           |
|-------------|---------------|---------------------------|
| CNWLG95812  | <i>Bombus</i> | <i>Bombus rufocinctus</i> |
| CNWLM16613  | <i>Bombus</i> | <i>Bombus rufocinctus</i> |
| CNWLM19413  | <i>Bombus</i> | <i>Bombus rufocinctus</i> |
| CNWLN102013 | <i>Bombus</i> | <i>Bombus rufocinctus</i> |
| CNWLN154313 | <i>Bombus</i> | <i>Bombus rufocinctus</i> |
| DIAL20806   | <i>Bombus</i> | <i>Bombus rufocinctus</i> |
| HCBNS23604  | <i>Bombus</i> | <i>Bombus rufocinctus</i> |
| HDBNS07903  | <i>Bombus</i> | <i>Bombus rufocinctus</i> |
| HDBNS08003  | <i>Bombus</i> | <i>Bombus rufocinctus</i> |
| JSAUG169111 | <i>Bombus</i> | <i>Bombus rufocinctus</i> |
| JSHYO71411  | <i>Bombus</i> | <i>Bombus rufocinctus</i> |
| JSHYO73111  | <i>Bombus</i> | <i>Bombus rufocinctus</i> |
| JSHYO74411  | <i>Bombus</i> | <i>Bombus rufocinctus</i> |
| NGAAC204514 | <i>Bombus</i> | <i>Bombus rufocinctus</i> |
| NGAAC205414 | <i>Bombus</i> | <i>Bombus rufocinctus</i> |
| NGAAC206714 | <i>Bombus</i> | <i>Bombus rufocinctus</i> |
| NGAAC206914 | <i>Bombus</i> | <i>Bombus rufocinctus</i> |
| NGAAC209414 | <i>Bombus</i> | <i>Bombus rufocinctus</i> |
| NGAAC210114 | <i>Bombus</i> | <i>Bombus rufocinctus</i> |
| NGAAD188714 | <i>Bombus</i> | <i>Bombus rufocinctus</i> |
| NGAAD189214 | <i>Bombus</i> | <i>Bombus rufocinctus</i> |
| NGAAD189314 | <i>Bombus</i> | <i>Bombus rufocinctus</i> |
| NGNAA197613 | <i>Bombus</i> | <i>Bombus rufocinctus</i> |
| NGNAA197713 | <i>Bombus</i> | <i>Bombus rufocinctus</i> |
| NGNAA198113 | <i>Bombus</i> | <i>Bombus rufocinctus</i> |
| NGNAA198213 | <i>Bombus</i> | <i>Bombus rufocinctus</i> |
| NGNAE29713  | <i>Bombus</i> | <i>Bombus rufocinctus</i> |
| NGNAK50313  | <i>Bombus</i> | <i>Bombus rufocinctus</i> |
| NGNAK50513  | <i>Bombus</i> | <i>Bombus rufocinctus</i> |
| NGNAL11513  | <i>Bombus</i> | <i>Bombus rufocinctus</i> |
| NGNAL11613  | <i>Bombus</i> | <i>Bombus rufocinctus</i> |
| NGNAL11713  | <i>Bombus</i> | <i>Bombus rufocinctus</i> |
| NGNAL11813  | <i>Bombus</i> | <i>Bombus rufocinctus</i> |
| NGNAL11913  | <i>Bombus</i> | <i>Bombus rufocinctus</i> |
| NGNAL12113  | <i>Bombus</i> | <i>Bombus rufocinctus</i> |
| NGNAS137614 | <i>Bombus</i> | <i>Bombus rufocinctus</i> |
| NGNAS138714 | <i>Bombus</i> | <i>Bombus rufocinctus</i> |
| NGNAS138914 | <i>Bombus</i> | <i>Bombus rufocinctus</i> |
| NGNAS139014 | <i>Bombus</i> | <i>Bombus rufocinctus</i> |
| NGNAS140014 | <i>Bombus</i> | <i>Bombus rufocinctus</i> |
| NGNAS140314 | <i>Bombus</i> | <i>Bombus rufocinctus</i> |
| NGNAS141414 | <i>Bombus</i> | <i>Bombus rufocinctus</i> |
| NGNAS141814 | <i>Bombus</i> | <i>Bombus rufocinctus</i> |
| NGNAT58314  | <i>Bombus</i> | <i>Bombus rufocinctus</i> |
| NGNAT58614  | <i>Bombus</i> | <i>Bombus rufocinctus</i> |
| NGNAT58714  | <i>Bombus</i> | <i>Bombus rufocinctus</i> |

|              |               |                             |
|--------------|---------------|-----------------------------|
| NGNAT58814   | <i>Bombus</i> | <i>Bombus rufocinctus</i>   |
| NGNAT58914   | <i>Bombus</i> | <i>Bombus rufocinctus</i>   |
| NGNAT59014   | <i>Bombus</i> | <i>Bombus rufocinctus</i>   |
| RRINV206815  | <i>Bombus</i> | <i>Bombus rufocinctus</i>   |
| RRMPG93215   | <i>Bombus</i> | <i>Bombus rufocinctus</i>   |
| SDP79505219  | <i>Bombus</i> | <i>Bombus rufocinctus</i>   |
| SMTPJ48114   | <i>Bombus</i> | <i>Bombus rufocinctus</i>   |
| SMTPJ48414   | <i>Bombus</i> | <i>Bombus rufocinctus</i>   |
| SSWLB361913  | <i>Bombus</i> | <i>Bombus rufocinctus</i>   |
| SSWLB362013  | <i>Bombus</i> | <i>Bombus rufocinctus</i>   |
| SSWLE766313  | <i>Bombus</i> | <i>Bombus rufocinctus</i>   |
| SSWLE769313  | <i>Bombus</i> | <i>Bombus rufocinctus</i>   |
| TTHYW39008   | <i>Bombus</i> | <i>Bombus rufocinctus</i>   |
| UPOLB18809   | <i>Bombus</i> | <i>Bombus rufocinctus</i>   |
| UPOLB71309   | <i>Bombus</i> | <i>Bombus rufocinctus</i>   |
| UPOLL11209   | <i>Bombus</i> | <i>Bombus rufocinctus</i>   |
| UPOLL27109   | <i>Bombus</i> | <i>Bombus rufocinctus</i>   |
| UPOLL42409   | <i>Bombus</i> | <i>Bombus rufocinctus</i>   |
| UPOLL52209   | <i>Bombus</i> | <i>Bombus rufocinctus</i>   |
| UPOLL69409   | <i>Bombus</i> | <i>Bombus rufocinctus</i>   |
| UPOLL77509   | <i>Bombus</i> | <i>Bombus rufocinctus</i>   |
| GBMIN7274717 | <i>Bombus</i> | <i>Bombus rufofasciatus</i> |
| BEEEE08315   | <i>Bombus</i> | <i>Bombus rupestris</i>     |
| BEEEE18715   | <i>Bombus</i> | <i>Bombus rupestris</i>     |
| BEEEE31416   | <i>Bombus</i> | <i>Bombus rupestris</i>     |
| FBAPC70711   | <i>Bombus</i> | <i>Bombus rupestris</i>     |
| FBHAP83409   | <i>Bombus</i> | <i>Bombus rupestris</i>     |
| FBHAP83609   | <i>Bombus</i> | <i>Bombus rupestris</i>     |
| FBHAP83709   | <i>Bombus</i> | <i>Bombus rupestris</i>     |
| GBACU230913  | <i>Bombus</i> | <i>Bombus rupestris</i>     |
| GBACU231013  | <i>Bombus</i> | <i>Bombus rupestris</i>     |
| GBACU231113  | <i>Bombus</i> | <i>Bombus rupestris</i>     |
| GBACU231213  | <i>Bombus</i> | <i>Bombus rupestris</i>     |
| GBACU241013  | <i>Bombus</i> | <i>Bombus rupestris</i>     |
| GBACU241113  | <i>Bombus</i> | <i>Bombus rupestris</i>     |
| GBACU241213  | <i>Bombus</i> | <i>Bombus rupestris</i>     |
| GBAH075106   | <i>Bombus</i> | <i>Bombus rupestris</i>     |
| GBAH075206   | <i>Bombus</i> | <i>Bombus rupestris</i>     |
| GBAH1649719  | <i>Bombus</i> | <i>Bombus rupestris</i>     |
| GBAH1836319  | <i>Bombus</i> | <i>Bombus rupestris</i>     |
| GBLGC03412   | <i>Bombus</i> | <i>Bombus rupestris</i>     |
| GBMIN7274817 | <i>Bombus</i> | <i>Bombus rupestris</i>     |
| BBHEC15809   | <i>Bombus</i> | <i>Bombus sandersoni</i>    |
| BBHEC17809   | <i>Bombus</i> | <i>Bombus sandersoni</i>    |
| BBHYL24910   | <i>Bombus</i> | <i>Bombus sandersoni</i>    |
| BEECA31006   | <i>Bombus</i> | <i>Bombus sandersoni</i>    |

|              |               |                             |
|--------------|---------------|-----------------------------|
| BEECA31106   | <i>Bombus</i> | <i>Bombus sandersoni</i>    |
| BEECC26208   | <i>Bombus</i> | <i>Bombus sandersoni</i>    |
| BEEMH24906   | <i>Bombus</i> | <i>Bombus sandersoni</i>    |
| BEO00304     | <i>Bombus</i> | <i>Bombus sandersoni</i>    |
| GMGSM06213   | <i>Bombus</i> | <i>Bombus sandersoni</i>    |
| HCBNS12803   | <i>Bombus</i> | <i>Bombus sandersoni</i>    |
| HCBNS13203   | <i>Bombus</i> | <i>Bombus sandersoni</i>    |
| BBWP34809    | <i>Bombus</i> | <i>Bombus schrencki</i>     |
| GBAH038406   | <i>Bombus</i> | <i>Bombus schrencki</i>     |
| GBAH038506   | <i>Bombus</i> | <i>Bombus schrencki</i>     |
| GBAH038606   | <i>Bombus</i> | <i>Bombus schrencki</i>     |
| GBAH038706   | <i>Bombus</i> | <i>Bombus schrencki</i>     |
| GBAH038806   | <i>Bombus</i> | <i>Bombus schrencki</i>     |
| GBAH038906   | <i>Bombus</i> | <i>Bombus schrencki</i>     |
| GBAH039006   | <i>Bombus</i> | <i>Bombus schrencki</i>     |
| GBAH039106   | <i>Bombus</i> | <i>Bombus schrencki</i>     |
| GBAH041506   | <i>Bombus</i> | <i>Bombus schrencki</i>     |
| GBAH1785819  | <i>Bombus</i> | <i>Bombus schrencki</i>     |
| GBMIN7064817 | <i>Bombus</i> | <i>Bombus schrencki</i>     |
| GBMNA3232019 | <i>Bombus</i> | <i>Bombus schrencki</i>     |
| GBAH1094015  | <i>Bombus</i> | <i>Bombus securus</i>       |
| GBAH1094115  | <i>Bombus</i> | <i>Bombus securus</i>       |
| BBBO38111    | <i>Bombus</i> | <i>Bombus semenoviellus</i> |
| BBBO38211    | <i>Bombus</i> | <i>Bombus semenoviellus</i> |
| BBWP23909    | <i>Bombus</i> | <i>Bombus semenoviellus</i> |
| BBWP24009    | <i>Bombus</i> | <i>Bombus semenoviellus</i> |
| BBWP28309    | <i>Bombus</i> | <i>Bombus semenoviellus</i> |
| BBWP28409    | <i>Bombus</i> | <i>Bombus semenoviellus</i> |
| BBWP28509    | <i>Bombus</i> | <i>Bombus semenoviellus</i> |
| FBAPD61211   | <i>Bombus</i> | <i>Bombus semenoviellus</i> |
| FBAPD61311   | <i>Bombus</i> | <i>Bombus semenoviellus</i> |
| FBAPD61411   | <i>Bombus</i> | <i>Bombus semenoviellus</i> |
| FBAPD61511   | <i>Bombus</i> | <i>Bombus semenoviellus</i> |
| FBSYM30010   | <i>Bombus</i> | <i>Bombus semenoviellus</i> |
| BBWP36009    | <i>Bombus</i> | <i>Bombus sibiricus</i>     |
| GBMNA4152819 | <i>Bombus</i> | <i>Bombus sibiricus</i>     |
| FBAPC71711   | <i>Bombus</i> | <i>Bombus sichelii</i>      |
| FBSYM30110   | <i>Bombus</i> | <i>Bombus sichelii</i>      |
| FBSYM30210   | <i>Bombus</i> | <i>Bombus sichelii</i>      |
| FBSYM30310   | <i>Bombus</i> | <i>Bombus sichelii</i>      |
| FBSYM30410   | <i>Bombus</i> | <i>Bombus sichelii</i>      |
| GBACU119712  | <i>Bombus</i> | <i>Bombus sichelii</i>      |
| GBAH033906   | <i>Bombus</i> | <i>Bombus sichelii</i>      |
| GBAH034006   | <i>Bombus</i> | <i>Bombus sichelii</i>      |
| GBAH040506   | <i>Bombus</i> | <i>Bombus sichelii</i>      |
| GBAH040606   | <i>Bombus</i> | <i>Bombus sichelii</i>      |

|              |               |                         |                            |
|--------------|---------------|-------------------------|----------------------------|
| GBAH072006   | <i>Bombus</i> | <i>Bombus sichelii</i>  |                            |
| GBAH072106   | <i>Bombus</i> | <i>Bombus sichelii</i>  |                            |
| GBHAP127014  | <i>Bombus</i> | <i>Bombus sichelii</i>  |                            |
| GBHAP127114  | <i>Bombus</i> | <i>Bombus sichelii</i>  |                            |
| GBHAP127214  | <i>Bombus</i> | <i>Bombus sichelii</i>  |                            |
| GBHAP127314  | <i>Bombus</i> | <i>Bombus sichelii</i>  |                            |
| GBHAP127414  | <i>Bombus</i> | <i>Bombus sichelii</i>  |                            |
| GBHAP127514  | <i>Bombus</i> | <i>Bombus sichelii</i>  |                            |
| GBHAP127614  | <i>Bombus</i> | <i>Bombus sichelii</i>  |                            |
| GBHAP127714  | <i>Bombus</i> | <i>Bombus sichelii</i>  |                            |
| GBHAP127814  | <i>Bombus</i> | <i>Bombus sichelii</i>  |                            |
| GBHAP127914  | <i>Bombus</i> | <i>Bombus sichelii</i>  |                            |
| GBHAP137915  | <i>Bombus</i> | <i>Bombus sichelii</i>  | <i>Bombus erzurumensis</i> |
| GBHAP138015  | <i>Bombus</i> | <i>Bombus sichelii</i>  | <i>Bombus erzurumensis</i> |
| GBHAP138115  | <i>Bombus</i> | <i>Bombus sichelii</i>  |                            |
| GBHAP138215  | <i>Bombus</i> | <i>Bombus sichelii</i>  |                            |
| GBHAP138315  | <i>Bombus</i> | <i>Bombus sichelii</i>  |                            |
| GBHAP138415  | <i>Bombus</i> | <i>Bombus sichelii</i>  |                            |
| GBHAP138515  | <i>Bombus</i> | <i>Bombus sichelii</i>  |                            |
| GBHAP138615  | <i>Bombus</i> | <i>Bombus sichelii</i>  |                            |
| GBHAP141115  | <i>Bombus</i> | <i>Bombus sichelii</i>  |                            |
| GBHAP141215  | <i>Bombus</i> | <i>Bombus sichelii</i>  |                            |
| GBMIN7274917 | <i>Bombus</i> | <i>Bombus sichelii</i>  |                            |
| BBHYL21810   | <i>Bombus</i> | <i>Bombus sitkensis</i> |                            |
| BBHYL25410   | <i>Bombus</i> | <i>Bombus sitkensis</i> |                            |
| BBHYL25810   | <i>Bombus</i> | <i>Bombus sitkensis</i> |                            |
| CNGCE102015  | <i>Bombus</i> | <i>Bombus sitkensis</i> |                            |
| SMTPM637715  | <i>Bombus</i> | <i>Bombus sitkensis</i> |                            |
| TTHYW28308   | <i>Bombus</i> | <i>Bombus sitkensis</i> |                            |
| UAMIC68813   | <i>Bombus</i> | <i>Bombus sitkensis</i> |                            |
| UAMIC71313   | <i>Bombus</i> | <i>Bombus sitkensis</i> |                            |
| GBAH041006   | <i>Bombus</i> | <i>Bombus sonani</i>    |                            |
| BEEEE31516   | <i>Bombus</i> | <i>Bombus soroensis</i> |                            |
| FBAPC71011   | <i>Bombus</i> | <i>Bombus soroensis</i> |                            |
| FBAPC71111   | <i>Bombus</i> | <i>Bombus soroensis</i> |                            |
| FBHAP84009   | <i>Bombus</i> | <i>Bombus soroensis</i> |                            |
| FBHAP84109   | <i>Bombus</i> | <i>Bombus soroensis</i> |                            |
| GBACU118912  | <i>Bombus</i> | <i>Bombus soroensis</i> |                            |
| GBACU119012  | <i>Bombus</i> | <i>Bombus soroensis</i> |                            |
| GBACU119112  | <i>Bombus</i> | <i>Bombus soroensis</i> |                            |
| GBACU233913  | <i>Bombus</i> | <i>Bombus soroensis</i> |                            |
| GBACU96812   | <i>Bombus</i> | <i>Bombus soroensis</i> |                            |
| GBACU96912   | <i>Bombus</i> | <i>Bombus soroensis</i> |                            |
| GBACU97012   | <i>Bombus</i> | <i>Bombus soroensis</i> |                            |
| GBACU97212   | <i>Bombus</i> | <i>Bombus soroensis</i> |                            |
| GBAH040006   | <i>Bombus</i> | <i>Bombus soroensis</i> |                            |

|              |               |                            |
|--------------|---------------|----------------------------|
| GBAH072206   | <i>Bombus</i> | <i>Bombus soroensis</i>    |
| GBAH072306   | <i>Bombus</i> | <i>Bombus soroensis</i>    |
| GBAH072406   | <i>Bombus</i> | <i>Bombus soroensis</i>    |
| GBAH072506   | <i>Bombus</i> | <i>Bombus soroensis</i>    |
| GBAH072606   | <i>Bombus</i> | <i>Bombus soroensis</i>    |
| GBMIN7275017 | <i>Bombus</i> | <i>Bombus soroensis</i>    |
| GBMIN7275117 | <i>Bombus</i> | <i>Bombus soroensis</i>    |
| BBBO11610    | <i>Bombus</i> | <i>Bombus sporadicus</i>   |
| BBBO11710    | <i>Bombus</i> | <i>Bombus sporadicus</i>   |
| BBBO11810    | <i>Bombus</i> | <i>Bombus sporadicus</i>   |
| BBBO11910    | <i>Bombus</i> | <i>Bombus sporadicus</i>   |
| BBBO12010    | <i>Bombus</i> | <i>Bombus sporadicus</i>   |
| BBBO12110    | <i>Bombus</i> | <i>Bombus sporadicus</i>   |
| BBBO13210    | <i>Bombus</i> | <i>Bombus sporadicus</i>   |
| BBBO13310    | <i>Bombus</i> | <i>Bombus sporadicus</i>   |
| BBBO16910    | <i>Bombus</i> | <i>Bombus sporadicus</i>   |
| BBBO17010    | <i>Bombus</i> | <i>Bombus sporadicus</i>   |
| BBBO20010    | <i>Bombus</i> | <i>Bombus sporadicus</i>   |
| BBBO20110    | <i>Bombus</i> | <i>Bombus sporadicus</i>   |
| BBBO22310    | <i>Bombus</i> | <i>Bombus sporadicus</i>   |
| BBBO22410    | <i>Bombus</i> | <i>Bombus sporadicus</i>   |
| BBBO32710    | <i>Bombus</i> | <i>Bombus sporadicus</i>   |
| BBWP35409    | <i>Bombus</i> | <i>Bombus sporadicus</i>   |
| GBAH031906   | <i>Bombus</i> | <i>Bombus sporadicus</i>   |
| GBAH072706   | <i>Bombus</i> | <i>Bombus sporadicus</i>   |
| GMFIN20813   | <i>Bombus</i> | <i>Bombus sporadicus</i>   |
| GMFIN20913   | <i>Bombus</i> | <i>Bombus sporadicus</i>   |
| GMFIN21013   | <i>Bombus</i> | <i>Bombus sporadicus</i>   |
| BBWP09009    | <i>Bombus</i> | <i>Bombus subterraneus</i> |
| BBWP09109    | <i>Bombus</i> | <i>Bombus subterraneus</i> |
| BBWP09309    | <i>Bombus</i> | <i>Bombus subterraneus</i> |
| BBWP09409    | <i>Bombus</i> | <i>Bombus subterraneus</i> |
| BBWP09509    | <i>Bombus</i> | <i>Bombus subterraneus</i> |
| BBWP11809    | <i>Bombus</i> | <i>Bombus subterraneus</i> |
| BBWP11909    | <i>Bombus</i> | <i>Bombus subterraneus</i> |
| BBWP12109    | <i>Bombus</i> | <i>Bombus subterraneus</i> |
| BBWP12209    | <i>Bombus</i> | <i>Bombus subterraneus</i> |
| BBWP12309    | <i>Bombus</i> | <i>Bombus subterraneus</i> |
| BBWP12409    | <i>Bombus</i> | <i>Bombus subterraneus</i> |
| BBWP12509    | <i>Bombus</i> | <i>Bombus subterraneus</i> |
| BBWP12609    | <i>Bombus</i> | <i>Bombus subterraneus</i> |
| BBWP12709    | <i>Bombus</i> | <i>Bombus subterraneus</i> |
| BBWP12809    | <i>Bombus</i> | <i>Bombus subterraneus</i> |
| BBWP12909    | <i>Bombus</i> | <i>Bombus subterraneus</i> |
| BBWP13009    | <i>Bombus</i> | <i>Bombus subterraneus</i> |
| BBWP13109    | <i>Bombus</i> | <i>Bombus subterraneus</i> |



|              |               |                            |
|--------------|---------------|----------------------------|
| BBWP13209    | <i>Bombus</i> | <i>Bombus subterraneus</i> |
| BBWP13409    | <i>Bombus</i> | <i>Bombus subterraneus</i> |
| BBWP15209    | <i>Bombus</i> | <i>Bombus subterraneus</i> |
| BBWP16709    | <i>Bombus</i> | <i>Bombus subterraneus</i> |
| BBWP16809    | <i>Bombus</i> | <i>Bombus subterraneus</i> |
| BBWP16909    | <i>Bombus</i> | <i>Bombus subterraneus</i> |
| BBWP17009    | <i>Bombus</i> | <i>Bombus subterraneus</i> |
| BBWP17309    | <i>Bombus</i> | <i>Bombus subterraneus</i> |
| BBWP17509    | <i>Bombus</i> | <i>Bombus subterraneus</i> |
| BBWP17609    | <i>Bombus</i> | <i>Bombus subterraneus</i> |
| BBWP17709    | <i>Bombus</i> | <i>Bombus subterraneus</i> |
| BBWP17809    | <i>Bombus</i> | <i>Bombus subterraneus</i> |
| BBWP22909    | <i>Bombus</i> | <i>Bombus subterraneus</i> |
| BBWP23009    | <i>Bombus</i> | <i>Bombus subterraneus</i> |
| BBWP23109    | <i>Bombus</i> | <i>Bombus subterraneus</i> |
| BBWP23209    | <i>Bombus</i> | <i>Bombus subterraneus</i> |
| BBWP23309    | <i>Bombus</i> | <i>Bombus subterraneus</i> |
| BBWP23409    | <i>Bombus</i> | <i>Bombus subterraneus</i> |
| BBWP23509    | <i>Bombus</i> | <i>Bombus subterraneus</i> |
| BBWP23609    | <i>Bombus</i> | <i>Bombus subterraneus</i> |
| BEEEE16815   | <i>Bombus</i> | <i>Bombus subterraneus</i> |
| BOWGF18508   | <i>Bombus</i> | <i>Bombus subterraneus</i> |
| FBAPD62011   | <i>Bombus</i> | <i>Bombus subterraneus</i> |
| FBAPD62111   | <i>Bombus</i> | <i>Bombus subterraneus</i> |
| FBAPD62211   | <i>Bombus</i> | <i>Bombus subterraneus</i> |
| FBAPD62311   | <i>Bombus</i> | <i>Bombus subterraneus</i> |
| FBSYM30510   | <i>Bombus</i> | <i>Bombus subterraneus</i> |
| FBSYM30610   | <i>Bombus</i> | <i>Bombus subterraneus</i> |
| GBAH032806   | <i>Bombus</i> | <i>Bombus subterraneus</i> |
| GBAH032906   | <i>Bombus</i> | <i>Bombus subterraneus</i> |
| GBAH072806   | <i>Bombus</i> | <i>Bombus subterraneus</i> |
| GBAH072906   | <i>Bombus</i> | <i>Bombus subterraneus</i> |
| GBHAP04713   | <i>Bombus</i> | <i>Bombus subterraneus</i> |
| GBAH1094215  | <i>Bombus</i> | <i>Bombus supremus</i>     |
| GBAH1094315  | <i>Bombus</i> | <i>Bombus supremus</i>     |
| GBMIN7275817 | <i>Bombus</i> | <i>Bombus supremus</i>     |
| BEEEE12215   | <i>Bombus</i> | <i>Bombus sylvarum</i>     |
| BEEEE16915   | <i>Bombus</i> | <i>Bombus sylvarum</i>     |
| BOWGF18108   | <i>Bombus</i> | <i>Bombus sylvarum</i>     |
| BOWGF18408   | <i>Bombus</i> | <i>Bombus sylvarum</i>     |
| FBAPD60811   | <i>Bombus</i> | <i>Bombus sylvarum</i>     |
| FBAPD60911   | <i>Bombus</i> | <i>Bombus sylvarum</i>     |
| FBAPD61011   | <i>Bombus</i> | <i>Bombus sylvarum</i>     |
| FBAPD61111   | <i>Bombus</i> | <i>Bombus sylvarum</i>     |
| FBHAP84209   | <i>Bombus</i> | <i>Bombus sylvarum</i>     |
| GBACU230513  | <i>Bombus</i> | <i>Bombus sylvarum</i>     |

|              |               |                          |
|--------------|---------------|--------------------------|
| GBACU346413  | <i>Bombus</i> | <i>Bombus sylvarum</i>   |
| GBACU346513  | <i>Bombus</i> | <i>Bombus sylvarum</i>   |
| GBACU347213  | <i>Bombus</i> | <i>Bombus sylvarum</i>   |
| GBACU97312   | <i>Bombus</i> | <i>Bombus sylvarum</i>   |
| GBACU97412   | <i>Bombus</i> | <i>Bombus sylvarum</i>   |
| GBACU97512   | <i>Bombus</i> | <i>Bombus sylvarum</i>   |
| GBACU98412   | <i>Bombus</i> | <i>Bombus sylvarum</i>   |
| GBAH073006   | <i>Bombus</i> | <i>Bombus sylvarum</i>   |
| GBAH073106   | <i>Bombus</i> | <i>Bombus sylvarum</i>   |
| GBAH073206   | <i>Bombus</i> | <i>Bombus sylvarum</i>   |
| GBAH1836419  | <i>Bombus</i> | <i>Bombus sylvarum</i>   |
| GBCHA59213   | <i>Bombus</i> | <i>Bombus sylvarum</i>   |
| GBLGC03512   | <i>Bombus</i> | <i>Bombus sylvarum</i>   |
| GBMIN7276117 | <i>Bombus</i> | <i>Bombus sylvarum</i>   |
| POLLE274219  | <i>Bombus</i> | <i>Bombus sylvarum</i>   |
| POLLE283819  | <i>Bombus</i> | <i>Bombus sylvarum</i>   |
| POLLE285319  | <i>Bombus</i> | <i>Bombus sylvarum</i>   |
| POLLE287319  | <i>Bombus</i> | <i>Bombus sylvarum</i>   |
| BEEEE03115   | <i>Bombus</i> | <i>Bombus sylvestris</i> |
| BEEEE19115   | <i>Bombus</i> | <i>Bombus sylvestris</i> |
| BEEEE31616   | <i>Bombus</i> | <i>Bombus sylvestris</i> |
| BEEEE31716   | <i>Bombus</i> | <i>Bombus sylvestris</i> |
| BEEEE33616   | <i>Bombus</i> | <i>Bombus sylvestris</i> |
| FBHAP76109   | <i>Bombus</i> | <i>Bombus sylvestris</i> |
| FBHAP81909   | <i>Bombus</i> | <i>Bombus sylvestris</i> |
| FBHAP84309   | <i>Bombus</i> | <i>Bombus sylvestris</i> |
| FBHAP84409   | <i>Bombus</i> | <i>Bombus sylvestris</i> |
| FBHAP84609   | <i>Bombus</i> | <i>Bombus sylvestris</i> |
| FBHAP84809   | <i>Bombus</i> | <i>Bombus sylvestris</i> |
| FBHAP84909   | <i>Bombus</i> | <i>Bombus sylvestris</i> |
| GBACU348813  | <i>Bombus</i> | <i>Bombus sylvestris</i> |
| GBACU348913  | <i>Bombus</i> | <i>Bombus sylvestris</i> |
| GBACU349013  | <i>Bombus</i> | <i>Bombus sylvestris</i> |
| GBACU349113  | <i>Bombus</i> | <i>Bombus sylvestris</i> |
| GBAH075306   | <i>Bombus</i> | <i>Bombus sylvestris</i> |
| GBAH075406   | <i>Bombus</i> | <i>Bombus sylvestris</i> |
| GBAH075506   | <i>Bombus</i> | <i>Bombus sylvestris</i> |
| GBAH075606   | <i>Bombus</i> | <i>Bombus sylvestris</i> |
| GBAH075706   | <i>Bombus</i> | <i>Bombus sylvestris</i> |
| GBAH1741319  | <i>Bombus</i> | <i>Bombus sylvestris</i> |
| GBMAA222718  | <i>Bombus</i> | <i>Bombus sylvestris</i> |
| GBMAA222818  | <i>Bombus</i> | <i>Bombus sylvestris</i> |
| GBMAA223018  | <i>Bombus</i> | <i>Bombus sylvestris</i> |
| GBMAA223118  | <i>Bombus</i> | <i>Bombus sylvestris</i> |
| GBMNB6226320 | <i>Bombus</i> | <i>Bombus sylvestris</i> |
| GBMNB6226920 | <i>Bombus</i> | <i>Bombus sylvestris</i> |

|             |               |                          |
|-------------|---------------|--------------------------|
| GBSP020406  | <i>Bombus</i> | <i>Bombus sylvestris</i> |
| GBSP020506  | <i>Bombus</i> | <i>Bombus sylvestris</i> |
| GMGRA166913 | <i>Bombus</i> | <i>Bombus sylvestris</i> |
| GMGRA168913 | <i>Bombus</i> | <i>Bombus sylvestris</i> |
| GMGRB135313 | <i>Bombus</i> | <i>Bombus sylvestris</i> |
| GMGRB135713 | <i>Bombus</i> | <i>Bombus sylvestris</i> |
| GMGRB135813 | <i>Bombus</i> | <i>Bombus sylvestris</i> |
| GMGRB136013 | <i>Bombus</i> | <i>Bombus sylvestris</i> |
| POLLE116919 | <i>Bombus</i> | <i>Bombus sylvestris</i> |
| POLLE145219 | <i>Bombus</i> | <i>Bombus sylvestris</i> |
| BBHEC13309  | <i>Bombus</i> | <i>Bombus ternarius</i>  |
| BBHEC13409  | <i>Bombus</i> | <i>Bombus ternarius</i>  |
| BBHEC13509  | <i>Bombus</i> | <i>Bombus ternarius</i>  |
| BBHYL22410  | <i>Bombus</i> | <i>Bombus ternarius</i>  |
| BBHYL22810  | <i>Bombus</i> | <i>Bombus ternarius</i>  |
| BBHYL23110  | <i>Bombus</i> | <i>Bombus ternarius</i>  |
| BBHYL25910  | <i>Bombus</i> | <i>Bombus ternarius</i>  |
| BBHYL26010  | <i>Bombus</i> | <i>Bombus ternarius</i>  |
| BBHYL26110  | <i>Bombus</i> | <i>Bombus ternarius</i>  |
| BBHYL26410  | <i>Bombus</i> | <i>Bombus ternarius</i>  |
| BEECA40706  | <i>Bombus</i> | <i>Bombus ternarius</i>  |
| BEECA40806  | <i>Bombus</i> | <i>Bombus ternarius</i>  |
| BEECA40906  | <i>Bombus</i> | <i>Bombus ternarius</i>  |
| BEECA41006  | <i>Bombus</i> | <i>Bombus ternarius</i>  |
| BEEMH10906  | <i>Bombus</i> | <i>Bombus ternarius</i>  |
| CNGRF40512  | <i>Bombus</i> | <i>Bombus ternarius</i>  |
| CNGRF40812  | <i>Bombus</i> | <i>Bombus ternarius</i>  |
| CNJAA27312  | <i>Bombus</i> | <i>Bombus ternarius</i>  |
| CNJAI06812  | <i>Bombus</i> | <i>Bombus ternarius</i>  |
| CNRMD245412 | <i>Bombus</i> | <i>Bombus ternarius</i>  |
| CNWBG303113 | <i>Bombus</i> | <i>Bombus ternarius</i>  |
| CNWLG96012  | <i>Bombus</i> | <i>Bombus ternarius</i>  |
| CNWLH47512  | <i>Bombus</i> | <i>Bombus ternarius</i>  |
| ERPIR22112  | <i>Bombus</i> | <i>Bombus ternarius</i>  |
| HCBNS20003  | <i>Bombus</i> | <i>Bombus ternarius</i>  |
| HCBNS20103  | <i>Bombus</i> | <i>Bombus ternarius</i>  |
| HCBNS23304  | <i>Bombus</i> | <i>Bombus ternarius</i>  |
| HCBNS23404  | <i>Bombus</i> | <i>Bombus ternarius</i>  |
| HDBNS25405  | <i>Bombus</i> | <i>Bombus ternarius</i>  |
| HDBNS25505  | <i>Bombus</i> | <i>Bombus ternarius</i>  |
| HGPPH01910  | <i>Bombus</i> | <i>Bombus ternarius</i>  |
| HGPPH02010  | <i>Bombus</i> | <i>Bombus ternarius</i>  |
| OPPFC19017  | <i>Bombus</i> | <i>Bombus ternarius</i>  |
| OPPFE00417  | <i>Bombus</i> | <i>Bombus ternarius</i>  |
| QUEBE00106  | <i>Bombus</i> | <i>Bombus ternarius</i>  |
| QUEBE00206  | <i>Bombus</i> | <i>Bombus ternarius</i>  |

|             |               |                          |
|-------------|---------------|--------------------------|
| QUEBE00306  | <i>Bombus</i> | <i>Bombus ternarius</i>  |
| QUEBE00406  | <i>Bombus</i> | <i>Bombus ternarius</i>  |
| QUEBE01106  | <i>Bombus</i> | <i>Bombus ternarius</i>  |
| QUEBE01806  | <i>Bombus</i> | <i>Bombus ternarius</i>  |
| SMTPL927115 | <i>Bombus</i> | <i>Bombus ternarius</i>  |
| SMTPM418715 | <i>Bombus</i> | <i>Bombus ternarius</i>  |
| SMTPM91015  | <i>Bombus</i> | <i>Bombus ternarius</i>  |
| TTHYW78908  | <i>Bombus</i> | <i>Bombus ternarius</i>  |
| BBBO05910   | <i>Bombus</i> | <i>Bombus terrestris</i> |
| BBBO06410   | <i>Bombus</i> | <i>Bombus terrestris</i> |
| BBBO07710   | <i>Bombus</i> | <i>Bombus terrestris</i> |
| BBBO07810   | <i>Bombus</i> | <i>Bombus terrestris</i> |
| BBBO09610   | <i>Bombus</i> | <i>Bombus terrestris</i> |
| BBBO09710   | <i>Bombus</i> | <i>Bombus terrestris</i> |
| BBBO09810   | <i>Bombus</i> | <i>Bombus terrestris</i> |
| BBBO10010   | <i>Bombus</i> | <i>Bombus terrestris</i> |
| BBBO10110   | <i>Bombus</i> | <i>Bombus terrestris</i> |
| BBBO10210   | <i>Bombus</i> | <i>Bombus terrestris</i> |
| BBBO10310   | <i>Bombus</i> | <i>Bombus terrestris</i> |
| BBBO10410   | <i>Bombus</i> | <i>Bombus terrestris</i> |
| BBBO10610   | <i>Bombus</i> | <i>Bombus terrestris</i> |
| BBBO10710   | <i>Bombus</i> | <i>Bombus terrestris</i> |
| BBBO10810   | <i>Bombus</i> | <i>Bombus terrestris</i> |
| BBBO11010   | <i>Bombus</i> | <i>Bombus terrestris</i> |
| BBBO11110   | <i>Bombus</i> | <i>Bombus terrestris</i> |
| BBBO15310   | <i>Bombus</i> | <i>Bombus terrestris</i> |
| BBBO15410   | <i>Bombus</i> | <i>Bombus terrestris</i> |
| BBBO15610   | <i>Bombus</i> | <i>Bombus terrestris</i> |
| BBBO15710   | <i>Bombus</i> | <i>Bombus terrestris</i> |
| BBBO16310   | <i>Bombus</i> | <i>Bombus terrestris</i> |
| BBBO31010   | <i>Bombus</i> | <i>Bombus terrestris</i> |
| BBBO33710   | <i>Bombus</i> | <i>Bombus terrestris</i> |
| BBBO33810   | <i>Bombus</i> | <i>Bombus terrestris</i> |
| BBBO33910   | <i>Bombus</i> | <i>Bombus terrestris</i> |
| BBBO34010   | <i>Bombus</i> | <i>Bombus terrestris</i> |
| BBBO36310   | <i>Bombus</i> | <i>Bombus terrestris</i> |
| BBBO36410   | <i>Bombus</i> | <i>Bombus terrestris</i> |
| BBBO36510   | <i>Bombus</i> | <i>Bombus terrestris</i> |
| BBBO36610   | <i>Bombus</i> | <i>Bombus terrestris</i> |
| BBBO36710   | <i>Bombus</i> | <i>Bombus terrestris</i> |
| BBBO36810   | <i>Bombus</i> | <i>Bombus terrestris</i> |
| BBBO36910   | <i>Bombus</i> | <i>Bombus terrestris</i> |
| BBBO37010   | <i>Bombus</i> | <i>Bombus terrestris</i> |
| BBBO38311   | <i>Bombus</i> | <i>Bombus terrestris</i> |
| BBBO38411   | <i>Bombus</i> | <i>Bombus terrestris</i> |
| BBBO40611   | <i>Bombus</i> | <i>Bombus terrestris</i> |

|             |               |                          |                          |
|-------------|---------------|--------------------------|--------------------------|
| BBBO40711   | <i>Bombus</i> | <i>Bombus terrestris</i> |                          |
| BBBO40811   | <i>Bombus</i> | <i>Bombus terrestris</i> |                          |
| BBBO40911   | <i>Bombus</i> | <i>Bombus terrestris</i> |                          |
| BBBO41011   | <i>Bombus</i> | <i>Bombus terrestris</i> |                          |
| BBBO41111   | <i>Bombus</i> | <i>Bombus terrestris</i> |                          |
| BBBO41211   | <i>Bombus</i> | <i>Bombus terrestris</i> |                          |
| BBBO41311   | <i>Bombus</i> | <i>Bombus terrestris</i> |                          |
| BBBO41411   | <i>Bombus</i> | <i>Bombus terrestris</i> |                          |
| BBBO41511   | <i>Bombus</i> | <i>Bombus terrestris</i> |                          |
| BBBO41611   | <i>Bombus</i> | <i>Bombus terrestris</i> |                          |
| BBBO41911   | <i>Bombus</i> | <i>Bombus terrestris</i> |                          |
| BBBO43211   | <i>Bombus</i> | <i>Bombus terrestris</i> |                          |
| BBBO43311   | <i>Bombus</i> | <i>Bombus terrestris</i> |                          |
| BBBO43411   | <i>Bombus</i> | <i>Bombus terrestris</i> |                          |
| BBBO43511   | <i>Bombus</i> | <i>Bombus terrestris</i> |                          |
| BBBO44011   | <i>Bombus</i> | <i>Bombus terrestris</i> |                          |
| BBBO44111   | <i>Bombus</i> | <i>Bombus terrestris</i> |                          |
| BBBO44211   | <i>Bombus</i> | <i>Bombus terrestris</i> |                          |
| BBBO44311   | <i>Bombus</i> | <i>Bombus terrestris</i> |                          |
| BBBO44411   | <i>Bombus</i> | <i>Bombus terrestris</i> |                          |
| BBBO45211   | <i>Bombus</i> | <i>Bombus terrestris</i> |                          |
| BBBO45311   | <i>Bombus</i> | <i>Bombus terrestris</i> |                          |
| BBBO45411   | <i>Bombus</i> | <i>Bombus terrestris</i> |                          |
| BBBO45511   | <i>Bombus</i> | <i>Bombus terrestris</i> |                          |
| BBBO46811   | <i>Bombus</i> | <i>Bombus terrestris</i> |                          |
| BEEEE03215  | <i>Bombus</i> | <i>Bombus terrestris</i> |                          |
| BEEEE03315  | <i>Bombus</i> | <i>Bombus terrestris</i> |                          |
| BEEEE03415  | <i>Bombus</i> | <i>Bombus terrestris</i> |                          |
| BEEEE11315  | <i>Bombus</i> | <i>Bombus terrestris</i> |                          |
| BEEEE29916  | <i>Bombus</i> | <i>Bombus terrestris</i> |                          |
| BEEEE31816  | <i>Bombus</i> | <i>Bombus terrestris</i> |                          |
| FBHAP85109  | <i>Bombus</i> | <i>Bombus terrestris</i> |                          |
| FBHAP85309  | <i>Bombus</i> | <i>Bombus terrestris</i> |                          |
| GBACU213013 | <i>Bombus</i> | <i>Bombus terrestris</i> |                          |
| GBACU231313 | <i>Bombus</i> | <i>Bombus terrestris</i> |                          |
| GBACU347313 | <i>Bombus</i> | <i>Bombus terrestris</i> |                          |
| GBACU347513 | <i>Bombus</i> | <i>Bombus terrestris</i> |                          |
| GBACU97812  | <i>Bombus</i> | <i>Bombus terrestris</i> |                          |
| GBAH068606  | <i>Bombus</i> | <i>Bombus terrestris</i> | <i>Bombus maderensis</i> |
| GBAH073306  | <i>Bombus</i> | <i>Bombus terrestris</i> |                          |
| GBAH073406  | <i>Bombus</i> | <i>Bombus terrestris</i> |                          |
| GBAH073506  | <i>Bombus</i> | <i>Bombus terrestris</i> |                          |
| GBAH1094415 | <i>Bombus</i> | <i>Bombus terrestris</i> |                          |
| GBAH1094515 | <i>Bombus</i> | <i>Bombus terrestris</i> |                          |
| GBAH1615819 | <i>Bombus</i> | <i>Bombus terrestris</i> |                          |
| GBAH1644519 | <i>Bombus</i> | <i>Bombus terrestris</i> |                          |

|             |               |                          |
|-------------|---------------|--------------------------|
| GBAH1644619 | <i>Bombus</i> | <i>Bombus terrestris</i> |
| GBAH1649519 | <i>Bombus</i> | <i>Bombus terrestris</i> |
| GBAH1655419 | <i>Bombus</i> | <i>Bombus terrestris</i> |
| GBAH1655819 | <i>Bombus</i> | <i>Bombus terrestris</i> |
| GBAH1656019 | <i>Bombus</i> | <i>Bombus terrestris</i> |
| GBAH1656119 | <i>Bombus</i> | <i>Bombus terrestris</i> |
| GBAH1741219 | <i>Bombus</i> | <i>Bombus terrestris</i> |
| GBAH1741919 | <i>Bombus</i> | <i>Bombus terrestris</i> |
| GBAH1773819 | <i>Bombus</i> | <i>Bombus terrestris</i> |
| GBAH1836519 | <i>Bombus</i> | <i>Bombus terrestris</i> |
| GBAH1836619 | <i>Bombus</i> | <i>Bombus terrestris</i> |
| GBAH1836719 | <i>Bombus</i> | <i>Bombus terrestris</i> |
| GBAH1836819 | <i>Bombus</i> | <i>Bombus terrestris</i> |
| GBAH1836919 | <i>Bombus</i> | <i>Bombus terrestris</i> |
| GBAH1837019 | <i>Bombus</i> | <i>Bombus terrestris</i> |
| GBAH1837119 | <i>Bombus</i> | <i>Bombus terrestris</i> |
| GBAH1837219 | <i>Bombus</i> | <i>Bombus terrestris</i> |
| GBAH1837319 | <i>Bombus</i> | <i>Bombus terrestris</i> |
| GBAH1837419 | <i>Bombus</i> | <i>Bombus terrestris</i> |
| GBAH1837519 | <i>Bombus</i> | <i>Bombus terrestris</i> |
| GBAH1837619 | <i>Bombus</i> | <i>Bombus terrestris</i> |
| GBAH1837719 | <i>Bombus</i> | <i>Bombus terrestris</i> |
| GBAH1837819 | <i>Bombus</i> | <i>Bombus terrestris</i> |
| GBAH1837919 | <i>Bombus</i> | <i>Bombus terrestris</i> |
| GBAH1838019 | <i>Bombus</i> | <i>Bombus terrestris</i> |
| GBAH1838119 | <i>Bombus</i> | <i>Bombus terrestris</i> |
| GBAH1838219 | <i>Bombus</i> | <i>Bombus terrestris</i> |
| GBAH1838319 | <i>Bombus</i> | <i>Bombus terrestris</i> |
| GBAH1838419 | <i>Bombus</i> | <i>Bombus terrestris</i> |
| GBAH1838519 | <i>Bombus</i> | <i>Bombus terrestris</i> |
| GBAH1838619 | <i>Bombus</i> | <i>Bombus terrestris</i> |
| GBAH1838719 | <i>Bombus</i> | <i>Bombus terrestris</i> |
| GBAH1838819 | <i>Bombus</i> | <i>Bombus terrestris</i> |
| GBAH1838919 | <i>Bombus</i> | <i>Bombus terrestris</i> |
| GBAH1839019 | <i>Bombus</i> | <i>Bombus terrestris</i> |
| GBAH1839119 | <i>Bombus</i> | <i>Bombus terrestris</i> |
| GBAH1839219 | <i>Bombus</i> | <i>Bombus terrestris</i> |
| GBAH1839319 | <i>Bombus</i> | <i>Bombus terrestris</i> |
| GBAH1839419 | <i>Bombus</i> | <i>Bombus terrestris</i> |
| GBAH1839519 | <i>Bombus</i> | <i>Bombus terrestris</i> |
| GBAH1839619 | <i>Bombus</i> | <i>Bombus terrestris</i> |
| GBAH1839719 | <i>Bombus</i> | <i>Bombus terrestris</i> |
| GBAH1839819 | <i>Bombus</i> | <i>Bombus terrestris</i> |
| GBAH1839919 | <i>Bombus</i> | <i>Bombus terrestris</i> |
| GBAH1840019 | <i>Bombus</i> | <i>Bombus terrestris</i> |
| GBAH1840119 | <i>Bombus</i> | <i>Bombus terrestris</i> |

|             |               |                          |
|-------------|---------------|--------------------------|
| GBAH1840219 | <i>Bombus</i> | <i>Bombus terrestris</i> |
| GBAH1840319 | <i>Bombus</i> | <i>Bombus terrestris</i> |
| GBAH1840419 | <i>Bombus</i> | <i>Bombus terrestris</i> |
| GBAH1840519 | <i>Bombus</i> | <i>Bombus terrestris</i> |
| GBAH1840619 | <i>Bombus</i> | <i>Bombus terrestris</i> |
| GBAH1840719 | <i>Bombus</i> | <i>Bombus terrestris</i> |
| GBAH1840819 | <i>Bombus</i> | <i>Bombus terrestris</i> |
| GBAH1840919 | <i>Bombus</i> | <i>Bombus terrestris</i> |
| GBAH1841019 | <i>Bombus</i> | <i>Bombus terrestris</i> |
| GBAH1841119 | <i>Bombus</i> | <i>Bombus terrestris</i> |
| GBAH1841219 | <i>Bombus</i> | <i>Bombus terrestris</i> |
| GBAH1841319 | <i>Bombus</i> | <i>Bombus terrestris</i> |
| GBAH1841419 | <i>Bombus</i> | <i>Bombus terrestris</i> |
| GBAH1841519 | <i>Bombus</i> | <i>Bombus terrestris</i> |
| GBAH1841619 | <i>Bombus</i> | <i>Bombus terrestris</i> |
| GBAH1841719 | <i>Bombus</i> | <i>Bombus terrestris</i> |
| GBAH1841819 | <i>Bombus</i> | <i>Bombus terrestris</i> |
| GBAH1841919 | <i>Bombus</i> | <i>Bombus terrestris</i> |
| GBAH1842019 | <i>Bombus</i> | <i>Bombus terrestris</i> |
| GBAH1842119 | <i>Bombus</i> | <i>Bombus terrestris</i> |
| GBAH1842219 | <i>Bombus</i> | <i>Bombus terrestris</i> |
| GBAH1842319 | <i>Bombus</i> | <i>Bombus terrestris</i> |
| GBAH1842419 | <i>Bombus</i> | <i>Bombus terrestris</i> |
| GBAH1842519 | <i>Bombus</i> | <i>Bombus terrestris</i> |
| GBAH1842619 | <i>Bombus</i> | <i>Bombus terrestris</i> |
| GBAH1842719 | <i>Bombus</i> | <i>Bombus terrestris</i> |
| GBAH1842819 | <i>Bombus</i> | <i>Bombus terrestris</i> |
| GBAH1842919 | <i>Bombus</i> | <i>Bombus terrestris</i> |
| GBCHA58613  | <i>Bombus</i> | <i>Bombus terrestris</i> |
| GBCHA58713  | <i>Bombus</i> | <i>Bombus terrestris</i> |
| GBCHA58813  | <i>Bombus</i> | <i>Bombus terrestris</i> |
| GBHAP140815 | <i>Bombus</i> | <i>Bombus terrestris</i> |
| GBHAP140915 | <i>Bombus</i> | <i>Bombus terrestris</i> |
| GBHAP27513  | <i>Bombus</i> | <i>Bombus terrestris</i> |
| GBHAP27613  | <i>Bombus</i> | <i>Bombus terrestris</i> |
| GBHAP27713  | <i>Bombus</i> | <i>Bombus terrestris</i> |
| GBHAP27813  | <i>Bombus</i> | <i>Bombus terrestris</i> |
| GBHAP27913  | <i>Bombus</i> | <i>Bombus terrestris</i> |
| GBHAP28013  | <i>Bombus</i> | <i>Bombus terrestris</i> |
| GBHAP28113  | <i>Bombus</i> | <i>Bombus terrestris</i> |
| GBHAP28213  | <i>Bombus</i> | <i>Bombus terrestris</i> |
| GBHAP28313  | <i>Bombus</i> | <i>Bombus terrestris</i> |
| GBHAP28413  | <i>Bombus</i> | <i>Bombus terrestris</i> |
| GBHAP28513  | <i>Bombus</i> | <i>Bombus terrestris</i> |
| GBHAP28613  | <i>Bombus</i> | <i>Bombus terrestris</i> |
| GBHAP28713  | <i>Bombus</i> | <i>Bombus terrestris</i> |

|              |               |                          |                           |
|--------------|---------------|--------------------------|---------------------------|
| GBHAP28813   | <i>Bombus</i> | <i>Bombus terrestris</i> |                           |
| GBHAP28913   | <i>Bombus</i> | <i>Bombus terrestris</i> |                           |
| GBHAP29013   | <i>Bombus</i> | <i>Bombus terrestris</i> | <i>Bombus maderensis</i>  |
| GBHAP29113   | <i>Bombus</i> | <i>Bombus terrestris</i> |                           |
| GBHAP29213   | <i>Bombus</i> | <i>Bombus terrestris</i> |                           |
| GBHAP29313   | <i>Bombus</i> | <i>Bombus terrestris</i> |                           |
| GBHAP29413   | <i>Bombus</i> | <i>Bombus terrestris</i> |                           |
| GBHAP29613   | <i>Bombus</i> | <i>Bombus terrestris</i> | <i>Bombus canariensis</i> |
| GBMAB80015   | <i>Bombus</i> | <i>Bombus terrestris</i> |                           |
| GBMIN7276317 | <i>Bombus</i> | <i>Bombus terrestris</i> |                           |
| GBMIN7276417 | <i>Bombus</i> | <i>Bombus terrestris</i> |                           |
| GBMIN7276517 | <i>Bombus</i> | <i>Bombus terrestris</i> |                           |
| GBMIN7276617 | <i>Bombus</i> | <i>Bombus terrestris</i> |                           |
| GBMIN7276717 | <i>Bombus</i> | <i>Bombus terrestris</i> |                           |
| GBMIN7276817 | <i>Bombus</i> | <i>Bombus terrestris</i> |                           |
| GBMIN7276917 | <i>Bombus</i> | <i>Bombus terrestris</i> |                           |
| GBMIN7277017 | <i>Bombus</i> | <i>Bombus terrestris</i> |                           |
| GBMIN7277117 | <i>Bombus</i> | <i>Bombus terrestris</i> |                           |
| GBMIN7277217 | <i>Bombus</i> | <i>Bombus terrestris</i> |                           |
| GBMIN7277317 | <i>Bombus</i> | <i>Bombus terrestris</i> |                           |
| GBMIN7277417 | <i>Bombus</i> | <i>Bombus terrestris</i> |                           |
| GBMIN7277517 | <i>Bombus</i> | <i>Bombus terrestris</i> |                           |
| GBMIN7277617 | <i>Bombus</i> | <i>Bombus terrestris</i> |                           |
| GBMIN7277717 | <i>Bombus</i> | <i>Bombus terrestris</i> |                           |
| GBMIN7277817 | <i>Bombus</i> | <i>Bombus terrestris</i> |                           |
| GBMIN7277917 | <i>Bombus</i> | <i>Bombus terrestris</i> |                           |
| GBMIN7278017 | <i>Bombus</i> | <i>Bombus terrestris</i> |                           |
| GBMIN7278117 | <i>Bombus</i> | <i>Bombus terrestris</i> |                           |
| GBMIN7278217 | <i>Bombus</i> | <i>Bombus terrestris</i> |                           |
| GBMIN7278317 | <i>Bombus</i> | <i>Bombus terrestris</i> |                           |
| GBMIN7278417 | <i>Bombus</i> | <i>Bombus terrestris</i> |                           |
| GBMIN7278517 | <i>Bombus</i> | <i>Bombus terrestris</i> |                           |
| GBMIN7278617 | <i>Bombus</i> | <i>Bombus terrestris</i> |                           |
| GBMIN7278717 | <i>Bombus</i> | <i>Bombus terrestris</i> |                           |
| POLLE01918   | <i>Bombus</i> | <i>Bombus terrestris</i> |                           |
| POLLE02918   | <i>Bombus</i> | <i>Bombus terrestris</i> |                           |
| POLLE03118   | <i>Bombus</i> | <i>Bombus terrestris</i> |                           |
| POLLE03818   | <i>Bombus</i> | <i>Bombus terrestris</i> |                           |
| POLLE05718   | <i>Bombus</i> | <i>Bombus terrestris</i> |                           |
| POLLE07418   | <i>Bombus</i> | <i>Bombus terrestris</i> |                           |
| POLLE07618   | <i>Bombus</i> | <i>Bombus terrestris</i> |                           |
| POLLE07718   | <i>Bombus</i> | <i>Bombus terrestris</i> |                           |
| POLLE09118   | <i>Bombus</i> | <i>Bombus terrestris</i> |                           |
| POLLE09218   | <i>Bombus</i> | <i>Bombus terrestris</i> |                           |
| POLLE10018   | <i>Bombus</i> | <i>Bombus terrestris</i> |                           |
| POLLE101119  | <i>Bombus</i> | <i>Bombus terrestris</i> |                           |



|             |               |                          |
|-------------|---------------|--------------------------|
| POLLE102719 | <i>Bombus</i> | <i>Bombus terrestris</i> |
| POLLE10418  | <i>Bombus</i> | <i>Bombus terrestris</i> |
| POLLE10618  | <i>Bombus</i> | <i>Bombus terrestris</i> |
| POLLE10818  | <i>Bombus</i> | <i>Bombus terrestris</i> |
| POLLE110819 | <i>Bombus</i> | <i>Bombus terrestris</i> |
| POLLE11618  | <i>Bombus</i> | <i>Bombus terrestris</i> |
| POLLE117019 | <i>Bombus</i> | <i>Bombus terrestris</i> |
| POLLE118019 | <i>Bombus</i> | <i>Bombus terrestris</i> |
| POLLE11818  | <i>Bombus</i> | <i>Bombus terrestris</i> |
| POLLE11918  | <i>Bombus</i> | <i>Bombus terrestris</i> |
| POLLE12018  | <i>Bombus</i> | <i>Bombus terrestris</i> |
| POLLE12218  | <i>Bombus</i> | <i>Bombus terrestris</i> |
| POLLE12418  | <i>Bombus</i> | <i>Bombus terrestris</i> |
| POLLE12518  | <i>Bombus</i> | <i>Bombus terrestris</i> |
| POLLE12618  | <i>Bombus</i> | <i>Bombus terrestris</i> |
| POLLE129319 | <i>Bombus</i> | <i>Bombus terrestris</i> |
| POLLE129619 | <i>Bombus</i> | <i>Bombus terrestris</i> |
| POLLE131119 | <i>Bombus</i> | <i>Bombus terrestris</i> |
| POLLE131319 | <i>Bombus</i> | <i>Bombus terrestris</i> |
| POLLE13618  | <i>Bombus</i> | <i>Bombus terrestris</i> |
| POLLE14118  | <i>Bombus</i> | <i>Bombus terrestris</i> |
| POLLE14218  | <i>Bombus</i> | <i>Bombus terrestris</i> |
| POLLE14318  | <i>Bombus</i> | <i>Bombus terrestris</i> |
| POLLE145119 | <i>Bombus</i> | <i>Bombus terrestris</i> |
| POLLE146319 | <i>Bombus</i> | <i>Bombus terrestris</i> |
| POLLE14718  | <i>Bombus</i> | <i>Bombus terrestris</i> |
| POLLE14818  | <i>Bombus</i> | <i>Bombus terrestris</i> |
| POLLE15018  | <i>Bombus</i> | <i>Bombus terrestris</i> |
| POLLE15318  | <i>Bombus</i> | <i>Bombus terrestris</i> |
| POLLE164419 | <i>Bombus</i> | <i>Bombus terrestris</i> |
| POLLE164519 | <i>Bombus</i> | <i>Bombus terrestris</i> |
| POLLE165919 | <i>Bombus</i> | <i>Bombus terrestris</i> |
| POLLE166619 | <i>Bombus</i> | <i>Bombus terrestris</i> |
| POLLE16818  | <i>Bombus</i> | <i>Bombus terrestris</i> |
| POLLE180019 | <i>Bombus</i> | <i>Bombus terrestris</i> |
| POLLE180519 | <i>Bombus</i> | <i>Bombus terrestris</i> |
| POLLE181819 | <i>Bombus</i> | <i>Bombus terrestris</i> |
| POLLE182419 | <i>Bombus</i> | <i>Bombus terrestris</i> |
| POLLE183219 | <i>Bombus</i> | <i>Bombus terrestris</i> |
| POLLE183419 | <i>Bombus</i> | <i>Bombus terrestris</i> |
| POLLE183819 | <i>Bombus</i> | <i>Bombus terrestris</i> |
| POLLE18418  | <i>Bombus</i> | <i>Bombus terrestris</i> |
| POLLE184919 | <i>Bombus</i> | <i>Bombus terrestris</i> |
| POLLE191419 | <i>Bombus</i> | <i>Bombus terrestris</i> |
| POLLE191719 | <i>Bombus</i> | <i>Bombus terrestris</i> |
| POLLE191819 | <i>Bombus</i> | <i>Bombus terrestris</i> |

|             |               |                          |
|-------------|---------------|--------------------------|
| POLLE191919 | <i>Bombus</i> | <i>Bombus terrestris</i> |
| POLLE192019 | <i>Bombus</i> | <i>Bombus terrestris</i> |
| POLLE192119 | <i>Bombus</i> | <i>Bombus terrestris</i> |
| POLLE192419 | <i>Bombus</i> | <i>Bombus terrestris</i> |
| POLLE192719 | <i>Bombus</i> | <i>Bombus terrestris</i> |
| POLLE193319 | <i>Bombus</i> | <i>Bombus terrestris</i> |
| POLLE193419 | <i>Bombus</i> | <i>Bombus terrestris</i> |
| POLLE193519 | <i>Bombus</i> | <i>Bombus terrestris</i> |
| POLLE194319 | <i>Bombus</i> | <i>Bombus terrestris</i> |
| POLLE194419 | <i>Bombus</i> | <i>Bombus terrestris</i> |
| POLLE194619 | <i>Bombus</i> | <i>Bombus terrestris</i> |
| POLLE194719 | <i>Bombus</i> | <i>Bombus terrestris</i> |
| POLLE194819 | <i>Bombus</i> | <i>Bombus terrestris</i> |
| POLLE195019 | <i>Bombus</i> | <i>Bombus terrestris</i> |
| POLLE195619 | <i>Bombus</i> | <i>Bombus terrestris</i> |
| POLLE196719 | <i>Bombus</i> | <i>Bombus terrestris</i> |
| POLLE200119 | <i>Bombus</i> | <i>Bombus terrestris</i> |
| POLLE204919 | <i>Bombus</i> | <i>Bombus terrestris</i> |
| POLLE211619 | <i>Bombus</i> | <i>Bombus terrestris</i> |
| POLLE226519 | <i>Bombus</i> | <i>Bombus terrestris</i> |
| POLLE226619 | <i>Bombus</i> | <i>Bombus terrestris</i> |
| POLLE227719 | <i>Bombus</i> | <i>Bombus terrestris</i> |
| POLLE229419 | <i>Bombus</i> | <i>Bombus terrestris</i> |
| POLLE230119 | <i>Bombus</i> | <i>Bombus terrestris</i> |
| POLLE231519 | <i>Bombus</i> | <i>Bombus terrestris</i> |
| POLLE232919 | <i>Bombus</i> | <i>Bombus terrestris</i> |
| POLLE233019 | <i>Bombus</i> | <i>Bombus terrestris</i> |
| POLLE233119 | <i>Bombus</i> | <i>Bombus terrestris</i> |
| POLLE233219 | <i>Bombus</i> | <i>Bombus terrestris</i> |
| POLLE233819 | <i>Bombus</i> | <i>Bombus terrestris</i> |
| POLLE235019 | <i>Bombus</i> | <i>Bombus terrestris</i> |
| POLLE235619 | <i>Bombus</i> | <i>Bombus terrestris</i> |
| POLLE235919 | <i>Bombus</i> | <i>Bombus terrestris</i> |
| POLLE236019 | <i>Bombus</i> | <i>Bombus terrestris</i> |
| POLLE236419 | <i>Bombus</i> | <i>Bombus terrestris</i> |
| POLLE236519 | <i>Bombus</i> | <i>Bombus terrestris</i> |
| POLLE236619 | <i>Bombus</i> | <i>Bombus terrestris</i> |
| POLLE237519 | <i>Bombus</i> | <i>Bombus terrestris</i> |
| POLLE239819 | <i>Bombus</i> | <i>Bombus terrestris</i> |
| POLLE240619 | <i>Bombus</i> | <i>Bombus terrestris</i> |
| POLLE243319 | <i>Bombus</i> | <i>Bombus terrestris</i> |
| POLLE245719 | <i>Bombus</i> | <i>Bombus terrestris</i> |
| POLLE246619 | <i>Bombus</i> | <i>Bombus terrestris</i> |
| POLLE247019 | <i>Bombus</i> | <i>Bombus terrestris</i> |
| POLLE247219 | <i>Bombus</i> | <i>Bombus terrestris</i> |
| POLLE247319 | <i>Bombus</i> | <i>Bombus terrestris</i> |

|             |               |                          |
|-------------|---------------|--------------------------|
| POLLE251219 | <i>Bombus</i> | <i>Bombus terrestris</i> |
| POLLE264219 | <i>Bombus</i> | <i>Bombus terrestris</i> |
| POLLE270319 | <i>Bombus</i> | <i>Bombus terrestris</i> |
| POLLE270419 | <i>Bombus</i> | <i>Bombus terrestris</i> |
| POLLE270519 | <i>Bombus</i> | <i>Bombus terrestris</i> |
| POLLE271919 | <i>Bombus</i> | <i>Bombus terrestris</i> |
| POLLE272919 | <i>Bombus</i> | <i>Bombus terrestris</i> |
| POLLE273919 | <i>Bombus</i> | <i>Bombus terrestris</i> |
| POLLE286119 | <i>Bombus</i> | <i>Bombus terrestris</i> |
| POLLE286319 | <i>Bombus</i> | <i>Bombus terrestris</i> |
| POLLE286919 | <i>Bombus</i> | <i>Bombus terrestris</i> |
| POLLE291919 | <i>Bombus</i> | <i>Bombus terrestris</i> |
| POLLE295219 | <i>Bombus</i> | <i>Bombus terrestris</i> |
| POLLE295319 | <i>Bombus</i> | <i>Bombus terrestris</i> |
| POLLE296219 | <i>Bombus</i> | <i>Bombus terrestris</i> |
| POLLE302319 | <i>Bombus</i> | <i>Bombus terrestris</i> |
| POLLE318219 | <i>Bombus</i> | <i>Bombus terrestris</i> |
| POLLE323519 | <i>Bombus</i> | <i>Bombus terrestris</i> |
| POLLE327419 | <i>Bombus</i> | <i>Bombus terrestris</i> |
| POLLE331219 | <i>Bombus</i> | <i>Bombus terrestris</i> |
| POLLE335419 | <i>Bombus</i> | <i>Bombus terrestris</i> |
| POLLE340919 | <i>Bombus</i> | <i>Bombus terrestris</i> |
| POLLE346019 | <i>Bombus</i> | <i>Bombus terrestris</i> |
| POLLE349819 | <i>Bombus</i> | <i>Bombus terrestris</i> |
| POLLE37819  | <i>Bombus</i> | <i>Bombus terrestris</i> |
| POLLE48219  | <i>Bombus</i> | <i>Bombus terrestris</i> |
| POLLE60219  | <i>Bombus</i> | <i>Bombus terrestris</i> |
| POLLE64319  | <i>Bombus</i> | <i>Bombus terrestris</i> |
| POLLE71719  | <i>Bombus</i> | <i>Bombus terrestris</i> |
| POLLE90919  | <i>Bombus</i> | <i>Bombus terrestris</i> |
| POLLE96719  | <i>Bombus</i> | <i>Bombus terrestris</i> |
| POLLE99319  | <i>Bombus</i> | <i>Bombus terrestris</i> |
| BBBO13810   | <i>Bombus</i> | <i>Bombus terricola</i>  |
| BBBO13910   | <i>Bombus</i> | <i>Bombus terricola</i>  |
| BBBO14010   | <i>Bombus</i> | <i>Bombus terricola</i>  |
| BBHEC13909  | <i>Bombus</i> | <i>Bombus terricola</i>  |
| BBHEC14309  | <i>Bombus</i> | <i>Bombus terricola</i>  |
| BBHEC14409  | <i>Bombus</i> | <i>Bombus terricola</i>  |
| BBHYL25610  | <i>Bombus</i> | <i>Bombus terricola</i>  |
| BBHYL25710  | <i>Bombus</i> | <i>Bombus terricola</i>  |
| BBHYL27010  | <i>Bombus</i> | <i>Bombus terricola</i>  |
| BCLRB86810  | <i>Bombus</i> | <i>Bombus terricola</i>  |
| BEECA35306  | <i>Bombus</i> | <i>Bombus terricola</i>  |
| BEECA35406  | <i>Bombus</i> | <i>Bombus terricola</i>  |
| BEECA35506  | <i>Bombus</i> | <i>Bombus terricola</i>  |
| BEECA35606  | <i>Bombus</i> | <i>Bombus terricola</i>  |

|             |               |                         |
|-------------|---------------|-------------------------|
| BEECD33009  | <i>Bombus</i> | <i>Bombus terricola</i> |
| BEECD33109  | <i>Bombus</i> | <i>Bombus terricola</i> |
| BEECD38309  | <i>Bombus</i> | <i>Bombus terricola</i> |
| BEECD38409  | <i>Bombus</i> | <i>Bombus terricola</i> |
| BEECD38609  | <i>Bombus</i> | <i>Bombus terricola</i> |
| BEECD38709  | <i>Bombus</i> | <i>Bombus terricola</i> |
| BEECD38809  | <i>Bombus</i> | <i>Bombus terricola</i> |
| BEECD39209  | <i>Bombus</i> | <i>Bombus terricola</i> |
| BEECD39309  | <i>Bombus</i> | <i>Bombus terricola</i> |
| BEECD39409  | <i>Bombus</i> | <i>Bombus terricola</i> |
| BEECD39509  | <i>Bombus</i> | <i>Bombus terricola</i> |
| BEECD39609  | <i>Bombus</i> | <i>Bombus terricola</i> |
| BEECD39709  | <i>Bombus</i> | <i>Bombus terricola</i> |
| BEECD39809  | <i>Bombus</i> | <i>Bombus terricola</i> |
| BEECD39909  | <i>Bombus</i> | <i>Bombus terricola</i> |
| BEECD40009  | <i>Bombus</i> | <i>Bombus terricola</i> |
| BEECD40509  | <i>Bombus</i> | <i>Bombus terricola</i> |
| BEECD40609  | <i>Bombus</i> | <i>Bombus terricola</i> |
| BEECD40709  | <i>Bombus</i> | <i>Bombus terricola</i> |
| BEECD40809  | <i>Bombus</i> | <i>Bombus terricola</i> |
| BEECD40909  | <i>Bombus</i> | <i>Bombus terricola</i> |
| BEECD41009  | <i>Bombus</i> | <i>Bombus terricola</i> |
| BEECD41109  | <i>Bombus</i> | <i>Bombus terricola</i> |
| BEECD41309  | <i>Bombus</i> | <i>Bombus terricola</i> |
| BEECD43909  | <i>Bombus</i> | <i>Bombus terricola</i> |
| BEECD73509  | <i>Bombus</i> | <i>Bombus terricola</i> |
| BEECD87110  | <i>Bombus</i> | <i>Bombus terricola</i> |
| BEECD87210  | <i>Bombus</i> | <i>Bombus terricola</i> |
| BEECE28510  | <i>Bombus</i> | <i>Bombus terricola</i> |
| BEECE38110  | <i>Bombus</i> | <i>Bombus terricola</i> |
| BEECE82310  | <i>Bombus</i> | <i>Bombus terricola</i> |
| BEECE82610  | <i>Bombus</i> | <i>Bombus terricola</i> |
| BEECF02010  | <i>Bombus</i> | <i>Bombus terricola</i> |
| BEECF06110  | <i>Bombus</i> | <i>Bombus terricola</i> |
| BEECF06210  | <i>Bombus</i> | <i>Bombus terricola</i> |
| BEECF06310  | <i>Bombus</i> | <i>Bombus terricola</i> |
| BEECF58111  | <i>Bombus</i> | <i>Bombus terricola</i> |
| BEECF58211  | <i>Bombus</i> | <i>Bombus terricola</i> |
| BEECF80112  | <i>Bombus</i> | <i>Bombus terricola</i> |
| BEECF80212  | <i>Bombus</i> | <i>Bombus terricola</i> |
| BEECF80312  | <i>Bombus</i> | <i>Bombus terricola</i> |
| BEECF80412  | <i>Bombus</i> | <i>Bombus terricola</i> |
| BEECF80512  | <i>Bombus</i> | <i>Bombus terricola</i> |
| BWTWO127910 | <i>Bombus</i> | <i>Bombus terricola</i> |
| BWTWO70609  | <i>Bombus</i> | <i>Bombus terricola</i> |
| BWTWO70709  | <i>Bombus</i> | <i>Bombus terricola</i> |

|              |               |                             |                        |
|--------------|---------------|-----------------------------|------------------------|
| BWTWO70909   | <i>Bombus</i> | <i>Bombus terricola</i>     |                        |
| CNBRE109214  | <i>Bombus</i> | <i>Bombus terricola</i>     |                        |
| CNFNR197014  | <i>Bombus</i> | <i>Bombus terricola</i>     |                        |
| CNFNR390214  | <i>Bombus</i> | <i>Bombus terricola</i>     |                        |
| CNFNR398514  | <i>Bombus</i> | <i>Bombus terricola</i>     |                        |
| CNLMM03014   | <i>Bombus</i> | <i>Bombus terricola</i>     |                        |
| CNPEN06114   | <i>Bombus</i> | <i>Bombus terricola</i>     |                        |
| CNRME501512  | <i>Bombus</i> | <i>Bombus terricola</i>     |                        |
| HCBNS18803   | <i>Bombus</i> | <i>Bombus terricola</i>     |                        |
| HCBNS18903   | <i>Bombus</i> | <i>Bombus terricola</i>     |                        |
| HCBNS19003   | <i>Bombus</i> | <i>Bombus terricola</i>     |                        |
| HPPPK112813  | <i>Bombus</i> | <i>Bombus terricola</i>     |                        |
| HPPPL58413   | <i>Bombus</i> | <i>Bombus terricola</i>     |                        |
| INRMA323517  | <i>Bombus</i> | <i>Bombus terricola</i>     |                        |
| INRMA323717  | <i>Bombus</i> | <i>Bombus terricola</i>     |                        |
| INRMA323817  | <i>Bombus</i> | <i>Bombus terricola</i>     |                        |
| OPPEM238017  | <i>Bombus</i> | <i>Bombus terricola</i>     |                        |
| SSGBA527314  | <i>Bombus</i> | <i>Bombus terricola</i>     |                        |
| SSKOA00715   | <i>Bombus</i> | <i>Bombus terricola</i>     |                        |
| TTHYW65408   | <i>Bombus</i> | <i>Bombus terricola</i>     |                        |
| TTHYW80708   | <i>Bombus</i> | <i>Bombus terricola</i>     |                        |
| BBWP22809    | <i>Bombus</i> | <i>Bombus tichenkoi</i>     | <i>Bombus sushkini</i> |
| BBWP36809    | <i>Bombus</i> | <i>Bombus tichenkoi</i>     | <i>Bombus sushkini</i> |
| GBAH033606   | <i>Bombus</i> | <i>Bombus tichenkoi</i>     |                        |
| GBAH033706   | <i>Bombus</i> | <i>Bombus tichenkoi</i>     |                        |
| GBAH040306   | <i>Bombus</i> | <i>Bombus tichenkoi</i>     | <i>Bombus sushkini</i> |
| GBMIN7275917 | <i>Bombus</i> | <i>Bombus tichenkoi</i>     | <i>Bombus sushkini</i> |
| GBMIN7276017 | <i>Bombus</i> | <i>Bombus tichenkoi</i>     | <i>Bombus sushkini</i> |
| GBAH1094615  | <i>Bombus</i> | <i>Bombus transversalis</i> |                        |
| GBAH1094715  | <i>Bombus</i> | <i>Bombus transversalis</i> |                        |
| GBAH1094815  | <i>Bombus</i> | <i>Bombus transversalis</i> |                        |
| GBAH1094915  | <i>Bombus</i> | <i>Bombus transversalis</i> |                        |
| GBAH1095015  | <i>Bombus</i> | <i>Bombus transversalis</i> |                        |
| GBAH1582819  | <i>Bombus</i> | <i>Bombus transversalis</i> |                        |
| GBAH617009   | <i>Bombus</i> | <i>Bombus transversalis</i> |                        |
| GBAH039206   | <i>Bombus</i> | <i>Bombus tricornis</i>     |                        |
| GBAH039306   | <i>Bombus</i> | <i>Bombus tricornis</i>     |                        |
| GBAH039406   | <i>Bombus</i> | <i>Bombus tricornis</i>     |                        |
| BBWP49810    | <i>Bombus</i> | <i>Bombus trifasciatus</i>  |                        |
| BBWP50010    | <i>Bombus</i> | <i>Bombus trifasciatus</i>  |                        |
| GBAH032706   | <i>Bombus</i> | <i>Bombus trifasciatus</i>  |                        |
| GBAH1095115  | <i>Bombus</i> | <i>Bombus trifasciatus</i>  |                        |
| GBAH1677119  | <i>Bombus</i> | <i>Bombus trifasciatus</i>  |                        |
| GBAH1816019  | <i>Bombus</i> | <i>Bombus trifasciatus</i>  |                        |
| GBAH1816419  | <i>Bombus</i> | <i>Bombus trifasciatus</i>  |                        |
| GBAH1816719  | <i>Bombus</i> | <i>Bombus trifasciatus</i>  |                        |

|              |               |                            |                           |
|--------------|---------------|----------------------------|---------------------------|
| GBAH1816819  | <i>Bombus</i> | <i>Bombus trifasciatus</i> |                           |
| GBAH1817419  | <i>Bombus</i> | <i>Bombus trifasciatus</i> |                           |
| GBAH1817619  | <i>Bombus</i> | <i>Bombus trifasciatus</i> |                           |
| GBAH1817919  | <i>Bombus</i> | <i>Bombus trifasciatus</i> |                           |
| GBAH1818019  | <i>Bombus</i> | <i>Bombus trifasciatus</i> |                           |
| GBAH1819119  | <i>Bombus</i> | <i>Bombus trifasciatus</i> |                           |
| GBAH706910   | <i>Bombus</i> | <i>Bombus trifasciatus</i> |                           |
| GBAH707010   | <i>Bombus</i> | <i>Bombus trifasciatus</i> |                           |
| GBAH707110   | <i>Bombus</i> | <i>Bombus trifasciatus</i> |                           |
| GBAH707210   | <i>Bombus</i> | <i>Bombus trifasciatus</i> |                           |
| GBAH707310   | <i>Bombus</i> | <i>Bombus trifasciatus</i> |                           |
| GBAH707410   | <i>Bombus</i> | <i>Bombus trifasciatus</i> |                           |
| GBAH707510   | <i>Bombus</i> | <i>Bombus trifasciatus</i> |                           |
| GBAH707610   | <i>Bombus</i> | <i>Bombus trifasciatus</i> |                           |
| GBAH707710   | <i>Bombus</i> | <i>Bombus trifasciatus</i> |                           |
| GBAH707810   | <i>Bombus</i> | <i>Bombus trifasciatus</i> |                           |
| GBAH707910   | <i>Bombus</i> | <i>Bombus trifasciatus</i> |                           |
| GBAH708010   | <i>Bombus</i> | <i>Bombus trifasciatus</i> |                           |
| GBAH708110   | <i>Bombus</i> | <i>Bombus trifasciatus</i> |                           |
| GBAH708210   | <i>Bombus</i> | <i>Bombus trifasciatus</i> |                           |
| GBAH708310   | <i>Bombus</i> | <i>Bombus trifasciatus</i> |                           |
| GBAH708410   | <i>Bombus</i> | <i>Bombus trifasciatus</i> |                           |
| GBAH708510   | <i>Bombus</i> | <i>Bombus trifasciatus</i> |                           |
| GBAH708610   | <i>Bombus</i> | <i>Bombus trifasciatus</i> |                           |
| GBAH708710   | <i>Bombus</i> | <i>Bombus trifasciatus</i> |                           |
| GBAH708810   | <i>Bombus</i> | <i>Bombus trifasciatus</i> |                           |
| GBAH708910   | <i>Bombus</i> | <i>Bombus trifasciatus</i> |                           |
| GBAH709010   | <i>Bombus</i> | <i>Bombus trifasciatus</i> |                           |
| GBAH709110   | <i>Bombus</i> | <i>Bombus trifasciatus</i> |                           |
| GBAH709210   | <i>Bombus</i> | <i>Bombus trifasciatus</i> |                           |
| GBAH709310   | <i>Bombus</i> | <i>Bombus trifasciatus</i> |                           |
| GBAH709410   | <i>Bombus</i> | <i>Bombus trifasciatus</i> |                           |
| GBMIN7278817 | <i>Bombus</i> | <i>Bombus trifasciatus</i> |                           |
| GBMIN7278917 | <i>Bombus</i> | <i>Bombus trifasciatus</i> |                           |
| GBMNB6310220 | <i>Bombus</i> | <i>Bombus trinominatus</i> | <i>Bombus xelajuensis</i> |
| GBMNB6310320 | <i>Bombus</i> | <i>Bombus trinominatus</i> | <i>Bombus xelajuensis</i> |
| GBMNB6310420 | <i>Bombus</i> | <i>Bombus trinominatus</i> | <i>Bombus xelajuensis</i> |
| GBMNB6310520 | <i>Bombus</i> | <i>Bombus trinominatus</i> | <i>Bombus xelajuensis</i> |
| GBMNB6310620 | <i>Bombus</i> | <i>Bombus trinominatus</i> | <i>Bombus xelajuensis</i> |
| BBWP46010    | <i>Bombus</i> | <i>Bombus tunicatus</i>    |                           |
| BBWP46110    | <i>Bombus</i> | <i>Bombus tunicatus</i>    |                           |
| BBWP46210    | <i>Bombus</i> | <i>Bombus tunicatus</i>    |                           |
| BBWP46310    | <i>Bombus</i> | <i>Bombus tunicatus</i>    |                           |
| BBWP51210    | <i>Bombus</i> | <i>Bombus tunicatus</i>    |                           |
| GBMIN7279017 | <i>Bombus</i> | <i>Bombus turneri</i>      |                           |
| BBBO19710    | <i>Bombus</i> | <i>Bombus unicus</i>       |                           |

|              |               |                          |
|--------------|---------------|--------------------------|
| BBBO19810    | <i>Bombus</i> | <i>Bombus unicus</i>     |
| BBBO19910    | <i>Bombus</i> | <i>Bombus unicus</i>     |
| GBAH032406   | <i>Bombus</i> | <i>Bombus ussurensis</i> |
| GBAH032506   | <i>Bombus</i> | <i>Bombus ussurensis</i> |
| GBAH032606   | <i>Bombus</i> | <i>Bombus ussurensis</i> |
| GBAH1784819  | <i>Bombus</i> | <i>Bombus ussurensis</i> |
| GBAH1784919  | <i>Bombus</i> | <i>Bombus ussurensis</i> |
| GBAH1785019  | <i>Bombus</i> | <i>Bombus ussurensis</i> |
| GBAH1785119  | <i>Bombus</i> | <i>Bombus ussurensis</i> |
| GBAH1785219  | <i>Bombus</i> | <i>Bombus ussurensis</i> |
| GBAH1785319  | <i>Bombus</i> | <i>Bombus ussurensis</i> |
| GBAH1785419  | <i>Bombus</i> | <i>Bombus ussurensis</i> |
| GBAH1785519  | <i>Bombus</i> | <i>Bombus ussurensis</i> |
| GBAH709510   | <i>Bombus</i> | <i>Bombus ussurensis</i> |
| GBMIN7279117 | <i>Bombus</i> | <i>Bombus ussurensis</i> |
| GBMIN7279217 | <i>Bombus</i> | <i>Bombus ussurensis</i> |
| GBMIN7279317 | <i>Bombus</i> | <i>Bombus ussurensis</i> |
| GBMIN7279417 | <i>Bombus</i> | <i>Bombus ussurensis</i> |
| GBMIN7279517 | <i>Bombus</i> | <i>Bombus ussurensis</i> |
| GBMIN7279617 | <i>Bombus</i> | <i>Bombus ussurensis</i> |
| GBMIN7279717 | <i>Bombus</i> | <i>Bombus ussurensis</i> |
| GBMIN7279817 | <i>Bombus</i> | <i>Bombus ussurensis</i> |
| GBMIN7279917 | <i>Bombus</i> | <i>Bombus ussurensis</i> |
| GBMIN7280017 | <i>Bombus</i> | <i>Bombus ussurensis</i> |
| GBMIN7280117 | <i>Bombus</i> | <i>Bombus ussurensis</i> |
| GBMIN7280217 | <i>Bombus</i> | <i>Bombus ussurensis</i> |
| GBMIN7280317 | <i>Bombus</i> | <i>Bombus ussurensis</i> |
| GBMIN7280417 | <i>Bombus</i> | <i>Bombus ussurensis</i> |
| GBMIN7280517 | <i>Bombus</i> | <i>Bombus ussurensis</i> |
| GBMIN7280617 | <i>Bombus</i> | <i>Bombus ussurensis</i> |
| GBMIN7280717 | <i>Bombus</i> | <i>Bombus ussurensis</i> |
| GBMIN7280817 | <i>Bombus</i> | <i>Bombus ussurensis</i> |
| GBMIN7280917 | <i>Bombus</i> | <i>Bombus ussurensis</i> |
| GBMIN7281017 | <i>Bombus</i> | <i>Bombus ussurensis</i> |
| GBMIN7281117 | <i>Bombus</i> | <i>Bombus ussurensis</i> |
| GBMIN7281217 | <i>Bombus</i> | <i>Bombus ussurensis</i> |
| GBMIN7281317 | <i>Bombus</i> | <i>Bombus ussurensis</i> |
| GBMIN7281417 | <i>Bombus</i> | <i>Bombus ussurensis</i> |
| GBMIN7281517 | <i>Bombus</i> | <i>Bombus ussurensis</i> |
| GBMIN7281617 | <i>Bombus</i> | <i>Bombus ussurensis</i> |
| GBMIN7281717 | <i>Bombus</i> | <i>Bombus ussurensis</i> |
| GBMIN7281817 | <i>Bombus</i> | <i>Bombus ussurensis</i> |
| GBMIN7281917 | <i>Bombus</i> | <i>Bombus ussurensis</i> |
| GBMIN7282017 | <i>Bombus</i> | <i>Bombus ussurensis</i> |
| GBMIN7282117 | <i>Bombus</i> | <i>Bombus ussurensis</i> |
| GBMIN7282217 | <i>Bombus</i> | <i>Bombus ussurensis</i> |

|              |               |                          |
|--------------|---------------|--------------------------|
| GBMIN7282317 | <i>Bombus</i> | <i>Bombus ussurensis</i> |
| GBMIN7282417 | <i>Bombus</i> | <i>Bombus ussurensis</i> |
| GBMIN7282517 | <i>Bombus</i> | <i>Bombus ussurensis</i> |
| GBMIN7282617 | <i>Bombus</i> | <i>Bombus ussurensis</i> |
| BBHEC13809   | <i>Bombus</i> | <i>Bombus vagans</i>     |
| BBHEC14109   | <i>Bombus</i> | <i>Bombus vagans</i>     |
| BBHEC14509   | <i>Bombus</i> | <i>Bombus vagans</i>     |
| BBHEC14909   | <i>Bombus</i> | <i>Bombus vagans</i>     |
| BBHEC15009   | <i>Bombus</i> | <i>Bombus vagans</i>     |
| BBHEC15209   | <i>Bombus</i> | <i>Bombus vagans</i>     |
| BBHEC15309   | <i>Bombus</i> | <i>Bombus vagans</i>     |
| BBHEC15509   | <i>Bombus</i> | <i>Bombus vagans</i>     |
| BBHYL23210   | <i>Bombus</i> | <i>Bombus vagans</i>     |
| BBHYL23310   | <i>Bombus</i> | <i>Bombus vagans</i>     |
| BBHYL23410   | <i>Bombus</i> | <i>Bombus vagans</i>     |
| BBHYL23610   | <i>Bombus</i> | <i>Bombus vagans</i>     |
| BBHYL27110   | <i>Bombus</i> | <i>Bombus vagans</i>     |
| BBHYL27910   | <i>Bombus</i> | <i>Bombus vagans</i>     |
| BEECB106107  | <i>Bombus</i> | <i>Bombus vagans</i>     |
| BEECD87410   | <i>Bombus</i> | <i>Bombus vagans</i>     |
| BEO00104     | <i>Bombus</i> | <i>Bombus vagans</i>     |
| CNEIE176812  | <i>Bombus</i> | <i>Bombus vagans</i>     |
| CNFDF06814   | <i>Bombus</i> | <i>Bombus vagans</i>     |
| CNF DG02014  | <i>Bombus</i> | <i>Bombus vagans</i>     |
| CNFND03814   | <i>Bombus</i> | <i>Bombus vagans</i>     |
| CNFNF237514  | <i>Bombus</i> | <i>Bombus vagans</i>     |
| CNFNF237714  | <i>Bombus</i> | <i>Bombus vagans</i>     |
| CNFNF239414  | <i>Bombus</i> | <i>Bombus vagans</i>     |
| CNFNF240114  | <i>Bombus</i> | <i>Bombus vagans</i>     |
| CNFNF240214  | <i>Bombus</i> | <i>Bombus vagans</i>     |
| CNFNF240314  | <i>Bombus</i> | <i>Bombus vagans</i>     |
| CNFNF240414  | <i>Bombus</i> | <i>Bombus vagans</i>     |
| CNFNF241714  | <i>Bombus</i> | <i>Bombus vagans</i>     |
| CNFNF241814  | <i>Bombus</i> | <i>Bombus vagans</i>     |
| CNFNF241914  | <i>Bombus</i> | <i>Bombus vagans</i>     |
| CNFNF242014  | <i>Bombus</i> | <i>Bombus vagans</i>     |
| CNFNF242114  | <i>Bombus</i> | <i>Bombus vagans</i>     |
| CNFNF242214  | <i>Bombus</i> | <i>Bombus vagans</i>     |
| CNFNF242914  | <i>Bombus</i> | <i>Bombus vagans</i>     |
| CNFNF243114  | <i>Bombus</i> | <i>Bombus vagans</i>     |
| CNFNF245814  | <i>Bombus</i> | <i>Bombus vagans</i>     |
| CNFNF246414  | <i>Bombus</i> | <i>Bombus vagans</i>     |
| CNFNF246714  | <i>Bombus</i> | <i>Bombus vagans</i>     |
| CNFNF271314  | <i>Bombus</i> | <i>Bombus vagans</i>     |
| CNFNF271614  | <i>Bombus</i> | <i>Bombus vagans</i>     |
| CNFNF271714  | <i>Bombus</i> | <i>Bombus vagans</i>     |



|             |               |                      |
|-------------|---------------|----------------------|
| CNFNF272214 | <i>Bombus</i> | <i>Bombus vagans</i> |
| CNFNF273214 | <i>Bombus</i> | <i>Bombus vagans</i> |
| CNFNF275014 | <i>Bombus</i> | <i>Bombus vagans</i> |
| CNFNF275514 | <i>Bombus</i> | <i>Bombus vagans</i> |
| CNFNF276514 | <i>Bombus</i> | <i>Bombus vagans</i> |
| CNFNG135814 | <i>Bombus</i> | <i>Bombus vagans</i> |
| CNFNG137314 | <i>Bombus</i> | <i>Bombus vagans</i> |
| CNFNH16614  | <i>Bombus</i> | <i>Bombus vagans</i> |
| CNFNH16714  | <i>Bombus</i> | <i>Bombus vagans</i> |
| CNFNN00414  | <i>Bombus</i> | <i>Bombus vagans</i> |
| CNFNR198814 | <i>Bombus</i> | <i>Bombus vagans</i> |
| CNFNR199814 | <i>Bombus</i> | <i>Bombus vagans</i> |
| CNFNR199914 | <i>Bombus</i> | <i>Bombus vagans</i> |
| CNFNR201314 | <i>Bombus</i> | <i>Bombus vagans</i> |
| CNFNR201414 | <i>Bombus</i> | <i>Bombus vagans</i> |
| CNFNR385414 | <i>Bombus</i> | <i>Bombus vagans</i> |
| CNFNR385714 | <i>Bombus</i> | <i>Bombus vagans</i> |
| CNFNR387314 | <i>Bombus</i> | <i>Bombus vagans</i> |
| CNFNR387714 | <i>Bombus</i> | <i>Bombus vagans</i> |
| CNFNR387914 | <i>Bombus</i> | <i>Bombus vagans</i> |
| CNFNR389414 | <i>Bombus</i> | <i>Bombus vagans</i> |
| CNFNR389614 | <i>Bombus</i> | <i>Bombus vagans</i> |
| CNFNR389914 | <i>Bombus</i> | <i>Bombus vagans</i> |
| CNFNR390014 | <i>Bombus</i> | <i>Bombus vagans</i> |
| CNFNR392114 | <i>Bombus</i> | <i>Bombus vagans</i> |
| CNFNR392214 | <i>Bombus</i> | <i>Bombus vagans</i> |
| CNFNR392314 | <i>Bombus</i> | <i>Bombus vagans</i> |
| CNFNR394614 | <i>Bombus</i> | <i>Bombus vagans</i> |
| CNFNR394714 | <i>Bombus</i> | <i>Bombus vagans</i> |
| CNFNR395014 | <i>Bombus</i> | <i>Bombus vagans</i> |
| CNFNR396414 | <i>Bombus</i> | <i>Bombus vagans</i> |
| CNFNR396614 | <i>Bombus</i> | <i>Bombus vagans</i> |
| CNFNR396714 | <i>Bombus</i> | <i>Bombus vagans</i> |
| CNFNR396814 | <i>Bombus</i> | <i>Bombus vagans</i> |
| CNFNR396914 | <i>Bombus</i> | <i>Bombus vagans</i> |
| CNFNR399814 | <i>Bombus</i> | <i>Bombus vagans</i> |
| CNFNS13214  | <i>Bombus</i> | <i>Bombus vagans</i> |
| CNFNS13314  | <i>Bombus</i> | <i>Bombus vagans</i> |
| CNFNS14814  | <i>Bombus</i> | <i>Bombus vagans</i> |
| CNFNS15514  | <i>Bombus</i> | <i>Bombus vagans</i> |
| CNFNS15614  | <i>Bombus</i> | <i>Bombus vagans</i> |
| CNFNS15714  | <i>Bombus</i> | <i>Bombus vagans</i> |
| CNFNT213414 | <i>Bombus</i> | <i>Bombus vagans</i> |
| CNFNT213614 | <i>Bombus</i> | <i>Bombus vagans</i> |
| CNFNT213914 | <i>Bombus</i> | <i>Bombus vagans</i> |
| CNFNT214014 | <i>Bombus</i> | <i>Bombus vagans</i> |

|             |               |                      |
|-------------|---------------|----------------------|
| CNLME05614  | <i>Bombus</i> | <i>Bombus vagans</i> |
| CNLME05714  | <i>Bombus</i> | <i>Bombus vagans</i> |
| CNLML05614  | <i>Bombus</i> | <i>Bombus vagans</i> |
| CNPKG147714 | <i>Bombus</i> | <i>Bombus vagans</i> |
| CNPKG147814 | <i>Bombus</i> | <i>Bombus vagans</i> |
| CNPKG147914 | <i>Bombus</i> | <i>Bombus vagans</i> |
| CNPKG148414 | <i>Bombus</i> | <i>Bombus vagans</i> |
| CNPKG148614 | <i>Bombus</i> | <i>Bombus vagans</i> |
| CNPKH09514  | <i>Bombus</i> | <i>Bombus vagans</i> |
| CNPKH09614  | <i>Bombus</i> | <i>Bombus vagans</i> |
| CNPKI160014 | <i>Bombus</i> | <i>Bombus vagans</i> |
| CNRGG03515  | <i>Bombus</i> | <i>Bombus vagans</i> |
| CNRMC126812 | <i>Bombus</i> | <i>Bombus vagans</i> |
| CNRMD243212 | <i>Bombus</i> | <i>Bombus vagans</i> |
| CNRME75712  | <i>Bombus</i> | <i>Bombus vagans</i> |
| CNRME75912  | <i>Bombus</i> | <i>Bombus vagans</i> |
| CNRME79612  | <i>Bombus</i> | <i>Bombus vagans</i> |
| CNRME79812  | <i>Bombus</i> | <i>Bombus vagans</i> |
| CNRMF53612  | <i>Bombus</i> | <i>Bombus vagans</i> |
| CNRVB02815  | <i>Bombus</i> | <i>Bombus vagans</i> |
| CNSLB43912  | <i>Bombus</i> | <i>Bombus vagans</i> |
| CNWLE237012 | <i>Bombus</i> | <i>Bombus vagans</i> |
| CNWLF197712 | <i>Bombus</i> | <i>Bombus vagans</i> |
| CNWLF205112 | <i>Bombus</i> | <i>Bombus vagans</i> |
| CNWLG96112  | <i>Bombus</i> | <i>Bombus vagans</i> |
| GBAH617409  | <i>Bombus</i> | <i>Bombus vagans</i> |
| GMOAG15915  | <i>Bombus</i> | <i>Bombus vagans</i> |
| HCBNS12903  | <i>Bombus</i> | <i>Bombus vagans</i> |
| HCBNS13003  | <i>Bombus</i> | <i>Bombus vagans</i> |
| HCBNS20203  | <i>Bombus</i> | <i>Bombus vagans</i> |
| HCBNS20303  | <i>Bombus</i> | <i>Bombus vagans</i> |
| HCBNS20403  | <i>Bombus</i> | <i>Bombus vagans</i> |
| HGPPH01810  | <i>Bombus</i> | <i>Bombus vagans</i> |
| HGPPH08710  | <i>Bombus</i> | <i>Bombus vagans</i> |
| HPPPH93613  | <i>Bombus</i> | <i>Bombus vagans</i> |
| HPPPH93713  | <i>Bombus</i> | <i>Bombus vagans</i> |
| HPPPI131813 | <i>Bombus</i> | <i>Bombus vagans</i> |
| HPPPK112913 | <i>Bombus</i> | <i>Bombus vagans</i> |
| HPPPL58613  | <i>Bombus</i> | <i>Bombus vagans</i> |
| JSAUG169011 | <i>Bombus</i> | <i>Bombus vagans</i> |
| JSAUG169211 | <i>Bombus</i> | <i>Bombus vagans</i> |
| JSHYN32711  | <i>Bombus</i> | <i>Bombus vagans</i> |
| JSJUL239111 | <i>Bombus</i> | <i>Bombus vagans</i> |
| JSJUL239211 | <i>Bombus</i> | <i>Bombus vagans</i> |
| MBIOG01013  | <i>Bombus</i> | <i>Bombus vagans</i> |
| MBIOI102013 | <i>Bombus</i> | <i>Bombus vagans</i> |

|              |               |                              |
|--------------|---------------|------------------------------|
| MBIOJ02313   | <i>Bombus</i> | <i>Bombus vagans</i>         |
| OPPCC164317  | <i>Bombus</i> | <i>Bombus vagans</i>         |
| OPPDE304017  | <i>Bombus</i> | <i>Bombus vagans</i>         |
| OPPDE304117  | <i>Bombus</i> | <i>Bombus vagans</i>         |
| OPPDE304217  | <i>Bombus</i> | <i>Bombus vagans</i>         |
| OPPEG262217  | <i>Bombus</i> | <i>Bombus vagans</i>         |
| OPPEG263117  | <i>Bombus</i> | <i>Bombus vagans</i>         |
| OPPIC31617   | <i>Bombus</i> | <i>Bombus vagans</i>         |
| OPPUC01317   | <i>Bombus</i> | <i>Bombus vagans</i>         |
| PAJUN144312  | <i>Bombus</i> | <i>Bombus vagans</i>         |
| PHOCT92511   | <i>Bombus</i> | <i>Bombus vagans</i>         |
| SMTPD33013   | <i>Bombus</i> | <i>Bombus vagans</i>         |
| SMTPJ116014  | <i>Bombus</i> | <i>Bombus vagans</i>         |
| SMTPJ47514   | <i>Bombus</i> | <i>Bombus vagans</i>         |
| SMTPJ47814   | <i>Bombus</i> | <i>Bombus vagans</i>         |
| SMTPP456115  | <i>Bombus</i> | <i>Bombus vagans</i>         |
| SSGGB438114  | <i>Bombus</i> | <i>Bombus vagans</i>         |
| SSGGB441314  | <i>Bombus</i> | <i>Bombus vagans</i>         |
| SSPAC336613  | <i>Bombus</i> | <i>Bombus vagans</i>         |
| SSWLD790313  | <i>Bombus</i> | <i>Bombus vagans</i>         |
| SSWLD790613  | <i>Bombus</i> | <i>Bombus vagans</i>         |
| SSWLD790713  | <i>Bombus</i> | <i>Bombus vagans</i>         |
| TTHYW13808   | <i>Bombus</i> | <i>Bombus vagans</i>         |
| TTHYW13908   | <i>Bombus</i> | <i>Bombus vagans</i>         |
| TTHYW14008   | <i>Bombus</i> | <i>Bombus vagans</i>         |
| TTHYW14108   | <i>Bombus</i> | <i>Bombus vagans</i>         |
| TTHYW58408   | <i>Bombus</i> | <i>Bombus vagans</i>         |
| TTHYW59108   | <i>Bombus</i> | <i>Bombus vagans</i>         |
| TTHYW59708   | <i>Bombus</i> | <i>Bombus vagans</i>         |
| TTHYW64408   | <i>Bombus</i> | <i>Bombus vagans</i>         |
| TTHYW64908   | <i>Bombus</i> | <i>Bombus vagans</i>         |
| TTHYW65008   | <i>Bombus</i> | <i>Bombus vagans</i>         |
| TTHYW65708   | <i>Bombus</i> | <i>Bombus vagans</i>         |
| GBMNB6299820 | <i>Bombus</i> | <i>Bombus vancouverensis</i> |
| GBMNB6299920 | <i>Bombus</i> | <i>Bombus vancouverensis</i> |
| GBMNB6300020 | <i>Bombus</i> | <i>Bombus vancouverensis</i> |
| GBMNB6300120 | <i>Bombus</i> | <i>Bombus vancouverensis</i> |
| GBMNB6300220 | <i>Bombus</i> | <i>Bombus vancouverensis</i> |
| GBMNB6300320 | <i>Bombus</i> | <i>Bombus vancouverensis</i> |
| GBMNB6300420 | <i>Bombus</i> | <i>Bombus vancouverensis</i> |
| GBMNB6300520 | <i>Bombus</i> | <i>Bombus vancouverensis</i> |
| GBMNB6300620 | <i>Bombus</i> | <i>Bombus vancouverensis</i> |
| GBMNB6300720 | <i>Bombus</i> | <i>Bombus vancouverensis</i> |
| GBMNB6300820 | <i>Bombus</i> | <i>Bombus vancouverensis</i> |
| GBMNB6300920 | <i>Bombus</i> | <i>Bombus vancouverensis</i> |
| GBMNB6301020 | <i>Bombus</i> | <i>Bombus vancouverensis</i> |



|              |               |                              |
|--------------|---------------|------------------------------|
| GBMNB6305720 | <i>Bombus</i> | <i>Bombus vancouverensis</i> |
| GBMNB6305820 | <i>Bombus</i> | <i>Bombus vancouverensis</i> |
| GBMNB6305920 | <i>Bombus</i> | <i>Bombus vancouverensis</i> |
| GBMNB6306020 | <i>Bombus</i> | <i>Bombus vancouverensis</i> |
| GBMNB6306120 | <i>Bombus</i> | <i>Bombus vancouverensis</i> |
| GBMNB6306220 | <i>Bombus</i> | <i>Bombus vancouverensis</i> |
| GBMNB6306320 | <i>Bombus</i> | <i>Bombus vancouverensis</i> |
| GBMNB6306420 | <i>Bombus</i> | <i>Bombus vancouverensis</i> |
| GBMNB6306520 | <i>Bombus</i> | <i>Bombus vancouverensis</i> |
| GBMNB6306620 | <i>Bombus</i> | <i>Bombus vancouverensis</i> |
| GBMNB6306720 | <i>Bombus</i> | <i>Bombus vancouverensis</i> |
| GBMNB6306820 | <i>Bombus</i> | <i>Bombus vancouverensis</i> |
| GBMNB6306920 | <i>Bombus</i> | <i>Bombus vancouverensis</i> |
| GBMNB6307020 | <i>Bombus</i> | <i>Bombus vancouverensis</i> |
| GBMNB6307120 | <i>Bombus</i> | <i>Bombus vancouverensis</i> |
| GBMNB6307220 | <i>Bombus</i> | <i>Bombus vancouverensis</i> |
| GBMNB6307320 | <i>Bombus</i> | <i>Bombus vancouverensis</i> |
| GBMNB6307420 | <i>Bombus</i> | <i>Bombus vancouverensis</i> |
| GBMNB6307520 | <i>Bombus</i> | <i>Bombus vancouverensis</i> |
| GBMNB6307620 | <i>Bombus</i> | <i>Bombus vancouverensis</i> |
| GBMNB6307720 | <i>Bombus</i> | <i>Bombus vancouverensis</i> |
| GBMNB6307820 | <i>Bombus</i> | <i>Bombus vancouverensis</i> |
| GBMNB6307920 | <i>Bombus</i> | <i>Bombus vancouverensis</i> |
| GBMNB6308020 | <i>Bombus</i> | <i>Bombus vancouverensis</i> |
| GBMNB6308120 | <i>Bombus</i> | <i>Bombus vancouverensis</i> |
| GBMNB6308220 | <i>Bombus</i> | <i>Bombus vancouverensis</i> |
| GBMNB6308320 | <i>Bombus</i> | <i>Bombus vancouverensis</i> |
| GBMNB6308420 | <i>Bombus</i> | <i>Bombus vancouverensis</i> |
| GBMNB6308520 | <i>Bombus</i> | <i>Bombus vancouverensis</i> |
| GBMNB6308620 | <i>Bombus</i> | <i>Bombus vancouverensis</i> |
| GBMNB6308720 | <i>Bombus</i> | <i>Bombus vancouverensis</i> |
| GBMNB6308820 | <i>Bombus</i> | <i>Bombus vancouverensis</i> |
| GBAH1701419  | <i>Bombus</i> | <i>Bombus vandykei</i>       |
| GBAH1701519  | <i>Bombus</i> | <i>Bombus vandykei</i>       |
| GBAH1701619  | <i>Bombus</i> | <i>Bombus vandykei</i>       |
| GBMNB6114420 | <i>Bombus</i> | <i>Bombus variabilis</i>     |
| GBMNB6115520 | <i>Bombus</i> | <i>Bombus variabilis</i>     |
| GBMNB6308920 | <i>Bombus</i> | <i>Bombus variabilis</i>     |
| GBMNB6309020 | <i>Bombus</i> | <i>Bombus variabilis</i>     |
| BEEEE03515   | <i>Bombus</i> | <i>Bombus vestalis</i>       |
| BEEEE31916   | <i>Bombus</i> | <i>Bombus vestalis</i>       |
| FBAPD62711   | <i>Bombus</i> | <i>Bombus vestalis</i>       |
| FBAPD62811   | <i>Bombus</i> | <i>Bombus vestalis</i>       |
| FBAPD63011   | <i>Bombus</i> | <i>Bombus vestalis</i>       |
| FBHAP85509   | <i>Bombus</i> | <i>Bombus vestalis</i>       |
| GBACU230613  | <i>Bombus</i> | <i>Bombus vestalis</i>       |

|              |               |                            |
|--------------|---------------|----------------------------|
| GBACU230713  | <i>Bombus</i> | <i>Bombus vestalis</i>     |
| GBACU348113  | <i>Bombus</i> | <i>Bombus vestalis</i>     |
| GBACU348213  | <i>Bombus</i> | <i>Bombus vestalis</i>     |
| GBACU348313  | <i>Bombus</i> | <i>Bombus vestalis</i>     |
| GBACU348413  | <i>Bombus</i> | <i>Bombus vestalis</i>     |
| GBAH075806   | <i>Bombus</i> | <i>Bombus vestalis</i>     |
| GBAH1843019  | <i>Bombus</i> | <i>Bombus vestalis</i>     |
| GBMIN7282717 | <i>Bombus</i> | <i>Bombus vestalis</i>     |
| GBMIN7282817 | <i>Bombus</i> | <i>Bombus vestalis</i>     |
| GMGMA45614   | <i>Bombus</i> | <i>Bombus vestalis</i>     |
| GMGMC19914   | <i>Bombus</i> | <i>Bombus vestalis</i>     |
| GMGMC20514   | <i>Bombus</i> | <i>Bombus vestalis</i>     |
| GMGMC23014   | <i>Bombus</i> | <i>Bombus vestalis</i>     |
| GMGMH145214  | <i>Bombus</i> | <i>Bombus vestalis</i>     |
| GMGMM14614   | <i>Bombus</i> | <i>Bombus vestalis</i>     |
| GMGMM15714   | <i>Bombus</i> | <i>Bombus vestalis</i>     |
| GMGMM18314   | <i>Bombus</i> | <i>Bombus vestalis</i>     |
| GMGMM18614   | <i>Bombus</i> | <i>Bombus vestalis</i>     |
| GMGMN00114   | <i>Bombus</i> | <i>Bombus vestalis</i>     |
| GMGMN04114   | <i>Bombus</i> | <i>Bombus vestalis</i>     |
| GMGMN16514   | <i>Bombus</i> | <i>Bombus vestalis</i>     |
| POLLE08218   | <i>Bombus</i> | <i>Bombus vestalis</i>     |
| POLLE08318   | <i>Bombus</i> | <i>Bombus vestalis</i>     |
| POLLE12718   | <i>Bombus</i> | <i>Bombus vestalis</i>     |
| POLLE16418   | <i>Bombus</i> | <i>Bombus vestalis</i>     |
| POLLE180219  | <i>Bombus</i> | <i>Bombus vestalis</i>     |
| POLLE184719  | <i>Bombus</i> | <i>Bombus vestalis</i>     |
| POLLE196619  | <i>Bombus</i> | <i>Bombus vestalis</i>     |
| POLLE201119  | <i>Bombus</i> | <i>Bombus vestalis</i>     |
| POLLE226819  | <i>Bombus</i> | <i>Bombus vestalis</i>     |
| POLLE295419  | <i>Bombus</i> | <i>Bombus vestalis</i>     |
| FBSYM28710   | <i>Bombus</i> | <i>Bombus veteranus</i>    |
| BBHYL25510   | <i>Bombus</i> | <i>Bombus vosnesenskii</i> |
| BEECB62007   | <i>Bombus</i> | <i>Bombus vosnesenskii</i> |
| GBMNB6309120 | <i>Bombus</i> | <i>Bombus vosnesenskii</i> |
| GBMNB6309220 | <i>Bombus</i> | <i>Bombus vosnesenskii</i> |
| GBMNB6309320 | <i>Bombus</i> | <i>Bombus vosnesenskii</i> |
| GBMNB6309420 | <i>Bombus</i> | <i>Bombus vosnesenskii</i> |
| GBMNB6309520 | <i>Bombus</i> | <i>Bombus vosnesenskii</i> |
| GBMNB6309620 | <i>Bombus</i> | <i>Bombus vosnesenskii</i> |
| GBMIN7282917 | <i>Bombus</i> | <i>Bombus waltoni</i>      |
| ASBEE04108   | <i>Bombus</i> | <i>Bombus wangae</i>       |
| ASBEE04208   | <i>Bombus</i> | <i>Bombus wangae</i>       |
| ASBEE13508   | <i>Bombus</i> | <i>Bombus wangae</i>       |
| ASBEE13608   | <i>Bombus</i> | <i>Bombus wangae</i>       |
| GBAH1843119  | <i>Bombus</i> | <i>Bombus weisi</i>        |

|              |                   |                                |
|--------------|-------------------|--------------------------------|
| GBMNB6121320 | <i>Bombus</i>     | <i>Bombus weisi</i>            |
| GBMNB6122720 | <i>Bombus</i>     | <i>Bombus weisi</i>            |
| GBMNB6309720 | <i>Bombus</i>     | <i>Bombus weisi</i>            |
| GBMNB6309820 | <i>Bombus</i>     | <i>Bombus weisi</i>            |
| FBAPC71911   | <i>Bombus</i>     | <i>Bombus wurflenii</i>        |
| FBAPC72011   | <i>Bombus</i>     | <i>Bombus wurflenii</i>        |
| FBAPC72111   | <i>Bombus</i>     | <i>Bombus wurflenii</i>        |
| FBAPD61611   | <i>Bombus</i>     | <i>Bombus wurflenii</i>        |
| FBAPD61811   | <i>Bombus</i>     | <i>Bombus wurflenii</i>        |
| FBAPD61911   | <i>Bombus</i>     | <i>Bombus wurflenii</i>        |
| FBHAP81109   | <i>Bombus</i>     | <i>Bombus wurflenii</i>        |
| GBAH073606   | <i>Bombus</i>     | <i>Bombus wurflenii</i>        |
| GBAH073706   | <i>Bombus</i>     | <i>Bombus wurflenii</i>        |
| GBAH073806   | <i>Bombus</i>     | <i>Bombus wurflenii</i>        |
| GBAH073906   | <i>Bombus</i>     | <i>Bombus wurflenii</i>        |
| GBAH706010   | <i>Bombus</i>     | <i>Bombus wurflenii</i>        |
| GBMNB6226120 | <i>Bombus</i>     | <i>Bombus wurflenii</i>        |
| GBMNB6226720 | <i>Bombus</i>     | <i>Bombus wurflenii</i>        |
| GBHAP16113   | <i>Braunsapis</i> | <i>Braunsapis elizabethana</i> |
| GBMIN7336117 | <i>Braunsapis</i> | <i>Braunsapis hewitti</i>      |
| GBMIN7336217 | <i>Braunsapis</i> | <i>Braunsapis hewitti</i>      |
| GBHAP16313   | <i>Braunsapis</i> | <i>Braunsapis hirsuta</i>      |
| DOBEE08915   | <i>Braunsapis</i> | <i>Braunsapis mixta</i>        |
| GBMIN7336317 | <i>Braunsapis</i> | <i>Braunsapis mixta</i>        |
| SABEE37815   | <i>Braunsapis</i> | <i>Braunsapis mixta</i>        |
| SABEE57815   | <i>Braunsapis</i> | <i>Braunsapis mixta</i>        |
| SABEE60515   | <i>Braunsapis</i> | <i>Braunsapis mixta</i>        |
| SABEE62315   | <i>Braunsapis</i> | <i>Braunsapis mixta</i>        |
| SABEE64115   | <i>Braunsapis</i> | <i>Braunsapis mixta</i>        |
| SABEE64315   | <i>Braunsapis</i> | <i>Braunsapis mixta</i>        |
| GBHAP16013   | <i>Braunsapis</i> | <i>Braunsapis picitarsis</i>   |
| DOBEE63915   | <i>Braunsapis</i> | <i>Braunsapis puangensis</i>   |
| DOBEE65815   | <i>Braunsapis</i> | <i>Braunsapis puangensis</i>   |
| DOBEE67615   | <i>Braunsapis</i> | <i>Braunsapis puangensis</i>   |
| GBAH1614119  | <i>Braunsapis</i> | <i>Braunsapis puangensis</i>   |
| GBAH1669019  | <i>Braunsapis</i> | <i>Braunsapis puangensis</i>   |
| GBMIN7336417 | <i>Braunsapis</i> | <i>Braunsapis puangensis</i>   |
| MAHYM30910   | <i>Braunsapis</i> | <i>Braunsapis puangensis</i>   |
| MSAPB00211   | <i>Braunsapis</i> | <i>Braunsapis puangensis</i>   |
| MSAPB00511   | <i>Braunsapis</i> | <i>Braunsapis puangensis</i>   |
| MSAPB00611   | <i>Braunsapis</i> | <i>Braunsapis puangensis</i>   |
| MSAPB00711   | <i>Braunsapis</i> | <i>Braunsapis puangensis</i>   |
| MSAPB04611   | <i>Braunsapis</i> | <i>Braunsapis puangensis</i>   |
| MSAPB04711   | <i>Braunsapis</i> | <i>Braunsapis puangensis</i>   |
| MSAPB04811   | <i>Braunsapis</i> | <i>Braunsapis puangensis</i>   |
| MSAPB04911   | <i>Braunsapis</i> | <i>Braunsapis puangensis</i>   |

|             |                   |                              |
|-------------|-------------------|------------------------------|
| MSAPB05011  | <i>Braunsapis</i> | <i>Braunsapis puangensis</i> |
| MSAPB05111  | <i>Braunsapis</i> | <i>Braunsapis puangensis</i> |
| MSAPB05211  | <i>Braunsapis</i> | <i>Braunsapis puangensis</i> |
| MSAPB05311  | <i>Braunsapis</i> | <i>Braunsapis puangensis</i> |
| MSAPB05411  | <i>Braunsapis</i> | <i>Braunsapis puangensis</i> |
| MSAPB05711  | <i>Braunsapis</i> | <i>Braunsapis puangensis</i> |
| MSAPB05811  | <i>Braunsapis</i> | <i>Braunsapis puangensis</i> |
| MSAPB05911  | <i>Braunsapis</i> | <i>Braunsapis puangensis</i> |
| MSAPB06011  | <i>Braunsapis</i> | <i>Braunsapis puangensis</i> |
| MSAPB116012 | <i>Braunsapis</i> | <i>Braunsapis puangensis</i> |
| MSAPB116112 | <i>Braunsapis</i> | <i>Braunsapis puangensis</i> |
| MSAPB15211  | <i>Braunsapis</i> | <i>Braunsapis puangensis</i> |
| MSAPB15311  | <i>Braunsapis</i> | <i>Braunsapis puangensis</i> |
| MSAPB15511  | <i>Braunsapis</i> | <i>Braunsapis puangensis</i> |
| MSAPB15611  | <i>Braunsapis</i> | <i>Braunsapis puangensis</i> |
| MSAPB16911  | <i>Braunsapis</i> | <i>Braunsapis puangensis</i> |
| MSAPB17011  | <i>Braunsapis</i> | <i>Braunsapis puangensis</i> |
| MSAPB17111  | <i>Braunsapis</i> | <i>Braunsapis puangensis</i> |
| MSAPB17211  | <i>Braunsapis</i> | <i>Braunsapis puangensis</i> |
| MSAPB17411  | <i>Braunsapis</i> | <i>Braunsapis puangensis</i> |
| MSAPB17511  | <i>Braunsapis</i> | <i>Braunsapis puangensis</i> |
| MSAPB17611  | <i>Braunsapis</i> | <i>Braunsapis puangensis</i> |
| MSAPB18211  | <i>Braunsapis</i> | <i>Braunsapis puangensis</i> |
| MSAPB18311  | <i>Braunsapis</i> | <i>Braunsapis puangensis</i> |
| MSAPB18411  | <i>Braunsapis</i> | <i>Braunsapis puangensis</i> |
| MSAPB23411  | <i>Braunsapis</i> | <i>Braunsapis puangensis</i> |
| MSAPB23711  | <i>Braunsapis</i> | <i>Braunsapis puangensis</i> |
| MSAPB23811  | <i>Braunsapis</i> | <i>Braunsapis puangensis</i> |
| MSAPB25211  | <i>Braunsapis</i> | <i>Braunsapis puangensis</i> |
| MSAPB25311  | <i>Braunsapis</i> | <i>Braunsapis puangensis</i> |
| MSAPB25411  | <i>Braunsapis</i> | <i>Braunsapis puangensis</i> |
| MSAPB26111  | <i>Braunsapis</i> | <i>Braunsapis puangensis</i> |
| MSAPB26411  | <i>Braunsapis</i> | <i>Braunsapis puangensis</i> |
| MSAPB26511  | <i>Braunsapis</i> | <i>Braunsapis puangensis</i> |
| MSAPB26611  | <i>Braunsapis</i> | <i>Braunsapis puangensis</i> |
| MSAPB26711  | <i>Braunsapis</i> | <i>Braunsapis puangensis</i> |
| MSAPB27511  | <i>Braunsapis</i> | <i>Braunsapis puangensis</i> |
| MSAPB27611  | <i>Braunsapis</i> | <i>Braunsapis puangensis</i> |
| MSAPB28411  | <i>Braunsapis</i> | <i>Braunsapis puangensis</i> |
| MSAPB29111  | <i>Braunsapis</i> | <i>Braunsapis puangensis</i> |
| MSAPB30111  | <i>Braunsapis</i> | <i>Braunsapis puangensis</i> |
| MSAPB30211  | <i>Braunsapis</i> | <i>Braunsapis puangensis</i> |
| SABEE38315  | <i>Braunsapis</i> | <i>Braunsapis puangensis</i> |
| SABEE38415  | <i>Braunsapis</i> | <i>Braunsapis puangensis</i> |
| SABEE38715  | <i>Braunsapis</i> | <i>Braunsapis puangensis</i> |
| SABEE52415  | <i>Braunsapis</i> | <i>Braunsapis puangensis</i> |



|              |                    |                                 |
|--------------|--------------------|---------------------------------|
| SABEE56015   | <i>Braunsapis</i>  | <i>Braunsapis puangensis</i>    |
| SABEE59415   | <i>Braunsapis</i>  | <i>Braunsapis puangensis</i>    |
| SABEE59515   | <i>Braunsapis</i>  | <i>Braunsapis puangensis</i>    |
| SABEE60015   | <i>Braunsapis</i>  | <i>Braunsapis puangensis</i>    |
| SABEE60115   | <i>Braunsapis</i>  | <i>Braunsapis puangensis</i>    |
| SABEE61415   | <i>Braunsapis</i>  | <i>Braunsapis puangensis</i>    |
| SABEE62115   | <i>Braunsapis</i>  | <i>Braunsapis puangensis</i>    |
| SABEE64815   | <i>Braunsapis</i>  | <i>Braunsapis puangensis</i>    |
| SABEE64915   | <i>Braunsapis</i>  | <i>Braunsapis puangensis</i>    |
| SABEE65315   | <i>Braunsapis</i>  | <i>Braunsapis puangensis</i>    |
| SABEE65615   | <i>Braunsapis</i>  | <i>Braunsapis puangensis</i>    |
| SABEE66815   | <i>Braunsapis</i>  | <i>Braunsapis puangensis</i>    |
| GBMIN894212  | <i>Braunsapis</i>  | <i>Braunsapis trochanterata</i> |
| GBAH189306   | <i>Braunsapis</i>  | <i>Braunsapis unicolor</i>      |
| GBAH189206   | <i>Braunsapis</i>  | <i>Braunsapis vitrea</i>        |
| BOFTW00508   | <i>Caenonomada</i> | <i>Caenonomada bruneri</i>      |
| GBMNB6310720 | <i>Caenonomada</i> | <i>Caenonomada bruneri</i>      |
| LASNA35208   | <i>Caenonomada</i> | <i>Caenonomada labrata</i>      |
| LASNA44608   | <i>Caenonomada</i> | <i>Caenonomada labrata</i>      |
| GBMNB6248220 | <i>Caenonomada</i> | <i>Caenonomada unicalcarata</i> |
| GBMNB6310820 | <i>Caenonomada</i> | <i>Caenonomada unicalcarata</i> |
| LASNA35308   | <i>Caenonomada</i> | <i>Caenonomada unicalcarata</i> |
| BBHYA03412   | <i>Centris</i>     | <i>Centris atripes</i>          |
| BBHYA03612   | <i>Centris</i>     | <i>Centris atripes</i>          |
| BBHYA03712   | <i>Centris</i>     | <i>Centris atripes</i>          |
| BBHYA03812   | <i>Centris</i>     | <i>Centris atripes</i>          |
| BBHYA04412   | <i>Centris</i>     | <i>Centris atripes</i>          |
| BBHYA04512   | <i>Centris</i>     | <i>Centris atripes</i>          |
| BEECC21208   | <i>Centris</i>     | <i>Centris atripes</i>          |
| HMBME13707   | <i>Centris</i>     | <i>Centris atripes</i>          |
| HMBME15207   | <i>Centris</i>     | <i>Centris atripes</i>          |
| BBHYA03512   | <i>Centris</i>     | <i>Centris caesalpiniae</i>     |
| BBHYA04012   | <i>Centris</i>     | <i>Centris caesalpiniae</i>     |
| BBHYA04112   | <i>Centris</i>     | <i>Centris caesalpiniae</i>     |
| BBHYA04212   | <i>Centris</i>     | <i>Centris caesalpiniae</i>     |
| BBHYA04312   | <i>Centris</i>     | <i>Centris caesalpiniae</i>     |
| BEECA83207   | <i>Centris</i>     | <i>Centris decolorata</i>       |
| BEECA83307   | <i>Centris</i>     | <i>Centris decolorata</i>       |
| BEECA82807   | <i>Centris</i>     | <i>Centris fasciata</i>         |
| BEECA83407   | <i>Centris</i>     | <i>Centris haemorrhoidalis</i>  |
| BEECC22208   | <i>Centris</i>     | <i>Centris hoffmanseggiae</i>   |
| BEECA76607   | <i>Centris</i>     | <i>Centris lanipes</i>          |
| ASINH124712  | <i>Centris</i>     | <i>Centris lutea</i>            |
| HMBME10907   | <i>Centris</i>     | <i>Centris nitida</i>           |
| HMBME14007   | <i>Centris</i>     | <i>Centris nitida</i>           |
| HMBME14207   | <i>Centris</i>     | <i>Centris nitida</i>           |

|             |                       |                                 |                            |
|-------------|-----------------------|---------------------------------|----------------------------|
| BBHYA04612  | <i>Centris</i>        | <i>Centris rhodopus</i>         |                            |
| BBHYA87312  | <i>Centris</i>        | <i>Centris rhodopus</i>         |                            |
| BEECC21908  | <i>Centris</i>        | <i>Centris rhodopus</i>         |                            |
| BEECC22008  | <i>Centris</i>        | <i>Centris rhodopus</i>         |                            |
| ASINH125212 | <i>Centris</i>        | <i>Centris similis</i>          |                            |
| ASINH125312 | <i>Centris</i>        | <i>Centris similis</i>          |                            |
| ASINH125412 | <i>Centris</i>        | <i>Centris similis</i>          |                            |
| BEECA94907  | <i>Centris</i>        | <i>Centris tamarugalis</i>      | <i>Centris tamarugales</i> |
| BEECA95007  | <i>Centris</i>        | <i>Centris tamarugalis</i>      | <i>Centris tamarugales</i> |
| GBAH194206  | <i>Centris</i>        | <i>Centris tarsata</i>          |                            |
| LASNA48208  | <i>Centris</i>        | <i>Centris tarsata</i>          |                            |
| LASNA57708  | <i>Centris</i>        | <i>Centris tarsata</i>          |                            |
| ASINH125912 | <i>Centris</i>        | <i>Centris vittata</i>          |                            |
| ASINH126012 | <i>Centris</i>        | <i>Centris vittata</i>          |                            |
| BUSA05205   | <i>Centris</i>        | <i>Centris zacateca</i>         |                            |
| GBAH250007  | <i>Cephalotrigona</i> | <i>Cephalotrigona capitata</i>  |                            |
| ASINH56512  | <i>Cephalotrigona</i> | <i>Cephalotrigona zexmeniae</i> |                            |
| ASINH56812  | <i>Cephalotrigona</i> | <i>Cephalotrigona zexmeniae</i> |                            |
| BBHYA213212 | <i>Ceratina</i>       | <i>Ceratina acantha</i>         |                            |
| BBHYA216112 | <i>Ceratina</i>       | <i>Ceratina acantha</i>         |                            |
| BBHYA217312 | <i>Ceratina</i>       | <i>Ceratina acantha</i>         |                            |
| BBHYA219512 | <i>Ceratina</i>       | <i>Ceratina acantha</i>         |                            |
| BBHYA225112 | <i>Ceratina</i>       | <i>Ceratina acantha</i>         |                            |
| BBHYA277512 | <i>Ceratina</i>       | <i>Ceratina acantha</i>         |                            |
| BBHYA278112 | <i>Ceratina</i>       | <i>Ceratina acantha</i>         |                            |
| BBHYA308412 | <i>Ceratina</i>       | <i>Ceratina acantha</i>         |                            |
| BBHYA329912 | <i>Ceratina</i>       | <i>Ceratina acantha</i>         |                            |
| BEECA04706  | <i>Ceratina</i>       | <i>Ceratina acantha</i>         |                            |
| BEECA04806  | <i>Ceratina</i>       | <i>Ceratina acantha</i>         |                            |
| BEECA13006  | <i>Ceratina</i>       | <i>Ceratina acantha</i>         |                            |
| BEECC18108  | <i>Ceratina</i>       | <i>Ceratina acantha</i>         |                            |
| BEECC18208  | <i>Ceratina</i>       | <i>Ceratina acantha</i>         |                            |
| BEECC18308  | <i>Ceratina</i>       | <i>Ceratina acantha</i>         |                            |
| BEECC18408  | <i>Ceratina</i>       | <i>Ceratina acantha</i>         |                            |
| HVFW20419   | <i>Ceratina</i>       | <i>Ceratina acantha</i>         |                            |
| HVFW30119   | <i>Ceratina</i>       | <i>Ceratina acantha</i>         |                            |
| SDBEE05512  | <i>Ceratina</i>       | <i>Ceratina acantha</i>         |                            |
| SDBEE05612  | <i>Ceratina</i>       | <i>Ceratina acantha</i>         |                            |
| SDBEE05712  | <i>Ceratina</i>       | <i>Ceratina acantha</i>         |                            |
| ABEE09517   | <i>Ceratina</i>       | <i>Ceratina acuta</i>           |                            |
| PIMA11619   | <i>Ceratina</i>       | <i>Ceratina apacheorum</i>      |                            |
| PIMA11719   | <i>Ceratina</i>       | <i>Ceratina apacheorum</i>      |                            |
| PIMA11819   | <i>Ceratina</i>       | <i>Ceratina apacheorum</i>      |                            |
| GBAH1843219 | <i>Ceratina</i>       | <i>Ceratina arizonensis</i>     |                            |
| GBAH1843319 | <i>Ceratina</i>       | <i>Ceratina arizonensis</i>     |                            |
| MSAPB130512 | <i>Ceratina</i>       | <i>Ceratina australensis</i>    |                            |

|              |                 |                              |
|--------------|-----------------|------------------------------|
| MSAPB130612  | <i>Ceratina</i> | <i>Ceratina australensis</i> |
| MSAPB130812  | <i>Ceratina</i> | <i>Ceratina australensis</i> |
| MSAPB130912  | <i>Ceratina</i> | <i>Ceratina australensis</i> |
| GBMNA4618819 | <i>Ceratina</i> | <i>Ceratina binghami</i>     |
| ABBOL03615   | <i>Ceratina</i> | <i>Ceratina boninensis</i>   |
| ABBOL03715   | <i>Ceratina</i> | <i>Ceratina boninensis</i>   |
| DOBEE60515   | <i>Ceratina</i> | <i>Ceratina bowringi</i>     |
| DOBEE61115   | <i>Ceratina</i> | <i>Ceratina bowringi</i>     |
| DOBEE61415   | <i>Ceratina</i> | <i>Ceratina bowringi</i>     |
| DOBEE62215   | <i>Ceratina</i> | <i>Ceratina bowringi</i>     |
| DOBEE63215   | <i>Ceratina</i> | <i>Ceratina bowringi</i>     |
| DOBEE63515   | <i>Ceratina</i> | <i>Ceratina bowringi</i>     |
| DOBEE66315   | <i>Ceratina</i> | <i>Ceratina bowringi</i>     |
| SABEE78915   | <i>Ceratina</i> | <i>Ceratina bowringi</i>     |
| SABEE79715   | <i>Ceratina</i> | <i>Ceratina bowringi</i>     |
| SABEE83215   | <i>Ceratina</i> | <i>Ceratina bowringi</i>     |
| SABEE95815   | <i>Ceratina</i> | <i>Ceratina bowringi</i>     |
| SABEE96015   | <i>Ceratina</i> | <i>Ceratina bowringi</i>     |
| SABEE99915   | <i>Ceratina</i> | <i>Ceratina bowringi</i>     |
| ASGCB24913   | <i>Ceratina</i> | <i>Ceratina calcarata</i>    |
| BEECB98707   | <i>Ceratina</i> | <i>Ceratina calcarata</i>    |
| BEECB98907   | <i>Ceratina</i> | <i>Ceratina calcarata</i>    |
| BEECB99007   | <i>Ceratina</i> | <i>Ceratina calcarata</i>    |
| BEECD05409   | <i>Ceratina</i> | <i>Ceratina calcarata</i>    |
| BEECD11209   | <i>Ceratina</i> | <i>Ceratina calcarata</i>    |
| BEECD11509   | <i>Ceratina</i> | <i>Ceratina calcarata</i>    |
| BEECD11609   | <i>Ceratina</i> | <i>Ceratina calcarata</i>    |
| BEECD11709   | <i>Ceratina</i> | <i>Ceratina calcarata</i>    |
| BEECD11809   | <i>Ceratina</i> | <i>Ceratina calcarata</i>    |
| BEECD11909   | <i>Ceratina</i> | <i>Ceratina calcarata</i>    |
| BEECD12009   | <i>Ceratina</i> | <i>Ceratina calcarata</i>    |
| BEECD12109   | <i>Ceratina</i> | <i>Ceratina calcarata</i>    |
| BEECD12209   | <i>Ceratina</i> | <i>Ceratina calcarata</i>    |
| BEECD12309   | <i>Ceratina</i> | <i>Ceratina calcarata</i>    |
| BEECD12409   | <i>Ceratina</i> | <i>Ceratina calcarata</i>    |
| BEECD12509   | <i>Ceratina</i> | <i>Ceratina calcarata</i>    |
| BEECD12609   | <i>Ceratina</i> | <i>Ceratina calcarata</i>    |
| BEECD12709   | <i>Ceratina</i> | <i>Ceratina calcarata</i>    |
| BEECD12809   | <i>Ceratina</i> | <i>Ceratina calcarata</i>    |
| BEECD13009   | <i>Ceratina</i> | <i>Ceratina calcarata</i>    |
| BEECD13109   | <i>Ceratina</i> | <i>Ceratina calcarata</i>    |
| BEECD13209   | <i>Ceratina</i> | <i>Ceratina calcarata</i>    |
| BEECD13509   | <i>Ceratina</i> | <i>Ceratina calcarata</i>    |
| BEECD13609   | <i>Ceratina</i> | <i>Ceratina calcarata</i>    |
| BEECD13709   | <i>Ceratina</i> | <i>Ceratina calcarata</i>    |
| BEECD14409   | <i>Ceratina</i> | <i>Ceratina calcarata</i>    |

|              |                 |                           |
|--------------|-----------------|---------------------------|
| BEECD14509   | <i>Ceratina</i> | <i>Ceratina calcarata</i> |
| BEECD16509   | <i>Ceratina</i> | <i>Ceratina calcarata</i> |
| BEECD17109   | <i>Ceratina</i> | <i>Ceratina calcarata</i> |
| BEECD17209   | <i>Ceratina</i> | <i>Ceratina calcarata</i> |
| BEEMH16606   | <i>Ceratina</i> | <i>Ceratina calcarata</i> |
| BEEMH20906   | <i>Ceratina</i> | <i>Ceratina calcarata</i> |
| BEEMH23406   | <i>Ceratina</i> | <i>Ceratina calcarata</i> |
| BEO06404     | <i>Ceratina</i> | <i>Ceratina calcarata</i> |
| BEO06504     | <i>Ceratina</i> | <i>Ceratina calcarata</i> |
| BEO07204     | <i>Ceratina</i> | <i>Ceratina calcarata</i> |
| BEO07404     | <i>Ceratina</i> | <i>Ceratina calcarata</i> |
| BUSA11705    | <i>Ceratina</i> | <i>Ceratina calcarata</i> |
| DIAL14606    | <i>Ceratina</i> | <i>Ceratina calcarata</i> |
| DIAL26306    | <i>Ceratina</i> | <i>Ceratina calcarata</i> |
| GBAH1632619  | <i>Ceratina</i> | <i>Ceratina calcarata</i> |
| GBAH1632719  | <i>Ceratina</i> | <i>Ceratina calcarata</i> |
| GBAH1632819  | <i>Ceratina</i> | <i>Ceratina calcarata</i> |
| GBAH1632919  | <i>Ceratina</i> | <i>Ceratina calcarata</i> |
| GBAH1633019  | <i>Ceratina</i> | <i>Ceratina calcarata</i> |
| GBAH1633119  | <i>Ceratina</i> | <i>Ceratina calcarata</i> |
| GBAH1633219  | <i>Ceratina</i> | <i>Ceratina calcarata</i> |
| GBAH1633319  | <i>Ceratina</i> | <i>Ceratina calcarata</i> |
| GBMIN7336517 | <i>Ceratina</i> | <i>Ceratina calcarata</i> |
| GBMIN7336617 | <i>Ceratina</i> | <i>Ceratina calcarata</i> |
| GBMIN7336717 | <i>Ceratina</i> | <i>Ceratina calcarata</i> |
| GBMIN7336817 | <i>Ceratina</i> | <i>Ceratina calcarata</i> |
| GBMIN7336917 | <i>Ceratina</i> | <i>Ceratina calcarata</i> |
| GBMIN7337017 | <i>Ceratina</i> | <i>Ceratina calcarata</i> |
| GBMIN7337117 | <i>Ceratina</i> | <i>Ceratina calcarata</i> |
| GBMIN7337217 | <i>Ceratina</i> | <i>Ceratina calcarata</i> |
| GBMIN7337317 | <i>Ceratina</i> | <i>Ceratina calcarata</i> |
| GBMIN7337417 | <i>Ceratina</i> | <i>Ceratina calcarata</i> |
| GBMIN7337517 | <i>Ceratina</i> | <i>Ceratina calcarata</i> |
| GBMIN7337617 | <i>Ceratina</i> | <i>Ceratina calcarata</i> |
| GBMIN7337717 | <i>Ceratina</i> | <i>Ceratina calcarata</i> |
| GBMIN7337817 | <i>Ceratina</i> | <i>Ceratina calcarata</i> |
| GBMIN7337917 | <i>Ceratina</i> | <i>Ceratina calcarata</i> |
| GBMIN7338017 | <i>Ceratina</i> | <i>Ceratina calcarata</i> |
| GBMIN7338117 | <i>Ceratina</i> | <i>Ceratina calcarata</i> |
| GBMIN7338217 | <i>Ceratina</i> | <i>Ceratina calcarata</i> |
| GBMIN7338317 | <i>Ceratina</i> | <i>Ceratina calcarata</i> |
| GBMIN7338417 | <i>Ceratina</i> | <i>Ceratina calcarata</i> |
| GBMIN7338517 | <i>Ceratina</i> | <i>Ceratina calcarata</i> |
| GBMIN7338617 | <i>Ceratina</i> | <i>Ceratina calcarata</i> |
| GBMIN7338717 | <i>Ceratina</i> | <i>Ceratina calcarata</i> |
| GBMIN7338817 | <i>Ceratina</i> | <i>Ceratina calcarata</i> |

|              |                 |                           |
|--------------|-----------------|---------------------------|
| GBMIN7338917 | <i>Ceratina</i> | <i>Ceratina calcarata</i> |
| GBMIN7339017 | <i>Ceratina</i> | <i>Ceratina calcarata</i> |
| GBMIN7339117 | <i>Ceratina</i> | <i>Ceratina calcarata</i> |
| GBMIN7339217 | <i>Ceratina</i> | <i>Ceratina calcarata</i> |
| GBMIN7339317 | <i>Ceratina</i> | <i>Ceratina calcarata</i> |
| GBMIN7339417 | <i>Ceratina</i> | <i>Ceratina calcarata</i> |
| GBMIN7339517 | <i>Ceratina</i> | <i>Ceratina calcarata</i> |
| GBMIN7339617 | <i>Ceratina</i> | <i>Ceratina calcarata</i> |
| GBMIN7339717 | <i>Ceratina</i> | <i>Ceratina calcarata</i> |
| GBMIN7339817 | <i>Ceratina</i> | <i>Ceratina calcarata</i> |
| GBMIN7339917 | <i>Ceratina</i> | <i>Ceratina calcarata</i> |
| GBMIN7340017 | <i>Ceratina</i> | <i>Ceratina calcarata</i> |
| GBMIN7340117 | <i>Ceratina</i> | <i>Ceratina calcarata</i> |
| GBMIN7340217 | <i>Ceratina</i> | <i>Ceratina calcarata</i> |
| GBMIN7340317 | <i>Ceratina</i> | <i>Ceratina calcarata</i> |
| GBMIN7340417 | <i>Ceratina</i> | <i>Ceratina calcarata</i> |
| GBMIN7340517 | <i>Ceratina</i> | <i>Ceratina calcarata</i> |
| GBMIN7340617 | <i>Ceratina</i> | <i>Ceratina calcarata</i> |
| GBMIN7340717 | <i>Ceratina</i> | <i>Ceratina calcarata</i> |
| GBMIN7340817 | <i>Ceratina</i> | <i>Ceratina calcarata</i> |
| GBMIN7340917 | <i>Ceratina</i> | <i>Ceratina calcarata</i> |
| GBMIN7341017 | <i>Ceratina</i> | <i>Ceratina calcarata</i> |
| GBMNA2181819 | <i>Ceratina</i> | <i>Ceratina calcarata</i> |
| HCBNS22703   | <i>Ceratina</i> | <i>Ceratina calcarata</i> |
| HDBNS20904   | <i>Ceratina</i> | <i>Ceratina calcarata</i> |
| HDBNS21104   | <i>Ceratina</i> | <i>Ceratina calcarata</i> |
| UPOLB15009   | <i>Ceratina</i> | <i>Ceratina calcarata</i> |
| UPOLB17909   | <i>Ceratina</i> | <i>Ceratina calcarata</i> |
| UPOLB53609   | <i>Ceratina</i> | <i>Ceratina calcarata</i> |
| UPOLB54209   | <i>Ceratina</i> | <i>Ceratina calcarata</i> |
| UPOLB57009   | <i>Ceratina</i> | <i>Ceratina calcarata</i> |
| UPOLB57109   | <i>Ceratina</i> | <i>Ceratina calcarata</i> |
| UPOLB57209   | <i>Ceratina</i> | <i>Ceratina calcarata</i> |
| UPOLB57409   | <i>Ceratina</i> | <i>Ceratina calcarata</i> |
| UPOLB75109   | <i>Ceratina</i> | <i>Ceratina calcarata</i> |
| UPOLB76009   | <i>Ceratina</i> | <i>Ceratina calcarata</i> |
| UPOLC03109   | <i>Ceratina</i> | <i>Ceratina calcarata</i> |
| UPOLC04909   | <i>Ceratina</i> | <i>Ceratina calcarata</i> |
| UPOLC06609   | <i>Ceratina</i> | <i>Ceratina calcarata</i> |
| UPOLC06709   | <i>Ceratina</i> | <i>Ceratina calcarata</i> |
| UPOLL81409   | <i>Ceratina</i> | <i>Ceratina calcarata</i> |
| UPOLL86609   | <i>Ceratina</i> | <i>Ceratina calcarata</i> |
| UPOLL94409   | <i>Ceratina</i> | <i>Ceratina calcarata</i> |
| ABEE00717    | <i>Ceratina</i> | <i>Ceratina chalybea</i>  |
| ABEE00817    | <i>Ceratina</i> | <i>Ceratina chalybea</i>  |
| BCHYM43113   | <i>Ceratina</i> | <i>Ceratina chalybea</i>  |

|              |                 |                             |
|--------------|-----------------|-----------------------------|
| BCHYM43213   | <i>Ceratina</i> | <i>Ceratina chalybea</i>    |
| FBAPB46909   | <i>Ceratina</i> | <i>Ceratina chalybea</i>    |
| FBAPB47009   | <i>Ceratina</i> | <i>Ceratina chalybea</i>    |
| FBAPB47109   | <i>Ceratina</i> | <i>Ceratina chalybea</i>    |
| FBAPB47209   | <i>Ceratina</i> | <i>Ceratina chalybea</i>    |
| FBAPC49111   | <i>Ceratina</i> | <i>Ceratina chalybea</i>    |
| FBAPC75811   | <i>Ceratina</i> | <i>Ceratina chalybea</i>    |
| FBAPC75911   | <i>Ceratina</i> | <i>Ceratina chalybea</i>    |
| FBAPD10711   | <i>Ceratina</i> | <i>Ceratina chalybea</i>    |
| FBAPD10811   | <i>Ceratina</i> | <i>Ceratina chalybea</i>    |
| FBAPD10911   | <i>Ceratina</i> | <i>Ceratina chalybea</i>    |
| FBAPD11011   | <i>Ceratina</i> | <i>Ceratina chalybea</i>    |
| FBAPD41511   | <i>Ceratina</i> | <i>Ceratina chalybea</i>    |
| FBAPD41611   | <i>Ceratina</i> | <i>Ceratina chalybea</i>    |
| FBAPD41711   | <i>Ceratina</i> | <i>Ceratina chalybea</i>    |
| FBAPD41811   | <i>Ceratina</i> | <i>Ceratina chalybea</i>    |
| GBAH1843419  | <i>Ceratina</i> | <i>Ceratina chalybea</i>    |
| GBAH1843519  | <i>Ceratina</i> | <i>Ceratina chalybea</i>    |
| GMGMA74514   | <i>Ceratina</i> | <i>Ceratina chalybea</i>    |
| BOWGF16608   | <i>Ceratina</i> | <i>Ceratina chrysomalla</i> |
| BEECC34208   | <i>Ceratina</i> | <i>Ceratina cockerelli</i>  |
| BUSA20805    | <i>Ceratina</i> | <i>Ceratina cockerelli</i>  |
| GBMNA2181619 | <i>Ceratina</i> | <i>Ceratina cockerelli</i>  |
| BOFTH38209   | <i>Ceratina</i> | <i>Ceratina cognata</i>     |
| BOFTH38409   | <i>Ceratina</i> | <i>Ceratina cognata</i>     |
| DOBEE08515   | <i>Ceratina</i> | <i>Ceratina cognata</i>     |
| DOBEE38515   | <i>Ceratina</i> | <i>Ceratina cognata</i>     |
| GBAH1105315  | <i>Ceratina</i> | <i>Ceratina compacta</i>    |
| GBMIN7341117 | <i>Ceratina</i> | <i>Ceratina compacta</i>    |
| GMBCH257215  | <i>Ceratina</i> | <i>Ceratina compacta</i>    |
| DOBEE33615   | <i>Ceratina</i> | <i>Ceratina coptica</i>     |
| DOBEE58215   | <i>Ceratina</i> | <i>Ceratina coptica</i>     |
| DOBEE58515   | <i>Ceratina</i> | <i>Ceratina coptica</i>     |
| DOBEE58915   | <i>Ceratina</i> | <i>Ceratina coptica</i>     |
| DOBEE59015   | <i>Ceratina</i> | <i>Ceratina coptica</i>     |
| DOBEE61215   | <i>Ceratina</i> | <i>Ceratina coptica</i>     |
| DOBEE62415   | <i>Ceratina</i> | <i>Ceratina coptica</i>     |
| DOBEE63015   | <i>Ceratina</i> | <i>Ceratina coptica</i>     |
| DOBEE63115   | <i>Ceratina</i> | <i>Ceratina coptica</i>     |
| DOBEE63315   | <i>Ceratina</i> | <i>Ceratina coptica</i>     |
| DOBEE64615   | <i>Ceratina</i> | <i>Ceratina coptica</i>     |
| DOBEE65015   | <i>Ceratina</i> | <i>Ceratina coptica</i>     |
| DOBEE65415   | <i>Ceratina</i> | <i>Ceratina coptica</i>     |
| DOBEE65615   | <i>Ceratina</i> | <i>Ceratina coptica</i>     |
| DOBEE67915   | <i>Ceratina</i> | <i>Ceratina coptica</i>     |
| SABEE30915   | <i>Ceratina</i> | <i>Ceratina coptica</i>     |

|            |                 |                             |
|------------|-----------------|-----------------------------|
| SABEE36315 | <i>Ceratina</i> | <i>Ceratina coptica</i>     |
| SABEE37115 | <i>Ceratina</i> | <i>Ceratina coptica</i>     |
| SABEE39015 | <i>Ceratina</i> | <i>Ceratina coptica</i>     |
| SABEE39115 | <i>Ceratina</i> | <i>Ceratina coptica</i>     |
| SABEE39815 | <i>Ceratina</i> | <i>Ceratina coptica</i>     |
| SABEE39915 | <i>Ceratina</i> | <i>Ceratina coptica</i>     |
| SABEE40015 | <i>Ceratina</i> | <i>Ceratina coptica</i>     |
| SABEE41315 | <i>Ceratina</i> | <i>Ceratina coptica</i>     |
| SABEE41415 | <i>Ceratina</i> | <i>Ceratina coptica</i>     |
| SABEE41515 | <i>Ceratina</i> | <i>Ceratina coptica</i>     |
| SABEE41615 | <i>Ceratina</i> | <i>Ceratina coptica</i>     |
| SABEE41815 | <i>Ceratina</i> | <i>Ceratina coptica</i>     |
| SABEE47515 | <i>Ceratina</i> | <i>Ceratina coptica</i>     |
| SABEE47715 | <i>Ceratina</i> | <i>Ceratina coptica</i>     |
| SABEE47815 | <i>Ceratina</i> | <i>Ceratina coptica</i>     |
| SABEE47915 | <i>Ceratina</i> | <i>Ceratina coptica</i>     |
| SABEE48115 | <i>Ceratina</i> | <i>Ceratina coptica</i>     |
| SABEE51215 | <i>Ceratina</i> | <i>Ceratina coptica</i>     |
| SABEE51315 | <i>Ceratina</i> | <i>Ceratina coptica</i>     |
| SABEE52015 | <i>Ceratina</i> | <i>Ceratina coptica</i>     |
| SABEE52215 | <i>Ceratina</i> | <i>Ceratina coptica</i>     |
| SABEE54015 | <i>Ceratina</i> | <i>Ceratina coptica</i>     |
| SABEE54115 | <i>Ceratina</i> | <i>Ceratina coptica</i>     |
| SABEE56815 | <i>Ceratina</i> | <i>Ceratina coptica</i>     |
| SABEE56915 | <i>Ceratina</i> | <i>Ceratina coptica</i>     |
| SABEE57015 | <i>Ceratina</i> | <i>Ceratina coptica</i>     |
| SABEE57215 | <i>Ceratina</i> | <i>Ceratina coptica</i>     |
| SABEE65015 | <i>Ceratina</i> | <i>Ceratina coptica</i>     |
| ABEE00917  | <i>Ceratina</i> | <i>Ceratina cucurbitina</i> |
| ABEE01017  | <i>Ceratina</i> | <i>Ceratina cucurbitina</i> |
| ABEE21417  | <i>Ceratina</i> | <i>Ceratina cucurbitina</i> |
| BCHYM42513 | <i>Ceratina</i> | <i>Ceratina cucurbitina</i> |
| BCHYM42613 | <i>Ceratina</i> | <i>Ceratina cucurbitina</i> |
| BCHYM42713 | <i>Ceratina</i> | <i>Ceratina cucurbitina</i> |
| BCHYM42813 | <i>Ceratina</i> | <i>Ceratina cucurbitina</i> |
| FBAPB47409 | <i>Ceratina</i> | <i>Ceratina cucurbitina</i> |
| FBAPB47609 | <i>Ceratina</i> | <i>Ceratina cucurbitina</i> |
| FBAPC48711 | <i>Ceratina</i> | <i>Ceratina cucurbitina</i> |
| FBAPC48811 | <i>Ceratina</i> | <i>Ceratina cucurbitina</i> |
| FBAPC48911 | <i>Ceratina</i> | <i>Ceratina cucurbitina</i> |
| FBAPC49011 | <i>Ceratina</i> | <i>Ceratina cucurbitina</i> |
| FBAPC75311 | <i>Ceratina</i> | <i>Ceratina cucurbitina</i> |
| FBAPC75411 | <i>Ceratina</i> | <i>Ceratina cucurbitina</i> |
| FBAPC75511 | <i>Ceratina</i> | <i>Ceratina cucurbitina</i> |
| FBAPC75611 | <i>Ceratina</i> | <i>Ceratina cucurbitina</i> |
| FBAPD11611 | <i>Ceratina</i> | <i>Ceratina cucurbitina</i> |

|              |                 |                              |
|--------------|-----------------|------------------------------|
| FBAPD11711   | <i>Ceratina</i> | <i>Ceratina cucurbitina</i>  |
| POLLE236219  | <i>Ceratina</i> | <i>Ceratina cucurbitina</i>  |
| ABEE01117    | <i>Ceratina</i> | <i>Ceratina cyanea</i>       |
| ABEE01217    | <i>Ceratina</i> | <i>Ceratina cyanea</i>       |
| BCHYM42913   | <i>Ceratina</i> | <i>Ceratina cyanea</i>       |
| BCHYM43013   | <i>Ceratina</i> | <i>Ceratina cyanea</i>       |
| BEEEE22415   | <i>Ceratina</i> | <i>Ceratina cyanea</i>       |
| FBAPD11111   | <i>Ceratina</i> | <i>Ceratina cyanea</i>       |
| FBAPD11211   | <i>Ceratina</i> | <i>Ceratina cyanea</i>       |
| FBAPD11311   | <i>Ceratina</i> | <i>Ceratina cyanea</i>       |
| FBAPD11411   | <i>Ceratina</i> | <i>Ceratina cyanea</i>       |
| FBHAP17609   | <i>Ceratina</i> | <i>Ceratina cyanea</i>       |
| FBHAP19109   | <i>Ceratina</i> | <i>Ceratina cyanea</i>       |
| FBHAP19209   | <i>Ceratina</i> | <i>Ceratina cyanea</i>       |
| FBHAP19309   | <i>Ceratina</i> | <i>Ceratina cyanea</i>       |
| FBHAP19409   | <i>Ceratina</i> | <i>Ceratina cyanea</i>       |
| GBACU106212  | <i>Ceratina</i> | <i>Ceratina cyanea</i>       |
| GBACU106312  | <i>Ceratina</i> | <i>Ceratina cyanea</i>       |
| GBACU123612  | <i>Ceratina</i> | <i>Ceratina cyanea</i>       |
| GBACU229713  | <i>Ceratina</i> | <i>Ceratina cyanea</i>       |
| GBACU297213  | <i>Ceratina</i> | <i>Ceratina cyanea</i>       |
| GBAH1843619  | <i>Ceratina</i> | <i>Ceratina cyanea</i>       |
| GBMNB6249820 | <i>Ceratina</i> | <i>Ceratina cyanea</i>       |
| GMBUA17614   | <i>Ceratina</i> | <i>Ceratina cyanea</i>       |
| POLLE177519  | <i>Ceratina</i> | <i>Ceratina cyanea</i>       |
| POLLE232419  | <i>Ceratina</i> | <i>Ceratina cyanea</i>       |
| POLLE54319   | <i>Ceratina</i> | <i>Ceratina cyanea</i>       |
| BEECA78207   | <i>Ceratina</i> | <i>Ceratina cyaniventris</i> |
| BOFTH43809   | <i>Ceratina</i> | <i>Ceratina dentipes</i>     |
| DOBEE03015   | <i>Ceratina</i> | <i>Ceratina dentipes</i>     |
| DOBEE65715   | <i>Ceratina</i> | <i>Ceratina dentipes</i>     |
| DOBEE65915   | <i>Ceratina</i> | <i>Ceratina dentipes</i>     |
| DOBEE66215   | <i>Ceratina</i> | <i>Ceratina dentipes</i>     |
| DOBEE66815   | <i>Ceratina</i> | <i>Ceratina dentipes</i>     |
| DOBEE68015   | <i>Ceratina</i> | <i>Ceratina dentipes</i>     |
| DOBEE69215   | <i>Ceratina</i> | <i>Ceratina dentipes</i>     |
| GBAH1668919  | <i>Ceratina</i> | <i>Ceratina dentipes</i>     |
| GBAH1843719  | <i>Ceratina</i> | <i>Ceratina dentipes</i>     |
| GBAH1843819  | <i>Ceratina</i> | <i>Ceratina dentipes</i>     |
| GBAH1843919  | <i>Ceratina</i> | <i>Ceratina dentipes</i>     |
| GBAH1844019  | <i>Ceratina</i> | <i>Ceratina dentipes</i>     |
| GBAH1844119  | <i>Ceratina</i> | <i>Ceratina dentipes</i>     |
| GBAH1844219  | <i>Ceratina</i> | <i>Ceratina dentipes</i>     |
| GBAH1844319  | <i>Ceratina</i> | <i>Ceratina dentipes</i>     |
| GBAH1844419  | <i>Ceratina</i> | <i>Ceratina dentipes</i>     |
| GBAH1844519  | <i>Ceratina</i> | <i>Ceratina dentipes</i>     |



|             |                 |                          |
|-------------|-----------------|--------------------------|
| GBAH1844619 | <i>Ceratina</i> | <i>Ceratina dentipes</i> |
| GBAH1844719 | <i>Ceratina</i> | <i>Ceratina dentipes</i> |
| GBAH1844819 | <i>Ceratina</i> | <i>Ceratina dentipes</i> |
| GBAH1844919 | <i>Ceratina</i> | <i>Ceratina dentipes</i> |
| GBAH1845019 | <i>Ceratina</i> | <i>Ceratina dentipes</i> |
| GBAH1845119 | <i>Ceratina</i> | <i>Ceratina dentipes</i> |
| GBAH1845219 | <i>Ceratina</i> | <i>Ceratina dentipes</i> |
| GBAH1845319 | <i>Ceratina</i> | <i>Ceratina dentipes</i> |
| GBAH1845419 | <i>Ceratina</i> | <i>Ceratina dentipes</i> |
| GBAH1845519 | <i>Ceratina</i> | <i>Ceratina dentipes</i> |
| GBAH1845619 | <i>Ceratina</i> | <i>Ceratina dentipes</i> |
| GBAH1845719 | <i>Ceratina</i> | <i>Ceratina dentipes</i> |
| GBAH1845819 | <i>Ceratina</i> | <i>Ceratina dentipes</i> |
| GBAH1845919 | <i>Ceratina</i> | <i>Ceratina dentipes</i> |
| GBAH1846019 | <i>Ceratina</i> | <i>Ceratina dentipes</i> |
| GBAH1846119 | <i>Ceratina</i> | <i>Ceratina dentipes</i> |
| GBAH1846219 | <i>Ceratina</i> | <i>Ceratina dentipes</i> |
| GBAH1846319 | <i>Ceratina</i> | <i>Ceratina dentipes</i> |
| GBAH1846419 | <i>Ceratina</i> | <i>Ceratina dentipes</i> |
| GBAH1846519 | <i>Ceratina</i> | <i>Ceratina dentipes</i> |
| GBAH1846619 | <i>Ceratina</i> | <i>Ceratina dentipes</i> |
| GBAH1846719 | <i>Ceratina</i> | <i>Ceratina dentipes</i> |
| GBAH1846819 | <i>Ceratina</i> | <i>Ceratina dentipes</i> |
| GBAH1846919 | <i>Ceratina</i> | <i>Ceratina dentipes</i> |
| GBAH1847019 | <i>Ceratina</i> | <i>Ceratina dentipes</i> |
| GBAH1847119 | <i>Ceratina</i> | <i>Ceratina dentipes</i> |
| GBAH1847219 | <i>Ceratina</i> | <i>Ceratina dentipes</i> |
| GBAH1847319 | <i>Ceratina</i> | <i>Ceratina dentipes</i> |
| GBAH1847419 | <i>Ceratina</i> | <i>Ceratina dentipes</i> |
| GBAH1847519 | <i>Ceratina</i> | <i>Ceratina dentipes</i> |
| GBAH1847619 | <i>Ceratina</i> | <i>Ceratina dentipes</i> |
| GBAH1847719 | <i>Ceratina</i> | <i>Ceratina dentipes</i> |
| GBAH1847819 | <i>Ceratina</i> | <i>Ceratina dentipes</i> |
| GBAH1847919 | <i>Ceratina</i> | <i>Ceratina dentipes</i> |
| GBAH1848019 | <i>Ceratina</i> | <i>Ceratina dentipes</i> |
| GBAH1848119 | <i>Ceratina</i> | <i>Ceratina dentipes</i> |
| GBAH1848219 | <i>Ceratina</i> | <i>Ceratina dentipes</i> |
| GBAH1848319 | <i>Ceratina</i> | <i>Ceratina dentipes</i> |
| GBAH1848419 | <i>Ceratina</i> | <i>Ceratina dentipes</i> |
| GBAH1848519 | <i>Ceratina</i> | <i>Ceratina dentipes</i> |
| GBAH1848619 | <i>Ceratina</i> | <i>Ceratina dentipes</i> |
| GBAH1848719 | <i>Ceratina</i> | <i>Ceratina dentipes</i> |
| GBAH1848819 | <i>Ceratina</i> | <i>Ceratina dentipes</i> |
| GBAH1848919 | <i>Ceratina</i> | <i>Ceratina dentipes</i> |
| GBAH1849019 | <i>Ceratina</i> | <i>Ceratina dentipes</i> |
| GBAH1849119 | <i>Ceratina</i> | <i>Ceratina dentipes</i> |

|              |                 |                          |
|--------------|-----------------|--------------------------|
| GBAH1849219  | <i>Ceratina</i> | <i>Ceratina dentipes</i> |
| GBAH1849319  | <i>Ceratina</i> | <i>Ceratina dentipes</i> |
| GBAH1849419  | <i>Ceratina</i> | <i>Ceratina dentipes</i> |
| GBAH1849519  | <i>Ceratina</i> | <i>Ceratina dentipes</i> |
| GBAH1849619  | <i>Ceratina</i> | <i>Ceratina dentipes</i> |
| GBAH1849719  | <i>Ceratina</i> | <i>Ceratina dentipes</i> |
| GBAH1849819  | <i>Ceratina</i> | <i>Ceratina dentipes</i> |
| GBAH1849919  | <i>Ceratina</i> | <i>Ceratina dentipes</i> |
| GBAH1850019  | <i>Ceratina</i> | <i>Ceratina dentipes</i> |
| GBAH1850119  | <i>Ceratina</i> | <i>Ceratina dentipes</i> |
| GBAH1850219  | <i>Ceratina</i> | <i>Ceratina dentipes</i> |
| GBAH1850319  | <i>Ceratina</i> | <i>Ceratina dentipes</i> |
| GBAH1850419  | <i>Ceratina</i> | <i>Ceratina dentipes</i> |
| GBAH1850519  | <i>Ceratina</i> | <i>Ceratina dentipes</i> |
| GBMIN7341217 | <i>Ceratina</i> | <i>Ceratina dentipes</i> |
| GMBCA532715  | <i>Ceratina</i> | <i>Ceratina dentipes</i> |
| MSAPB53911   | <i>Ceratina</i> | <i>Ceratina dentipes</i> |
| SABEE37715   | <i>Ceratina</i> | <i>Ceratina dentipes</i> |
| ASGCB23613   | <i>Ceratina</i> | <i>Ceratina dupla</i>    |
| ASGCB24513   | <i>Ceratina</i> | <i>Ceratina dupla</i>    |
| BEECB100007  | <i>Ceratina</i> | <i>Ceratina dupla</i>    |
| BEECB100107  | <i>Ceratina</i> | <i>Ceratina dupla</i>    |
| BEECB99707   | <i>Ceratina</i> | <i>Ceratina dupla</i>    |
| BEECB99807   | <i>Ceratina</i> | <i>Ceratina dupla</i>    |
| BEECC48208   | <i>Ceratina</i> | <i>Ceratina dupla</i>    |
| BEECD00309   | <i>Ceratina</i> | <i>Ceratina dupla</i>    |
| BEECD03709   | <i>Ceratina</i> | <i>Ceratina dupla</i>    |
| BEECD03809   | <i>Ceratina</i> | <i>Ceratina dupla</i>    |
| BEECD03909   | <i>Ceratina</i> | <i>Ceratina dupla</i>    |
| BEECD05009   | <i>Ceratina</i> | <i>Ceratina dupla</i>    |
| BEECD05109   | <i>Ceratina</i> | <i>Ceratina dupla</i>    |
| BEECD05609   | <i>Ceratina</i> | <i>Ceratina dupla</i>    |
| BEECD05709   | <i>Ceratina</i> | <i>Ceratina dupla</i>    |
| BEECD05809   | <i>Ceratina</i> | <i>Ceratina dupla</i>    |
| BEECD14309   | <i>Ceratina</i> | <i>Ceratina dupla</i>    |
| BEECD16009   | <i>Ceratina</i> | <i>Ceratina dupla</i>    |
| BEECD16109   | <i>Ceratina</i> | <i>Ceratina dupla</i>    |
| BEECD16209   | <i>Ceratina</i> | <i>Ceratina dupla</i>    |
| BEECD16309   | <i>Ceratina</i> | <i>Ceratina dupla</i>    |
| BEECD16409   | <i>Ceratina</i> | <i>Ceratina dupla</i>    |
| BEECD16709   | <i>Ceratina</i> | <i>Ceratina dupla</i>    |
| BEECD16809   | <i>Ceratina</i> | <i>Ceratina dupla</i>    |
| BEECD16909   | <i>Ceratina</i> | <i>Ceratina dupla</i>    |
| BEECD17009   | <i>Ceratina</i> | <i>Ceratina dupla</i>    |
| BEECD17409   | <i>Ceratina</i> | <i>Ceratina dupla</i>    |
| BEECD17509   | <i>Ceratina</i> | <i>Ceratina dupla</i>    |

|              |                 |                       |
|--------------|-----------------|-----------------------|
| BEECD17609   | <i>Ceratina</i> | <i>Ceratina dupla</i> |
| BEECD17709   | <i>Ceratina</i> | <i>Ceratina dupla</i> |
| BEECD17809   | <i>Ceratina</i> | <i>Ceratina dupla</i> |
| BEECD17909   | <i>Ceratina</i> | <i>Ceratina dupla</i> |
| BEECD18009   | <i>Ceratina</i> | <i>Ceratina dupla</i> |
| BEECD18109   | <i>Ceratina</i> | <i>Ceratina dupla</i> |
| BEECD18209   | <i>Ceratina</i> | <i>Ceratina dupla</i> |
| BEECD18309   | <i>Ceratina</i> | <i>Ceratina dupla</i> |
| BUSA11805    | <i>Ceratina</i> | <i>Ceratina dupla</i> |
| GBAH1634319  | <i>Ceratina</i> | <i>Ceratina dupla</i> |
| GBAH1634419  | <i>Ceratina</i> | <i>Ceratina dupla</i> |
| GBAH1634519  | <i>Ceratina</i> | <i>Ceratina dupla</i> |
| GBAH1634619  | <i>Ceratina</i> | <i>Ceratina dupla</i> |
| GBAH1634719  | <i>Ceratina</i> | <i>Ceratina dupla</i> |
| GBAH1634819  | <i>Ceratina</i> | <i>Ceratina dupla</i> |
| GBAH1634919  | <i>Ceratina</i> | <i>Ceratina dupla</i> |
| GBAH1635019  | <i>Ceratina</i> | <i>Ceratina dupla</i> |
| GBAH1635119  | <i>Ceratina</i> | <i>Ceratina dupla</i> |
| GBAH1635219  | <i>Ceratina</i> | <i>Ceratina dupla</i> |
| GBAH1635319  | <i>Ceratina</i> | <i>Ceratina dupla</i> |
| GBAH1635419  | <i>Ceratina</i> | <i>Ceratina dupla</i> |
| GBMIN7341317 | <i>Ceratina</i> | <i>Ceratina dupla</i> |
| GBMIN7341417 | <i>Ceratina</i> | <i>Ceratina dupla</i> |
| GBMIN7341517 | <i>Ceratina</i> | <i>Ceratina dupla</i> |
| GBMIN7341617 | <i>Ceratina</i> | <i>Ceratina dupla</i> |
| GBMIN7341717 | <i>Ceratina</i> | <i>Ceratina dupla</i> |
| GBMIN7341817 | <i>Ceratina</i> | <i>Ceratina dupla</i> |
| GBMIN7341917 | <i>Ceratina</i> | <i>Ceratina dupla</i> |
| GBMIN7342017 | <i>Ceratina</i> | <i>Ceratina dupla</i> |
| GBMIN7342117 | <i>Ceratina</i> | <i>Ceratina dupla</i> |
| GBMIN7342217 | <i>Ceratina</i> | <i>Ceratina dupla</i> |
| GBMIN7342317 | <i>Ceratina</i> | <i>Ceratina dupla</i> |
| GBMIN7342417 | <i>Ceratina</i> | <i>Ceratina dupla</i> |
| GBMIN7342517 | <i>Ceratina</i> | <i>Ceratina dupla</i> |
| GBMIN7342617 | <i>Ceratina</i> | <i>Ceratina dupla</i> |
| GBMIN7342717 | <i>Ceratina</i> | <i>Ceratina dupla</i> |
| GBMIN7342817 | <i>Ceratina</i> | <i>Ceratina dupla</i> |
| GBMIN7342917 | <i>Ceratina</i> | <i>Ceratina dupla</i> |
| GBMIN7343017 | <i>Ceratina</i> | <i>Ceratina dupla</i> |
| GBMIN7343117 | <i>Ceratina</i> | <i>Ceratina dupla</i> |
| GBMIN7343217 | <i>Ceratina</i> | <i>Ceratina dupla</i> |
| GBMIN7343317 | <i>Ceratina</i> | <i>Ceratina dupla</i> |
| GBMIN7343417 | <i>Ceratina</i> | <i>Ceratina dupla</i> |
| GBMIN7343517 | <i>Ceratina</i> | <i>Ceratina dupla</i> |
| GBMIN7343617 | <i>Ceratina</i> | <i>Ceratina dupla</i> |
| GBMIN7343717 | <i>Ceratina</i> | <i>Ceratina dupla</i> |

|              |                 |                           |
|--------------|-----------------|---------------------------|
| GBMIN7343817 | <i>Ceratina</i> | <i>Ceratina dupla</i>     |
| GBMIN7343917 | <i>Ceratina</i> | <i>Ceratina dupla</i>     |
| HDBNS21004   | <i>Ceratina</i> | <i>Ceratina dupla</i>     |
| HDBNS21404   | <i>Ceratina</i> | <i>Ceratina dupla</i>     |
| UPOLB01009   | <i>Ceratina</i> | <i>Ceratina dupla</i>     |
| UPOLB05009   | <i>Ceratina</i> | <i>Ceratina dupla</i>     |
| UPOLB12209   | <i>Ceratina</i> | <i>Ceratina dupla</i>     |
| UPOLB13009   | <i>Ceratina</i> | <i>Ceratina dupla</i>     |
| UPOLB14409   | <i>Ceratina</i> | <i>Ceratina dupla</i>     |
| UPOLB18009   | <i>Ceratina</i> | <i>Ceratina dupla</i>     |
| UPOLB43509   | <i>Ceratina</i> | <i>Ceratina dupla</i>     |
| UPOLB43809   | <i>Ceratina</i> | <i>Ceratina dupla</i>     |
| UPOLB49409   | <i>Ceratina</i> | <i>Ceratina dupla</i>     |
| UPOLB51209   | <i>Ceratina</i> | <i>Ceratina dupla</i>     |
| UPOLB57309   | <i>Ceratina</i> | <i>Ceratina dupla</i>     |
| UPOLB58009   | <i>Ceratina</i> | <i>Ceratina dupla</i>     |
| UPOLB59409   | <i>Ceratina</i> | <i>Ceratina dupla</i>     |
| UPOLB62409   | <i>Ceratina</i> | <i>Ceratina dupla</i>     |
| UPOLB62509   | <i>Ceratina</i> | <i>Ceratina dupla</i>     |
| UPOLB62609   | <i>Ceratina</i> | <i>Ceratina dupla</i>     |
| UPOLB62709   | <i>Ceratina</i> | <i>Ceratina dupla</i>     |
| UPOLB63609   | <i>Ceratina</i> | <i>Ceratina dupla</i>     |
| UPOLB63809   | <i>Ceratina</i> | <i>Ceratina dupla</i>     |
| UPOLB66509   | <i>Ceratina</i> | <i>Ceratina dupla</i>     |
| UPOLB74809   | <i>Ceratina</i> | <i>Ceratina dupla</i>     |
| UPOLB76309   | <i>Ceratina</i> | <i>Ceratina dupla</i>     |
| UPOLB76409   | <i>Ceratina</i> | <i>Ceratina dupla</i>     |
| UPOLB76509   | <i>Ceratina</i> | <i>Ceratina dupla</i>     |
| UPOLB76609   | <i>Ceratina</i> | <i>Ceratina dupla</i>     |
| UPOLC01609   | <i>Ceratina</i> | <i>Ceratina dupla</i>     |
| UPOLC03809   | <i>Ceratina</i> | <i>Ceratina dupla</i>     |
| UPOLC05309   | <i>Ceratina</i> | <i>Ceratina dupla</i>     |
| UPOLC05909   | <i>Ceratina</i> | <i>Ceratina dupla</i>     |
| UPOLC06009   | <i>Ceratina</i> | <i>Ceratina dupla</i>     |
| UPOLC06209   | <i>Ceratina</i> | <i>Ceratina dupla</i>     |
| UPOLL50709   | <i>Ceratina</i> | <i>Ceratina dupla</i>     |
| UPOLL79909   | <i>Ceratina</i> | <i>Ceratina dupla</i>     |
| UPOLL80009   | <i>Ceratina</i> | <i>Ceratina dupla</i>     |
| UPOLL89009   | <i>Ceratina</i> | <i>Ceratina dupla</i>     |
| GBAH1492419  | <i>Ceratina</i> | <i>Ceratina flavipes</i>  |
| GMRSQ02115   | <i>Ceratina</i> | <i>Ceratina flavipes</i>  |
| BEECD09609   | <i>Ceratina</i> | <i>Ceratina floridana</i> |
| BEECD09709   | <i>Ceratina</i> | <i>Ceratina floridana</i> |
| BEECD09809   | <i>Ceratina</i> | <i>Ceratina floridana</i> |
| BEECD09909   | <i>Ceratina</i> | <i>Ceratina floridana</i> |
| BEECD10009   | <i>Ceratina</i> | <i>Ceratina floridana</i> |

|              |                 |                               |
|--------------|-----------------|-------------------------------|
| BEECD10109   | <i>Ceratina</i> | <i>Ceratina floridana</i>     |
| BEECD10209   | <i>Ceratina</i> | <i>Ceratina floridana</i>     |
| BEECD10309   | <i>Ceratina</i> | <i>Ceratina floridana</i>     |
| BEECD10409   | <i>Ceratina</i> | <i>Ceratina floridana</i>     |
| BEECD10509   | <i>Ceratina</i> | <i>Ceratina floridana</i>     |
| BEECD10609   | <i>Ceratina</i> | <i>Ceratina floridana</i>     |
| BEECD10709   | <i>Ceratina</i> | <i>Ceratina floridana</i>     |
| BEECD10809   | <i>Ceratina</i> | <i>Ceratina floridana</i>     |
| BEECD10909   | <i>Ceratina</i> | <i>Ceratina floridana</i>     |
| BEECD11009   | <i>Ceratina</i> | <i>Ceratina floridana</i>     |
| BEECD11109   | <i>Ceratina</i> | <i>Ceratina floridana</i>     |
| GBAH1633819  | <i>Ceratina</i> | <i>Ceratina floridana</i>     |
| GBMIN7344017 | <i>Ceratina</i> | <i>Ceratina floridana</i>     |
| GBMIN7344117 | <i>Ceratina</i> | <i>Ceratina floridana</i>     |
| GBMIN7344217 | <i>Ceratina</i> | <i>Ceratina floridana</i>     |
| GBMIN7344317 | <i>Ceratina</i> | <i>Ceratina floridana</i>     |
| GBMIN7344417 | <i>Ceratina</i> | <i>Ceratina floridana</i>     |
| GBMIN7344517 | <i>Ceratina</i> | <i>Ceratina floridana</i>     |
| GBMIN7344617 | <i>Ceratina</i> | <i>Ceratina floridana</i>     |
| GBMIN7344717 | <i>Ceratina</i> | <i>Ceratina floridana</i>     |
| GBMIN7344817 | <i>Ceratina</i> | <i>Ceratina floridana</i>     |
| GBMIN7344917 | <i>Ceratina</i> | <i>Ceratina floridana</i>     |
| GBMIN7345017 | <i>Ceratina</i> | <i>Ceratina floridana</i>     |
| GBMIN7345117 | <i>Ceratina</i> | <i>Ceratina floridana</i>     |
| GBMIN7345217 | <i>Ceratina</i> | <i>Ceratina floridana</i>     |
| GBMIN7345317 | <i>Ceratina</i> | <i>Ceratina floridana</i>     |
| GBMIN7345417 | <i>Ceratina</i> | <i>Ceratina floridana</i>     |
| GBMIN7345517 | <i>Ceratina</i> | <i>Ceratina floridana</i>     |
| GBMIN7345617 | <i>Ceratina</i> | <i>Ceratina floridana</i>     |
| GBMIN7345717 | <i>Ceratina</i> | <i>Ceratina floridana</i>     |
| MAHYM15610   | <i>Ceratina</i> | <i>Ceratina hieroglyphica</i> |
| MAHYM15710   | <i>Ceratina</i> | <i>Ceratina hieroglyphica</i> |
| MAHYM27910   | <i>Ceratina</i> | <i>Ceratina hieroglyphica</i> |
| MAHYM28110   | <i>Ceratina</i> | <i>Ceratina hieroglyphica</i> |
| MAHYM32610   | <i>Ceratina</i> | <i>Ceratina hieroglyphica</i> |
| MAHYM70411   | <i>Ceratina</i> | <i>Ceratina hieroglyphica</i> |
| GBAH188906   | <i>Ceratina</i> | <i>Ceratina japonica</i>      |
| BOFTH38109   | <i>Ceratina</i> | <i>Ceratina lieftincki</i>    |
| ABBOL03815   | <i>Ceratina</i> | <i>Ceratina megastigmata</i>  |
| ABBOL03915   | <i>Ceratina</i> | <i>Ceratina megastigmata</i>  |
| ASGCB24413   | <i>Ceratina</i> | <i>Ceratina mikmaqi</i>       |
| ASGCB24613   | <i>Ceratina</i> | <i>Ceratina mikmaqi</i>       |
| BEECC47308   | <i>Ceratina</i> | <i>Ceratina mikmaqi</i>       |
| BEECC47408   | <i>Ceratina</i> | <i>Ceratina mikmaqi</i>       |
| BEECC47508   | <i>Ceratina</i> | <i>Ceratina mikmaqi</i>       |
| BEECC47608   | <i>Ceratina</i> | <i>Ceratina mikmaqi</i>       |

|            |                 |                         |
|------------|-----------------|-------------------------|
| BEECC47708 | <i>Ceratina</i> | <i>Ceratina mikmaqi</i> |
| BEECC47808 | <i>Ceratina</i> | <i>Ceratina mikmaqi</i> |
| BEECC47908 | <i>Ceratina</i> | <i>Ceratina mikmaqi</i> |
| BEECC48008 | <i>Ceratina</i> | <i>Ceratina mikmaqi</i> |
| BEECC48108 | <i>Ceratina</i> | <i>Ceratina mikmaqi</i> |
| BEECC48308 | <i>Ceratina</i> | <i>Ceratina mikmaqi</i> |
| BEECD00109 | <i>Ceratina</i> | <i>Ceratina mikmaqi</i> |
| BEECD00209 | <i>Ceratina</i> | <i>Ceratina mikmaqi</i> |
| BEECD00409 | <i>Ceratina</i> | <i>Ceratina mikmaqi</i> |
| BEECD00509 | <i>Ceratina</i> | <i>Ceratina mikmaqi</i> |
| BEECD00609 | <i>Ceratina</i> | <i>Ceratina mikmaqi</i> |
| BEECD00709 | <i>Ceratina</i> | <i>Ceratina mikmaqi</i> |
| BEECD00809 | <i>Ceratina</i> | <i>Ceratina mikmaqi</i> |
| BEECD00909 | <i>Ceratina</i> | <i>Ceratina mikmaqi</i> |
| BEECD01009 | <i>Ceratina</i> | <i>Ceratina mikmaqi</i> |
| BEECD01109 | <i>Ceratina</i> | <i>Ceratina mikmaqi</i> |
| BEECD01309 | <i>Ceratina</i> | <i>Ceratina mikmaqi</i> |
| BEECD01409 | <i>Ceratina</i> | <i>Ceratina mikmaqi</i> |
| BEECD01509 | <i>Ceratina</i> | <i>Ceratina mikmaqi</i> |
| BEECD01609 | <i>Ceratina</i> | <i>Ceratina mikmaqi</i> |
| BEECD01709 | <i>Ceratina</i> | <i>Ceratina mikmaqi</i> |
| BEECD01809 | <i>Ceratina</i> | <i>Ceratina mikmaqi</i> |
| BEECD01909 | <i>Ceratina</i> | <i>Ceratina mikmaqi</i> |
| BEECD02009 | <i>Ceratina</i> | <i>Ceratina mikmaqi</i> |
| BEECD02109 | <i>Ceratina</i> | <i>Ceratina mikmaqi</i> |
| BEECD02209 | <i>Ceratina</i> | <i>Ceratina mikmaqi</i> |
| BEECD02309 | <i>Ceratina</i> | <i>Ceratina mikmaqi</i> |
| BEECD02409 | <i>Ceratina</i> | <i>Ceratina mikmaqi</i> |
| BEECD02509 | <i>Ceratina</i> | <i>Ceratina mikmaqi</i> |
| BEECD02609 | <i>Ceratina</i> | <i>Ceratina mikmaqi</i> |
| BEECD02709 | <i>Ceratina</i> | <i>Ceratina mikmaqi</i> |
| BEECD02809 | <i>Ceratina</i> | <i>Ceratina mikmaqi</i> |
| BEECD02909 | <i>Ceratina</i> | <i>Ceratina mikmaqi</i> |
| BEECD03009 | <i>Ceratina</i> | <i>Ceratina mikmaqi</i> |
| BEECD03109 | <i>Ceratina</i> | <i>Ceratina mikmaqi</i> |
| BEECD03209 | <i>Ceratina</i> | <i>Ceratina mikmaqi</i> |
| BEECD03309 | <i>Ceratina</i> | <i>Ceratina mikmaqi</i> |
| BEECD03409 | <i>Ceratina</i> | <i>Ceratina mikmaqi</i> |
| BEECD03509 | <i>Ceratina</i> | <i>Ceratina mikmaqi</i> |
| BEECD03609 | <i>Ceratina</i> | <i>Ceratina mikmaqi</i> |
| BEECD04009 | <i>Ceratina</i> | <i>Ceratina mikmaqi</i> |
| BEECD04109 | <i>Ceratina</i> | <i>Ceratina mikmaqi</i> |
| BEECD04209 | <i>Ceratina</i> | <i>Ceratina mikmaqi</i> |
| BEECD04309 | <i>Ceratina</i> | <i>Ceratina mikmaqi</i> |
| BEECD04409 | <i>Ceratina</i> | <i>Ceratina mikmaqi</i> |
| BEECD04509 | <i>Ceratina</i> | <i>Ceratina mikmaqi</i> |

|            |                 |                         |
|------------|-----------------|-------------------------|
| BEECD04609 | <i>Ceratina</i> | <i>Ceratina mikmaqi</i> |
| BEECD04709 | <i>Ceratina</i> | <i>Ceratina mikmaqi</i> |
| BEECD04809 | <i>Ceratina</i> | <i>Ceratina mikmaqi</i> |
| BEECD04909 | <i>Ceratina</i> | <i>Ceratina mikmaqi</i> |
| BEECD05209 | <i>Ceratina</i> | <i>Ceratina mikmaqi</i> |
| BEECD05309 | <i>Ceratina</i> | <i>Ceratina mikmaqi</i> |
| BEECD05509 | <i>Ceratina</i> | <i>Ceratina mikmaqi</i> |
| BEECD05909 | <i>Ceratina</i> | <i>Ceratina mikmaqi</i> |
| BEECD06009 | <i>Ceratina</i> | <i>Ceratina mikmaqi</i> |
| BEECD06109 | <i>Ceratina</i> | <i>Ceratina mikmaqi</i> |
| BEECD06209 | <i>Ceratina</i> | <i>Ceratina mikmaqi</i> |
| BEECD06309 | <i>Ceratina</i> | <i>Ceratina mikmaqi</i> |
| BEECD06409 | <i>Ceratina</i> | <i>Ceratina mikmaqi</i> |
| BEECD06509 | <i>Ceratina</i> | <i>Ceratina mikmaqi</i> |
| BEECD06609 | <i>Ceratina</i> | <i>Ceratina mikmaqi</i> |
| BEECD06709 | <i>Ceratina</i> | <i>Ceratina mikmaqi</i> |
| BEECD06809 | <i>Ceratina</i> | <i>Ceratina mikmaqi</i> |
| BEECD06909 | <i>Ceratina</i> | <i>Ceratina mikmaqi</i> |
| BEECD07009 | <i>Ceratina</i> | <i>Ceratina mikmaqi</i> |
| BEECD07109 | <i>Ceratina</i> | <i>Ceratina mikmaqi</i> |
| BEECD07209 | <i>Ceratina</i> | <i>Ceratina mikmaqi</i> |
| BEECD07309 | <i>Ceratina</i> | <i>Ceratina mikmaqi</i> |
| BEECD07409 | <i>Ceratina</i> | <i>Ceratina mikmaqi</i> |
| BEECD07509 | <i>Ceratina</i> | <i>Ceratina mikmaqi</i> |
| BEECD07609 | <i>Ceratina</i> | <i>Ceratina mikmaqi</i> |
| BEECD07709 | <i>Ceratina</i> | <i>Ceratina mikmaqi</i> |
| BEECD07809 | <i>Ceratina</i> | <i>Ceratina mikmaqi</i> |
| BEECD07909 | <i>Ceratina</i> | <i>Ceratina mikmaqi</i> |
| BEECD08009 | <i>Ceratina</i> | <i>Ceratina mikmaqi</i> |
| BEECD08109 | <i>Ceratina</i> | <i>Ceratina mikmaqi</i> |
| BEECD08209 | <i>Ceratina</i> | <i>Ceratina mikmaqi</i> |
| BEECD08309 | <i>Ceratina</i> | <i>Ceratina mikmaqi</i> |
| BEECD08409 | <i>Ceratina</i> | <i>Ceratina mikmaqi</i> |
| BEECD08509 | <i>Ceratina</i> | <i>Ceratina mikmaqi</i> |
| BEECD08609 | <i>Ceratina</i> | <i>Ceratina mikmaqi</i> |
| BEECD08709 | <i>Ceratina</i> | <i>Ceratina mikmaqi</i> |
| BEECD08809 | <i>Ceratina</i> | <i>Ceratina mikmaqi</i> |
| BEECD08909 | <i>Ceratina</i> | <i>Ceratina mikmaqi</i> |
| BEECD09009 | <i>Ceratina</i> | <i>Ceratina mikmaqi</i> |
| BEECD09109 | <i>Ceratina</i> | <i>Ceratina mikmaqi</i> |
| BEECD09209 | <i>Ceratina</i> | <i>Ceratina mikmaqi</i> |
| BEECD09309 | <i>Ceratina</i> | <i>Ceratina mikmaqi</i> |
| BEECD09409 | <i>Ceratina</i> | <i>Ceratina mikmaqi</i> |
| BEECD09509 | <i>Ceratina</i> | <i>Ceratina mikmaqi</i> |
| BEECD11309 | <i>Ceratina</i> | <i>Ceratina mikmaqi</i> |
| BEECD13409 | <i>Ceratina</i> | <i>Ceratina mikmaqi</i> |

|             |                 |                              |
|-------------|-----------------|------------------------------|
| BEECD13909  | <i>Ceratina</i> | <i>Ceratina mikmaqi</i>      |
| BEECD14009  | <i>Ceratina</i> | <i>Ceratina mikmaqi</i>      |
| BEECD14109  | <i>Ceratina</i> | <i>Ceratina mikmaqi</i>      |
| BEECD14209  | <i>Ceratina</i> | <i>Ceratina mikmaqi</i>      |
| BEECD14609  | <i>Ceratina</i> | <i>Ceratina mikmaqi</i>      |
| BEECD16609  | <i>Ceratina</i> | <i>Ceratina mikmaqi</i>      |
| DIAL27206   | <i>Ceratina</i> | <i>Ceratina mikmaqi</i>      |
| UPOLB07109  | <i>Ceratina</i> | <i>Ceratina mikmaqi</i>      |
| UPOLB12909  | <i>Ceratina</i> | <i>Ceratina mikmaqi</i>      |
| UPOLB14509  | <i>Ceratina</i> | <i>Ceratina mikmaqi</i>      |
| UPOLB25709  | <i>Ceratina</i> | <i>Ceratina mikmaqi</i>      |
| UPOLB56309  | <i>Ceratina</i> | <i>Ceratina mikmaqi</i>      |
| UPOLB58809  | <i>Ceratina</i> | <i>Ceratina mikmaqi</i>      |
| UPOLB63509  | <i>Ceratina</i> | <i>Ceratina mikmaqi</i>      |
| UPOLB64409  | <i>Ceratina</i> | <i>Ceratina mikmaqi</i>      |
| UPOLB65309  | <i>Ceratina</i> | <i>Ceratina mikmaqi</i>      |
| UPOLB65409  | <i>Ceratina</i> | <i>Ceratina mikmaqi</i>      |
| UPOLB74509  | <i>Ceratina</i> | <i>Ceratina mikmaqi</i>      |
| UPOLB80509  | <i>Ceratina</i> | <i>Ceratina mikmaqi</i>      |
| UPOLB80609  | <i>Ceratina</i> | <i>Ceratina mikmaqi</i>      |
| UPOLB86109  | <i>Ceratina</i> | <i>Ceratina mikmaqi</i>      |
| UPOLC04309  | <i>Ceratina</i> | <i>Ceratina mikmaqi</i>      |
| UPOLC04609  | <i>Ceratina</i> | <i>Ceratina mikmaqi</i>      |
| UPOLL33509  | <i>Ceratina</i> | <i>Ceratina mikmaqi</i>      |
| UPOLL56709  | <i>Ceratina</i> | <i>Ceratina mikmaqi</i>      |
| UPOLL62609  | <i>Ceratina</i> | <i>Ceratina mikmaqi</i>      |
| UPOLL68909  | <i>Ceratina</i> | <i>Ceratina mikmaqi</i>      |
| UPOLL94209  | <i>Ceratina</i> | <i>Ceratina mikmaqi</i>      |
| UPOLL94309  | <i>Ceratina</i> | <i>Ceratina mikmaqi</i>      |
| GBAH188806  | <i>Ceratina</i> | <i>Ceratina minutula</i>     |
| BEECC17808  | <i>Ceratina</i> | <i>Ceratina nanula</i>       |
| BEECC17908  | <i>Ceratina</i> | <i>Ceratina nanula</i>       |
| GBMIN777812 | <i>Ceratina</i> | <i>Ceratina nanula</i>       |
| SDBEE06012  | <i>Ceratina</i> | <i>Ceratina nanula</i>       |
| SDBEE06112  | <i>Ceratina</i> | <i>Ceratina nanula</i>       |
| BBHYG08210  | <i>Ceratina</i> | <i>Ceratina neomexicana</i>  |
| BBHYG08710  | <i>Ceratina</i> | <i>Ceratina neomexicana</i>  |
| BBHYG09010  | <i>Ceratina</i> | <i>Ceratina neomexicana</i>  |
| BBHYG61710  | <i>Ceratina</i> | <i>Ceratina neomexicana</i>  |
| BEECC91709  | <i>Ceratina</i> | <i>Ceratina neomexicana</i>  |
| BEECC91809  | <i>Ceratina</i> | <i>Ceratina neomexicana</i>  |
| BEECC91909  | <i>Ceratina</i> | <i>Ceratina neomexicana</i>  |
| BEECC92009  | <i>Ceratina</i> | <i>Ceratina neomexicana</i>  |
| BCHYM43313  | <i>Ceratina</i> | <i>Ceratina nigrolabiata</i> |
| GBACU351913 | <i>Ceratina</i> | <i>Ceratina nigrolabiata</i> |
| GBACU352013 | <i>Ceratina</i> | <i>Ceratina nigrolabiata</i> |



|             |                 |                            |
|-------------|-----------------|----------------------------|
| ABBOL03315  | <i>Ceratina</i> | <i>Ceratina okinawana</i>  |
| ABBOL03415  | <i>Ceratina</i> | <i>Ceratina okinawana</i>  |
| ABBOL03515  | <i>Ceratina</i> | <i>Ceratina okinawana</i>  |
| BEECB100307 | <i>Ceratina</i> | <i>Ceratina pacifica</i>   |
| BEECB100407 | <i>Ceratina</i> | <i>Ceratina pacifica</i>   |
| BEECB49007  | <i>Ceratina</i> | <i>Ceratina pacifica</i>   |
| BEECC25208  | <i>Ceratina</i> | <i>Ceratina pacifica</i>   |
| BEECA78107  | <i>Ceratina</i> | <i>Ceratina polita</i>     |
| SDBEE06212  | <i>Ceratina</i> | <i>Ceratina punctigena</i> |
| BEECC91309  | <i>Ceratina</i> | <i>Ceratina sequoiae</i>   |
| BEECC91409  | <i>Ceratina</i> | <i>Ceratina sequoiae</i>   |
| BEECC91509  | <i>Ceratina</i> | <i>Ceratina sequoiae</i>   |
| BEECC91609  | <i>Ceratina</i> | <i>Ceratina sequoiae</i>   |
| ABBOL03215  | <i>Ceratina</i> | <i>Ceratina silvicola</i>  |
| DOBEE00715  | <i>Ceratina</i> | <i>Ceratina smaragdula</i> |
| DOBEE01015  | <i>Ceratina</i> | <i>Ceratina smaragdula</i> |
| DOBEE01415  | <i>Ceratina</i> | <i>Ceratina smaragdula</i> |
| DOBEE01515  | <i>Ceratina</i> | <i>Ceratina smaragdula</i> |
| DOBEE01615  | <i>Ceratina</i> | <i>Ceratina smaragdula</i> |
| DOBEE01715  | <i>Ceratina</i> | <i>Ceratina smaragdula</i> |
| DOBEE02115  | <i>Ceratina</i> | <i>Ceratina smaragdula</i> |
| DOBEE02215  | <i>Ceratina</i> | <i>Ceratina smaragdula</i> |
| DOBEE02315  | <i>Ceratina</i> | <i>Ceratina smaragdula</i> |
| DOBEE02415  | <i>Ceratina</i> | <i>Ceratina smaragdula</i> |
| DOBEE02515  | <i>Ceratina</i> | <i>Ceratina smaragdula</i> |
| DOBEE02615  | <i>Ceratina</i> | <i>Ceratina smaragdula</i> |
| DOBEE02715  | <i>Ceratina</i> | <i>Ceratina smaragdula</i> |
| DOBEE02815  | <i>Ceratina</i> | <i>Ceratina smaragdula</i> |
| DOBEE02915  | <i>Ceratina</i> | <i>Ceratina smaragdula</i> |
| DOBEE03915  | <i>Ceratina</i> | <i>Ceratina smaragdula</i> |
| DOBEE04015  | <i>Ceratina</i> | <i>Ceratina smaragdula</i> |
| DOBEE04215  | <i>Ceratina</i> | <i>Ceratina smaragdula</i> |
| DOBEE04315  | <i>Ceratina</i> | <i>Ceratina smaragdula</i> |
| DOBEE37815  | <i>Ceratina</i> | <i>Ceratina smaragdula</i> |
| DOBEE61015  | <i>Ceratina</i> | <i>Ceratina smaragdula</i> |
| DOBEE61515  | <i>Ceratina</i> | <i>Ceratina smaragdula</i> |
| DOBEE61715  | <i>Ceratina</i> | <i>Ceratina smaragdula</i> |
| DOBEE61815  | <i>Ceratina</i> | <i>Ceratina smaragdula</i> |
| DOBEE61915  | <i>Ceratina</i> | <i>Ceratina smaragdula</i> |
| DOBEE62015  | <i>Ceratina</i> | <i>Ceratina smaragdula</i> |
| DOBEE62115  | <i>Ceratina</i> | <i>Ceratina smaragdula</i> |
| GBAH1645019 | <i>Ceratina</i> | <i>Ceratina smaragdula</i> |
| GBAH1645119 | <i>Ceratina</i> | <i>Ceratina smaragdula</i> |
| GBAH1645219 | <i>Ceratina</i> | <i>Ceratina smaragdula</i> |
| GBAH1645319 | <i>Ceratina</i> | <i>Ceratina smaragdula</i> |
| GBAH1645419 | <i>Ceratina</i> | <i>Ceratina smaragdula</i> |

|              |                 |                            |
|--------------|-----------------|----------------------------|
| GBAH1645519  | <i>Ceratina</i> | <i>Ceratina smaragdula</i> |
| GBAH1645619  | <i>Ceratina</i> | <i>Ceratina smaragdula</i> |
| GBAH1645719  | <i>Ceratina</i> | <i>Ceratina smaragdula</i> |
| GBAH1645819  | <i>Ceratina</i> | <i>Ceratina smaragdula</i> |
| GBAH1645919  | <i>Ceratina</i> | <i>Ceratina smaragdula</i> |
| GBAH1646019  | <i>Ceratina</i> | <i>Ceratina smaragdula</i> |
| GBAH1646119  | <i>Ceratina</i> | <i>Ceratina smaragdula</i> |
| GBAH1646219  | <i>Ceratina</i> | <i>Ceratina smaragdula</i> |
| GBAH1646319  | <i>Ceratina</i> | <i>Ceratina smaragdula</i> |
| GBAH1646419  | <i>Ceratina</i> | <i>Ceratina smaragdula</i> |
| GBAH1646519  | <i>Ceratina</i> | <i>Ceratina smaragdula</i> |
| GBAH1646619  | <i>Ceratina</i> | <i>Ceratina smaragdula</i> |
| GBAH1646719  | <i>Ceratina</i> | <i>Ceratina smaragdula</i> |
| GBAH1646819  | <i>Ceratina</i> | <i>Ceratina smaragdula</i> |
| GBAH1646919  | <i>Ceratina</i> | <i>Ceratina smaragdula</i> |
| GBAH1647019  | <i>Ceratina</i> | <i>Ceratina smaragdula</i> |
| GBAH1647119  | <i>Ceratina</i> | <i>Ceratina smaragdula</i> |
| GBAH1647219  | <i>Ceratina</i> | <i>Ceratina smaragdula</i> |
| GBAH1647319  | <i>Ceratina</i> | <i>Ceratina smaragdula</i> |
| GBAH1647419  | <i>Ceratina</i> | <i>Ceratina smaragdula</i> |
| GBAH1647519  | <i>Ceratina</i> | <i>Ceratina smaragdula</i> |
| GBAH1647619  | <i>Ceratina</i> | <i>Ceratina smaragdula</i> |
| GBAH1647719  | <i>Ceratina</i> | <i>Ceratina smaragdula</i> |
| GBMIN7345817 | <i>Ceratina</i> | <i>Ceratina smaragdula</i> |
| GBMIN7345917 | <i>Ceratina</i> | <i>Ceratina smaragdula</i> |
| GBMIN7346017 | <i>Ceratina</i> | <i>Ceratina smaragdula</i> |
| GBMIN7346117 | <i>Ceratina</i> | <i>Ceratina smaragdula</i> |
| GBMIN7346217 | <i>Ceratina</i> | <i>Ceratina smaragdula</i> |
| GBMIN7346317 | <i>Ceratina</i> | <i>Ceratina smaragdula</i> |
| GBMIN7346417 | <i>Ceratina</i> | <i>Ceratina smaragdula</i> |
| GBMIN7346517 | <i>Ceratina</i> | <i>Ceratina smaragdula</i> |
| GBMIN7346617 | <i>Ceratina</i> | <i>Ceratina smaragdula</i> |
| GBMIN7346717 | <i>Ceratina</i> | <i>Ceratina smaragdula</i> |
| GBMIN7346817 | <i>Ceratina</i> | <i>Ceratina smaragdula</i> |
| GBMIN7346917 | <i>Ceratina</i> | <i>Ceratina smaragdula</i> |
| GBMIN7347017 | <i>Ceratina</i> | <i>Ceratina smaragdula</i> |
| GBMIN7347117 | <i>Ceratina</i> | <i>Ceratina smaragdula</i> |
| GBMIN7347217 | <i>Ceratina</i> | <i>Ceratina smaragdula</i> |
| GBMIN7347317 | <i>Ceratina</i> | <i>Ceratina smaragdula</i> |
| GBMIN7347417 | <i>Ceratina</i> | <i>Ceratina smaragdula</i> |
| GBMIN7347517 | <i>Ceratina</i> | <i>Ceratina smaragdula</i> |
| GBMIN7347617 | <i>Ceratina</i> | <i>Ceratina smaragdula</i> |
| GBMIN7347717 | <i>Ceratina</i> | <i>Ceratina smaragdula</i> |
| GBMIN7347817 | <i>Ceratina</i> | <i>Ceratina smaragdula</i> |
| GBMIN7347917 | <i>Ceratina</i> | <i>Ceratina smaragdula</i> |
| GBMIN7348017 | <i>Ceratina</i> | <i>Ceratina smaragdula</i> |



|              |                 |                            |
|--------------|-----------------|----------------------------|
| GBMIN7352717 | <i>Ceratina</i> | <i>Ceratina smaragdula</i> |
| GBMIN7352817 | <i>Ceratina</i> | <i>Ceratina smaragdula</i> |
| GBMIN7352917 | <i>Ceratina</i> | <i>Ceratina smaragdula</i> |
| GBMIN7353017 | <i>Ceratina</i> | <i>Ceratina smaragdula</i> |
| GBMIN7353117 | <i>Ceratina</i> | <i>Ceratina smaragdula</i> |
| GBMIN7353217 | <i>Ceratina</i> | <i>Ceratina smaragdula</i> |
| MAHYM36710   | <i>Ceratina</i> | <i>Ceratina smaragdula</i> |
| MAHYM36810   | <i>Ceratina</i> | <i>Ceratina smaragdula</i> |
| MAHYM37010   | <i>Ceratina</i> | <i>Ceratina smaragdula</i> |
| MAHYM37110   | <i>Ceratina</i> | <i>Ceratina smaragdula</i> |
| MAHYM37210   | <i>Ceratina</i> | <i>Ceratina smaragdula</i> |
| MAHYM37310   | <i>Ceratina</i> | <i>Ceratina smaragdula</i> |
| MAHYM40010   | <i>Ceratina</i> | <i>Ceratina smaragdula</i> |
| MAHYM61211   | <i>Ceratina</i> | <i>Ceratina smaragdula</i> |
| MAHYM90512   | <i>Ceratina</i> | <i>Ceratina smaragdula</i> |
| MAIMB11809   | <i>Ceratina</i> | <i>Ceratina smaragdula</i> |
| MAMTS10514   | <i>Ceratina</i> | <i>Ceratina smaragdula</i> |
| MAPOL05110   | <i>Ceratina</i> | <i>Ceratina smaragdula</i> |
| MAPOL05210   | <i>Ceratina</i> | <i>Ceratina smaragdula</i> |
| PMNHC21015   | <i>Ceratina</i> | <i>Ceratina smaragdula</i> |
| SABEE100015  | <i>Ceratina</i> | <i>Ceratina smaragdula</i> |
| SABEE37215   | <i>Ceratina</i> | <i>Ceratina smaragdula</i> |
| SABEE45215   | <i>Ceratina</i> | <i>Ceratina smaragdula</i> |
| SABEE45315   | <i>Ceratina</i> | <i>Ceratina smaragdula</i> |
| SABEE45415   | <i>Ceratina</i> | <i>Ceratina smaragdula</i> |
| SABEE45515   | <i>Ceratina</i> | <i>Ceratina smaragdula</i> |
| SABEE45615   | <i>Ceratina</i> | <i>Ceratina smaragdula</i> |
| SABEE47415   | <i>Ceratina</i> | <i>Ceratina smaragdula</i> |
| SABEE50515   | <i>Ceratina</i> | <i>Ceratina smaragdula</i> |
| SABEE50615   | <i>Ceratina</i> | <i>Ceratina smaragdula</i> |
| SABEE50715   | <i>Ceratina</i> | <i>Ceratina smaragdula</i> |
| SABEE50815   | <i>Ceratina</i> | <i>Ceratina smaragdula</i> |
| SABEE50915   | <i>Ceratina</i> | <i>Ceratina smaragdula</i> |
| SABEE51015   | <i>Ceratina</i> | <i>Ceratina smaragdula</i> |
| SABEE51115   | <i>Ceratina</i> | <i>Ceratina smaragdula</i> |
| SABEE53915   | <i>Ceratina</i> | <i>Ceratina smaragdula</i> |
| SABEE56415   | <i>Ceratina</i> | <i>Ceratina smaragdula</i> |
| SABEE95015   | <i>Ceratina</i> | <i>Ceratina smaragdula</i> |
| SABEE96515   | <i>Ceratina</i> | <i>Ceratina smaragdula</i> |
| SABEE96715   | <i>Ceratina</i> | <i>Ceratina smaragdula</i> |
| SABEE97815   | <i>Ceratina</i> | <i>Ceratina smaragdula</i> |
| SABEE98015   | <i>Ceratina</i> | <i>Ceratina smaragdula</i> |
| SABEE98215   | <i>Ceratina</i> | <i>Ceratina smaragdula</i> |
| SABEE98515   | <i>Ceratina</i> | <i>Ceratina smaragdula</i> |
| SABEE98615   | <i>Ceratina</i> | <i>Ceratina smaragdula</i> |
| SABEE99215   | <i>Ceratina</i> | <i>Ceratina smaragdula</i> |

|              |                 |                            |
|--------------|-----------------|----------------------------|
| SABEE99315   | <i>Ceratina</i> | <i>Ceratina smaragdula</i> |
| SABEE99415   | <i>Ceratina</i> | <i>Ceratina smaragdula</i> |
| SABEE99515   | <i>Ceratina</i> | <i>Ceratina smaragdula</i> |
| SABEE99715   | <i>Ceratina</i> | <i>Ceratina smaragdula</i> |
| SABEE99815   | <i>Ceratina</i> | <i>Ceratina smaragdula</i> |
| ABBOL14515   | <i>Ceratina</i> | <i>Ceratina spinipes</i>   |
| ABBOL14615   | <i>Ceratina</i> | <i>Ceratina spinipes</i>   |
| BEECA28506   | <i>Ceratina</i> | <i>Ceratina strenua</i>    |
| BEECA28606   | <i>Ceratina</i> | <i>Ceratina strenua</i>    |
| BEECD12909   | <i>Ceratina</i> | <i>Ceratina strenua</i>    |
| BEECD13809   | <i>Ceratina</i> | <i>Ceratina strenua</i>    |
| BEECD14709   | <i>Ceratina</i> | <i>Ceratina strenua</i>    |
| GBAH1636319  | <i>Ceratina</i> | <i>Ceratina strenua</i>    |
| GBAH1636419  | <i>Ceratina</i> | <i>Ceratina strenua</i>    |
| GBAH1636519  | <i>Ceratina</i> | <i>Ceratina strenua</i>    |
| GBAH1636619  | <i>Ceratina</i> | <i>Ceratina strenua</i>    |
| GBAH1636719  | <i>Ceratina</i> | <i>Ceratina strenua</i>    |
| GBAH1636819  | <i>Ceratina</i> | <i>Ceratina strenua</i>    |
| GBAH1636919  | <i>Ceratina</i> | <i>Ceratina strenua</i>    |
| GBAH1637019  | <i>Ceratina</i> | <i>Ceratina strenua</i>    |
| GBAH1637119  | <i>Ceratina</i> | <i>Ceratina strenua</i>    |
| GBAH1637219  | <i>Ceratina</i> | <i>Ceratina strenua</i>    |
| GBAH1637319  | <i>Ceratina</i> | <i>Ceratina strenua</i>    |
| GBAH1637419  | <i>Ceratina</i> | <i>Ceratina strenua</i>    |
| GBAH1637519  | <i>Ceratina</i> | <i>Ceratina strenua</i>    |
| GBMIN7353917 | <i>Ceratina</i> | <i>Ceratina strenua</i>    |
| GBMIN7354017 | <i>Ceratina</i> | <i>Ceratina strenua</i>    |
| GBMIN7354117 | <i>Ceratina</i> | <i>Ceratina strenua</i>    |
| GBMIN7354217 | <i>Ceratina</i> | <i>Ceratina strenua</i>    |
| GBMIN7354317 | <i>Ceratina</i> | <i>Ceratina strenua</i>    |
| GBMIN7354417 | <i>Ceratina</i> | <i>Ceratina strenua</i>    |
| GBMIN7354517 | <i>Ceratina</i> | <i>Ceratina strenua</i>    |
| GBMIN7354617 | <i>Ceratina</i> | <i>Ceratina strenua</i>    |
| GBMIN7354717 | <i>Ceratina</i> | <i>Ceratina strenua</i>    |
| GBMIN7354817 | <i>Ceratina</i> | <i>Ceratina strenua</i>    |
| GBMIN7354917 | <i>Ceratina</i> | <i>Ceratina strenua</i>    |
| GBMIN7355017 | <i>Ceratina</i> | <i>Ceratina strenua</i>    |
| GBMIN7355117 | <i>Ceratina</i> | <i>Ceratina strenua</i>    |
| GBMIN7355217 | <i>Ceratina</i> | <i>Ceratina strenua</i>    |
| GBMIN7355317 | <i>Ceratina</i> | <i>Ceratina strenua</i>    |
| GBMIN7355417 | <i>Ceratina</i> | <i>Ceratina strenua</i>    |
| GBMIN7355517 | <i>Ceratina</i> | <i>Ceratina strenua</i>    |
| GBMIN7355617 | <i>Ceratina</i> | <i>Ceratina strenua</i>    |
| GBMIN7355717 | <i>Ceratina</i> | <i>Ceratina strenua</i>    |
| GBMIN7355817 | <i>Ceratina</i> | <i>Ceratina strenua</i>    |
| GBMIN7355917 | <i>Ceratina</i> | <i>Ceratina strenua</i>    |

|              |                     |                                  |
|--------------|---------------------|----------------------------------|
| GBMNA2180719 | <i>Ceratina</i>     | <i>Ceratina strenua</i>          |
| GBAH1105415  | <i>Ceratina</i>     | <i>Ceratina sutepensis</i>       |
| GBAH1643519  | <i>Ceratina</i>     | <i>Ceratina sutepensis</i>       |
| GBMIN7356017 | <i>Ceratina</i>     | <i>Ceratina sutepensis</i>       |
| BEECC18008   | <i>Ceratina</i>     | <i>Ceratina tejonensis</i>       |
| DOBEE63615   | <i>Ceratina</i>     | <i>Ceratina unimaculata</i>      |
| GBMIN7356117 | <i>Ceratina</i>     | <i>Ceratina unimaculata</i>      |
| SABEE55415   | <i>Ceratina</i>     | <i>Ceratina unimaculata</i>      |
| SABEE57115   | <i>Ceratina</i>     | <i>Ceratina unimaculata</i>      |
| SICOB69218   | <i>Chalepogenus</i> | <i>Chalepogenus caeruleus</i>    |
| GBMNB6219220 | <i>Chalepogenus</i> | <i>Chalepogenus cocucci</i>      |
| GBMNA2345119 | <i>Chalepogenus</i> | <i>Chalepogenus goeldianus</i>   |
| GBMNB6217920 | <i>Chalepogenus</i> | <i>Chalepogenus goeldianus</i>   |
| BOFTW26709   | <i>Chalepogenus</i> | <i>Chalepogenus herbsti</i>      |
| GBMNB6218020 | <i>Chalepogenus</i> | <i>Chalepogenus muelleri</i>     |
| GBMNA2345219 | <i>Chalepogenus</i> | <i>Chalepogenus parvus</i>       |
| GBMNB6218920 | <i>Chalepogenus</i> | <i>Chalepogenus parvus</i>       |
| GBMNB6310920 | <i>Chalepogenus</i> | <i>Chalepogenus subcaeruleus</i> |
| GBMNB6212720 | <i>Ctenoplectra</i> | <i>Ctenoplectra albolimbata</i>  |
| GMBCF348615  | <i>Ctenoplectra</i> | <i>Ctenoplectra chalybea</i>     |
| GMBCN31615   | <i>Ctenoplectra</i> | <i>Ctenoplectra chalybea</i>     |
| GBAH1641819  | <i>Ctenoplectra</i> | <i>Ctenoplectra cornuta</i>      |
| GBMIN7873117 | <i>Ctenoplectra</i> | <i>Ctenoplectra davidi</i>       |
| GBMIN7875917 | <i>Ctenoplectra</i> | <i>Ctenoplectra davidi</i>       |
| GBMIN7884917 | <i>Ctenoplectra</i> | <i>Ctenoplectra davidi</i>       |
| GBMIN7896517 | <i>Ctenoplectra</i> | <i>Ctenoplectra davidi</i>       |
| GBMIN7911817 | <i>Ctenoplectra</i> | <i>Ctenoplectra davidi</i>       |
| GMBCC172815  | <i>Ctenoplectra</i> | <i>Ctenoplectra davidi</i>       |
| GBAH1642519  | <i>Ctenoplectra</i> | <i>Ctenoplectra florisomnis</i>  |
| BEECA54106   | <i>Diadasia</i>     | <i>Diadasia australis</i>        |
| BOFWM27108   | <i>Diadasia</i>     | <i>Diadasia australis</i>        |
| HMBME06707   | <i>Diadasia</i>     | <i>Diadasia australis</i>        |
| HMBME06807   | <i>Diadasia</i>     | <i>Diadasia australis</i>        |
| HMBME06907   | <i>Diadasia</i>     | <i>Diadasia australis</i>        |
| HMBME07007   | <i>Diadasia</i>     | <i>Diadasia australis</i>        |
| HMBME07107   | <i>Diadasia</i>     | <i>Diadasia australis</i>        |
| HMBME07207   | <i>Diadasia</i>     | <i>Diadasia australis</i>        |
| HMBME07307   | <i>Diadasia</i>     | <i>Diadasia australis</i>        |
| HMBME07407   | <i>Diadasia</i>     | <i>Diadasia australis</i>        |
| HMBME07807   | <i>Diadasia</i>     | <i>Diadasia australis</i>        |
| HYMBB44409   | <i>Diadasia</i>     | <i>Diadasia australis</i>        |
| SDBEE06312   | <i>Diadasia</i>     | <i>Diadasia australis</i>        |
| SDBEE06412   | <i>Diadasia</i>     | <i>Diadasia australis</i>        |
| TTHYW06208   | <i>Diadasia</i>     | <i>Diadasia australis</i>        |
| BEECC56308   | <i>Diadasia</i>     | <i>Diadasia bituberculata</i>    |
| BEECC56408   | <i>Diadasia</i>     | <i>Diadasia bituberculata</i>    |

|              |                   |                               |                            |
|--------------|-------------------|-------------------------------|----------------------------|
| GBMNB6184320 | <i>Diadasia</i>   | <i>Diadasia bituberculata</i> |                            |
| BBHYA260712  | <i>Diadasia</i>   | <i>Diadasia consociata</i>    |                            |
| BBHYA93812   | <i>Diadasia</i>   | <i>Diadasia consociata</i>    |                            |
| BBHYA93912   | <i>Diadasia</i>   | <i>Diadasia consociata</i>    |                            |
| BBHYA97512   | <i>Diadasia</i>   | <i>Diadasia consociata</i>    |                            |
| BEECB103407  | <i>Diadasia</i>   | <i>Diadasia diminuta</i>      |                            |
| BEECB66607   | <i>Diadasia</i>   | <i>Diadasia diminuta</i>      |                            |
| BEECB57707   | <i>Diadasia</i>   | <i>Diadasia enavata</i>       |                            |
| BBHYG39410   | <i>Diadasia</i>   | <i>Diadasia lutzi</i>         |                            |
| BBHYG69910   | <i>Diadasia</i>   | <i>Diadasia lutzi</i>         |                            |
| BEECC12908   | <i>Diadasia</i>   | <i>Diadasia nigrifrons</i>    |                            |
| BEECB66707   | <i>Diadasia</i>   | <i>Diadasia nitidifrons</i>   |                            |
| BBHYA87612   | <i>Diadasia</i>   | <i>Diadasia ochracea</i>      |                            |
| BBHYA94012   | <i>Diadasia</i>   | <i>Diadasia ochracea</i>      |                            |
| BBHYA95612   | <i>Diadasia</i>   | <i>Diadasia ochracea</i>      |                            |
| BEECC55708   | <i>Diadasia</i>   | <i>Diadasia ochracea</i>      |                            |
| BEECC55808   | <i>Diadasia</i>   | <i>Diadasia ochracea</i>      |                            |
| SDBEE07412   | <i>Diadasia</i>   | <i>Diadasia ochracea</i>      |                            |
| SDBEE07512   | <i>Diadasia</i>   | <i>Diadasia ochracea</i>      |                            |
| BEECB103607  | <i>Diadasia</i>   | <i>Diadasia olivacea</i>      |                            |
| BEECB103707  | <i>Diadasia</i>   | <i>Diadasia olivacea</i>      |                            |
| BEECB103807  | <i>Diadasia</i>   | <i>Diadasia olivacea</i>      |                            |
| BEECC24208   | <i>Diadasia</i>   | <i>Diadasia opuntiae</i>      |                            |
| SDBEE06612   | <i>Diadasia</i>   | <i>Diadasia opuntiae</i>      |                            |
| SDBEE06712   | <i>Diadasia</i>   | <i>Diadasia opuntiae</i>      |                            |
| BBHYA93412   | <i>Diadasia</i>   | <i>Diadasia rinconis</i>      |                            |
| BEECC55908   | <i>Diadasia</i>   | <i>Diadasia rinconis</i>      |                            |
| BEECC56008   | <i>Diadasia</i>   | <i>Diadasia rinconis</i>      |                            |
| BEECC56108   | <i>Diadasia</i>   | <i>Diadasia rinconis</i>      |                            |
| BEECC56208   | <i>Diadasia</i>   | <i>Diadasia rinconis</i>      |                            |
| SDBEE07712   | <i>Diadasia</i>   | <i>Diadasia rinconis</i>      |                            |
| FBAPB52109   | <i>Epeoloides</i> | <i>Epeoloides coecutiens</i>  |                            |
| FBAPB52209   | <i>Epeoloides</i> | <i>Epeoloides coecutiens</i>  |                            |
| FBHAP19809   | <i>Epeoloides</i> | <i>Epeoloides coecutiens</i>  |                            |
| FBHAP40209   | <i>Epeoloides</i> | <i>Epeoloides coecutiens</i>  |                            |
| GBMNB6250620 | <i>Epeoloides</i> | <i>Epeoloides coecutiens</i>  |                            |
| BBHYK68110   | <i>Epeoloides</i> | <i>Epeoloides pilosulus</i>   | <i>Epeoloides pilosula</i> |
| BEECB23207   | <i>Epeoloides</i> | <i>Epeoloides pilosulus</i>   |                            |
| NTCOL33015   | <i>Epeolus</i>    | <i>Epeolus ainsliei</i>       |                            |
| NTCOL49517   | <i>Epeolus</i>    | <i>Epeolus ainsliei</i>       |                            |
| NTCOL49917   | <i>Epeolus</i>    | <i>Epeolus ainsliei</i>       |                            |
| BWONE34009   | <i>Epeolus</i>    | <i>Epeolus alpinus</i>        |                            |
| FBAPC61811   | <i>Epeolus</i>    | <i>Epeolus alpinus</i>        |                            |
| FBAPC61911   | <i>Epeolus</i>    | <i>Epeolus alpinus</i>        |                            |
| BEEAF64815   | <i>Epeolus</i>    | <i>Epeolus americanus</i>     |                            |
| BEECA26206   | <i>Epeolus</i>    | <i>Epeolus americanus</i>     |                            |

|             |                |                              |
|-------------|----------------|------------------------------|
| BEECA26306  | <i>Epeolus</i> | <i>Epeolus americanus</i>    |
| BEECB87907  | <i>Epeolus</i> | <i>Epeolus americanus</i>    |
| BEECB88007  | <i>Epeolus</i> | <i>Epeolus americanus</i>    |
| BOTWC109816 | <i>Epeolus</i> | <i>Epeolus americanus</i>    |
| BOWGF83509  | <i>Epeolus</i> | <i>Epeolus americanus</i>    |
| BOWGF83609  | <i>Epeolus</i> | <i>Epeolus americanus</i>    |
| BOWGF83709  | <i>Epeolus</i> | <i>Epeolus americanus</i>    |
| BOWGF83809  | <i>Epeolus</i> | <i>Epeolus americanus</i>    |
| BOWGF83909  | <i>Epeolus</i> | <i>Epeolus americanus</i>    |
| BOWGF84009  | <i>Epeolus</i> | <i>Epeolus americanus</i>    |
| BOWGF84109  | <i>Epeolus</i> | <i>Epeolus americanus</i>    |
| BOWGF84209  | <i>Epeolus</i> | <i>Epeolus americanus</i>    |
| BOWGF84309  | <i>Epeolus</i> | <i>Epeolus americanus</i>    |
| BOWGF84409  | <i>Epeolus</i> | <i>Epeolus americanus</i>    |
| BOWGF84509  | <i>Epeolus</i> | <i>Epeolus americanus</i>    |
| BOWGF84609  | <i>Epeolus</i> | <i>Epeolus americanus</i>    |
| BEECB107107 | <i>Epeolus</i> | <i>Epeolus andriyi</i>       |
| BOWGF348816 | <i>Epeolus</i> | <i>Epeolus asperatus</i>     |
| BOWGF351416 | <i>Epeolus</i> | <i>Epeolus asperatus</i>     |
| NTCOL33915  | <i>Epeolus</i> | <i>Epeolus asperatus</i>     |
| NTCOL33515  | <i>Epeolus</i> | <i>Epeolus attenboroughi</i> |
| BOWGF399017 | <i>Epeolus</i> | <i>Epeolus australis</i>     |
| BOWGF399317 | <i>Epeolus</i> | <i>Epeolus australis</i>     |
| BEECA18706  | <i>Epeolus</i> | <i>Epeolus autumnalis</i>    |
| BEECA18806  | <i>Epeolus</i> | <i>Epeolus autumnalis</i>    |
| BOWGF351216 | <i>Epeolus</i> | <i>Epeolus autumnalis</i>    |
| CRHIC17915  | <i>Epeolus</i> | <i>Epeolus autumnalis</i>    |
| HDBNS20404  | <i>Epeolus</i> | <i>Epeolus autumnalis</i>    |
| HGPPH08810  | <i>Epeolus</i> | <i>Epeolus autumnalis</i>    |
| RBINA401813 | <i>Epeolus</i> | <i>Epeolus autumnalis</i>    |
| RBINA414213 | <i>Epeolus</i> | <i>Epeolus autumnalis</i>    |
| RBINA414413 | <i>Epeolus</i> | <i>Epeolus autumnalis</i>    |
| RBINA414913 | <i>Epeolus</i> | <i>Epeolus autumnalis</i>    |
| BOTWC132716 | <i>Epeolus</i> | <i>Epeolus axillaris</i>     |
| BOTWC132916 | <i>Epeolus</i> | <i>Epeolus axillaris</i>     |
| NTCOL32215  | <i>Epeolus</i> | <i>Epeolus axillaris</i>     |
| NTCOL31515  | <i>Epeolus</i> | <i>Epeolus barberiellus</i>  |
| NTCOL31715  | <i>Epeolus</i> | <i>Epeolus barberiellus</i>  |
| BOWGF337714 | <i>Epeolus</i> | <i>Epeolus basili</i>        |
| BOWGF338314 | <i>Epeolus</i> | <i>Epeolus basili</i>        |
| BOWGF400417 | <i>Epeolus</i> | <i>Epeolus basili</i>        |
| BOWGF348016 | <i>Epeolus</i> | <i>Epeolus bifasciatus</i>   |
| BOWGF348216 | <i>Epeolus</i> | <i>Epeolus bifasciatus</i>   |
| BOWGF381116 | <i>Epeolus</i> | <i>Epeolus bifasciatus</i>   |
| BOTWC107816 | <i>Epeolus</i> | <i>Epeolus brumleyi</i>      |
| BOTWC112716 | <i>Epeolus</i> | <i>Epeolus brumleyi</i>      |



|             |                |                               |
|-------------|----------------|-------------------------------|
| BOWGF349016 | <i>Epeolus</i> | <i>Epeolus brumleyi</i>       |
| ENAM00416   | <i>Epeolus</i> | <i>Epeolus brumleyi</i>       |
| BOTWC110816 | <i>Epeolus</i> | <i>Epeolus canadensis</i>     |
| BOTWC111416 | <i>Epeolus</i> | <i>Epeolus canadensis</i>     |
| BOWGF355016 | <i>Epeolus</i> | <i>Epeolus canadensis</i>     |
| BOWGF388317 | <i>Epeolus</i> | <i>Epeolus canadensis</i>     |
| BOWGF389217 | <i>Epeolus</i> | <i>Epeolus canadensis</i>     |
| ENAM01516   | <i>Epeolus</i> | <i>Epeolus canadensis</i>     |
| ENAM01716   | <i>Epeolus</i> | <i>Epeolus canadensis</i>     |
| NTCOL39417  | <i>Epeolus</i> | <i>Epeolus canadensis</i>     |
| BOTWC110616 | <i>Epeolus</i> | <i>Epeolus carolinus</i>      |
| WASPS32414  | <i>Epeolus</i> | <i>Epeolus carolinus</i>      |
| BEEAF63715  | <i>Epeolus</i> | <i>Epeolus chamaesarachae</i> |
| BEEAF63915  | <i>Epeolus</i> | <i>Epeolus chamaesarachae</i> |
| BOWGF337914 | <i>Epeolus</i> | <i>Epeolus chamaesarachae</i> |
| BOWGF338114 | <i>Epeolus</i> | <i>Epeolus chamaesarachae</i> |
| BOTWC111116 | <i>Epeolus</i> | <i>Epeolus claripennis</i>    |
| BOWGF356116 | <i>Epeolus</i> | <i>Epeolus compactus</i>      |
| NTCOL03615  | <i>Epeolus</i> | <i>Epeolus compactus</i>      |
| NTCOL16215  | <i>Epeolus</i> | <i>Epeolus compactus</i>      |
| NTCOL16615  | <i>Epeolus</i> | <i>Epeolus compactus</i>      |
| NTCOL17415  | <i>Epeolus</i> | <i>Epeolus compactus</i>      |
| NTCOL50017  | <i>Epeolus</i> | <i>Epeolus compactus</i>      |
| BCHYM39613  | <i>Epeolus</i> | <i>Epeolus cruciger</i>       |
| BCHYM39713  | <i>Epeolus</i> | <i>Epeolus cruciger</i>       |
| BEEEE25215  | <i>Epeolus</i> | <i>Epeolus cruciger</i>       |
| BOTWC152418 | <i>Epeolus</i> | <i>Epeolus cruciger</i>       |
| FBAPB52309  | <i>Epeolus</i> | <i>Epeolus cruciger</i>       |
| FBAPB52409  | <i>Epeolus</i> | <i>Epeolus cruciger</i>       |
| FBAPB52509  | <i>Epeolus</i> | <i>Epeolus cruciger</i>       |
| FBAPB52609  | <i>Epeolus</i> | <i>Epeolus cruciger</i>       |
| FBAPC46610  | <i>Epeolus</i> | <i>Epeolus cruciger</i>       |
| GBACU218013 | <i>Epeolus</i> | <i>Epeolus cruciger</i>       |
| GBACU218113 | <i>Epeolus</i> | <i>Epeolus cruciger</i>       |
| GBACU218213 | <i>Epeolus</i> | <i>Epeolus cruciger</i>       |
| GBACU84612  | <i>Epeolus</i> | <i>Epeolus cruciger</i>       |
| NOBEE07009  | <i>Epeolus</i> | <i>Epeolus cruciger</i>       |
| NOBEE07109  | <i>Epeolus</i> | <i>Epeolus cruciger</i>       |
| BOWGF381816 | <i>Epeolus</i> | <i>Epeolus deyrupi</i>        |
| BOWGF383816 | <i>Epeolus</i> | <i>Epeolus deyrupi</i>        |
| BOWGF384016 | <i>Epeolus</i> | <i>Epeolus deyrupi</i>        |
| BOWGF400817 | <i>Epeolus</i> | <i>Epeolus diadematus</i>     |
| BOWGF398017 | <i>Epeolus</i> | <i>Epeolus erigeronis</i>     |
| BOWGF398817 | <i>Epeolus</i> | <i>Epeolus erigeronis</i>     |
| BOWGF400117 | <i>Epeolus</i> | <i>Epeolus erigeronis</i>     |
| BOTWC191119 | <i>Epeolus</i> | <i>Epeolus fallax</i>         |

|             |                |                               |
|-------------|----------------|-------------------------------|
| BOWGF354616 | <i>Epeolus</i> | <i>Epeolus ferrarii</i>       |
| BOWGF384416 | <i>Epeolus</i> | <i>Epeolus ferrarii</i>       |
| BOTWC152618 | <i>Epeolus</i> | <i>Epeolus flavociliatus</i>  |
| BOWGF398617 | <i>Epeolus</i> | <i>Epeolus flavofasciatus</i> |
| ENAM01916   | <i>Epeolus</i> | <i>Epeolus flavofasciatus</i> |
| BOTWC151517 | <i>Epeolus</i> | <i>Epeolus floridensis</i>    |
| ENAM06716   | <i>Epeolus</i> | <i>Epeolus floridensis</i>    |
| ENAM07116   | <i>Epeolus</i> | <i>Epeolus floridensis</i>    |
| BEEAF65415  | <i>Epeolus</i> | <i>Epeolus fumipennis</i>     |
| BEEAF65515  | <i>Epeolus</i> | <i>Epeolus fumipennis</i>     |
| NTCOL51317  | <i>Epeolus</i> | <i>Epeolus gibbsi</i>         |
| BOWGF386617 | <i>Epeolus</i> | <i>Epeolus glabratus</i>      |
| ENAM05016   | <i>Epeolus</i> | <i>Epeolus glabratus</i>      |
| NTCOL28715  | <i>Epeolus</i> | <i>Epeolus glabratus</i>      |
| BOWGF397717 | <i>Epeolus</i> | <i>Epeolus howardi</i>        |
| BOWGF397517 | <i>Epeolus</i> | <i>Epeolus ilicis</i>         |
| BOTWC111616 | <i>Epeolus</i> | <i>Epeolus inornatus</i>      |
| BOWGF375316 | <i>Epeolus</i> | <i>Epeolus interruptus</i>    |
| BOWGF375516 | <i>Epeolus</i> | <i>Epeolus interruptus</i>    |
| BOWGF376216 | <i>Epeolus</i> | <i>Epeolus interruptus</i>    |
| ENAM02116   | <i>Epeolus</i> | <i>Epeolus interruptus</i>    |
| BBHYA129912 | <i>Epeolus</i> | <i>Epeolus lectoides</i>      |
| BEECA53706  | <i>Epeolus</i> | <i>Epeolus lectoides</i>      |
| BEECA54806  | <i>Epeolus</i> | <i>Epeolus lectoides</i>      |
| BEECA54906  | <i>Epeolus</i> | <i>Epeolus lectoides</i>      |
| BOTWC111216 | <i>Epeolus</i> | <i>Epeolus lectoides</i>      |
| BOWGF382716 | <i>Epeolus</i> | <i>Epeolus lectoides</i>      |
| CNPPE121212 | <i>Epeolus</i> | <i>Epeolus lectoides</i>      |
| CNPPE124512 | <i>Epeolus</i> | <i>Epeolus lectoides</i>      |
| ENAM08416   | <i>Epeolus</i> | <i>Epeolus lectoides</i>      |
| NTCOL39117  | <i>Epeolus</i> | <i>Epeolus lectoides</i>      |
| NTCOL40017  | <i>Epeolus</i> | <i>Epeolus lectoides</i>      |
| ENAM00216   | <i>Epeolus</i> | <i>Epeolus lectus</i>         |
| NTCOL39817  | <i>Epeolus</i> | <i>Epeolus lectus</i>         |
| BOTWC108516 | <i>Epeolus</i> | <i>Epeolus luteipennis</i>    |
| GBACU84412  | <i>Epeolus</i> | <i>Epeolus marginatus</i>     |
| GBACU84512  | <i>Epeolus</i> | <i>Epeolus marginatus</i>     |
| BEEAF65715  | <i>Epeolus</i> | <i>Epeolus mesillae</i>       |
| BOFTW113115 | <i>Epeolus</i> | <i>Epeolus mesillae</i>       |
| BOWGF104310 | <i>Epeolus</i> | <i>Epeolus mesillae</i>       |
| BOWGF314714 | <i>Epeolus</i> | <i>Epeolus mesillae</i>       |
| BOWGF348416 | <i>Epeolus</i> | <i>Epeolus mesillae</i>       |
| BOWGF348616 | <i>Epeolus</i> | <i>Epeolus mesillae</i>       |
| BOWGF69509  | <i>Epeolus</i> | <i>Epeolus mesillae</i>       |
| BOWGF69609  | <i>Epeolus</i> | <i>Epeolus mesillae</i>       |
| BOWGF69709  | <i>Epeolus</i> | <i>Epeolus mesillae</i>       |

|             |                |                              |
|-------------|----------------|------------------------------|
| BOWGF69809  | <i>Epeolus</i> | <i>Epeolus mesillae</i>      |
| BBHY118510  | <i>Epeolus</i> | <i>Epeolus minimus</i>       |
| BBHYJ61210  | <i>Epeolus</i> | <i>Epeolus minimus</i>       |
| BBHYL37210  | <i>Epeolus</i> | <i>Epeolus minimus</i>       |
| BEEAF64415  | <i>Epeolus</i> | <i>Epeolus minimus</i>       |
| BEECB102507 | <i>Epeolus</i> | <i>Epeolus minimus</i>       |
| BEECB87407  | <i>Epeolus</i> | <i>Epeolus minimus</i>       |
| BEECB88107  | <i>Epeolus</i> | <i>Epeolus minimus</i>       |
| BEECE48010  | <i>Epeolus</i> | <i>Epeolus minimus</i>       |
| BEECE48110  | <i>Epeolus</i> | <i>Epeolus minimus</i>       |
| BEECF43711  | <i>Epeolus</i> | <i>Epeolus minimus</i>       |
| BEECF97813  | <i>Epeolus</i> | <i>Epeolus minimus</i>       |
| BOFTW111315 | <i>Epeolus</i> | <i>Epeolus minimus</i>       |
| BOWGF356416 | <i>Epeolus</i> | <i>Epeolus minimus</i>       |
| BOWGF389417 | <i>Epeolus</i> | <i>Epeolus minimus</i>       |
| ENAM01216   | <i>Epeolus</i> | <i>Epeolus minimus</i>       |
| NTCOL13315  | <i>Epeolus</i> | <i>Epeolus minimus</i>       |
| NTCOL30215  | <i>Epeolus</i> | <i>Epeolus minimus</i>       |
| NTCOL30415  | <i>Epeolus</i> | <i>Epeolus minimus</i>       |
| NTCOL31915  | <i>Epeolus</i> | <i>Epeolus minimus</i>       |
| NTCOL32115  | <i>Epeolus</i> | <i>Epeolus minimus</i>       |
| NTCOL50417  | <i>Epeolus</i> | <i>Epeolus minimus</i>       |
| NTCOL50617  | <i>Epeolus</i> | <i>Epeolus minimus</i>       |
| WASPS37514  | <i>Epeolus</i> | <i>Epeolus minimus</i>       |
| BEEAF63115  | <i>Epeolus</i> | <i>Epeolus nebulosus</i>     |
| BEEAF63315  | <i>Epeolus</i> | <i>Epeolus novomexicanus</i> |
| BOTWC113116 | <i>Epeolus</i> | <i>Epeolus novomexicanus</i> |
| BEEAF65015  | <i>Epeolus</i> | <i>Epeolus obscuripes</i>    |
| ENAM00816   | <i>Epeolus</i> | <i>Epeolus obscuripes</i>    |
| NTCOL22015  | <i>Epeolus</i> | <i>Epeolus obscuripes</i>    |
| NTCOL33715  | <i>Epeolus</i> | <i>Epeolus odyneroides</i>   |
| BEEAF64615  | <i>Epeolus</i> | <i>Epeolus olympiellus</i>   |
| BEECB53807  | <i>Epeolus</i> | <i>Epeolus olympiellus</i>   |
| BEECB55407  | <i>Epeolus</i> | <i>Epeolus olympiellus</i>   |
| BEECB55507  | <i>Epeolus</i> | <i>Epeolus olympiellus</i>   |
| BEECB88207  | <i>Epeolus</i> | <i>Epeolus olympiellus</i>   |
| BEECC21408  | <i>Epeolus</i> | <i>Epeolus olympiellus</i>   |
| BOWGF338514 | <i>Epeolus</i> | <i>Epeolus olympiellus</i>   |
| BOWGF355916 | <i>Epeolus</i> | <i>Epeolus olympiellus</i>   |
| NGNAI47713  | <i>Epeolus</i> | <i>Epeolus olympiellus</i>   |
| NGNAS142714 | <i>Epeolus</i> | <i>Epeolus olympiellus</i>   |
| NGNAX202914 | <i>Epeolus</i> | <i>Epeolus olympiellus</i>   |
| NGNAX203414 | <i>Epeolus</i> | <i>Epeolus olympiellus</i>   |
| NGNAX207714 | <i>Epeolus</i> | <i>Epeolus olympiellus</i>   |
| NGNAY284814 | <i>Epeolus</i> | <i>Epeolus olympiellus</i>   |
| NTCOL12515  | <i>Epeolus</i> | <i>Epeolus olympiellus</i>   |

|             |                |                             |
|-------------|----------------|-----------------------------|
| NTCOL12715  | <i>Epeolus</i> | <i>Epeolus olympiellus</i>  |
| NTCOL13115  | <i>Epeolus</i> | <i>Epeolus olympiellus</i>  |
| NTCOL15415  | <i>Epeolus</i> | <i>Epeolus olympiellus</i>  |
| NTCOL15815  | <i>Epeolus</i> | <i>Epeolus olympiellus</i>  |
| NTCOL16015  | <i>Epeolus</i> | <i>Epeolus olympiellus</i>  |
| NTCOL16415  | <i>Epeolus</i> | <i>Epeolus olympiellus</i>  |
| NTCOL17215  | <i>Epeolus</i> | <i>Epeolus olympiellus</i>  |
| NTCOL17615  | <i>Epeolus</i> | <i>Epeolus olympiellus</i>  |
| NTCOL18015  | <i>Epeolus</i> | <i>Epeolus olympiellus</i>  |
| NTCOL18215  | <i>Epeolus</i> | <i>Epeolus olympiellus</i>  |
| NTCOL20615  | <i>Epeolus</i> | <i>Epeolus olympiellus</i>  |
| NTCOL21415  | <i>Epeolus</i> | <i>Epeolus olympiellus</i>  |
| BOWGF398217 | <i>Epeolus</i> | <i>Epeolus packeri</i>      |
| BEECA55106  | <i>Epeolus</i> | <i>Epeolus pusillus</i>     |
| NTCOL38717  | <i>Epeolus</i> | <i>Epeolus pusillus</i>     |
| NTCOL38917  | <i>Epeolus</i> | <i>Epeolus pusillus</i>     |
| NTCOL39617  | <i>Epeolus</i> | <i>Epeolus pusillus</i>     |
| NTCOL52317  | <i>Epeolus</i> | <i>Epeolus pusillus</i>     |
| BOWGF386917 | <i>Epeolus</i> | <i>Epeolus rufulus</i>      |
| BOTWC190919 | <i>Epeolus</i> | <i>Epeolus schummeli</i>    |
| FBAPC99211  | <i>Epeolus</i> | <i>Epeolus schummeli</i>    |
| BBHEC08009  | <i>Epeolus</i> | <i>Epeolus scutellaris</i>  |
| BBHEC53809  | <i>Epeolus</i> | <i>Epeolus scutellaris</i>  |
| BBHYE21710  | <i>Epeolus</i> | <i>Epeolus scutellaris</i>  |
| BOWGF355316 | <i>Epeolus</i> | <i>Epeolus scutellaris</i>  |
| BOWGF355716 | <i>Epeolus</i> | <i>Epeolus scutellaris</i>  |
| HDBNS20604  | <i>Epeolus</i> | <i>Epeolus scutellaris</i>  |
| NTCOL16815  | <i>Epeolus</i> | <i>Epeolus scutellaris</i>  |
| NTCOL21815  | <i>Epeolus</i> | <i>Epeolus scutellaris</i>  |
| NTCOL38117  | <i>Epeolus</i> | <i>Epeolus scutellaris</i>  |
| NTCOL38317  | <i>Epeolus</i> | <i>Epeolus scutellaris</i>  |
| NTCOL38517  | <i>Epeolus</i> | <i>Epeolus scutellaris</i>  |
| SMTPO479215 | <i>Epeolus</i> | <i>Epeolus scutellaris</i>  |
| TTHYW97608  | <i>Epeolus</i> | <i>Epeolus scutellaris</i>  |
| TTHYW97708  | <i>Epeolus</i> | <i>Epeolus scutellaris</i>  |
| BOFTW110215 | <i>Epeolus</i> | <i>Epeolus splendidus</i>   |
| BOFTW118115 | <i>Epeolus</i> | <i>Epeolus splendidus</i>   |
| NTCOL47617  | <i>Epeolus</i> | <i>Epeolus tarsalis</i>     |
| BOTWC106616 | <i>Epeolus</i> | <i>Epeolus tessieris</i>    |
| BOTWC112316 | <i>Epeolus</i> | <i>Epeolus tessieris</i>    |
| NTCOL48017  | <i>Epeolus</i> | <i>Epeolus transitorius</i> |
| BEEEE15315  | <i>Epeolus</i> | <i>Epeolus variegatus</i>   |
| BEEEE22015  | <i>Epeolus</i> | <i>Epeolus variegatus</i>   |
| FBAPB52709  | <i>Epeolus</i> | <i>Epeolus variegatus</i>   |
| FBAPB52809  | <i>Epeolus</i> | <i>Epeolus variegatus</i>   |
| FBAPC46410  | <i>Epeolus</i> | <i>Epeolus variegatus</i>   |

|               |                  |                           |                         |
|---------------|------------------|---------------------------|-------------------------|
| FBHAP40009    | <i>Epeolus</i>   | <i>Epeolus variegatus</i> |                         |
| FBHAP40109    | <i>Epeolus</i>   | <i>Epeolus variegatus</i> |                         |
| GBACU115512   | <i>Epeolus</i>   | <i>Epeolus variegatus</i> |                         |
| GBACU115612   | <i>Epeolus</i>   | <i>Epeolus variegatus</i> |                         |
| GBACU115712   | <i>Epeolus</i>   | <i>Epeolus variegatus</i> |                         |
| GBMNB6250420  | <i>Epeolus</i>   | <i>Epeolus variegatus</i> |                         |
| BOTWA198512   | <i>Epeolus</i>   | <i>Epeolus variolosus</i> |                         |
| BOTWA198612   | <i>Epeolus</i>   | <i>Epeolus variolosus</i> |                         |
| GMAFA38515    | <i>Epeolus</i>   | <i>Epeolus variolosus</i> |                         |
| BOTWC111016   | <i>Epeolus</i>   | <i>Epeolus zonatus</i>    |                         |
| WASPS32314    | <i>Epeolus</i>   | <i>Epeolus zonatus</i>    |                         |
| ASINH126312   | <i>Epicharis</i> | <i>Epicharis angulosa</i> |                         |
| ASINH126712   | <i>Epicharis</i> | <i>Epicharis angulosa</i> |                         |
| ASINH126912   | <i>Epicharis</i> | <i>Epicharis lunulata</i> |                         |
| ASINH127012   | <i>Epicharis</i> | <i>Epicharis lunulata</i> |                         |
| ASINH127112   | <i>Epicharis</i> | <i>Epicharis lunulata</i> |                         |
| ASINH127212   | <i>Epicharis</i> | <i>Epicharis lunulata</i> |                         |
| ASINH127312   | <i>Epicharis</i> | <i>Epicharis lunulata</i> |                         |
| ASINH127412   | <i>Epicharis</i> | <i>Epicharis lunulata</i> |                         |
| ASINH127512   | <i>Epicharis</i> | <i>Epicharis lunulata</i> |                         |
| SICOB66018    | <i>Epicharis</i> | <i>Epicharis maculata</i> |                         |
| GBMNB6184820  | <i>Ericrocis</i> | <i>Ericrocis lata</i>     |                         |
| SICOB67118    | <i>Ericrocis</i> | <i>Ericrocis lata</i>     |                         |
| SICOB67218    | <i>Ericrocis</i> | <i>Ericrocis lata</i>     |                         |
| GBAH1677419   | <i>Ericrocis</i> | <i>Ericrocis pintada</i>  |                         |
| GBMIN14277118 | <i>Eucera</i>    | <i>Eucera aeolopus</i>    |                         |
| SICOB68718    | <i>Eucera</i>    | <i>Eucera alborufa</i>    |                         |
| GBMIN14275718 | <i>Eucera</i>    | <i>Eucera alfkeni</i>     |                         |
| GBMIN14276218 | <i>Eucera</i>    | <i>Eucera algira</i>      |                         |
| DIAL19206     | <i>Eucera</i>    | <i>Eucera atriventris</i> |                         |
| GBMIN14275318 | <i>Eucera</i>    | <i>Eucera bidentata</i>   |                         |
| ABEE18317     | <i>Eucera</i>    | <i>Eucera chrysopyga</i>  | <i>Eucera pollinosa</i> |
| FBAPD88411    | <i>Eucera</i>    | <i>Eucera chrysopyga</i>  |                         |
| FBAPD88511    | <i>Eucera</i>    | <i>Eucera chrysopyga</i>  |                         |
| FBAPD88611    | <i>Eucera</i>    | <i>Eucera chrysopyga</i>  |                         |
| GBAH1853219   | <i>Eucera</i>    | <i>Eucera chrysopyga</i>  |                         |
| POLLE267619   | <i>Eucera</i>    | <i>Eucera chrysopyga</i>  |                         |
| FBAPB54409    | <i>Eucera</i>    | <i>Eucera cineraria</i>   |                         |
| FBAPB54509    | <i>Eucera</i>    | <i>Eucera cineraria</i>   |                         |
| FBAPB54609    | <i>Eucera</i>    | <i>Eucera cineraria</i>   |                         |
| FBAPB54709    | <i>Eucera</i>    | <i>Eucera cineraria</i>   |                         |
| FBAPC18410    | <i>Eucera</i>    | <i>Eucera cineraria</i>   |                         |
| FBAPC18510    | <i>Eucera</i>    | <i>Eucera cineraria</i>   |                         |
| FBAPC18610    | <i>Eucera</i>    | <i>Eucera cineraria</i>   |                         |
| FBAPC18710    | <i>Eucera</i>    | <i>Eucera cineraria</i>   |                         |
| GBMIN14275918 | <i>Eucera</i>    | <i>Eucera clypeata</i>    |                         |

|               |               |                           |                          |
|---------------|---------------|---------------------------|--------------------------|
| BEECC58009    | <i>Eucera</i> | <i>Eucera cordleyi</i>    |                          |
| GBMIN14276618 | <i>Eucera</i> | <i>Eucera curvitaris</i>  |                          |
| ABEE20717     | <i>Eucera</i> | <i>Eucera dimidiata</i>   | <i>Eucera fulvescens</i> |
| ABEE20817     | <i>Eucera</i> | <i>Eucera dimidiata</i>   | <i>Eucera fulvescens</i> |
| MAHYM59311    | <i>Eucera</i> | <i>Eucera edwardsii</i>   |                          |
| GBMNB6225220  | <i>Eucera</i> | <i>Eucera eucnemidea</i>  |                          |
| GBAH1740919   | <i>Eucera</i> | <i>Eucera floralia</i>    |                          |
| GBMNB6184420  | <i>Eucera</i> | <i>Eucera frater</i>      |                          |
| GBMIN14276318 | <i>Eucera</i> | <i>Eucera furfurea</i>    |                          |
| GBMIN14275518 | <i>Eucera</i> | <i>Eucera gaullei</i>     |                          |
| BUSA36605     | <i>Eucera</i> | <i>Eucera hamata</i>      |                          |
| GBMNB6311020  | <i>Eucera</i> | <i>Eucera hamata</i>      |                          |
| FBAPB54809    | <i>Eucera</i> | <i>Eucera interrupta</i>  |                          |
| FBAPB54909    | <i>Eucera</i> | <i>Eucera interrupta</i>  |                          |
| FBAPB55109    | <i>Eucera</i> | <i>Eucera interrupta</i>  |                          |
| GBMIN14277718 | <i>Eucera</i> | <i>Eucera interrupta</i>  |                          |
| GBMIN14276818 | <i>Eucera</i> | <i>Eucera kilikiae</i>    |                          |
| GBMIN14277218 | <i>Eucera</i> | <i>Eucera kullenbergi</i> |                          |
| GBMIN14277918 | <i>Eucera</i> | <i>Eucera laxiscopa</i>   |                          |
| BEEEE23215    | <i>Eucera</i> | <i>Eucera longicornis</i> |                          |
| BEEEE23315    | <i>Eucera</i> | <i>Eucera longicornis</i> |                          |
| FBAPB55209    | <i>Eucera</i> | <i>Eucera longicornis</i> |                          |
| FBAPD41411    | <i>Eucera</i> | <i>Eucera longicornis</i> |                          |
| FBAPD70811    | <i>Eucera</i> | <i>Eucera longicornis</i> |                          |
| GMCHA74214    | <i>Eucera</i> | <i>Eucera longicornis</i> |                          |
| GMCHA74314    | <i>Eucera</i> | <i>Eucera longicornis</i> |                          |
| GMCHA74514    | <i>Eucera</i> | <i>Eucera longicornis</i> |                          |
| GMGMK08414    | <i>Eucera</i> | <i>Eucera longicornis</i> |                          |
| ABBOL09215    | <i>Eucera</i> | <i>Eucera nigrescens</i>  |                          |
| ABBOL09315    | <i>Eucera</i> | <i>Eucera nigrescens</i>  |                          |
| BCHYM151513   | <i>Eucera</i> | <i>Eucera nigrescens</i>  |                          |
| FBAPB55709    | <i>Eucera</i> | <i>Eucera nigrescens</i>  |                          |
| FBAPC18010    | <i>Eucera</i> | <i>Eucera nigrescens</i>  |                          |
| FBAPC18110    | <i>Eucera</i> | <i>Eucera nigrescens</i>  |                          |
| FBAPD10111    | <i>Eucera</i> | <i>Eucera nigrescens</i>  |                          |
| FBAPD10211    | <i>Eucera</i> | <i>Eucera nigrescens</i>  |                          |
| FBAPD10311    | <i>Eucera</i> | <i>Eucera nigrescens</i>  |                          |
| FBAPD10411    | <i>Eucera</i> | <i>Eucera nigrescens</i>  |                          |
| FBAPD41211    | <i>Eucera</i> | <i>Eucera nigrescens</i>  |                          |
| FBHAP39809    | <i>Eucera</i> | <i>Eucera nigrescens</i>  |                          |
| FBHAP39909    | <i>Eucera</i> | <i>Eucera nigrescens</i>  |                          |
| GBAH1853319   | <i>Eucera</i> | <i>Eucera nigrescens</i>  |                          |
| GBCHA60213    | <i>Eucera</i> | <i>Eucera nigrescens</i>  |                          |
| GBMIN14277318 | <i>Eucera</i> | <i>Eucera nigrescens</i>  |                          |
| GBMIN14277518 | <i>Eucera</i> | <i>Eucera nigrescens</i>  |                          |
| GBMIN7893717  | <i>Eucera</i> | <i>Eucera nigrescens</i>  |                          |

|               |               |                           |                            |
|---------------|---------------|---------------------------|----------------------------|
| GBMNB6225320  | <i>Eucera</i> | <i>Eucera nigrescens</i>  |                            |
| GBMNB6225420  | <i>Eucera</i> | <i>Eucera nigrescens</i>  |                            |
| GBMNB6225520  | <i>Eucera</i> | <i>Eucera nigrescens</i>  |                            |
| GMBUA09814    | <i>Eucera</i> | <i>Eucera nigrescens</i>  |                            |
| GMGMH143514   | <i>Eucera</i> | <i>Eucera nigrescens</i>  |                            |
| GMGMH147714   | <i>Eucera</i> | <i>Eucera nigrescens</i>  |                            |
| GMGMH147814   | <i>Eucera</i> | <i>Eucera nigrescens</i>  |                            |
| GMGMH148214   | <i>Eucera</i> | <i>Eucera nigrescens</i>  |                            |
| GMGMH148514   | <i>Eucera</i> | <i>Eucera nigrescens</i>  |                            |
| GMGMH148614   | <i>Eucera</i> | <i>Eucera nigrescens</i>  |                            |
| GMGMH148714   | <i>Eucera</i> | <i>Eucera nigrescens</i>  |                            |
| GMGMH148814   | <i>Eucera</i> | <i>Eucera nigrescens</i>  |                            |
| GMGMH148914   | <i>Eucera</i> | <i>Eucera nigrescens</i>  |                            |
| GMGMH149514   | <i>Eucera</i> | <i>Eucera nigrescens</i>  |                            |
| GMGMH149814   | <i>Eucera</i> | <i>Eucera nigrescens</i>  |                            |
| GMGMH150214   | <i>Eucera</i> | <i>Eucera nigrescens</i>  |                            |
| GMGMH150914   | <i>Eucera</i> | <i>Eucera nigrescens</i>  |                            |
| GMGMH159014   | <i>Eucera</i> | <i>Eucera nigrescens</i>  |                            |
| GMGMH159214   | <i>Eucera</i> | <i>Eucera nigrescens</i>  |                            |
| GMGMI01014    | <i>Eucera</i> | <i>Eucera nigrescens</i>  |                            |
| GMGMI02114    | <i>Eucera</i> | <i>Eucera nigrescens</i>  |                            |
| GMGMI03114    | <i>Eucera</i> | <i>Eucera nigrescens</i>  |                            |
| GMGMI03214    | <i>Eucera</i> | <i>Eucera nigrescens</i>  |                            |
| GMGMI03514    | <i>Eucera</i> | <i>Eucera nigrescens</i>  |                            |
| GMGMI03714    | <i>Eucera</i> | <i>Eucera nigrescens</i>  |                            |
| GMGMI05214    | <i>Eucera</i> | <i>Eucera nigrescens</i>  |                            |
| GMGMI06214    | <i>Eucera</i> | <i>Eucera nigrescens</i>  |                            |
| GMGMI08014    | <i>Eucera</i> | <i>Eucera nigrescens</i>  |                            |
| GMGMJ08014    | <i>Eucera</i> | <i>Eucera nigrescens</i>  |                            |
| GMGMJ09014    | <i>Eucera</i> | <i>Eucera nigrescens</i>  |                            |
| GMGMJ09514    | <i>Eucera</i> | <i>Eucera nigrescens</i>  |                            |
| GMGMJ10614    | <i>Eucera</i> | <i>Eucera nigrescens</i>  |                            |
| GMGMJ10714    | <i>Eucera</i> | <i>Eucera nigrescens</i>  |                            |
| GMGMJ12614    | <i>Eucera</i> | <i>Eucera nigrescens</i>  |                            |
| GMGMJ13414    | <i>Eucera</i> | <i>Eucera nigrescens</i>  |                            |
| GMGMJ30614    | <i>Eucera</i> | <i>Eucera nigrescens</i>  |                            |
| POLLE185719   | <i>Eucera</i> | <i>Eucera nigrescens</i>  |                            |
| POLLE206419   | <i>Eucera</i> | <i>Eucera nigrescens</i>  |                            |
| POLLE209119   | <i>Eucera</i> | <i>Eucera nigrescens</i>  |                            |
| POLLE212219   | <i>Eucera</i> | <i>Eucera nigrescens</i>  |                            |
| GBMIN14277618 | <i>Eucera</i> | <i>Eucera nigrilabris</i> |                            |
| GBMIN14277018 | <i>Eucera</i> | <i>Eucera nigrita</i>     | <i>Eucera albofasciata</i> |
| ABBOL03115    | <i>Eucera</i> | <i>Eucera nipponensis</i> |                            |
| GBMNB6311120  | <i>Eucera</i> | <i>Eucera numida</i>      |                            |
| GBMNB6311220  | <i>Eucera</i> | <i>Eucera numida</i>      |                            |
| ABBOL02015    | <i>Eucera</i> | <i>Eucera okinawae</i>    |                            |

|               |                  |                                    |                           |
|---------------|------------------|------------------------------------|---------------------------|
| ABBOL02115    | <i>Eucera</i>    | <i>Eucera okinawae</i>             |                           |
| GBMIN14278018 | <i>Eucera</i>    | <i>Eucera pici</i>                 |                           |
| GBMIN14277418 | <i>Eucera</i>    | <i>Eucera proxima</i>              |                           |
| GBMIN14278218 | <i>Eucera</i>    | <i>Eucera pseudeucnemidea</i>      |                           |
| ABBOL02915    | <i>Eucera</i>    | <i>Eucera sociabilis</i>           |                           |
| GBMIN14275618 | <i>Eucera</i>    | <i>Eucera spinipes</i>             |                           |
| GBMIN14276518 | <i>Eucera</i>    | <i>Eucera syriaca</i>              |                           |
| GBMIN14278118 | <i>Eucera</i>    | <i>Eucera vulpes</i>               |                           |
| GBMIN14280618 | <i>Eucera</i>    | <i>Tetraloniella tenuifasciata</i> |                           |
| ASINH06012    | <i>Eufriesea</i> | <i>Eufriesea anisochlora</i>       |                           |
| ASINH06112    | <i>Eufriesea</i> | <i>Eufriesea anisochlora</i>       |                           |
| ASINH06312    | <i>Eufriesea</i> | <i>Eufriesea anisochlora</i>       |                           |
| DRBEE05807    | <i>Eufriesea</i> | <i>Eufriesea anisochlora</i>       |                           |
| GBAH623709    | <i>Eufriesea</i> | <i>Eufriesea anisochlora</i>       |                           |
| OBP00605      | <i>Eufriesea</i> | <i>Eufriesea anisochlora</i>       |                           |
| OBP00705      | <i>Eufriesea</i> | <i>Eufriesea anisochlora</i>       |                           |
| OBP00805      | <i>Eufriesea</i> | <i>Eufriesea anisochlora</i>       |                           |
| OBP00905      | <i>Eufriesea</i> | <i>Eufriesea anisochlora</i>       |                           |
| OBP01005      | <i>Eufriesea</i> | <i>Eufriesea anisochlora</i>       |                           |
| GBMIN1229113  | <i>Eufriesea</i> | <i>Eufriesea atlantica</i>         |                           |
| GBMIN1229713  | <i>Eufriesea</i> | <i>Eufriesea auriceps</i>          |                           |
| GBMIN1232713  | <i>Eufriesea</i> | <i>Eufriesea auriceps</i>          |                           |
| DRBEE13807    | <i>Eufriesea</i> | <i>Eufriesea auripes</i>           |                           |
| BOFWM23308    | <i>Eufriesea</i> | <i>Eufriesea caerulescens</i>      |                           |
| DRBEE14407    | <i>Eufriesea</i> | <i>Eufriesea caerulescens</i>      | <i>Eufriesea caerulea</i> |
| GBAH619909    | <i>Eufriesea</i> | <i>Eufriesea caerulescens</i>      |                           |
| GBAH623609    | <i>Eufriesea</i> | <i>Eufriesea caerulescens</i>      |                           |
| GBAH628209    | <i>Eufriesea</i> | <i>Eufriesea chalybaea</i>         |                           |
| DRBEE13407    | <i>Eufriesea</i> | <i>Eufriesea chrysopyga</i>        |                           |
| GBAH631309    | <i>Eufriesea</i> | <i>Eufriesea chrysopyga</i>        |                           |
| ASINH07512    | <i>Eufriesea</i> | <i>Eufriesea concava</i>           |                           |
| GBAH635609    | <i>Eufriesea</i> | <i>Eufriesea concava</i>           |                           |
| GBAH627109    | <i>Eufriesea</i> | <i>Eufriesea corusca</i>           |                           |
| GBAH626809    | <i>Eufriesea</i> | <i>Eufriesea dressleri</i>         |                           |
| GBAH056406    | <i>Eufriesea</i> | <i>Eufriesea flaviventris</i>      |                           |
| GBAH634909    | <i>Eufriesea</i> | <i>Eufriesea lucida</i>            |                           |
| GBAH626009    | <i>Eufriesea</i> | <i>Eufriesea lucifera</i>          |                           |
| ASINH08612    | <i>Eufriesea</i> | <i>Eufriesea macroglossa</i>       |                           |
| ASINH08712    | <i>Eufriesea</i> | <i>Eufriesea macroglossa</i>       |                           |
| ASINH08812    | <i>Eufriesea</i> | <i>Eufriesea macroglossa</i>       |                           |
| ASINH08912    | <i>Eufriesea</i> | <i>Eufriesea macroglossa</i>       |                           |
| ASINH09012    | <i>Eufriesea</i> | <i>Eufriesea macroglossa</i>       |                           |
| ASINH09312    | <i>Eufriesea</i> | <i>Eufriesea macroglossa</i>       |                           |
| ASINH09412    | <i>Eufriesea</i> | <i>Eufriesea macroglossa</i>       |                           |
| ASINH09512    | <i>Eufriesea</i> | <i>Eufriesea macroglossa</i>       |                           |
| DRBEE06107    | <i>Eufriesea</i> | <i>Eufriesea macroglossa</i>       |                           |



|              |                  |                               |                         |
|--------------|------------------|-------------------------------|-------------------------|
| GBAH625509   | <i>Eufriesea</i> | <i>Eufriesea macroglossa</i>  |                         |
| GBAH626209   | <i>Eufriesea</i> | <i>Eufriesea magrettii</i>    |                         |
| GBAH629809   | <i>Eufriesea</i> | <i>Eufriesea mariana</i>      |                         |
| GBAH629909   | <i>Eufriesea</i> | <i>Eufriesea mariana</i>      |                         |
| ASINH09612   | <i>Eufriesea</i> | <i>Eufriesea mexicana</i>     |                         |
| ASINH09812   | <i>Eufriesea</i> | <i>Eufriesea mexicana</i>     |                         |
| ASINH10012   | <i>Eufriesea</i> | <i>Eufriesea mexicana</i>     |                         |
| ASINH10212   | <i>Eufriesea</i> | <i>Eufriesea mexicana</i>     |                         |
| ASINH10412   | <i>Eufriesea</i> | <i>Eufriesea mexicana</i>     |                         |
| BOFWM25208   | <i>Eufriesea</i> | <i>Eufriesea mexicana</i>     |                         |
| GBAH624009   | <i>Eufriesea</i> | <i>Eufriesea mexicana</i>     |                         |
| GBAH627309   | <i>Eufriesea</i> | <i>Eufriesea mussitans</i>    |                         |
| GBMIN1232613 | <i>Eufriesea</i> | <i>Eufriesea nigrohirta</i>   |                         |
| GBMIN1229213 | <i>Eufriesea</i> | <i>Eufriesea nordestina</i>   |                         |
| GBMIN1229313 | <i>Eufriesea</i> | <i>Eufriesea nordestina</i>   |                         |
| GBMIN1229413 | <i>Eufriesea</i> | <i>Eufriesea nordestina</i>   |                         |
| GBMIN1229513 | <i>Eufriesea</i> | <i>Eufriesea nordestina</i>   |                         |
| GBMIN1232213 | <i>Eufriesea</i> | <i>Eufriesea nordestina</i>   |                         |
| GBMIN1232313 | <i>Eufriesea</i> | <i>Eufriesea nordestina</i>   |                         |
| GBMIN1232413 | <i>Eufriesea</i> | <i>Eufriesea nordestina</i>   |                         |
| GBMIN1232513 | <i>Eufriesea</i> | <i>Eufriesea nordestina</i>   |                         |
| GBAH630209   | <i>Eufriesea</i> | <i>Eufriesea ornata</i>       |                         |
| GBMIN1232013 | <i>Eufriesea</i> | <i>Eufriesea ornata</i>       |                         |
| GBAH623909   | <i>Eufriesea</i> | <i>Eufriesea pallida</i>      |                         |
| GBAH631409   | <i>Eufriesea</i> | <i>Eufriesea pulchra</i>      |                         |
| OBP08505     | <i>Eufriesea</i> | <i>Eufriesea pulchra</i>      |                         |
| GBAH636109   | <i>Eufriesea</i> | <i>Eufriesea rufocauda</i>    |                         |
| BOFWM25308   | <i>Eufriesea</i> | <i>Eufriesea rugosa</i>       |                         |
| GBAH623809   | <i>Eufriesea</i> | <i>Eufriesea rugosa</i>       |                         |
| ASINH12712   | <i>Eufriesea</i> | <i>Eufriesea schmidtiana</i>  |                         |
| ASINH12812   | <i>Eufriesea</i> | <i>Eufriesea schmidtiana</i>  |                         |
| ASINH12912   | <i>Eufriesea</i> | <i>Eufriesea schmidtiana</i>  |                         |
| ASINH13012   | <i>Eufriesea</i> | <i>Eufriesea schmidtiana</i>  |                         |
| DRBEE13707   | <i>Eufriesea</i> | <i>Eufriesea schmidtiana</i>  |                         |
| GBAH636209   | <i>Eufriesea</i> | <i>Eufriesea schmidtiana</i>  |                         |
| OBP08205     | <i>Eufriesea</i> | <i>Eufriesea schmidtiana</i>  |                         |
| OBP08305     | <i>Eufriesea</i> | <i>Eufriesea schmidtiana</i>  |                         |
| GBAH635809   | <i>Eufriesea</i> | <i>Eufriesea superba</i>      |                         |
| GBMIN1232113 | <i>Eufriesea</i> | <i>Eufriesea superba</i>      |                         |
| ASINH13112   | <i>Eufriesea</i> | <i>Eufriesea surinamensis</i> |                         |
| GBAH631209   | <i>Eufriesea</i> | <i>Eufriesea surinamensis</i> |                         |
| GBAH628409   | <i>Eufriesea</i> | <i>Eufriesea tucumana</i>     |                         |
| GBAH628509   | <i>Eufriesea</i> | <i>Eufriesea tucumana</i>     |                         |
| DRBEE06007   | <i>Eufriesea</i> | <i>Eufriesea venusta</i>      |                         |
| GBAH056506   | <i>Eufriesea</i> | <i>Eufriesea vidua</i>        | <i>Eufriesea xantha</i> |
| GBAH634109   | <i>Eufriesea</i> | <i>Eufriesea violacea</i>     |                         |

|            |                  |                             |
|------------|------------------|-----------------------------|
| GBAH628009 | <i>Eufriesea</i> | <i>Eufriesea violascens</i> |
| GBAH628109 | <i>Eufriesea</i> | <i>Eufriesea violascens</i> |
| ASINH14112 | <i>Euglossa</i>  | <i>Euglossa allosticta</i>  |
| ASINH14312 | <i>Euglossa</i>  | <i>Euglossa allosticta</i>  |
| ASINH14412 | <i>Euglossa</i>  | <i>Euglossa allosticta</i>  |
| ASINH14512 | <i>Euglossa</i>  | <i>Euglossa allosticta</i>  |
| ASINH14612 | <i>Euglossa</i>  | <i>Euglossa allosticta</i>  |
| ASINH14712 | <i>Euglossa</i>  | <i>Euglossa allosticta</i>  |
| ASINH15012 | <i>Euglossa</i>  | <i>Euglossa allosticta</i>  |
| DRBEE04807 | <i>Euglossa</i>  | <i>Euglossa allosticta</i>  |
| DRBEE08207 | <i>Euglossa</i>  | <i>Euglossa allosticta</i>  |
| GBAH630309 | <i>Euglossa</i>  | <i>Euglossa allosticta</i>  |
| OBP06605   | <i>Euglossa</i>  | <i>Euglossa allosticta</i>  |
| OBP06705   | <i>Euglossa</i>  | <i>Euglossa allosticta</i>  |
| OBP06905   | <i>Euglossa</i>  | <i>Euglossa allosticta</i>  |
| OBP07005   | <i>Euglossa</i>  | <i>Euglossa allosticta</i>  |
| OBP07105   | <i>Euglossa</i>  | <i>Euglossa allosticta</i>  |
| PLCOL54420 | <i>Euglossa</i>  | <i>Euglossa allosticta</i>  |
| PLCOL54520 | <i>Euglossa</i>  | <i>Euglossa allosticta</i>  |
| PLCOL54620 | <i>Euglossa</i>  | <i>Euglossa allosticta</i>  |
| PLCOL54720 | <i>Euglossa</i>  | <i>Euglossa allosticta</i>  |
| PLCOL54820 | <i>Euglossa</i>  | <i>Euglossa allosticta</i>  |
| PLCOL64720 | <i>Euglossa</i>  | <i>Euglossa allosticta</i>  |
| DRBEE12607 | <i>Euglossa</i>  | <i>Euglossa amazonica</i>   |
| DRBEE16907 | <i>Euglossa</i>  | <i>Euglossa amazonica</i>   |
| GBAH635409 | <i>Euglossa</i>  | <i>Euglossa amazonica</i>   |
| GBAH627509 | <i>Euglossa</i>  | <i>Euglossa analis</i>      |
| PLCOL42620 | <i>Euglossa</i>  | <i>Euglossa analis</i>      |
| DRBEE13107 | <i>Euglossa</i>  | <i>Euglossa annectans</i>   |
| GBAH633209 | <i>Euglossa</i>  | <i>Euglossa annectans</i>   |
| ASINH15112 | <i>Euglossa</i>  | <i>Euglossa asarophora</i>  |
| ASINH15212 | <i>Euglossa</i>  | <i>Euglossa asarophora</i>  |
| ASINH15312 | <i>Euglossa</i>  | <i>Euglossa asarophora</i>  |
| ASINH15412 | <i>Euglossa</i>  | <i>Euglossa asarophora</i>  |
| ASINH15512 | <i>Euglossa</i>  | <i>Euglossa asarophora</i>  |
| DRBEE05107 | <i>Euglossa</i>  | <i>Euglossa asarophora</i>  |
| GBAH160606 | <i>Euglossa</i>  | <i>Euglossa asarophora</i>  |
| GBAH620409 | <i>Euglossa</i>  | <i>Euglossa asarophora</i>  |
| GBAH632409 | <i>Euglossa</i>  | <i>Euglossa asarophora</i>  |
| GBAH632509 | <i>Euglossa</i>  | <i>Euglossa asarophora</i>  |
| PLCOL33220 | <i>Euglossa</i>  | <i>Euglossa asarophora</i>  |
| PLCOL33320 | <i>Euglossa</i>  | <i>Euglossa asarophora</i>  |
| PLCOL34620 | <i>Euglossa</i>  | <i>Euglossa asarophora</i>  |
| PLCOL34720 | <i>Euglossa</i>  | <i>Euglossa asarophora</i>  |
| PLCOL34820 | <i>Euglossa</i>  | <i>Euglossa asarophora</i>  |
| PLCOL34920 | <i>Euglossa</i>  | <i>Euglossa asarophora</i>  |

|            |                 |                               |
|------------|-----------------|-------------------------------|
| PLCOL36120 | <i>Euglossa</i> | <i>Euglossa asarophora</i>    |
| PLCOL36220 | <i>Euglossa</i> | <i>Euglossa asarophora</i>    |
| PLCOL36320 | <i>Euglossa</i> | <i>Euglossa asarophora</i>    |
| DRBEE10407 | <i>Euglossa</i> | <i>Euglossa atrovoneta</i>    |
| GBAH625809 | <i>Euglossa</i> | <i>Euglossa atrovoneta</i>    |
| GBAH630109 | <i>Euglossa</i> | <i>Euglossa augaspis</i>      |
| DRBEE12207 | <i>Euglossa</i> | <i>Euglossa azureoviridis</i> |
| DRBEE12507 | <i>Euglossa</i> | <i>Euglossa azureoviridis</i> |
| GBAH627909 | <i>Euglossa</i> | <i>Euglossa azureoviridis</i> |
| PLCOL60120 | <i>Euglossa</i> | <i>Euglossa azureoviridis</i> |
| PLCOL60220 | <i>Euglossa</i> | <i>Euglossa azureoviridis</i> |
| PLCOL62520 | <i>Euglossa</i> | <i>Euglossa azureoviridis</i> |
| DRBEE03307 | <i>Euglossa</i> | <i>Euglossa bidentata</i>     |
| GBAH624809 | <i>Euglossa</i> | <i>Euglossa bidentata</i>     |
| ASINH16512 | <i>Euglossa</i> | <i>Euglossa bursigera</i>     |
| ASINH16712 | <i>Euglossa</i> | <i>Euglossa bursigera</i>     |
| ASINH16812 | <i>Euglossa</i> | <i>Euglossa bursigera</i>     |
| ASINH16912 | <i>Euglossa</i> | <i>Euglossa bursigera</i>     |
| ASINH17112 | <i>Euglossa</i> | <i>Euglossa bursigera</i>     |
| ASINH17212 | <i>Euglossa</i> | <i>Euglossa bursigera</i>     |
| DRBEE13207 | <i>Euglossa</i> | <i>Euglossa bursigera</i>     |
| GBAH160806 | <i>Euglossa</i> | <i>Euglossa bursigera</i>     |
| GBAH624709 | <i>Euglossa</i> | <i>Euglossa bursigera</i>     |
| OBP07205   | <i>Euglossa</i> | <i>Euglossa bursigera</i>     |
| OBP07305   | <i>Euglossa</i> | <i>Euglossa bursigera</i>     |
| OBP07405   | <i>Euglossa</i> | <i>Euglossa bursigera</i>     |
| OBP07505   | <i>Euglossa</i> | <i>Euglossa bursigera</i>     |
| OBP07605   | <i>Euglossa</i> | <i>Euglossa bursigera</i>     |
| PLCOL61720 | <i>Euglossa</i> | <i>Euglossa bursigera</i>     |
| PLCOL65820 | <i>Euglossa</i> | <i>Euglossa bursigera</i>     |
| DRBEE17107 | <i>Euglossa</i> | <i>Euglossa chalybeata</i>    |
| GBAH630709 | <i>Euglossa</i> | <i>Euglossa chalybeata</i>    |
| PLCOL44120 | <i>Euglossa</i> | <i>Euglossa chalybeata</i>    |
| PLCOL44220 | <i>Euglossa</i> | <i>Euglossa chalybeata</i>    |
| PLCOL44320 | <i>Euglossa</i> | <i>Euglossa chalybeata</i>    |
| PLCOL44420 | <i>Euglossa</i> | <i>Euglossa chalybeata</i>    |
| PLCOL44520 | <i>Euglossa</i> | <i>Euglossa chalybeata</i>    |
| PLCOL44620 | <i>Euglossa</i> | <i>Euglossa chalybeata</i>    |
| PLCOL44720 | <i>Euglossa</i> | <i>Euglossa chalybeata</i>    |
| ASINH17412 | <i>Euglossa</i> | <i>Euglossa championi</i>     |
| ASINH17812 | <i>Euglossa</i> | <i>Euglossa championi</i>     |
| ASINH17912 | <i>Euglossa</i> | <i>Euglossa championi</i>     |
| ASINH18012 | <i>Euglossa</i> | <i>Euglossa championi</i>     |
| ASINH18112 | <i>Euglossa</i> | <i>Euglossa championi</i>     |
| ASINH18212 | <i>Euglossa</i> | <i>Euglossa championi</i>     |
| ASINH18312 | <i>Euglossa</i> | <i>Euglossa championi</i>     |

|            |                 |                           |
|------------|-----------------|---------------------------|
| ASINH18412 | <i>Euglossa</i> | <i>Euglossa championi</i> |
| DRBEE03907 | <i>Euglossa</i> | <i>Euglossa championi</i> |
| EMS07719   | <i>Euglossa</i> | <i>Euglossa championi</i> |
| EMS09019   | <i>Euglossa</i> | <i>Euglossa championi</i> |
| EMS09519   | <i>Euglossa</i> | <i>Euglossa championi</i> |
| GBAH632309 | <i>Euglossa</i> | <i>Euglossa championi</i> |
| PLCOL57520 | <i>Euglossa</i> | <i>Euglossa championi</i> |
| PLCOL57620 | <i>Euglossa</i> | <i>Euglossa championi</i> |
| PLCOL57720 | <i>Euglossa</i> | <i>Euglossa championi</i> |
| PLCOL57820 | <i>Euglossa</i> | <i>Euglossa championi</i> |
| PLCOL57920 | <i>Euglossa</i> | <i>Euglossa championi</i> |
| PLCOL58320 | <i>Euglossa</i> | <i>Euglossa championi</i> |
| PLCOL58420 | <i>Euglossa</i> | <i>Euglossa championi</i> |
| PLCOL58520 | <i>Euglossa</i> | <i>Euglossa championi</i> |
| PLCOL58620 | <i>Euglossa</i> | <i>Euglossa championi</i> |
| PLCOL58720 | <i>Euglossa</i> | <i>Euglossa championi</i> |
| PLCOL58820 | <i>Euglossa</i> | <i>Euglossa championi</i> |
| PLCOL58920 | <i>Euglossa</i> | <i>Euglossa championi</i> |
| PLCOL59020 | <i>Euglossa</i> | <i>Euglossa championi</i> |
| PLCOL59120 | <i>Euglossa</i> | <i>Euglossa championi</i> |
| PLCOL59220 | <i>Euglossa</i> | <i>Euglossa championi</i> |
| PLCOL59520 | <i>Euglossa</i> | <i>Euglossa championi</i> |
| PLCOL59620 | <i>Euglossa</i> | <i>Euglossa championi</i> |
| PLCOL59720 | <i>Euglossa</i> | <i>Euglossa championi</i> |
| PLCOL59820 | <i>Euglossa</i> | <i>Euglossa championi</i> |
| PLCOL59920 | <i>Euglossa</i> | <i>Euglossa championi</i> |
| PLCOL60020 | <i>Euglossa</i> | <i>Euglossa championi</i> |
| PLCOL61820 | <i>Euglossa</i> | <i>Euglossa championi</i> |
| PLCOL61920 | <i>Euglossa</i> | <i>Euglossa championi</i> |
| PLCOL62020 | <i>Euglossa</i> | <i>Euglossa championi</i> |
| PLCOL62120 | <i>Euglossa</i> | <i>Euglossa championi</i> |
| PLCOL62220 | <i>Euglossa</i> | <i>Euglossa championi</i> |
| PLCOL62620 | <i>Euglossa</i> | <i>Euglossa championi</i> |
| PLCOL62720 | <i>Euglossa</i> | <i>Euglossa championi</i> |
| PLCOL62820 | <i>Euglossa</i> | <i>Euglossa championi</i> |
| PLCOL62920 | <i>Euglossa</i> | <i>Euglossa championi</i> |
| PLCOL63520 | <i>Euglossa</i> | <i>Euglossa championi</i> |
| PLCOL64020 | <i>Euglossa</i> | <i>Euglossa championi</i> |
| PLCOL65420 | <i>Euglossa</i> | <i>Euglossa championi</i> |
| DRBEE10807 | <i>Euglossa</i> | <i>Euglossa chlorina</i>  |
| DRBEE16507 | <i>Euglossa</i> | <i>Euglossa chlorina</i>  |
| GBAH160906 | <i>Euglossa</i> | <i>Euglossa chlorina</i>  |
| GBAH629509 | <i>Euglossa</i> | <i>Euglossa chlorina</i>  |
| DRBEE03107 | <i>Euglossa</i> | <i>Euglossa cognata</i>   |
| DRBEE18507 | <i>Euglossa</i> | <i>Euglossa cognata</i>   |
| GBAH631009 | <i>Euglossa</i> | <i>Euglossa cognata</i>   |

|            |                 |                                |
|------------|-----------------|--------------------------------|
| OBP04905   | <i>Euglossa</i> | <i>Euglossa cognata</i>        |
| OBP05005   | <i>Euglossa</i> | <i>Euglossa cognata</i>        |
| OBP05305   | <i>Euglossa</i> | <i>Euglossa cognata</i>        |
| DRBEE02107 | <i>Euglossa</i> | <i>Euglossa cordata</i>        |
| DRBEE05007 | <i>Euglossa</i> | <i>Euglossa cordata</i>        |
| GBAH161006 | <i>Euglossa</i> | <i>Euglossa cordata</i>        |
| GBAH627009 | <i>Euglossa</i> | <i>Euglossa cordata</i>        |
| GBAH635109 | <i>Euglossa</i> | <i>Euglossa cordata</i>        |
| GBAH632609 | <i>Euglossa</i> | <i>Euglossa crassipunctata</i> |
| DRBEE10307 | <i>Euglossa</i> | <i>Euglossa crininota</i>      |
| GBAH626609 | <i>Euglossa</i> | <i>Euglossa crininota</i>      |
| DRBEE02207 | <i>Euglossa</i> | <i>Euglossa cyanaspis</i>      |
| DRBEE07207 | <i>Euglossa</i> | <i>Euglossa cyanura</i>        |
| GBAH633909 | <i>Euglossa</i> | <i>Euglossa cyanura</i>        |
| ASINH20912 | <i>Euglossa</i> | <i>Euglossa cybelia</i>        |
| ASINH21012 | <i>Euglossa</i> | <i>Euglossa cybelia</i>        |
| ASINH21112 | <i>Euglossa</i> | <i>Euglossa cybelia</i>        |
| ASINH21512 | <i>Euglossa</i> | <i>Euglossa cybelia</i>        |
| DRBEE05207 | <i>Euglossa</i> | <i>Euglossa cybelia</i>        |
| GBAH630609 | <i>Euglossa</i> | <i>Euglossa cybelia</i>        |
| PLCOL60720 | <i>Euglossa</i> | <i>Euglossa cybelia</i>        |
| PLCOL60820 | <i>Euglossa</i> | <i>Euglossa cybelia</i>        |
| PLCOL60920 | <i>Euglossa</i> | <i>Euglossa cybelia</i>        |
| PLCOL61020 | <i>Euglossa</i> | <i>Euglossa cybelia</i>        |
| PLCOL61120 | <i>Euglossa</i> | <i>Euglossa cybelia</i>        |
| PLCOL61220 | <i>Euglossa</i> | <i>Euglossa cybelia</i>        |
| PLCOL61320 | <i>Euglossa</i> | <i>Euglossa cybelia</i>        |
| PLCOL61420 | <i>Euglossa</i> | <i>Euglossa cybelia</i>        |
| PLCOL62320 | <i>Euglossa</i> | <i>Euglossa cybelia</i>        |
| PLCOL63120 | <i>Euglossa</i> | <i>Euglossa cybelia</i>        |
| PLCOL63220 | <i>Euglossa</i> | <i>Euglossa cybelia</i>        |
| PLCOL63320 | <i>Euglossa</i> | <i>Euglossa cybelia</i>        |
| PLCOL63420 | <i>Euglossa</i> | <i>Euglossa cybelia</i>        |
| PLCOL64120 | <i>Euglossa</i> | <i>Euglossa cybelia</i>        |
| PLCOL64220 | <i>Euglossa</i> | <i>Euglossa cybelia</i>        |
| PLCOL65020 | <i>Euglossa</i> | <i>Euglossa cybelia</i>        |
| PLCOL65120 | <i>Euglossa</i> | <i>Euglossa cybelia</i>        |
| PLCOL65220 | <i>Euglossa</i> | <i>Euglossa cybelia</i>        |
| GBAH627409 | <i>Euglossa</i> | <i>Euglossa deceptrix</i>      |
| GBAH161106 | <i>Euglossa</i> | <i>Euglossa decorata</i>       |
| GBAH631509 | <i>Euglossa</i> | <i>Euglossa decorata</i>       |
| GBAH631609 | <i>Euglossa</i> | <i>Euglossa decorata</i>       |
| DRBEE07907 | <i>Euglossa</i> | <i>Euglossa despecta</i>       |
| EMS06519   | <i>Euglossa</i> | <i>Euglossa despecta</i>       |
| EMS07819   | <i>Euglossa</i> | <i>Euglossa despecta</i>       |
| EMS08419   | <i>Euglossa</i> | <i>Euglossa despecta</i>       |

|            |                 |                               |
|------------|-----------------|-------------------------------|
| EMS08719   | <i>Euglossa</i> | <i>Euglossa despecta</i>      |
| EMS09119   | <i>Euglossa</i> | <i>Euglossa despecta</i>      |
| GBAH625209 | <i>Euglossa</i> | <i>Euglossa despecta</i>      |
| OBP03205   | <i>Euglossa</i> | <i>Euglossa despecta</i>      |
| OBP03705   | <i>Euglossa</i> | <i>Euglossa despecta</i>      |
| GBAH629009 | <i>Euglossa</i> | <i>Euglossa dissimula</i>     |
| OBP03805   | <i>Euglossa</i> | <i>Euglossa dissimula</i>     |
| OBP03905   | <i>Euglossa</i> | <i>Euglossa dissimula</i>     |
| OBP04005   | <i>Euglossa</i> | <i>Euglossa dissimula</i>     |
| OBP04105   | <i>Euglossa</i> | <i>Euglossa dissimula</i>     |
| OBP04205   | <i>Euglossa</i> | <i>Euglossa dissimula</i>     |
| OBP04305   | <i>Euglossa</i> | <i>Euglossa dissimula</i>     |
| ASINH22612 | <i>Euglossa</i> | <i>Euglossa dodsoni</i>       |
| ASINH22712 | <i>Euglossa</i> | <i>Euglossa dodsoni</i>       |
| ASINH22812 | <i>Euglossa</i> | <i>Euglossa dodsoni</i>       |
| ASINH22912 | <i>Euglossa</i> | <i>Euglossa dodsoni</i>       |
| ASINH23412 | <i>Euglossa</i> | <i>Euglossa dodsoni</i>       |
| ASINH23512 | <i>Euglossa</i> | <i>Euglossa dodsoni</i>       |
| ASINH23612 | <i>Euglossa</i> | <i>Euglossa dodsoni</i>       |
| DRBEE05507 | <i>Euglossa</i> | <i>Euglossa dodsoni</i>       |
| EMS06719   | <i>Euglossa</i> | <i>Euglossa dodsoni</i>       |
| EMS07619   | <i>Euglossa</i> | <i>Euglossa dodsoni</i>       |
| EMS09219   | <i>Euglossa</i> | <i>Euglossa dodsoni</i>       |
| EMS09419   | <i>Euglossa</i> | <i>Euglossa dodsoni</i>       |
| GBAH633609 | <i>Euglossa</i> | <i>Euglossa dodsoni</i>       |
| PLCOL62420 | <i>Euglossa</i> | <i>Euglossa dodsoni</i>       |
| GBAH626909 | <i>Euglossa</i> | <i>Euglossa dressleri</i>     |
| PLCOL57420 | <i>Euglossa</i> | <i>Euglossa dressleri</i>     |
| PLCOL63620 | <i>Euglossa</i> | <i>Euglossa dressleri</i>     |
| PLCOL63720 | <i>Euglossa</i> | <i>Euglossa dressleri</i>     |
| PLCOL63820 | <i>Euglossa</i> | <i>Euglossa dressleri</i>     |
| PLCOL63920 | <i>Euglossa</i> | <i>Euglossa dressleri</i>     |
| DRBEE18607 | <i>Euglossa</i> | <i>Euglossa erythrochlora</i> |
| GBAH161206 | <i>Euglossa</i> | <i>Euglossa erythrochlora</i> |
| GBAH627209 | <i>Euglossa</i> | <i>Euglossa erythrochlora</i> |
| ASINH24612 | <i>Euglossa</i> | <i>Euglossa flammea</i>       |
| ASINH24712 | <i>Euglossa</i> | <i>Euglossa flammea</i>       |
| ASINH25112 | <i>Euglossa</i> | <i>Euglossa flammea</i>       |
| ASINH25212 | <i>Euglossa</i> | <i>Euglossa flammea</i>       |
| DRBEE17407 | <i>Euglossa</i> | <i>Euglossa flammea</i>       |
| GBAH633109 | <i>Euglossa</i> | <i>Euglossa flammea</i>       |
| GBAH633809 | <i>Euglossa</i> | <i>Euglossa flammea</i>       |
| PLCOL31420 | <i>Euglossa</i> | <i>Euglossa flammea</i>       |
| PLCOL33020 | <i>Euglossa</i> | <i>Euglossa flammea</i>       |
| PLCOL39120 | <i>Euglossa</i> | <i>Euglossa flammea</i>       |
| PLCOL48420 | <i>Euglossa</i> | <i>Euglossa flammea</i>       |

|            |                 |                              |
|------------|-----------------|------------------------------|
| PLCOL48520 | <i>Euglossa</i> | <i>Euglossa flammea</i>      |
| PLCOL48620 | <i>Euglossa</i> | <i>Euglossa flammea</i>      |
| PLCOL48720 | <i>Euglossa</i> | <i>Euglossa flammea</i>      |
| PLCOL49820 | <i>Euglossa</i> | <i>Euglossa flammea</i>      |
| PLCOL49920 | <i>Euglossa</i> | <i>Euglossa flammea</i>      |
| PLCOL50020 | <i>Euglossa</i> | <i>Euglossa flammea</i>      |
| PLCOL50520 | <i>Euglossa</i> | <i>Euglossa flammea</i>      |
| PLCOL51220 | <i>Euglossa</i> | <i>Euglossa flammea</i>      |
| DRBEE11007 | <i>Euglossa</i> | <i>Euglossa fuscifrons</i>   |
| GBAH628809 | <i>Euglossa</i> | <i>Euglossa fuscifrons</i>   |
| DRBEE10507 | <i>Euglossa</i> | <i>Euglossa gaianii</i>      |
| DRBEE11707 | <i>Euglossa</i> | <i>Euglossa gaianii</i>      |
| DRBEE12007 | <i>Euglossa</i> | <i>Euglossa gaianii</i>      |
| DRBEE12307 | <i>Euglossa</i> | <i>Euglossa gaianii</i>      |
| DRBEE11907 | <i>Euglossa</i> | <i>Euglossa glanntupperi</i> |
| ASINH25312 | <i>Euglossa</i> | <i>Euglossa gorgonensis</i>  |
| ASINH25412 | <i>Euglossa</i> | <i>Euglossa gorgonensis</i>  |
| ASINH25712 | <i>Euglossa</i> | <i>Euglossa gorgonensis</i>  |
| ASINH25812 | <i>Euglossa</i> | <i>Euglossa gorgonensis</i>  |
| ASINH26012 | <i>Euglossa</i> | <i>Euglossa gorgonensis</i>  |
| ASINH26112 | <i>Euglossa</i> | <i>Euglossa gorgonensis</i>  |
| ASINH26512 | <i>Euglossa</i> | <i>Euglossa gorgonensis</i>  |
| ASINH26612 | <i>Euglossa</i> | <i>Euglossa gorgonensis</i>  |
| ASINH26712 | <i>Euglossa</i> | <i>Euglossa gorgonensis</i>  |
| GBAH161306 | <i>Euglossa</i> | <i>Euglossa gorgonensis</i>  |
| GBAH626709 | <i>Euglossa</i> | <i>Euglossa gorgonensis</i>  |
| GMACT07215 | <i>Euglossa</i> | <i>Euglossa gorgonensis</i>  |
| PLCOL66020 | <i>Euglossa</i> | <i>Euglossa gorgonensis</i>  |
| PLCOL66120 | <i>Euglossa</i> | <i>Euglossa gorgonensis</i>  |
| ASINH26812 | <i>Euglossa</i> | <i>Euglossa hansonii</i>     |
| ASINH27612 | <i>Euglossa</i> | <i>Euglossa hansonii</i>     |
| GBAH632209 | <i>Euglossa</i> | <i>Euglossa hansonii</i>     |
| PLCOL57120 | <i>Euglossa</i> | <i>Euglossa hansonii</i>     |
| PLCOL57220 | <i>Euglossa</i> | <i>Euglossa hansonii</i>     |
| PLCOL57320 | <i>Euglossa</i> | <i>Euglossa hansonii</i>     |
| PLCOL58020 | <i>Euglossa</i> | <i>Euglossa hansonii</i>     |
| PLCOL58120 | <i>Euglossa</i> | <i>Euglossa hansonii</i>     |
| PLCOL63020 | <i>Euglossa</i> | <i>Euglossa hansonii</i>     |
| DRBEE11807 | <i>Euglossa</i> | <i>Euglossa hemichlora</i>   |
| EMS08619   | <i>Euglossa</i> | <i>Euglossa hemichlora</i>   |
| GBAH161406 | <i>Euglossa</i> | <i>Euglossa hemichlora</i>   |
| GBAH625909 | <i>Euglossa</i> | <i>Euglossa hemichlora</i>   |
| ASINH29312 | <i>Euglossa</i> | <i>Euglossa heterosticta</i> |
| ASINH30012 | <i>Euglossa</i> | <i>Euglossa heterosticta</i> |
| ASINH30112 | <i>Euglossa</i> | <i>Euglossa heterosticta</i> |
| DRBEE08007 | <i>Euglossa</i> | <i>Euglossa heterosticta</i> |

|            |                 |                              |
|------------|-----------------|------------------------------|
| GBAH632009 | <i>Euglossa</i> | <i>Euglossa heterosticta</i> |
| ASINH30212 | <i>Euglossa</i> | <i>Euglossa hyacinthina</i>  |
| ASINH30312 | <i>Euglossa</i> | <i>Euglossa hyacinthina</i>  |
| ASINH30412 | <i>Euglossa</i> | <i>Euglossa hyacinthina</i>  |
| ASINH30512 | <i>Euglossa</i> | <i>Euglossa hyacinthina</i>  |
| ASINH30612 | <i>Euglossa</i> | <i>Euglossa hyacinthina</i>  |
| ASINH30712 | <i>Euglossa</i> | <i>Euglossa hyacinthina</i>  |
| ASINH30812 | <i>Euglossa</i> | <i>Euglossa hyacinthina</i>  |
| ASINH30912 | <i>Euglossa</i> | <i>Euglossa hyacinthina</i>  |
| ASINH28012 | <i>Euglossa</i> | <i>Euglossa ignita</i>       |
| ASINH28412 | <i>Euglossa</i> | <i>Euglossa ignita</i>       |
| ASINH28512 | <i>Euglossa</i> | <i>Euglossa ignita</i>       |
| ASINH28612 | <i>Euglossa</i> | <i>Euglossa ignita</i>       |
| ASINH28712 | <i>Euglossa</i> | <i>Euglossa ignita</i>       |
| ASINH28812 | <i>Euglossa</i> | <i>Euglossa ignita</i>       |
| DRBEE04607 | <i>Euglossa</i> | <i>Euglossa ignita</i>       |
| DRBEE04707 | <i>Euglossa</i> | <i>Euglossa ignita</i>       |
| DRBEE18007 | <i>Euglossa</i> | <i>Euglossa ignita</i>       |
| GBAH633009 | <i>Euglossa</i> | <i>Euglossa ignita</i>       |
| PLCOL29220 | <i>Euglossa</i> | <i>Euglossa ignita</i>       |
| PLCOL29320 | <i>Euglossa</i> | <i>Euglossa ignita</i>       |
| PLCOL29420 | <i>Euglossa</i> | <i>Euglossa ignita</i>       |
| PLCOL29520 | <i>Euglossa</i> | <i>Euglossa ignita</i>       |
| PLCOL29620 | <i>Euglossa</i> | <i>Euglossa ignita</i>       |
| PLCOL29720 | <i>Euglossa</i> | <i>Euglossa ignita</i>       |
| PLCOL30320 | <i>Euglossa</i> | <i>Euglossa ignita</i>       |
| PLCOL30420 | <i>Euglossa</i> | <i>Euglossa ignita</i>       |
| PLCOL30520 | <i>Euglossa</i> | <i>Euglossa ignita</i>       |
| PLCOL30620 | <i>Euglossa</i> | <i>Euglossa ignita</i>       |
| PLCOL30720 | <i>Euglossa</i> | <i>Euglossa ignita</i>       |
| PLCOL30820 | <i>Euglossa</i> | <i>Euglossa ignita</i>       |
| PLCOL30920 | <i>Euglossa</i> | <i>Euglossa ignita</i>       |
| PLCOL31020 | <i>Euglossa</i> | <i>Euglossa ignita</i>       |
| PLCOL31120 | <i>Euglossa</i> | <i>Euglossa ignita</i>       |
| PLCOL31220 | <i>Euglossa</i> | <i>Euglossa ignita</i>       |
| PLCOL31320 | <i>Euglossa</i> | <i>Euglossa ignita</i>       |
| PLCOL32520 | <i>Euglossa</i> | <i>Euglossa ignita</i>       |
| PLCOL32620 | <i>Euglossa</i> | <i>Euglossa ignita</i>       |
| PLCOL32720 | <i>Euglossa</i> | <i>Euglossa ignita</i>       |
| PLCOL32820 | <i>Euglossa</i> | <i>Euglossa ignita</i>       |
| PLCOL32920 | <i>Euglossa</i> | <i>Euglossa ignita</i>       |
| PLCOL33120 | <i>Euglossa</i> | <i>Euglossa ignita</i>       |
| PLCOL33420 | <i>Euglossa</i> | <i>Euglossa ignita</i>       |
| PLCOL33520 | <i>Euglossa</i> | <i>Euglossa ignita</i>       |
| PLCOL34520 | <i>Euglossa</i> | <i>Euglossa ignita</i>       |
| PLCOL35920 | <i>Euglossa</i> | <i>Euglossa ignita</i>       |



|            |                 |                             |
|------------|-----------------|-----------------------------|
| PLCOL38120 | <i>Euglossa</i> | <i>Euglossa ignita</i>      |
| PLCOL38220 | <i>Euglossa</i> | <i>Euglossa ignita</i>      |
| PLCOL38320 | <i>Euglossa</i> | <i>Euglossa ignita</i>      |
| PLCOL38420 | <i>Euglossa</i> | <i>Euglossa ignita</i>      |
| PLCOL38520 | <i>Euglossa</i> | <i>Euglossa ignita</i>      |
| PLCOL38620 | <i>Euglossa</i> | <i>Euglossa ignita</i>      |
| PLCOL38720 | <i>Euglossa</i> | <i>Euglossa ignita</i>      |
| PLCOL38820 | <i>Euglossa</i> | <i>Euglossa ignita</i>      |
| PLCOL39320 | <i>Euglossa</i> | <i>Euglossa ignita</i>      |
| PLCOL39420 | <i>Euglossa</i> | <i>Euglossa ignita</i>      |
| PLCOL39520 | <i>Euglossa</i> | <i>Euglossa ignita</i>      |
| PLCOL40120 | <i>Euglossa</i> | <i>Euglossa ignita</i>      |
| PLCOL40220 | <i>Euglossa</i> | <i>Euglossa ignita</i>      |
| DRBEE04007 | <i>Euglossa</i> | <i>Euglossa igniventris</i> |
| GBAH628609 | <i>Euglossa</i> | <i>Euglossa igniventris</i> |
| GBAH632809 | <i>Euglossa</i> | <i>Euglossa igniventris</i> |
| PLCOL59320 | <i>Euglossa</i> | <i>Euglossa igniventris</i> |
| PLCOL59420 | <i>Euglossa</i> | <i>Euglossa igniventris</i> |
| ASINH31312 | <i>Euglossa</i> | <i>Euglossa imperialis</i>  |
| ASINH31712 | <i>Euglossa</i> | <i>Euglossa imperialis</i>  |
| ASINH31812 | <i>Euglossa</i> | <i>Euglossa imperialis</i>  |
| ASINH32012 | <i>Euglossa</i> | <i>Euglossa imperialis</i>  |
| ASINH32112 | <i>Euglossa</i> | <i>Euglossa imperialis</i>  |
| ASINH32212 | <i>Euglossa</i> | <i>Euglossa imperialis</i>  |
| DRBEE02307 | <i>Euglossa</i> | <i>Euglossa imperialis</i>  |
| DRBEE02407 | <i>Euglossa</i> | <i>Euglossa imperialis</i>  |
| DRBEE02507 | <i>Euglossa</i> | <i>Euglossa imperialis</i>  |
| DRBEE17907 | <i>Euglossa</i> | <i>Euglossa imperialis</i>  |
| GBAH056106 | <i>Euglossa</i> | <i>Euglossa imperialis</i>  |
| GBAH628309 | <i>Euglossa</i> | <i>Euglossa imperialis</i>  |
| OBP05405   | <i>Euglossa</i> | <i>Euglossa imperialis</i>  |
| OBP05505   | <i>Euglossa</i> | <i>Euglossa imperialis</i>  |
| OBP05605   | <i>Euglossa</i> | <i>Euglossa imperialis</i>  |
| OBP05705   | <i>Euglossa</i> | <i>Euglossa imperialis</i>  |
| OBP05805   | <i>Euglossa</i> | <i>Euglossa imperialis</i>  |
| OBP05905   | <i>Euglossa</i> | <i>Euglossa imperialis</i>  |
| PLCOL28620 | <i>Euglossa</i> | <i>Euglossa imperialis</i>  |
| PLCOL28720 | <i>Euglossa</i> | <i>Euglossa imperialis</i>  |
| PLCOL28820 | <i>Euglossa</i> | <i>Euglossa imperialis</i>  |
| PLCOL28920 | <i>Euglossa</i> | <i>Euglossa imperialis</i>  |
| PLCOL29020 | <i>Euglossa</i> | <i>Euglossa imperialis</i>  |
| PLCOL29120 | <i>Euglossa</i> | <i>Euglossa imperialis</i>  |
| PLCOL29820 | <i>Euglossa</i> | <i>Euglossa imperialis</i>  |
| PLCOL29920 | <i>Euglossa</i> | <i>Euglossa imperialis</i>  |
| PLCOL30020 | <i>Euglossa</i> | <i>Euglossa imperialis</i>  |
| PLCOL30120 | <i>Euglossa</i> | <i>Euglossa imperialis</i>  |

|            |                 |                            |
|------------|-----------------|----------------------------|
| PLCOL30220 | <i>Euglossa</i> | <i>Euglossa imperialis</i> |
| PLCOL31720 | <i>Euglossa</i> | <i>Euglossa imperialis</i> |
| PLCOL31820 | <i>Euglossa</i> | <i>Euglossa imperialis</i> |
| PLCOL31920 | <i>Euglossa</i> | <i>Euglossa imperialis</i> |
| PLCOL32320 | <i>Euglossa</i> | <i>Euglossa imperialis</i> |
| PLCOL32420 | <i>Euglossa</i> | <i>Euglossa imperialis</i> |
| PLCOL33620 | <i>Euglossa</i> | <i>Euglossa imperialis</i> |
| PLCOL33720 | <i>Euglossa</i> | <i>Euglossa imperialis</i> |
| PLCOL33820 | <i>Euglossa</i> | <i>Euglossa imperialis</i> |
| PLCOL33920 | <i>Euglossa</i> | <i>Euglossa imperialis</i> |
| PLCOL34020 | <i>Euglossa</i> | <i>Euglossa imperialis</i> |
| PLCOL34220 | <i>Euglossa</i> | <i>Euglossa imperialis</i> |
| PLCOL34320 | <i>Euglossa</i> | <i>Euglossa imperialis</i> |
| PLCOL34420 | <i>Euglossa</i> | <i>Euglossa imperialis</i> |
| PLCOL36720 | <i>Euglossa</i> | <i>Euglossa imperialis</i> |
| PLCOL36820 | <i>Euglossa</i> | <i>Euglossa imperialis</i> |
| PLCOL36920 | <i>Euglossa</i> | <i>Euglossa imperialis</i> |
| PLCOL37320 | <i>Euglossa</i> | <i>Euglossa imperialis</i> |
| PLCOL37420 | <i>Euglossa</i> | <i>Euglossa imperialis</i> |
| PLCOL37520 | <i>Euglossa</i> | <i>Euglossa imperialis</i> |
| PLCOL37620 | <i>Euglossa</i> | <i>Euglossa imperialis</i> |
| PLCOL37720 | <i>Euglossa</i> | <i>Euglossa imperialis</i> |
| PLCOL38920 | <i>Euglossa</i> | <i>Euglossa imperialis</i> |
| PLCOL39020 | <i>Euglossa</i> | <i>Euglossa imperialis</i> |
| PLCOL39620 | <i>Euglossa</i> | <i>Euglossa imperialis</i> |
| PLCOL39720 | <i>Euglossa</i> | <i>Euglossa imperialis</i> |
| PLCOL39820 | <i>Euglossa</i> | <i>Euglossa imperialis</i> |
| PLCOL40320 | <i>Euglossa</i> | <i>Euglossa imperialis</i> |
| PLCOL40420 | <i>Euglossa</i> | <i>Euglossa imperialis</i> |
| PLCOL41320 | <i>Euglossa</i> | <i>Euglossa imperialis</i> |
| PLCOL41420 | <i>Euglossa</i> | <i>Euglossa imperialis</i> |
| PLCOL41520 | <i>Euglossa</i> | <i>Euglossa imperialis</i> |
| PLCOL41620 | <i>Euglossa</i> | <i>Euglossa imperialis</i> |
| PLCOL41720 | <i>Euglossa</i> | <i>Euglossa imperialis</i> |
| PLCOL41820 | <i>Euglossa</i> | <i>Euglossa imperialis</i> |
| PLCOL43020 | <i>Euglossa</i> | <i>Euglossa imperialis</i> |
| PLCOL45220 | <i>Euglossa</i> | <i>Euglossa imperialis</i> |
| PLCOL45320 | <i>Euglossa</i> | <i>Euglossa imperialis</i> |
| PLCOL45420 | <i>Euglossa</i> | <i>Euglossa imperialis</i> |
| PLCOL45520 | <i>Euglossa</i> | <i>Euglossa imperialis</i> |
| PLCOL45620 | <i>Euglossa</i> | <i>Euglossa imperialis</i> |
| PLCOL45720 | <i>Euglossa</i> | <i>Euglossa imperialis</i> |
| PLCOL45820 | <i>Euglossa</i> | <i>Euglossa imperialis</i> |
| PLCOL45920 | <i>Euglossa</i> | <i>Euglossa imperialis</i> |
| PLCOL46020 | <i>Euglossa</i> | <i>Euglossa imperialis</i> |
| PLCOL49120 | <i>Euglossa</i> | <i>Euglossa imperialis</i> |

|             |                 |                            |
|-------------|-----------------|----------------------------|
| PLCOL49220  | <i>Euglossa</i> | <i>Euglossa imperialis</i> |
| PLCOL50720  | <i>Euglossa</i> | <i>Euglossa imperialis</i> |
| PLCOL50820  | <i>Euglossa</i> | <i>Euglossa imperialis</i> |
| PLCOL50920  | <i>Euglossa</i> | <i>Euglossa imperialis</i> |
| PLCOL51020  | <i>Euglossa</i> | <i>Euglossa imperialis</i> |
| PLCOL51120  | <i>Euglossa</i> | <i>Euglossa imperialis</i> |
| PLCOL51820  | <i>Euglossa</i> | <i>Euglossa imperialis</i> |
| PLCOL51920  | <i>Euglossa</i> | <i>Euglossa imperialis</i> |
| PLCOL52020  | <i>Euglossa</i> | <i>Euglossa imperialis</i> |
| PLCOL52120  | <i>Euglossa</i> | <i>Euglossa imperialis</i> |
| PLCOL54020  | <i>Euglossa</i> | <i>Euglossa imperialis</i> |
| PLCOL54120  | <i>Euglossa</i> | <i>Euglossa imperialis</i> |
| PLCOL54220  | <i>Euglossa</i> | <i>Euglossa imperialis</i> |
| PLCOL54320  | <i>Euglossa</i> | <i>Euglossa imperialis</i> |
| GBAH634809  | <i>Euglossa</i> | <i>Euglossa inflata</i>    |
| DRBEE13907  | <i>Euglossa</i> | <i>Euglossa intersecta</i> |
| GBAH056206  | <i>Euglossa</i> | <i>Euglossa intersecta</i> |
| GBAH056306  | <i>Euglossa</i> | <i>Euglossa intersecta</i> |
| GBAH631709  | <i>Euglossa</i> | <i>Euglossa intersecta</i> |
| GBAH1113715 | <i>Euglossa</i> | <i>Euglossa iopoecila</i>  |
| GBAH1113815 | <i>Euglossa</i> | <i>Euglossa iopoecila</i>  |
| GBAH1113915 | <i>Euglossa</i> | <i>Euglossa iopoecila</i>  |
| GBAH1114015 | <i>Euglossa</i> | <i>Euglossa iopoecila</i>  |
| GBAH1114115 | <i>Euglossa</i> | <i>Euglossa iopoecila</i>  |
| GBAH1114215 | <i>Euglossa</i> | <i>Euglossa iopoecila</i>  |
| GBAH1114315 | <i>Euglossa</i> | <i>Euglossa iopoecila</i>  |
| GBAH1114415 | <i>Euglossa</i> | <i>Euglossa iopoecila</i>  |
| GBAH1114515 | <i>Euglossa</i> | <i>Euglossa iopoecila</i>  |
| GBAH1665419 | <i>Euglossa</i> | <i>Euglossa iopoecila</i>  |
| GBAH1665519 | <i>Euglossa</i> | <i>Euglossa iopoecila</i>  |
| GBAH1665619 | <i>Euglossa</i> | <i>Euglossa iopoecila</i>  |
| GBAH1665719 | <i>Euglossa</i> | <i>Euglossa iopoecila</i>  |
| GBAH1665819 | <i>Euglossa</i> | <i>Euglossa iopoecila</i>  |
| GBAH1665919 | <i>Euglossa</i> | <i>Euglossa iopoecila</i>  |
| GBAH1666019 | <i>Euglossa</i> | <i>Euglossa iopoecila</i>  |
| GBAH1666119 | <i>Euglossa</i> | <i>Euglossa iopoecila</i>  |
| GBAH1666219 | <i>Euglossa</i> | <i>Euglossa iopoecila</i>  |
| GBAH1666319 | <i>Euglossa</i> | <i>Euglossa iopoecila</i>  |
| GBAH1666419 | <i>Euglossa</i> | <i>Euglossa iopoecila</i>  |
| GBAH1666519 | <i>Euglossa</i> | <i>Euglossa iopoecila</i>  |
| GBAH1666619 | <i>Euglossa</i> | <i>Euglossa iopoecila</i>  |
| GBAH1666719 | <i>Euglossa</i> | <i>Euglossa iopoecila</i>  |
| GBAH1666819 | <i>Euglossa</i> | <i>Euglossa iopoecila</i>  |
| GBAH1666919 | <i>Euglossa</i> | <i>Euglossa iopoecila</i>  |
| GBAH1667019 | <i>Euglossa</i> | <i>Euglossa iopoecila</i>  |
| GBAH1667119 | <i>Euglossa</i> | <i>Euglossa iopoecila</i>  |

|              |                 |                           |
|--------------|-----------------|---------------------------|
| GBAH1667219  | <i>Euglossa</i> | <i>Euglossa iopoecila</i> |
| GBAH1667319  | <i>Euglossa</i> | <i>Euglossa iopoecila</i> |
| GBAH1667419  | <i>Euglossa</i> | <i>Euglossa iopoecila</i> |
| GBAH1667519  | <i>Euglossa</i> | <i>Euglossa iopoecila</i> |
| GBAH1667619  | <i>Euglossa</i> | <i>Euglossa iopoecila</i> |
| GBAH1667719  | <i>Euglossa</i> | <i>Euglossa iopoecila</i> |
| GBAH1667819  | <i>Euglossa</i> | <i>Euglossa iopoecila</i> |
| GBAH1667919  | <i>Euglossa</i> | <i>Euglossa iopoecila</i> |
| GBAH1668019  | <i>Euglossa</i> | <i>Euglossa iopoecila</i> |
| GBAH1668119  | <i>Euglossa</i> | <i>Euglossa iopoecila</i> |
| GBAH1668219  | <i>Euglossa</i> | <i>Euglossa iopoecila</i> |
| GBAH1668319  | <i>Euglossa</i> | <i>Euglossa iopoecila</i> |
| GBAH1668419  | <i>Euglossa</i> | <i>Euglossa iopoecila</i> |
| GBAH1668519  | <i>Euglossa</i> | <i>Euglossa iopoecila</i> |
| GBAH1668619  | <i>Euglossa</i> | <i>Euglossa iopoecila</i> |
| GBAH1668719  | <i>Euglossa</i> | <i>Euglossa iopoecila</i> |
| GBMIN7283017 | <i>Euglossa</i> | <i>Euglossa iopoecila</i> |
| GBMIN7283117 | <i>Euglossa</i> | <i>Euglossa iopoecila</i> |
| GBMIN7283217 | <i>Euglossa</i> | <i>Euglossa iopoecila</i> |
| GBMIN7283317 | <i>Euglossa</i> | <i>Euglossa iopoecila</i> |
| GBMIN7283417 | <i>Euglossa</i> | <i>Euglossa iopoecila</i> |
| GBMIN7283517 | <i>Euglossa</i> | <i>Euglossa iopoecila</i> |
| GBMIN7283617 | <i>Euglossa</i> | <i>Euglossa iopoecila</i> |
| GBMIN7283717 | <i>Euglossa</i> | <i>Euglossa iopoecila</i> |
| GBMIN7283817 | <i>Euglossa</i> | <i>Euglossa iopoecila</i> |
| GBMIN7283917 | <i>Euglossa</i> | <i>Euglossa iopoecila</i> |
| GBMIN7284017 | <i>Euglossa</i> | <i>Euglossa iopoecila</i> |
| GBMIN7284117 | <i>Euglossa</i> | <i>Euglossa iopoecila</i> |
| GBMIN7284217 | <i>Euglossa</i> | <i>Euglossa iopoecila</i> |
| GBMIN7284317 | <i>Euglossa</i> | <i>Euglossa iopoecila</i> |
| GBMIN7284417 | <i>Euglossa</i> | <i>Euglossa iopoecila</i> |
| GBMIN7284517 | <i>Euglossa</i> | <i>Euglossa iopoecila</i> |
| GBMIN7284617 | <i>Euglossa</i> | <i>Euglossa iopoecila</i> |
| GBMIN7284717 | <i>Euglossa</i> | <i>Euglossa iopoecila</i> |
| GBMIN7284817 | <i>Euglossa</i> | <i>Euglossa iopoecila</i> |
| GBMIN7284917 | <i>Euglossa</i> | <i>Euglossa iopoecila</i> |
| GBMIN7285017 | <i>Euglossa</i> | <i>Euglossa iopoecila</i> |
| GBMIN7285117 | <i>Euglossa</i> | <i>Euglossa iopoecila</i> |
| GBMIN7285217 | <i>Euglossa</i> | <i>Euglossa iopoecila</i> |
| GBMIN7285317 | <i>Euglossa</i> | <i>Euglossa iopoecila</i> |
| GBMIN7285417 | <i>Euglossa</i> | <i>Euglossa iopoecila</i> |
| GBMIN7285517 | <i>Euglossa</i> | <i>Euglossa iopoecila</i> |
| GBMIN7285617 | <i>Euglossa</i> | <i>Euglossa iopoecila</i> |
| GBMIN7285717 | <i>Euglossa</i> | <i>Euglossa iopoecila</i> |
| GBMIN7285817 | <i>Euglossa</i> | <i>Euglossa iopoecila</i> |
| GBMIN7285917 | <i>Euglossa</i> | <i>Euglossa iopoecila</i> |



|              |                 |                              |
|--------------|-----------------|------------------------------|
| GBMIN7290617 | <i>Euglossa</i> | <i>Euglossa iopoecila</i>    |
| GBMIN7290717 | <i>Euglossa</i> | <i>Euglossa iopoecila</i>    |
| GBMIN7290817 | <i>Euglossa</i> | <i>Euglossa iopoecila</i>    |
| GBMIN7290917 | <i>Euglossa</i> | <i>Euglossa iopoecila</i>    |
| GBMIN7291017 | <i>Euglossa</i> | <i>Euglossa iopoecila</i>    |
| GBMIN7291117 | <i>Euglossa</i> | <i>Euglossa iopoecila</i>    |
| GBMIN7291217 | <i>Euglossa</i> | <i>Euglossa iopoecila</i>    |
| GBMIN7291317 | <i>Euglossa</i> | <i>Euglossa iopoecila</i>    |
| GBMIN7291417 | <i>Euglossa</i> | <i>Euglossa iopoecila</i>    |
| GBMIN7291517 | <i>Euglossa</i> | <i>Euglossa iopoecila</i>    |
| GBMIN7291617 | <i>Euglossa</i> | <i>Euglossa iopoecila</i>    |
| GBMIN7291717 | <i>Euglossa</i> | <i>Euglossa iopoecila</i>    |
| GBMIN7291817 | <i>Euglossa</i> | <i>Euglossa iopoecila</i>    |
| GBMIN7291917 | <i>Euglossa</i> | <i>Euglossa iopoecila</i>    |
| GBMIN7292017 | <i>Euglossa</i> | <i>Euglossa iopoecila</i>    |
| GBMIN7292117 | <i>Euglossa</i> | <i>Euglossa iopoecila</i>    |
| DRBEE03507   | <i>Euglossa</i> | <i>Euglossa ioprosopa</i>    |
| GBAH629709   | <i>Euglossa</i> | <i>Euglossa ioprosopa</i>    |
| GBAH635009   | <i>Euglossa</i> | <i>Euglossa iopyrrha</i>     |
| GBAH634709   | <i>Euglossa</i> | <i>Euglossa jamaicensis</i>  |
| GBAH629309   | <i>Euglossa</i> | <i>Euglossa laevicincta</i>  |
| GBAH625409   | <i>Euglossa</i> | <i>Euglossa liopoda</i>      |
| GBAH630009   | <i>Euglossa</i> | <i>Euglossa lugubris</i>     |
| GBAH624509   | <i>Euglossa</i> | <i>Euglossa macrorhyncha</i> |
| ASINH32412   | <i>Euglossa</i> | <i>Euglossa maculilabris</i> |
| ASINH32612   | <i>Euglossa</i> | <i>Euglossa maculilabris</i> |
| ASINH32912   | <i>Euglossa</i> | <i>Euglossa maculilabris</i> |
| ASINH33012   | <i>Euglossa</i> | <i>Euglossa maculilabris</i> |
| ASINH33112   | <i>Euglossa</i> | <i>Euglossa maculilabris</i> |
| DRBEE03807   | <i>Euglossa</i> | <i>Euglossa maculilabris</i> |
| GBAH629109   | <i>Euglossa</i> | <i>Euglossa maculilabris</i> |
| PLCOL64320   | <i>Euglossa</i> | <i>Euglossa maculilabris</i> |
| PLCOL64420   | <i>Euglossa</i> | <i>Euglossa maculilabris</i> |
| PLCOL64520   | <i>Euglossa</i> | <i>Euglossa maculilabris</i> |
| PLCOL65320   | <i>Euglossa</i> | <i>Euglossa maculilabris</i> |
| EMS07319     | <i>Euglossa</i> | <i>Euglossa milenae</i>      |
| EMS07419     | <i>Euglossa</i> | <i>Euglossa milenae</i>      |
| DRBEE02707   | <i>Euglossa</i> | <i>Euglossa mixta</i>        |
| DRBEE02807   | <i>Euglossa</i> | <i>Euglossa mixta</i>        |
| EMS08819     | <i>Euglossa</i> | <i>Euglossa mixta</i>        |
| GBAH161506   | <i>Euglossa</i> | <i>Euglossa mixta</i>        |
| GBAH620009   | <i>Euglossa</i> | <i>Euglossa mixta</i>        |
| OBP04505     | <i>Euglossa</i> | <i>Euglossa mixta</i>        |
| OBP04605     | <i>Euglossa</i> | <i>Euglossa mixta</i>        |
| OBP04705     | <i>Euglossa</i> | <i>Euglossa mixta</i>        |
| OBP04805     | <i>Euglossa</i> | <i>Euglossa mixta</i>        |

|            |                 |                              |
|------------|-----------------|------------------------------|
| PLCOL32020 | <i>Euglossa</i> | <i>Euglossa mixta</i>        |
| PLCOL32120 | <i>Euglossa</i> | <i>Euglossa mixta</i>        |
| PLCOL35020 | <i>Euglossa</i> | <i>Euglossa mixta</i>        |
| PLCOL35120 | <i>Euglossa</i> | <i>Euglossa mixta</i>        |
| PLCOL35220 | <i>Euglossa</i> | <i>Euglossa mixta</i>        |
| PLCOL35320 | <i>Euglossa</i> | <i>Euglossa mixta</i>        |
| PLCOL35420 | <i>Euglossa</i> | <i>Euglossa mixta</i>        |
| PLCOL35620 | <i>Euglossa</i> | <i>Euglossa mixta</i>        |
| PLCOL35720 | <i>Euglossa</i> | <i>Euglossa mixta</i>        |
| PLCOL36520 | <i>Euglossa</i> | <i>Euglossa mixta</i>        |
| PLCOL39920 | <i>Euglossa</i> | <i>Euglossa mixta</i>        |
| PLCOL47120 | <i>Euglossa</i> | <i>Euglossa mixta</i>        |
| PLCOL47220 | <i>Euglossa</i> | <i>Euglossa mixta</i>        |
| PLCOL47320 | <i>Euglossa</i> | <i>Euglossa mixta</i>        |
| PLCOL47420 | <i>Euglossa</i> | <i>Euglossa mixta</i>        |
| PLCOL48020 | <i>Euglossa</i> | <i>Euglossa mixta</i>        |
| PLCOL48120 | <i>Euglossa</i> | <i>Euglossa mixta</i>        |
| PLCOL49420 | <i>Euglossa</i> | <i>Euglossa mixta</i>        |
| PLCOL49520 | <i>Euglossa</i> | <i>Euglossa mixta</i>        |
| PLCOL49620 | <i>Euglossa</i> | <i>Euglossa mixta</i>        |
| PLCOL52420 | <i>Euglossa</i> | <i>Euglossa mixta</i>        |
| PLCOL52520 | <i>Euglossa</i> | <i>Euglossa mixta</i>        |
| PLCOL52620 | <i>Euglossa</i> | <i>Euglossa mixta</i>        |
| PLCOL52720 | <i>Euglossa</i> | <i>Euglossa mixta</i>        |
| PLCOL53220 | <i>Euglossa</i> | <i>Euglossa mixta</i>        |
| PLCOL53320 | <i>Euglossa</i> | <i>Euglossa mixta</i>        |
| PLCOL53620 | <i>Euglossa</i> | <i>Euglossa mixta</i>        |
| PLCOL55720 | <i>Euglossa</i> | <i>Euglossa mixta</i>        |
| PLCOL55920 | <i>Euglossa</i> | <i>Euglossa mixta</i>        |
| PLCOL56020 | <i>Euglossa</i> | <i>Euglossa mixta</i>        |
| PLCOL56120 | <i>Euglossa</i> | <i>Euglossa mixta</i>        |
| PLCOL61520 | <i>Euglossa</i> | <i>Euglossa mixta</i>        |
| PLCOL61620 | <i>Euglossa</i> | <i>Euglossa mixta</i>        |
| DRBEE10607 | <i>Euglossa</i> | <i>Euglossa modestior</i>    |
| DRBEE08907 | <i>Euglossa</i> | <i>Euglossa mourei</i>       |
| PLCOL36020 | <i>Euglossa</i> | <i>Euglossa natesi</i>       |
| PLCOL60320 | <i>Euglossa</i> | <i>Euglossa nigropilosa</i>  |
| PLCOL60420 | <i>Euglossa</i> | <i>Euglossa nigropilosa</i>  |
| PLCOL60520 | <i>Euglossa</i> | <i>Euglossa nigropilosa</i>  |
| DRBEE10207 | <i>Euglossa</i> | <i>Euglossa obtusa</i>       |
| GBAH626109 | <i>Euglossa</i> | <i>Euglossa obtusa</i>       |
| GBAH635309 | <i>Euglossa</i> | <i>Euglossa occidentalis</i> |
| ASINH34112 | <i>Euglossa</i> | <i>Euglossa oleolucens</i>   |
| ASINH34212 | <i>Euglossa</i> | <i>Euglossa oleolucens</i>   |
| ASINH34312 | <i>Euglossa</i> | <i>Euglossa oleolucens</i>   |
| ASINH34612 | <i>Euglossa</i> | <i>Euglossa oleolucens</i>   |

|            |                 |                                 |
|------------|-----------------|---------------------------------|
| ASINH34712 | <i>Euglossa</i> | <i>Euglossa oleolucens</i>      |
| ASINH34812 | <i>Euglossa</i> | <i>Euglossa oleolucens</i>      |
| ASINH34912 | <i>Euglossa</i> | <i>Euglossa oleolucens</i>      |
| DRBEE12107 | <i>Euglossa</i> | <i>Euglossa oleolucens</i>      |
| DRBEE12407 | <i>Euglossa</i> | <i>Euglossa oleolucens</i>      |
| DRBEE17507 | <i>Euglossa</i> | <i>Euglossa orellana</i>        |
| DRBEE18207 | <i>Euglossa</i> | <i>Euglossa orellana</i>        |
| DRBEE18307 | <i>Euglossa</i> | <i>Euglossa orellana</i>        |
| PLCOL40920 | <i>Euglossa</i> | <i>Euglossa orellana</i>        |
| PLCOL41020 | <i>Euglossa</i> | <i>Euglossa orellana</i>        |
| PLCOL41120 | <i>Euglossa</i> | <i>Euglossa orellana</i>        |
| PLCOL41220 | <i>Euglossa</i> | <i>Euglossa orellana</i>        |
| PLCOL43920 | <i>Euglossa</i> | <i>Euglossa orellana</i>        |
| PLCOL44820 | <i>Euglossa</i> | <i>Euglossa orellana</i>        |
| PLCOL44920 | <i>Euglossa</i> | <i>Euglossa orellana</i>        |
| GBAH635909 | <i>Euglossa</i> | <i>Euglossa paisa</i>           |
| GBAH636009 | <i>Euglossa</i> | <i>Euglossa paisa</i>           |
| GBAH634309 | <i>Euglossa</i> | <i>Euglossa parvula</i>         |
| GBAH634609 | <i>Euglossa</i> | <i>Euglossa perfulgens</i>      |
| DRBEE01907 | <i>Euglossa</i> | <i>Euglossa piliventris</i>     |
| DRBEE03607 | <i>Euglossa</i> | <i>Euglossa polita</i>          |
| DRBEE09307 | <i>Euglossa</i> | <i>Euglossa prasina</i>         |
| GBAH625709 | <i>Euglossa</i> | <i>Euglossa prasina</i>         |
| DRBEE15707 | <i>Euglossa</i> | <i>Euglossa pseudotownsendi</i> |
| DRBEE04407 | <i>Euglossa</i> | <i>Euglossa purpurea</i>        |
| GBAH635209 | <i>Euglossa</i> | <i>Euglossa purpurea</i>        |
| DRBEE03007 | <i>Euglossa</i> | <i>Euglossa retroviridis</i>    |
| GBAH624909 | <i>Euglossa</i> | <i>Euglossa retroviridis</i>    |
| DRBEE04907 | <i>Euglossa</i> | <i>Euglossa rufipes</i>         |
| GBAH627609 | <i>Euglossa</i> | <i>Euglossa rufipes</i>         |
| DRBEE07707 | <i>Euglossa</i> | <i>Euglossa rugilabris</i>      |
| GBAH635509 | <i>Euglossa</i> | <i>Euglossa rugilabris</i>      |
| GBAH634509 | <i>Euglossa</i> | <i>Euglossa samperi</i>         |
| ASINH36112 | <i>Euglossa</i> | <i>Euglossa sapphirina</i>      |
| ASINH36412 | <i>Euglossa</i> | <i>Euglossa sapphirina</i>      |
| ASINH36512 | <i>Euglossa</i> | <i>Euglossa sapphirina</i>      |
| ASINH36612 | <i>Euglossa</i> | <i>Euglossa sapphirina</i>      |
| ASINH36712 | <i>Euglossa</i> | <i>Euglossa sapphirina</i>      |
| ASINH36812 | <i>Euglossa</i> | <i>Euglossa sapphirina</i>      |
| ASINH36912 | <i>Euglossa</i> | <i>Euglossa sapphirina</i>      |
| ASINH37112 | <i>Euglossa</i> | <i>Euglossa sapphirina</i>      |
| ASINH37212 | <i>Euglossa</i> | <i>Euglossa sapphirina</i>      |
| GBAH632109 | <i>Euglossa</i> | <i>Euglossa sapphirina</i>      |
| OBP06005   | <i>Euglossa</i> | <i>Euglossa sapphirina</i>      |
| OBP06105   | <i>Euglossa</i> | <i>Euglossa sapphirina</i>      |
| OBP06205   | <i>Euglossa</i> | <i>Euglossa sapphirina</i>      |



|             |                 |                            |                            |
|-------------|-----------------|----------------------------|----------------------------|
| OBP06305    | <i>Euglossa</i> | <i>Euglossa sapphirina</i> |                            |
| OBP06405    | <i>Euglossa</i> | <i>Euglossa sapphirina</i> |                            |
| OBP06505    | <i>Euglossa</i> | <i>Euglossa sapphirina</i> |                            |
| DRBEE11107  | <i>Euglossa</i> | <i>Euglossa securigera</i> |                            |
| DRBEE16307  | <i>Euglossa</i> | <i>Euglossa securigera</i> |                            |
| GBAH633309  | <i>Euglossa</i> | <i>Euglossa securigera</i> |                            |
| GBAH1114615 | <i>Euglossa</i> | <i>Euglossa stellfeldi</i> |                            |
| GBAH1114715 | <i>Euglossa</i> | <i>Euglossa stellfeldi</i> |                            |
| GBAH1114815 | <i>Euglossa</i> | <i>Euglossa stellfeldi</i> |                            |
| GBAH1114915 | <i>Euglossa</i> | <i>Euglossa stellfeldi</i> |                            |
| GBAH1115015 | <i>Euglossa</i> | <i>Euglossa stellfeldi</i> |                            |
| GBAH1115115 | <i>Euglossa</i> | <i>Euglossa stellfeldi</i> |                            |
| GBAH1115215 | <i>Euglossa</i> | <i>Euglossa stellfeldi</i> |                            |
| GBAH1115315 | <i>Euglossa</i> | <i>Euglossa stellfeldi</i> |                            |
| DRBEE07507  | <i>Euglossa</i> | <i>Euglossa stilbonota</i> | <i>Euglossa stilbonata</i> |
| GBAH631109  | <i>Euglossa</i> | <i>Euglossa stilbonota</i> | <i>Euglossa stilbonata</i> |
| DRBEE01607  | <i>Euglossa</i> | <i>Euglossa townsendi</i>  |                            |
| DRBEE01707  | <i>Euglossa</i> | <i>Euglossa townsendi</i>  |                            |
| DRBEE01807  | <i>Euglossa</i> | <i>Euglossa townsendi</i>  |                            |
| GBAH1115415 | <i>Euglossa</i> | <i>Euglossa townsendi</i>  |                            |
| GBAH1115515 | <i>Euglossa</i> | <i>Euglossa townsendi</i>  |                            |
| GBAH1115615 | <i>Euglossa</i> | <i>Euglossa townsendi</i>  |                            |
| GBAH1115715 | <i>Euglossa</i> | <i>Euglossa townsendi</i>  |                            |
| GBAH1115815 | <i>Euglossa</i> | <i>Euglossa townsendi</i>  |                            |
| DRBEE01407  | <i>Euglossa</i> | <i>Euglossa tridentata</i> |                            |
| DRBEE01507  | <i>Euglossa</i> | <i>Euglossa tridentata</i> |                            |
| GBAH624609  | <i>Euglossa</i> | <i>Euglossa tridentata</i> |                            |
| GBAH629209  | <i>Euglossa</i> | <i>Euglossa tridentata</i> |                            |
| OBP02705    | <i>Euglossa</i> | <i>Euglossa tridentata</i> |                            |
| GBAH633409  | <i>Euglossa</i> | <i>Euglossa truncata</i>   |                            |
| ASINH38112  | <i>Euglossa</i> | <i>Euglossa turbinifex</i> |                            |
| ASINH38312  | <i>Euglossa</i> | <i>Euglossa turbinifex</i> |                            |
| DRBEE08607  | <i>Euglossa</i> | <i>Euglossa turbinifex</i> |                            |
| GBAH161606  | <i>Euglossa</i> | <i>Euglossa turbinifex</i> |                            |
| GBAH629409  | <i>Euglossa</i> | <i>Euglossa turbinifex</i> |                            |
| ASINH39812  | <i>Euglossa</i> | <i>Euglossa variabilis</i> |                            |
| ASINH40312  | <i>Euglossa</i> | <i>Euglossa variabilis</i> |                            |
| ASINH40412  | <i>Euglossa</i> | <i>Euglossa variabilis</i> |                            |
| DRBEE09907  | <i>Euglossa</i> | <i>Euglossa variabilis</i> |                            |
| DRBEE17007  | <i>Euglossa</i> | <i>Euglossa variabilis</i> |                            |
| DRBEE18707  | <i>Euglossa</i> | <i>Euglossa variabilis</i> |                            |
| GBAH633709  | <i>Euglossa</i> | <i>Euglossa variabilis</i> |                            |
| ASINH40612  | <i>Euglossa</i> | <i>Euglossa villosa</i>    |                            |
| ASINH40912  | <i>Euglossa</i> | <i>Euglossa villosa</i>    |                            |
| GBAH620209  | <i>Euglossa</i> | <i>Euglossa villosa</i>    |                            |
| GBAH626409  | <i>Euglossa</i> | <i>Euglossa villosa</i>    |                            |

|             |                 |                                |
|-------------|-----------------|--------------------------------|
| GBAH625009  | <i>Euglossa</i> | <i>Euglossa villosiventris</i> |
| GBAH632909  | <i>Euglossa</i> | <i>Euglossa villosiventris</i> |
| PLCOL58220  | <i>Euglossa</i> | <i>Euglossa villosiventris</i> |
| DRBEE12707  | <i>Euglossa</i> | <i>Euglossa viridifrons</i>    |
| GBAH634409  | <i>Euglossa</i> | <i>Euglossa viridifrons</i>    |
| DRBEE12807  | <i>Euglossa</i> | <i>Euglossa viridis</i>        |
| GBAH160706  | <i>Euglossa</i> | <i>Euglossa viridis</i>        |
| GBAH630509  | <i>Euglossa</i> | <i>Euglossa viridis</i>        |
| DRBEE14707  | <i>Euglossa</i> | <i>Euglossa viridissima</i>    |
| GBAH1583619 | <i>Eulaema</i>  | <i>Eulaema atleticana</i>      |
| GBAH1583719 | <i>Eulaema</i>  | <i>Eulaema atleticana</i>      |
| GBAH1583819 | <i>Eulaema</i>  | <i>Eulaema atleticana</i>      |
| GBAH1583919 | <i>Eulaema</i>  | <i>Eulaema atleticana</i>      |
| GBAH1584019 | <i>Eulaema</i>  | <i>Eulaema atleticana</i>      |
| GBAH1584119 | <i>Eulaema</i>  | <i>Eulaema atleticana</i>      |
| GBAH1584219 | <i>Eulaema</i>  | <i>Eulaema atleticana</i>      |
| GBAH1584319 | <i>Eulaema</i>  | <i>Eulaema atleticana</i>      |
| GBAH1584419 | <i>Eulaema</i>  | <i>Eulaema atleticana</i>      |
| GBAH1584519 | <i>Eulaema</i>  | <i>Eulaema atleticana</i>      |
| GBAH1584619 | <i>Eulaema</i>  | <i>Eulaema atleticana</i>      |
| GBAH1584719 | <i>Eulaema</i>  | <i>Eulaema atleticana</i>      |
| GBAH1584819 | <i>Eulaema</i>  | <i>Eulaema atleticana</i>      |
| GBAH1584919 | <i>Eulaema</i>  | <i>Eulaema atleticana</i>      |
| GBAH1585019 | <i>Eulaema</i>  | <i>Eulaema atleticana</i>      |
| GBAH1585119 | <i>Eulaema</i>  | <i>Eulaema atleticana</i>      |
| GBAH1585219 | <i>Eulaema</i>  | <i>Eulaema atleticana</i>      |
| GBAH1585319 | <i>Eulaema</i>  | <i>Eulaema atleticana</i>      |
| GBAH1585419 | <i>Eulaema</i>  | <i>Eulaema atleticana</i>      |
| GBAH1585519 | <i>Eulaema</i>  | <i>Eulaema atleticana</i>      |
| GBAH1585619 | <i>Eulaema</i>  | <i>Eulaema atleticana</i>      |
| GBAH1585719 | <i>Eulaema</i>  | <i>Eulaema atleticana</i>      |
| GBAH1585819 | <i>Eulaema</i>  | <i>Eulaema atleticana</i>      |
| GBAH1585919 | <i>Eulaema</i>  | <i>Eulaema atleticana</i>      |
| GBAH1586019 | <i>Eulaema</i>  | <i>Eulaema atleticana</i>      |
| GBAH1586119 | <i>Eulaema</i>  | <i>Eulaema atleticana</i>      |
| GBAH1586219 | <i>Eulaema</i>  | <i>Eulaema atleticana</i>      |
| GBAH1586319 | <i>Eulaema</i>  | <i>Eulaema atleticana</i>      |
| GBAH1586419 | <i>Eulaema</i>  | <i>Eulaema atleticana</i>      |
| GBAH1586519 | <i>Eulaema</i>  | <i>Eulaema atleticana</i>      |
| GBAH1586619 | <i>Eulaema</i>  | <i>Eulaema atleticana</i>      |
| GBAH1586719 | <i>Eulaema</i>  | <i>Eulaema atleticana</i>      |
| GBAH1586819 | <i>Eulaema</i>  | <i>Eulaema atleticana</i>      |
| GBAH1586919 | <i>Eulaema</i>  | <i>Eulaema atleticana</i>      |
| GBAH1587019 | <i>Eulaema</i>  | <i>Eulaema atleticana</i>      |
| GBAH1587119 | <i>Eulaema</i>  | <i>Eulaema atleticana</i>      |
| GBAH1587219 | <i>Eulaema</i>  | <i>Eulaema atleticana</i>      |

|             |                |                           |
|-------------|----------------|---------------------------|
| GBAH1587319 | <i>Eulaema</i> | <i>Eulaema atleticana</i> |
| GBAH1587419 | <i>Eulaema</i> | <i>Eulaema atleticana</i> |
| GBAH1587519 | <i>Eulaema</i> | <i>Eulaema atleticana</i> |
| GBAH1587619 | <i>Eulaema</i> | <i>Eulaema atleticana</i> |
| GBAH1587719 | <i>Eulaema</i> | <i>Eulaema atleticana</i> |
| GBAH1587819 | <i>Eulaema</i> | <i>Eulaema atleticana</i> |
| GBAH1587919 | <i>Eulaema</i> | <i>Eulaema atleticana</i> |
| GBAH1588019 | <i>Eulaema</i> | <i>Eulaema atleticana</i> |
| GBAH1588119 | <i>Eulaema</i> | <i>Eulaema atleticana</i> |
| GBAH1588219 | <i>Eulaema</i> | <i>Eulaema atleticana</i> |
| GBAH1588319 | <i>Eulaema</i> | <i>Eulaema atleticana</i> |
| GBAH1588419 | <i>Eulaema</i> | <i>Eulaema atleticana</i> |
| GBAH1588519 | <i>Eulaema</i> | <i>Eulaema atleticana</i> |
| GBAH1588619 | <i>Eulaema</i> | <i>Eulaema atleticana</i> |
| GBAH1588719 | <i>Eulaema</i> | <i>Eulaema atleticana</i> |
| GBAH1588819 | <i>Eulaema</i> | <i>Eulaema atleticana</i> |
| GBAH1588919 | <i>Eulaema</i> | <i>Eulaema atleticana</i> |
| GBAH1589019 | <i>Eulaema</i> | <i>Eulaema atleticana</i> |
| GBAH1589119 | <i>Eulaema</i> | <i>Eulaema atleticana</i> |
| GBAH1589219 | <i>Eulaema</i> | <i>Eulaema atleticana</i> |
| GBAH1589319 | <i>Eulaema</i> | <i>Eulaema atleticana</i> |
| GBAH1589419 | <i>Eulaema</i> | <i>Eulaema atleticana</i> |
| GBAH1589519 | <i>Eulaema</i> | <i>Eulaema atleticana</i> |
| GBAH1589619 | <i>Eulaema</i> | <i>Eulaema atleticana</i> |
| GBAH1589719 | <i>Eulaema</i> | <i>Eulaema atleticana</i> |
| GBAH1589819 | <i>Eulaema</i> | <i>Eulaema atleticana</i> |
| GBAH1589919 | <i>Eulaema</i> | <i>Eulaema atleticana</i> |
| GBAH1590019 | <i>Eulaema</i> | <i>Eulaema atleticana</i> |
| GBAH1590119 | <i>Eulaema</i> | <i>Eulaema atleticana</i> |
| GBAH1590219 | <i>Eulaema</i> | <i>Eulaema atleticana</i> |
| GBAH1590319 | <i>Eulaema</i> | <i>Eulaema atleticana</i> |
| GBAH1590419 | <i>Eulaema</i> | <i>Eulaema atleticana</i> |
| GBAH1590519 | <i>Eulaema</i> | <i>Eulaema atleticana</i> |
| GBAH1590619 | <i>Eulaema</i> | <i>Eulaema atleticana</i> |
| GBAH1590719 | <i>Eulaema</i> | <i>Eulaema atleticana</i> |
| GBAH1590819 | <i>Eulaema</i> | <i>Eulaema atleticana</i> |
| GBAH1590919 | <i>Eulaema</i> | <i>Eulaema atleticana</i> |
| GBAH1591019 | <i>Eulaema</i> | <i>Eulaema atleticana</i> |
| GBAH1591119 | <i>Eulaema</i> | <i>Eulaema atleticana</i> |
| GBAH1591219 | <i>Eulaema</i> | <i>Eulaema atleticana</i> |
| GBAH1591319 | <i>Eulaema</i> | <i>Eulaema atleticana</i> |
| GBAH1591419 | <i>Eulaema</i> | <i>Eulaema atleticana</i> |
| GBAH1591519 | <i>Eulaema</i> | <i>Eulaema atleticana</i> |
| GBAH1591619 | <i>Eulaema</i> | <i>Eulaema atleticana</i> |
| GBAH1591719 | <i>Eulaema</i> | <i>Eulaema atleticana</i> |
| GBAH1591819 | <i>Eulaema</i> | <i>Eulaema atleticana</i> |

|             |                |                           |
|-------------|----------------|---------------------------|
| GBAH1591919 | <i>Eulaema</i> | <i>Eulaema atleticana</i> |
| GBAH1592019 | <i>Eulaema</i> | <i>Eulaema atleticana</i> |
| GBAH1592119 | <i>Eulaema</i> | <i>Eulaema atleticana</i> |
| GBAH1592219 | <i>Eulaema</i> | <i>Eulaema atleticana</i> |
| GBAH1592319 | <i>Eulaema</i> | <i>Eulaema atleticana</i> |
| GBAH1592419 | <i>Eulaema</i> | <i>Eulaema atleticana</i> |
| GBAH1592519 | <i>Eulaema</i> | <i>Eulaema atleticana</i> |
| GBAH1592619 | <i>Eulaema</i> | <i>Eulaema atleticana</i> |
| GBAH1592719 | <i>Eulaema</i> | <i>Eulaema atleticana</i> |
| GBAH1592819 | <i>Eulaema</i> | <i>Eulaema atleticana</i> |
| GBAH1592919 | <i>Eulaema</i> | <i>Eulaema atleticana</i> |
| GBAH1593019 | <i>Eulaema</i> | <i>Eulaema atleticana</i> |
| GBAH1593119 | <i>Eulaema</i> | <i>Eulaema atleticana</i> |
| GBAH1593219 | <i>Eulaema</i> | <i>Eulaema atleticana</i> |
| GBAH1593319 | <i>Eulaema</i> | <i>Eulaema atleticana</i> |
| GBAH1593419 | <i>Eulaema</i> | <i>Eulaema atleticana</i> |
| GBAH1593519 | <i>Eulaema</i> | <i>Eulaema atleticana</i> |
| GBAH1593619 | <i>Eulaema</i> | <i>Eulaema atleticana</i> |
| GBAH1593719 | <i>Eulaema</i> | <i>Eulaema atleticana</i> |
| GBAH1593819 | <i>Eulaema</i> | <i>Eulaema atleticana</i> |
| GBAH1593919 | <i>Eulaema</i> | <i>Eulaema atleticana</i> |
| GBAH1594019 | <i>Eulaema</i> | <i>Eulaema atleticana</i> |
| GBAH1594119 | <i>Eulaema</i> | <i>Eulaema atleticana</i> |
| GBAH1594219 | <i>Eulaema</i> | <i>Eulaema atleticana</i> |
| GBAH1594319 | <i>Eulaema</i> | <i>Eulaema atleticana</i> |
| GBAH1594419 | <i>Eulaema</i> | <i>Eulaema atleticana</i> |
| GBAH1594519 | <i>Eulaema</i> | <i>Eulaema atleticana</i> |
| GBAH1594619 | <i>Eulaema</i> | <i>Eulaema atleticana</i> |
| GBAH1594719 | <i>Eulaema</i> | <i>Eulaema atleticana</i> |
| GBAH1594819 | <i>Eulaema</i> | <i>Eulaema atleticana</i> |
| GBAH1594919 | <i>Eulaema</i> | <i>Eulaema atleticana</i> |
| GBAH1595019 | <i>Eulaema</i> | <i>Eulaema atleticana</i> |
| GBAH1595119 | <i>Eulaema</i> | <i>Eulaema atleticana</i> |
| GBAH1595219 | <i>Eulaema</i> | <i>Eulaema atleticana</i> |
| GBAH1595319 | <i>Eulaema</i> | <i>Eulaema atleticana</i> |
| GBAH1595419 | <i>Eulaema</i> | <i>Eulaema atleticana</i> |
| GBAH1595519 | <i>Eulaema</i> | <i>Eulaema atleticana</i> |
| GBAH1595619 | <i>Eulaema</i> | <i>Eulaema atleticana</i> |
| GBAH1595719 | <i>Eulaema</i> | <i>Eulaema atleticana</i> |
| GBAH1595819 | <i>Eulaema</i> | <i>Eulaema atleticana</i> |
| GBAH1595919 | <i>Eulaema</i> | <i>Eulaema atleticana</i> |
| GBAH1596019 | <i>Eulaema</i> | <i>Eulaema atleticana</i> |
| GBAH1596119 | <i>Eulaema</i> | <i>Eulaema atleticana</i> |
| GBAH1596219 | <i>Eulaema</i> | <i>Eulaema atleticana</i> |
| GBAH1596319 | <i>Eulaema</i> | <i>Eulaema atleticana</i> |
| GBAH1596419 | <i>Eulaema</i> | <i>Eulaema atleticana</i> |

|             |                |                           |
|-------------|----------------|---------------------------|
| GBAH1596519 | <i>Eulaema</i> | <i>Eulaema atleticana</i> |
| GBAH1596619 | <i>Eulaema</i> | <i>Eulaema atleticana</i> |
| GBAH1596719 | <i>Eulaema</i> | <i>Eulaema atleticana</i> |
| GBAH1596819 | <i>Eulaema</i> | <i>Eulaema atleticana</i> |
| GBAH1596919 | <i>Eulaema</i> | <i>Eulaema atleticana</i> |
| GBAH1597019 | <i>Eulaema</i> | <i>Eulaema atleticana</i> |
| GBAH1597119 | <i>Eulaema</i> | <i>Eulaema atleticana</i> |
| GBAH1597219 | <i>Eulaema</i> | <i>Eulaema atleticana</i> |
| GBAH1597319 | <i>Eulaema</i> | <i>Eulaema atleticana</i> |
| GBAH1597419 | <i>Eulaema</i> | <i>Eulaema atleticana</i> |
| GBAH1597519 | <i>Eulaema</i> | <i>Eulaema atleticana</i> |
| GBAH1597619 | <i>Eulaema</i> | <i>Eulaema atleticana</i> |
| GBAH1597719 | <i>Eulaema</i> | <i>Eulaema atleticana</i> |
| GBAH1597819 | <i>Eulaema</i> | <i>Eulaema atleticana</i> |
| GBAH1597919 | <i>Eulaema</i> | <i>Eulaema atleticana</i> |
| GBAH1598019 | <i>Eulaema</i> | <i>Eulaema atleticana</i> |
| GBAH1598119 | <i>Eulaema</i> | <i>Eulaema atleticana</i> |
| GBAH1598219 | <i>Eulaema</i> | <i>Eulaema atleticana</i> |
| GBAH1598319 | <i>Eulaema</i> | <i>Eulaema atleticana</i> |
| GBAH1598419 | <i>Eulaema</i> | <i>Eulaema atleticana</i> |
| GBAH1598519 | <i>Eulaema</i> | <i>Eulaema atleticana</i> |
| GBAH1598619 | <i>Eulaema</i> | <i>Eulaema atleticana</i> |
| GBAH1598719 | <i>Eulaema</i> | <i>Eulaema atleticana</i> |
| GBAH1598819 | <i>Eulaema</i> | <i>Eulaema atleticana</i> |
| GBAH1598919 | <i>Eulaema</i> | <i>Eulaema atleticana</i> |
| GBAH1599019 | <i>Eulaema</i> | <i>Eulaema atleticana</i> |
| GBAH1599119 | <i>Eulaema</i> | <i>Eulaema atleticana</i> |
| GBAH1599219 | <i>Eulaema</i> | <i>Eulaema atleticana</i> |
| GBAH1599319 | <i>Eulaema</i> | <i>Eulaema atleticana</i> |
| GBAH1599419 | <i>Eulaema</i> | <i>Eulaema atleticana</i> |
| GBAH1599519 | <i>Eulaema</i> | <i>Eulaema atleticana</i> |
| GBAH1599619 | <i>Eulaema</i> | <i>Eulaema atleticana</i> |
| GBAH1599719 | <i>Eulaema</i> | <i>Eulaema atleticana</i> |
| GBAH1599819 | <i>Eulaema</i> | <i>Eulaema atleticana</i> |
| GBAH1599919 | <i>Eulaema</i> | <i>Eulaema atleticana</i> |
| GBAH1600019 | <i>Eulaema</i> | <i>Eulaema atleticana</i> |
| GBAH1600119 | <i>Eulaema</i> | <i>Eulaema atleticana</i> |
| GBAH1600219 | <i>Eulaema</i> | <i>Eulaema atleticana</i> |
| GBAH1600319 | <i>Eulaema</i> | <i>Eulaema atleticana</i> |
| GBAH1600419 | <i>Eulaema</i> | <i>Eulaema atleticana</i> |
| GBAH1600519 | <i>Eulaema</i> | <i>Eulaema atleticana</i> |
| GBAH1600619 | <i>Eulaema</i> | <i>Eulaema atleticana</i> |
| GBAH1600719 | <i>Eulaema</i> | <i>Eulaema atleticana</i> |
| GBAH1600819 | <i>Eulaema</i> | <i>Eulaema atleticana</i> |
| GBAH1600919 | <i>Eulaema</i> | <i>Eulaema atleticana</i> |
| GBAH1601019 | <i>Eulaema</i> | <i>Eulaema atleticana</i> |

|             |                |                           |
|-------------|----------------|---------------------------|
| GBAH1601119 | <i>Eulaema</i> | <i>Eulaema atleticana</i> |
| GBAH1601219 | <i>Eulaema</i> | <i>Eulaema atleticana</i> |
| GBAH1601319 | <i>Eulaema</i> | <i>Eulaema atleticana</i> |
| GBAH1601419 | <i>Eulaema</i> | <i>Eulaema atleticana</i> |
| GBAH1601519 | <i>Eulaema</i> | <i>Eulaema atleticana</i> |
| GBAH1601619 | <i>Eulaema</i> | <i>Eulaema atleticana</i> |
| GBAH1601719 | <i>Eulaema</i> | <i>Eulaema atleticana</i> |
| GBAH1601819 | <i>Eulaema</i> | <i>Eulaema atleticana</i> |
| GBAH1601919 | <i>Eulaema</i> | <i>Eulaema atleticana</i> |
| GBAH1602019 | <i>Eulaema</i> | <i>Eulaema atleticana</i> |
| GBAH1602119 | <i>Eulaema</i> | <i>Eulaema atleticana</i> |
| GBAH1602219 | <i>Eulaema</i> | <i>Eulaema atleticana</i> |
| GBAH1602319 | <i>Eulaema</i> | <i>Eulaema atleticana</i> |
| GBAH1602419 | <i>Eulaema</i> | <i>Eulaema atleticana</i> |
| GBAH1602519 | <i>Eulaema</i> | <i>Eulaema atleticana</i> |
| GBAH1602619 | <i>Eulaema</i> | <i>Eulaema atleticana</i> |
| GBAH1602719 | <i>Eulaema</i> | <i>Eulaema atleticana</i> |
| GBAH1602819 | <i>Eulaema</i> | <i>Eulaema atleticana</i> |
| GBAH1602919 | <i>Eulaema</i> | <i>Eulaema atleticana</i> |
| GBAH1603019 | <i>Eulaema</i> | <i>Eulaema atleticana</i> |
| GBAH1603119 | <i>Eulaema</i> | <i>Eulaema atleticana</i> |
| GBAH1603219 | <i>Eulaema</i> | <i>Eulaema atleticana</i> |
| GBAH1603319 | <i>Eulaema</i> | <i>Eulaema atleticana</i> |
| GBAH1603419 | <i>Eulaema</i> | <i>Eulaema atleticana</i> |
| GBAH1603519 | <i>Eulaema</i> | <i>Eulaema atleticana</i> |
| GBAH1603619 | <i>Eulaema</i> | <i>Eulaema atleticana</i> |
| GBAH1603719 | <i>Eulaema</i> | <i>Eulaema atleticana</i> |
| GBAH1603819 | <i>Eulaema</i> | <i>Eulaema atleticana</i> |
| GBAH1603919 | <i>Eulaema</i> | <i>Eulaema atleticana</i> |
| GBAH1604019 | <i>Eulaema</i> | <i>Eulaema atleticana</i> |
| GBAH1604119 | <i>Eulaema</i> | <i>Eulaema atleticana</i> |
| GBAH1604219 | <i>Eulaema</i> | <i>Eulaema atleticana</i> |
| GBAH1604319 | <i>Eulaema</i> | <i>Eulaema atleticana</i> |
| GBAH1604419 | <i>Eulaema</i> | <i>Eulaema atleticana</i> |
| GBAH1604519 | <i>Eulaema</i> | <i>Eulaema atleticana</i> |
| GBAH1604619 | <i>Eulaema</i> | <i>Eulaema atleticana</i> |
| GBAH1604719 | <i>Eulaema</i> | <i>Eulaema atleticana</i> |
| GBAH1604819 | <i>Eulaema</i> | <i>Eulaema atleticana</i> |
| GBAH1604919 | <i>Eulaema</i> | <i>Eulaema atleticana</i> |
| GBAH1605019 | <i>Eulaema</i> | <i>Eulaema atleticana</i> |
| GBAH1605119 | <i>Eulaema</i> | <i>Eulaema atleticana</i> |
| GBAH1605219 | <i>Eulaema</i> | <i>Eulaema atleticana</i> |
| GBAH1605319 | <i>Eulaema</i> | <i>Eulaema atleticana</i> |
| GBAH1605419 | <i>Eulaema</i> | <i>Eulaema atleticana</i> |
| GBAH1605519 | <i>Eulaema</i> | <i>Eulaema atleticana</i> |
| GBAH1605619 | <i>Eulaema</i> | <i>Eulaema atleticana</i> |

|             |                |                           |
|-------------|----------------|---------------------------|
| GBAH1605719 | <i>Eulaema</i> | <i>Eulaema atleticana</i> |
| GBAH1605819 | <i>Eulaema</i> | <i>Eulaema atleticana</i> |
| GBAH1605919 | <i>Eulaema</i> | <i>Eulaema atleticana</i> |
| GBAH1606019 | <i>Eulaema</i> | <i>Eulaema atleticana</i> |
| GBAH1606119 | <i>Eulaema</i> | <i>Eulaema atleticana</i> |
| GBAH1606219 | <i>Eulaema</i> | <i>Eulaema atleticana</i> |
| GBAH1606319 | <i>Eulaema</i> | <i>Eulaema atleticana</i> |
| GBAH1606419 | <i>Eulaema</i> | <i>Eulaema atleticana</i> |
| GBAH1606519 | <i>Eulaema</i> | <i>Eulaema atleticana</i> |
| GBAH1606619 | <i>Eulaema</i> | <i>Eulaema atleticana</i> |
| GBAH1606719 | <i>Eulaema</i> | <i>Eulaema atleticana</i> |
| GBAH1606819 | <i>Eulaema</i> | <i>Eulaema atleticana</i> |
| GBAH1606919 | <i>Eulaema</i> | <i>Eulaema atleticana</i> |
| GBAH1607019 | <i>Eulaema</i> | <i>Eulaema atleticana</i> |
| GBAH1607119 | <i>Eulaema</i> | <i>Eulaema atleticana</i> |
| GBAH1607219 | <i>Eulaema</i> | <i>Eulaema atleticana</i> |
| GBAH1607319 | <i>Eulaema</i> | <i>Eulaema atleticana</i> |
| GBAH1607419 | <i>Eulaema</i> | <i>Eulaema atleticana</i> |
| GBAH1607519 | <i>Eulaema</i> | <i>Eulaema atleticana</i> |
| GBAH1607619 | <i>Eulaema</i> | <i>Eulaema atleticana</i> |
| GBAH1607719 | <i>Eulaema</i> | <i>Eulaema atleticana</i> |
| GBAH1607819 | <i>Eulaema</i> | <i>Eulaema atleticana</i> |
| GBAH1607919 | <i>Eulaema</i> | <i>Eulaema atleticana</i> |
| GBAH1608019 | <i>Eulaema</i> | <i>Eulaema atleticana</i> |
| GBAH1608119 | <i>Eulaema</i> | <i>Eulaema atleticana</i> |
| GBAH1608219 | <i>Eulaema</i> | <i>Eulaema atleticana</i> |
| GBAH1608319 | <i>Eulaema</i> | <i>Eulaema atleticana</i> |
| GBAH1608419 | <i>Eulaema</i> | <i>Eulaema atleticana</i> |
| GBAH1608519 | <i>Eulaema</i> | <i>Eulaema atleticana</i> |
| GBAH1608619 | <i>Eulaema</i> | <i>Eulaema atleticana</i> |
| GBAH1608719 | <i>Eulaema</i> | <i>Eulaema atleticana</i> |
| GBAH1608819 | <i>Eulaema</i> | <i>Eulaema atleticana</i> |
| GBAH1608919 | <i>Eulaema</i> | <i>Eulaema atleticana</i> |
| GBAH1609019 | <i>Eulaema</i> | <i>Eulaema atleticana</i> |
| GBAH1609119 | <i>Eulaema</i> | <i>Eulaema atleticana</i> |
| GBAH1609219 | <i>Eulaema</i> | <i>Eulaema atleticana</i> |
| GBAH1609319 | <i>Eulaema</i> | <i>Eulaema atleticana</i> |
| GBAH1609419 | <i>Eulaema</i> | <i>Eulaema atleticana</i> |
| GBAH1609519 | <i>Eulaema</i> | <i>Eulaema atleticana</i> |
| GBAH1609619 | <i>Eulaema</i> | <i>Eulaema atleticana</i> |
| GBAH1609719 | <i>Eulaema</i> | <i>Eulaema atleticana</i> |
| GBAH1609819 | <i>Eulaema</i> | <i>Eulaema atleticana</i> |
| GBAH1609919 | <i>Eulaema</i> | <i>Eulaema atleticana</i> |
| GBAH1610019 | <i>Eulaema</i> | <i>Eulaema atleticana</i> |
| GBAH1610119 | <i>Eulaema</i> | <i>Eulaema atleticana</i> |
| GBAH1610219 | <i>Eulaema</i> | <i>Eulaema atleticana</i> |

|              |                |                           |
|--------------|----------------|---------------------------|
| GBAH1610319  | <i>Eulaema</i> | <i>Eulaema atleticana</i> |
| GBAH1610419  | <i>Eulaema</i> | <i>Eulaema atleticana</i> |
| GBAH1610519  | <i>Eulaema</i> | <i>Eulaema atleticana</i> |
| GBAH1610619  | <i>Eulaema</i> | <i>Eulaema atleticana</i> |
| GBAH1610719  | <i>Eulaema</i> | <i>Eulaema atleticana</i> |
| GBAH1610819  | <i>Eulaema</i> | <i>Eulaema atleticana</i> |
| GBAH1610919  | <i>Eulaema</i> | <i>Eulaema atleticana</i> |
| GBAH1611019  | <i>Eulaema</i> | <i>Eulaema atleticana</i> |
| GBAH1611119  | <i>Eulaema</i> | <i>Eulaema atleticana</i> |
| GBAH1611219  | <i>Eulaema</i> | <i>Eulaema atleticana</i> |
| GBAH1611319  | <i>Eulaema</i> | <i>Eulaema atleticana</i> |
| GBAH1611419  | <i>Eulaema</i> | <i>Eulaema atleticana</i> |
| GBAH1611519  | <i>Eulaema</i> | <i>Eulaema atleticana</i> |
| GBAH1611619  | <i>Eulaema</i> | <i>Eulaema atleticana</i> |
| GBAH1611719  | <i>Eulaema</i> | <i>Eulaema atleticana</i> |
| GBAH1611819  | <i>Eulaema</i> | <i>Eulaema atleticana</i> |
| GBAH1611919  | <i>Eulaema</i> | <i>Eulaema atleticana</i> |
| GBAH1612019  | <i>Eulaema</i> | <i>Eulaema atleticana</i> |
| GBAH1612119  | <i>Eulaema</i> | <i>Eulaema atleticana</i> |
| GBAH1612219  | <i>Eulaema</i> | <i>Eulaema atleticana</i> |
| GBAH1612319  | <i>Eulaema</i> | <i>Eulaema atleticana</i> |
| GBAH1612419  | <i>Eulaema</i> | <i>Eulaema atleticana</i> |
| GBAH1612519  | <i>Eulaema</i> | <i>Eulaema atleticana</i> |
| GBAH1612619  | <i>Eulaema</i> | <i>Eulaema atleticana</i> |
| GBAH1612719  | <i>Eulaema</i> | <i>Eulaema atleticana</i> |
| GBAH1612819  | <i>Eulaema</i> | <i>Eulaema atleticana</i> |
| GBAH1612919  | <i>Eulaema</i> | <i>Eulaema atleticana</i> |
| GBAH1613019  | <i>Eulaema</i> | <i>Eulaema atleticana</i> |
| GBAH1613119  | <i>Eulaema</i> | <i>Eulaema atleticana</i> |
| GBAH1613219  | <i>Eulaema</i> | <i>Eulaema atleticana</i> |
| GBAH1613319  | <i>Eulaema</i> | <i>Eulaema atleticana</i> |
| GBAH1613419  | <i>Eulaema</i> | <i>Eulaema atleticana</i> |
| GBAH1613519  | <i>Eulaema</i> | <i>Eulaema atleticana</i> |
| GBAH1613619  | <i>Eulaema</i> | <i>Eulaema atleticana</i> |
| GBAH1613719  | <i>Eulaema</i> | <i>Eulaema atleticana</i> |
| GBAH1613819  | <i>Eulaema</i> | <i>Eulaema atleticana</i> |
| GBAH1613919  | <i>Eulaema</i> | <i>Eulaema atleticana</i> |
| GBAH1614019  | <i>Eulaema</i> | <i>Eulaema atleticana</i> |
| GBMIN7292217 | <i>Eulaema</i> | <i>Eulaema atleticana</i> |
| GBMIN7292317 | <i>Eulaema</i> | <i>Eulaema atleticana</i> |
| GBMIN7292417 | <i>Eulaema</i> | <i>Eulaema atleticana</i> |
| GBMIN7292517 | <i>Eulaema</i> | <i>Eulaema atleticana</i> |
| GBMIN7292617 | <i>Eulaema</i> | <i>Eulaema atleticana</i> |
| GBMIN7292717 | <i>Eulaema</i> | <i>Eulaema atleticana</i> |
| GBMIN7292817 | <i>Eulaema</i> | <i>Eulaema atleticana</i> |
| GBMIN7292917 | <i>Eulaema</i> | <i>Eulaema atleticana</i> |



|              |                |                           |
|--------------|----------------|---------------------------|
| GBMIN7293017 | <i>Eulaema</i> | <i>Eulaema atleticana</i> |
| GBMIN7293117 | <i>Eulaema</i> | <i>Eulaema atleticana</i> |
| GBMIN7293217 | <i>Eulaema</i> | <i>Eulaema atleticana</i> |
| GBMIN7293317 | <i>Eulaema</i> | <i>Eulaema atleticana</i> |
| GBMIN7293417 | <i>Eulaema</i> | <i>Eulaema atleticana</i> |
| GBMIN7293517 | <i>Eulaema</i> | <i>Eulaema atleticana</i> |
| GBMIN7293617 | <i>Eulaema</i> | <i>Eulaema atleticana</i> |
| GBMIN7293717 | <i>Eulaema</i> | <i>Eulaema atleticana</i> |
| GBMIN7293817 | <i>Eulaema</i> | <i>Eulaema atleticana</i> |
| GBMIN7293917 | <i>Eulaema</i> | <i>Eulaema atleticana</i> |
| GBMIN7294017 | <i>Eulaema</i> | <i>Eulaema atleticana</i> |
| GBMIN7294117 | <i>Eulaema</i> | <i>Eulaema atleticana</i> |
| GBMIN7294217 | <i>Eulaema</i> | <i>Eulaema atleticana</i> |
| GBMIN7294317 | <i>Eulaema</i> | <i>Eulaema atleticana</i> |
| GBMIN7294417 | <i>Eulaema</i> | <i>Eulaema atleticana</i> |
| GBMIN7294517 | <i>Eulaema</i> | <i>Eulaema atleticana</i> |
| GBMIN7294617 | <i>Eulaema</i> | <i>Eulaema atleticana</i> |
| GBMIN7294717 | <i>Eulaema</i> | <i>Eulaema atleticana</i> |
| GBMIN7294817 | <i>Eulaema</i> | <i>Eulaema atleticana</i> |
| GBMIN7294917 | <i>Eulaema</i> | <i>Eulaema atleticana</i> |
| GBMIN7295017 | <i>Eulaema</i> | <i>Eulaema atleticana</i> |
| GBMIN7295117 | <i>Eulaema</i> | <i>Eulaema atleticana</i> |
| GBMIN7295217 | <i>Eulaema</i> | <i>Eulaema atleticana</i> |
| GBMIN7295317 | <i>Eulaema</i> | <i>Eulaema atleticana</i> |
| GBMIN7295417 | <i>Eulaema</i> | <i>Eulaema atleticana</i> |
| GBMIN7295517 | <i>Eulaema</i> | <i>Eulaema atleticana</i> |
| GBMIN7295617 | <i>Eulaema</i> | <i>Eulaema atleticana</i> |
| GBMIN7295717 | <i>Eulaema</i> | <i>Eulaema atleticana</i> |
| GBMIN7295817 | <i>Eulaema</i> | <i>Eulaema atleticana</i> |
| GBMIN7295917 | <i>Eulaema</i> | <i>Eulaema atleticana</i> |
| GBMIN7296017 | <i>Eulaema</i> | <i>Eulaema atleticana</i> |
| GBMIN7296117 | <i>Eulaema</i> | <i>Eulaema atleticana</i> |
| GBMIN7296217 | <i>Eulaema</i> | <i>Eulaema atleticana</i> |
| GBMIN7296317 | <i>Eulaema</i> | <i>Eulaema atleticana</i> |
| GBMIN7296417 | <i>Eulaema</i> | <i>Eulaema atleticana</i> |
| GBMIN7296517 | <i>Eulaema</i> | <i>Eulaema atleticana</i> |
| GBMIN7296617 | <i>Eulaema</i> | <i>Eulaema atleticana</i> |
| GBMIN7296717 | <i>Eulaema</i> | <i>Eulaema atleticana</i> |
| GBMIN7296817 | <i>Eulaema</i> | <i>Eulaema atleticana</i> |
| GBMIN7296917 | <i>Eulaema</i> | <i>Eulaema atleticana</i> |
| GBMIN7297017 | <i>Eulaema</i> | <i>Eulaema atleticana</i> |
| GBMIN7297117 | <i>Eulaema</i> | <i>Eulaema atleticana</i> |
| GBMIN7297217 | <i>Eulaema</i> | <i>Eulaema atleticana</i> |
| GBMIN7297317 | <i>Eulaema</i> | <i>Eulaema atleticana</i> |
| GBMIN7297417 | <i>Eulaema</i> | <i>Eulaema atleticana</i> |
| GBMIN7297517 | <i>Eulaema</i> | <i>Eulaema atleticana</i> |

|              |                |                           |
|--------------|----------------|---------------------------|
| GBMIN7297617 | <i>Eulaema</i> | <i>Eulaema atleticana</i> |
| GBMIN7297717 | <i>Eulaema</i> | <i>Eulaema atleticana</i> |
| GBMIN7297817 | <i>Eulaema</i> | <i>Eulaema atleticana</i> |
| GBMIN7297917 | <i>Eulaema</i> | <i>Eulaema atleticana</i> |
| GBMIN7298017 | <i>Eulaema</i> | <i>Eulaema atleticana</i> |
| GBMIN7298117 | <i>Eulaema</i> | <i>Eulaema atleticana</i> |
| GBMIN7298217 | <i>Eulaema</i> | <i>Eulaema atleticana</i> |
| GBMIN7298317 | <i>Eulaema</i> | <i>Eulaema atleticana</i> |
| GBMIN7298417 | <i>Eulaema</i> | <i>Eulaema atleticana</i> |
| GBMIN7298517 | <i>Eulaema</i> | <i>Eulaema atleticana</i> |
| GBMIN7298617 | <i>Eulaema</i> | <i>Eulaema atleticana</i> |
| GBMIN7298717 | <i>Eulaema</i> | <i>Eulaema atleticana</i> |
| GBMIN7298817 | <i>Eulaema</i> | <i>Eulaema atleticana</i> |
| GBMIN7298917 | <i>Eulaema</i> | <i>Eulaema atleticana</i> |
| GBMIN7299017 | <i>Eulaema</i> | <i>Eulaema atleticana</i> |
| GBMIN7299117 | <i>Eulaema</i> | <i>Eulaema atleticana</i> |
| GBMIN7299217 | <i>Eulaema</i> | <i>Eulaema atleticana</i> |
| GBMIN7299317 | <i>Eulaema</i> | <i>Eulaema atleticana</i> |
| GBMIN7299417 | <i>Eulaema</i> | <i>Eulaema atleticana</i> |
| GBMIN7299517 | <i>Eulaema</i> | <i>Eulaema atleticana</i> |
| GBMIN7299617 | <i>Eulaema</i> | <i>Eulaema atleticana</i> |
| GBMIN7299717 | <i>Eulaema</i> | <i>Eulaema atleticana</i> |
| GBMIN7299817 | <i>Eulaema</i> | <i>Eulaema atleticana</i> |
| GBMIN7299917 | <i>Eulaema</i> | <i>Eulaema atleticana</i> |
| GBMIN7300017 | <i>Eulaema</i> | <i>Eulaema atleticana</i> |
| GBMIN7300117 | <i>Eulaema</i> | <i>Eulaema atleticana</i> |
| GBMIN7300217 | <i>Eulaema</i> | <i>Eulaema atleticana</i> |
| GBMIN7300317 | <i>Eulaema</i> | <i>Eulaema atleticana</i> |
| GBMIN7300417 | <i>Eulaema</i> | <i>Eulaema atleticana</i> |
| GBMIN7300517 | <i>Eulaema</i> | <i>Eulaema atleticana</i> |
| GBMIN7300617 | <i>Eulaema</i> | <i>Eulaema atleticana</i> |
| GBMIN7300717 | <i>Eulaema</i> | <i>Eulaema atleticana</i> |
| GBMIN7300817 | <i>Eulaema</i> | <i>Eulaema atleticana</i> |
| GBMIN7300917 | <i>Eulaema</i> | <i>Eulaema atleticana</i> |
| GBMIN7301017 | <i>Eulaema</i> | <i>Eulaema atleticana</i> |
| GBMIN7301117 | <i>Eulaema</i> | <i>Eulaema atleticana</i> |
| GBMIN7301217 | <i>Eulaema</i> | <i>Eulaema atleticana</i> |
| GBMIN7301317 | <i>Eulaema</i> | <i>Eulaema atleticana</i> |
| GBMIN7301417 | <i>Eulaema</i> | <i>Eulaema atleticana</i> |
| GBMIN7301517 | <i>Eulaema</i> | <i>Eulaema atleticana</i> |
| GBMIN7301617 | <i>Eulaema</i> | <i>Eulaema atleticana</i> |
| GBMIN7301717 | <i>Eulaema</i> | <i>Eulaema atleticana</i> |
| GBMIN7301817 | <i>Eulaema</i> | <i>Eulaema atleticana</i> |
| GBMIN7301917 | <i>Eulaema</i> | <i>Eulaema atleticana</i> |
| GBMIN7302017 | <i>Eulaema</i> | <i>Eulaema atleticana</i> |
| GBMIN7302117 | <i>Eulaema</i> | <i>Eulaema atleticana</i> |

|              |                |                           |
|--------------|----------------|---------------------------|
| GBMIN7302217 | <i>Eulaema</i> | <i>Eulaema atleticana</i> |
| GBMIN7302317 | <i>Eulaema</i> | <i>Eulaema atleticana</i> |
| GBMIN7302417 | <i>Eulaema</i> | <i>Eulaema atleticana</i> |
| GBMIN7302517 | <i>Eulaema</i> | <i>Eulaema atleticana</i> |
| GBMIN7302617 | <i>Eulaema</i> | <i>Eulaema atleticana</i> |
| GBMIN7302717 | <i>Eulaema</i> | <i>Eulaema atleticana</i> |
| GBMIN7302817 | <i>Eulaema</i> | <i>Eulaema atleticana</i> |
| GBMIN7302917 | <i>Eulaema</i> | <i>Eulaema atleticana</i> |
| GBMIN7303017 | <i>Eulaema</i> | <i>Eulaema atleticana</i> |
| GBMIN7303117 | <i>Eulaema</i> | <i>Eulaema atleticana</i> |
| GBMIN7303217 | <i>Eulaema</i> | <i>Eulaema atleticana</i> |
| GBMIN7303317 | <i>Eulaema</i> | <i>Eulaema atleticana</i> |
| GBMIN7303417 | <i>Eulaema</i> | <i>Eulaema atleticana</i> |
| GBMIN7303517 | <i>Eulaema</i> | <i>Eulaema atleticana</i> |
| GBMIN7303617 | <i>Eulaema</i> | <i>Eulaema atleticana</i> |
| GBMIN7303717 | <i>Eulaema</i> | <i>Eulaema atleticana</i> |
| GBMIN7303817 | <i>Eulaema</i> | <i>Eulaema atleticana</i> |
| GBMIN7303917 | <i>Eulaema</i> | <i>Eulaema atleticana</i> |
| GBMIN7304017 | <i>Eulaema</i> | <i>Eulaema atleticana</i> |
| GBMIN7304117 | <i>Eulaema</i> | <i>Eulaema atleticana</i> |
| GBMIN7304217 | <i>Eulaema</i> | <i>Eulaema atleticana</i> |
| GBMIN7304317 | <i>Eulaema</i> | <i>Eulaema atleticana</i> |
| GBMIN7304417 | <i>Eulaema</i> | <i>Eulaema atleticana</i> |
| GBMIN7304517 | <i>Eulaema</i> | <i>Eulaema atleticana</i> |
| GBMIN7304617 | <i>Eulaema</i> | <i>Eulaema atleticana</i> |
| GBMIN7304717 | <i>Eulaema</i> | <i>Eulaema atleticana</i> |
| GBMIN7304817 | <i>Eulaema</i> | <i>Eulaema atleticana</i> |
| GBMIN7304917 | <i>Eulaema</i> | <i>Eulaema atleticana</i> |
| GBMIN7305017 | <i>Eulaema</i> | <i>Eulaema atleticana</i> |
| GBMIN7305117 | <i>Eulaema</i> | <i>Eulaema atleticana</i> |
| GBMIN7305217 | <i>Eulaema</i> | <i>Eulaema atleticana</i> |
| GBMIN7305317 | <i>Eulaema</i> | <i>Eulaema atleticana</i> |
| GBMIN7305417 | <i>Eulaema</i> | <i>Eulaema atleticana</i> |
| GBMIN7305517 | <i>Eulaema</i> | <i>Eulaema atleticana</i> |
| GBMIN7305617 | <i>Eulaema</i> | <i>Eulaema atleticana</i> |
| GBMIN7305717 | <i>Eulaema</i> | <i>Eulaema atleticana</i> |
| GBMIN7305817 | <i>Eulaema</i> | <i>Eulaema atleticana</i> |
| GBMIN7305917 | <i>Eulaema</i> | <i>Eulaema atleticana</i> |
| GBMIN7306017 | <i>Eulaema</i> | <i>Eulaema atleticana</i> |
| GBMIN7306117 | <i>Eulaema</i> | <i>Eulaema atleticana</i> |
| GBMIN7306217 | <i>Eulaema</i> | <i>Eulaema atleticana</i> |
| GBMIN7306317 | <i>Eulaema</i> | <i>Eulaema atleticana</i> |
| GBMIN7306417 | <i>Eulaema</i> | <i>Eulaema atleticana</i> |
| GBMIN7306517 | <i>Eulaema</i> | <i>Eulaema atleticana</i> |
| GBMIN7306617 | <i>Eulaema</i> | <i>Eulaema atleticana</i> |
| GBMIN7306717 | <i>Eulaema</i> | <i>Eulaema atleticana</i> |

|              |                |                           |
|--------------|----------------|---------------------------|
| GBMIN7306817 | <i>Eulaema</i> | <i>Eulaema atleticana</i> |
| GBMIN7306917 | <i>Eulaema</i> | <i>Eulaema atleticana</i> |
| GBMIN7307017 | <i>Eulaema</i> | <i>Eulaema atleticana</i> |
| GBMIN7307117 | <i>Eulaema</i> | <i>Eulaema atleticana</i> |
| GBMIN7307217 | <i>Eulaema</i> | <i>Eulaema atleticana</i> |
| GBMIN7307317 | <i>Eulaema</i> | <i>Eulaema atleticana</i> |
| GBMIN7307417 | <i>Eulaema</i> | <i>Eulaema atleticana</i> |
| GBMIN7307517 | <i>Eulaema</i> | <i>Eulaema atleticana</i> |
| GBMIN7307617 | <i>Eulaema</i> | <i>Eulaema atleticana</i> |
| GBMIN7307717 | <i>Eulaema</i> | <i>Eulaema atleticana</i> |
| GBMIN7307817 | <i>Eulaema</i> | <i>Eulaema atleticana</i> |
| GBMIN7307917 | <i>Eulaema</i> | <i>Eulaema atleticana</i> |
| GBMIN7308017 | <i>Eulaema</i> | <i>Eulaema atleticana</i> |
| GBMIN7308117 | <i>Eulaema</i> | <i>Eulaema atleticana</i> |
| GBMIN7308217 | <i>Eulaema</i> | <i>Eulaema atleticana</i> |
| GBMIN7308317 | <i>Eulaema</i> | <i>Eulaema atleticana</i> |
| GBMIN7308417 | <i>Eulaema</i> | <i>Eulaema atleticana</i> |
| GBMIN7308517 | <i>Eulaema</i> | <i>Eulaema atleticana</i> |
| GBMIN7308617 | <i>Eulaema</i> | <i>Eulaema atleticana</i> |
| GBMIN7308717 | <i>Eulaema</i> | <i>Eulaema atleticana</i> |
| GBMIN7308817 | <i>Eulaema</i> | <i>Eulaema atleticana</i> |
| GBMIN7308917 | <i>Eulaema</i> | <i>Eulaema atleticana</i> |
| GBMIN7309017 | <i>Eulaema</i> | <i>Eulaema atleticana</i> |
| GBMIN7309117 | <i>Eulaema</i> | <i>Eulaema atleticana</i> |
| GBMIN7309217 | <i>Eulaema</i> | <i>Eulaema atleticana</i> |
| GBMIN7309317 | <i>Eulaema</i> | <i>Eulaema atleticana</i> |
| GBMIN7309417 | <i>Eulaema</i> | <i>Eulaema atleticana</i> |
| GBMIN7309517 | <i>Eulaema</i> | <i>Eulaema atleticana</i> |
| GBMIN7309617 | <i>Eulaema</i> | <i>Eulaema atleticana</i> |
| GBMIN7309717 | <i>Eulaema</i> | <i>Eulaema atleticana</i> |
| GBMIN7309817 | <i>Eulaema</i> | <i>Eulaema atleticana</i> |
| GBMIN7309917 | <i>Eulaema</i> | <i>Eulaema atleticana</i> |
| GBMIN7310017 | <i>Eulaema</i> | <i>Eulaema atleticana</i> |
| GBMIN7310117 | <i>Eulaema</i> | <i>Eulaema atleticana</i> |
| GBMIN7310217 | <i>Eulaema</i> | <i>Eulaema atleticana</i> |
| GBMIN7310317 | <i>Eulaema</i> | <i>Eulaema atleticana</i> |
| GBMIN7310417 | <i>Eulaema</i> | <i>Eulaema atleticana</i> |
| GBMIN7310517 | <i>Eulaema</i> | <i>Eulaema atleticana</i> |
| GBMIN7310617 | <i>Eulaema</i> | <i>Eulaema atleticana</i> |
| GBMIN7310717 | <i>Eulaema</i> | <i>Eulaema atleticana</i> |
| GBMIN7310817 | <i>Eulaema</i> | <i>Eulaema atleticana</i> |
| GBMIN7310917 | <i>Eulaema</i> | <i>Eulaema atleticana</i> |
| GBMIN7311017 | <i>Eulaema</i> | <i>Eulaema atleticana</i> |
| GBMIN7311117 | <i>Eulaema</i> | <i>Eulaema atleticana</i> |
| GBMIN7311217 | <i>Eulaema</i> | <i>Eulaema atleticana</i> |
| GBMIN7311317 | <i>Eulaema</i> | <i>Eulaema atleticana</i> |

|              |                |                           |
|--------------|----------------|---------------------------|
| GBMIN7311417 | <i>Eulaema</i> | <i>Eulaema atleticana</i> |
| GBMIN7311517 | <i>Eulaema</i> | <i>Eulaema atleticana</i> |
| GBMIN7311617 | <i>Eulaema</i> | <i>Eulaema atleticana</i> |
| GBMIN7311717 | <i>Eulaema</i> | <i>Eulaema atleticana</i> |
| GBMIN7311817 | <i>Eulaema</i> | <i>Eulaema atleticana</i> |
| GBMIN7311917 | <i>Eulaema</i> | <i>Eulaema atleticana</i> |
| GBMIN7312017 | <i>Eulaema</i> | <i>Eulaema atleticana</i> |
| GBMIN7312117 | <i>Eulaema</i> | <i>Eulaema atleticana</i> |
| GBMIN7312217 | <i>Eulaema</i> | <i>Eulaema atleticana</i> |
| GBMIN7312317 | <i>Eulaema</i> | <i>Eulaema atleticana</i> |
| GBMIN7312417 | <i>Eulaema</i> | <i>Eulaema atleticana</i> |
| GBMIN7312517 | <i>Eulaema</i> | <i>Eulaema atleticana</i> |
| GBMIN7312617 | <i>Eulaema</i> | <i>Eulaema atleticana</i> |
| GBMIN7312717 | <i>Eulaema</i> | <i>Eulaema atleticana</i> |
| GBMIN7312817 | <i>Eulaema</i> | <i>Eulaema atleticana</i> |
| GBMIN7312917 | <i>Eulaema</i> | <i>Eulaema atleticana</i> |
| GBMIN7313017 | <i>Eulaema</i> | <i>Eulaema atleticana</i> |
| GBMIN7313117 | <i>Eulaema</i> | <i>Eulaema atleticana</i> |
| GBMIN7313217 | <i>Eulaema</i> | <i>Eulaema atleticana</i> |
| GBMIN7313317 | <i>Eulaema</i> | <i>Eulaema atleticana</i> |
| GBMIN7313417 | <i>Eulaema</i> | <i>Eulaema atleticana</i> |
| GBMIN7313517 | <i>Eulaema</i> | <i>Eulaema atleticana</i> |
| GBMIN7313617 | <i>Eulaema</i> | <i>Eulaema atleticana</i> |
| GBMIN7313717 | <i>Eulaema</i> | <i>Eulaema atleticana</i> |
| GBMIN7313817 | <i>Eulaema</i> | <i>Eulaema atleticana</i> |
| GBMIN7313917 | <i>Eulaema</i> | <i>Eulaema atleticana</i> |
| GBMIN7314017 | <i>Eulaema</i> | <i>Eulaema atleticana</i> |
| GBMIN7314117 | <i>Eulaema</i> | <i>Eulaema atleticana</i> |
| GBMIN7314217 | <i>Eulaema</i> | <i>Eulaema atleticana</i> |
| GBMIN7314317 | <i>Eulaema</i> | <i>Eulaema atleticana</i> |
| GBMIN7314417 | <i>Eulaema</i> | <i>Eulaema atleticana</i> |
| GBMIN7314517 | <i>Eulaema</i> | <i>Eulaema atleticana</i> |
| GBMIN7314617 | <i>Eulaema</i> | <i>Eulaema atleticana</i> |
| GBMIN7314717 | <i>Eulaema</i> | <i>Eulaema atleticana</i> |
| GBMIN7314817 | <i>Eulaema</i> | <i>Eulaema atleticana</i> |
| GBMIN7314917 | <i>Eulaema</i> | <i>Eulaema atleticana</i> |
| GBMIN7315017 | <i>Eulaema</i> | <i>Eulaema atleticana</i> |
| GBMIN7315117 | <i>Eulaema</i> | <i>Eulaema atleticana</i> |
| GBMIN7315217 | <i>Eulaema</i> | <i>Eulaema atleticana</i> |
| GBMIN7315317 | <i>Eulaema</i> | <i>Eulaema atleticana</i> |
| GBMIN7315417 | <i>Eulaema</i> | <i>Eulaema atleticana</i> |
| GBMIN7315517 | <i>Eulaema</i> | <i>Eulaema atleticana</i> |
| GBMIN7315617 | <i>Eulaema</i> | <i>Eulaema atleticana</i> |
| GBMIN7315717 | <i>Eulaema</i> | <i>Eulaema atleticana</i> |
| GBMIN7315817 | <i>Eulaema</i> | <i>Eulaema atleticana</i> |
| GBMIN7315917 | <i>Eulaema</i> | <i>Eulaema atleticana</i> |

|              |                |                           |
|--------------|----------------|---------------------------|
| GBMIN7316017 | <i>Eulaema</i> | <i>Eulaema atleticana</i> |
| GBMIN7316117 | <i>Eulaema</i> | <i>Eulaema atleticana</i> |
| GBMIN7316217 | <i>Eulaema</i> | <i>Eulaema atleticana</i> |
| GBMIN7316317 | <i>Eulaema</i> | <i>Eulaema atleticana</i> |
| GBMIN7316417 | <i>Eulaema</i> | <i>Eulaema atleticana</i> |
| GBMIN7316517 | <i>Eulaema</i> | <i>Eulaema atleticana</i> |
| GBMIN7316617 | <i>Eulaema</i> | <i>Eulaema atleticana</i> |
| GBMIN7316717 | <i>Eulaema</i> | <i>Eulaema atleticana</i> |
| GBMIN7316817 | <i>Eulaema</i> | <i>Eulaema atleticana</i> |
| GBMIN7316917 | <i>Eulaema</i> | <i>Eulaema atleticana</i> |
| GBMIN7317017 | <i>Eulaema</i> | <i>Eulaema atleticana</i> |
| GBMIN7317117 | <i>Eulaema</i> | <i>Eulaema atleticana</i> |
| GBMIN7317217 | <i>Eulaema</i> | <i>Eulaema atleticana</i> |
| GBMIN7317317 | <i>Eulaema</i> | <i>Eulaema atleticana</i> |
| GBMIN7317417 | <i>Eulaema</i> | <i>Eulaema atleticana</i> |
| GBMIN7317517 | <i>Eulaema</i> | <i>Eulaema atleticana</i> |
| GBMIN7317617 | <i>Eulaema</i> | <i>Eulaema atleticana</i> |
| GBMIN7317717 | <i>Eulaema</i> | <i>Eulaema atleticana</i> |
| GBMIN7317817 | <i>Eulaema</i> | <i>Eulaema atleticana</i> |
| GBMIN7317917 | <i>Eulaema</i> | <i>Eulaema atleticana</i> |
| GBMIN7318017 | <i>Eulaema</i> | <i>Eulaema atleticana</i> |
| GBMIN7318117 | <i>Eulaema</i> | <i>Eulaema atleticana</i> |
| GBMIN7318217 | <i>Eulaema</i> | <i>Eulaema atleticana</i> |
| GBMIN7318317 | <i>Eulaema</i> | <i>Eulaema atleticana</i> |
| GBMIN7318417 | <i>Eulaema</i> | <i>Eulaema atleticana</i> |
| GBMIN7318517 | <i>Eulaema</i> | <i>Eulaema atleticana</i> |
| GBMIN7318617 | <i>Eulaema</i> | <i>Eulaema atleticana</i> |
| GBMIN7318717 | <i>Eulaema</i> | <i>Eulaema atleticana</i> |
| GBMIN7318817 | <i>Eulaema</i> | <i>Eulaema atleticana</i> |
| GBMIN7318917 | <i>Eulaema</i> | <i>Eulaema atleticana</i> |
| GBMIN7319017 | <i>Eulaema</i> | <i>Eulaema atleticana</i> |
| GBMIN7319117 | <i>Eulaema</i> | <i>Eulaema atleticana</i> |
| GBMIN7319217 | <i>Eulaema</i> | <i>Eulaema atleticana</i> |
| GBMIN7319317 | <i>Eulaema</i> | <i>Eulaema atleticana</i> |
| GBMIN7319417 | <i>Eulaema</i> | <i>Eulaema atleticana</i> |
| GBMIN7319517 | <i>Eulaema</i> | <i>Eulaema atleticana</i> |
| GBMIN7319617 | <i>Eulaema</i> | <i>Eulaema atleticana</i> |
| GBMIN7319717 | <i>Eulaema</i> | <i>Eulaema atleticana</i> |
| GBMIN7319817 | <i>Eulaema</i> | <i>Eulaema atleticana</i> |
| GBMIN7319917 | <i>Eulaema</i> | <i>Eulaema atleticana</i> |
| GBMIN7320017 | <i>Eulaema</i> | <i>Eulaema atleticana</i> |
| GBMIN7320117 | <i>Eulaema</i> | <i>Eulaema atleticana</i> |
| GBMIN7320217 | <i>Eulaema</i> | <i>Eulaema atleticana</i> |
| GBMIN7320317 | <i>Eulaema</i> | <i>Eulaema atleticana</i> |
| GBMIN7320417 | <i>Eulaema</i> | <i>Eulaema atleticana</i> |
| GBMIN7320517 | <i>Eulaema</i> | <i>Eulaema atleticana</i> |

|              |                |                           |
|--------------|----------------|---------------------------|
| GBMIN7320617 | <i>Eulaema</i> | <i>Eulaema atleticana</i> |
| GBMIN7320717 | <i>Eulaema</i> | <i>Eulaema atleticana</i> |
| GBMIN7320817 | <i>Eulaema</i> | <i>Eulaema atleticana</i> |
| GBMIN7320917 | <i>Eulaema</i> | <i>Eulaema atleticana</i> |
| GBMIN7321017 | <i>Eulaema</i> | <i>Eulaema atleticana</i> |
| GBMIN7321117 | <i>Eulaema</i> | <i>Eulaema atleticana</i> |
| GBMIN7321217 | <i>Eulaema</i> | <i>Eulaema atleticana</i> |
| GBMIN7321317 | <i>Eulaema</i> | <i>Eulaema atleticana</i> |
| GBMIN7321417 | <i>Eulaema</i> | <i>Eulaema atleticana</i> |
| GBMIN7321517 | <i>Eulaema</i> | <i>Eulaema atleticana</i> |
| GBMIN7321617 | <i>Eulaema</i> | <i>Eulaema atleticana</i> |
| GBMIN7321717 | <i>Eulaema</i> | <i>Eulaema atleticana</i> |
| GBMIN7321817 | <i>Eulaema</i> | <i>Eulaema atleticana</i> |
| GBMIN7321917 | <i>Eulaema</i> | <i>Eulaema atleticana</i> |
| GBMIN7322017 | <i>Eulaema</i> | <i>Eulaema atleticana</i> |
| GBMIN7322117 | <i>Eulaema</i> | <i>Eulaema atleticana</i> |
| GBMIN7322217 | <i>Eulaema</i> | <i>Eulaema atleticana</i> |
| GBMIN7322317 | <i>Eulaema</i> | <i>Eulaema atleticana</i> |
| GBMIN7322417 | <i>Eulaema</i> | <i>Eulaema atleticana</i> |
| GBMIN7322517 | <i>Eulaema</i> | <i>Eulaema atleticana</i> |
| GBMIN7322617 | <i>Eulaema</i> | <i>Eulaema atleticana</i> |
| GBMIN7322717 | <i>Eulaema</i> | <i>Eulaema atleticana</i> |
| GBMIN7322817 | <i>Eulaema</i> | <i>Eulaema atleticana</i> |
| GBMIN7322917 | <i>Eulaema</i> | <i>Eulaema atleticana</i> |
| GBMIN7323017 | <i>Eulaema</i> | <i>Eulaema atleticana</i> |
| GBMIN7323117 | <i>Eulaema</i> | <i>Eulaema atleticana</i> |
| GBMIN7323217 | <i>Eulaema</i> | <i>Eulaema atleticana</i> |
| GBMIN7323317 | <i>Eulaema</i> | <i>Eulaema atleticana</i> |
| GBMIN7323417 | <i>Eulaema</i> | <i>Eulaema atleticana</i> |
| GBMIN7323517 | <i>Eulaema</i> | <i>Eulaema atleticana</i> |
| GBMIN7323617 | <i>Eulaema</i> | <i>Eulaema atleticana</i> |
| GBMIN7323717 | <i>Eulaema</i> | <i>Eulaema atleticana</i> |
| GBMIN7323817 | <i>Eulaema</i> | <i>Eulaema atleticana</i> |
| GBMIN7323917 | <i>Eulaema</i> | <i>Eulaema atleticana</i> |
| GBMIN7324017 | <i>Eulaema</i> | <i>Eulaema atleticana</i> |
| GBMIN7324117 | <i>Eulaema</i> | <i>Eulaema atleticana</i> |
| GBMIN7324217 | <i>Eulaema</i> | <i>Eulaema atleticana</i> |
| GBMIN7324317 | <i>Eulaema</i> | <i>Eulaema atleticana</i> |
| GBMIN7324417 | <i>Eulaema</i> | <i>Eulaema atleticana</i> |
| GBMIN7324517 | <i>Eulaema</i> | <i>Eulaema atleticana</i> |
| GBMIN7324617 | <i>Eulaema</i> | <i>Eulaema atleticana</i> |
| GBMIN7324717 | <i>Eulaema</i> | <i>Eulaema atleticana</i> |
| GBMIN7324817 | <i>Eulaema</i> | <i>Eulaema atleticana</i> |
| GBMIN7324917 | <i>Eulaema</i> | <i>Eulaema atleticana</i> |
| GBMIN7325017 | <i>Eulaema</i> | <i>Eulaema atleticana</i> |
| GBMIN7325117 | <i>Eulaema</i> | <i>Eulaema atleticana</i> |

|              |                |                            |
|--------------|----------------|----------------------------|
| GBMIN7325217 | <i>Eulaema</i> | <i>Eulaema atleticana</i>  |
| GBMIN7325317 | <i>Eulaema</i> | <i>Eulaema atleticana</i>  |
| GBMIN7325417 | <i>Eulaema</i> | <i>Eulaema atleticana</i>  |
| GBMIN7325517 | <i>Eulaema</i> | <i>Eulaema atleticana</i>  |
| GBMIN7325617 | <i>Eulaema</i> | <i>Eulaema atleticana</i>  |
| GBMIN7325717 | <i>Eulaema</i> | <i>Eulaema atleticana</i>  |
| GBMIN7325817 | <i>Eulaema</i> | <i>Eulaema atleticana</i>  |
| GBMIN7325917 | <i>Eulaema</i> | <i>Eulaema atleticana</i>  |
| GBMIN7326017 | <i>Eulaema</i> | <i>Eulaema atleticana</i>  |
| GBMIN7326117 | <i>Eulaema</i> | <i>Eulaema atleticana</i>  |
| GBMIN7326217 | <i>Eulaema</i> | <i>Eulaema atleticana</i>  |
| GBMIN7326317 | <i>Eulaema</i> | <i>Eulaema atleticana</i>  |
| GBMIN7326417 | <i>Eulaema</i> | <i>Eulaema atleticana</i>  |
| GBMIN7326517 | <i>Eulaema</i> | <i>Eulaema atleticana</i>  |
| GBMIN7326617 | <i>Eulaema</i> | <i>Eulaema atleticana</i>  |
| GBMIN7326717 | <i>Eulaema</i> | <i>Eulaema atleticana</i>  |
| GBMIN7326817 | <i>Eulaema</i> | <i>Eulaema atleticana</i>  |
| GBMIN7326917 | <i>Eulaema</i> | <i>Eulaema atleticana</i>  |
| GBMIN7327017 | <i>Eulaema</i> | <i>Eulaema atleticana</i>  |
| GBMIN7327117 | <i>Eulaema</i> | <i>Eulaema atleticana</i>  |
| GBMIN7327217 | <i>Eulaema</i> | <i>Eulaema atleticana</i>  |
| GBMIN7327317 | <i>Eulaema</i> | <i>Eulaema atleticana</i>  |
| GBMIN7327417 | <i>Eulaema</i> | <i>Eulaema atleticana</i>  |
| GBMIN7327517 | <i>Eulaema</i> | <i>Eulaema atleticana</i>  |
| GBMIN7327617 | <i>Eulaema</i> | <i>Eulaema atleticana</i>  |
| GBMIN7327717 | <i>Eulaema</i> | <i>Eulaema atleticana</i>  |
| GBMIN7327817 | <i>Eulaema</i> | <i>Eulaema atleticana</i>  |
| GBMIN7327917 | <i>Eulaema</i> | <i>Eulaema atleticana</i>  |
| GBMIN7328017 | <i>Eulaema</i> | <i>Eulaema atleticana</i>  |
| GBMIN7328117 | <i>Eulaema</i> | <i>Eulaema atleticana</i>  |
| GBMIN7328217 | <i>Eulaema</i> | <i>Eulaema atleticana</i>  |
| GBAH632709   | <i>Eulaema</i> | <i>Eulaema boliviensis</i> |
| ASINH45612   | <i>Eulaema</i> | <i>Eulaema bombiformis</i> |
| ASINH46012   | <i>Eulaema</i> | <i>Eulaema bombiformis</i> |
| ASINH46112   | <i>Eulaema</i> | <i>Eulaema bombiformis</i> |
| ASINH46412   | <i>Eulaema</i> | <i>Eulaema bombiformis</i> |
| GBAH057306   | <i>Eulaema</i> | <i>Eulaema bombiformis</i> |
| GBAH629609   | <i>Eulaema</i> | <i>Eulaema bombiformis</i> |
| OBP01605     | <i>Eulaema</i> | <i>Eulaema bombiformis</i> |
| OBP01705     | <i>Eulaema</i> | <i>Eulaema bombiformis</i> |
| OBP01805     | <i>Eulaema</i> | <i>Eulaema bombiformis</i> |
| OBP01905     | <i>Eulaema</i> | <i>Eulaema bombiformis</i> |
| OBP02005     | <i>Eulaema</i> | <i>Eulaema bombiformis</i> |
| PLCOL31520   | <i>Eulaema</i> | <i>Eulaema bombiformis</i> |
| GBAH624209   | <i>Eulaema</i> | <i>Eulaema chocoana</i>    |
| ASINH46512   | <i>Eulaema</i> | <i>Eulaema cingulata</i>   |



|            |                |                           |
|------------|----------------|---------------------------|
| ASINH47012 | <i>Eulaema</i> | <i>Eulaema cingulata</i>  |
| ASINH47312 | <i>Eulaema</i> | <i>Eulaema cingulata</i>  |
| ASINH47512 | <i>Eulaema</i> | <i>Eulaema cingulata</i>  |
| DRBEE06607 | <i>Eulaema</i> | <i>Eulaema cingulata</i>  |
| GBAH057206 | <i>Eulaema</i> | <i>Eulaema cingulata</i>  |
| GBAH631909 | <i>Eulaema</i> | <i>Eulaema cingulata</i>  |
| OBP07705   | <i>Eulaema</i> | <i>Eulaema cingulata</i>  |
| OBP07805   | <i>Eulaema</i> | <i>Eulaema cingulata</i>  |
| OBP07905   | <i>Eulaema</i> | <i>Eulaema cingulata</i>  |
| OBP08005   | <i>Eulaema</i> | <i>Eulaema cingulata</i>  |
| OBP08105   | <i>Eulaema</i> | <i>Eulaema cingulata</i>  |
| PLCOL43720 | <i>Eulaema</i> | <i>Eulaema flavescens</i> |
| PLCOL57020 | <i>Eulaema</i> | <i>Eulaema flavescens</i> |
| ASINH48012 | <i>Eulaema</i> | <i>Eulaema leucopyga</i>  |
| GBAH630909 | <i>Eulaema</i> | <i>Eulaema leucopyga</i>  |
| GBAH056906 | <i>Eulaema</i> | <i>Eulaema meriana</i>    |
| GBAH630809 | <i>Eulaema</i> | <i>Eulaema meriana</i>    |
| OBP00105   | <i>Eulaema</i> | <i>Eulaema meriana</i>    |
| OBP00305   | <i>Eulaema</i> | <i>Eulaema meriana</i>    |
| OBP00405   | <i>Eulaema</i> | <i>Eulaema meriana</i>    |
| OBP00505   | <i>Eulaema</i> | <i>Eulaema meriana</i>    |
| PLCOL35820 | <i>Eulaema</i> | <i>Eulaema meriana</i>    |
| PLCOL37020 | <i>Eulaema</i> | <i>Eulaema meriana</i>    |
| PLCOL37120 | <i>Eulaema</i> | <i>Eulaema meriana</i>    |
| PLCOL48320 | <i>Eulaema</i> | <i>Eulaema meriana</i>    |
| PLCOL53420 | <i>Eulaema</i> | <i>Eulaema meriana</i>    |
| GBAH631809 | <i>Eulaema</i> | <i>Eulaema mocsaryi</i>   |
| PLCOL43120 | <i>Eulaema</i> | <i>Eulaema mocsaryi</i>   |
| PLCOL43220 | <i>Eulaema</i> | <i>Eulaema mocsaryi</i>   |
| PLCOL43320 | <i>Eulaema</i> | <i>Eulaema mocsaryi</i>   |
| ASINH49612 | <i>Eulaema</i> | <i>Eulaema nigrita</i>    |
| ASINH50112 | <i>Eulaema</i> | <i>Eulaema nigrita</i>    |
| ASINH50212 | <i>Eulaema</i> | <i>Eulaema nigrita</i>    |
| BOFTW12208 | <i>Eulaema</i> | <i>Eulaema nigrita</i>    |
| GBAH057106 | <i>Eulaema</i> | <i>Eulaema nigrita</i>    |
| GBAH626509 | <i>Eulaema</i> | <i>Eulaema nigrita</i>    |
| GBHAP50414 | <i>Eulaema</i> | <i>Eulaema nigrita</i>    |
| OBP01205   | <i>Eulaema</i> | <i>Eulaema nigrita</i>    |
| OBP01305   | <i>Eulaema</i> | <i>Eulaema nigrita</i>    |
| OBP01405   | <i>Eulaema</i> | <i>Eulaema nigrita</i>    |
| PLCOL52820 | <i>Eulaema</i> | <i>Eulaema nigrita</i>    |
| PLCOL56420 | <i>Eulaema</i> | <i>Eulaema nigrita</i>    |
| PLCOL56520 | <i>Eulaema</i> | <i>Eulaema nigrita</i>    |
| PLCOL56620 | <i>Eulaema</i> | <i>Eulaema nigrita</i>    |
| PLCOL56720 | <i>Eulaema</i> | <i>Eulaema nigrita</i>    |
| GBAH056606 | <i>Eulaema</i> | <i>Eulaema peruviana</i>  |

|            |                 |                                |                          |
|------------|-----------------|--------------------------------|--------------------------|
| ASINH50612 | <i>Eulaema</i>  | <i>Eulaema polychroma</i>      |                          |
| ASINH51112 | <i>Eulaema</i>  | <i>Eulaema polychroma</i>      |                          |
| DRBEE06407 | <i>Eulaema</i>  | <i>Eulaema polychroma</i>      |                          |
| DRBEE09707 | <i>Eulaema</i>  | <i>Eulaema polychroma</i>      |                          |
| DRBEE14607 | <i>Eulaema</i>  | <i>Eulaema polychroma</i>      |                          |
| DRBEE14807 | <i>Eulaema</i>  | <i>Eulaema polychroma</i>      |                          |
| GBAH056806 | <i>Eulaema</i>  | <i>Eulaema polychroma</i>      |                          |
| GBAH624109 | <i>Eulaema</i>  | <i>Eulaema polychroma</i>      |                          |
| DRBEE17607 | <i>Eulaema</i>  | <i>Eulaema polyzona</i>        |                          |
| GBAH056706 | <i>Eulaema</i>  | <i>Eulaema polyzona</i>        |                          |
| DRBEE07107 | <i>Eulaema</i>  | <i>Eulaema pseudocingulata</i> |                          |
| ASINH51312 | <i>Eulaema</i>  | <i>Eulaema seabrai</i>         |                          |
| ASINH51712 | <i>Eulaema</i>  | <i>Eulaema seabrai</i>         |                          |
| ASINH52012 | <i>Eulaema</i>  | <i>Eulaema seabrai</i>         |                          |
| ASINH52112 | <i>Eulaema</i>  | <i>Eulaema seabrai</i>         |                          |
| GBAH627709 | <i>Eulaema</i>  | <i>Eulaema seabrai</i>         |                          |
| GBAH624309 | <i>Eulaema</i>  | <i>Eulaema sororia</i>         |                          |
| ASINH52712 | <i>Eulaema</i>  | <i>Eulaema speciosa</i>        |                          |
| ASINH52812 | <i>Eulaema</i>  | <i>Eulaema speciosa</i>        |                          |
| ASINH52912 | <i>Eulaema</i>  | <i>Eulaema speciosa</i>        |                          |
| ASINH53012 | <i>Eulaema</i>  | <i>Eulaema speciosa</i>        |                          |
| ASINH53112 | <i>Eulaema</i>  | <i>Eulaema speciosa</i>        |                          |
| ASINH53212 | <i>Eulaema</i>  | <i>Eulaema speciosa</i>        |                          |
| DRBEE15507 | <i>Eulaema</i>  | <i>Eulaema speciosa</i>        | <i>Euglossa speciosa</i> |
| GBAH624409 | <i>Eulaema</i>  | <i>Eulaema speciosa</i>        |                          |
| PLCOL49720 | <i>Eulaema</i>  | <i>Eulaema speciosa</i>        |                          |
| GBAH620109 | <i>Exaerete</i> | <i>Exaerete azteca</i>         |                          |
| GBAH626309 | <i>Exaerete</i> | <i>Exaerete azteca</i>         |                          |
| ASINH53812 | <i>Exaerete</i> | <i>Exaerete dentata</i>        |                          |
| GBAH634009 | <i>Exaerete</i> | <i>Exaerete dentata</i>        |                          |
| ASINH54212 | <i>Exaerete</i> | <i>Exaerete frontalis</i>      |                          |
| ASINH54312 | <i>Exaerete</i> | <i>Exaerete frontalis</i>      |                          |
| ASINH54412 | <i>Exaerete</i> | <i>Exaerete frontalis</i>      |                          |
| ASINH54612 | <i>Exaerete</i> | <i>Exaerete frontalis</i>      |                          |
| ASINH54912 | <i>Exaerete</i> | <i>Exaerete frontalis</i>      |                          |
| GBAH634209 | <i>Exaerete</i> | <i>Exaerete frontalis</i>      |                          |
| OBP02105   | <i>Exaerete</i> | <i>Exaerete frontalis</i>      |                          |
| DRBEE13607 | <i>Exaerete</i> | <i>Exaerete lepeletieri</i>    |                          |
| ASINH55312 | <i>Exaerete</i> | <i>Exaerete smaragdina</i>     |                          |
| ASINH55512 | <i>Exaerete</i> | <i>Exaerete smaragdina</i>     |                          |
| ASINH55712 | <i>Exaerete</i> | <i>Exaerete smaragdina</i>     |                          |
| ASINH55912 | <i>Exaerete</i> | <i>Exaerete smaragdina</i>     |                          |
| DRBEE07607 | <i>Exaerete</i> | <i>Exaerete smaragdina</i>     |                          |
| DRBEE17807 | <i>Exaerete</i> | <i>Exaerete smaragdina</i>     |                          |
| GBAH057406 | <i>Exaerete</i> | <i>Exaerete smaragdina</i>     |                          |
| GBAH636309 | <i>Exaerete</i> | <i>Exaerete smaragdina</i>     |                          |

|               |                    |                               |
|---------------|--------------------|-------------------------------|
| GBMIN1229013  | <i>Exaerete</i>    | <i>Exaerete smaragdina</i>    |
| PLCOL31620    | <i>Exaerete</i>    | <i>Exaerete smaragdina</i>    |
| PLCOL32220    | <i>Exaerete</i>    | <i>Exaerete smaragdina</i>    |
| PLCOL37220    | <i>Exaerete</i>    | <i>Exaerete smaragdina</i>    |
| PLCOL37820    | <i>Exaerete</i>    | <i>Exaerete smaragdina</i>    |
| PLCOL37920    | <i>Exaerete</i>    | <i>Exaerete smaragdina</i>    |
| PLCOL38020    | <i>Exaerete</i>    | <i>Exaerete smaragdina</i>    |
| PLCOL39220    | <i>Exaerete</i>    | <i>Exaerete smaragdina</i>    |
| PLCOL43520    | <i>Exaerete</i>    | <i>Exaerete smaragdina</i>    |
| PLCOL43620    | <i>Exaerete</i>    | <i>Exaerete smaragdina</i>    |
| GBAH625309    | <i>Exaerete</i>    | <i>Exaerete trochanterica</i> |
| BBHYA96612    | <i>Exomalopsis</i> | <i>Exomalopsis solani</i>     |
| BBHYA96712    | <i>Exomalopsis</i> | <i>Exomalopsis solani</i>     |
| BOFTW16108    | <i>Exomalopsis</i> | <i>Exomalopsis solitaria</i>  |
| BOFTW16208    | <i>Exomalopsis</i> | <i>Exomalopsis solitaria</i>  |
| GBAH189506    | <i>Exoneura</i>    | <i>Exoneura angophorae</i>    |
| GBAH189706    | <i>Exoneura</i>    | <i>Exoneura nigrescens</i>    |
| SICOB72418    | <i>Exoneura</i>    | <i>Exoneura pictifrons</i>    |
| GBAH189606    | <i>Exoneura</i>    | <i>Exoneura robusta</i>       |
| GBMNB6320320  | <i>Exoneura</i>    | <i>Exoneura robusta</i>       |
| GBMNB6320420  | <i>Exoneura</i>    | <i>Exoneura robusta</i>       |
| GBMNB6320520  | <i>Exoneura</i>    | <i>Exoneura robusta</i>       |
| GBMNB6320620  | <i>Exoneura</i>    | <i>Exoneura robusta</i>       |
| MSAPB131012   | <i>Exoneura</i>    | <i>Exoneura robusta</i>       |
| MSAPB131112   | <i>Exoneura</i>    | <i>Exoneura robusta</i>       |
| MSAPB131212   | <i>Exoneura</i>    | <i>Exoneura robusta</i>       |
| MSAPB131312   | <i>Exoneura</i>    | <i>Exoneura robusta</i>       |
| MSAPB131412   | <i>Exoneura</i>    | <i>Exoneura robusta</i>       |
| GBAH190106    | <i>Exoneurella</i> | <i>Exoneurella eremophila</i> |
| GBAH190206    | <i>Exoneurella</i> | <i>Exoneurella lawsoni</i>    |
| GBAH190006    | <i>Exoneurella</i> | <i>Exoneurella setosa</i>     |
| MSAPB130712   | <i>Exoneurella</i> | <i>Exoneurella setosa</i>     |
| MSAPB132012   | <i>Exoneurella</i> | <i>Exoneurella setosa</i>     |
| MSAPB132112   | <i>Exoneurella</i> | <i>Exoneurella setosa</i>     |
| MSAPB132212   | <i>Exoneurella</i> | <i>Exoneurella setosa</i>     |
| MSAPB132312   | <i>Exoneurella</i> | <i>Exoneurella setosa</i>     |
| GBAH189906    | <i>Exoneurella</i> | <i>Exoneurella tridentata</i> |
| MSAPB131512   | <i>Exoneurella</i> | <i>Exoneurella tridentata</i> |
| MSAPB131612   | <i>Exoneurella</i> | <i>Exoneurella tridentata</i> |
| MSAPB131712   | <i>Exoneurella</i> | <i>Exoneurella tridentata</i> |
| MSAPB131812   | <i>Exoneurella</i> | <i>Exoneurella tridentata</i> |
| MSAPB131912   | <i>Exoneurella</i> | <i>Exoneurella tridentata</i> |
| BEECC28308    | <i>Florilegus</i>  | <i>Florilegus condignus</i>   |
| BOFTW06008    | <i>Florilegus</i>  | <i>Florilegus condignus</i>   |
| GBMIN14274118 | <i>Florilegus</i>  | <i>Florilegus condignus</i>   |
| GBMNA2973219  | <i>Florilegus</i>  | <i>Florilegus festivus</i>    |

|              |                       |                                  |                           |
|--------------|-----------------------|----------------------------------|---------------------------|
| BOFTW13108   | <i>Florilegus</i>     | <i>Florilegus riparius</i>       |                           |
| CNGSB03115   | <i>Habropoda</i>      | <i>Habropoda cineraria</i>       |                           |
| BBHYG57610   | <i>Habropoda</i>      | <i>Habropoda laboriosa</i>       |                           |
| BBHYG58010   | <i>Habropoda</i>      | <i>Habropoda laboriosa</i>       |                           |
| BBHYG58110   | <i>Habropoda</i>      | <i>Habropoda laboriosa</i>       |                           |
| BBHYG58210   | <i>Habropoda</i>      | <i>Habropoda laboriosa</i>       |                           |
| BEECC22808   | <i>Habropoda</i>      | <i>Habropoda laboriosa</i>       |                           |
| BEECC54808   | <i>Habropoda</i>      | <i>Habropoda laboriosa</i>       |                           |
| GBAH1699419  | <i>Habropoda</i>      | <i>Habropoda laboriosa</i>       |                           |
| GBAH1643319  | <i>Habropoda</i>      | <i>Habropoda sinensis</i>        |                           |
| GBAH1643419  | <i>Habropoda</i>      | <i>Habropoda sinensis</i>        |                           |
| SDBEE08312   | <i>Habropoda</i>      | <i>Habropoda tristissima</i>     |                           |
| BUSA01105    | <i>Holcopasites</i>   | <i>Holcopasites arizonicus</i>   |                           |
| BEECA01706   | <i>Holcopasites</i>   | <i>Holcopasites calliopsidis</i> |                           |
| BEECA01806   | <i>Holcopasites</i>   | <i>Holcopasites calliopsidis</i> |                           |
| GBMNB6228220 | <i>Holcopasites</i>   | <i>Holcopasites calliopsidis</i> |                           |
| UPOLL65709   | <i>Holcopasites</i>   | <i>Holcopasites calliopsidis</i> |                           |
| BUSA06505    | <i>Holcopasites</i>   | <i>Holcopasites illinoiensis</i> |                           |
| BEECC18908   | <i>Holcopasites</i>   | <i>Holcopasites insoletus</i>    |                           |
| BOFTH45809   | <i>Homotrigona</i>    | <i>Homotrigona apicalis</i>      | <i>Tetrigona apicalis</i> |
| GBMIN7335517 | <i>Homotrigona</i>    | <i>Homotrigona vidua</i>         | <i>Tetrigona vidua</i>    |
| GBAH1679419  | <i>Hopliphora</i>     | <i>Hopliphora diabolica</i>      |                           |
| BOFTW11708   | <i>Hopliphora</i>     | <i>Hopliphora funereus</i>       |                           |
| GBAH1647819  | <i>Hopliphora</i>     | <i>Hopliphora funereus</i>       |                           |
| GBAH1677919  | <i>Hopliphora</i>     | <i>Hopliphora velutina</i>       |                           |
| GBMNB6247920 | <i>Hopliphora</i>     | <i>Hopliphora velutina</i>       |                           |
| BUSA00105    | <i>Isepeolus</i>      | <i>Isepeolus atripilis</i>       |                           |
| BUSA00205    | <i>Isepeolus</i>      | <i>Isepeolus luctuosus</i>       |                           |
| GBMNB6228820 | <i>Isepeolus</i>      | <i>Isepeolus vachali</i>         |                           |
| BEECA93207   | <i>Isepeolus</i>      | <i>Isepeolus wagenknechti</i>    |                           |
| BUSA00305    | <i>Isepeolus</i>      | <i>Isepeolus wagenknechti</i>    |                           |
| GBMNA2344419 | <i>Lanthanmelissa</i> | <i>Lanthanmelissa betinae</i>    |                           |
| GBMNA2344519 | <i>Lanthanmelissa</i> | <i>Lanthanmelissa betinae</i>    |                           |
| GBMNB6311320 | <i>Lanthanmelissa</i> | <i>Lanthanmelissa clementis</i>  |                           |
| GBMNA2344619 | <i>Lanthanmelissa</i> | <i>Lanthanmelissa discrepans</i> |                           |
| GBMNA2344819 | <i>Lanthanmelissa</i> | <i>Lanthanmelissa discrepans</i> |                           |
| GBMNA2345019 | <i>Lanthanmelissa</i> | <i>Lanthanmelissa discrepans</i> |                           |
| GBMNA2344219 | <i>Lanthanmelissa</i> | <i>Lanthanmelissa magaliae</i>   |                           |
| GBMNA2344319 | <i>Lanthanmelissa</i> | <i>Lanthanmelissa magaliae</i>   |                           |
| GBMNA2344719 | <i>Lanthanmelissa</i> | <i>Lanthanmelissa magaliae</i>   |                           |
| GBMNA2344919 | <i>Lanthanmelissa</i> | <i>Lanthanmelissa pampicola</i>  |                           |
| BBHYA96212   | <i>Leiopodus</i>      | <i>Leiopodus singularis</i>      |                           |
| BEECC55508   | <i>Leiopodus</i>      | <i>Leiopodus singularis</i>      |                           |
| GBMNB6251020 | <i>Leiopodus</i>      | <i>Leiopodus trochantericus</i>  |                           |
| GBMNA2455819 | <i>Lepidotrigona</i>  | <i>Lepidotrigona arcifera</i>    |                           |
| GBMNA2455919 | <i>Lepidotrigona</i>  | <i>Lepidotrigona arcifera</i>    |                           |

|              |                      |                                |
|--------------|----------------------|--------------------------------|
| GBMNA2456019 | <i>Lepidotrigona</i> | <i>Lepidotrigona arcifera</i>  |
| GBMNA2456119 | <i>Lepidotrigona</i> | <i>Lepidotrigona arcifera</i>  |
| GBMNA2456219 | <i>Lepidotrigona</i> | <i>Lepidotrigona arcifera</i>  |
| ASINH58512   | <i>Lestrimelitta</i> | <i>Lestrimelitta denuncia</i>  |
| ASINH58912   | <i>Lestrimelitta</i> | <i>Lestrimelitta denuncia</i>  |
| GBMIN3861813 | <i>Liotrigona</i>    | <i>Liotrigona bitika</i>       |
| GBMIN3861913 | <i>Liotrigona</i>    | <i>Liotrigona bitika</i>       |
| GBMIN3866513 | <i>Liotrigona</i>    | <i>Liotrigona bitika</i>       |
| GBMIN3866613 | <i>Liotrigona</i>    | <i>Liotrigona bitika</i>       |
| GBMIN3866713 | <i>Liotrigona</i>    | <i>Liotrigona bitika</i>       |
| GBMIN3860313 | <i>Liotrigona</i>    | <i>Liotrigona kinzelbachi</i>  |
| GBMIN3860413 | <i>Liotrigona</i>    | <i>Liotrigona kinzelbachi</i>  |
| GBMIN3860513 | <i>Liotrigona</i>    | <i>Liotrigona kinzelbachi</i>  |
| GBMIN3860613 | <i>Liotrigona</i>    | <i>Liotrigona kinzelbachi</i>  |
| GBMIN3860713 | <i>Liotrigona</i>    | <i>Liotrigona kinzelbachi</i>  |
| GBMIN3865113 | <i>Liotrigona</i>    | <i>Liotrigona kinzelbachi</i>  |
| GBMIN3865213 | <i>Liotrigona</i>    | <i>Liotrigona kinzelbachi</i>  |
| GBMIN3865313 | <i>Liotrigona</i>    | <i>Liotrigona kinzelbachi</i>  |
| GBMIN3865413 | <i>Liotrigona</i>    | <i>Liotrigona kinzelbachi</i>  |
| GBMIN3860813 | <i>Liotrigona</i>    | <i>Liotrigona madecassa</i>    |
| GBMIN3860913 | <i>Liotrigona</i>    | <i>Liotrigona madecassa</i>    |
| GBMIN3861013 | <i>Liotrigona</i>    | <i>Liotrigona madecassa</i>    |
| GBMIN3861113 | <i>Liotrigona</i>    | <i>Liotrigona madecassa</i>    |
| GBMIN3861213 | <i>Liotrigona</i>    | <i>Liotrigona madecassa</i>    |
| GBMIN3861313 | <i>Liotrigona</i>    | <i>Liotrigona madecassa</i>    |
| GBMIN3861413 | <i>Liotrigona</i>    | <i>Liotrigona madecassa</i>    |
| GBMIN3865513 | <i>Liotrigona</i>    | <i>Liotrigona madecassa</i>    |
| GBMIN3865613 | <i>Liotrigona</i>    | <i>Liotrigona madecassa</i>    |
| GBMIN3865713 | <i>Liotrigona</i>    | <i>Liotrigona madecassa</i>    |
| GBMIN3865813 | <i>Liotrigona</i>    | <i>Liotrigona madecassa</i>    |
| GBMIN3865913 | <i>Liotrigona</i>    | <i>Liotrigona madecassa</i>    |
| GBMIN3866013 | <i>Liotrigona</i>    | <i>Liotrigona madecassa</i>    |
| GBMIN3866113 | <i>Liotrigona</i>    | <i>Liotrigona madecassa</i>    |
| GBMIN3861513 | <i>Liotrigona</i>    | <i>Liotrigona mahafalya</i>    |
| GBMIN3861613 | <i>Liotrigona</i>    | <i>Liotrigona mahafalya</i>    |
| GBMIN3861713 | <i>Liotrigona</i>    | <i>Liotrigona mahafalya</i>    |
| GBMIN3866213 | <i>Liotrigona</i>    | <i>Liotrigona mahafalya</i>    |
| GBMIN3866313 | <i>Liotrigona</i>    | <i>Liotrigona mahafalya</i>    |
| GBMIN3866413 | <i>Liotrigona</i>    | <i>Liotrigona mahafalya</i>    |
| GBAH191306   | <i>Macrogalea</i>    | <i>Macrogalea antanosy</i>     |
| GBAH517809   | <i>Macrogalea</i>    | <i>Macrogalea berentyensis</i> |
| BOWGF12708   | <i>Macrogalea</i>    | <i>Macrogalea candida</i>      |
| GBHAP15613   | <i>Macrogalea</i>    | <i>Macrogalea candida</i>      |
| LASNA54408   | <i>Macrogalea</i>    | <i>Macrogalea candida</i>      |
| LASNA63908   | <i>Macrogalea</i>    | <i>Macrogalea candida</i>      |
| GBAH230607   | <i>Macrogalea</i>    | <i>Macrogalea ellioti</i>      |

|              |                   |                               |
|--------------|-------------------|-------------------------------|
| GBAH517909   | <i>Macrogalea</i> | <i>Macrogalea ellioti</i>     |
| GBAH517709   | <i>Macrogalea</i> | <i>Macrogalea infernalis</i>  |
| BOWGF14408   | <i>Macrogalea</i> | <i>Macrogalea mombasae</i>    |
| GBHAP15513   | <i>Macrogalea</i> | <i>Macrogalea mombasae</i>    |
| GBMNB6229520 | <i>Macrogalea</i> | <i>Macrogalea scaevolae</i>   |
| GBAH191206   | <i>Macrogalea</i> | <i>Macrogalea zanzibarica</i> |
| BEEEE15415   | <i>Melecta</i>    | <i>Melecta albifrons</i>      |
| BEEEE34216   | <i>Melecta</i>    | <i>Melecta albifrons</i>      |
| FBAPB42409   | <i>Melecta</i>    | <i>Melecta albifrons</i>      |
| FBAPB42509   | <i>Melecta</i>    | <i>Melecta albifrons</i>      |
| FBAPB64609   | <i>Melecta</i>    | <i>Melecta albifrons</i>      |
| FBAPC95011   | <i>Melecta</i>    | <i>Melecta albifrons</i>      |
| FBAPD09611   | <i>Melecta</i>    | <i>Melecta albifrons</i>      |
| FBHAP40409   | <i>Melecta</i>    | <i>Melecta albifrons</i>      |
| GBLGC01312   | <i>Melecta</i>    | <i>Melecta albifrons</i>      |
| GBLGC01412   | <i>Melecta</i>    | <i>Melecta albifrons</i>      |
| GBLGC01512   | <i>Melecta</i>    | <i>Melecta albifrons</i>      |
| GBLGC01612   | <i>Melecta</i>    | <i>Melecta albifrons</i>      |
| GBLGC01712   | <i>Melecta</i>    | <i>Melecta albifrons</i>      |
| GBMIN7183117 | <i>Melecta</i>    | <i>Melecta albifrons</i>      |
| GBMIN7183217 | <i>Melecta</i>    | <i>Melecta albifrons</i>      |
| GBMNB6250820 | <i>Melecta</i>    | <i>Melecta albifrons</i>      |
| BEECC86109   | <i>Melecta</i>    | <i>Melecta alexanderi</i>     |
| BEECC86209   | <i>Melecta</i>    | <i>Melecta alexanderi</i>     |
| BEECC86309   | <i>Melecta</i>    | <i>Melecta alexanderi</i>     |
| BEECC86409   | <i>Melecta</i>    | <i>Melecta alexanderi</i>     |
| FBAPB64709   | <i>Melecta</i>    | <i>Melecta luctuosa</i>       |
| FBAPC62011   | <i>Melecta</i>    | <i>Melecta luctuosa</i>       |
| FBAPC89111   | <i>Melecta</i>    | <i>Melecta luctuosa</i>       |
| FBAPC89211   | <i>Melecta</i>    | <i>Melecta luctuosa</i>       |
| FBAPC89311   | <i>Melecta</i>    | <i>Melecta luctuosa</i>       |
| FBAPC89411   | <i>Melecta</i>    | <i>Melecta luctuosa</i>       |
| FBAPD35711   | <i>Melecta</i>    | <i>Melecta luctuosa</i>       |
| FBAPD66311   | <i>Melecta</i>    | <i>Melecta luctuosa</i>       |
| FBAPD66411   | <i>Melecta</i>    | <i>Melecta luctuosa</i>       |
| FBAPD66511   | <i>Melecta</i>    | <i>Melecta luctuosa</i>       |
| GBLGC01812   | <i>Melecta</i>    | <i>Melecta luctuosa</i>       |
| GBLGC01912   | <i>Melecta</i>    | <i>Melecta luctuosa</i>       |
| BBHYG92610   | <i>Melecta</i>    | <i>Melecta pacifica</i>       |
| BBHYG92710   | <i>Melecta</i>    | <i>Melecta pacifica</i>       |
| BBHYG92810   | <i>Melecta</i>    | <i>Melecta pacifica</i>       |
| BEECB47707   | <i>Melecta</i>    | <i>Melecta pacifica</i>       |
| BEECC85809   | <i>Melecta</i>    | <i>Melecta pacifica</i>       |
| BEECC86009   | <i>Melecta</i>    | <i>Melecta pacifica</i>       |
| BEECC85909   | <i>Melecta</i>    | <i>Melecta separata</i>       |
| BEECC86509   | <i>Melecta</i>    | <i>Melecta separata</i>       |

|              |                    |                                |                              |
|--------------|--------------------|--------------------------------|------------------------------|
| BCII37910    | <i>Melecta</i>     | <i>Melecta thoracica</i>       |                              |
| BEECC75309   | <i>Melecta</i>     | <i>Melecta thoracica</i>       |                              |
| BEECC75409   | <i>Melecta</i>     | <i>Melecta thoracica</i>       |                              |
| GBMNB6250720 | <i>Melectoides</i> | <i>Melectoides bellus</i>      |                              |
| BOWGF22609   | <i>Melectoides</i> | <i>Melectoides triseriatus</i> |                              |
| BUSA00605    | <i>Melectoides</i> | <i>Melectoides triseriatus</i> |                              |
| GBAH613009   | <i>Melipona</i>    | <i>Melipona amazonica</i>      |                              |
| GBAH613909   | <i>Melipona</i>    | <i>Melipona asilvai</i>        |                              |
| ASINH61512   | <i>Melipona</i>    | <i>Melipona beecheii</i>       |                              |
| ASINH61612   | <i>Melipona</i>    | <i>Melipona beecheii</i>       |                              |
| BEECA75407   | <i>Melipona</i>    | <i>Melipona beecheii</i>       |                              |
| BEECA76807   | <i>Melipona</i>    | <i>Melipona beecheii</i>       |                              |
| BEECA76907   | <i>Melipona</i>    | <i>Melipona beecheii</i>       |                              |
| BEECB17807   | <i>Melipona</i>    | <i>Melipona beecheii</i>       |                              |
| GBAH616809   | <i>Melipona</i>    | <i>Melipona beecheii</i>       |                              |
| GBMNB6311420 | <i>Melipona</i>    | <i>Melipona beecheii</i>       |                              |
| GBAH039606   | <i>Melipona</i>    | <i>Melipona bicolor</i>        |                              |
| GBAH613809   | <i>Melipona</i>    | <i>Melipona bicolor</i>        |                              |
| GBHAP51214   | <i>Melipona</i>    | <i>Melipona bicolor</i>        |                              |
| GBHAP51314   | <i>Melipona</i>    | <i>Melipona bicolor</i>        |                              |
| GBHAP51414   | <i>Melipona</i>    | <i>Melipona bicolor</i>        |                              |
| GBHAP51514   | <i>Melipona</i>    | <i>Melipona bicolor</i>        |                              |
| GBHAP51614   | <i>Melipona</i>    | <i>Melipona bicolor</i>        |                              |
| GBHAP51714   | <i>Melipona</i>    | <i>Melipona bicolor</i>        |                              |
| GBHAP51814   | <i>Melipona</i>    | <i>Melipona bicolor</i>        |                              |
| GBMNA1675519 | <i>Melipona</i>    | <i>Melipona bicolor</i>        |                              |
| GBMTG33916   | <i>Melipona</i>    | <i>Melipona bicolor</i>        |                              |
| GBAH615309   | <i>Melipona</i>    | <i>Melipona captiosa</i>       |                              |
| GBAH1356519  | <i>Melipona</i>    | <i>Melipona colimana</i>       |                              |
| GBAH1356619  | <i>Melipona</i>    | <i>Melipona colimana</i>       |                              |
| GBMIN1260013 | <i>Melipona</i>    | <i>Melipona colimana</i>       |                              |
| GBAH615209   | <i>Melipona</i>    | <i>Melipona compressipes</i>   |                              |
| GBAH615809   | <i>Melipona</i>    | <i>Melipona compressipes</i>   |                              |
| GBAH616609   | <i>Melipona</i>    | <i>Melipona compressipes</i>   |                              |
| GBHAP51914   | <i>Melipona</i>    | <i>Melipona compressipes</i>   |                              |
| ASINH62912   | <i>Melipona</i>    | <i>Melipona costaricensis</i>  |                              |
| GBAH616509   | <i>Melipona</i>    | <i>Melipona costaricensis</i>  |                              |
| GBAH617309   | <i>Melipona</i>    | <i>Melipona costaricensis</i>  |                              |
| GBAH618109   | <i>Melipona</i>    | <i>Melipona costaricensis</i>  | <i>Melipona melanopleura</i> |
| DRBEE01207   | <i>Melipona</i>    | <i>Melipona crinita</i>        |                              |
| GBAH613209   | <i>Melipona</i>    | <i>Melipona crinita</i>        |                              |
| GBAH616109   | <i>Melipona</i>    | <i>Melipona crinita</i>        |                              |
| GBHAP52014   | <i>Melipona</i>    | <i>Melipona crinita</i>        |                              |
| GBAH1356819  | <i>Melipona</i>    | <i>Melipona fasciata</i>       |                              |
| GBAH1356919  | <i>Melipona</i>    | <i>Melipona fasciata</i>       |                              |
| GBAH1357019  | <i>Melipona</i>    | <i>Melipona fasciata</i>       |                              |

|             |                 |                                 |                           |
|-------------|-----------------|---------------------------------|---------------------------|
| GBAH1357119 | <i>Melipona</i> | <i>Melipona fasciata</i>        |                           |
| GBAH616709  | <i>Melipona</i> | <i>Melipona favosa</i>          |                           |
| GBAH1140615 | <i>Melipona</i> | <i>Melipona flavolineata</i>    |                           |
| GBAH1357219 | <i>Melipona</i> | <i>Melipona flavolineata</i>    |                           |
| GBAH1650219 | <i>Melipona</i> | <i>Melipona flavolineata</i>    |                           |
| ASINH63712  | <i>Melipona</i> | <i>Melipona fuliginosa</i>      |                           |
| ASINH63812  | <i>Melipona</i> | <i>Melipona fuliginosa</i>      |                           |
| ASINH63912  | <i>Melipona</i> | <i>Melipona fuliginosa</i>      |                           |
| ASINH64112  | <i>Melipona</i> | <i>Melipona fuliginosa</i>      |                           |
| DRBEE00107  | <i>Melipona</i> | <i>Melipona fuliginosa</i>      |                           |
| GBAH615409  | <i>Melipona</i> | <i>Melipona fuliginosa</i>      |                           |
| GBAH617509  | <i>Melipona</i> | <i>Melipona fuliginosa</i>      |                           |
| GBAH616909  | <i>Melipona</i> | <i>Melipona fulva</i>           |                           |
| GBAH1357319 | <i>Melipona</i> | <i>Melipona fuscopilosa</i>     |                           |
| GBAH612709  | <i>Melipona</i> | <i>Melipona grandis</i>         |                           |
| GBAH616409  | <i>Melipona</i> | <i>Melipona grandis</i>         |                           |
| GBAH617709  | <i>Melipona</i> | <i>Melipona grandis</i>         |                           |
| GBAH612909  | <i>Melipona</i> | <i>Melipona illota</i>          |                           |
| GBAH615009  | <i>Melipona</i> | <i>Melipona illustris</i>       |                           |
| GBAH615109  | <i>Melipona</i> | <i>Melipona lateralis</i>       |                           |
| GBAH614009  | <i>Melipona</i> | <i>Melipona mandacaia</i>       |                           |
| GBAH614309  | <i>Melipona</i> | <i>Melipona marginata</i>       |                           |
| GBAH615909  | <i>Melipona</i> | <i>Melipona melanoventer</i>    |                           |
| GBHAP52114  | <i>Melipona</i> | <i>Melipona melanoventer</i>    |                           |
| GBAH615609  | <i>Melipona</i> | <i>Melipona micheneri</i>       |                           |
| GBAH614909  | <i>Melipona</i> | <i>Melipona nebulosa</i>        |                           |
| GBAH615509  | <i>Melipona</i> | <i>Melipona ogilviei</i>        |                           |
| GBAH619809  | <i>Melipona</i> | <i>Melipona panamica</i>        |                           |
| GBAH614609  | <i>Melipona</i> | <i>Melipona quadrifasciata</i>  |                           |
| GBAH616309  | <i>Melipona</i> | <i>Melipona quadrifasciata</i>  |                           |
| GBHAP52214  | <i>Melipona</i> | <i>Melipona quadrifasciata</i>  |                           |
| GBHAP52314  | <i>Melipona</i> | <i>Melipona quadrifasciata</i>  |                           |
| GBHAP52414  | <i>Melipona</i> | <i>Melipona quadrifasciata</i>  |                           |
| GBAH614109  | <i>Melipona</i> | <i>Melipona quinquefasciata</i> |                           |
| GBAH614509  | <i>Melipona</i> | <i>Melipona rufiventris</i>     |                           |
| GBAH614709  | <i>Melipona</i> | <i>Melipona rufiventris</i>     |                           |
| GBAH616209  | <i>Melipona</i> | <i>Melipona rufiventris</i>     |                           |
| GBAH614409  | <i>Melipona</i> | <i>Melipona scutellaris</i>     |                           |
| GBHAP52514  | <i>Melipona</i> | <i>Melipona scutellaris</i>     |                           |
| GBMNA997219 | <i>Melipona</i> | <i>Melipona scutellaris</i>     |                           |
| GBMTG354316 | <i>Melipona</i> | <i>Melipona scutellaris</i>     |                           |
| GBAH1140715 | <i>Melipona</i> | <i>Melipona seminigra</i>       | <i>Melipona merrillae</i> |
| GBAH1140815 | <i>Melipona</i> | <i>Melipona seminigra</i>       | <i>Melipona merrillae</i> |
| GBAH1140915 | <i>Melipona</i> | <i>Melipona seminigra</i>       | <i>Melipona merrillae</i> |
| GBAH1141015 | <i>Melipona</i> | <i>Melipona seminigra</i>       | <i>Melipona merrillae</i> |
| GBAH1141115 | <i>Melipona</i> | <i>Melipona seminigra</i>       | <i>Melipona merrillae</i> |



|             |                 |                           |                           |
|-------------|-----------------|---------------------------|---------------------------|
| GBAH1141215 | <i>Melipona</i> | <i>Melipona seminigra</i> | <i>Melipona merrillae</i> |
| GBAH1141315 | <i>Melipona</i> | <i>Melipona seminigra</i> | <i>Melipona merrillae</i> |
| GBAH1141415 | <i>Melipona</i> | <i>Melipona seminigra</i> | <i>Melipona merrillae</i> |
| GBAH1141515 | <i>Melipona</i> | <i>Melipona seminigra</i> |                           |
| GBAH1141615 | <i>Melipona</i> | <i>Melipona seminigra</i> |                           |
| GBAH1141715 | <i>Melipona</i> | <i>Melipona seminigra</i> |                           |
| GBAH1141815 | <i>Melipona</i> | <i>Melipona seminigra</i> |                           |
| GBAH1141915 | <i>Melipona</i> | <i>Melipona seminigra</i> |                           |
| GBAH1142015 | <i>Melipona</i> | <i>Melipona seminigra</i> |                           |
| GBAH1142115 | <i>Melipona</i> | <i>Melipona seminigra</i> |                           |
| GBAH1142215 | <i>Melipona</i> | <i>Melipona seminigra</i> |                           |
| GBAH1142315 | <i>Melipona</i> | <i>Melipona seminigra</i> |                           |
| GBAH1142415 | <i>Melipona</i> | <i>Melipona seminigra</i> |                           |
| GBAH1142515 | <i>Melipona</i> | <i>Melipona seminigra</i> |                           |
| GBAH1142615 | <i>Melipona</i> | <i>Melipona seminigra</i> |                           |
| GBAH1142715 | <i>Melipona</i> | <i>Melipona seminigra</i> |                           |
| GBAH1142815 | <i>Melipona</i> | <i>Melipona seminigra</i> |                           |
| GBAH1142915 | <i>Melipona</i> | <i>Melipona seminigra</i> |                           |
| GBAH1143015 | <i>Melipona</i> | <i>Melipona seminigra</i> |                           |
| GBAH1143115 | <i>Melipona</i> | <i>Melipona seminigra</i> |                           |
| GBAH1143215 | <i>Melipona</i> | <i>Melipona seminigra</i> |                           |
| GBAH1143315 | <i>Melipona</i> | <i>Melipona seminigra</i> |                           |
| GBAH1143415 | <i>Melipona</i> | <i>Melipona seminigra</i> |                           |
| GBAH1143515 | <i>Melipona</i> | <i>Melipona seminigra</i> |                           |
| GBAH1143615 | <i>Melipona</i> | <i>Melipona seminigra</i> |                           |
| GBAH1143715 | <i>Melipona</i> | <i>Melipona seminigra</i> |                           |
| GBAH1143815 | <i>Melipona</i> | <i>Melipona seminigra</i> |                           |
| GBAH1143915 | <i>Melipona</i> | <i>Melipona seminigra</i> |                           |
| GBAH1144015 | <i>Melipona</i> | <i>Melipona seminigra</i> |                           |
| GBAH1144115 | <i>Melipona</i> | <i>Melipona seminigra</i> |                           |
| GBAH1144215 | <i>Melipona</i> | <i>Melipona seminigra</i> |                           |
| GBAH1144315 | <i>Melipona</i> | <i>Melipona seminigra</i> |                           |
| GBAH1144415 | <i>Melipona</i> | <i>Melipona seminigra</i> |                           |
| GBAH1144515 | <i>Melipona</i> | <i>Melipona seminigra</i> |                           |
| GBAH1144615 | <i>Melipona</i> | <i>Melipona seminigra</i> |                           |
| GBAH1144715 | <i>Melipona</i> | <i>Melipona seminigra</i> |                           |
| GBAH1144815 | <i>Melipona</i> | <i>Melipona seminigra</i> |                           |
| GBAH1144915 | <i>Melipona</i> | <i>Melipona seminigra</i> |                           |
| GBAH1145015 | <i>Melipona</i> | <i>Melipona seminigra</i> |                           |
| GBAH1145115 | <i>Melipona</i> | <i>Melipona seminigra</i> |                           |
| GBAH1145215 | <i>Melipona</i> | <i>Melipona seminigra</i> |                           |
| GBAH1145315 | <i>Melipona</i> | <i>Melipona seminigra</i> |                           |
| GBAH1145415 | <i>Melipona</i> | <i>Melipona seminigra</i> |                           |
| GBAH1145515 | <i>Melipona</i> | <i>Melipona seminigra</i> |                           |
| GBAH1145615 | <i>Melipona</i> | <i>Melipona seminigra</i> |                           |
| GBAH1145715 | <i>Melipona</i> | <i>Melipona seminigra</i> |                           |

|              |                   |                             |
|--------------|-------------------|-----------------------------|
| GBAH1145815  | <i>Melipona</i>   | <i>Melipona seminigra</i>   |
| GBAH1145915  | <i>Melipona</i>   | <i>Melipona seminigra</i>   |
| GBAH1146015  | <i>Melipona</i>   | <i>Melipona seminigra</i>   |
| GBAH1146115  | <i>Melipona</i>   | <i>Melipona seminigra</i>   |
| GBAH1146215  | <i>Melipona</i>   | <i>Melipona seminigra</i>   |
| GBAH1146315  | <i>Melipona</i>   | <i>Melipona seminigra</i>   |
| GBAH1146415  | <i>Melipona</i>   | <i>Melipona seminigra</i>   |
| GBAH1146515  | <i>Melipona</i>   | <i>Melipona seminigra</i>   |
| GBAH1146615  | <i>Melipona</i>   | <i>Melipona seminigra</i>   |
| GBAH1146715  | <i>Melipona</i>   | <i>Melipona seminigra</i>   |
| GBAH1146815  | <i>Melipona</i>   | <i>Melipona seminigra</i>   |
| GBAH1146915  | <i>Melipona</i>   | <i>Melipona seminigra</i>   |
| GBAH1147015  | <i>Melipona</i>   | <i>Melipona seminigra</i>   |
| GBAH1147115  | <i>Melipona</i>   | <i>Melipona seminigra</i>   |
| GBAH1147215  | <i>Melipona</i>   | <i>Melipona seminigra</i>   |
| GBAH1147315  | <i>Melipona</i>   | <i>Melipona seminigra</i>   |
| GBAH1147415  | <i>Melipona</i>   | <i>Melipona seminigra</i>   |
| GBAH1147515  | <i>Melipona</i>   | <i>Melipona seminigra</i>   |
| GBAH1147615  | <i>Melipona</i>   | <i>Melipona seminigra</i>   |
| GBAH1147715  | <i>Melipona</i>   | <i>Melipona seminigra</i>   |
| GBAH1147815  | <i>Melipona</i>   | <i>Melipona seminigra</i>   |
| GBAH1147915  | <i>Melipona</i>   | <i>Melipona seminigra</i>   |
| GBAH1148015  | <i>Melipona</i>   | <i>Melipona seminigra</i>   |
| GBAH615709   | <i>Melipona</i>   | <i>Melipona seminigra</i>   |
| GBHAP52614   | <i>Melipona</i>   | <i>Melipona seminigra</i>   |
| GBAH613609   | <i>Melipona</i>   | <i>Melipona solani</i>      |
| GBMNB6319620 | <i>Melipona</i>   | <i>Melipona solani</i>      |
| GMHDJ23913   | <i>Melipona</i>   | <i>Melipona solani</i>      |
| GBAH1372519  | <i>Melipona</i>   | <i>Melipona subnitida</i>   |
| GBAH1372619  | <i>Melipona</i>   | <i>Melipona subnitida</i>   |
| GBAH1372719  | <i>Melipona</i>   | <i>Melipona subnitida</i>   |
| GBAH1372819  | <i>Melipona</i>   | <i>Melipona subnitida</i>   |
| GBAH1372919  | <i>Melipona</i>   | <i>Melipona subnitida</i>   |
| GBAH1373019  | <i>Melipona</i>   | <i>Melipona subnitida</i>   |
| GBAH1373119  | <i>Melipona</i>   | <i>Melipona subnitida</i>   |
| GBAH1373219  | <i>Melipona</i>   | <i>Melipona subnitida</i>   |
| GBAH1373319  | <i>Melipona</i>   | <i>Melipona subnitida</i>   |
| GBAH1373419  | <i>Melipona</i>   | <i>Melipona subnitida</i>   |
| GBAH1373519  | <i>Melipona</i>   | <i>Melipona subnitida</i>   |
| GBAH1583319  | <i>Melipona</i>   | <i>Melipona subnitida</i>   |
| GBAH1583419  | <i>Melipona</i>   | <i>Melipona subnitida</i>   |
| GBAH1583519  | <i>Melipona</i>   | <i>Melipona subnitida</i>   |
| GBMIN7328317 | <i>Melipona</i>   | <i>Melipona subnitida</i>   |
| GBMIN7328417 | <i>Melipona</i>   | <i>Melipona subnitida</i>   |
| GBAH614209   | <i>Melipona</i>   | <i>Melipona triplaridis</i> |
| GBAH617609   | <i>Meliponula</i> | <i>Meliponula bocandei</i>  |

|               |                   |                               |                              |
|---------------|-------------------|-------------------------------|------------------------------|
| BEECC59209    | <i>Melissodes</i> | <i>Melissodes agilis</i>      |                              |
| BEECC59909    | <i>Melissodes</i> | <i>Melissodes agilis</i>      |                              |
| BEECC60009    | <i>Melissodes</i> | <i>Melissodes agilis</i>      |                              |
| GBMIN14274418 | <i>Melissodes</i> | <i>Melissodes agilis</i>      |                              |
| MNBEE07218    | <i>Melissodes</i> | <i>Melissodes agilis</i>      |                              |
| MNBEE07318    | <i>Melissodes</i> | <i>Melissodes agilis</i>      |                              |
| MNBEE07418    | <i>Melissodes</i> | <i>Melissodes agilis</i>      |                              |
| MNBEE07518    | <i>Melissodes</i> | <i>Melissodes agilis</i>      |                              |
| MNBEE07618    | <i>Melissodes</i> | <i>Melissodes agilis</i>      |                              |
| MNBEE07818    | <i>Melissodes</i> | <i>Melissodes agilis</i>      |                              |
| MNBEE07918    | <i>Melissodes</i> | <i>Melissodes agilis</i>      |                              |
| MNBEE08018    | <i>Melissodes</i> | <i>Melissodes agilis</i>      |                              |
| MNBEE08118    | <i>Melissodes</i> | <i>Melissodes agilis</i>      |                              |
| MNBEE15319    | <i>Melissodes</i> | <i>Melissodes agilis</i>      |                              |
| BEECC60109    | <i>Melissodes</i> | <i>Melissodes bicoloratus</i> | <i>Melissodes bicolorata</i> |
| BEECC60209    | <i>Melissodes</i> | <i>Melissodes bicoloratus</i> | <i>Melissodes bicolorata</i> |
| BBHYA130312   | <i>Melissodes</i> | <i>Melissodes bimaculatus</i> | <i>Melissodes bimaculata</i> |
| BBHYA85612    | <i>Melissodes</i> | <i>Melissodes bimaculatus</i> | <i>Melissodes bimaculata</i> |
| BEECA15106    | <i>Melissodes</i> | <i>Melissodes bimaculatus</i> | <i>Melissodes bimaculata</i> |
| BEECA15206    | <i>Melissodes</i> | <i>Melissodes bimaculatus</i> | <i>Melissodes bimaculata</i> |
| BEECA30706    | <i>Melissodes</i> | <i>Melissodes bimaculatus</i> | <i>Melissodes bimaculata</i> |
| BEECA35206    | <i>Melissodes</i> | <i>Melissodes bimaculatus</i> | <i>Melissodes bimaculata</i> |
| BEECA39306    | <i>Melissodes</i> | <i>Melissodes bimaculatus</i> | <i>Melissodes bimaculata</i> |
| GBMNA2183519  | <i>Melissodes</i> | <i>Melissodes bimaculatus</i> | <i>Melissodes bimaculata</i> |
| BEECC60509    | <i>Melissodes</i> | <i>Melissodes bimatrix</i>    |                              |
| BEECC60609    | <i>Melissodes</i> | <i>Melissodes bimatrix</i>    |                              |
| BEECC60709    | <i>Melissodes</i> | <i>Melissodes bimatrix</i>    |                              |
| BEECC50408    | <i>Melissodes</i> | <i>Melissodes boltoniae</i>   |                              |
| MNBEE00418    | <i>Melissodes</i> | <i>Melissodes boltoniae</i>   |                              |
| MNBEE01218    | <i>Melissodes</i> | <i>Melissodes boltoniae</i>   |                              |
| ORMEL01120    | <i>Melissodes</i> | <i>Melissodes clarkiae</i>    |                              |
| ORMEL01220    | <i>Melissodes</i> | <i>Melissodes clarkiae</i>    |                              |
| ORMEL01320    | <i>Melissodes</i> | <i>Melissodes clarkiae</i>    |                              |
| ORMEL01720    | <i>Melissodes</i> | <i>Melissodes clarkiae</i>    |                              |
| BBHYA87812    | <i>Melissodes</i> | <i>Melissodes communis</i>    |                              |
| BEECB57507    | <i>Melissodes</i> | <i>Melissodes communis</i>    |                              |
| BEECC25508    | <i>Melissodes</i> | <i>Melissodes communis</i>    |                              |
| BEECC54908    | <i>Melissodes</i> | <i>Melissodes communis</i>    |                              |
| BEECC59309    | <i>Melissodes</i> | <i>Melissodes communis</i>    |                              |
| BEECC59409    | <i>Melissodes</i> | <i>Melissodes communis</i>    |                              |
| GBMNA2183219  | <i>Melissodes</i> | <i>Melissodes communis</i>    |                              |
| MNBEE00518    | <i>Melissodes</i> | <i>Melissodes communis</i>    |                              |
| BBHYA411712   | <i>Melissodes</i> | <i>Melissodes comptoides</i>  |                              |
| BBHYA52312    | <i>Melissodes</i> | <i>Melissodes comptoides</i>  |                              |
| BBHYA87012    | <i>Melissodes</i> | <i>Melissodes comptoides</i>  |                              |
| MNBEE00618    | <i>Melissodes</i> | <i>Melissodes confusus</i>    |                              |

|               |                   |                                |                             |
|---------------|-------------------|--------------------------------|-----------------------------|
| MNBEE00718    | <i>Melissodes</i> | <i>Melissodes confusus</i>     |                             |
| BEECC65409    | <i>Melissodes</i> | <i>Melissodes dagosus</i>      | <i>Melissodes dagosa</i>    |
| BEECC65509    | <i>Melissodes</i> | <i>Melissodes dagosus</i>      | <i>Melissodes dagosa</i>    |
| BEECC65609    | <i>Melissodes</i> | <i>Melissodes dagosus</i>      | <i>Melissodes dagosa</i>    |
| BEECC65709    | <i>Melissodes</i> | <i>Melissodes dagosus</i>      | <i>Melissodes dagosa</i>    |
| ASGCB22113    | <i>Melissodes</i> | <i>Melissodes dentiventris</i> |                             |
| ASGCB22213    | <i>Melissodes</i> | <i>Melissodes dentiventris</i> |                             |
| MNBEE01318    | <i>Melissodes</i> | <i>Melissodes dentiventris</i> |                             |
| MNBEE01418    | <i>Melissodes</i> | <i>Melissodes dentiventris</i> |                             |
| BEECA38306    | <i>Melissodes</i> | <i>Melissodes desponsus</i>    | <i>Melissodes desponsa</i>  |
| BEECA39106    | <i>Melissodes</i> | <i>Melissodes desponsus</i>    | <i>Melissodes desponsa</i>  |
| BEECA39206    | <i>Melissodes</i> | <i>Melissodes desponsus</i>    | <i>Melissodes desponsa</i>  |
| BEECA58606    | <i>Melissodes</i> | <i>Melissodes desponsus</i>    | <i>Melissodes desponsa</i>  |
| BEEMH11106    | <i>Melissodes</i> | <i>Melissodes desponsus</i>    | <i>Melissodes desponsa</i>  |
| BEEMH12506    | <i>Melissodes</i> | <i>Melissodes desponsus</i>    | <i>Melissodes desponsa</i>  |
| DIAL28006     | <i>Melissodes</i> | <i>Melissodes desponsus</i>    | <i>Melissodes desponsa</i>  |
| GBMIN14274618 | <i>Melissodes</i> | <i>Melissodes desponsus</i>    | <i>Melissodes desponsa</i>  |
| GBMNB6184120  | <i>Melissodes</i> | <i>Melissodes desponsus</i>    | <i>Melissodes desponsa</i>  |
| HDBNS06903    | <i>Melissodes</i> | <i>Melissodes desponsus</i>    |                             |
| HDBNS07003    | <i>Melissodes</i> | <i>Melissodes desponsus</i>    |                             |
| MNBEE01518    | <i>Melissodes</i> | <i>Melissodes desponsus</i>    |                             |
| MNBEE01618    | <i>Melissodes</i> | <i>Melissodes desponsus</i>    |                             |
| MNBEE01718    | <i>Melissodes</i> | <i>Melissodes desponsus</i>    |                             |
| MNBEE01818    | <i>Melissodes</i> | <i>Melissodes desponsus</i>    |                             |
| MNBEE01918    | <i>Melissodes</i> | <i>Melissodes desponsus</i>    |                             |
| MNBEE02818    | <i>Melissodes</i> | <i>Melissodes desponsus</i>    |                             |
| MNBEE09719    | <i>Melissodes</i> | <i>Melissodes desponsus</i>    |                             |
| MNBEE10119    | <i>Melissodes</i> | <i>Melissodes desponsus</i>    |                             |
| MNBEE10919    | <i>Melissodes</i> | <i>Melissodes desponsus</i>    |                             |
| MNBEE11219    | <i>Melissodes</i> | <i>Melissodes desponsus</i>    |                             |
| MNBEE11719    | <i>Melissodes</i> | <i>Melissodes desponsus</i>    |                             |
| MNBEE12519    | <i>Melissodes</i> | <i>Melissodes desponsus</i>    |                             |
| MNBEE17819    | <i>Melissodes</i> | <i>Melissodes desponsus</i>    |                             |
| MNBEE18819    | <i>Melissodes</i> | <i>Melissodes desponsus</i>    |                             |
| UPOLB19409    | <i>Melissodes</i> | <i>Melissodes desponsus</i>    | <i>Melissodes desponsa</i>  |
| UPOLB21409    | <i>Melissodes</i> | <i>Melissodes desponsus</i>    | <i>Melissodes desponsa</i>  |
| UPOLB22609    | <i>Melissodes</i> | <i>Melissodes desponsus</i>    | <i>Melissodes desponsa</i>  |
| BBHEC16009    | <i>Melissodes</i> | <i>Melissodes druriellus</i>   | <i>Melissodes druriella</i> |
| BBHEC16109    | <i>Melissodes</i> | <i>Melissodes druriellus</i>   | <i>Melissodes druriella</i> |
| BBHEC16609    | <i>Melissodes</i> | <i>Melissodes druriellus</i>   | <i>Melissodes druriella</i> |
| BBHEC16709    | <i>Melissodes</i> | <i>Melissodes druriellus</i>   | <i>Melissodes druriella</i> |
| BBHEC16909    | <i>Melissodes</i> | <i>Melissodes druriellus</i>   | <i>Melissodes druriella</i> |
| BBHEC17009    | <i>Melissodes</i> | <i>Melissodes druriellus</i>   | <i>Melissodes druriella</i> |
| BBHEC17109    | <i>Melissodes</i> | <i>Melissodes druriellus</i>   | <i>Melissodes druriella</i> |
| BBHEC17209    | <i>Melissodes</i> | <i>Melissodes druriellus</i>   | <i>Melissodes druriella</i> |
| BBHEC17309    | <i>Melissodes</i> | <i>Melissodes druriellus</i>   | <i>Melissodes druriella</i> |

|               |                   |                              |                             |
|---------------|-------------------|------------------------------|-----------------------------|
| BBHEC56809    | <i>Melissodes</i> | <i>Melissodes druriellus</i> | <i>Melissodes druriella</i> |
| BEECA17406    | <i>Melissodes</i> | <i>Melissodes druriellus</i> | <i>Melissodes druriella</i> |
| BEECA17506    | <i>Melissodes</i> | <i>Melissodes druriellus</i> | <i>Melissodes druriella</i> |
| BEECA58806    | <i>Melissodes</i> | <i>Melissodes druriellus</i> | <i>Melissodes druriella</i> |
| BEECC62609    | <i>Melissodes</i> | <i>Melissodes druriellus</i> | <i>Melissodes druriella</i> |
| BEECC62809    | <i>Melissodes</i> | <i>Melissodes druriellus</i> | <i>Melissodes druriella</i> |
| CRHIB00615    | <i>Melissodes</i> | <i>Melissodes druriellus</i> | <i>Melissodes druriella</i> |
| DIAL30406     | <i>Melissodes</i> | <i>Melissodes druriellus</i> |                             |
| GBMIN14274518 | <i>Melissodes</i> | <i>Melissodes druriellus</i> | <i>Melissodes druriella</i> |
| HGPPH03410    | <i>Melissodes</i> | <i>Melissodes druriellus</i> | <i>Melissodes druriella</i> |
| MNBEE02018    | <i>Melissodes</i> | <i>Melissodes druriellus</i> |                             |
| MNBEE02118    | <i>Melissodes</i> | <i>Melissodes druriellus</i> |                             |
| MNBEE02218    | <i>Melissodes</i> | <i>Melissodes druriellus</i> |                             |
| MNBEE02318    | <i>Melissodes</i> | <i>Melissodes druriellus</i> |                             |
| MNBEE02418    | <i>Melissodes</i> | <i>Melissodes druriellus</i> |                             |
| MNBEE02518    | <i>Melissodes</i> | <i>Melissodes druriellus</i> |                             |
| MNBEE02618    | <i>Melissodes</i> | <i>Melissodes druriellus</i> |                             |
| MNBEE02718    | <i>Melissodes</i> | <i>Melissodes druriellus</i> |                             |
| RBINA502913   | <i>Melissodes</i> | <i>Melissodes druriellus</i> | <i>Melissodes druriella</i> |
| RBINA92713    | <i>Melissodes</i> | <i>Melissodes druriellus</i> | <i>Melissodes druriella</i> |
| RBINA93013    | <i>Melissodes</i> | <i>Melissodes druriellus</i> | <i>Melissodes druriella</i> |
| SMTPO467115   | <i>Melissodes</i> | <i>Melissodes druriellus</i> | <i>Melissodes druriella</i> |
| UPOLB16409    | <i>Melissodes</i> | <i>Melissodes druriellus</i> | <i>Melissodes druriella</i> |
| UPOLB22909    | <i>Melissodes</i> | <i>Melissodes druriellus</i> | <i>Melissodes druriella</i> |
| BEECC60809    | <i>Melissodes</i> | <i>Melissodes grindeliae</i> |                             |
| BEECC60909    | <i>Melissodes</i> | <i>Melissodes grindeliae</i> |                             |
| BEECC61009    | <i>Melissodes</i> | <i>Melissodes grindeliae</i> |                             |
| BEECB30407    | <i>Melissodes</i> | <i>Melissodes haitiensis</i> |                             |
| BEECB30507    | <i>Melissodes</i> | <i>Melissodes haitiensis</i> |                             |
| BEECA59106    | <i>Melissodes</i> | <i>Melissodes illatus</i>    | <i>Melissodes illata</i>    |
| DIAL23306     | <i>Melissodes</i> | <i>Melissodes illatus</i>    | <i>Melissodes illata</i>    |
| DIAL25406     | <i>Melissodes</i> | <i>Melissodes illatus</i>    | <i>Melissodes illata</i>    |
| DIAL27906     | <i>Melissodes</i> | <i>Melissodes illatus</i>    | <i>Melissodes illata</i>    |
| HDBNS07403    | <i>Melissodes</i> | <i>Melissodes illatus</i>    | <i>Melissodes illata</i>    |
| UPOLB25209    | <i>Melissodes</i> | <i>Melissodes illatus</i>    | <i>Melissodes illata</i>    |
| UPOLB25309    | <i>Melissodes</i> | <i>Melissodes illatus</i>    | <i>Melissodes illata</i>    |
| UPOLB25509    | <i>Melissodes</i> | <i>Melissodes illatus</i>    | <i>Melissodes illata</i>    |
| UPOLL41609    | <i>Melissodes</i> | <i>Melissodes illatus</i>    | <i>Melissodes illata</i>    |
| UPOLL41709    | <i>Melissodes</i> | <i>Melissodes illatus</i>    | <i>Melissodes illata</i>    |
| BEECB59407    | <i>Melissodes</i> | <i>Melissodes lupinus</i>    | <i>Melissodes lupina</i>    |
| BEECB88307    | <i>Melissodes</i> | <i>Melissodes lupinus</i>    | <i>Melissodes lupina</i>    |
| BEECC66209    | <i>Melissodes</i> | <i>Melissodes lupinus</i>    | <i>Melissodes lupina</i>    |
| ORMEL00520    | <i>Melissodes</i> | <i>Melissodes lupinus</i>    | <i>Melissodes lupina</i>    |
| ORMEL00620    | <i>Melissodes</i> | <i>Melissodes lupinus</i>    | <i>Melissodes lupina</i>    |
| ORMEL01420    | <i>Melissodes</i> | <i>Melissodes lupinus</i>    | <i>Melissodes lupina</i>    |
| ORMEL01520    | <i>Melissodes</i> | <i>Melissodes lupinus</i>    | <i>Melissodes lupina</i>    |

|             |                   |                                |                               |
|-------------|-------------------|--------------------------------|-------------------------------|
| ORMEL01620  | <i>Melissodes</i> | <i>Melissodes lupinus</i>      | <i>Melissodes lupina</i>      |
| ORMEL02120  | <i>Melissodes</i> | <i>Melissodes lupinus</i>      | <i>Melissodes lupina</i>      |
| ORMEL02820  | <i>Melissodes</i> | <i>Melissodes lupinus</i>      | <i>Melissodes lupina</i>      |
| ORMEL02920  | <i>Melissodes</i> | <i>Melissodes lupinus</i>      | <i>Melissodes lupina</i>      |
| BEECC61209  | <i>Melissodes</i> | <i>Melissodes lutulentus</i>   | <i>Melissodes lutulenta</i>   |
| BEECC61409  | <i>Melissodes</i> | <i>Melissodes lutulentus</i>   | <i>Melissodes lutulenta</i>   |
| BEECB68607  | <i>Melissodes</i> | <i>Melissodes menuachus</i>    |                               |
| BEECB68707  | <i>Melissodes</i> | <i>Melissodes menuachus</i>    |                               |
| BEECC61609  | <i>Melissodes</i> | <i>Melissodes menuachus</i>    |                               |
| BEECC61709  | <i>Melissodes</i> | <i>Melissodes menuachus</i>    |                               |
| MNBEE03318  | <i>Melissodes</i> | <i>Melissodes menuachus</i>    |                               |
| MNBEE06818  | <i>Melissodes</i> | <i>Melissodes menuachus</i>    |                               |
| ORMEL01820  | <i>Melissodes</i> | <i>Melissodes metenuus</i>     | <i>Melissodes metenua</i>     |
| BEECC65209  | <i>Melissodes</i> | <i>Melissodes microstictus</i> | <i>Melissodes microsticta</i> |
| BEECC65309  | <i>Melissodes</i> | <i>Melissodes microstictus</i> | <i>Melissodes microsticta</i> |
| ORMEL00220  | <i>Melissodes</i> | <i>Melissodes microstictus</i> | <i>Melissodes microsticta</i> |
| ORMEL00320  | <i>Melissodes</i> | <i>Melissodes microstictus</i> | <i>Melissodes microsticta</i> |
| ORMEL01920  | <i>Melissodes</i> | <i>Melissodes microstictus</i> | <i>Melissodes microsticta</i> |
| GBAH1853619 | <i>Melissodes</i> | <i>Melissodes nigroaeneus</i>  | <i>Melissodes nigroaenea</i>  |
| GBAH1853719 | <i>Melissodes</i> | <i>Melissodes nigroaeneus</i>  | <i>Melissodes nigroaenea</i>  |
| GBAH1853819 | <i>Melissodes</i> | <i>Melissodes nigroaeneus</i>  | <i>Melissodes nigroaenea</i>  |
| GBAH1853919 | <i>Melissodes</i> | <i>Melissodes nigroaeneus</i>  | <i>Melissodes nigroaenea</i>  |
| GBAH1854019 | <i>Melissodes</i> | <i>Melissodes nigroaeneus</i>  | <i>Melissodes nigroaenea</i>  |
| GBAH1854119 | <i>Melissodes</i> | <i>Melissodes nigroaeneus</i>  | <i>Melissodes nigroaenea</i>  |
| GBAH1854219 | <i>Melissodes</i> | <i>Melissodes nigroaeneus</i>  | <i>Melissodes nigroaenea</i>  |
| GBAH1854319 | <i>Melissodes</i> | <i>Melissodes nigroaeneus</i>  | <i>Melissodes nigroaenea</i>  |
| GBAH1854419 | <i>Melissodes</i> | <i>Melissodes nigroaeneus</i>  | <i>Melissodes nigroaenea</i>  |
| GBAH1854519 | <i>Melissodes</i> | <i>Melissodes nigroaeneus</i>  | <i>Melissodes nigroaenea</i>  |
| GBAH1854619 | <i>Melissodes</i> | <i>Melissodes nigroaeneus</i>  | <i>Melissodes nigroaenea</i>  |
| GBAH1854719 | <i>Melissodes</i> | <i>Melissodes nigroaeneus</i>  | <i>Melissodes nigroaenea</i>  |
| GBAH1854819 | <i>Melissodes</i> | <i>Melissodes nigroaeneus</i>  | <i>Melissodes nigroaenea</i>  |
| GBAH1854919 | <i>Melissodes</i> | <i>Melissodes nigroaeneus</i>  | <i>Melissodes nigroaenea</i>  |
| GBAH1855019 | <i>Melissodes</i> | <i>Melissodes nigroaeneus</i>  | <i>Melissodes nigroaenea</i>  |
| GBAH1855119 | <i>Melissodes</i> | <i>Melissodes nigroaeneus</i>  | <i>Melissodes nigroaenea</i>  |
| GBAH1855219 | <i>Melissodes</i> | <i>Melissodes nigroaeneus</i>  | <i>Melissodes nigroaenea</i>  |
| GBAH1855319 | <i>Melissodes</i> | <i>Melissodes nigroaeneus</i>  | <i>Melissodes nigroaenea</i>  |
| GBAH1855419 | <i>Melissodes</i> | <i>Melissodes nigroaeneus</i>  | <i>Melissodes nigroaenea</i>  |
| GBAH1855519 | <i>Melissodes</i> | <i>Melissodes nigroaeneus</i>  | <i>Melissodes nigroaenea</i>  |
| GBAH1855619 | <i>Melissodes</i> | <i>Melissodes nigroaeneus</i>  | <i>Melissodes nigroaenea</i>  |
| GBAH1855719 | <i>Melissodes</i> | <i>Melissodes nigroaeneus</i>  | <i>Melissodes nigroaenea</i>  |
| GBAH1855819 | <i>Melissodes</i> | <i>Melissodes nigroaeneus</i>  | <i>Melissodes nigroaenea</i>  |
| GBAH1855919 | <i>Melissodes</i> | <i>Melissodes nigroaeneus</i>  | <i>Melissodes nigroaenea</i>  |
| GBAH1856019 | <i>Melissodes</i> | <i>Melissodes nigroaeneus</i>  | <i>Melissodes nigroaenea</i>  |
| GBAH1856119 | <i>Melissodes</i> | <i>Melissodes nigroaeneus</i>  | <i>Melissodes nigroaenea</i>  |
| GBAH1856219 | <i>Melissodes</i> | <i>Melissodes nigroaeneus</i>  | <i>Melissodes nigroaenea</i>  |
| GBAH1856319 | <i>Melissodes</i> | <i>Melissodes nigroaeneus</i>  | <i>Melissodes nigroaenea</i>  |

|               |                   |                                   |                                  |
|---------------|-------------------|-----------------------------------|----------------------------------|
| GBAH1856419   | <i>Melissodes</i> | <i>Melissodes nigroaeneus</i>     | <i>Melissodes nigroaenea</i>     |
| GBAH1856519   | <i>Melissodes</i> | <i>Melissodes nigroaeneus</i>     | <i>Melissodes nigroaenea</i>     |
| GBAH1856619   | <i>Melissodes</i> | <i>Melissodes nigroaeneus</i>     | <i>Melissodes nigroaenea</i>     |
| GBMNA2972419  | <i>Melissodes</i> | <i>Melissodes nigroaeneus</i>     | <i>Melissodes nigroaenea</i>     |
| INRMA319315   | <i>Melissodes</i> | <i>Melissodes pallidisignatus</i> | <i>Melissodes pallidisignata</i> |
| MNBEE03418    | <i>Melissodes</i> | <i>Melissodes pallidisignatus</i> | <i>Melissodes pallidisignata</i> |
| GBMIN14274318 | <i>Melissodes</i> | <i>Melissodes paroselae</i>       |                                  |
| BEECC62209    | <i>Melissodes</i> | <i>Melissodes perlusus</i>        | <i>Melissodes perlusa</i>        |
| BEECC62409    | <i>Melissodes</i> | <i>Melissodes perpolitus</i>      | <i>Melissodes perpolita</i>      |
| BEECC62509    | <i>Melissodes</i> | <i>Melissodes perpolitus</i>      | <i>Melissodes perpolita</i>      |
| BEECC63009    | <i>Melissodes</i> | <i>Melissodes perpolitus</i>      | <i>Melissodes perpolita</i>      |
| BEECC63109    | <i>Melissodes</i> | <i>Melissodes perpolitus</i>      | <i>Melissodes perpolita</i>      |
| MNBEE03618    | <i>Melissodes</i> | <i>Melissodes rivalis</i>         |                                  |
| MNBEE03718    | <i>Melissodes</i> | <i>Melissodes rivalis</i>         |                                  |
| MNBEE03818    | <i>Melissodes</i> | <i>Melissodes rivalis</i>         |                                  |
| MNBEE03918    | <i>Melissodes</i> | <i>Melissodes rivalis</i>         |                                  |
| ORMEL00420    | <i>Melissodes</i> | <i>Melissodes rivalis</i>         |                                  |
| ORMEL02020    | <i>Melissodes</i> | <i>Melissodes rivalis</i>         |                                  |
| ORMEL00720    | <i>Melissodes</i> | <i>Melissodes robustior</i>       |                                  |
| ORMEL00820    | <i>Melissodes</i> | <i>Melissodes robustior</i>       |                                  |
| ORMEL00920    | <i>Melissodes</i> | <i>Melissodes robustior</i>       |                                  |
| ORMEL01020    | <i>Melissodes</i> | <i>Melissodes robustior</i>       |                                  |
| ORMEL02320    | <i>Melissodes</i> | <i>Melissodes robustior</i>       |                                  |
| ORMEL02420    | <i>Melissodes</i> | <i>Melissodes robustior</i>       |                                  |
| ORMEL02520    | <i>Melissodes</i> | <i>Melissodes robustior</i>       |                                  |
| ORMEL02620    | <i>Melissodes</i> | <i>Melissodes robustior</i>       |                                  |
| ORMEL02720    | <i>Melissodes</i> | <i>Melissodes robustior</i>       |                                  |
| ORMEL03020    | <i>Melissodes</i> | <i>Melissodes robustior</i>       |                                  |
| ORMEL03120    | <i>Melissodes</i> | <i>Melissodes robustior</i>       |                                  |
| ORMEL03220    | <i>Melissodes</i> | <i>Melissodes robustior</i>       |                                  |
| ORMEL03320    | <i>Melissodes</i> | <i>Melissodes robustior</i>       |                                  |
| ORMEL03420    | <i>Melissodes</i> | <i>Melissodes robustior</i>       |                                  |
| ORMEL03620    | <i>Melissodes</i> | <i>Melissodes robustior</i>       |                                  |
| BEECC63209    | <i>Melissodes</i> | <i>Melissodes saponellus</i>      |                                  |
| BEECC63309    | <i>Melissodes</i> | <i>Melissodes saponellus</i>      |                                  |
| BEECC63609    | <i>Melissodes</i> | <i>Melissodes semilupinus</i>     | <i>Melissodes semilupina</i>     |
| BEECC63709    | <i>Melissodes</i> | <i>Melissodes semilupinus</i>     | <i>Melissodes semilupina</i>     |
| BEECC63809    | <i>Melissodes</i> | <i>Melissodes semilupinus</i>     | <i>Melissodes semilupina</i>     |
| BEECC63909    | <i>Melissodes</i> | <i>Melissodes semilupinus</i>     | <i>Melissodes semilupina</i>     |
| BEECC114609   | <i>Melissodes</i> | <i>Melissodes snowii</i>          |                                  |
| MNBEE04018    | <i>Melissodes</i> | <i>Melissodes snowii</i>          |                                  |
| MNBEE04118    | <i>Melissodes</i> | <i>Melissodes subagilis</i>       |                                  |
| PIMA11219     | <i>Melissodes</i> | <i>Melissodes subagilis</i>       |                                  |
| BEECA58906    | <i>Melissodes</i> | <i>Melissodes subillatus</i>      | <i>Melissodes subillata</i>      |
| DIAL20206     | <i>Melissodes</i> | <i>Melissodes subillatus</i>      | <i>Melissodes subillata</i>      |
| MNBEE04218    | <i>Melissodes</i> | <i>Melissodes subillatus</i>      | <i>Melissodes subillata</i>      |

|              |                   |                                |                               |
|--------------|-------------------|--------------------------------|-------------------------------|
| MNBEE04518   | <i>Melissodes</i> | <i>Melissodes subillatus</i>   | <i>Melissodes subillata</i>   |
| MNBEE04618   | <i>Melissodes</i> | <i>Melissodes subillatus</i>   | <i>Melissodes subillata</i>   |
| MNBEE04718   | <i>Melissodes</i> | <i>Melissodes subillatus</i>   | <i>Melissodes subillata</i>   |
| LASNA52908   | <i>Melissodes</i> | <i>Melissodes tinctus</i>      | <i>Melissodes tincta</i>      |
| LASNA62408   | <i>Melissodes</i> | <i>Melissodes tinctus</i>      | <i>Melissodes tincta</i>      |
| BEECB30307   | <i>Melissodes</i> | <i>Melissodes trifasciatus</i> | <i>Melissodes trifasciata</i> |
| ASGCB22013   | <i>Melissodes</i> | <i>Melissodes trinodis</i>     |                               |
| GMMAD03515   | <i>Melissodes</i> | <i>Melissodes trinodis</i>     |                               |
| MNBEE00218   | <i>Melissodes</i> | <i>Melissodes trinodis</i>     |                               |
| MNBEE08218   | <i>Melissodes</i> | <i>Melissodes trinodis</i>     |                               |
| MNBEE08318   | <i>Melissodes</i> | <i>Melissodes trinodis</i>     |                               |
| MNBEE08418   | <i>Melissodes</i> | <i>Melissodes trinodis</i>     |                               |
| MNBEE16819   | <i>Melissodes</i> | <i>Melissodes trinodis</i>     |                               |
| BBHYA87712   | <i>Melissodes</i> | <i>Melissodes tristis</i>      |                               |
| BBHYA94312   | <i>Melissodes</i> | <i>Melissodes tristis</i>      |                               |
| BBHYA97412   | <i>Melissodes</i> | <i>Melissodes tristis</i>      |                               |
| BEECC64409   | <i>Melissodes</i> | <i>Melissodes tristis</i>      |                               |
| BEECC64509   | <i>Melissodes</i> | <i>Melissodes tristis</i>      |                               |
| PIMA11119    | <i>Melissodes</i> | <i>Melissodes tristis</i>      |                               |
| BEECC64909   | <i>Melissodes</i> | <i>Melissodes utahensis</i>    |                               |
| BEECC65009   | <i>Melissodes</i> | <i>Melissodes utahensis</i>    |                               |
| BEECC58509   | <i>Melissodes</i> | <i>Melissodes verbesinarum</i> |                               |
| BEECC58609   | <i>Melissodes</i> | <i>Melissodes verbesinarum</i> |                               |
| MNBEE05818   | <i>Melissodes</i> | <i>Melissodes wheeleri</i>     |                               |
| MNBEE05918   | <i>Melissodes</i> | <i>Melissodes wheeleri</i>     |                               |
| MNBEE06318   | <i>Melissodes</i> | <i>Melissodes wheeleri</i>     |                               |
| MNBEE06418   | <i>Melissodes</i> | <i>Melissodes wheeleri</i>     |                               |
| MNBEE06518   | <i>Melissodes</i> | <i>Melissodes wheeleri</i>     |                               |
| AVS00316     | <i>Melitoma</i>   | <i>Melitoma ameghinoi</i>      |                               |
| AVS01516     | <i>Melitoma</i>   | <i>Melitoma ameghinoi</i>      |                               |
| AVS02716     | <i>Melitoma</i>   | <i>Melitoma ameghinoi</i>      |                               |
| AVS03916     | <i>Melitoma</i>   | <i>Melitoma ameghinoi</i>      |                               |
| AVS05116     | <i>Melitoma</i>   | <i>Melitoma ameghinoi</i>      |                               |
| BOFWM27308   | <i>Melitoma</i>   | <i>Melitoma marginella</i>     |                               |
| GBAH195006   | <i>Melitoma</i>   | <i>Melitoma segmentaria</i>    |                               |
| BBHYA87212   | <i>Melitoma</i>   | <i>Melitoma taurea</i>         |                               |
| BBHYA87912   | <i>Melitoma</i>   | <i>Melitoma taurea</i>         |                               |
| BEECC38708   | <i>Melitoma</i>   | <i>Melitoma taurea</i>         |                               |
| BEECC38808   | <i>Melitoma</i>   | <i>Melitoma taurea</i>         |                               |
| BUSA15405    | <i>Melitoma</i>   | <i>Melitoma taurea</i>         |                               |
| GBMNA2183019 | <i>Melitoma</i>   | <i>Melitoma taurea</i>         |                               |
| SICOB66518   | <i>Melitoma</i>   | <i>Melitoma taurea</i>         |                               |
| SICOB66618   | <i>Melitoma</i>   | <i>Melitoma taurea</i>         |                               |
| SICOB67418   | <i>Mesoplia</i>   | <i>Mesoplia azurea</i>         |                               |
| GBAH1678119  | <i>Mesoplia</i>   | <i>Mesoplia insignis</i>       |                               |
| GBAH1665319  | <i>Mesoplia</i>   | <i>Mesoplia regalis</i>        |                               |



|              |                 |                            |
|--------------|-----------------|----------------------------|
| GBAH1677819  | <i>Mesoplia</i> | <i>Mesoplia rufipes</i>    |
| GBMNB6247820 | <i>Mesoplia</i> | <i>Mesoplia rufipes</i>    |
| GBAH1616219  | <i>Mourella</i> | <i>Mourella caerulea</i>   |
| GBAH1616319  | <i>Mourella</i> | <i>Mourella caerulea</i>   |
| GBAH1616419  | <i>Mourella</i> | <i>Mourella caerulea</i>   |
| GBAH1616519  | <i>Mourella</i> | <i>Mourella caerulea</i>   |
| GBAH1616619  | <i>Mourella</i> | <i>Mourella caerulea</i>   |
| GBAH1616719  | <i>Mourella</i> | <i>Mourella caerulea</i>   |
| GBAH1616819  | <i>Mourella</i> | <i>Mourella caerulea</i>   |
| GBAH1616919  | <i>Mourella</i> | <i>Mourella caerulea</i>   |
| GBAH1617019  | <i>Mourella</i> | <i>Mourella caerulea</i>   |
| GBAH1617119  | <i>Mourella</i> | <i>Mourella caerulea</i>   |
| GBAH1617219  | <i>Mourella</i> | <i>Mourella caerulea</i>   |
| GBAH1617319  | <i>Mourella</i> | <i>Mourella caerulea</i>   |
| GBAH1617419  | <i>Mourella</i> | <i>Mourella caerulea</i>   |
| GBAH1617519  | <i>Mourella</i> | <i>Mourella caerulea</i>   |
| GBAH1617619  | <i>Mourella</i> | <i>Mourella caerulea</i>   |
| GBAH1617719  | <i>Mourella</i> | <i>Mourella caerulea</i>   |
| GBAH1617819  | <i>Mourella</i> | <i>Mourella caerulea</i>   |
| GBAH1617919  | <i>Mourella</i> | <i>Mourella caerulea</i>   |
| GBAH1618019  | <i>Mourella</i> | <i>Mourella caerulea</i>   |
| GBAH1618119  | <i>Mourella</i> | <i>Mourella caerulea</i>   |
| GBAH1618219  | <i>Mourella</i> | <i>Mourella caerulea</i>   |
| GBAH1618319  | <i>Mourella</i> | <i>Mourella caerulea</i>   |
| GBAH1618419  | <i>Mourella</i> | <i>Mourella caerulea</i>   |
| GBAH1618519  | <i>Mourella</i> | <i>Mourella caerulea</i>   |
| GBAH1618619  | <i>Mourella</i> | <i>Mourella caerulea</i>   |
| GBAH1618719  | <i>Mourella</i> | <i>Mourella caerulea</i>   |
| GBAH1618819  | <i>Mourella</i> | <i>Mourella caerulea</i>   |
| GBAH1618919  | <i>Mourella</i> | <i>Mourella caerulea</i>   |
| GBAH1619019  | <i>Mourella</i> | <i>Mourella caerulea</i>   |
| GBAH1619119  | <i>Mourella</i> | <i>Mourella caerulea</i>   |
| GBAH1619219  | <i>Mourella</i> | <i>Mourella caerulea</i>   |
| GBAH1619319  | <i>Mourella</i> | <i>Mourella caerulea</i>   |
| GBAH1619419  | <i>Mourella</i> | <i>Mourella caerulea</i>   |
| GBMNB6187820 | <i>Neolarra</i> | <i>Neolarra orbiculata</i> |
| BEECB80507   | <i>Neolarra</i> | <i>Neolarra vigilans</i>   |
| BEECB80607   | <i>Neolarra</i> | <i>Neolarra vigilans</i>   |
| BCHYM150813  | <i>Nomada</i>   | <i>Nomada alboguttata</i>  |
| BEECA25506   | <i>Nomada</i>   | <i>Nomada alboguttata</i>  |
| BEECA60806   | <i>Nomada</i>   | <i>Nomada alboguttata</i>  |
| BEECA61106   | <i>Nomada</i>   | <i>Nomada alboguttata</i>  |
| BEECC34308   | <i>Nomada</i>   | <i>Nomada alboguttata</i>  |
| BEECC34408   | <i>Nomada</i>   | <i>Nomada alboguttata</i>  |
| FBAPB12909   | <i>Nomada</i>   | <i>Nomada alboguttata</i>  |
| FBAPB13009   | <i>Nomada</i>   | <i>Nomada alboguttata</i>  |

|             |               |                               |
|-------------|---------------|-------------------------------|
| FBAPC12610  | <i>Nomada</i> | <i>Nomada alboguttata</i>     |
| FBAPC51511  | <i>Nomada</i> | <i>Nomada alboguttata</i>     |
| FBAPC51811  | <i>Nomada</i> | <i>Nomada alboguttata</i>     |
| FBAPC51911  | <i>Nomada</i> | <i>Nomada alboguttata</i>     |
| GBACU379813 | <i>Nomada</i> | <i>Nomada alboguttata</i>     |
| BOFTW00308  | <i>Nomada</i> | <i>Nomada argapa</i>          |
| FBAPB13109  | <i>Nomada</i> | <i>Nomada argentata</i>       |
| FBAPD71511  | <i>Nomada</i> | <i>Nomada argentata</i>       |
| FBAPD71611  | <i>Nomada</i> | <i>Nomada argentata</i>       |
| FBAPB13409  | <i>Nomada</i> | <i>Nomada armata</i>          |
| FBAPC16210  | <i>Nomada</i> | <i>Nomada armata</i>          |
| FBHAP63909  | <i>Nomada</i> | <i>Nomada armata</i>          |
| GBAH1856719 | <i>Nomada</i> | <i>Nomada armata</i>          |
| GBCOU20513  | <i>Nomada</i> | <i>Nomada armata</i>          |
| BEECC33408  | <i>Nomada</i> | <i>Nomada armatella</i>       |
| BEECC33508  | <i>Nomada</i> | <i>Nomada armatella</i>       |
| BEECC33608  | <i>Nomada</i> | <i>Nomada armatella</i>       |
| BEECA57806  | <i>Nomada</i> | <i>Nomada articulata</i>      |
| BEECA57906  | <i>Nomada</i> | <i>Nomada articulata</i>      |
| BEECA58006  | <i>Nomada</i> | <i>Nomada articulata</i>      |
| BEECA58106  | <i>Nomada</i> | <i>Nomada articulata</i>      |
| BEO07304    | <i>Nomada</i> | <i>Nomada articulata</i>      |
| BUSA11905   | <i>Nomada</i> | <i>Nomada articulata</i>      |
| HDBNS10103  | <i>Nomada</i> | <i>Nomada articulata</i>      |
| HDBNS10203  | <i>Nomada</i> | <i>Nomada articulata</i>      |
| UPOLB58709  | <i>Nomada</i> | <i>Nomada articulata</i>      |
| UPOLB60409  | <i>Nomada</i> | <i>Nomada articulata</i>      |
| FBAPC14510  | <i>Nomada</i> | <i>Nomada atroscutellaris</i> |
| FBAPC14610  | <i>Nomada</i> | <i>Nomada atroscutellaris</i> |
| FBHAP40909  | <i>Nomada</i> | <i>Nomada atroscutellaris</i> |
| HYQT05708   | <i>Nomada</i> | <i>Nomada australensis</i>    |
| HYQT06008   | <i>Nomada</i> | <i>Nomada australensis</i>    |
| HYQT06108   | <i>Nomada</i> | <i>Nomada australensis</i>    |
| HYQT06208   | <i>Nomada</i> | <i>Nomada australensis</i>    |
| HYQT17708   | <i>Nomada</i> | <i>Nomada australensis</i>    |
| HYQT25709   | <i>Nomada</i> | <i>Nomada australensis</i>    |
| HYQT84911   | <i>Nomada</i> | <i>Nomada australensis</i>    |
| HYQT85211   | <i>Nomada</i> | <i>Nomada australensis</i>    |
| HYQTB19112  | <i>Nomada</i> | <i>Nomada australensis</i>    |
| HYQTB20812  | <i>Nomada</i> | <i>Nomada australensis</i>    |
| HYQTB28412  | <i>Nomada</i> | <i>Nomada australensis</i>    |
| BEECA05406  | <i>Nomada</i> | <i>Nomada australis</i>       |
| BEECA05506  | <i>Nomada</i> | <i>Nomada australis</i>       |
| BEECA05606  | <i>Nomada</i> | <i>Nomada australis</i>       |
| BEECA62906  | <i>Nomada</i> | <i>Nomada bella</i>           |
| ELPCG237817 | <i>Nomada</i> | <i>Nomada bella</i>           |

|              |               |                          |
|--------------|---------------|--------------------------|
| HCBNS09403   | <i>Nomada</i> | <i>Nomada bella</i>      |
| HDBNS14303   | <i>Nomada</i> | <i>Nomada bella</i>      |
| HDBNS14503   | <i>Nomada</i> | <i>Nomada bella</i>      |
| RRMFA25715   | <i>Nomada</i> | <i>Nomada bella</i>      |
| SMTPB1127013 | <i>Nomada</i> | <i>Nomada bella</i>      |
| BEECA45906   | <i>Nomada</i> | <i>Nomada bethunei</i>   |
| BEECA56906   | <i>Nomada</i> | <i>Nomada bethunei</i>   |
| GBHAP04213   | <i>Nomada</i> | <i>Nomada bethunei</i>   |
| GBHAP04313   | <i>Nomada</i> | <i>Nomada bethunei</i>   |
| GBHAP04413   | <i>Nomada</i> | <i>Nomada bethunei</i>   |
| GBHAP04513   | <i>Nomada</i> | <i>Nomada bethunei</i>   |
| GBHAP04613   | <i>Nomada</i> | <i>Nomada bethunei</i>   |
| UPOLB80109   | <i>Nomada</i> | <i>Nomada bethunei</i>   |
| UPOLB83709   | <i>Nomada</i> | <i>Nomada bethunei</i>   |
| UPOLB85409   | <i>Nomada</i> | <i>Nomada bethunei</i>   |
| ABEE15417    | <i>Nomada</i> | <i>Nomada bifasciata</i> |
| FBAPB13809   | <i>Nomada</i> | <i>Nomada bifasciata</i> |
| FBAPB13909   | <i>Nomada</i> | <i>Nomada bifasciata</i> |
| FBAPB14009   | <i>Nomada</i> | <i>Nomada bifasciata</i> |
| FBAPB18409   | <i>Nomada</i> | <i>Nomada bifasciata</i> |
| FBAPC15510   | <i>Nomada</i> | <i>Nomada bifasciata</i> |
| FBHAP43009   | <i>Nomada</i> | <i>Nomada bifasciata</i> |
| GBACU165512  | <i>Nomada</i> | <i>Nomada bifasciata</i> |
| GBACU200112  | <i>Nomada</i> | <i>Nomada bifasciata</i> |
| GBACU200212  | <i>Nomada</i> | <i>Nomada bifasciata</i> |
| GBAH1856819  | <i>Nomada</i> | <i>Nomada bifasciata</i> |
| GBSYM231813  | <i>Nomada</i> | <i>Nomada bifasciata</i> |
| GMGMH144114  | <i>Nomada</i> | <i>Nomada bifasciata</i> |
| POLLE162819  | <i>Nomada</i> | <i>Nomada bifasciata</i> |
| ABEE06917    | <i>Nomada</i> | <i>Nomada bluethgeni</i> |
| FBAPB18509   | <i>Nomada</i> | <i>Nomada bluethgeni</i> |
| FBAPB18609   | <i>Nomada</i> | <i>Nomada castellana</i> |
| FBAPC15210   | <i>Nomada</i> | <i>Nomada castellana</i> |
| FBHAP42409   | <i>Nomada</i> | <i>Nomada castellana</i> |
| GBACU05412   | <i>Nomada</i> | <i>Nomada castellana</i> |
| GBACU83412   | <i>Nomada</i> | <i>Nomada castellana</i> |
| FBAPB18809   | <i>Nomada</i> | <i>Nomada conjungens</i> |
| FBAPB18909   | <i>Nomada</i> | <i>Nomada conjungens</i> |
| FBAPC14710   | <i>Nomada</i> | <i>Nomada conjungens</i> |
| FBHAP41209   | <i>Nomada</i> | <i>Nomada conjungens</i> |
| FBHAP41309   | <i>Nomada</i> | <i>Nomada conjungens</i> |
| BEECB05607   | <i>Nomada</i> | <i>Nomada cressonii</i>  |
| BEO02604     | <i>Nomada</i> | <i>Nomada cressonii</i>  |
| ELPCG237217  | <i>Nomada</i> | <i>Nomada cressonii</i>  |
| ELPCG237717  | <i>Nomada</i> | <i>Nomada cressonii</i>  |
| ELPCG238417  | <i>Nomada</i> | <i>Nomada cressonii</i>  |

|              |               |                            |
|--------------|---------------|----------------------------|
| ELPCG238517  | <i>Nomada</i> | <i>Nomada cressonii</i>    |
| HCBNS09103   | <i>Nomada</i> | <i>Nomada cressonii</i>    |
| HCBNS09303   | <i>Nomada</i> | <i>Nomada cressonii</i>    |
| HDBNS22104   | <i>Nomada</i> | <i>Nomada cressonii</i>    |
| JSHYM27211   | <i>Nomada</i> | <i>Nomada cressonii</i>    |
| JSHYM46611   | <i>Nomada</i> | <i>Nomada cressonii</i>    |
| DIAL21406    | <i>Nomada</i> | <i>Nomada cubensis</i>     |
| DIAL21606    | <i>Nomada</i> | <i>Nomada cubensis</i>     |
| BEECB79407   | <i>Nomada</i> | <i>Nomada cuneata</i>      |
| BEECC34008   | <i>Nomada</i> | <i>Nomada cuneata</i>      |
| BEECC34108   | <i>Nomada</i> | <i>Nomada cuneata</i>      |
| SSROA34714   | <i>Nomada</i> | <i>Nomada cuneata</i>      |
| TTHYW09708   | <i>Nomada</i> | <i>Nomada cuneata</i>      |
| HDBNS11003   | <i>Nomada</i> | <i>Nomada dentariae</i>    |
| BUSA38905    | <i>Nomada</i> | <i>Nomada denticulata</i>  |
| SMTPB1992313 | <i>Nomada</i> | <i>Nomada denticulata</i>  |
| UPOLB50209   | <i>Nomada</i> | <i>Nomada denticulata</i>  |
| UPOLB55709   | <i>Nomada</i> | <i>Nomada denticulata</i>  |
| UPOLB56609   | <i>Nomada</i> | <i>Nomada denticulata</i>  |
| UPOLB77909   | <i>Nomada</i> | <i>Nomada denticulata</i>  |
| UPOLB83809   | <i>Nomada</i> | <i>Nomada denticulata</i>  |
| BBHEC09509   | <i>Nomada</i> | <i>Nomada depressa</i>     |
| BBHYL40010   | <i>Nomada</i> | <i>Nomada depressa</i>     |
| BBHYL40310   | <i>Nomada</i> | <i>Nomada depressa</i>     |
| BEECA46006   | <i>Nomada</i> | <i>Nomada depressa</i>     |
| BEECA56506   | <i>Nomada</i> | <i>Nomada depressa</i>     |
| BEECC33908   | <i>Nomada</i> | <i>Nomada depressa</i>     |
| HDBNS10903   | <i>Nomada</i> | <i>Nomada depressa</i>     |
| SMTPB1992213 | <i>Nomada</i> | <i>Nomada depressa</i>     |
| UPOLB76209   | <i>Nomada</i> | <i>Nomada depressa</i>     |
| FBAPB19009   | <i>Nomada</i> | <i>Nomada distinguenda</i> |
| FBAPB19109   | <i>Nomada</i> | <i>Nomada distinguenda</i> |
| FBAPB19209   | <i>Nomada</i> | <i>Nomada distinguenda</i> |
| FBAPB19309   | <i>Nomada</i> | <i>Nomada distinguenda</i> |
| FBAPD74411   | <i>Nomada</i> | <i>Nomada distinguenda</i> |
| GBACU351113  | <i>Nomada</i> | <i>Nomada distinguenda</i> |
| GBACU351213  | <i>Nomada</i> | <i>Nomada distinguenda</i> |
| GBACU359613  | <i>Nomada</i> | <i>Nomada distinguenda</i> |
| GMBUE61114   | <i>Nomada</i> | <i>Nomada distinguenda</i> |
| GMBUE79614   | <i>Nomada</i> | <i>Nomada distinguenda</i> |
| FBAPB19409   | <i>Nomada</i> | <i>Nomada emarginata</i>   |
| FBAPB19509   | <i>Nomada</i> | <i>Nomada emarginata</i>   |
| FBAPD71311   | <i>Nomada</i> | <i>Nomada emarginata</i>   |
| ABEE07017    | <i>Nomada</i> | <i>Nomada fabriciana</i>   |
| ABEE07117    | <i>Nomada</i> | <i>Nomada fabriciana</i>   |
| BEEEE06315   | <i>Nomada</i> | <i>Nomada fabriciana</i>   |

|             |               |                           |
|-------------|---------------|---------------------------|
| BEEEE20315  | <i>Nomada</i> | <i>Nomada fabriciana</i>  |
| BEEEE32816  | <i>Nomada</i> | <i>Nomada fabriciana</i>  |
| FBAPB19709  | <i>Nomada</i> | <i>Nomada fabriciana</i>  |
| FBAPC15910  | <i>Nomada</i> | <i>Nomada fabriciana</i>  |
| FBAPC16010  | <i>Nomada</i> | <i>Nomada fabriciana</i>  |
| FBAPD18811  | <i>Nomada</i> | <i>Nomada fabriciana</i>  |
| FBAPD18911  | <i>Nomada</i> | <i>Nomada fabriciana</i>  |
| FBHAP41409  | <i>Nomada</i> | <i>Nomada fabriciana</i>  |
| FBHAP41509  | <i>Nomada</i> | <i>Nomada fabriciana</i>  |
| FBHAP41609  | <i>Nomada</i> | <i>Nomada fabriciana</i>  |
| GBAH1649419 | <i>Nomada</i> | <i>Nomada fabriciana</i>  |
| GBAH1740619 | <i>Nomada</i> | <i>Nomada fabriciana</i>  |
| GMGMA44614  | <i>Nomada</i> | <i>Nomada fabriciana</i>  |
| GMGMG29614  | <i>Nomada</i> | <i>Nomada fabriciana</i>  |
| GMGMG50314  | <i>Nomada</i> | <i>Nomada fabriciana</i>  |
| GMGMK109414 | <i>Nomada</i> | <i>Nomada fabriciana</i>  |
| IBBP15110   | <i>Nomada</i> | <i>Nomada fabriciana</i>  |
| IBBP15210   | <i>Nomada</i> | <i>Nomada fabriciana</i>  |
| POLLE203619 | <i>Nomada</i> | <i>Nomada fabriciana</i>  |
| POLLE203719 | <i>Nomada</i> | <i>Nomada fabriciana</i>  |
| POLLE209419 | <i>Nomada</i> | <i>Nomada fabriciana</i>  |
| FBAPB19809  | <i>Nomada</i> | <i>Nomada facilis</i>     |
| FBAPB19909  | <i>Nomada</i> | <i>Nomada facilis</i>     |
| FBAPB20009  | <i>Nomada</i> | <i>Nomada facilis</i>     |
| FBAPC12110  | <i>Nomada</i> | <i>Nomada facilis</i>     |
| GMBUB09714  | <i>Nomada</i> | <i>Nomada facilis</i>     |
| FBAPB20209  | <i>Nomada</i> | <i>Nomada femoralis</i>   |
| FBAPB20309  | <i>Nomada</i> | <i>Nomada femoralis</i>   |
| GBACU165112 | <i>Nomada</i> | <i>Nomada femoralis</i>   |
| FBAPB20609  | <i>Nomada</i> | <i>Nomada ferruginata</i> |
| FBAPC51411  | <i>Nomada</i> | <i>Nomada ferruginata</i> |
| FBAPD21711  | <i>Nomada</i> | <i>Nomada ferruginata</i> |
| FBAPD21811  | <i>Nomada</i> | <i>Nomada ferruginata</i> |
| FBAPD75911  | <i>Nomada</i> | <i>Nomada ferruginata</i> |
| FBAPD76011  | <i>Nomada</i> | <i>Nomada ferruginata</i> |
| FBHAP41709  | <i>Nomada</i> | <i>Nomada ferruginata</i> |
| FBHAP41809  | <i>Nomada</i> | <i>Nomada ferruginata</i> |
| POLLE203819 | <i>Nomada</i> | <i>Nomada ferruginata</i> |
| CNPPF122712 | <i>Nomada</i> | <i>Nomada fervida</i>     |
| GBHAP03413  | <i>Nomada</i> | <i>Nomada fervida</i>     |
| GBHAP03513  | <i>Nomada</i> | <i>Nomada fervida</i>     |
| GBHAP03613  | <i>Nomada</i> | <i>Nomada fervida</i>     |
| GBHAP03713  | <i>Nomada</i> | <i>Nomada fervida</i>     |
| GBHAP03813  | <i>Nomada</i> | <i>Nomada fervida</i>     |
| GBHAP03913  | <i>Nomada</i> | <i>Nomada fervida</i>     |
| BEEEE06415  | <i>Nomada</i> | <i>Nomada flava</i>       |

|              |               |                            |
|--------------|---------------|----------------------------|
| BEEEE17015   | <i>Nomada</i> | <i>Nomada flava</i>        |
| BEEEE27016   | <i>Nomada</i> | <i>Nomada flava</i>        |
| BEEEE34916   | <i>Nomada</i> | <i>Nomada flava</i>        |
| FBAPC15710   | <i>Nomada</i> | <i>Nomada flava</i>        |
| FBAPD18211   | <i>Nomada</i> | <i>Nomada flava</i>        |
| FBAPD18311   | <i>Nomada</i> | <i>Nomada flava</i>        |
| FBHAP41909   | <i>Nomada</i> | <i>Nomada flava</i>        |
| FBHAP42009   | <i>Nomada</i> | <i>Nomada flava</i>        |
| FBHAP42109   | <i>Nomada</i> | <i>Nomada flava</i>        |
| FBHAP42209   | <i>Nomada</i> | <i>Nomada flava</i>        |
| FBHAP44909   | <i>Nomada</i> | <i>Nomada flava</i>        |
| GBACU202212  | <i>Nomada</i> | <i>Nomada flava</i>        |
| GBACU83512   | <i>Nomada</i> | <i>Nomada flava</i>        |
| GBACU83612   | <i>Nomada</i> | <i>Nomada flava</i>        |
| GBACU83712   | <i>Nomada</i> | <i>Nomada flava</i>        |
| GBACU83812   | <i>Nomada</i> | <i>Nomada flava</i>        |
| GBAH1740719  | <i>Nomada</i> | <i>Nomada flava</i>        |
| BEEEE06515   | <i>Nomada</i> | <i>Nomada flavoguttata</i> |
| BEEEE21115   | <i>Nomada</i> | <i>Nomada flavoguttata</i> |
| BEEEE22715   | <i>Nomada</i> | <i>Nomada flavoguttata</i> |
| BEEEE22815   | <i>Nomada</i> | <i>Nomada flavoguttata</i> |
| BEEEE28116   | <i>Nomada</i> | <i>Nomada flavoguttata</i> |
| FBAPC13510   | <i>Nomada</i> | <i>Nomada flavoguttata</i> |
| FBAPC13610   | <i>Nomada</i> | <i>Nomada flavoguttata</i> |
| FBAPC13710   | <i>Nomada</i> | <i>Nomada flavoguttata</i> |
| FBAPD19011   | <i>Nomada</i> | <i>Nomada flavoguttata</i> |
| FBHAP42309   | <i>Nomada</i> | <i>Nomada flavoguttata</i> |
| FBHAP42509   | <i>Nomada</i> | <i>Nomada flavoguttata</i> |
| FBHAP42609   | <i>Nomada</i> | <i>Nomada flavoguttata</i> |
| GBACU202312  | <i>Nomada</i> | <i>Nomada flavoguttata</i> |
| GBACU202412  | <i>Nomada</i> | <i>Nomada flavoguttata</i> |
| GBACU202512  | <i>Nomada</i> | <i>Nomada flavoguttata</i> |
| GBACU202612  | <i>Nomada</i> | <i>Nomada flavoguttata</i> |
| GBACU202712  | <i>Nomada</i> | <i>Nomada flavoguttata</i> |
| GBACU34612   | <i>Nomada</i> | <i>Nomada flavoguttata</i> |
| GBACU34712   | <i>Nomada</i> | <i>Nomada flavoguttata</i> |
| GBACU82712   | <i>Nomada</i> | <i>Nomada flavoguttata</i> |
| GBACU82812   | <i>Nomada</i> | <i>Nomada flavoguttata</i> |
| GBACU82912   | <i>Nomada</i> | <i>Nomada flavoguttata</i> |
| GBACU83012   | <i>Nomada</i> | <i>Nomada flavoguttata</i> |
| GBACU83112   | <i>Nomada</i> | <i>Nomada flavoguttata</i> |
| GBACU83212   | <i>Nomada</i> | <i>Nomada flavoguttata</i> |
| GBACU83312   | <i>Nomada</i> | <i>Nomada flavoguttata</i> |
| GBAH1649319  | <i>Nomada</i> | <i>Nomada flavoguttata</i> |
| GBAH1740519  | <i>Nomada</i> | <i>Nomada flavoguttata</i> |
| GBMNB6232720 | <i>Nomada</i> | <i>Nomada flavoguttata</i> |

|              |               |                            |
|--------------|---------------|----------------------------|
| GBMNB6233220 | <i>Nomada</i> | <i>Nomada flavoguttata</i> |
| GMBUC16914   | <i>Nomada</i> | <i>Nomada flavoguttata</i> |
| GMBUC19914   | <i>Nomada</i> | <i>Nomada flavoguttata</i> |
| GMGMH91514   | <i>Nomada</i> | <i>Nomada flavoguttata</i> |
| GMGMI43314   | <i>Nomada</i> | <i>Nomada flavoguttata</i> |
| GMGML96314   | <i>Nomada</i> | <i>Nomada flavoguttata</i> |
| GMGMN55614   | <i>Nomada</i> | <i>Nomada flavoguttata</i> |
| GMGRD346013  | <i>Nomada</i> | <i>Nomada flavoguttata</i> |
| IBBP15310    | <i>Nomada</i> | <i>Nomada flavoguttata</i> |
| IBBP19810    | <i>Nomada</i> | <i>Nomada flavoguttata</i> |
| IBBP19910    | <i>Nomada</i> | <i>Nomada flavoguttata</i> |
| IBBP20010    | <i>Nomada</i> | <i>Nomada flavoguttata</i> |
| IBBP20110    | <i>Nomada</i> | <i>Nomada flavoguttata</i> |
| IBBP20210    | <i>Nomada</i> | <i>Nomada flavoguttata</i> |
| POLLE198719  | <i>Nomada</i> | <i>Nomada flavoguttata</i> |
| POLLE240419  | <i>Nomada</i> | <i>Nomada flavoguttata</i> |
| POLLE298519  | <i>Nomada</i> | <i>Nomada flavoguttata</i> |
| POLLE33719   | <i>Nomada</i> | <i>Nomada flavoguttata</i> |
| POLLE36419   | <i>Nomada</i> | <i>Nomada flavoguttata</i> |
| POLLE55819   | <i>Nomada</i> | <i>Nomada flavoguttata</i> |
| POLLE56719   | <i>Nomada</i> | <i>Nomada flavoguttata</i> |
| POLLE56819   | <i>Nomada</i> | <i>Nomada flavoguttata</i> |
| POLLE57319   | <i>Nomada</i> | <i>Nomada flavoguttata</i> |
| POLLE88319   | <i>Nomada</i> | <i>Nomada flavoguttata</i> |
| BEEEE08915   | <i>Nomada</i> | <i>Nomada flavopicta</i>   |
| BEEEE22915   | <i>Nomada</i> | <i>Nomada flavopicta</i>   |
| FBAPB20709   | <i>Nomada</i> | <i>Nomada flavopicta</i>   |
| FBAPB20809   | <i>Nomada</i> | <i>Nomada flavopicta</i>   |
| FBAPB20909   | <i>Nomada</i> | <i>Nomada flavopicta</i>   |
| FBAPC14310   | <i>Nomada</i> | <i>Nomada flavopicta</i>   |
| FBAPC14410   | <i>Nomada</i> | <i>Nomada flavopicta</i>   |
| FBAPD71411   | <i>Nomada</i> | <i>Nomada flavopicta</i>   |
| GBACU108512  | <i>Nomada</i> | <i>Nomada flavopicta</i>   |
| GBACU108612  | <i>Nomada</i> | <i>Nomada flavopicta</i>   |
| GBACU201212  | <i>Nomada</i> | <i>Nomada flavopicta</i>   |
| GBACU211613  | <i>Nomada</i> | <i>Nomada flavopicta</i>   |
| GBACU350413  | <i>Nomada</i> | <i>Nomada flavopicta</i>   |
| GBACU350513  | <i>Nomada</i> | <i>Nomada flavopicta</i>   |
| GBACU350613  | <i>Nomada</i> | <i>Nomada flavopicta</i>   |
| GBACU350713  | <i>Nomada</i> | <i>Nomada flavopicta</i>   |
| GBHAP04013   | <i>Nomada</i> | <i>Nomada fragariae</i>    |
| GBHAP04113   | <i>Nomada</i> | <i>Nomada fragariae</i>    |
| BEEEE06615   | <i>Nomada</i> | <i>Nomada fucata</i>       |
| BEEEE23015   | <i>Nomada</i> | <i>Nomada fucata</i>       |
| FBACB71011   | <i>Nomada</i> | <i>Nomada fucata</i>       |
| FBAPC15610   | <i>Nomada</i> | <i>Nomada fucata</i>       |

|              |               |                           |                            |
|--------------|---------------|---------------------------|----------------------------|
| FBHAP42709   | <i>Nomada</i> | <i>Nomada fucata</i>      |                            |
| FBHAP42809   | <i>Nomada</i> | <i>Nomada fucata</i>      |                            |
| FBHAP42909   | <i>Nomada</i> | <i>Nomada fucata</i>      |                            |
| GBACU109112  | <i>Nomada</i> | <i>Nomada fucata</i>      |                            |
| GBACU165712  | <i>Nomada</i> | <i>Nomada fucata</i>      |                            |
| GBACU165812  | <i>Nomada</i> | <i>Nomada fucata</i>      |                            |
| GBACU200312  | <i>Nomada</i> | <i>Nomada fucata</i>      |                            |
| GBACU200412  | <i>Nomada</i> | <i>Nomada fucata</i>      |                            |
| GBACU351013  | <i>Nomada</i> | <i>Nomada fucata</i>      |                            |
| GBAH1856919  | <i>Nomada</i> | <i>Nomada fucata</i>      |                            |
| GBMIN7335617 | <i>Nomada</i> | <i>Nomada fucata</i>      |                            |
| BCHYM142913  | <i>Nomada</i> | <i>Nomada fulvicornis</i> |                            |
| BCHYM143013  | <i>Nomada</i> | <i>Nomada fulvicornis</i> |                            |
| BCHYM143113  | <i>Nomada</i> | <i>Nomada fulvicornis</i> |                            |
| FBAPB21109   | <i>Nomada</i> | <i>Nomada fulvicornis</i> |                            |
| FBHAP43109   | <i>Nomada</i> | <i>Nomada fulvicornis</i> |                            |
| FBHAP43209   | <i>Nomada</i> | <i>Nomada fulvicornis</i> |                            |
| FBHAP43309   | <i>Nomada</i> | <i>Nomada fulvicornis</i> |                            |
| GBACU108712  | <i>Nomada</i> | <i>Nomada fulvicornis</i> |                            |
| GBACU202812  | <i>Nomada</i> | <i>Nomada fulvicornis</i> |                            |
| GBCHA66313   | <i>Nomada</i> | <i>Nomada fulvicornis</i> | <i>Nomada meridionalis</i> |
| GBACU359513  | <i>Nomada</i> | <i>Nomada furva</i>       |                            |
| FBAPB21609   | <i>Nomada</i> | <i>Nomada fuscicornis</i> |                            |
| FBAPB21709   | <i>Nomada</i> | <i>Nomada fuscicornis</i> |                            |
| FBAPB21809   | <i>Nomada</i> | <i>Nomada fuscicornis</i> |                            |
| FBAPB21909   | <i>Nomada</i> | <i>Nomada fuscicornis</i> |                            |
| FBAPB29409   | <i>Nomada</i> | <i>Nomada fuscicornis</i> |                            |
| FBAPC12310   | <i>Nomada</i> | <i>Nomada fuscicornis</i> |                            |
| GBACU05512   | <i>Nomada</i> | <i>Nomada fuscicornis</i> |                            |
| GBACU05612   | <i>Nomada</i> | <i>Nomada fuscicornis</i> |                            |
| GBACU351313  | <i>Nomada</i> | <i>Nomada fuscicornis</i> |                            |
| ABEE18617    | <i>Nomada</i> | <i>Nomada goodeniana</i>  |                            |
| BEEEE08415   | <i>Nomada</i> | <i>Nomada goodeniana</i>  |                            |
| BEEEE18415   | <i>Nomada</i> | <i>Nomada goodeniana</i>  |                            |
| FBAPB22009   | <i>Nomada</i> | <i>Nomada goodeniana</i>  |                            |
| FBAPB22109   | <i>Nomada</i> | <i>Nomada goodeniana</i>  |                            |
| FBAPC16310   | <i>Nomada</i> | <i>Nomada goodeniana</i>  |                            |
| FBAPD18011   | <i>Nomada</i> | <i>Nomada goodeniana</i>  |                            |
| FBAPD18111   | <i>Nomada</i> | <i>Nomada goodeniana</i>  |                            |
| FBHAP43409   | <i>Nomada</i> | <i>Nomada goodeniana</i>  |                            |
| FBHAP43509   | <i>Nomada</i> | <i>Nomada goodeniana</i>  |                            |
| GBACU246113  | <i>Nomada</i> | <i>Nomada goodeniana</i>  |                            |
| GBACU246213  | <i>Nomada</i> | <i>Nomada goodeniana</i>  |                            |
| GBACU246313  | <i>Nomada</i> | <i>Nomada goodeniana</i>  |                            |
| GBAH1740819  | <i>Nomada</i> | <i>Nomada goodeniana</i>  |                            |
| IBBP15410    | <i>Nomada</i> | <i>Nomada goodeniana</i>  |                            |



|              |               |                            |
|--------------|---------------|----------------------------|
| IBBP15510    | <i>Nomada</i> | <i>Nomada goodeniana</i>   |
| IBBP15610    | <i>Nomada</i> | <i>Nomada goodeniana</i>   |
| POLLE201019  | <i>Nomada</i> | <i>Nomada goodeniana</i>   |
| BEECA05706   | <i>Nomada</i> | <i>Nomada gracilis</i>     |
| HDBNS10603   | <i>Nomada</i> | <i>Nomada gracilis</i>     |
| HDBNS10803   | <i>Nomada</i> | <i>Nomada gracilis</i>     |
| JSHYM12611   | <i>Nomada</i> | <i>Nomada gracilis</i>     |
| BBHYA147812  | <i>Nomada</i> | <i>Nomada gutierreziae</i> |
| BEECC41408   | <i>Nomada</i> | <i>Nomada gutierreziae</i> |
| HMBME13007   | <i>Nomada</i> | <i>Nomada gutierreziae</i> |
| FBAPB22209   | <i>Nomada</i> | <i>Nomada guttulata</i>    |
| FBAPB22309   | <i>Nomada</i> | <i>Nomada guttulata</i>    |
| FBAPB22509   | <i>Nomada</i> | <i>Nomada guttulata</i>    |
| FBAPC13310   | <i>Nomada</i> | <i>Nomada guttulata</i>    |
| FBAPC13410   | <i>Nomada</i> | <i>Nomada guttulata</i>    |
| FBAPC51711   | <i>Nomada</i> | <i>Nomada guttulata</i>    |
| FBAPB22609   | <i>Nomada</i> | <i>Nomada hirtipes</i>     |
| FBAPB22809   | <i>Nomada</i> | <i>Nomada hirtipes</i>     |
| FBAPB22909   | <i>Nomada</i> | <i>Nomada hirtipes</i>     |
| FBHAP45009   | <i>Nomada</i> | <i>Nomada hirtipes</i>     |
| TTHYW76408   | <i>Nomada</i> | <i>Nomada hydrophylli</i>  |
| BEECA05906   | <i>Nomada</i> | <i>Nomada illinoensis</i>  |
| BEECA06006   | <i>Nomada</i> | <i>Nomada illinoensis</i>  |
| BEECA06106   | <i>Nomada</i> | <i>Nomada illinoensis</i>  |
| BEECA06206   | <i>Nomada</i> | <i>Nomada illinoensis</i>  |
| BEO07104     | <i>Nomada</i> | <i>Nomada illinoensis</i>  |
| HDBNS14703   | <i>Nomada</i> | <i>Nomada illinoensis</i>  |
| PHMTT88310   | <i>Nomada</i> | <i>Nomada illinoensis</i>  |
| PHMTX31911   | <i>Nomada</i> | <i>Nomada illinoensis</i>  |
| BEECA06706   | <i>Nomada</i> | <i>Nomada imbricata</i>    |
| BEECA57006   | <i>Nomada</i> | <i>Nomada imbricata</i>    |
| BEECA64106   | <i>Nomada</i> | <i>Nomada imbricata</i>    |
| BEECC32808   | <i>Nomada</i> | <i>Nomada imbricata</i>    |
| BEECC32908   | <i>Nomada</i> | <i>Nomada imbricata</i>    |
| BEECC33108   | <i>Nomada</i> | <i>Nomada imbricata</i>    |
| BEECC33208   | <i>Nomada</i> | <i>Nomada imbricata</i>    |
| BEECC33308   | <i>Nomada</i> | <i>Nomada imbricata</i>    |
| BUSA21105    | <i>Nomada</i> | <i>Nomada imbricata</i>    |
| GBMNA2181919 | <i>Nomada</i> | <i>Nomada imbricata</i>    |
| HCBNS09803   | <i>Nomada</i> | <i>Nomada imbricata</i>    |
| HDBNS21804   | <i>Nomada</i> | <i>Nomada imbricata</i>    |
| BEECA07006   | <i>Nomada</i> | <i>Nomada inepta</i>       |
| BEECA07106   | <i>Nomada</i> | <i>Nomada inepta</i>       |
| BEECA07206   | <i>Nomada</i> | <i>Nomada inepta</i>       |
| FBAPB23009   | <i>Nomada</i> | <i>Nomada integra</i>      |
| FBAPC12210   | <i>Nomada</i> | <i>Nomada integra</i>      |

|              |               |                             |
|--------------|---------------|-----------------------------|
| FBAPC13810   | <i>Nomada</i> | <i>Nomada integra</i>       |
| FBAPC13910   | <i>Nomada</i> | <i>Nomada integra</i>       |
| GBAH1857019  | <i>Nomada</i> | <i>Nomada integra</i>       |
| GBMNA3292319 | <i>Nomada</i> | <i>Nomada japonica</i>      |
| FBAPB23609   | <i>Nomada</i> | <i>Nomada kohli</i>         |
| DIAL21206    | <i>Nomada</i> | <i>Nomada krugii</i>        |
| BEEEE06715   | <i>Nomada</i> | <i>Nomada lathburiana</i>   |
| FBHAP18509   | <i>Nomada</i> | <i>Nomada lathburiana</i>   |
| FBHAP43609   | <i>Nomada</i> | <i>Nomada lathburiana</i>   |
| FBHAP43709   | <i>Nomada</i> | <i>Nomada lathburiana</i>   |
| FBHAP43809   | <i>Nomada</i> | <i>Nomada lathburiana</i>   |
| GBACU200512  | <i>Nomada</i> | <i>Nomada lathburiana</i>   |
| GBACU200612  | <i>Nomada</i> | <i>Nomada lathburiana</i>   |
| GBACU200712  | <i>Nomada</i> | <i>Nomada lathburiana</i>   |
| GBACU200812  | <i>Nomada</i> | <i>Nomada lathburiana</i>   |
| GBACU200912  | <i>Nomada</i> | <i>Nomada lathburiana</i>   |
| GBACU201012  | <i>Nomada</i> | <i>Nomada lathburiana</i>   |
| GBACU201112  | <i>Nomada</i> | <i>Nomada lathburiana</i>   |
| BEECA06306   | <i>Nomada</i> | <i>Nomada lehighensis</i>   |
| BEECC39708   | <i>Nomada</i> | <i>Nomada lehighensis</i>   |
| BEECC39808   | <i>Nomada</i> | <i>Nomada lehighensis</i>   |
| BEECC40008   | <i>Nomada</i> | <i>Nomada lehighensis</i>   |
| GBHAP01613   | <i>Nomada</i> | <i>Nomada lehighensis</i>   |
| GBHAP01713   | <i>Nomada</i> | <i>Nomada lehighensis</i>   |
| GBHAP01813   | <i>Nomada</i> | <i>Nomada lehighensis</i>   |
| GBHAP01913   | <i>Nomada</i> | <i>Nomada lehighensis</i>   |
| GBHAP02013   | <i>Nomada</i> | <i>Nomada lehighensis</i>   |
| GBHAP02113   | <i>Nomada</i> | <i>Nomada lehighensis</i>   |
| GBHAP02213   | <i>Nomada</i> | <i>Nomada lehighensis</i>   |
| GBHAP02313   | <i>Nomada</i> | <i>Nomada lehighensis</i>   |
| GBHAP02413   | <i>Nomada</i> | <i>Nomada lehighensis</i>   |
| GBHAP02513   | <i>Nomada</i> | <i>Nomada lehighensis</i>   |
| GBHAP02613   | <i>Nomada</i> | <i>Nomada lehighensis</i>   |
| HDBNS13403   | <i>Nomada</i> | <i>Nomada lehighensis</i>   |
| HDBNS13703   | <i>Nomada</i> | <i>Nomada lehighensis</i>   |
| HDBNS14603   | <i>Nomada</i> | <i>Nomada lehighensis</i>   |
| HDBNS14803   | <i>Nomada</i> | <i>Nomada lehighensis</i>   |
| HVFW10419    | <i>Nomada</i> | <i>Nomada lehighensis</i>   |
| HDBNS11803   | <i>Nomada</i> | <i>Nomada lepida</i>        |
| HDBNS12403   | <i>Nomada</i> | <i>Nomada lepida</i>        |
| HDBNS12503   | <i>Nomada</i> | <i>Nomada lepida</i>        |
| HDBNS13503   | <i>Nomada</i> | <i>Nomada lepida</i>        |
| HDBNS14403   | <i>Nomada</i> | <i>Nomada lepida</i>        |
| PHMTV27710   | <i>Nomada</i> | <i>Nomada lepida</i>        |
| UPOLL14709   | <i>Nomada</i> | <i>Nomada lepida</i>        |
| BEEEE06915   | <i>Nomada</i> | <i>Nomada leucophthalma</i> |

|             |               |                             |
|-------------|---------------|-----------------------------|
| BEEEE32916  | <i>Nomada</i> | <i>Nomada leucophthalma</i> |
| FBAPB23709  | <i>Nomada</i> | <i>Nomada leucophthalma</i> |
| FBAPB23809  | <i>Nomada</i> | <i>Nomada leucophthalma</i> |
| FBHAP43909  | <i>Nomada</i> | <i>Nomada leucophthalma</i> |
| FBHAP44009  | <i>Nomada</i> | <i>Nomada leucophthalma</i> |
| GMGRD362813 | <i>Nomada</i> | <i>Nomada leucophthalma</i> |
| IBBP15810   | <i>Nomada</i> | <i>Nomada leucophthalma</i> |
| IBBP15910   | <i>Nomada</i> | <i>Nomada leucophthalma</i> |
| IBBP16010   | <i>Nomada</i> | <i>Nomada leucophthalma</i> |
| IBBP16110   | <i>Nomada</i> | <i>Nomada leucophthalma</i> |
| IBBP16210   | <i>Nomada</i> | <i>Nomada leucophthalma</i> |
| IBBP16310   | <i>Nomada</i> | <i>Nomada leucophthalma</i> |
| IBBP16410   | <i>Nomada</i> | <i>Nomada leucophthalma</i> |
| BEECC33008  | <i>Nomada</i> | <i>Nomada luteoloides</i>   |
| BUSA40105   | <i>Nomada</i> | <i>Nomada luteoloides</i>   |
| BEECA05806  | <i>Nomada</i> | <i>Nomada maculata</i>      |
| BEECA63306  | <i>Nomada</i> | <i>Nomada maculata</i>      |
| BEECA63406  | <i>Nomada</i> | <i>Nomada maculata</i>      |
| BEECA63506  | <i>Nomada</i> | <i>Nomada maculata</i>      |
| BEECA63606  | <i>Nomada</i> | <i>Nomada maculata</i>      |
| BUSA40205   | <i>Nomada</i> | <i>Nomada maculata</i>      |
| HDBNS11503  | <i>Nomada</i> | <i>Nomada maculata</i>      |
| HDBNS11603  | <i>Nomada</i> | <i>Nomada maculata</i>      |
| HDBNS12003  | <i>Nomada</i> | <i>Nomada maculata</i>      |
| HDBNS12103  | <i>Nomada</i> | <i>Nomada maculata</i>      |
| HDBNS12203  | <i>Nomada</i> | <i>Nomada maculata</i>      |
| HDBNS22004  | <i>Nomada</i> | <i>Nomada maculata</i>      |
| BEEEE06815  | <i>Nomada</i> | <i>Nomada marshamella</i>   |
| BEEEE17715  | <i>Nomada</i> | <i>Nomada marshamella</i>   |
| BEEEE27116  | <i>Nomada</i> | <i>Nomada marshamella</i>   |
| FBAPC16610  | <i>Nomada</i> | <i>Nomada marshamella</i>   |
| FBAPC16710  | <i>Nomada</i> | <i>Nomada marshamella</i>   |
| FBHAP44109  | <i>Nomada</i> | <i>Nomada marshamella</i>   |
| FBHAP44209  | <i>Nomada</i> | <i>Nomada marshamella</i>   |
| FBHAP44309  | <i>Nomada</i> | <i>Nomada marshamella</i>   |
| FBHAP44409  | <i>Nomada</i> | <i>Nomada marshamella</i>   |
| GBACU246413 | <i>Nomada</i> | <i>Nomada marshamella</i>   |
| IBBP16610   | <i>Nomada</i> | <i>Nomada marshamella</i>   |
| IBBP16710   | <i>Nomada</i> | <i>Nomada marshamella</i>   |
| IBBP16810   | <i>Nomada</i> | <i>Nomada marshamella</i>   |
| IBBP16910   | <i>Nomada</i> | <i>Nomada marshamella</i>   |
| IBBP17010   | <i>Nomada</i> | <i>Nomada marshamella</i>   |
| IBBP17110   | <i>Nomada</i> | <i>Nomada marshamella</i>   |
| IBBP17210   | <i>Nomada</i> | <i>Nomada marshamella</i>   |
| IBBP17310   | <i>Nomada</i> | <i>Nomada marshamella</i>   |
| POLLE147019 | <i>Nomada</i> | <i>Nomada marshamella</i>   |

|            |               |                             |
|------------|---------------|-----------------------------|
| FBAPB24009 | <i>Nomada</i> | <i>Nomada melathoracica</i> |
| FBAPB24109 | <i>Nomada</i> | <i>Nomada melathoracica</i> |
| FBAPB28809 | <i>Nomada</i> | <i>Nomada minuscula</i>     |
| FBAPB29009 | <i>Nomada</i> | <i>Nomada minuscula</i>     |
| FBAPC12910 | <i>Nomada</i> | <i>Nomada minuscula</i>     |
| FBAPC13010 | <i>Nomada</i> | <i>Nomada minuscula</i>     |
| FBAPC13110 | <i>Nomada</i> | <i>Nomada minuscula</i>     |
| FBAPC88511 | <i>Nomada</i> | <i>Nomada minuscula</i>     |
| FBAPC88611 | <i>Nomada</i> | <i>Nomada minuscula</i>     |
| FBAPC88711 | <i>Nomada</i> | <i>Nomada minuscula</i>     |
| FBAPC88811 | <i>Nomada</i> | <i>Nomada minuscula</i>     |
| FBAPD20111 | <i>Nomada</i> | <i>Nomada minuscula</i>     |
| FBAPD74211 | <i>Nomada</i> | <i>Nomada minuscula</i>     |
| FBAPD74311 | <i>Nomada</i> | <i>Nomada minuscula</i>     |
| FBAPD74511 | <i>Nomada</i> | <i>Nomada minuscula</i>     |
| GBACU05712 | <i>Nomada</i> | <i>Nomada minuscula</i>     |
| GBACU34912 | <i>Nomada</i> | <i>Nomada minuscula</i>     |
| FBAPB24209 | <i>Nomada</i> | <i>Nomada moeschleri</i>    |
| FBHAP44509 | <i>Nomada</i> | <i>Nomada moeschleri</i>    |
| FBHAP44609 | <i>Nomada</i> | <i>Nomada moeschleri</i>    |
| FBAPB24809 | <i>Nomada</i> | <i>Nomada mutabilis</i>     |
| MAHYM61311 | <i>Nomada</i> | <i>Nomada mutabilis</i>     |
| MAHYM65211 | <i>Nomada</i> | <i>Nomada mutabilis</i>     |
| FBAPB25309 | <i>Nomada</i> | <i>Nomada mutica</i>        |
| GBACU85012 | <i>Nomada</i> | <i>Nomada mutica</i>        |
| FBAPD74811 | <i>Nomada</i> | <i>Nomada nobilis</i>       |
| FBAPD74911 | <i>Nomada</i> | <i>Nomada nobilis</i>       |
| ARTNO09917 | <i>Nomada</i> | <i>Nomada obscura</i>       |
| FBAPB25409 | <i>Nomada</i> | <i>Nomada obscura</i>       |
| FBAPD74611 | <i>Nomada</i> | <i>Nomada obscura</i>       |
| FBAPD74711 | <i>Nomada</i> | <i>Nomada obscura</i>       |
| FBAPD20711 | <i>Nomada</i> | <i>Nomada obtusifrons</i>   |
| FBAPD20811 | <i>Nomada</i> | <i>Nomada obtusifrons</i>   |
| IBBP17410  | <i>Nomada</i> | <i>Nomada obtusifrons</i>   |
| IBBP17510  | <i>Nomada</i> | <i>Nomada obtusifrons</i>   |
| IBBP17610  | <i>Nomada</i> | <i>Nomada obtusifrons</i>   |
| FBACB68311 | <i>Nomada</i> | <i>Nomada opaca</i>         |
| FBAPB25709 | <i>Nomada</i> | <i>Nomada opaca</i>         |
| FBAPB25809 | <i>Nomada</i> | <i>Nomada opaca</i>         |
| HDBNS12303 | <i>Nomada</i> | <i>Nomada ovata</i>         |
| ARTNO10117 | <i>Nomada</i> | <i>Nomada panzeri</i>       |
| ARTNO10617 | <i>Nomada</i> | <i>Nomada panzeri</i>       |
| ARTNO10717 | <i>Nomada</i> | <i>Nomada panzeri</i>       |
| ARTNO10817 | <i>Nomada</i> | <i>Nomada panzeri</i>       |
| BEEEE28016 | <i>Nomada</i> | <i>Nomada panzeri</i>       |
| BEEEE34616 | <i>Nomada</i> | <i>Nomada panzeri</i>       |

|              |               |                        |                        |
|--------------|---------------|------------------------|------------------------|
| BEEEE34716   | <i>Nomada</i> | <i>Nomada panzeri</i>  |                        |
| BEEEE34816   | <i>Nomada</i> | <i>Nomada panzeri</i>  |                        |
| FBAPB30909   | <i>Nomada</i> | <i>Nomada panzeri</i>  | <i>Nomada glabella</i> |
| FBAPB31009   | <i>Nomada</i> | <i>Nomada panzeri</i>  |                        |
| FBAPD72211   | <i>Nomada</i> | <i>Nomada panzeri</i>  |                        |
| FBAPD72311   | <i>Nomada</i> | <i>Nomada panzeri</i>  |                        |
| FBAPD72511   | <i>Nomada</i> | <i>Nomada panzeri</i>  |                        |
| FBAPD73811   | <i>Nomada</i> | <i>Nomada panzeri</i>  | <i>Nomada glabella</i> |
| FBAPD73911   | <i>Nomada</i> | <i>Nomada panzeri</i>  | <i>Nomada glabella</i> |
| FBAPD74011   | <i>Nomada</i> | <i>Nomada panzeri</i>  | <i>Nomada glabella</i> |
| FBAPD74111   | <i>Nomada</i> | <i>Nomada panzeri</i>  | <i>Nomada glabella</i> |
| FBHAP40609   | <i>Nomada</i> | <i>Nomada panzeri</i>  |                        |
| FBHAP44809   | <i>Nomada</i> | <i>Nomada panzeri</i>  |                        |
| GBACU199712  | <i>Nomada</i> | <i>Nomada panzeri</i>  |                        |
| GBACU199812  | <i>Nomada</i> | <i>Nomada panzeri</i>  |                        |
| GBACU202012  | <i>Nomada</i> | <i>Nomada panzeri</i>  |                        |
| GBACU202112  | <i>Nomada</i> | <i>Nomada panzeri</i>  |                        |
| GBACU34812   | <i>Nomada</i> | <i>Nomada panzeri</i>  |                        |
| GBAH1650019  | <i>Nomada</i> | <i>Nomada panzeri</i>  |                        |
| GBMIN7335717 | <i>Nomada</i> | <i>Nomada panzeri</i>  |                        |
| GBMIN7335817 | <i>Nomada</i> | <i>Nomada panzeri</i>  |                        |
| GBMIN7335917 | <i>Nomada</i> | <i>Nomada panzeri</i>  |                        |
| IBBP15710    | <i>Nomada</i> | <i>Nomada panzeri</i>  |                        |
| IBBP16510    | <i>Nomada</i> | <i>Nomada panzeri</i>  |                        |
| IBBP18910    | <i>Nomada</i> | <i>Nomada panzeri</i>  |                        |
| IBBP19010    | <i>Nomada</i> | <i>Nomada panzeri</i>  |                        |
| IBBP19110    | <i>Nomada</i> | <i>Nomada panzeri</i>  |                        |
| IBBP19210    | <i>Nomada</i> | <i>Nomada panzeri</i>  |                        |
| IBBP19310    | <i>Nomada</i> | <i>Nomada panzeri</i>  |                        |
| IBBP19410    | <i>Nomada</i> | <i>Nomada panzeri</i>  |                        |
| IBBP19510    | <i>Nomada</i> | <i>Nomada panzeri</i>  |                        |
| JSYKA11010   | <i>Nomada</i> | <i>Nomada panzeri</i>  |                        |
| JSYKA11110   | <i>Nomada</i> | <i>Nomada panzeri</i>  |                        |
| JSYKA11210   | <i>Nomada</i> | <i>Nomada panzeri</i>  |                        |
| JSYKA11310   | <i>Nomada</i> | <i>Nomada panzeri</i>  |                        |
| JSYKA11410   | <i>Nomada</i> | <i>Nomada panzeri</i>  |                        |
| NOBEE07709   | <i>Nomada</i> | <i>Nomada panzeri</i>  |                        |
| BBHEC09609   | <i>Nomada</i> | <i>Nomada perplexa</i> |                        |
| BBHEC09709   | <i>Nomada</i> | <i>Nomada perplexa</i> |                        |
| BBHEC38109   | <i>Nomada</i> | <i>Nomada perplexa</i> |                        |
| BBHEC58309   | <i>Nomada</i> | <i>Nomada perplexa</i> |                        |
| BBHEC78410   | <i>Nomada</i> | <i>Nomada perplexa</i> |                        |
| BBHYL40110   | <i>Nomada</i> | <i>Nomada perplexa</i> |                        |
| BEECA62706   | <i>Nomada</i> | <i>Nomada perplexa</i> |                        |
| BEECC33808   | <i>Nomada</i> | <i>Nomada perplexa</i> |                        |
| CNTNE04214   | <i>Nomada</i> | <i>Nomada perplexa</i> |                        |

|             |               |                             |                            |
|-------------|---------------|-----------------------------|----------------------------|
| SMTPB669713 | <i>Nomada</i> | <i>Nomada perplexa</i>      |                            |
| BEECB17707  | <i>Nomada</i> | <i>Nomada pilipes</i>       |                            |
| FBAPB26109  | <i>Nomada</i> | <i>Nomada pleurosticta</i>  |                            |
| FBAPB26209  | <i>Nomada</i> | <i>Nomada pleurosticta</i>  |                            |
| FBAPC14110  | <i>Nomada</i> | <i>Nomada pleurosticta</i>  |                            |
| FBAPC14210  | <i>Nomada</i> | <i>Nomada pleurosticta</i>  |                            |
| FBAPB26309  | <i>Nomada</i> | <i>Nomada posthuma</i>      |                            |
| FBAPB26409  | <i>Nomada</i> | <i>Nomada posthuma</i>      |                            |
| FBAPC13210  | <i>Nomada</i> | <i>Nomada posthuma</i>      |                            |
| FBHAP45109  | <i>Nomada</i> | <i>Nomada posthuma</i>      |                            |
| FBHAP45209  | <i>Nomada</i> | <i>Nomada posthuma</i>      |                            |
| GMRSQ10815  | <i>Nomada</i> | <i>Nomada posthuma</i>      |                            |
| GMRSQ11315  | <i>Nomada</i> | <i>Nomada posthuma</i>      |                            |
| GMRST23715  | <i>Nomada</i> | <i>Nomada posthuma</i>      |                            |
| GMRSU27315  | <i>Nomada</i> | <i>Nomada posthuma</i>      |                            |
| GMRSU28215  | <i>Nomada</i> | <i>Nomada posthuma</i>      |                            |
| GMRSV19815  | <i>Nomada</i> | <i>Nomada posthuma</i>      |                            |
| GMRSV26515  | <i>Nomada</i> | <i>Nomada posthuma</i>      |                            |
| GMRSV26615  | <i>Nomada</i> | <i>Nomada posthuma</i>      |                            |
| BEECA63906  | <i>Nomada</i> | <i>Nomada pygmaea</i>       |                            |
| BEECA64006  | <i>Nomada</i> | <i>Nomada pygmaea</i>       |                            |
| BEECB105607 | <i>Nomada</i> | <i>Nomada pygmaea</i>       |                            |
| BEECB105707 | <i>Nomada</i> | <i>Nomada pygmaea</i>       |                            |
| BEO02704    | <i>Nomada</i> | <i>Nomada pygmaea</i>       |                            |
| BEO03004    | <i>Nomada</i> | <i>Nomada pygmaea</i>       |                            |
| BEO03404    | <i>Nomada</i> | <i>Nomada pygmaea</i>       |                            |
| GMGSB43712  | <i>Nomada</i> | <i>Nomada pygmaea</i>       |                            |
| GMGSK14112  | <i>Nomada</i> | <i>Nomada pygmaea</i>       |                            |
| HDBNS12703  | <i>Nomada</i> | <i>Nomada pygmaea</i>       |                            |
| FBAPB26509  | <i>Nomada</i> | <i>Nomada rhenana</i>       |                            |
| FBAPB26609  | <i>Nomada</i> | <i>Nomada rhenana</i>       |                            |
| BCHYM146313 | <i>Nomada</i> | <i>Nomada roberjeotiana</i> |                            |
| FBAPB24409  | <i>Nomada</i> | <i>Nomada roberjeotiana</i> | <i>Nomada tormentillae</i> |
| FBAPB24509  | <i>Nomada</i> | <i>Nomada roberjeotiana</i> | <i>Nomada tormentillae</i> |
| FBAPB24609  | <i>Nomada</i> | <i>Nomada roberjeotiana</i> | <i>Nomada tormentillae</i> |
| FBAPB26909  | <i>Nomada</i> | <i>Nomada roberjeotiana</i> |                            |
| FBAPB27109  | <i>Nomada</i> | <i>Nomada roberjeotiana</i> |                            |
| FBAPC15010  | <i>Nomada</i> | <i>Nomada roberjeotiana</i> |                            |
| FBAPD75711  | <i>Nomada</i> | <i>Nomada rostrata</i>      |                            |
| FBAPD75811  | <i>Nomada</i> | <i>Nomada rostrata</i>      |                            |
| ARTNO15817  | <i>Nomada</i> | <i>Nomada ruficornis</i>    |                            |
| ARTNO15917  | <i>Nomada</i> | <i>Nomada ruficornis</i>    |                            |
| BCHYM150913 | <i>Nomada</i> | <i>Nomada ruficornis</i>    |                            |
| BEEEE08515  | <i>Nomada</i> | <i>Nomada ruficornis</i>    |                            |
| FBAPB27509  | <i>Nomada</i> | <i>Nomada ruficornis</i>    |                            |
| FBAPC12510  | <i>Nomada</i> | <i>Nomada ruficornis</i>    |                            |

|             |               |                           |
|-------------|---------------|---------------------------|
| FBAPC51311  | <i>Nomada</i> | <i>Nomada ruficornis</i>  |
| FBAPD18411  | <i>Nomada</i> | <i>Nomada ruficornis</i>  |
| FBAPD18511  | <i>Nomada</i> | <i>Nomada ruficornis</i>  |
| FBAPD18611  | <i>Nomada</i> | <i>Nomada ruficornis</i>  |
| FBAPD18711  | <i>Nomada</i> | <i>Nomada ruficornis</i>  |
| FBHAP45309  | <i>Nomada</i> | <i>Nomada ruficornis</i>  |
| FBHAP45409  | <i>Nomada</i> | <i>Nomada ruficornis</i>  |
| GBAH1740419 | <i>Nomada</i> | <i>Nomada ruficornis</i>  |
| GMGMH33814  | <i>Nomada</i> | <i>Nomada ruficornis</i>  |
| GMGRA167113 | <i>Nomada</i> | <i>Nomada ruficornis</i>  |
| GMGRA169113 | <i>Nomada</i> | <i>Nomada ruficornis</i>  |
| GMGRB136613 | <i>Nomada</i> | <i>Nomada ruficornis</i>  |
| IBBP17710   | <i>Nomada</i> | <i>Nomada ruficornis</i>  |
| IBBP17810   | <i>Nomada</i> | <i>Nomada ruficornis</i>  |
| IBBP17910   | <i>Nomada</i> | <i>Nomada ruficornis</i>  |
| IBBP18010   | <i>Nomada</i> | <i>Nomada ruficornis</i>  |
| IBBP18110   | <i>Nomada</i> | <i>Nomada ruficornis</i>  |
| IBBP18210   | <i>Nomada</i> | <i>Nomada ruficornis</i>  |
| IBBP18310   | <i>Nomada</i> | <i>Nomada ruficornis</i>  |
| IBBP18410   | <i>Nomada</i> | <i>Nomada ruficornis</i>  |
| IBBP18510   | <i>Nomada</i> | <i>Nomada ruficornis</i>  |
| IBBP18610   | <i>Nomada</i> | <i>Nomada ruficornis</i>  |
| IBBP18710   | <i>Nomada</i> | <i>Nomada ruficornis</i>  |
| IBBP18810   | <i>Nomada</i> | <i>Nomada ruficornis</i>  |
| NOBEE07609  | <i>Nomada</i> | <i>Nomada ruficornis</i>  |
| POLLE205019 | <i>Nomada</i> | <i>Nomada ruficornis</i>  |
| POLLE32719  | <i>Nomada</i> | <i>Nomada ruficornis</i>  |
| BEEEE23615  | <i>Nomada</i> | <i>Nomada rufipes</i>     |
| FBAPB27609  | <i>Nomada</i> | <i>Nomada rufipes</i>     |
| FBAPB27809  | <i>Nomada</i> | <i>Nomada rufipes</i>     |
| FBAPB27909  | <i>Nomada</i> | <i>Nomada rufipes</i>     |
| FBAPC15310  | <i>Nomada</i> | <i>Nomada rufipes</i>     |
| GBACU232913 | <i>Nomada</i> | <i>Nomada rufipes</i>     |
| GBACU233013 | <i>Nomada</i> | <i>Nomada rufipes</i>     |
| GBACU233113 | <i>Nomada</i> | <i>Nomada rufipes</i>     |
| GBACU233213 | <i>Nomada</i> | <i>Nomada rufipes</i>     |
| GBACU235213 | <i>Nomada</i> | <i>Nomada rufipes</i>     |
| GBACU31412  | <i>Nomada</i> | <i>Nomada rufipes</i>     |
| IBBP19610   | <i>Nomada</i> | <i>Nomada rufipes</i>     |
| IBBP19710   | <i>Nomada</i> | <i>Nomada rufipes</i>     |
| NOBEE07409  | <i>Nomada</i> | <i>Nomada rufipes</i>     |
| BEECA64206  | <i>Nomada</i> | <i>Nomada sayi</i>        |
| JSHYN35111  | <i>Nomada</i> | <i>Nomada sayi</i>        |
| FBAPB28009  | <i>Nomada</i> | <i>Nomada sexfasciata</i> |
| FBAPB28209  | <i>Nomada</i> | <i>Nomada sexfasciata</i> |
| FBAPC16810  | <i>Nomada</i> | <i>Nomada sexfasciata</i> |

|              |               |                           |
|--------------|---------------|---------------------------|
| FBAPC16910   | <i>Nomada</i> | <i>Nomada sexfasciata</i> |
| FBAPD19611   | <i>Nomada</i> | <i>Nomada sheppardana</i> |
| FBAPD19711   | <i>Nomada</i> | <i>Nomada sheppardana</i> |
| FBAPD19811   | <i>Nomada</i> | <i>Nomada sheppardana</i> |
| FBAPD19911   | <i>Nomada</i> | <i>Nomada sheppardana</i> |
| FBAPB29209   | <i>Nomada</i> | <i>Nomada signata</i>     |
| FBAPB29309   | <i>Nomada</i> | <i>Nomada signata</i>     |
| FBHAP45509   | <i>Nomada</i> | <i>Nomada signata</i>     |
| FBHAP45609   | <i>Nomada</i> | <i>Nomada signata</i>     |
| GBACU165612  | <i>Nomada</i> | <i>Nomada signata</i>     |
| GBACU199612  | <i>Nomada</i> | <i>Nomada signata</i>     |
| GBACU199912  | <i>Nomada</i> | <i>Nomada signata</i>     |
| GBACU200012  | <i>Nomada</i> | <i>Nomada signata</i>     |
| GBACU246913  | <i>Nomada</i> | <i>Nomada signata</i>     |
| GBACU247013  | <i>Nomada</i> | <i>Nomada signata</i>     |
| FBAPB29509   | <i>Nomada</i> | <i>Nomada similis</i>     |
| FBAPB29609   | <i>Nomada</i> | <i>Nomada similis</i>     |
| FBAPB29709   | <i>Nomada</i> | <i>Nomada similis</i>     |
| FBAPC70511   | <i>Nomada</i> | <i>Nomada similis</i>     |
| FBAPC70611   | <i>Nomada</i> | <i>Nomada similis</i>     |
| FBAPD75511   | <i>Nomada</i> | <i>Nomada stigma</i>      |
| FBAPD75611   | <i>Nomada</i> | <i>Nomada stigma</i>      |
| BEEEE17115   | <i>Nomada</i> | <i>Nomada striata</i>     |
| FBAPB30209   | <i>Nomada</i> | <i>Nomada striata</i>     |
| FBAPB30309   | <i>Nomada</i> | <i>Nomada striata</i>     |
| FBAPB30409   | <i>Nomada</i> | <i>Nomada striata</i>     |
| FBAPC51611   | <i>Nomada</i> | <i>Nomada striata</i>     |
| FBAPC88111   | <i>Nomada</i> | <i>Nomada striata</i>     |
| FBAPD21311   | <i>Nomada</i> | <i>Nomada striata</i>     |
| FBAPD21411   | <i>Nomada</i> | <i>Nomada striata</i>     |
| GBACU31312   | <i>Nomada</i> | <i>Nomada striata</i>     |
| POLLE349219  | <i>Nomada</i> | <i>Nomada striata</i>     |
| BEECA06806   | <i>Nomada</i> | <i>Nomada subrutila</i>   |
| BEECA06906   | <i>Nomada</i> | <i>Nomada subrutila</i>   |
| CNROK130913  | <i>Nomada</i> | <i>Nomada subrutila</i>   |
| HCBNS10003   | <i>Nomada</i> | <i>Nomada subrutila</i>   |
| HCBNS10203   | <i>Nomada</i> | <i>Nomada subrutila</i>   |
| HPPPF106213  | <i>Nomada</i> | <i>Nomada subrutila</i>   |
| RRMFA25615   | <i>Nomada</i> | <i>Nomada subrutila</i>   |
| SMTPB1126713 | <i>Nomada</i> | <i>Nomada subrutila</i>   |
| FBAPC16410   | <i>Nomada</i> | <i>Nomada succincta</i>   |
| FBAPC16510   | <i>Nomada</i> | <i>Nomada succincta</i>   |
| FBHAP45709   | <i>Nomada</i> | <i>Nomada succincta</i>   |
| FBHAP45809   | <i>Nomada</i> | <i>Nomada succincta</i>   |
| FBHAP45909   | <i>Nomada</i> | <i>Nomada succincta</i>   |
| FBHAP46009   | <i>Nomada</i> | <i>Nomada succincta</i>   |



|              |                       |                                 |                            |
|--------------|-----------------------|---------------------------------|----------------------------|
| GBACU201312  | <i>Nomada</i>         | <i>Nomada succincta</i>         |                            |
| GBACU201412  | <i>Nomada</i>         | <i>Nomada succincta</i>         |                            |
| GBACU201512  | <i>Nomada</i>         | <i>Nomada succincta</i>         |                            |
| GBACU201612  | <i>Nomada</i>         | <i>Nomada succincta</i>         |                            |
| GBACU201712  | <i>Nomada</i>         | <i>Nomada succincta</i>         |                            |
| GBACU201812  | <i>Nomada</i>         | <i>Nomada succincta</i>         |                            |
| GBACU201912  | <i>Nomada</i>         | <i>Nomada succincta</i>         |                            |
| GBACU136512  | <i>Nomada</i>         | <i>Nomada symphyti</i>          |                            |
| BBHYA146412  | <i>Nomada</i>         | <i>Nomada texana</i>            |                            |
| BEECA52506   | <i>Nomada</i>         | <i>Nomada texana</i>            |                            |
| BEECB77907   | <i>Nomada</i>         | <i>Nomada texana</i>            |                            |
| BEECC15508   | <i>Nomada</i>         | <i>Nomada texana</i>            |                            |
| BEECC41508   | <i>Nomada</i>         | <i>Nomada texana</i>            |                            |
| BEECC42208   | <i>Nomada</i>         | <i>Nomada texana</i>            |                            |
| HMBME16507   | <i>Nomada</i>         | <i>Nomada texana</i>            |                            |
| BEECB17507   | <i>Nomada</i>         | <i>Nomada tibialis</i>          |                            |
| GBHAP02713   | <i>Nomada</i>         | <i>Nomada tiftonensis</i>       |                            |
| GBHAP02813   | <i>Nomada</i>         | <i>Nomada tiftonensis</i>       |                            |
| GBHAP02913   | <i>Nomada</i>         | <i>Nomada tiftonensis</i>       |                            |
| GBHAP03013   | <i>Nomada</i>         | <i>Nomada tiftonensis</i>       |                            |
| GBHAP03113   | <i>Nomada</i>         | <i>Nomada tiftonensis</i>       |                            |
| GBHAP03213   | <i>Nomada</i>         | <i>Nomada tiftonensis</i>       |                            |
| GBHAP03313   | <i>Nomada</i>         | <i>Nomada tiftonensis</i>       |                            |
| BUSA40005    | <i>Nomada</i>         | <i>Nomada valida</i>            |                            |
| BUSA06005    | <i>Nomada</i>         | <i>Nomada vegana</i>            |                            |
| BEECA05306   | <i>Nomada</i>         | <i>Nomada vicina</i>            |                            |
| BEECA63006   | <i>Nomada</i>         | <i>Nomada vicina</i>            |                            |
| BEECA63106   | <i>Nomada</i>         | <i>Nomada vicina</i>            |                            |
| BEECA63206   | <i>Nomada</i>         | <i>Nomada vicina</i>            |                            |
| CRHIC68316   | <i>Nomada</i>         | <i>Nomada vicina</i>            |                            |
| HDBNS21904   | <i>Nomada</i>         | <i>Nomada vicina</i>            |                            |
| BCHYM143213  | <i>Nomada</i>         | <i>Nomada villosa</i>           |                            |
| BCHYM143313  | <i>Nomada</i>         | <i>Nomada villosa</i>           |                            |
| FBAPB30709   | <i>Nomada</i>         | <i>Nomada zonata</i>            |                            |
| FBAPB30809   | <i>Nomada</i>         | <i>Nomada zonata</i>            |                            |
| FBAPB97609   | <i>Nomada</i>         | <i>Nomada zonata</i>            |                            |
| FBAPD20611   | <i>Nomada</i>         | <i>Nomada zonata</i>            |                            |
| GBACU165212  | <i>Nomada</i>         | <i>Nomada zonata</i>            |                            |
| GBACU165312  | <i>Nomada</i>         | <i>Nomada zonata</i>            |                            |
| GBACU165412  | <i>Nomada</i>         | <i>Nomada zonata</i>            |                            |
| GBMNB6185320 | <i>Oreopasites</i>    | <i>Oreopasites barbarae</i>     |                            |
| BUSA01405    | <i>Oreopasites</i>    | <i>Oreopasites vanduzeei</i>    |                            |
| DLII56607    | <i>Oreopasites</i>    | <i>Oreopasites vanduzeei</i>    |                            |
| GBMNB6219420 | <i>Paratetrapedia</i> | <i>Paratetrapedia connexa</i>   |                            |
| GBMNB6218220 | <i>Paratetrapedia</i> | <i>Paratetrapedia danunciae</i> | <i>Urbanapis danunciae</i> |
| GBMNB6220920 | <i>Paratetrapedia</i> | <i>Paratetrapedia danunciae</i> | <i>Urbanapis danunciae</i> |

|              |                       |                                  |                             |
|--------------|-----------------------|----------------------------------|-----------------------------|
| GBMNB6320120 | <i>Paratetrapedia</i> | <i>Paratetrapedia diamantina</i> | <i>Urbanapis diamantina</i> |
| GBMNB6221120 | <i>Paratetrapedia</i> | <i>Paratetrapedia duckei</i>     |                             |
| GBMNB6221320 | <i>Paratetrapedia</i> | <i>Paratetrapedia punctata</i>   |                             |
| GBMNB6218720 | <i>Paratetrapedia</i> | <i>Paratetrapedia volatilis</i>  |                             |
| GBAH1649919  | <i>Partamona</i>      | <i>Partamona bilineata</i>       |                             |
| GBMIN7328517 | <i>Partamona</i>      | <i>Partamona bilineata</i>       |                             |
| GBMIN7328617 | <i>Partamona</i>      | <i>Partamona bilineata</i>       |                             |
| GBMIN7328717 | <i>Partamona</i>      | <i>Partamona bilineata</i>       |                             |
| GBMIN7328817 | <i>Partamona</i>      | <i>Partamona bilineata</i>       |                             |
| GBMIN7328917 | <i>Partamona</i>      | <i>Partamona bilineata</i>       |                             |
| GBMIN7329017 | <i>Partamona</i>      | <i>Partamona bilineata</i>       |                             |
| GBMIN7329117 | <i>Partamona</i>      | <i>Partamona bilineata</i>       |                             |
| GBMIN7329217 | <i>Partamona</i>      | <i>Partamona bilineata</i>       |                             |
| GBMIN7329317 | <i>Partamona</i>      | <i>Partamona bilineata</i>       |                             |
| GBMIN7329417 | <i>Partamona</i>      | <i>Partamona bilineata</i>       |                             |
| GBMIN7329517 | <i>Partamona</i>      | <i>Partamona bilineata</i>       |                             |
| GBMIN7329617 | <i>Partamona</i>      | <i>Partamona bilineata</i>       |                             |
| GBMIN7329717 | <i>Partamona</i>      | <i>Partamona bilineata</i>       |                             |
| GBMIN7329817 | <i>Partamona</i>      | <i>Partamona bilineata</i>       |                             |
| GBMNB6319820 | <i>Partamona</i>      | <i>Partamona bilineata</i>       |                             |
| ASINH71212   | <i>Partamona</i>      | <i>Partamona grandipennis</i>    |                             |
| GBHAP52714   | <i>Partamona</i>      | <i>Partamona helleri</i>         |                             |
| GBHAP52814   | <i>Partamona</i>      | <i>Partamona helleri</i>         |                             |
| GBHAP52914   | <i>Partamona</i>      | <i>Partamona helleri</i>         |                             |
| GBHAP16813   | <i>Partamona</i>      | <i>Partamona mulata</i>          |                             |
| GBHAP16913   | <i>Partamona</i>      | <i>Partamona mulata</i>          |                             |
| GBHAP17013   | <i>Partamona</i>      | <i>Partamona mulata</i>          |                             |
| GBHAP17113   | <i>Partamona</i>      | <i>Partamona mulata</i>          |                             |
| GBHAP17213   | <i>Partamona</i>      | <i>Partamona mulata</i>          |                             |
| GBHAP17313   | <i>Partamona</i>      | <i>Partamona mulata</i>          |                             |
| GBHAP17413   | <i>Partamona</i>      | <i>Partamona mulata</i>          |                             |
| GBHAP17513   | <i>Partamona</i>      | <i>Partamona mulata</i>          |                             |
| GBHAP17613   | <i>Partamona</i>      | <i>Partamona mulata</i>          |                             |
| GBHAP17713   | <i>Partamona</i>      | <i>Partamona mulata</i>          |                             |
| GBHAP17813   | <i>Partamona</i>      | <i>Partamona mulata</i>          |                             |
| GBHAP17913   | <i>Partamona</i>      | <i>Partamona mulata</i>          |                             |
| GBHAP18013   | <i>Partamona</i>      | <i>Partamona mulata</i>          |                             |
| GBHAP18113   | <i>Partamona</i>      | <i>Partamona mulata</i>          |                             |
| GBHAP18213   | <i>Partamona</i>      | <i>Partamona mulata</i>          |                             |
| GBHAP18313   | <i>Partamona</i>      | <i>Partamona mulata</i>          |                             |
| GBHAP18413   | <i>Partamona</i>      | <i>Partamona mulata</i>          |                             |
| GBHAP18513   | <i>Partamona</i>      | <i>Partamona mulata</i>          |                             |
| GBHAP18613   | <i>Partamona</i>      | <i>Partamona mulata</i>          |                             |
| GBHAP18713   | <i>Partamona</i>      | <i>Partamona mulata</i>          |                             |
| GBHAP18813   | <i>Partamona</i>      | <i>Partamona mulata</i>          |                             |
| GBHAP18913   | <i>Partamona</i>      | <i>Partamona mulata</i>          |                             |

|            |                  |                               |
|------------|------------------|-------------------------------|
| GBHAP19013 | <i>Partamona</i> | <i>Partamona mulata</i>       |
| GBHAP19113 | <i>Partamona</i> | <i>Partamona mulata</i>       |
| GBHAP19213 | <i>Partamona</i> | <i>Partamona mulata</i>       |
| GBHAP19313 | <i>Partamona</i> | <i>Partamona mulata</i>       |
| GBHAP19413 | <i>Partamona</i> | <i>Partamona mulata</i>       |
| GBHAP19513 | <i>Partamona</i> | <i>Partamona mulata</i>       |
| GBHAP19613 | <i>Partamona</i> | <i>Partamona mulata</i>       |
| GBHAP19713 | <i>Partamona</i> | <i>Partamona mulata</i>       |
| GBHAP19813 | <i>Partamona</i> | <i>Partamona mulata</i>       |
| GBHAP19913 | <i>Partamona</i> | <i>Partamona mulata</i>       |
| GBHAP20013 | <i>Partamona</i> | <i>Partamona mulata</i>       |
| GBHAP20113 | <i>Partamona</i> | <i>Partamona mulata</i>       |
| GBHAP20213 | <i>Partamona</i> | <i>Partamona mulata</i>       |
| GBHAP20313 | <i>Partamona</i> | <i>Partamona mulata</i>       |
| GBHAP20413 | <i>Partamona</i> | <i>Partamona mulata</i>       |
| GBHAP20513 | <i>Partamona</i> | <i>Partamona mulata</i>       |
| GBHAP20613 | <i>Partamona</i> | <i>Partamona mulata</i>       |
| GBHAP20713 | <i>Partamona</i> | <i>Partamona mulata</i>       |
| GBHAP20813 | <i>Partamona</i> | <i>Partamona mulata</i>       |
| GBHAP20913 | <i>Partamona</i> | <i>Partamona mulata</i>       |
| GBHAP21013 | <i>Partamona</i> | <i>Partamona mulata</i>       |
| GBHAP21113 | <i>Partamona</i> | <i>Partamona mulata</i>       |
| GBHAP21213 | <i>Partamona</i> | <i>Partamona mulata</i>       |
| GBHAP21313 | <i>Partamona</i> | <i>Partamona mulata</i>       |
| GBHAP21413 | <i>Partamona</i> | <i>Partamona mulata</i>       |
| GBHAP21513 | <i>Partamona</i> | <i>Partamona mulata</i>       |
| GBHAP53014 | <i>Partamona</i> | <i>Partamona mulata</i>       |
| GBHAP53114 | <i>Partamona</i> | <i>Partamona mulata</i>       |
| ASINH71812 | <i>Partamona</i> | <i>Partamona musarum</i>      |
| ASINH72012 | <i>Partamona</i> | <i>Partamona musarum</i>      |
| ASINH72612 | <i>Partamona</i> | <i>Partamona musarum</i>      |
| ASINH72812 | <i>Partamona</i> | <i>Partamona orizabaensis</i> |
| ASINH72912 | <i>Partamona</i> | <i>Partamona orizabaensis</i> |
| ASINH73012 | <i>Partamona</i> | <i>Partamona orizabaensis</i> |
| ASINH73112 | <i>Partamona</i> | <i>Partamona orizabaensis</i> |
| ASINH73212 | <i>Partamona</i> | <i>Partamona orizabaensis</i> |
| ASINH73312 | <i>Partamona</i> | <i>Partamona orizabaensis</i> |
| ASINH73412 | <i>Partamona</i> | <i>Partamona orizabaensis</i> |
| ASINH73612 | <i>Partamona</i> | <i>Partamona orizabaensis</i> |
| GMCEE10314 | <i>Partamona</i> | <i>Partamona orizabaensis</i> |
| GMHKN24115 | <i>Partamona</i> | <i>Partamona orizabaensis</i> |
| GMHKN24215 | <i>Partamona</i> | <i>Partamona orizabaensis</i> |
| GMHMA56815 | <i>Partamona</i> | <i>Partamona orizabaensis</i> |
| GMHMA56915 | <i>Partamona</i> | <i>Partamona orizabaensis</i> |
| GMHMA57015 | <i>Partamona</i> | <i>Partamona orizabaensis</i> |
| GMHMA57115 | <i>Partamona</i> | <i>Partamona orizabaensis</i> |

|              |                  |                                |                                   |
|--------------|------------------|--------------------------------|-----------------------------------|
| GMHMA57215   | <i>Partamona</i> | <i>Partamona orizabaensis</i>  |                                   |
| GMHMA57315   | <i>Partamona</i> | <i>Partamona orizabaensis</i>  |                                   |
| GMHMI00815   | <i>Partamona</i> | <i>Partamona orizabaensis</i>  |                                   |
| GMHMQ00415   | <i>Partamona</i> | <i>Partamona orizabaensis</i>  |                                   |
| GMHMQ00515   | <i>Partamona</i> | <i>Partamona orizabaensis</i>  |                                   |
| GMHMQ05215   | <i>Partamona</i> | <i>Partamona orizabaensis</i>  |                                   |
| GMHMQ05615   | <i>Partamona</i> | <i>Partamona orizabaensis</i>  |                                   |
| JICCA135416  | <i>Partamona</i> | <i>Partamona orizabaensis</i>  |                                   |
| JICCE15016   | <i>Partamona</i> | <i>Partamona orizabaensis</i>  |                                   |
| JICCH17016   | <i>Partamona</i> | <i>Partamona orizabaensis</i>  |                                   |
| JICCX26816   | <i>Partamona</i> | <i>Partamona orizabaensis</i>  |                                   |
| BOFWM08908   | <i>Eucera</i>    | <i>Eucera azteca</i>           | <i>Peponapis azteca</i>           |
| SICOB68218   | <i>Eucera</i>    | <i>Eucera citrullina</i>       | <i>Peponapis citrullina</i>       |
| BOFTW16508   | <i>Eucera</i>    | <i>Eucera fervens</i>          | <i>Peponapis fervens</i>          |
| BOFWM08708   | <i>Eucera</i>    | <i>Eucera michelbacherorum</i> | <i>Peponapis michelbacherorum</i> |
| PIMA12019    | <i>Eucera</i>    | <i>Eucera michelbacherorum</i> | <i>Peponapis michelbacherorum</i> |
| BOFWM09008   | <i>Eucera</i>    | <i>Eucera pacifica</i>         | <i>Peponapis pacifica</i>         |
| BOFWM09108   | <i>Eucera</i>    | <i>Eucera pacifica</i>         | <i>Peponapis pacifica</i>         |
| BOFWM09208   | <i>Eucera</i>    | <i>Eucera pacifica</i>         | <i>Peponapis pacifica</i>         |
| SICOB68318   | <i>Eucera</i>    | <i>Eucera pruinosa</i>         | <i>Peponapis pruinosa</i>         |
| GBAH619609   | <i>Plebeia</i>   | <i>Plebeia franki</i>          |                                   |
| ASINH73812   | <i>Plebeia</i>   | <i>Plebeia frontalis</i>       |                                   |
| ASINH74012   | <i>Plebeia</i>   | <i>Plebeia frontalis</i>       |                                   |
| ASINH74112   | <i>Plebeia</i>   | <i>Plebeia frontalis</i>       |                                   |
| ASINH74412   | <i>Plebeia</i>   | <i>Plebeia frontalis</i>       |                                   |
| ASINH75112   | <i>Plebeia</i>   | <i>Plebeia frontalis</i>       |                                   |
| GMHMI10815   | <i>Plebeia</i>   | <i>Plebeia frontalis</i>       |                                   |
| GMHMS03916   | <i>Plebeia</i>   | <i>Plebeia frontalis</i>       |                                   |
| GMHMT40216   | <i>Plebeia</i>   | <i>Plebeia frontalis</i>       |                                   |
| GMMAC11515   | <i>Plebeia</i>   | <i>Plebeia frontalis</i>       |                                   |
| GMMCJ48414   | <i>Plebeia</i>   | <i>Plebeia frontalis</i>       |                                   |
| GMMCK10714   | <i>Plebeia</i>   | <i>Plebeia frontalis</i>       |                                   |
| GMMCK11314   | <i>Plebeia</i>   | <i>Plebeia frontalis</i>       |                                   |
| GMMCK14014   | <i>Plebeia</i>   | <i>Plebeia frontalis</i>       |                                   |
| GMMCK15914   | <i>Plebeia</i>   | <i>Plebeia frontalis</i>       |                                   |
| GMMCK93414   | <i>Plebeia</i>   | <i>Plebeia frontalis</i>       |                                   |
| GMMCK93714   | <i>Plebeia</i>   | <i>Plebeia frontalis</i>       |                                   |
| GMMCK93914   | <i>Plebeia</i>   | <i>Plebeia frontalis</i>       |                                   |
| GMMCO48915   | <i>Plebeia</i>   | <i>Plebeia frontalis</i>       |                                   |
| JCCCM40816   | <i>Plebeia</i>   | <i>Plebeia frontalis</i>       |                                   |
| JICCL33316   | <i>Plebeia</i>   | <i>Plebeia frontalis</i>       |                                   |
| ASINH75212   | <i>Plebeia</i>   | <i>Plebeia jatiformis</i>      |                                   |
| ASINH76312   | <i>Plebeia</i>   | <i>Plebeia pulchra</i>         |                                   |
| ASINH76612   | <i>Plebeia</i>   | <i>Plebeia pulchra</i>         |                                   |
| ASINH76712   | <i>Plebeia</i>   | <i>Plebeia pulchra</i>         |                                   |
| GBMIN1349613 | <i>Plebeia</i>   | <i>Plebeia remota</i>          |                                   |

|              |                |                       |
|--------------|----------------|-----------------------|
| GBMIN1349713 | <i>Plebeia</i> | <i>Plebeia remota</i> |
| GBMIN1349813 | <i>Plebeia</i> | <i>Plebeia remota</i> |
| GBMIN1349913 | <i>Plebeia</i> | <i>Plebeia remota</i> |
| GBMIN1350013 | <i>Plebeia</i> | <i>Plebeia remota</i> |
| GBMIN1350113 | <i>Plebeia</i> | <i>Plebeia remota</i> |
| GBMIN1350213 | <i>Plebeia</i> | <i>Plebeia remota</i> |
| GBMIN1350313 | <i>Plebeia</i> | <i>Plebeia remota</i> |
| GBMIN1350413 | <i>Plebeia</i> | <i>Plebeia remota</i> |
| GBMIN1350513 | <i>Plebeia</i> | <i>Plebeia remota</i> |
| GBMIN1350613 | <i>Plebeia</i> | <i>Plebeia remota</i> |
| GBMIN1350713 | <i>Plebeia</i> | <i>Plebeia remota</i> |
| GBMIN1350813 | <i>Plebeia</i> | <i>Plebeia remota</i> |
| GBMIN1350913 | <i>Plebeia</i> | <i>Plebeia remota</i> |
| GBMIN1351013 | <i>Plebeia</i> | <i>Plebeia remota</i> |
| GBMIN1351113 | <i>Plebeia</i> | <i>Plebeia remota</i> |
| GBMIN1351213 | <i>Plebeia</i> | <i>Plebeia remota</i> |
| GBMIN1351313 | <i>Plebeia</i> | <i>Plebeia remota</i> |
| GBMIN1351413 | <i>Plebeia</i> | <i>Plebeia remota</i> |
| GBMIN1351513 | <i>Plebeia</i> | <i>Plebeia remota</i> |
| GBMIN1351613 | <i>Plebeia</i> | <i>Plebeia remota</i> |
| GBMIN1351713 | <i>Plebeia</i> | <i>Plebeia remota</i> |
| GBMIN1351813 | <i>Plebeia</i> | <i>Plebeia remota</i> |
| GBMIN1351913 | <i>Plebeia</i> | <i>Plebeia remota</i> |
| GBMIN1352013 | <i>Plebeia</i> | <i>Plebeia remota</i> |
| GBMIN1352113 | <i>Plebeia</i> | <i>Plebeia remota</i> |
| GBMIN1352213 | <i>Plebeia</i> | <i>Plebeia remota</i> |
| GBMIN1352313 | <i>Plebeia</i> | <i>Plebeia remota</i> |
| GBMIN1352413 | <i>Plebeia</i> | <i>Plebeia remota</i> |
| GBMIN1352513 | <i>Plebeia</i> | <i>Plebeia remota</i> |
| GBMIN1352613 | <i>Plebeia</i> | <i>Plebeia remota</i> |
| GBMIN1352713 | <i>Plebeia</i> | <i>Plebeia remota</i> |
| GBMIN1352813 | <i>Plebeia</i> | <i>Plebeia remota</i> |
| GBMIN1352913 | <i>Plebeia</i> | <i>Plebeia remota</i> |
| GBMIN1353013 | <i>Plebeia</i> | <i>Plebeia remota</i> |
| GBMIN1353113 | <i>Plebeia</i> | <i>Plebeia remota</i> |
| GBMIN1353213 | <i>Plebeia</i> | <i>Plebeia remota</i> |
| GBMIN1353313 | <i>Plebeia</i> | <i>Plebeia remota</i> |
| GBMIN1353413 | <i>Plebeia</i> | <i>Plebeia remota</i> |
| GBMIN1353513 | <i>Plebeia</i> | <i>Plebeia remota</i> |
| GBMIN1353613 | <i>Plebeia</i> | <i>Plebeia remota</i> |
| GBMIN1353713 | <i>Plebeia</i> | <i>Plebeia remota</i> |
| GBMIN1353813 | <i>Plebeia</i> | <i>Plebeia remota</i> |
| GBMIN1353913 | <i>Plebeia</i> | <i>Plebeia remota</i> |
| GBMIN1354013 | <i>Plebeia</i> | <i>Plebeia remota</i> |
| GBMIN1354113 | <i>Plebeia</i> | <i>Plebeia remota</i> |
| GBMIN1354213 | <i>Plebeia</i> | <i>Plebeia remota</i> |

|              |                      |                                  |
|--------------|----------------------|----------------------------------|
| GBMIN1354313 | <i>Plebeia</i>       | <i>Plebeia remota</i>            |
| GBMIN1354413 | <i>Plebeia</i>       | <i>Plebeia remota</i>            |
| GBMIN1354513 | <i>Plebeia</i>       | <i>Plebeia remota</i>            |
| GBMIN1354613 | <i>Plebeia</i>       | <i>Plebeia remota</i>            |
| GBMIN1354713 | <i>Plebeia</i>       | <i>Plebeia remota</i>            |
| GBMIN1354813 | <i>Plebeia</i>       | <i>Plebeia remota</i>            |
| GBMIN1354913 | <i>Plebeia</i>       | <i>Plebeia remota</i>            |
| GBMIN1355013 | <i>Plebeia</i>       | <i>Plebeia remota</i>            |
| GBMIN1355113 | <i>Plebeia</i>       | <i>Plebeia remota</i>            |
| GBMIN1355213 | <i>Plebeia</i>       | <i>Plebeia remota</i>            |
| GBMIN1355313 | <i>Plebeia</i>       | <i>Plebeia remota</i>            |
| GBMIN1355413 | <i>Plebeia</i>       | <i>Plebeia remota</i>            |
| GBMIN1355513 | <i>Plebeia</i>       | <i>Plebeia remota</i>            |
| GBMIN1355613 | <i>Plebeia</i>       | <i>Plebeia remota</i>            |
| GBMIN1355713 | <i>Plebeia</i>       | <i>Plebeia remota</i>            |
| GBMIN1355813 | <i>Plebeia</i>       | <i>Plebeia remota</i>            |
| GBMIN1355913 | <i>Plebeia</i>       | <i>Plebeia remota</i>            |
| GBMIN1356013 | <i>Plebeia</i>       | <i>Plebeia remota</i>            |
| BBHYA03912   | <i>Ptilothrix</i>    | <i>Ptilothrix bombiformis</i>    |
| BBHYA04712   | <i>Ptilothrix</i>    | <i>Ptilothrix bombiformis</i>    |
| BBHYA04812   | <i>Ptilothrix</i>    | <i>Ptilothrix bombiformis</i>    |
| BBHYA08212   | <i>Ptilothrix</i>    | <i>Ptilothrix bombiformis</i>    |
| BBHYA08312   | <i>Ptilothrix</i>    | <i>Ptilothrix bombiformis</i>    |
| BBHYA56112   | <i>Ptilothrix</i>    | <i>Ptilothrix bombiformis</i>    |
| BEECA35006   | <i>Ptilothrix</i>    | <i>Ptilothrix bombiformis</i>    |
| BEECA35106   | <i>Ptilothrix</i>    | <i>Ptilothrix bombiformis</i>    |
| BUSA15505    | <i>Ptilothrix</i>    | <i>Ptilothrix bombiformis</i>    |
| BUSA15605    | <i>Ptilothrix</i>    | <i>Ptilothrix bombiformis</i>    |
| BUSA15705    | <i>Ptilothrix</i>    | <i>Ptilothrix bombiformis</i>    |
| GBMNA2183319 | <i>Ptilothrix</i>    | <i>Ptilothrix bombiformis</i>    |
| SICOB66718   | <i>Ptilothrix</i>    | <i>Ptilothrix bombiformis</i>    |
| SICOB66818   | <i>Ptilothrix</i>    | <i>Ptilothrix bombiformis</i>    |
| BOFTW15908   | <i>Ptilothrix</i>    | <i>Ptilothrix nemoralis</i>      |
| BOFTW06108   | <i>Ptilothrix</i>    | <i>Ptilothrix relata</i>         |
| BOFTW15808   | <i>Ptilothrix</i>    | <i>Ptilothrix relata</i>         |
| BBHYA96512   | <i>Ptilothrix</i>    | <i>Ptilothrix sumichrasti</i>    |
| ASINH76912   | <i>Ptilotrigona</i>  | <i>Ptilotrigona occidentalis</i> |
| ASINH77012   | <i>Ptilotrigona</i>  | <i>Ptilotrigona occidentalis</i> |
| ASINH77112   | <i>Ptilotrigona</i>  | <i>Ptilotrigona occidentalis</i> |
| ASINH77412   | <i>Ptilotrigona</i>  | <i>Ptilotrigona occidentalis</i> |
| GBAH1651619  | <i>Scaptotrigona</i> | <i>Scaptotrigona hellwegeri</i>  |
| GBAH1651719  | <i>Scaptotrigona</i> | <i>Scaptotrigona hellwegeri</i>  |
| GBAH1651819  | <i>Scaptotrigona</i> | <i>Scaptotrigona hellwegeri</i>  |
| GBMIN1830213 | <i>Scaptotrigona</i> | <i>Scaptotrigona hellwegeri</i>  |
| GBMIN1830313 | <i>Scaptotrigona</i> | <i>Scaptotrigona hellwegeri</i>  |
| GBMIN1835813 | <i>Scaptotrigona</i> | <i>Scaptotrigona hellwegeri</i>  |

|              |                      |                                  |
|--------------|----------------------|----------------------------------|
| GBMIN7329917 | <i>Scaptotrigona</i> | <i>Scaptotrigona hellwegeri</i>  |
| GBMIN7330017 | <i>Scaptotrigona</i> | <i>Scaptotrigona hellwegeri</i>  |
| GBMIN7330117 | <i>Scaptotrigona</i> | <i>Scaptotrigona hellwegeri</i>  |
| GBMIN7330217 | <i>Scaptotrigona</i> | <i>Scaptotrigona hellwegeri</i>  |
| GBMIN7330317 | <i>Scaptotrigona</i> | <i>Scaptotrigona hellwegeri</i>  |
| GBMIN7330417 | <i>Scaptotrigona</i> | <i>Scaptotrigona hellwegeri</i>  |
| GBMIN7330517 | <i>Scaptotrigona</i> | <i>Scaptotrigona hellwegeri</i>  |
| GBMIN7330617 | <i>Scaptotrigona</i> | <i>Scaptotrigona hellwegeri</i>  |
| GBMIN7330717 | <i>Scaptotrigona</i> | <i>Scaptotrigona hellwegeri</i>  |
| GBMIN7330817 | <i>Scaptotrigona</i> | <i>Scaptotrigona hellwegeri</i>  |
| GBMIN7330917 | <i>Scaptotrigona</i> | <i>Scaptotrigona hellwegeri</i>  |
| GBMIN7331017 | <i>Scaptotrigona</i> | <i>Scaptotrigona hellwegeri</i>  |
| ASINH77612   | <i>Scaptotrigona</i> | <i>Scaptotrigona luteipennis</i> |
| ASINH77712   | <i>Scaptotrigona</i> | <i>Scaptotrigona luteipennis</i> |
| ASINH77812   | <i>Scaptotrigona</i> | <i>Scaptotrigona luteipennis</i> |
| ASINH77912   | <i>Scaptotrigona</i> | <i>Scaptotrigona luteipennis</i> |
| ASINH78012   | <i>Scaptotrigona</i> | <i>Scaptotrigona luteipennis</i> |
| ASINH78112   | <i>Scaptotrigona</i> | <i>Scaptotrigona luteipennis</i> |
| JICCO81316   | <i>Scaptotrigona</i> | <i>Scaptotrigona luteipennis</i> |
| GBAH1651919  | <i>Scaptotrigona</i> | <i>Scaptotrigona mexicana</i>    |
| GBAH1652019  | <i>Scaptotrigona</i> | <i>Scaptotrigona mexicana</i>    |
| GBAH1652119  | <i>Scaptotrigona</i> | <i>Scaptotrigona mexicana</i>    |
| GBAH1652219  | <i>Scaptotrigona</i> | <i>Scaptotrigona mexicana</i>    |
| GBAH1652319  | <i>Scaptotrigona</i> | <i>Scaptotrigona mexicana</i>    |
| GBAH1652419  | <i>Scaptotrigona</i> | <i>Scaptotrigona mexicana</i>    |
| GBMIN1829613 | <i>Scaptotrigona</i> | <i>Scaptotrigona mexicana</i>    |
| GBMIN1829713 | <i>Scaptotrigona</i> | <i>Scaptotrigona mexicana</i>    |
| GBMIN1829813 | <i>Scaptotrigona</i> | <i>Scaptotrigona mexicana</i>    |
| GBMIN1829913 | <i>Scaptotrigona</i> | <i>Scaptotrigona mexicana</i>    |
| GBMIN1830013 | <i>Scaptotrigona</i> | <i>Scaptotrigona mexicana</i>    |
| GBMIN1830113 | <i>Scaptotrigona</i> | <i>Scaptotrigona mexicana</i>    |
| GBMIN1835213 | <i>Scaptotrigona</i> | <i>Scaptotrigona mexicana</i>    |
| GBMIN1835313 | <i>Scaptotrigona</i> | <i>Scaptotrigona mexicana</i>    |
| GBMIN1835413 | <i>Scaptotrigona</i> | <i>Scaptotrigona mexicana</i>    |
| GBMIN1835513 | <i>Scaptotrigona</i> | <i>Scaptotrigona mexicana</i>    |
| GBMIN1835613 | <i>Scaptotrigona</i> | <i>Scaptotrigona mexicana</i>    |
| GBMIN1835713 | <i>Scaptotrigona</i> | <i>Scaptotrigona mexicana</i>    |
| GBMIN7331117 | <i>Scaptotrigona</i> | <i>Scaptotrigona mexicana</i>    |
| GBMIN7331217 | <i>Scaptotrigona</i> | <i>Scaptotrigona mexicana</i>    |
| GBMIN7331317 | <i>Scaptotrigona</i> | <i>Scaptotrigona mexicana</i>    |
| GBMIN7331417 | <i>Scaptotrigona</i> | <i>Scaptotrigona mexicana</i>    |
| GBMIN7331517 | <i>Scaptotrigona</i> | <i>Scaptotrigona mexicana</i>    |
| GBMIN7331617 | <i>Scaptotrigona</i> | <i>Scaptotrigona mexicana</i>    |
| GBMIN7331717 | <i>Scaptotrigona</i> | <i>Scaptotrigona mexicana</i>    |
| GBMIN7331817 | <i>Scaptotrigona</i> | <i>Scaptotrigona mexicana</i>    |
| GBMIN7331917 | <i>Scaptotrigona</i> | <i>Scaptotrigona mexicana</i>    |

|              |                      |                                 |
|--------------|----------------------|---------------------------------|
| GBMIN7332017 | <i>Scaptotrigona</i> | <i>Scaptotrigona mexicana</i>   |
| GBMIN7332117 | <i>Scaptotrigona</i> | <i>Scaptotrigona mexicana</i>   |
| GBMIN7332217 | <i>Scaptotrigona</i> | <i>Scaptotrigona mexicana</i>   |
| GBMIN7332317 | <i>Scaptotrigona</i> | <i>Scaptotrigona mexicana</i>   |
| GBMIN7332417 | <i>Scaptotrigona</i> | <i>Scaptotrigona mexicana</i>   |
| GBMIN7332517 | <i>Scaptotrigona</i> | <i>Scaptotrigona mexicana</i>   |
| GBMIN7332617 | <i>Scaptotrigona</i> | <i>Scaptotrigona mexicana</i>   |
| GBMIN7332717 | <i>Scaptotrigona</i> | <i>Scaptotrigona mexicana</i>   |
| GBMIN7332817 | <i>Scaptotrigona</i> | <i>Scaptotrigona mexicana</i>   |
| GBMIN7332917 | <i>Scaptotrigona</i> | <i>Scaptotrigona mexicana</i>   |
| GBMIN7333017 | <i>Scaptotrigona</i> | <i>Scaptotrigona mexicana</i>   |
| GBMIN7333117 | <i>Scaptotrigona</i> | <i>Scaptotrigona mexicana</i>   |
| GBMIN7333217 | <i>Scaptotrigona</i> | <i>Scaptotrigona mexicana</i>   |
| GBMIN7333317 | <i>Scaptotrigona</i> | <i>Scaptotrigona mexicana</i>   |
| ASINH78312   | <i>Scaptotrigona</i> | <i>Scaptotrigona pectoralis</i> |
| ASINH78412   | <i>Scaptotrigona</i> | <i>Scaptotrigona pectoralis</i> |
| ASINH78512   | <i>Scaptotrigona</i> | <i>Scaptotrigona pectoralis</i> |
| ASINH78612   | <i>Scaptotrigona</i> | <i>Scaptotrigona pectoralis</i> |
| ASINH78712   | <i>Scaptotrigona</i> | <i>Scaptotrigona pectoralis</i> |
| ASINH78812   | <i>Scaptotrigona</i> | <i>Scaptotrigona pectoralis</i> |
| ASINH78912   | <i>Scaptotrigona</i> | <i>Scaptotrigona pectoralis</i> |
| ASINH79012   | <i>Scaptotrigona</i> | <i>Scaptotrigona pectoralis</i> |
| GBAH1650319  | <i>Scaptotrigona</i> | <i>Scaptotrigona pectoralis</i> |
| GBAH1650419  | <i>Scaptotrigona</i> | <i>Scaptotrigona pectoralis</i> |
| GBAH1650519  | <i>Scaptotrigona</i> | <i>Scaptotrigona pectoralis</i> |
| GBMIN1829313 | <i>Scaptotrigona</i> | <i>Scaptotrigona pectoralis</i> |
| GBMIN1829413 | <i>Scaptotrigona</i> | <i>Scaptotrigona pectoralis</i> |
| GBMIN1829513 | <i>Scaptotrigona</i> | <i>Scaptotrigona pectoralis</i> |
| GBMIN1834813 | <i>Scaptotrigona</i> | <i>Scaptotrigona pectoralis</i> |
| GBMIN1834913 | <i>Scaptotrigona</i> | <i>Scaptotrigona pectoralis</i> |
| GBMIN1835013 | <i>Scaptotrigona</i> | <i>Scaptotrigona pectoralis</i> |
| GBMIN1835113 | <i>Scaptotrigona</i> | <i>Scaptotrigona pectoralis</i> |
| GBMIN7333417 | <i>Scaptotrigona</i> | <i>Scaptotrigona pectoralis</i> |
| GBMIN7333517 | <i>Scaptotrigona</i> | <i>Scaptotrigona pectoralis</i> |
| GBMIN7333617 | <i>Scaptotrigona</i> | <i>Scaptotrigona pectoralis</i> |
| GBMIN7333717 | <i>Scaptotrigona</i> | <i>Scaptotrigona pectoralis</i> |
| GBMIN7333817 | <i>Scaptotrigona</i> | <i>Scaptotrigona pectoralis</i> |
| GBMIN7333917 | <i>Scaptotrigona</i> | <i>Scaptotrigona pectoralis</i> |
| GBMIN7334017 | <i>Scaptotrigona</i> | <i>Scaptotrigona pectoralis</i> |
| GBMIN7334117 | <i>Scaptotrigona</i> | <i>Scaptotrigona pectoralis</i> |
| GBMIN7334217 | <i>Scaptotrigona</i> | <i>Scaptotrigona pectoralis</i> |
| GBMIN7334317 | <i>Scaptotrigona</i> | <i>Scaptotrigona pectoralis</i> |
| GBMIN7334417 | <i>Scaptotrigona</i> | <i>Scaptotrigona pectoralis</i> |
| GBMIN7334517 | <i>Scaptotrigona</i> | <i>Scaptotrigona pectoralis</i> |
| GBMIN7334617 | <i>Scaptotrigona</i> | <i>Scaptotrigona pectoralis</i> |
| GBMIN7334717 | <i>Scaptotrigona</i> | <i>Scaptotrigona pectoralis</i> |



|               |                      |                                       |
|---------------|----------------------|---------------------------------------|
| GBMIN7334817  | <i>Scaptotrigona</i> | <i>Scaptotrigona pectoralis</i>       |
| GBMIN7334917  | <i>Scaptotrigona</i> | <i>Scaptotrigona pectoralis</i>       |
| GBMIN7335017  | <i>Scaptotrigona</i> | <i>Scaptotrigona pectoralis</i>       |
| GBMIN7335117  | <i>Scaptotrigona</i> | <i>Scaptotrigona pectoralis</i>       |
| GBMIN7335217  | <i>Scaptotrigona</i> | <i>Scaptotrigona pectoralis</i>       |
| GBMIN7335317  | <i>Scaptotrigona</i> | <i>Scaptotrigona pectoralis</i>       |
| GBMIN7335417  | <i>Scaptotrigona</i> | <i>Scaptotrigona pectoralis</i>       |
| GBMNB6319920  | <i>Scaptotrigona</i> | <i>Scaptotrigona pectoralis</i>       |
| GBAH619309    | <i>Scaptotrigona</i> | <i>Scaptotrigona polysticta</i>       |
| DRBEE15007    | <i>Scaptotrigona</i> | <i>Scaptotrigona postica</i>          |
| GBHAP53314    | <i>Scaptotrigona</i> | <i>Scaptotrigona postica</i>          |
| ASINH79112    | <i>Scaptotrigona</i> | <i>Scaptotrigona subobscuripennis</i> |
| ASINH79212    | <i>Scaptotrigona</i> | <i>Scaptotrigona subobscuripennis</i> |
| ASINH79412    | <i>Scaptotrigona</i> | <i>Scaptotrigona subobscuripennis</i> |
| ASINH79512    | <i>Scaptotrigona</i> | <i>Scaptotrigona subobscuripennis</i> |
| ASINH79612    | <i>Scaptotrigona</i> | <i>Scaptotrigona subobscuripennis</i> |
| ASINH79712    | <i>Scaptotrigona</i> | <i>Scaptotrigona subobscuripennis</i> |
| ASINH79812    | <i>Scaptotrigona</i> | <i>Scaptotrigona subobscuripennis</i> |
| GMCDK05717    | <i>Scaptotrigona</i> | <i>Scaptotrigona subobscuripennis</i> |
| JCCCA02516    | <i>Scaptotrigona</i> | <i>Scaptotrigona subobscuripennis</i> |
| JICCG03016    | <i>Scaptotrigona</i> | <i>Scaptotrigona subobscuripennis</i> |
| JICCP22516    | <i>Scaptotrigona</i> | <i>Scaptotrigona subobscuripennis</i> |
| JICCR12216    | <i>Scaptotrigona</i> | <i>Scaptotrigona subobscuripennis</i> |
| JICCU12216    | <i>Scaptotrigona</i> | <i>Scaptotrigona subobscuripennis</i> |
| GBHAP53414    | <i>Scaptotrigona</i> | <i>Scaptotrigona xanthotricha</i>     |
| ASINH79912    | <i>Scaura</i>        | <i>Scaura argyrea</i>                 |
| GBHAP53514    | <i>Scaura</i>        | <i>Scaura atlantica</i>               |
| GBHAP53614    | <i>Scaura</i>        | <i>Scaura latitarsis</i>              |
| GBHAP53714    | <i>Scaura</i>        | <i>Scaura latitarsis</i>              |
| GBHAP53814    | <i>Scaura</i>        | <i>Scaura latitarsis</i>              |
| GBHAP53914    | <i>Scaura</i>        | <i>Scaura longula</i>                 |
| GBHAP54014    | <i>Scaura</i>        | <i>Scaura tenuis</i>                  |
| GBHAP54114    | <i>Scaura</i>        | <i>Scaura tenuis</i>                  |
| GBHAP54214    | <i>Scaura</i>        | <i>Scaura tenuis</i>                  |
| BEECA38806    | <i>Svastra</i>       | <i>Svastra aegis</i>                  |
| BEECC27008    | <i>Svastra</i>       | <i>Svastra atripes</i>                |
| BEECB67307    | <i>Svastra</i>       | <i>Svastra machaerantherae</i>        |
| GBMIN14274718 | <i>Svastra</i>       | <i>Svastra machaerantherae</i>        |
| BBHYA55412    | <i>Svastra</i>       | <i>Svastra obliqua</i>                |
| BBHYA55512    | <i>Svastra</i>       | <i>Svastra obliqua</i>                |
| BEECC65109    | <i>Svastra</i>       | <i>Svastra obliqua</i>                |
| BEECC65809    | <i>Svastra</i>       | <i>Svastra obliqua</i>                |
| GBMIN14274018 | <i>Svastra</i>       | <i>Svastra obliqua</i>                |
| GBMNB6185120  | <i>Svastra</i>       | <i>Svastra obliqua</i>                |
| BEECC43008    | <i>Svastra</i>       | <i>Svastra texana</i>                 |
| ASINH80712    | <i>Tetragona</i>     | <i>Tetragona perangulata</i>          |

|             |                     |                               |
|-------------|---------------------|-------------------------------|
| ASINH80912  | <i>Tetragona</i>    | <i>Tetragona perangulata</i>  |
| ASINH81012  | <i>Tetragona</i>    | <i>Tetragona perangulata</i>  |
| ASINH81312  | <i>Tetragona</i>    | <i>Tetragona perangulata</i>  |
| ASINH81412  | <i>Tetragona</i>    | <i>Tetragona perangulata</i>  |
| ASINH81512  | <i>Tetragona</i>    | <i>Tetragona perangulata</i>  |
| ASINH81812  | <i>Tetragona</i>    | <i>Tetragona zieglerei</i>    |
| ASINH81912  | <i>Tetragona</i>    | <i>Tetragona zieglerei</i>    |
| ASINH82112  | <i>Tetragona</i>    | <i>Tetragona zieglerei</i>    |
| ASINH82412  | <i>Tetragona</i>    | <i>Tetragona zieglerei</i>    |
| ASINH82512  | <i>Tetragona</i>    | <i>Tetragona zieglerei</i>    |
| ASINH82612  | <i>Tetragona</i>    | <i>Tetragona zieglerei</i>    |
| ASINH82712  | <i>Tetragonisca</i> | <i>Tetragonisca angustula</i> |
| ASINH82912  | <i>Tetragonisca</i> | <i>Tetragonisca angustula</i> |
| ASINH83012  | <i>Tetragonisca</i> | <i>Tetragonisca angustula</i> |
| ASINH83112  | <i>Tetragonisca</i> | <i>Tetragonisca angustula</i> |
| ASINH83212  | <i>Tetragonisca</i> | <i>Tetragonisca angustula</i> |
| ASINH83412  | <i>Tetragonisca</i> | <i>Tetragonisca angustula</i> |
| ASINH83512  | <i>Tetragonisca</i> | <i>Tetragonisca angustula</i> |
| ASINH83612  | <i>Tetragonisca</i> | <i>Tetragonisca angustula</i> |
| GBAH1374419 | <i>Tetragonisca</i> | <i>Tetragonisca angustula</i> |
| GBAH1374519 | <i>Tetragonisca</i> | <i>Tetragonisca angustula</i> |
| GBAH1374619 | <i>Tetragonisca</i> | <i>Tetragonisca angustula</i> |
| GBAH1374719 | <i>Tetragonisca</i> | <i>Tetragonisca angustula</i> |
| GBAH1374819 | <i>Tetragonisca</i> | <i>Tetragonisca angustula</i> |
| GBAH1374919 | <i>Tetragonisca</i> | <i>Tetragonisca angustula</i> |
| GBAH1375019 | <i>Tetragonisca</i> | <i>Tetragonisca angustula</i> |
| GBAH1375119 | <i>Tetragonisca</i> | <i>Tetragonisca angustula</i> |
| GBAH1375219 | <i>Tetragonisca</i> | <i>Tetragonisca angustula</i> |
| GBAH1375319 | <i>Tetragonisca</i> | <i>Tetragonisca angustula</i> |
| GBAH1375419 | <i>Tetragonisca</i> | <i>Tetragonisca angustula</i> |
| GBAH1375519 | <i>Tetragonisca</i> | <i>Tetragonisca angustula</i> |
| GBAH1375619 | <i>Tetragonisca</i> | <i>Tetragonisca angustula</i> |
| GBAH1375719 | <i>Tetragonisca</i> | <i>Tetragonisca angustula</i> |
| GBAH1375819 | <i>Tetragonisca</i> | <i>Tetragonisca angustula</i> |
| GBAH1375919 | <i>Tetragonisca</i> | <i>Tetragonisca angustula</i> |
| GBAH1376019 | <i>Tetragonisca</i> | <i>Tetragonisca angustula</i> |
| GBAH1376119 | <i>Tetragonisca</i> | <i>Tetragonisca angustula</i> |
| GBAH1376219 | <i>Tetragonisca</i> | <i>Tetragonisca angustula</i> |
| GBAH1376319 | <i>Tetragonisca</i> | <i>Tetragonisca angustula</i> |
| GBAH1376419 | <i>Tetragonisca</i> | <i>Tetragonisca angustula</i> |
| GBAH1376519 | <i>Tetragonisca</i> | <i>Tetragonisca angustula</i> |
| GBAH1376619 | <i>Tetragonisca</i> | <i>Tetragonisca angustula</i> |
| GBAH1376719 | <i>Tetragonisca</i> | <i>Tetragonisca angustula</i> |
| GBAH1376819 | <i>Tetragonisca</i> | <i>Tetragonisca angustula</i> |
| GBAH1376919 | <i>Tetragonisca</i> | <i>Tetragonisca angustula</i> |
| GBAH1377019 | <i>Tetragonisca</i> | <i>Tetragonisca angustula</i> |















































|               |                     |                                |
|---------------|---------------------|--------------------------------|
| GBAH1473719   | <i>Tetragonisca</i> | <i>Tetragonisca angustula</i>  |
| GBAH1473819   | <i>Tetragonisca</i> | <i>Tetragonisca angustula</i>  |
| GBAH1473919   | <i>Tetragonisca</i> | <i>Tetragonisca angustula</i>  |
| GBAH1474019   | <i>Tetragonisca</i> | <i>Tetragonisca angustula</i>  |
| GBAH1474119   | <i>Tetragonisca</i> | <i>Tetragonisca angustula</i>  |
| GBAH1474219   | <i>Tetragonisca</i> | <i>Tetragonisca angustula</i>  |
| GBAH1474319   | <i>Tetragonisca</i> | <i>Tetragonisca angustula</i>  |
| GBAH1474419   | <i>Tetragonisca</i> | <i>Tetragonisca angustula</i>  |
| GBAH1474519   | <i>Tetragonisca</i> | <i>Tetragonisca angustula</i>  |
| GBAH1474619   | <i>Tetragonisca</i> | <i>Tetragonisca angustula</i>  |
| GBAH619709    | <i>Tetragonisca</i> | <i>Tetragonisca angustula</i>  |
| GBHAP54414    | <i>Tetragonisca</i> | <i>Tetragonisca angustula</i>  |
| GBHAP54514    | <i>Tetragonisca</i> | <i>Tetragonisca angustula</i>  |
| GMCAA101914   | <i>Tetragonisca</i> | <i>Tetragonisca angustula</i>  |
| GMCAA98114    | <i>Tetragonisca</i> | <i>Tetragonisca angustula</i>  |
| GMCAA99514    | <i>Tetragonisca</i> | <i>Tetragonisca angustula</i>  |
| JICBL27716    | <i>Tetragonisca</i> | <i>Tetragonisca angustula</i>  |
| JICGV30716    | <i>Tetragonisca</i> | <i>Tetragonisca angustula</i>  |
| ASINH83812    | <i>Tetragonisca</i> | <i>Tetragonisca buchwaldi</i>  |
| GBHAP54614    | <i>Tetragonisca</i> | <i>Tetragonisca fiebrigi</i>   |
| GBHAP54714    | <i>Tetragonisca</i> | <i>Tetragonisca weyrauchi</i>  |
| HYQT643-10    | <i>Tetragonula</i>  | <i>Tetragonula carbonaria</i>  |
| GBAH18571-19  | <i>Tetragonula</i>  | <i>Tetragonula iridipennis</i> |
| GBMIN14282218 | <i>Eucera</i>       | <i>Eucera caudata</i>          |
| BOWGF14508    | <i>Eucera</i>       | <i>Eucera fraterna</i>         |
| BOWGF14808    | <i>Eucera</i>       | <i>Eucera fraterna</i>         |
| GBMIN14281818 | <i>Eucera</i>       | <i>Eucera fraterna</i>         |
| GBMNB6251320  | <i>Eucera</i>       | <i>Eucera glauca</i>           |
| GBMIN14281918 | <i>Eucera</i>       | <i>Eucera laborosa</i>         |
| GBMIN14282118 | <i>Eucera</i>       | <i>Eucera macrognatha</i>      |
| FBAPB55409    | <i>Eucera</i>       | <i>Eucera malvae</i>           |
| FBAPB55609    | <i>Eucera</i>       | <i>Eucera malvae</i>           |
| FBAPC60411    | <i>Eucera</i>       | <i>Eucera malvae</i>           |
| FBAPC75011    | <i>Eucera</i>       | <i>Eucera malvae</i>           |
| FBAPC75211    | <i>Eucera</i>       | <i>Eucera malvae</i>           |
| FBAPD70511    | <i>Eucera</i>       | <i>Eucera malvae</i>           |
| FBAPD70611    | <i>Eucera</i>       | <i>Eucera malvae</i>           |
| FBAPD93811    | <i>Eucera</i>       | <i>Eucera malvae</i>           |
| FBAPD93911    | <i>Eucera</i>       | <i>Eucera malvae</i>           |
| FBAPD94011    | <i>Eucera</i>       | <i>Eucera malvae</i>           |
| GBACU329513   | <i>Eucera</i>       | <i>Eucera malvae</i>           |
| GBACU329613   | <i>Eucera</i>       | <i>Eucera malvae</i>           |
| GBACU329713   | <i>Eucera</i>       | <i>Eucera malvae</i>           |
| GBACU329813   | <i>Eucera</i>       | <i>Eucera malvae</i>           |
| GBACU329913   | <i>Eucera</i>       | <i>Eucera malvae</i>           |
| GBACU330013   | <i>Eucera</i>       | <i>Eucera malvae</i>           |



|               |               |                           |                                 |
|---------------|---------------|---------------------------|---------------------------------|
| GBACU330113   | <i>Eucera</i> | <i>Eucera malvae</i>      |                                 |
| POLLE153819   | <i>Eucera</i> | <i>Eucera malvae</i>      |                                 |
| POLLE169519   | <i>Eucera</i> | <i>Eucera malvae</i>      |                                 |
| POLLE176019   | <i>Eucera</i> | <i>Eucera malvae</i>      |                                 |
| POLLE182919   | <i>Eucera</i> | <i>Eucera malvae</i>      |                                 |
| POLLE193919   | <i>Eucera</i> | <i>Eucera malvae</i>      |                                 |
| POLLE194519   | <i>Eucera</i> | <i>Eucera malvae</i>      |                                 |
| POLLE195719   | <i>Eucera</i> | <i>Eucera malvae</i>      |                                 |
| POLLE196019   | <i>Eucera</i> | <i>Eucera malvae</i>      |                                 |
| POLLE196119   | <i>Eucera</i> | <i>Eucera malvae</i>      |                                 |
| POLLE196219   | <i>Eucera</i> | <i>Eucera malvae</i>      |                                 |
| POLLE196419   | <i>Eucera</i> | <i>Eucera malvae</i>      |                                 |
| POLLE237419   | <i>Eucera</i> | <i>Eucera malvae</i>      |                                 |
| POLLE239219   | <i>Eucera</i> | <i>Eucera malvae</i>      |                                 |
| POLLE239319   | <i>Eucera</i> | <i>Eucera malvae</i>      |                                 |
| POLLE239419   | <i>Eucera</i> | <i>Eucera malvae</i>      |                                 |
| POLLE242919   | <i>Eucera</i> | <i>Eucera malvae</i>      |                                 |
| POLLE251519   | <i>Eucera</i> | <i>Eucera malvae</i>      |                                 |
| POLLE255919   | <i>Eucera</i> | <i>Eucera malvae</i>      |                                 |
| POLLE258119   | <i>Eucera</i> | <i>Eucera malvae</i>      |                                 |
| POLLE258519   | <i>Eucera</i> | <i>Eucera malvae</i>      |                                 |
| GBMIN14281318 | <i>Eucera</i> | <i>Eucera alticincta</i>  |                                 |
| MNHNL00520    | <i>Eucera</i> | <i>Eucera alticincta</i>  |                                 |
| HMBME12307    | <i>Eucera</i> | <i>Eucera auricauda</i>   | <i>Tetraloniella auricauda</i>  |
| HMBME12407    | <i>Eucera</i> | <i>Eucera auricauda</i>   | <i>Tetraloniella auricauda</i>  |
| HMBME14507    | <i>Eucera</i> | <i>Eucera auricauda</i>   | <i>Tetraloniella auricauda</i>  |
| FBAPD71111    | <i>Eucera</i> | <i>Eucera dentata</i>     | <i>Tetraloniella dentata</i>    |
| FBAPD86711    | <i>Eucera</i> | <i>Eucera dentata</i>     | <i>Tetraloniella dentata</i>    |
| FBAPD86911    | <i>Eucera</i> | <i>Eucera dentata</i>     | <i>Tetraloniella dentata</i>    |
| FBAPD87011    | <i>Eucera</i> | <i>Eucera dentata</i>     | <i>Tetraloniella dentata</i>    |
| FBAPD88011    | <i>Eucera</i> | <i>Eucera dentata</i>     | <i>Tetraloniella dentata</i>    |
| GBACU116012   | <i>Eucera</i> | <i>Eucera dentata</i>     | <i>Tetraloniella dentata</i>    |
| GBACU116112   | <i>Eucera</i> | <i>Eucera dentata</i>     | <i>Tetraloniella dentata</i>    |
| GBACU142512   | <i>Eucera</i> | <i>Eucera dentata</i>     | <i>Tetraloniella dentata</i>    |
| GBACU209113   | <i>Eucera</i> | <i>Eucera dentata</i>     | <i>Tetraloniella dentata</i>    |
| GBACU209213   | <i>Eucera</i> | <i>Eucera dentata</i>     | <i>Tetraloniella dentata</i>    |
| GBACU209313   | <i>Eucera</i> | <i>Eucera dentata</i>     | <i>Tetraloniella dentata</i>    |
| POLLE09318    | <i>Eucera</i> | <i>Eucera dentata</i>     | <i>Tetraloniella dentata</i>    |
| BUSA06405     | <i>Eucera</i> | <i>Eucera eriocarpi</i>   | <i>Tetraloniella eriocarpi</i>  |
| SICOB68618    | <i>Eucera</i> | <i>Eucera eriocarpi</i>   | <i>Tetraloniella eriocarpi</i>  |
| GBMIN14281018 | <i>Eucera</i> | <i>Eucera graja</i>       |                                 |
| GBMIN14280718 | <i>Eucera</i> | <i>Eucera katangensis</i> |                                 |
| GBMIN14280818 | <i>Eucera</i> | <i>Eucera keiseri</i>     |                                 |
| GBMIN14280518 | <i>Eucera</i> | <i>Eucera minuta</i>      |                                 |
| ABBOL03015    | <i>Eucera</i> | <i>Eucera mitsukurii</i>  | <i>Tetraloniella mitsukurii</i> |
| FBAPB55809    | <i>Eucera</i> | <i>Eucera salicariae</i>  | <i>Tetraloniella salicariae</i> |

|              |                 |                              |                                 |
|--------------|-----------------|------------------------------|---------------------------------|
| FBAPB55909   | <i>Eucera</i>   | <i>Eucera salicariae</i>     | <i>Tetraloniella salicariae</i> |
| FBAPB56109   | <i>Eucera</i>   | <i>Eucera salicariae</i>     | <i>Tetraloniella salicariae</i> |
| FBAPC66511   | <i>Eucera</i>   | <i>Eucera salicariae</i>     | <i>Tetraloniella salicariae</i> |
| FBAPC74911   | <i>Eucera</i>   | <i>Eucera salicariae</i>     | <i>Tetraloniella salicariae</i> |
| FBAPD70411   | <i>Eucera</i>   | <i>Eucera salicariae</i>     | <i>Tetraloniella salicariae</i> |
| GBACU329113  | <i>Eucera</i>   | <i>Eucera salicariae</i>     | <i>Tetraloniella salicariae</i> |
| GBACU329213  | <i>Eucera</i>   | <i>Eucera salicariae</i>     | <i>Tetraloniella salicariae</i> |
| GBACU329313  | <i>Eucera</i>   | <i>Eucera salicariae</i>     | <i>Tetraloniella salicariae</i> |
| GBACU329413  | <i>Eucera</i>   | <i>Eucera salicariae</i>     | <i>Tetraloniella salicariae</i> |
| GBAH1810919  | <i>Thygater</i> | <i>Thygater anae</i>         |                                 |
| GBAH1811019  | <i>Thygater</i> | <i>Thygater anae</i>         |                                 |
| GBAH1811119  | <i>Thygater</i> | <i>Thygater anae</i>         |                                 |
| GBAH1811219  | <i>Thygater</i> | <i>Thygater analis</i>       |                                 |
| GBAH1811319  | <i>Thygater</i> | <i>Thygater analis</i>       |                                 |
| GBAH1811419  | <i>Thygater</i> | <i>Thygater analis</i>       |                                 |
| GBAH1811519  | <i>Thygater</i> | <i>Thygater analis</i>       |                                 |
| GBAH1811619  | <i>Thygater</i> | <i>Thygater analis</i>       |                                 |
| GBAH1811719  | <i>Thygater</i> | <i>Thygater analis</i>       |                                 |
| GBAH1811819  | <i>Thygater</i> | <i>Thygater analis</i>       |                                 |
| GBAH1811919  | <i>Thygater</i> | <i>Thygater analis</i>       |                                 |
| GBAH1812019  | <i>Thygater</i> | <i>Thygater analis</i>       |                                 |
| GBAH1812119  | <i>Thygater</i> | <i>Thygater analis</i>       |                                 |
| GBAH1812219  | <i>Thygater</i> | <i>Thygater analis</i>       |                                 |
| SICOB68818   | <i>Thygater</i> | <i>Thygater analis</i>       |                                 |
| GBAH1812319  | <i>Thygater</i> | <i>Thygater carijo</i>       |                                 |
| GBAH1812419  | <i>Thygater</i> | <i>Thygater carijo</i>       |                                 |
| GBAH1812519  | <i>Thygater</i> | <i>Thygater carijo</i>       |                                 |
| GBAH1812619  | <i>Thygater</i> | <i>Thygater carijo</i>       |                                 |
| GBAH1812719  | <i>Thygater</i> | <i>Thygater carijo</i>       |                                 |
| GBAH1812819  | <i>Thygater</i> | <i>Thygater carijo</i>       |                                 |
| GBAH1812919  | <i>Thygater</i> | <i>Thygater chaetaspis</i>   |                                 |
| GBAH1813019  | <i>Thygater</i> | <i>Thygater chaetaspis</i>   |                                 |
| GBAH1813119  | <i>Thygater</i> | <i>Thygater chaetaspis</i>   |                                 |
| GBAH1813219  | <i>Thygater</i> | <i>Thygater chaetaspis</i>   |                                 |
| GBAH1815319  | <i>Thygater</i> | <i>Thygater danunciae</i>    |                                 |
| GBAH1815619  | <i>Thygater</i> | <i>Thygater latitarsis</i>   |                                 |
| GBAH1815719  | <i>Thygater</i> | <i>Thygater latitarsis</i>   |                                 |
| GBAH1815819  | <i>Thygater</i> | <i>Thygater latitarsis</i>   |                                 |
| GBAH1815419  | <i>Thygater</i> | <i>Thygater luederwaldti</i> |                                 |
| GBAH1815519  | <i>Thygater</i> | <i>Thygater luederwaldti</i> |                                 |
| GBMNA2857919 | <i>Thygater</i> | <i>Thygater micheneri</i>    |                                 |
| GBAH1813319  | <i>Thygater</i> | <i>Thygater minarum</i>      |                                 |
| GBAH1813419  | <i>Thygater</i> | <i>Thygater minarum</i>      |                                 |
| GBAH1813519  | <i>Thygater</i> | <i>Thygater minarum</i>      |                                 |
| GBAH1813619  | <i>Thygater</i> | <i>Thygater minarum</i>      |                                 |
| GBMNA2972619 | <i>Thygater</i> | <i>Thygater mourei</i>       |                                 |

|              |                   |                                |
|--------------|-------------------|--------------------------------|
| GBAH1813719  | <i>Thygater</i>   | <i>Thygater palliventris</i>   |
| GBAH1813819  | <i>Thygater</i>   | <i>Thygater palliventris</i>   |
| GBAH1813919  | <i>Thygater</i>   | <i>Thygater palliventris</i>   |
| GBAH1814019  | <i>Thygater</i>   | <i>Thygater palliventris</i>   |
| GBAH1814119  | <i>Thygater</i>   | <i>Thygater palliventris</i>   |
| GBAH1814219  | <i>Thygater</i>   | <i>Thygater palliventris</i>   |
| GBAH1814319  | <i>Thygater</i>   | <i>Thygater palliventris</i>   |
| GBAH1814419  | <i>Thygater</i>   | <i>Thygater palliventris</i>   |
| GBAH1814519  | <i>Thygater</i>   | <i>Thygater palliventris</i>   |
| GBAH1814619  | <i>Thygater</i>   | <i>Thygater palliventris</i>   |
| GBAH1814719  | <i>Thygater</i>   | <i>Thygater palliventris</i>   |
| GBAH1814819  | <i>Thygater</i>   | <i>Thygater paranaensis</i>    |
| GBAH1814919  | <i>Thygater</i>   | <i>Thygater paranaensis</i>    |
| GBAH1815019  | <i>Thygater</i>   | <i>Thygater paranaensis</i>    |
| GBAH1815119  | <i>Thygater</i>   | <i>Thygater paranaensis</i>    |
| GBAH1815219  | <i>Thygater</i>   | <i>Thygater paranaensis</i>    |
| GBMNA2973019 | <i>Thygater</i>   | <i>Thygater seabrai</i>        |
| GBMNA2972519 | <i>Thygater</i>   | <i>Thygater sordidipennis</i>  |
| BOWGF11808   | <i>Thyreus</i>    | <i>Thyreus albomaculatus</i>   |
| BOWGF14608   | <i>Thyreus</i>    | <i>Thyreus albomaculatus</i>   |
| BOWGF13808   | <i>Thyreus</i>    | <i>Thyreus bouyssoui</i>       |
| LASNA34708   | <i>Thyreus</i>    | <i>Thyreus calceatus</i>       |
| FBAPB77609   | <i>Thyreus</i>    | <i>Thyreus histrionicus</i>    |
| FBAPB77709   | <i>Thyreus</i>    | <i>Thyreus histrionicus</i>    |
| GBLGC02012   | <i>Thyreus</i>    | <i>Thyreus histrionicus</i>    |
| GBLGC02112   | <i>Thyreus</i>    | <i>Thyreus histrionicus</i>    |
| ASBEE00208   | <i>Thyreus</i>    | <i>Thyreus nitidulus</i>       |
| ASBEE09608   | <i>Thyreus</i>    | <i>Thyreus nitidulus</i>       |
| HYQT20009    | <i>Thyreus</i>    | <i>Thyreus nitidulus</i>       |
| HYQT30609    | <i>Thyreus</i>    | <i>Thyreus nitidulus</i>       |
| HYQT61110    | <i>Thyreus</i>    | <i>Thyreus nitidulus</i>       |
| HYQT65210    | <i>Thyreus</i>    | <i>Thyreus nitidulus</i>       |
| VAQT38909    | <i>Thyreus</i>    | <i>Thyreus nitidulus</i>       |
| BOTV00611    | <i>Thyreus</i>    | <i>Thyreus novaehollandiae</i> |
| FBAPB77409   | <i>Thyreus</i>    | <i>Thyreus orbatus</i>         |
| FBAPB77509   | <i>Thyreus</i>    | <i>Thyreus orbatus</i>         |
| FBAPB85509   | <i>Thyreus</i>    | <i>Thyreus orbatus</i>         |
| FBAPD35911   | <i>Thyreus</i>    | <i>Thyreus orbatus</i>         |
| ABBOL01915   | <i>Thyreus</i>    | <i>Thyreus takaonis</i>        |
| BOFWM08508   | <i>Triepeolus</i> | <i>Triepeolus bilineatus</i>   |
| BOFWM08608   | <i>Triepeolus</i> | <i>Triepeolus bilineatus</i>   |
| BEECA71607   | <i>Triepeolus</i> | <i>Triepeolus brittaini</i>    |
| BEECA71707   | <i>Triepeolus</i> | <i>Triepeolus brittaini</i>    |
| BEECA71807   | <i>Triepeolus</i> | <i>Triepeolus brittaini</i>    |
| GBMNB6251820 | <i>Triepeolus</i> | <i>Triepeolus brittaini</i>    |
| HDBNS20704   | <i>Triepeolus</i> | <i>Triepeolus brittaini</i>    |

|              |                   |                                 |
|--------------|-------------------|---------------------------------|
| SDBEE12612   | <i>Triepeolus</i> | <i>Triepeolus californicus</i>  |
| BUSA06305    | <i>Triepeolus</i> | <i>Triepeolus concavus</i>      |
| DIAL30706    | <i>Triepeolus</i> | <i>Triepeolus donatus</i>       |
| BOFWM08208   | <i>Triepeolus</i> | <i>Triepeolus intrepidus</i>    |
| GMMCK112314  | <i>Triepeolus</i> | <i>Triepeolus mexicanus</i>     |
| WASPS88416   | <i>Triepeolus</i> | <i>Triepeolus pectoralis</i>    |
| SDBEE12812   | <i>Triepeolus</i> | <i>Triepeolus piscatoris</i>    |
| BEECC26308   | <i>Triepeolus</i> | <i>Triepeolus remigatus</i>     |
| GBMNB6185220 | <i>Triepeolus</i> | <i>Triepeolus robustus</i>      |
| NTCOL51017   | <i>Triepeolus</i> | <i>Triepeolus tristis</i>       |
| BBHYA220312  | <i>Triepeolus</i> | <i>Triepeolus utahensis</i>     |
| DRBEE00907   | <i>Trigona</i>    | <i>Trigona amalthea</i>         |
| DRBEE01007   | <i>Trigona</i>    | <i>Trigona amalthea</i>         |
| GBAH029006   | <i>Trigona</i>    | <i>Trigona amalthea</i>         |
| GBHAP54814   | <i>Trigona</i>    | <i>Trigona chanchamayoensis</i> |
| DRBEE00507   | <i>Trigona</i>    | <i>Trigona cilipes</i>          |
| ASINH83912   | <i>Trigona</i>    | <i>Trigona corvina</i>          |
| ASINH84112   | <i>Trigona</i>    | <i>Trigona corvina</i>          |
| ASINH84212   | <i>Trigona</i>    | <i>Trigona corvina</i>          |
| ASINH84312   | <i>Trigona</i>    | <i>Trigona corvina</i>          |
| ASINH84412   | <i>Trigona</i>    | <i>Trigona corvina</i>          |
| ASINH84612   | <i>Trigona</i>    | <i>Trigona corvina</i>          |
| ASINH84712   | <i>Trigona</i>    | <i>Trigona corvina</i>          |
| ASINH84912   | <i>Trigona</i>    | <i>Trigona ferricauda</i>       |
| ASINH85112   | <i>Trigona</i>    | <i>Trigona ferricauda</i>       |
| ASBZI23510   | <i>Trigona</i>    | <i>Trigona fulviventris</i>     |
| ASBZI23710   | <i>Trigona</i>    | <i>Trigona fulviventris</i>     |
| ASBZI42810   | <i>Trigona</i>    | <i>Trigona fulviventris</i>     |
| ASINH86412   | <i>Trigona</i>    | <i>Trigona fulviventris</i>     |
| ASINH89312   | <i>Trigona</i>    | <i>Trigona fulviventris</i>     |
| GMCAA101614  | <i>Trigona</i>    | <i>Trigona fulviventris</i>     |
| GMCKK13514   | <i>Trigona</i>    | <i>Trigona fulviventris</i>     |
| GMCRC160713  | <i>Trigona</i>    | <i>Trigona fulviventris</i>     |
| GMCRC15813   | <i>Trigona</i>    | <i>Trigona fulviventris</i>     |
| GMCRC304413  | <i>Trigona</i>    | <i>Trigona fulviventris</i>     |
| GMCRL135013  | <i>Trigona</i>    | <i>Trigona fulviventris</i>     |
| GMCRO67513   | <i>Trigona</i>    | <i>Trigona fulviventris</i>     |
| GMCRCQ05213  | <i>Trigona</i>    | <i>Trigona fulviventris</i>     |
| GMCRT71113   | <i>Trigona</i>    | <i>Trigona fulviventris</i>     |
| GMHGG24013   | <i>Trigona</i>    | <i>Trigona fulviventris</i>     |
| GMHGH39213   | <i>Trigona</i>    | <i>Trigona fulviventris</i>     |
| GMMAE05215   | <i>Trigona</i>    | <i>Trigona fulviventris</i>     |
| GMMAE19415   | <i>Trigona</i>    | <i>Trigona fulviventris</i>     |
| GMMAJ05115   | <i>Trigona</i>    | <i>Trigona fulviventris</i>     |
| GMMAK05015   | <i>Trigona</i>    | <i>Trigona fulviventris</i>     |
| JCCCA01916   | <i>Trigona</i>    | <i>Trigona fulviventris</i>     |

|            |                |                             |
|------------|----------------|-----------------------------|
| JCCCB44016 | <i>Trigona</i> | <i>Trigona fulviventris</i> |
| JCCCB44116 | <i>Trigona</i> | <i>Trigona fulviventris</i> |
| JCCCH14216 | <i>Trigona</i> | <i>Trigona fulviventris</i> |
| JCCCH14316 | <i>Trigona</i> | <i>Trigona fulviventris</i> |
| JCCCI25916 | <i>Trigona</i> | <i>Trigona fulviventris</i> |
| JCCCI26116 | <i>Trigona</i> | <i>Trigona fulviventris</i> |
| JCCCJ07916 | <i>Trigona</i> | <i>Trigona fulviventris</i> |
| JCCCK85316 | <i>Trigona</i> | <i>Trigona fulviventris</i> |
| JCCCL04916 | <i>Trigona</i> | <i>Trigona fulviventris</i> |
| JCCCN04816 | <i>Trigona</i> | <i>Trigona fulviventris</i> |
| JCCCT01616 | <i>Trigona</i> | <i>Trigona fulviventris</i> |
| JCCCV00416 | <i>Trigona</i> | <i>Trigona fulviventris</i> |
| JCCCV00516 | <i>Trigona</i> | <i>Trigona fulviventris</i> |
| JCCZ06916  | <i>Trigona</i> | <i>Trigona fulviventris</i> |
| JIBAB19216 | <i>Trigona</i> | <i>Trigona fulviventris</i> |
| JIBBG08716 | <i>Trigona</i> | <i>Trigona fulviventris</i> |
| JICCB27716 | <i>Trigona</i> | <i>Trigona fulviventris</i> |
| JICCL05816 | <i>Trigona</i> | <i>Trigona fulviventris</i> |
| JICCM84816 | <i>Trigona</i> | <i>Trigona fulviventris</i> |
| JICCN04616 | <i>Trigona</i> | <i>Trigona fulviventris</i> |
| JICCT71716 | <i>Trigona</i> | <i>Trigona fulviventris</i> |
| JICCU12016 | <i>Trigona</i> | <i>Trigona fulviventris</i> |
| JICZ20516  | <i>Trigona</i> | <i>Trigona fulviventris</i> |
| JICFZ15416 | <i>Trigona</i> | <i>Trigona fulviventris</i> |
| JIDDW01116 | <i>Trigona</i> | <i>Trigona fulviventris</i> |
| JIDDZ00916 | <i>Trigona</i> | <i>Trigona fulviventris</i> |
| JIEEG06416 | <i>Trigona</i> | <i>Trigona fulviventris</i> |
| JIEEX13016 | <i>Trigona</i> | <i>Trigona fulviventris</i> |
| JIEEZ00316 | <i>Trigona</i> | <i>Trigona fulviventris</i> |
| ASINH86812 | <i>Trigona</i> | <i>Trigona fuscipennis</i>  |
| ASINH86912 | <i>Trigona</i> | <i>Trigona fuscipennis</i>  |
| ASINH87112 | <i>Trigona</i> | <i>Trigona fuscipennis</i>  |
| ASINH87212 | <i>Trigona</i> | <i>Trigona fuscipennis</i>  |
| ASINH87312 | <i>Trigona</i> | <i>Trigona fuscipennis</i>  |
| ASINH87612 | <i>Trigona</i> | <i>Trigona fuscipennis</i>  |
| ASINH87712 | <i>Trigona</i> | <i>Trigona fuscipennis</i>  |
| ASINH88212 | <i>Trigona</i> | <i>Trigona muzoensis</i>    |
| ASINH90012 | <i>Trigona</i> | <i>Trigona nigerrima</i>    |
| ASINH90512 | <i>Trigona</i> | <i>Trigona silvestriana</i> |
| ASINH90712 | <i>Trigona</i> | <i>Trigona silvestriana</i> |
| ASINH90812 | <i>Trigona</i> | <i>Trigona silvestriana</i> |
| ASINH91112 | <i>Trigona</i> | <i>Trigona silvestriana</i> |
| ASINH91212 | <i>Trigona</i> | <i>Trigona silvestriana</i> |
| ASINH91312 | <i>Trigona</i> | <i>Trigona silvestriana</i> |
| ASINH91412 | <i>Trigona</i> | <i>Trigona silvestriana</i> |
| DRBEE00807 | <i>Trigona</i> | <i>Trigona silvestriana</i> |

|              |                   |                             |                           |
|--------------|-------------------|-----------------------------|---------------------------|
| GMABF03016   | <i>Trigona</i>    | <i>Trigona silvestriana</i> |                           |
| JCCCI24916   | <i>Trigona</i>    | <i>Trigona silvestriana</i> |                           |
| BOFTW00208   | <i>Trigona</i>    | <i>Trigona spinipes</i>     |                           |
| BOFTW06408   | <i>Trigona</i>    | <i>Trigona spinipes</i>     |                           |
| BOFTW10808   | <i>Trigona</i>    | <i>Trigona spinipes</i>     |                           |
| GBHAP54914   | <i>Trigona</i>    | <i>Trigona spinipes</i>     |                           |
| LASNA48308   | <i>Trigona</i>    | <i>Trigona spinipes</i>     |                           |
| LASNA57808   | <i>Trigona</i>    | <i>Trigona spinipes</i>     |                           |
| ASINH91712   | <i>Trigonisca</i> | <i>Trigonisca discolor</i>  |                           |
| GBHAP55014   | <i>Trigonisca</i> | <i>Trigonisca nataliae</i>  |                           |
| ASINH92412   | <i>Trigonisca</i> | <i>Trigonisca pipioli</i>   |                           |
| GBMNB6184920 | <i>Eucera</i>     | <i>Eucera angustior</i>     |                           |
| SICOB69118   | <i>Eucera</i>     | <i>Eucera fulva</i>         | <i>Xenoglossa fulva</i>   |
| SICOB69018   | <i>Eucera</i>     | <i>Eucera gabbii</i>        | <i>Xenoglossa gabbii</i>  |
| BOWGF20909   | <i>Eucera</i>     | <i>Eucera strenua</i>       | <i>Xenoglossa strenua</i> |
| BUSA32805    | <i>Eucera</i>     | <i>Eucera strenua</i>       | <i>Xenoglossa strenua</i> |
| BOFTW09008   | <i>Xylocopa</i>   | <i>Xylocopa aestuans</i>    |                           |
| GBAH453209   | <i>Xylocopa</i>   | <i>Xylocopa aestuans</i>    | <i>Xylocopa confusa</i>   |
| SABEE02415   | <i>Xylocopa</i>   | <i>Xylocopa aestuans</i>    |                           |
| SABEE02515   | <i>Xylocopa</i>   | <i>Xylocopa aestuans</i>    |                           |
| SABEE02715   | <i>Xylocopa</i>   | <i>Xylocopa aestuans</i>    |                           |
| SABEE02915   | <i>Xylocopa</i>   | <i>Xylocopa aestuans</i>    |                           |
| SABEE03315   | <i>Xylocopa</i>   | <i>Xylocopa aestuans</i>    |                           |
| SABEE03715   | <i>Xylocopa</i>   | <i>Xylocopa aestuans</i>    |                           |
| SABEE03915   | <i>Xylocopa</i>   | <i>Xylocopa aestuans</i>    |                           |
| SABEE04015   | <i>Xylocopa</i>   | <i>Xylocopa aestuans</i>    |                           |
| SABEE04115   | <i>Xylocopa</i>   | <i>Xylocopa aestuans</i>    |                           |
| SABEE04415   | <i>Xylocopa</i>   | <i>Xylocopa aestuans</i>    |                           |
| SABEE07015   | <i>Xylocopa</i>   | <i>Xylocopa aestuans</i>    |                           |
| SABEE08915   | <i>Xylocopa</i>   | <i>Xylocopa aestuans</i>    |                           |
| SABEE09115   | <i>Xylocopa</i>   | <i>Xylocopa aestuans</i>    |                           |
| SABEE09315   | <i>Xylocopa</i>   | <i>Xylocopa aestuans</i>    |                           |
| GBAH453309   | <i>Xylocopa</i>   | <i>Xylocopa albinotum</i>   |                           |
| GBAH453409   | <i>Xylocopa</i>   | <i>Xylocopa albinotum</i>   |                           |
| GBAH453509   | <i>Xylocopa</i>   | <i>Xylocopa albinotum</i>   |                           |
| GBAH453609   | <i>Xylocopa</i>   | <i>Xylocopa albinotum</i>   |                           |
| GBAH453709   | <i>Xylocopa</i>   | <i>Xylocopa albinotum</i>   |                           |
| GBAH453809   | <i>Xylocopa</i>   | <i>Xylocopa albinotum</i>   |                           |
| GBAH453909   | <i>Xylocopa</i>   | <i>Xylocopa albinotum</i>   |                           |
| GBAH454009   | <i>Xylocopa</i>   | <i>Xylocopa albinotum</i>   |                           |
| GBAH454109   | <i>Xylocopa</i>   | <i>Xylocopa albinotum</i>   |                           |
| GBAH454209   | <i>Xylocopa</i>   | <i>Xylocopa albinotum</i>   |                           |
| GBAH454309   | <i>Xylocopa</i>   | <i>Xylocopa albinotum</i>   |                           |
| GBAH454409   | <i>Xylocopa</i>   | <i>Xylocopa albinotum</i>   |                           |
| GBAH455109   | <i>Xylocopa</i>   | <i>Xylocopa amamensis</i>   |                           |
| GBAH455209   | <i>Xylocopa</i>   | <i>Xylocopa amamensis</i>   |                           |

|              |                 |                               |
|--------------|-----------------|-------------------------------|
| GBAH455309   | <i>Xylocopa</i> | <i>Xylocopa amamensis</i>     |
| GBAH455409   | <i>Xylocopa</i> | <i>Xylocopa amamensis</i>     |
| GBAH455509   | <i>Xylocopa</i> | <i>Xylocopa amamensis</i>     |
| GBAH455609   | <i>Xylocopa</i> | <i>Xylocopa amamensis</i>     |
| GBAH455709   | <i>Xylocopa</i> | <i>Xylocopa amamensis</i>     |
| GBAH455809   | <i>Xylocopa</i> | <i>Xylocopa amamensis</i>     |
| GBAH455909   | <i>Xylocopa</i> | <i>Xylocopa amamensis</i>     |
| GBAH456009   | <i>Xylocopa</i> | <i>Xylocopa amamensis</i>     |
| GBAH456109   | <i>Xylocopa</i> | <i>Xylocopa amamensis</i>     |
| CDBLM01219   | <i>Xylocopa</i> | <i>Xylocopa appendiculata</i> |
| GBAH1264515  | <i>Xylocopa</i> | <i>Xylocopa appendiculata</i> |
| GBAH1264615  | <i>Xylocopa</i> | <i>Xylocopa appendiculata</i> |
| GBAH1264715  | <i>Xylocopa</i> | <i>Xylocopa appendiculata</i> |
| GBAH1264815  | <i>Xylocopa</i> | <i>Xylocopa appendiculata</i> |
| GBAH1264915  | <i>Xylocopa</i> | <i>Xylocopa appendiculata</i> |
| GBAH1265015  | <i>Xylocopa</i> | <i>Xylocopa appendiculata</i> |
| GBAH1265115  | <i>Xylocopa</i> | <i>Xylocopa appendiculata</i> |
| GBAH1265215  | <i>Xylocopa</i> | <i>Xylocopa appendiculata</i> |
| GBAH1265315  | <i>Xylocopa</i> | <i>Xylocopa appendiculata</i> |
| GBAH1265415  | <i>Xylocopa</i> | <i>Xylocopa appendiculata</i> |
| GBAH1741019  | <i>Xylocopa</i> | <i>Xylocopa appendiculata</i> |
| GBAH456209   | <i>Xylocopa</i> | <i>Xylocopa appendiculata</i> |
| GBAH456309   | <i>Xylocopa</i> | <i>Xylocopa appendiculata</i> |
| GBAH456409   | <i>Xylocopa</i> | <i>Xylocopa appendiculata</i> |
| GBAH456509   | <i>Xylocopa</i> | <i>Xylocopa appendiculata</i> |
| GBAH456609   | <i>Xylocopa</i> | <i>Xylocopa appendiculata</i> |
| GBAH456709   | <i>Xylocopa</i> | <i>Xylocopa appendiculata</i> |
| GBAH456809   | <i>Xylocopa</i> | <i>Xylocopa appendiculata</i> |
| GBAH456909   | <i>Xylocopa</i> | <i>Xylocopa appendiculata</i> |
| GBMIN1796413 | <i>Xylocopa</i> | <i>Xylocopa appendiculata</i> |
| GBMNA3320819 | <i>Xylocopa</i> | <i>Xylocopa appendiculata</i> |
| MAIMB10709   | <i>Xylocopa</i> | <i>Xylocopa basalis</i>       |
| MAPOL01310   | <i>Xylocopa</i> | <i>Xylocopa basalis</i>       |
| MAPOL07210   | <i>Xylocopa</i> | <i>Xylocopa basalis</i>       |
| HYAS123112   | <i>Xylocopa</i> | <i>Xylocopa caffra</i>        |
| LASNA43708   | <i>Xylocopa</i> | <i>Xylocopa caffra</i>        |
| SAFRA534818  | <i>Xylocopa</i> | <i>Xylocopa caffra</i>        |
| BBHYA02112   | <i>Xylocopa</i> | <i>Xylocopa californica</i>   |
| BBHYA02212   | <i>Xylocopa</i> | <i>Xylocopa californica</i>   |
| BBHYA02312   | <i>Xylocopa</i> | <i>Xylocopa californica</i>   |
| BBHYA02412   | <i>Xylocopa</i> | <i>Xylocopa californica</i>   |
| BBHYA02512   | <i>Xylocopa</i> | <i>Xylocopa californica</i>   |
| BBHYA02812   | <i>Xylocopa</i> | <i>Xylocopa californica</i>   |
| BBHYA03212   | <i>Xylocopa</i> | <i>Xylocopa californica</i>   |
| BEECA04906   | <i>Xylocopa</i> | <i>Xylocopa californica</i>   |
| UAENT00519   | <i>Xylocopa</i> | <i>Xylocopa californica</i>   |

|              |                 |                             |                          |
|--------------|-----------------|-----------------------------|--------------------------|
| BAHAR03114   | <i>Xylocopa</i> | <i>Xylocopa cubaecola</i>   |                          |
| BEECB08607   | <i>Xylocopa</i> | <i>Xylocopa cubaecola</i>   |                          |
| GBAH028806   | <i>Xylocopa</i> | <i>Xylocopa dejeanii</i>    | <i>Xylocopa collaris</i> |
| LASNA54308   | <i>Xylocopa</i> | <i>Xylocopa erythrina</i>   |                          |
| LASNA63808   | <i>Xylocopa</i> | <i>Xylocopa erythrina</i>   |                          |
| GBMNB6321220 | <i>Xylocopa</i> | <i>Xylocopa fenestrata</i>  |                          |
| POPIN00719   | <i>Xylocopa</i> | <i>Xylocopa fenestrata</i>  |                          |
| BOFWM21308   | <i>Xylocopa</i> | <i>Xylocopa fimbriata</i>   |                          |
| BOWGF03108   | <i>Xylocopa</i> | <i>Xylocopa flavicollis</i> |                          |
| GBAH454509   | <i>Xylocopa</i> | <i>Xylocopa flavifrons</i>  |                          |
| GBAH454609   | <i>Xylocopa</i> | <i>Xylocopa flavifrons</i>  |                          |
| GBAH454709   | <i>Xylocopa</i> | <i>Xylocopa flavifrons</i>  |                          |
| GBAH454809   | <i>Xylocopa</i> | <i>Xylocopa flavifrons</i>  |                          |
| GBAH454909   | <i>Xylocopa</i> | <i>Xylocopa flavifrons</i>  |                          |
| GBAH455009   | <i>Xylocopa</i> | <i>Xylocopa flavifrons</i>  |                          |
| GBHAP75014   | <i>Xylocopa</i> | <i>Xylocopa flavifrons</i>  |                          |
| BOWGF03308   | <i>Xylocopa</i> | <i>Xylocopa flavorufa</i>   |                          |
| BOWGF09608   | <i>Xylocopa</i> | <i>Xylocopa flavorufa</i>   |                          |
| GBAH1765419  | <i>Xylocopa</i> | <i>Xylocopa frontalis</i>   |                          |
| GBAH1765519  | <i>Xylocopa</i> | <i>Xylocopa frontalis</i>   |                          |
| GBAH1765619  | <i>Xylocopa</i> | <i>Xylocopa frontalis</i>   |                          |
| GBAH1765719  | <i>Xylocopa</i> | <i>Xylocopa frontalis</i>   |                          |
| GBAH1765819  | <i>Xylocopa</i> | <i>Xylocopa frontalis</i>   |                          |
| GBAH1765919  | <i>Xylocopa</i> | <i>Xylocopa frontalis</i>   |                          |
| GBAH1766019  | <i>Xylocopa</i> | <i>Xylocopa frontalis</i>   |                          |
| GBAH1766119  | <i>Xylocopa</i> | <i>Xylocopa frontalis</i>   |                          |
| GBHAP55114   | <i>Xylocopa</i> | <i>Xylocopa frontalis</i>   |                          |
| GBMIN7356217 | <i>Xylocopa</i> | <i>Xylocopa frontalis</i>   |                          |
| GBMIN7356317 | <i>Xylocopa</i> | <i>Xylocopa frontalis</i>   |                          |
| GBMIN7356417 | <i>Xylocopa</i> | <i>Xylocopa frontalis</i>   |                          |
| GBMIN7356517 | <i>Xylocopa</i> | <i>Xylocopa frontalis</i>   |                          |
| GBMIN7356617 | <i>Xylocopa</i> | <i>Xylocopa frontalis</i>   |                          |
| GBMIN7356717 | <i>Xylocopa</i> | <i>Xylocopa frontalis</i>   |                          |
| GBMIN7356817 | <i>Xylocopa</i> | <i>Xylocopa frontalis</i>   |                          |
| GBMIN7356917 | <i>Xylocopa</i> | <i>Xylocopa frontalis</i>   |                          |
| GBMIN7357017 | <i>Xylocopa</i> | <i>Xylocopa frontalis</i>   |                          |
| GBMIN7357117 | <i>Xylocopa</i> | <i>Xylocopa frontalis</i>   |                          |
| GBMIN7357217 | <i>Xylocopa</i> | <i>Xylocopa frontalis</i>   |                          |
| GBMIN7357317 | <i>Xylocopa</i> | <i>Xylocopa frontalis</i>   |                          |
| GBMIN7357417 | <i>Xylocopa</i> | <i>Xylocopa frontalis</i>   |                          |
| GBMIN7357517 | <i>Xylocopa</i> | <i>Xylocopa frontalis</i>   |                          |
| GBMIN7357617 | <i>Xylocopa</i> | <i>Xylocopa frontalis</i>   |                          |
| GBMIN7357717 | <i>Xylocopa</i> | <i>Xylocopa frontalis</i>   |                          |
| GBMIN7357817 | <i>Xylocopa</i> | <i>Xylocopa frontalis</i>   |                          |
| GBMIN7357917 | <i>Xylocopa</i> | <i>Xylocopa frontalis</i>   |                          |
| GBMIN7358017 | <i>Xylocopa</i> | <i>Xylocopa frontalis</i>   |                          |



|              |                 |                             |
|--------------|-----------------|-----------------------------|
| GBMIN7358117 | <i>Xylocopa</i> | <i>Xylocopa frontalis</i>   |
| GBMIN7358217 | <i>Xylocopa</i> | <i>Xylocopa frontalis</i>   |
| GBMIN7358317 | <i>Xylocopa</i> | <i>Xylocopa frontalis</i>   |
| GBMIN7358417 | <i>Xylocopa</i> | <i>Xylocopa frontalis</i>   |
| GBMIN7358517 | <i>Xylocopa</i> | <i>Xylocopa frontalis</i>   |
| GBMIN7358617 | <i>Xylocopa</i> | <i>Xylocopa frontalis</i>   |
| GBMIN7358717 | <i>Xylocopa</i> | <i>Xylocopa frontalis</i>   |
| GBMIN7358817 | <i>Xylocopa</i> | <i>Xylocopa frontalis</i>   |
| GBMIN7358917 | <i>Xylocopa</i> | <i>Xylocopa frontalis</i>   |
| GBMIN7359017 | <i>Xylocopa</i> | <i>Xylocopa frontalis</i>   |
| GBMIN7359117 | <i>Xylocopa</i> | <i>Xylocopa frontalis</i>   |
| GBMIN7359217 | <i>Xylocopa</i> | <i>Xylocopa frontalis</i>   |
| GBMIN7359317 | <i>Xylocopa</i> | <i>Xylocopa frontalis</i>   |
| GBMIN7359417 | <i>Xylocopa</i> | <i>Xylocopa frontalis</i>   |
| GBMIN7359517 | <i>Xylocopa</i> | <i>Xylocopa frontalis</i>   |
| GBMIN7359617 | <i>Xylocopa</i> | <i>Xylocopa frontalis</i>   |
| GBMIN7359717 | <i>Xylocopa</i> | <i>Xylocopa frontalis</i>   |
| GBMIN7359817 | <i>Xylocopa</i> | <i>Xylocopa frontalis</i>   |
| GBMIN7359917 | <i>Xylocopa</i> | <i>Xylocopa frontalis</i>   |
| GBMIN7360017 | <i>Xylocopa</i> | <i>Xylocopa frontalis</i>   |
| GBMIN7360117 | <i>Xylocopa</i> | <i>Xylocopa frontalis</i>   |
| GBMIN7360217 | <i>Xylocopa</i> | <i>Xylocopa frontalis</i>   |
| GBMIN7360317 | <i>Xylocopa</i> | <i>Xylocopa frontalis</i>   |
| GBMIN7360417 | <i>Xylocopa</i> | <i>Xylocopa frontalis</i>   |
| GBMIN7360517 | <i>Xylocopa</i> | <i>Xylocopa frontalis</i>   |
| GBMIN7360617 | <i>Xylocopa</i> | <i>Xylocopa frontalis</i>   |
| GBMIN7360717 | <i>Xylocopa</i> | <i>Xylocopa frontalis</i>   |
| GBMIN777712  | <i>Xylocopa</i> | <i>Xylocopa griseascens</i> |
| BOWGF09708   | <i>Xylocopa</i> | <i>Xylocopa inconstans</i>  |
| MAHYM00610   | <i>Xylocopa</i> | <i>Xylocopa iridipennis</i> |
| MAHYM00710   | <i>Xylocopa</i> | <i>Xylocopa iridipennis</i> |
| MAHYM00810   | <i>Xylocopa</i> | <i>Xylocopa iridipennis</i> |
| MAHYM00910   | <i>Xylocopa</i> | <i>Xylocopa iridipennis</i> |
| MAHYM01010   | <i>Xylocopa</i> | <i>Xylocopa iridipennis</i> |
| MAHYM01110   | <i>Xylocopa</i> | <i>Xylocopa iridipennis</i> |
| MAHYM57311   | <i>Xylocopa</i> | <i>Xylocopa iridipennis</i> |
| MAHYM57411   | <i>Xylocopa</i> | <i>Xylocopa iridipennis</i> |
| MAHYM85912   | <i>Xylocopa</i> | <i>Xylocopa iridipennis</i> |
| MAIMB10409   | <i>Xylocopa</i> | <i>Xylocopa iridipennis</i> |
| MAIMB10509   | <i>Xylocopa</i> | <i>Xylocopa iridipennis</i> |
| MAIMB10609   | <i>Xylocopa</i> | <i>Xylocopa iridipennis</i> |
| MAPOL01410   | <i>Xylocopa</i> | <i>Xylocopa iridipennis</i> |
| FBAPB38409   | <i>Xylocopa</i> | <i>Xylocopa iris</i>        |
| FBAPB38509   | <i>Xylocopa</i> | <i>Xylocopa iris</i>        |
| FBAPB38609   | <i>Xylocopa</i> | <i>Xylocopa iris</i>        |
| FBAPD94711   | <i>Xylocopa</i> | <i>Xylocopa iris</i>        |

|              |                 |                             |
|--------------|-----------------|-----------------------------|
| GBLGC00412   | <i>Xylocopa</i> | <i>Xylocopa iris</i>        |
| BOFTW11808   | <i>Xylocopa</i> | <i>Xylocopa macrops</i>     |
| BOFWM07908   | <i>Xylocopa</i> | <i>Xylocopa mexicanorum</i> |
| BBHYA02912   | <i>Xylocopa</i> | <i>Xylocopa micans</i>      |
| BBHYA03012   | <i>Xylocopa</i> | <i>Xylocopa micans</i>      |
| BBHYA03112   | <i>Xylocopa</i> | <i>Xylocopa micans</i>      |
| BBHYA03312   | <i>Xylocopa</i> | <i>Xylocopa micans</i>      |
| BBHYA08612   | <i>Xylocopa</i> | <i>Xylocopa micans</i>      |
| BBHYG65610   | <i>Xylocopa</i> | <i>Xylocopa micans</i>      |
| BBHYG65710   | <i>Xylocopa</i> | <i>Xylocopa micans</i>      |
| BBHYG65810   | <i>Xylocopa</i> | <i>Xylocopa micans</i>      |
| BBHYG66110   | <i>Xylocopa</i> | <i>Xylocopa micans</i>      |
| BBHYG66210   | <i>Xylocopa</i> | <i>Xylocopa micans</i>      |
| BBHYG66310   | <i>Xylocopa</i> | <i>Xylocopa micans</i>      |
| BBHYG66810   | <i>Xylocopa</i> | <i>Xylocopa micans</i>      |
| BBHYG67010   | <i>Xylocopa</i> | <i>Xylocopa micans</i>      |
| BBHYG67110   | <i>Xylocopa</i> | <i>Xylocopa micans</i>      |
| BBHYG67210   | <i>Xylocopa</i> | <i>Xylocopa micans</i>      |
| BEECC22708   | <i>Xylocopa</i> | <i>Xylocopa micans</i>      |
| GBAH1676419  | <i>Xylocopa</i> | <i>Xylocopa micans</i>      |
| GBAH1676519  | <i>Xylocopa</i> | <i>Xylocopa micans</i>      |
| GBMIN7360817 | <i>Xylocopa</i> | <i>Xylocopa micans</i>      |
| GBMIN7360917 | <i>Xylocopa</i> | <i>Xylocopa micans</i>      |
| GBMIN7361017 | <i>Xylocopa</i> | <i>Xylocopa micans</i>      |
| GBMIN7361117 | <i>Xylocopa</i> | <i>Xylocopa micans</i>      |
| GBMIN7361217 | <i>Xylocopa</i> | <i>Xylocopa micans</i>      |
| GBMIN7361317 | <i>Xylocopa</i> | <i>Xylocopa micans</i>      |
| GBMIN7361417 | <i>Xylocopa</i> | <i>Xylocopa micans</i>      |
| GBMIN7361517 | <i>Xylocopa</i> | <i>Xylocopa micans</i>      |
| GBMIN7361617 | <i>Xylocopa</i> | <i>Xylocopa micans</i>      |
| GBMIN7361717 | <i>Xylocopa</i> | <i>Xylocopa micans</i>      |
| GBMIN7361817 | <i>Xylocopa</i> | <i>Xylocopa micans</i>      |
| GBMIN7361917 | <i>Xylocopa</i> | <i>Xylocopa micans</i>      |
| GBMIN7362017 | <i>Xylocopa</i> | <i>Xylocopa micans</i>      |
| GBMIN7362117 | <i>Xylocopa</i> | <i>Xylocopa micans</i>      |
| GBMIN7362217 | <i>Xylocopa</i> | <i>Xylocopa micans</i>      |
| GBMIN7362317 | <i>Xylocopa</i> | <i>Xylocopa micans</i>      |
| GBMIN7362417 | <i>Xylocopa</i> | <i>Xylocopa micans</i>      |
| GBMIN7362517 | <i>Xylocopa</i> | <i>Xylocopa micans</i>      |
| GBMIN7362617 | <i>Xylocopa</i> | <i>Xylocopa micans</i>      |
| GBMIN7362717 | <i>Xylocopa</i> | <i>Xylocopa micans</i>      |
| GBMIN7362817 | <i>Xylocopa</i> | <i>Xylocopa micans</i>      |
| GBMIN7362917 | <i>Xylocopa</i> | <i>Xylocopa micans</i>      |
| GBMIN7363017 | <i>Xylocopa</i> | <i>Xylocopa micans</i>      |
| GBMIN7363117 | <i>Xylocopa</i> | <i>Xylocopa micans</i>      |
| GBMIN7363217 | <i>Xylocopa</i> | <i>Xylocopa micans</i>      |

|              |                 |                                |
|--------------|-----------------|--------------------------------|
| GBMIN7363317 | <i>Xylocopa</i> | <i>Xylocopa micans</i>         |
| GBMIN7363417 | <i>Xylocopa</i> | <i>Xylocopa micans</i>         |
| GBMIN7363517 | <i>Xylocopa</i> | <i>Xylocopa micans</i>         |
| GBMIN7363617 | <i>Xylocopa</i> | <i>Xylocopa micans</i>         |
| GBMIN7363717 | <i>Xylocopa</i> | <i>Xylocopa micans</i>         |
| GBMIN7363817 | <i>Xylocopa</i> | <i>Xylocopa micans</i>         |
| GBMIN7363917 | <i>Xylocopa</i> | <i>Xylocopa micans</i>         |
| GBMIN7364017 | <i>Xylocopa</i> | <i>Xylocopa micans</i>         |
| LASNA67308   | <i>Xylocopa</i> | <i>Xylocopa mirabilis</i>      |
| LASNA76708   | <i>Xylocopa</i> | <i>Xylocopa mirabilis</i>      |
| BEECA77807   | <i>Xylocopa</i> | <i>Xylocopa mordax</i>         |
| BEECA77907   | <i>Xylocopa</i> | <i>Xylocopa mordax</i>         |
| BEECA78007   | <i>Xylocopa</i> | <i>Xylocopa mordax</i>         |
| BEECB18007   | <i>Xylocopa</i> | <i>Xylocopa mordax</i>         |
| BEECB19807   | <i>Xylocopa</i> | <i>Xylocopa mordax</i>         |
| BOFWM21508   | <i>Xylocopa</i> | <i>Xylocopa muscaria</i>       |
| GBAH1644819  | <i>Xylocopa</i> | <i>Xylocopa nasalis</i>        |
| BOWGF03408   | <i>Xylocopa</i> | <i>Xylocopa nigrita</i>        |
| BOFTW00108   | <i>Xylocopa</i> | <i>Xylocopa nogueirai</i>      |
| BOFTW12108   | <i>Xylocopa</i> | <i>Xylocopa nogueirai</i>      |
| BOWGF09808   | <i>Xylocopa</i> | <i>Xylocopa somalica</i>       |
| GBMIN7364117 | <i>Xylocopa</i> | <i>Xylocopa sonorina</i>       |
| GMAFK04315   | <i>Xylocopa</i> | <i>Xylocopa splendidula</i>    |
| GBMIN7364517 | <i>Xylocopa</i> | <i>Xylocopa tranquebarica</i>  |
| GBAH1776419  | <i>Xylocopa</i> | <i>Xylocopa tranquebarorum</i> |
| FBAPB38109   | <i>Xylocopa</i> | <i>Xylocopa valga</i>          |
| FBAPB38209   | <i>Xylocopa</i> | <i>Xylocopa valga</i>          |
| GBAH1857319  | <i>Xylocopa</i> | <i>Xylocopa valga</i>          |
| BBHYA01712   | <i>Xylocopa</i> | <i>Xylocopa varipuncta</i>     |
| BBHYA02712   | <i>Xylocopa</i> | <i>Xylocopa varipuncta</i>     |
| SDBEE13212   | <i>Xylocopa</i> | <i>Xylocopa varipuncta</i>     |
| SDBEE13312   | <i>Xylocopa</i> | <i>Xylocopa varipuncta</i>     |
| FBAPB37909   | <i>Xylocopa</i> | <i>Xylocopa violacea</i>       |
| FBAPC52011   | <i>Xylocopa</i> | <i>Xylocopa violacea</i>       |
| GBAH1614319  | <i>Xylocopa</i> | <i>Xylocopa violacea</i>       |
| GBAH1857419  | <i>Xylocopa</i> | <i>Xylocopa violacea</i>       |
| GBLGC00112   | <i>Xylocopa</i> | <i>Xylocopa violacea</i>       |
| GBLGC00212   | <i>Xylocopa</i> | <i>Xylocopa violacea</i>       |
| GBLGC00312   | <i>Xylocopa</i> | <i>Xylocopa violacea</i>       |
| GBLGC07012   | <i>Xylocopa</i> | <i>Xylocopa violacea</i>       |
| GBLGC08912   | <i>Xylocopa</i> | <i>Xylocopa violacea</i>       |
| GBMNB6249920 | <i>Xylocopa</i> | <i>Xylocopa violacea</i>       |
| POLLE131519  | <i>Xylocopa</i> | <i>Xylocopa violacea</i>       |
| POLLE184519  | <i>Xylocopa</i> | <i>Xylocopa violacea</i>       |
| BBHYA02612   | <i>Xylocopa</i> | <i>Xylocopa virginica</i>      |
| BBHYA05012   | <i>Xylocopa</i> | <i>Xylocopa virginica</i>      |

|              |                 |                           |
|--------------|-----------------|---------------------------|
| BBHYA05112   | <i>Xylocopa</i> | <i>Xylocopa virginica</i> |
| BBHYA05212   | <i>Xylocopa</i> | <i>Xylocopa virginica</i> |
| BBHYA05312   | <i>Xylocopa</i> | <i>Xylocopa virginica</i> |
| BBHYA05412   | <i>Xylocopa</i> | <i>Xylocopa virginica</i> |
| BBHYA05512   | <i>Xylocopa</i> | <i>Xylocopa virginica</i> |
| BBHYA05612   | <i>Xylocopa</i> | <i>Xylocopa virginica</i> |
| BBHYA05712   | <i>Xylocopa</i> | <i>Xylocopa virginica</i> |
| BBHYG64810   | <i>Xylocopa</i> | <i>Xylocopa virginica</i> |
| BBHYG65010   | <i>Xylocopa</i> | <i>Xylocopa virginica</i> |
| BBHYG65110   | <i>Xylocopa</i> | <i>Xylocopa virginica</i> |
| BBHYG65210   | <i>Xylocopa</i> | <i>Xylocopa virginica</i> |
| BBHYG65910   | <i>Xylocopa</i> | <i>Xylocopa virginica</i> |
| BBHYN16510   | <i>Xylocopa</i> | <i>Xylocopa virginica</i> |
| BBHYN17110   | <i>Xylocopa</i> | <i>Xylocopa virginica</i> |
| BEECA04606   | <i>Xylocopa</i> | <i>Xylocopa virginica</i> |
| BEECA38106   | <i>Xylocopa</i> | <i>Xylocopa virginica</i> |
| BEEMH03206   | <i>Xylocopa</i> | <i>Xylocopa virginica</i> |
| BEEMH28806   | <i>Xylocopa</i> | <i>Xylocopa virginica</i> |
| BUSA10405    | <i>Xylocopa</i> | <i>Xylocopa virginica</i> |
| BUSA15105    | <i>Xylocopa</i> | <i>Xylocopa virginica</i> |
| BUSA15205    | <i>Xylocopa</i> | <i>Xylocopa virginica</i> |
| BUSA15305    | <i>Xylocopa</i> | <i>Xylocopa virginica</i> |
| CNPPA402812  | <i>Xylocopa</i> | <i>Xylocopa virginica</i> |
| CNPPA402912  | <i>Xylocopa</i> | <i>Xylocopa virginica</i> |
| CNPPB217612  | <i>Xylocopa</i> | <i>Xylocopa virginica</i> |
| CNPPD191112  | <i>Xylocopa</i> | <i>Xylocopa virginica</i> |
| CRHIE105316  | <i>Xylocopa</i> | <i>Xylocopa virginica</i> |
| DIAL08306    | <i>Xylocopa</i> | <i>Xylocopa virginica</i> |
| DIAL09506    | <i>Xylocopa</i> | <i>Xylocopa virginica</i> |
| ERPIR22212   | <i>Xylocopa</i> | <i>Xylocopa virginica</i> |
| GBAH1669219  | <i>Xylocopa</i> | <i>Xylocopa virginica</i> |
| GBAH699510   | <i>Xylocopa</i> | <i>Xylocopa virginica</i> |
| GBMIN7364617 | <i>Xylocopa</i> | <i>Xylocopa virginica</i> |
| GBMIN7364717 | <i>Xylocopa</i> | <i>Xylocopa virginica</i> |
| GBMIN7364817 | <i>Xylocopa</i> | <i>Xylocopa virginica</i> |
| GBMIN7364917 | <i>Xylocopa</i> | <i>Xylocopa virginica</i> |
| GBMIN7365017 | <i>Xylocopa</i> | <i>Xylocopa virginica</i> |
| GBMIN7365117 | <i>Xylocopa</i> | <i>Xylocopa virginica</i> |
| GBMIN7365217 | <i>Xylocopa</i> | <i>Xylocopa virginica</i> |
| GBMIN7365317 | <i>Xylocopa</i> | <i>Xylocopa virginica</i> |
| GBMIN7365417 | <i>Xylocopa</i> | <i>Xylocopa virginica</i> |
| GBMIN7365517 | <i>Xylocopa</i> | <i>Xylocopa virginica</i> |
| GBMIN7365617 | <i>Xylocopa</i> | <i>Xylocopa virginica</i> |
| GBMIN7365717 | <i>Xylocopa</i> | <i>Xylocopa virginica</i> |
| GBMIN7365817 | <i>Xylocopa</i> | <i>Xylocopa virginica</i> |
| GBMIN7365917 | <i>Xylocopa</i> | <i>Xylocopa virginica</i> |

|              |                 |                           |
|--------------|-----------------|---------------------------|
| GBMIN7366017 | <i>Xylocopa</i> | <i>Xylocopa virginica</i> |
| GBMIN7366117 | <i>Xylocopa</i> | <i>Xylocopa virginica</i> |
| GBMIN7366217 | <i>Xylocopa</i> | <i>Xylocopa virginica</i> |
| GBMIN7366317 | <i>Xylocopa</i> | <i>Xylocopa virginica</i> |
| GBMIN7366417 | <i>Xylocopa</i> | <i>Xylocopa virginica</i> |
| GBMIN7366517 | <i>Xylocopa</i> | <i>Xylocopa virginica</i> |
| GBMIN7366617 | <i>Xylocopa</i> | <i>Xylocopa virginica</i> |
| GBMIN7366717 | <i>Xylocopa</i> | <i>Xylocopa virginica</i> |
| GBMIN7366817 | <i>Xylocopa</i> | <i>Xylocopa virginica</i> |
| GBMIN7366917 | <i>Xylocopa</i> | <i>Xylocopa virginica</i> |
| GBMIN7367017 | <i>Xylocopa</i> | <i>Xylocopa virginica</i> |
| GBMIN7367117 | <i>Xylocopa</i> | <i>Xylocopa virginica</i> |
| GBMIN7367217 | <i>Xylocopa</i> | <i>Xylocopa virginica</i> |
| GBMIN7367317 | <i>Xylocopa</i> | <i>Xylocopa virginica</i> |
| GBMIN7367417 | <i>Xylocopa</i> | <i>Xylocopa virginica</i> |
| GBMIN7367517 | <i>Xylocopa</i> | <i>Xylocopa virginica</i> |
| GBMIN7367617 | <i>Xylocopa</i> | <i>Xylocopa virginica</i> |
| GBMIN7367717 | <i>Xylocopa</i> | <i>Xylocopa virginica</i> |
| GBMIN7367817 | <i>Xylocopa</i> | <i>Xylocopa virginica</i> |
| GBMIN7367917 | <i>Xylocopa</i> | <i>Xylocopa virginica</i> |
| GBMIN7368017 | <i>Xylocopa</i> | <i>Xylocopa virginica</i> |
| GBMIN7368117 | <i>Xylocopa</i> | <i>Xylocopa virginica</i> |
| GBMIN7368217 | <i>Xylocopa</i> | <i>Xylocopa virginica</i> |
| HYMBB01009   | <i>Xylocopa</i> | <i>Xylocopa virginica</i> |
| HYMBB01109   | <i>Xylocopa</i> | <i>Xylocopa virginica</i> |
| HYMBB01309   | <i>Xylocopa</i> | <i>Xylocopa virginica</i> |
| HYMBB01609   | <i>Xylocopa</i> | <i>Xylocopa virginica</i> |
| HYMBC00610   | <i>Xylocopa</i> | <i>Xylocopa virginica</i> |
| HYMBC00710   | <i>Xylocopa</i> | <i>Xylocopa virginica</i> |
| OPPFM00117   | <i>Xylocopa</i> | <i>Xylocopa virginica</i> |
| OPPFM00217   | <i>Xylocopa</i> | <i>Xylocopa virginica</i> |
| OPPFM00317   | <i>Xylocopa</i> | <i>Xylocopa virginica</i> |
| OPPFQ429117  | <i>Xylocopa</i> | <i>Xylocopa virginica</i> |
| OPPFS12617   | <i>Xylocopa</i> | <i>Xylocopa virginica</i> |
| OPPQM04817   | <i>Xylocopa</i> | <i>Xylocopa virginica</i> |
| OUHY02309    | <i>Xylocopa</i> | <i>Xylocopa virginica</i> |
| OUHY02509    | <i>Xylocopa</i> | <i>Xylocopa virginica</i> |
| OUHY02609    | <i>Xylocopa</i> | <i>Xylocopa virginica</i> |
| OUHY02809    | <i>Xylocopa</i> | <i>Xylocopa virginica</i> |
| RRMPG93115   | <i>Xylocopa</i> | <i>Xylocopa virginica</i> |
| SMTPL480415  | <i>Xylocopa</i> | <i>Xylocopa virginica</i> |
| TTHYW74408   | <i>Xylocopa</i> | <i>Xylocopa virginica</i> |
| TTHYW82008   | <i>Xylocopa</i> | <i>Xylocopa virginica</i> |
| UPOLB14809   | <i>Xylocopa</i> | <i>Xylocopa virginica</i> |
| UPOLB69909   | <i>Xylocopa</i> | <i>Xylocopa virginica</i> |

---
